# Supplementary material
Source: MDPI journal article supplement (https://www.mdpi.com/2079-9276/7/1/17)
Supplement: s1 [file s1]

# GeRS-DeMo Post Processor

Compilation ran on scenario: Lead

Date: 10/2/2018

# Contents

|          |                           |           |
|----------|---------------------------|-----------|
| <b>1</b> | <b>Africa</b>             | <b>10</b> |
| 1.1      | Algeria . . . . .         | 10        |
| 1.1.1    | All Projections . . . . . | 10        |
| 1.1.2    | By Mineral . . . . .      | 12        |
| 1.2      | Angola . . . . .          | 13        |
| 1.2.1    | All Projections . . . . . | 13        |
| 1.2.2    | By Mineral . . . . .      | 14        |
| 1.3      | Botswana . . . . .        | 15        |
| 1.3.1    | All Projections . . . . . | 15        |
| 1.3.2    | By Mineral . . . . .      | 16        |
| 1.4      | Burkina Faso . . . . .    | 17        |
| 1.4.1    | All Projections . . . . . | 17        |
| 1.4.2    | By Mineral . . . . .      | 18        |
| 1.5      | Congo . . . . .           | 19        |
| 1.5.1    | All Projections . . . . . | 19        |
| 1.5.2    | By Mineral . . . . .      | 20        |
| 1.6      | Egypt . . . . .           | 21        |
| 1.6.1    | All Projections . . . . . | 21        |
| 1.6.2    | By Mineral . . . . .      | 22        |
| 1.7      | Kenya . . . . .           | 23        |
| 1.7.1    | All Projections . . . . . | 23        |
| 1.7.2    | By Mineral . . . . .      | 24        |
| 1.8      | Morocco . . . . .         | 25        |
| 1.8.1    | All Projections . . . . . | 25        |
| 1.8.2    | By Mineral . . . . .      | 26        |
| 1.9      | Namibia . . . . .         | 27        |
| 1.9.1    | All Projections . . . . . | 27        |
| 1.9.2    | By Mineral . . . . .      | 28        |

|        |                           |    |
|--------|---------------------------|----|
| 1.10   | Nigeria . . . . .         | 29 |
| 1.10.1 | All Projections . . . . . | 29 |
| 1.10.2 | By Mineral . . . . .      | 30 |
| 1.11   | South Africa . . . . .    | 31 |
| 1.11.1 | All Projections . . . . . | 31 |
| 1.11.2 | By Mineral . . . . .      | 32 |
| 1.12   | Tanzania . . . . .        | 33 |
| 1.12.1 | All Projections . . . . . | 33 |
| 1.12.2 | By Mineral . . . . .      | 34 |
| 1.13   | Tunisia . . . . .         | 35 |
| 1.13.1 | All Projections . . . . . | 35 |
| 1.13.2 | By Mineral . . . . .      | 36 |
| 1.14   | Uganda . . . . .          | 37 |
| 1.14.1 | All Projections . . . . . | 37 |
| 1.14.2 | By Mineral . . . . .      | 38 |
| 1.15   | Zaire . . . . .           | 39 |
| 1.15.1 | All Projections . . . . . | 39 |
| 1.15.2 | By Mineral . . . . .      | 40 |
| 1.16   | Zambia . . . . .          | 41 |
| 1.16.1 | All Projections . . . . . | 41 |
| 1.16.2 | By Mineral . . . . .      | 42 |
| 1.17   | Zimbabwe . . . . .        | 43 |
| 1.17.1 | All Projections . . . . . | 43 |
| 1.17.2 | By Mineral . . . . .      | 44 |
| 1.18   | Total . . . . .           | 45 |
| 1.18.1 | By country . . . . .      | 45 |
| 1.18.2 | By mineral . . . . .      | 45 |

## 2 Asia 48

|       |                           |    |
|-------|---------------------------|----|
| 2.1   | Australia . . . . .       | 48 |
| 2.1.1 | All Projections . . . . . | 48 |
| 2.1.2 | By Mineral . . . . .      | 50 |
| 2.2   | Burma . . . . .           | 51 |
| 2.2.1 | All Projections . . . . . | 51 |
| 2.2.2 | By Mineral . . . . .      | 52 |
| 2.3   | China . . . . .           | 53 |

|        |                           |    |
|--------|---------------------------|----|
| 2.3.1  | All Projections . . . . . | 53 |
| 2.3.2  | By Mineral . . . . .      | 54 |
| 2.4    | Hong Kong . . . . .       | 55 |
| 2.4.1  | All Projections . . . . . | 55 |
| 2.4.2  | By Mineral . . . . .      | 56 |
| 2.5    | India . . . . .           | 57 |
| 2.5.1  | All Projections . . . . . | 57 |
| 2.5.2  | By Mineral . . . . .      | 58 |
| 2.6    | Indonesia . . . . .       | 59 |
| 2.6.1  | All Projections . . . . . | 59 |
| 2.6.2  | By Mineral . . . . .      | 60 |
| 2.7    | Iran . . . . .            | 61 |
| 2.7.1  | All Projections . . . . . | 61 |
| 2.7.2  | By Mineral . . . . .      | 62 |
| 2.8    | Japan . . . . .           | 63 |
| 2.8.1  | All Projections . . . . . | 63 |
| 2.8.2  | By Mineral . . . . .      | 64 |
| 2.9    | Laos . . . . .            | 65 |
| 2.9.1  | All Projections . . . . . | 65 |
| 2.9.2  | By Mineral . . . . .      | 66 |
| 2.10   | Malaysia . . . . .        | 67 |
| 2.10.1 | All Projections . . . . . | 67 |
| 2.10.2 | By Mineral . . . . .      | 68 |
| 2.11   | Nepal . . . . .           | 69 |
| 2.11.1 | All Projections . . . . . | 69 |
| 2.11.2 | By Mineral . . . . .      | 70 |
| 2.12   | New Caledonia . . . . .   | 71 |
| 2.12.1 | All Projections . . . . . | 71 |
| 2.12.2 | By Mineral . . . . .      | 72 |
| 2.13   | North Korea . . . . .     | 73 |
| 2.13.1 | All Projections . . . . . | 73 |
| 2.13.2 | By Mineral . . . . .      | 74 |
| 2.14   | PNG . . . . .             | 75 |
| 2.14.1 | All Projections . . . . . | 75 |
| 2.14.2 | By Mineral . . . . .      | 76 |
| 2.15   | Pakistan . . . . .        | 77 |

|        |                           |    |
|--------|---------------------------|----|
| 2.15.1 | All Projections . . . . . | 77 |
| 2.15.2 | By Mineral . . . . .      | 78 |
| 2.16   | Philippines . . . . .     | 79 |
| 2.16.1 | All Projections . . . . . | 79 |
| 2.16.2 | By Mineral . . . . .      | 80 |
| 2.17   | Saudi Arabia . . . . .    | 81 |
| 2.17.1 | All Projections . . . . . | 81 |
| 2.17.2 | By Mineral . . . . .      | 82 |
| 2.18   | South Korea . . . . .     | 83 |
| 2.18.1 | All Projections . . . . . | 83 |
| 2.18.2 | By Mineral . . . . .      | 84 |
| 2.19   | Thailand . . . . .        | 85 |
| 2.19.1 | All Projections . . . . . | 85 |
| 2.19.2 | By Mineral . . . . .      | 86 |
| 2.20   | Vietnam . . . . .         | 87 |
| 2.20.1 | All Projections . . . . . | 87 |
| 2.20.2 | By Mineral . . . . .      | 88 |
| 2.21   | Yemen . . . . .           | 89 |
| 2.21.1 | All Projections . . . . . | 89 |
| 2.21.2 | By Mineral . . . . .      | 90 |
| 2.22   | Total . . . . .           | 91 |
| 2.22.1 | By country . . . . .      | 91 |
| 2.22.2 | By mineral . . . . .      | 91 |

### **3 Central America 94**

|       |                           |     |
|-------|---------------------------|-----|
| 3.1   | Cuba . . . . .            | 94  |
| 3.1.1 | All Projections . . . . . | 94  |
| 3.1.2 | By Mineral . . . . .      | 96  |
| 3.2   | Guatemala . . . . .       | 97  |
| 3.2.1 | All Projections . . . . . | 97  |
| 3.2.2 | By Mineral . . . . .      | 98  |
| 3.3   | Honduras . . . . .        | 99  |
| 3.3.1 | All Projections . . . . . | 99  |
| 3.3.2 | By Mineral . . . . .      | 100 |
| 3.4   | Mexico . . . . .          | 101 |
| 3.4.1 | All Projections . . . . . | 101 |

|       |                      |     |
|-------|----------------------|-----|
| 3.4.2 | By Mineral . . . . . | 102 |
| 3.5   | Total . . . . .      | 103 |
| 3.5.1 | By country . . . . . | 103 |
| 3.5.2 | By mineral . . . . . | 103 |

## 4 Europe 105

|        |                                  |     |
|--------|----------------------------------|-----|
| 4.1    | Austria . . . . .                | 105 |
| 4.1.1  | All Projections . . . . .        | 105 |
| 4.1.2  | By Mineral . . . . .             | 107 |
| 4.2    | Bosnia and Herzegovina . . . . . | 108 |
| 4.2.1  | All Projections . . . . .        | 108 |
| 4.2.2  | By Mineral . . . . .             | 109 |
| 4.3    | Bulgaria . . . . .               | 110 |
| 4.3.1  | All Projections . . . . .        | 110 |
| 4.3.2  | By Mineral . . . . .             | 111 |
| 4.4    | Czechoslovakia . . . . .         | 112 |
| 4.4.1  | All Projections . . . . .        | 112 |
| 4.4.2  | By Mineral . . . . .             | 113 |
| 4.5    | Finland . . . . .                | 114 |
| 4.5.1  | All Projections . . . . .        | 114 |
| 4.5.2  | By Mineral . . . . .             | 115 |
| 4.6    | France . . . . .                 | 116 |
| 4.6.1  | All Projections . . . . .        | 116 |
| 4.6.2  | By Mineral . . . . .             | 117 |
| 4.7    | Germany . . . . .                | 118 |
| 4.7.1  | All Projections . . . . .        | 118 |
| 4.7.2  | By Mineral . . . . .             | 119 |
| 4.8    | Greece . . . . .                 | 120 |
| 4.8.1  | All Projections . . . . .        | 120 |
| 4.8.2  | By Mineral . . . . .             | 121 |
| 4.9    | Greenland . . . . .              | 122 |
| 4.9.1  | All Projections . . . . .        | 122 |
| 4.9.2  | By Mineral . . . . .             | 123 |
| 4.10   | Hungary . . . . .                | 124 |
| 4.10.1 | All Projections . . . . .        | 124 |
| 4.10.2 | By Mineral . . . . .             | 125 |

|        |                           |     |
|--------|---------------------------|-----|
| 4.11   | Ireland . . . . .         | 126 |
| 4.11.1 | All Projections . . . . . | 126 |
| 4.11.2 | By Mineral . . . . .      | 127 |
| 4.12   | Italy . . . . .           | 128 |
| 4.12.1 | All Projections . . . . . | 128 |
| 4.12.2 | By Mineral . . . . .      | 129 |
| 4.13   | Kosovo . . . . .          | 130 |
| 4.13.1 | All Projections . . . . . | 130 |
| 4.13.2 | By Mineral . . . . .      | 131 |
| 4.14   | Macedonia . . . . .       | 132 |
| 4.14.1 | All Projections . . . . . | 132 |
| 4.14.2 | By Mineral . . . . .      | 133 |
| 4.15   | Montenegro . . . . .      | 134 |
| 4.15.1 | All Projections . . . . . | 134 |
| 4.15.2 | By Mineral . . . . .      | 135 |
| 4.16   | Norway . . . . .          | 136 |
| 4.16.1 | All Projections . . . . . | 136 |
| 4.16.2 | By Mineral . . . . .      | 137 |
| 4.17   | Poland . . . . .          | 138 |
| 4.17.1 | All Projections . . . . . | 138 |
| 4.17.2 | By Mineral . . . . .      | 139 |
| 4.18   | Portugal . . . . .        | 140 |
| 4.18.1 | All Projections . . . . . | 140 |
| 4.18.2 | By Mineral . . . . .      | 141 |
| 4.19   | Romania . . . . .         | 142 |
| 4.19.1 | All Projections . . . . . | 142 |
| 4.19.2 | By Mineral . . . . .      | 143 |
| 4.20   | Serbia . . . . .          | 144 |
| 4.20.1 | All Projections . . . . . | 144 |
| 4.20.2 | By Mineral . . . . .      | 145 |
| 4.21   | Slovakia . . . . .        | 146 |
| 4.21.1 | All Projections . . . . . | 146 |
| 4.21.2 | By Mineral . . . . .      | 147 |
| 4.22   | Slovenia . . . . .        | 148 |
| 4.22.1 | All Projections . . . . . | 148 |
| 4.22.2 | By Mineral . . . . .      | 149 |

|          |                           |            |
|----------|---------------------------|------------|
| 4.23     | Spain . . . . .           | 150        |
| 4.23.1   | All Projections . . . . . | 150        |
| 4.23.2   | By Mineral . . . . .      | 151        |
| 4.24     | Sweden . . . . .          | 152        |
| 4.24.1   | All Projections . . . . . | 152        |
| 4.24.2   | By Mineral . . . . .      | 153        |
| 4.25     | Turkey . . . . .          | 154        |
| 4.25.1   | All Projections . . . . . | 154        |
| 4.25.2   | By Mineral . . . . .      | 155        |
| 4.26     | UK . . . . .              | 156        |
| 4.26.1   | All Projections . . . . . | 156        |
| 4.26.2   | By Mineral . . . . .      | 157        |
| 4.27     | Yugoslavia . . . . .      | 158        |
| 4.27.1   | All Projections . . . . . | 158        |
| 4.27.2   | By Mineral . . . . .      | 159        |
| 4.28     | Total . . . . .           | 160        |
| 4.28.1   | By country . . . . .      | 160        |
| 4.28.2   | By mineral . . . . .      | 162        |
| <b>5</b> | <b>FSU</b>                | <b>163</b> |
| 5.1      | FSU . . . . .             | 163        |
| 5.1.1    | All Projections . . . . . | 163        |
| 5.1.2    | By Mineral . . . . .      | 165        |
| 5.2      | Total . . . . .           | 166        |
| 5.2.1    | By country . . . . .      | 166        |
| 5.2.2    | By mineral . . . . .      | 167        |
| <b>6</b> | <b>North America</b>      | <b>168</b> |
| 6.1      | Canada . . . . .          | 168        |
| 6.1.1    | All Projections . . . . . | 168        |
| 6.1.2    | By Mineral . . . . .      | 170        |
| 6.2      | USA . . . . .             | 171        |
| 6.2.1    | All Projections . . . . . | 171        |
| 6.2.2    | By Mineral . . . . .      | 172        |
| 6.3      | Total . . . . .           | 173        |
| 6.3.1    | By country . . . . .      | 173        |
| 6.3.2    | By mineral . . . . .      | 174        |



|          |                           |            |
|----------|---------------------------|------------|
| <b>7</b> | <b>South America</b>      | <b>175</b> |
| 7.1      | Argentina . . . . .       | 175        |
| 7.1.1    | All Projections . . . . . | 175        |
| 7.1.2    | By Mineral . . . . .      | 177        |
| 7.2      | Bolivia . . . . .         | 178        |
| 7.2.1    | All Projections . . . . . | 178        |
| 7.2.2    | By Mineral . . . . .      | 179        |
| 7.3      | Brazil . . . . .          | 180        |
| 7.3.1    | All Projections . . . . . | 180        |
| 7.3.2    | By Mineral . . . . .      | 181        |
| 7.4      | Chile . . . . .           | 182        |
| 7.4.1    | All Projections . . . . . | 182        |
| 7.4.2    | By Mineral . . . . .      | 183        |
| 7.5      | Colombia . . . . .        | 184        |
| 7.5.1    | All Projections . . . . . | 184        |
| 7.5.2    | By Mineral . . . . .      | 185        |
| 7.6      | Ecuador . . . . .         | 186        |
| 7.6.1    | All Projections . . . . . | 186        |
| 7.6.2    | By Mineral . . . . .      | 187        |
| 7.7      | Peru . . . . .            | 188        |
| 7.7.1    | All Projections . . . . . | 188        |
| 7.7.2    | By Mineral . . . . .      | 189        |
| 7.8      | Uruguay . . . . .         | 190        |
| 7.8.1    | All Projections . . . . . | 190        |
| 7.8.2    | By Mineral . . . . .      | 191        |
| 7.9      | Total . . . . .           | 192        |
| 7.9.1    | By country . . . . .      | 192        |
| 7.9.2    | By mineral . . . . .      | 192        |
| <b>8</b> | <b>recycle</b>            | <b>194</b> |
| <b>9</b> | <b>Total</b>              | <b>195</b> |
| 9.1      | By continent . . . . .    | 195        |
| 9.2      | By mineral . . . . .      | 197        |
| 9.3      | By Country . . . . .      | 198        |

# Chapter 1

## Africa

### 1.1 Algeria

#### 1.1.1 All Projections

Table 1.1: Peak years - All

| <b>Name</b>  | <b>URR</b>  | <b>Peak Year</b> | <b>Peak Rate</b> |
|--------------|-------------|------------------|------------------|
| Lead         | 2.84        | 2072             | 0.06             |
| <b>Total</b> | <b>2.84</b> | <b>2072</b>      | <b>0.06</b>      |

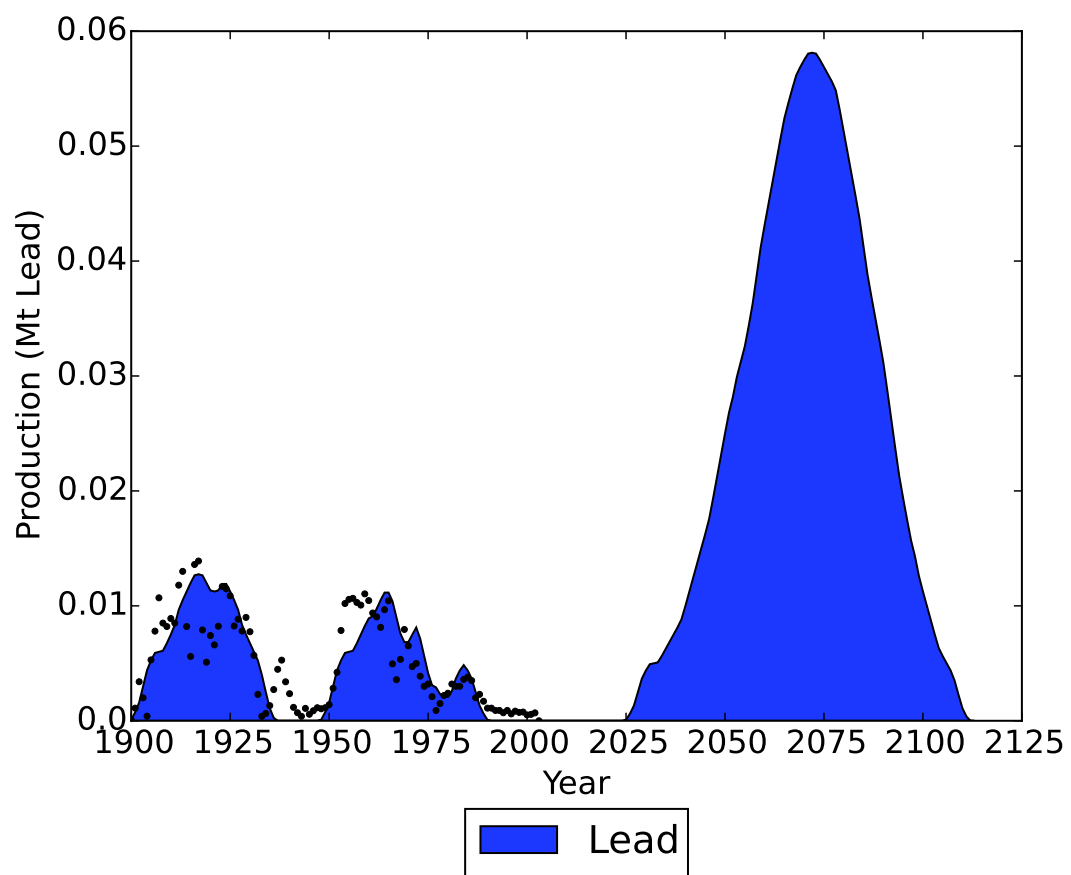

Figure 1.1: Algeria projections capped at 16

### 1.1.2 By Mineral

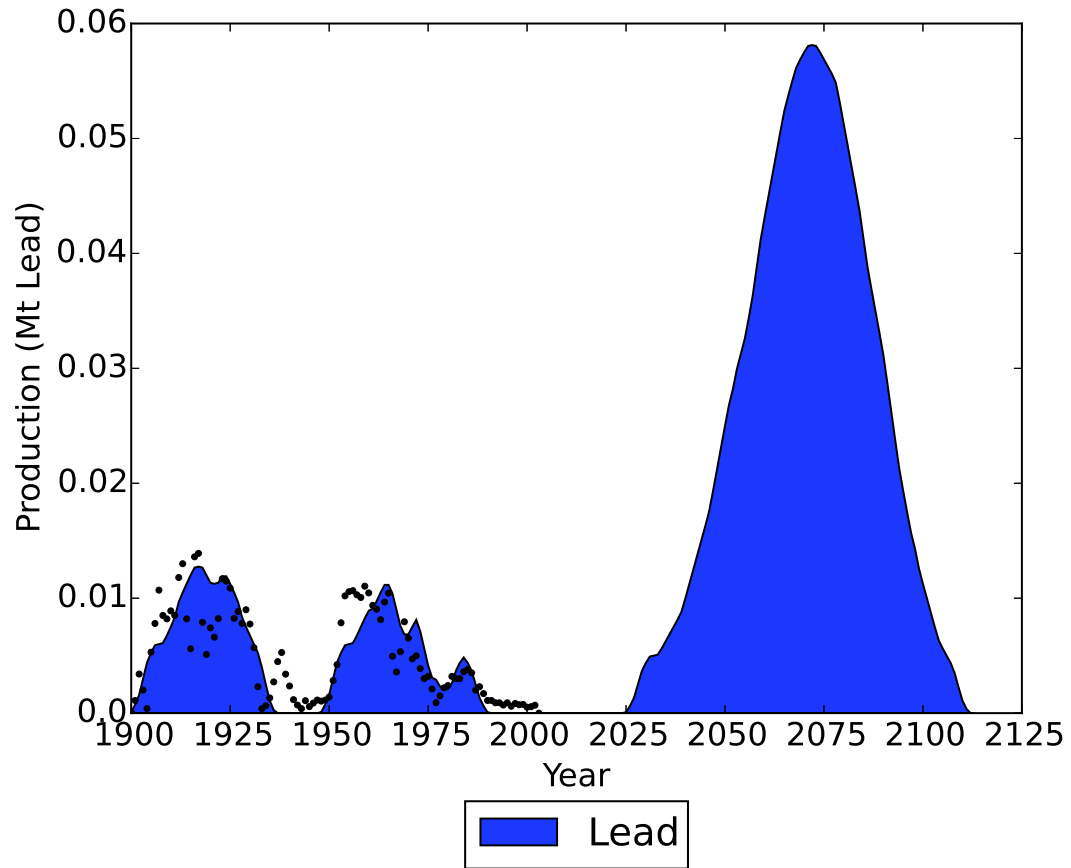

Figure 1.2: Algeria projection by mineral type

Table 1.2: Peak years - Minerals

| Name         | URR         | Peak Year   | Peak Rate   |
|--------------|-------------|-------------|-------------|
| Lead         | 2.84        | 2072        | 0.06        |
| <b>Total</b> | <b>2.84</b> | <b>2072</b> | <b>0.06</b> |

# 1.2 Angola

## 1.2.1 All Projections

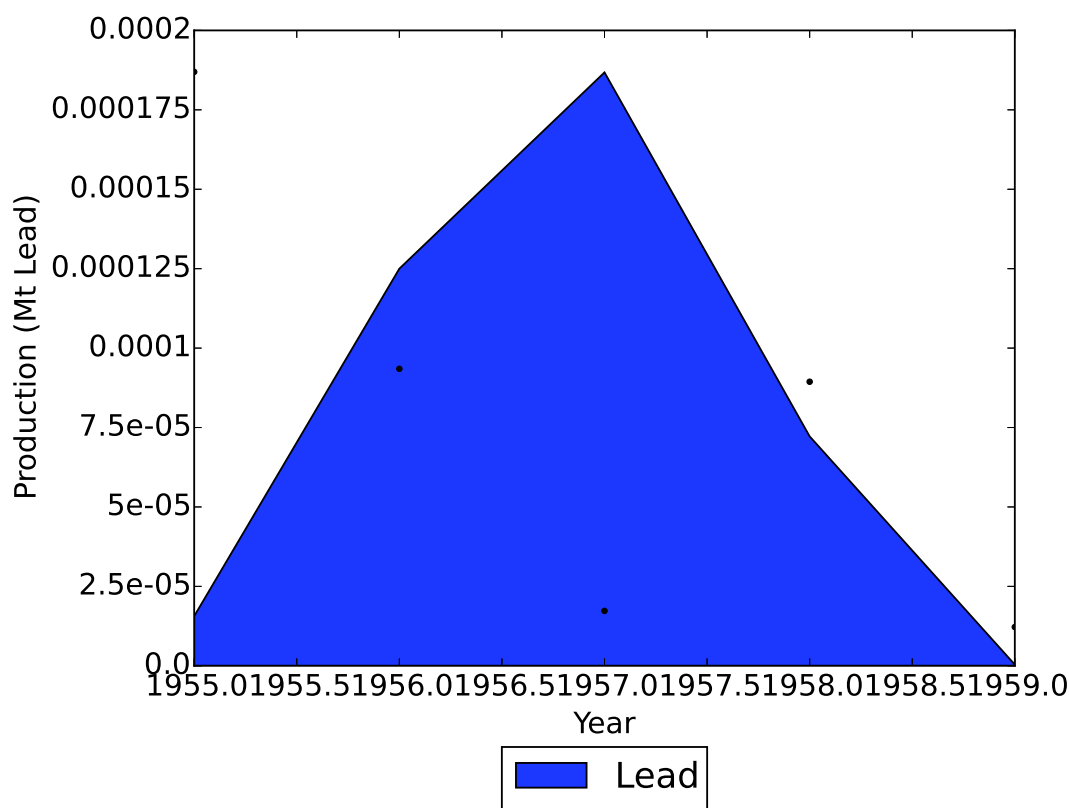

Figure 1.3: Angola projections capped at 16

| Table 1.3: Peak years - All |     |           |           |
|-----------------------------|-----|-----------|-----------|
| Name                        | URR | Peak Year | Peak Rate |
| Lead                        | –   | 1957      | –         |
| Total                       | –   | 1957      | –         |

1.2.2 By Mineral

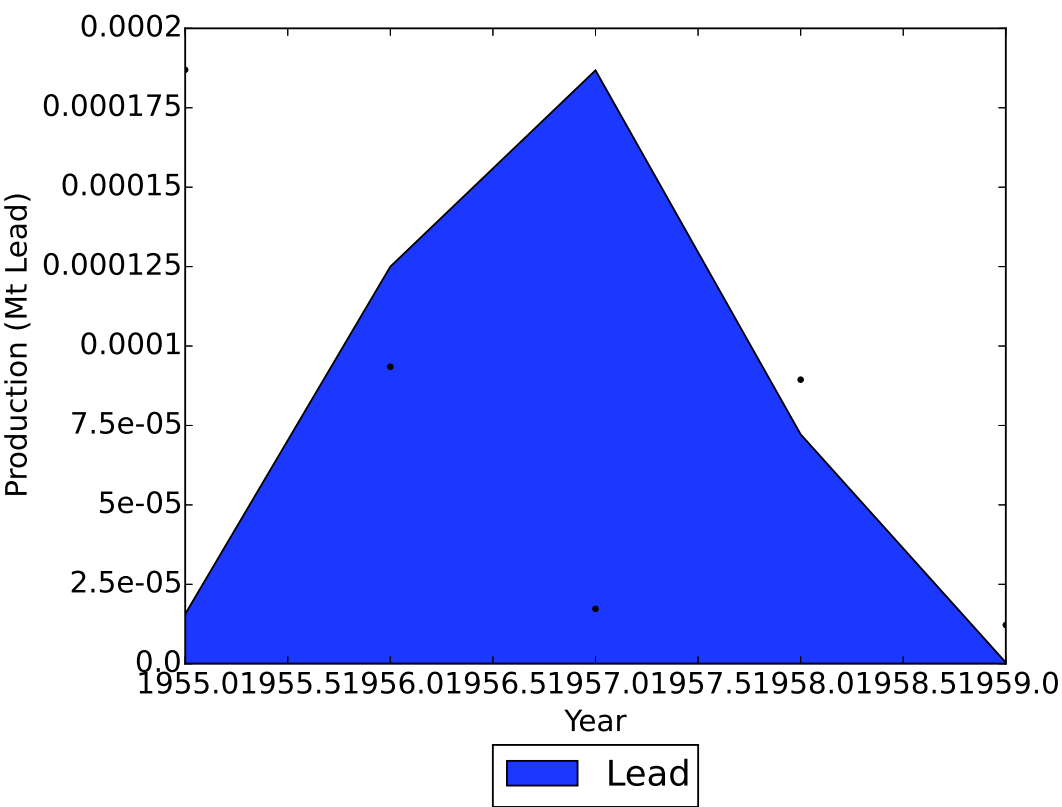

Figure 1.4: Angola projection by mineral type

| Table 1.4: Peak years - Minerals |     |           |           |
|----------------------------------|-----|-----------|-----------|
| Name                             | URR | Peak Year | Peak Rate |
| Lead                             | –   | 1957      | –         |
| Total                            | –   | 1957      | –         |

## 1.3 Botswana

### 1.3.1 All Projections

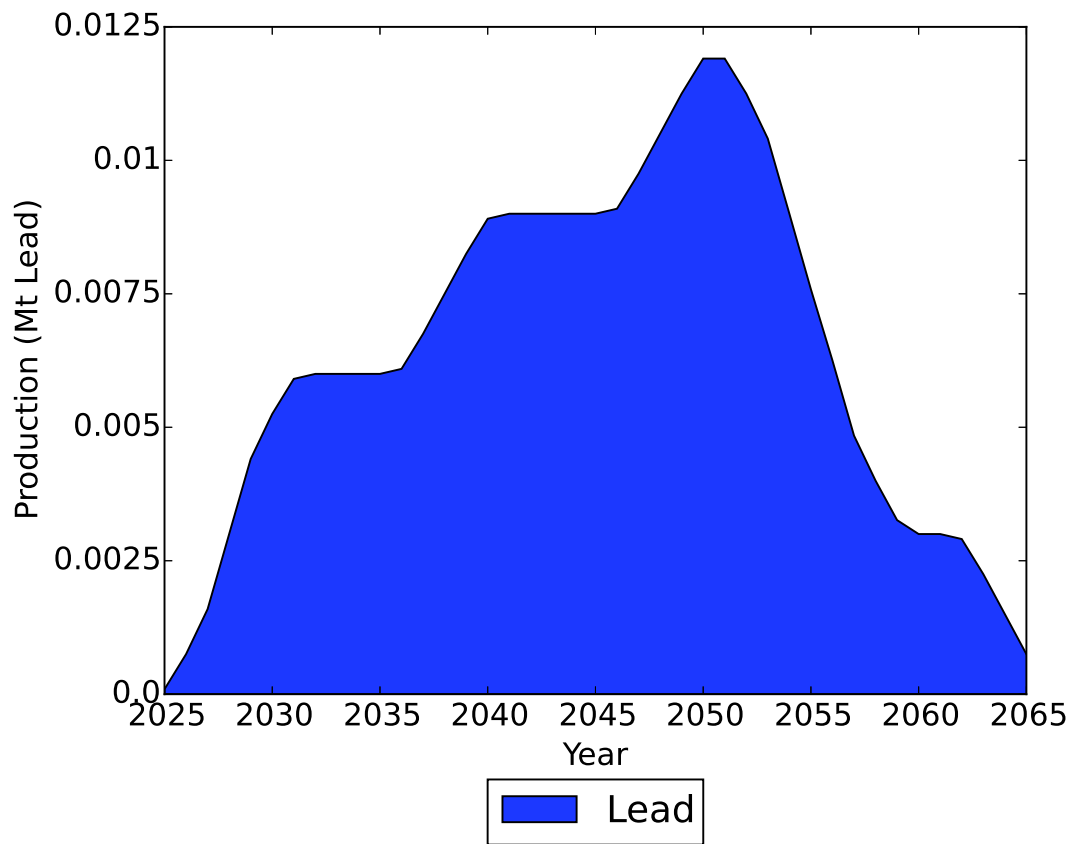

Figure 1.5: Botswana projections capped at 16

| Table 1.5: Peak years - All |      |           |           |
|-----------------------------|------|-----------|-----------|
| Name                        | URR  | Peak Year | Peak Rate |
| Lead                        | 0.26 | 2050      | 0.01      |
| Total                       | 0.26 | 2050      | 0.01      |

1.3.2 By Mineral

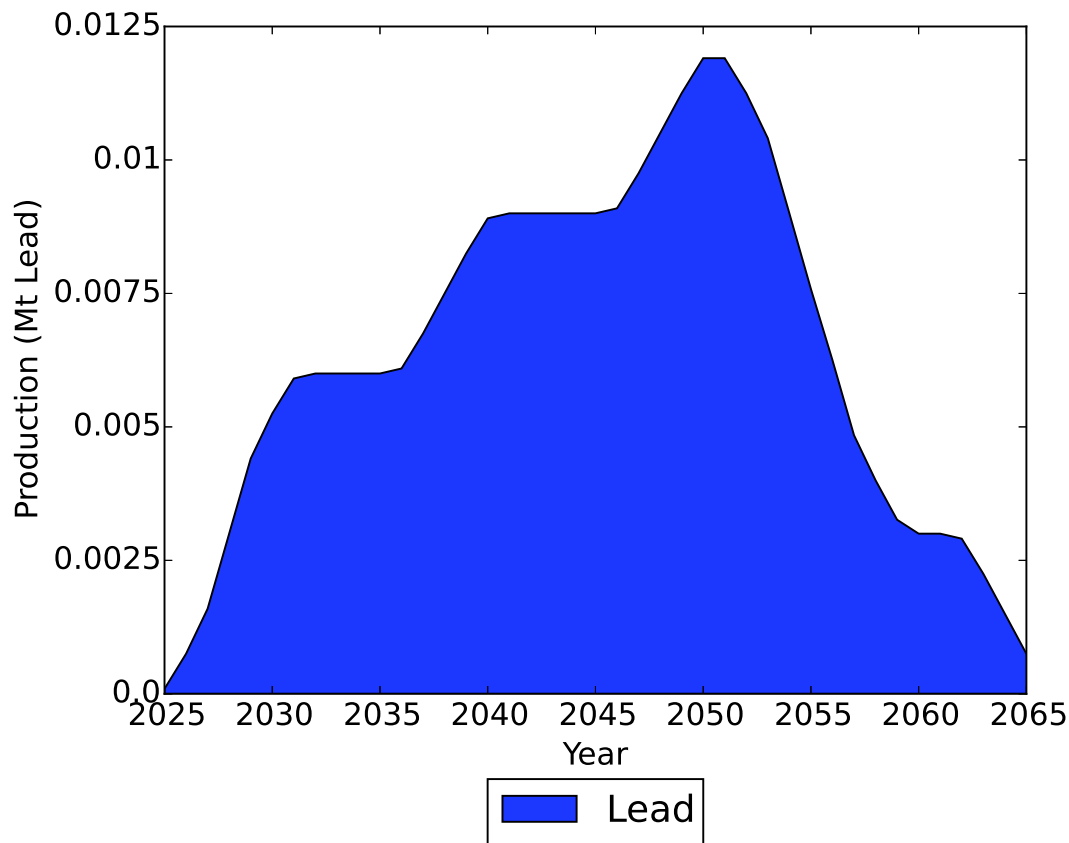

Figure 1.6: Botswana projection by mineral type

Table 1.6: Peak years - Minerals

| Name  | URR  | Peak Year | Peak Rate |
|-------|------|-----------|-----------|
| Lead  | 0.26 | 2050      | 0.01      |
| Total | 0.26 | 2050      | 0.01      |



## 1.4 Burkina Faso

### 1.4.1 All Projections

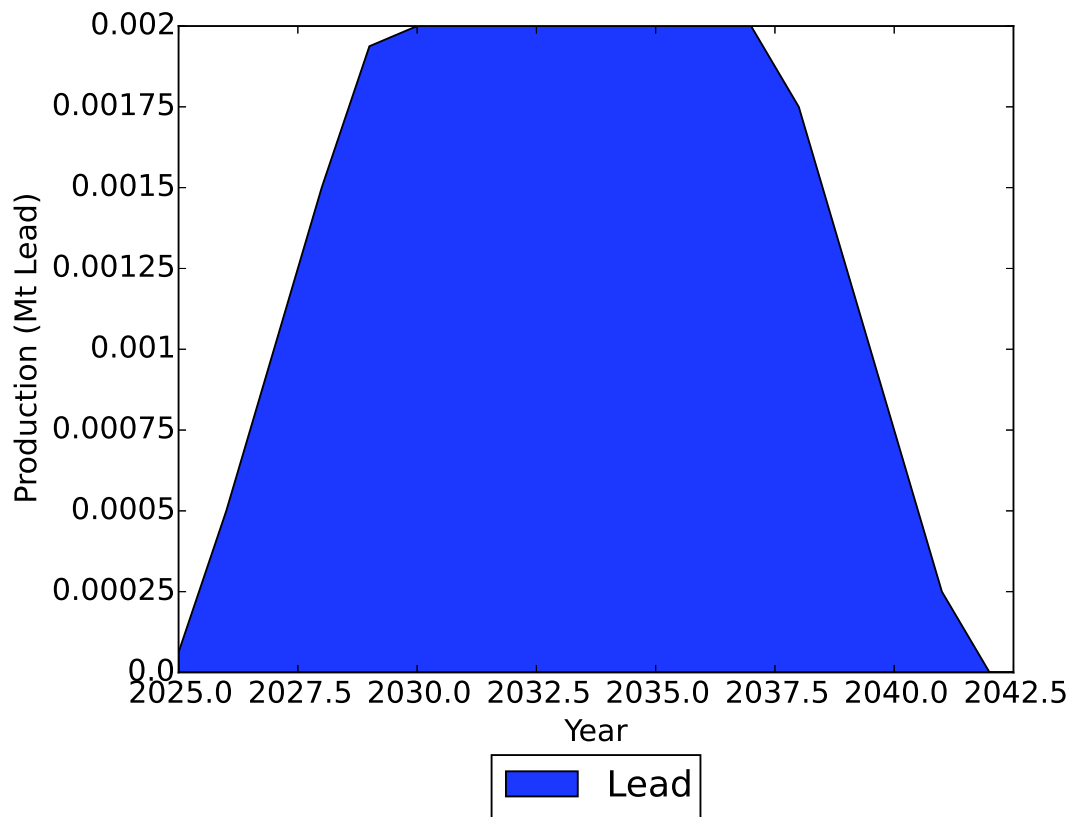

Figure 1.7: Burkina Faso projections capped at 16

Table 1.7: Peak years - All

| Name  | URR  | Peak Year | Peak Rate |
|-------|------|-----------|-----------|
| Lead  | 0.03 | 2030      | –         |
| Total | 0.03 | 2030      | –         |

1.4.2 By Mineral

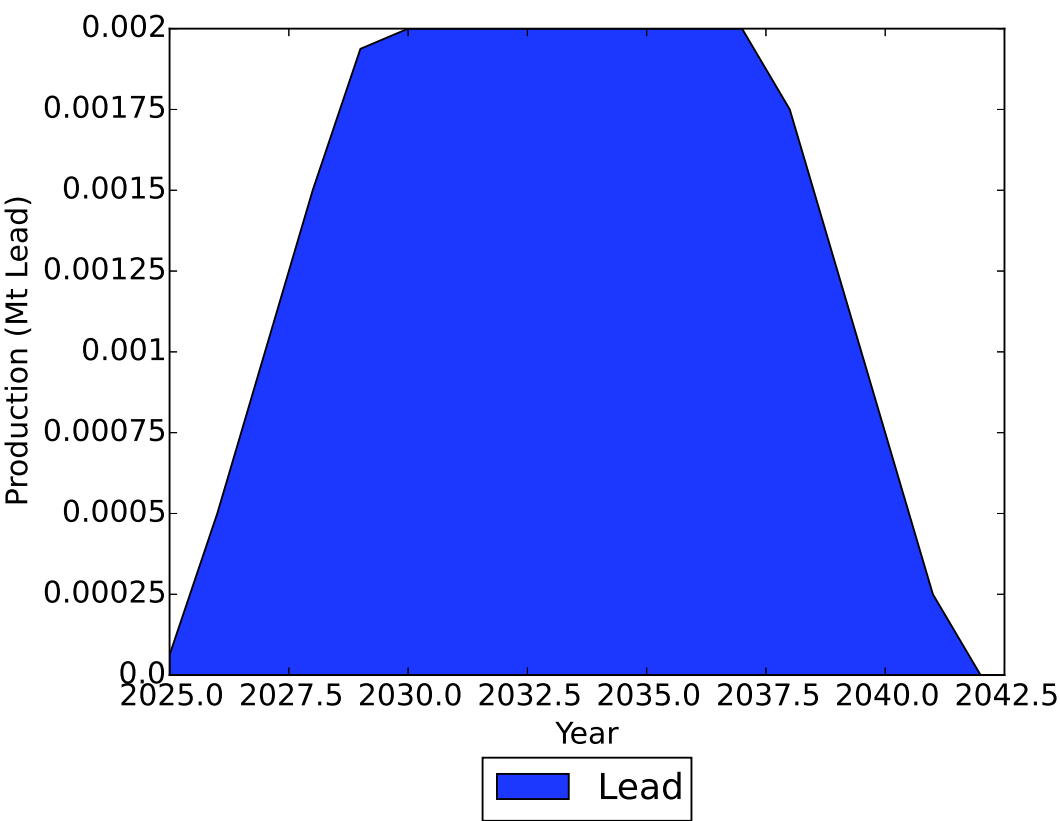

Figure 1.8: Burkina Faso projection by mineral type

| Table 1.8: Peak years - Minerals |      |           |           |
|----------------------------------|------|-----------|-----------|
| Name                             | URR  | Peak Year | Peak Rate |
| Lead                             | 0.03 | 2030      | –         |
| Total                            | 0.03 | 2030      | –         |

1.5 Congo

1.5.1 All Projections

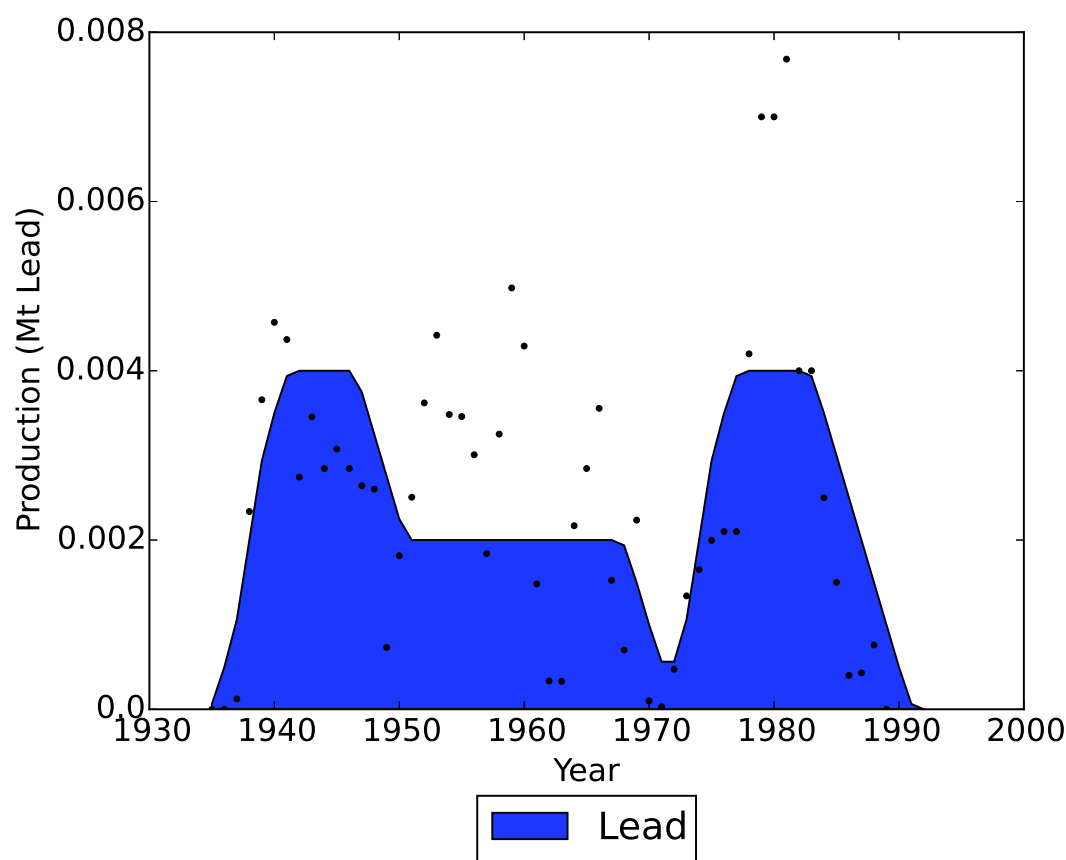

Figure 1.9: Congo projections capped at 16

| Table 1.9: Peak years - All |             |             |           |
|-----------------------------|-------------|-------------|-----------|
| Name                        | URR         | Peak Year   | Peak Rate |
| Lead                        | 0.14        | 1942        | —         |
| <b>Total</b>                | <b>0.14</b> | <b>1942</b> | —         |

1.5.2 By Mineral

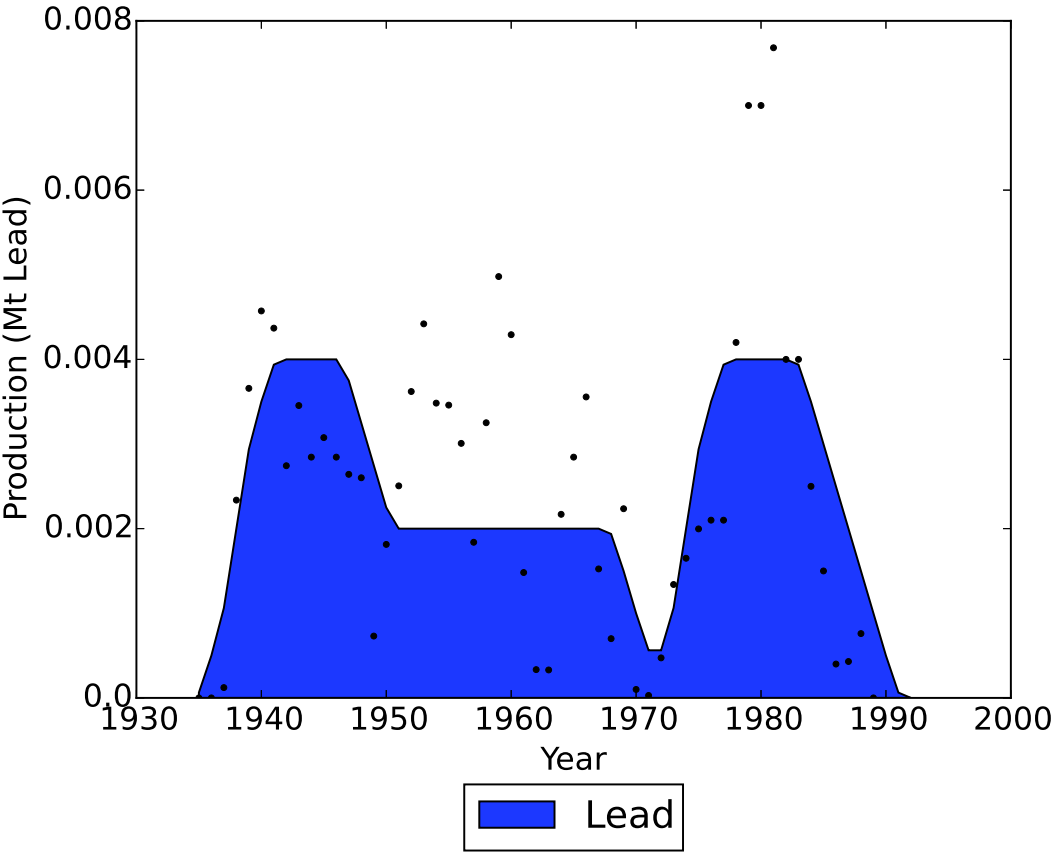

Figure 1.10: Congo projection by mineral type

| Table 1.10: Peak years - Minerals |             |             |           |
|-----------------------------------|-------------|-------------|-----------|
| Name                              | URR         | Peak Year   | Peak Rate |
| Lead                              | 0.14        | 1942        | —         |
| <b>Total</b>                      | <b>0.14</b> | <b>1942</b> | —         |

## 1.6 Egypt

### 1.6.1 All Projections

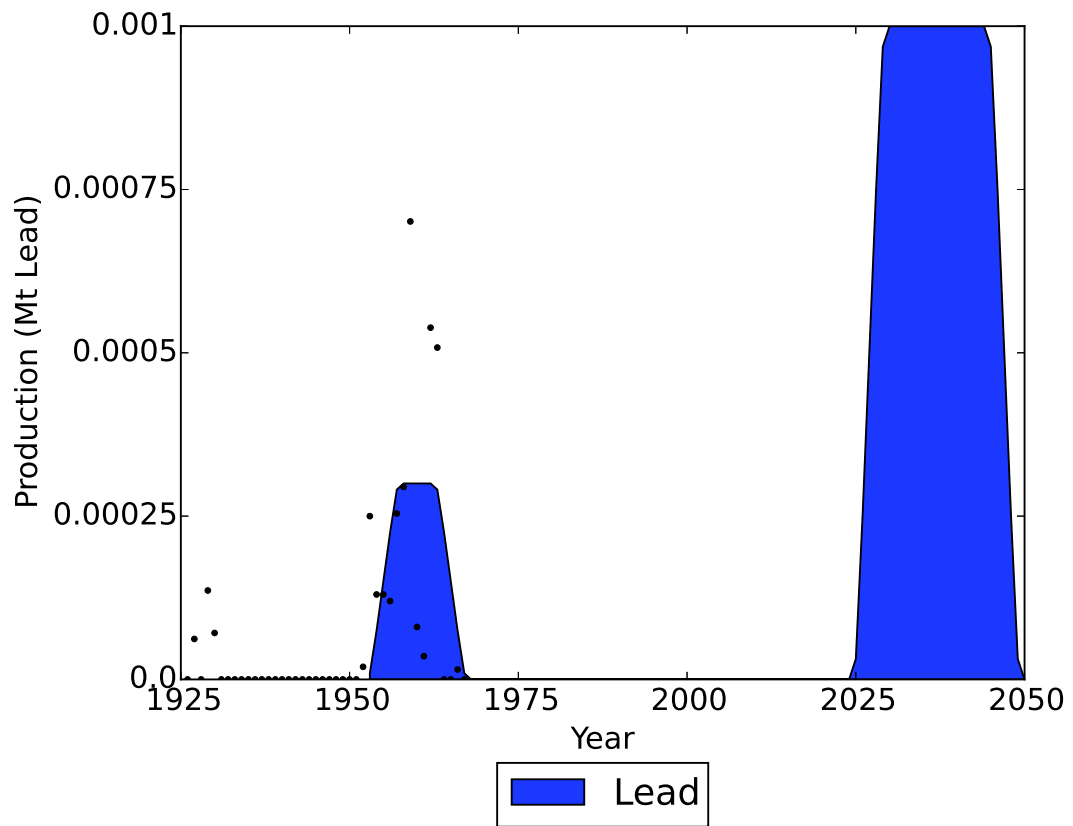

Figure 1.11: Egypt projections capped at 16

Table 1.11: Peak years - All

| Name  | URR  | Peak Year | Peak Rate |
|-------|------|-----------|-----------|
| Lead  | 0.02 | 2030      | —         |
| Total | 0.02 | 2030      | —         |

1.6.2 By Mineral

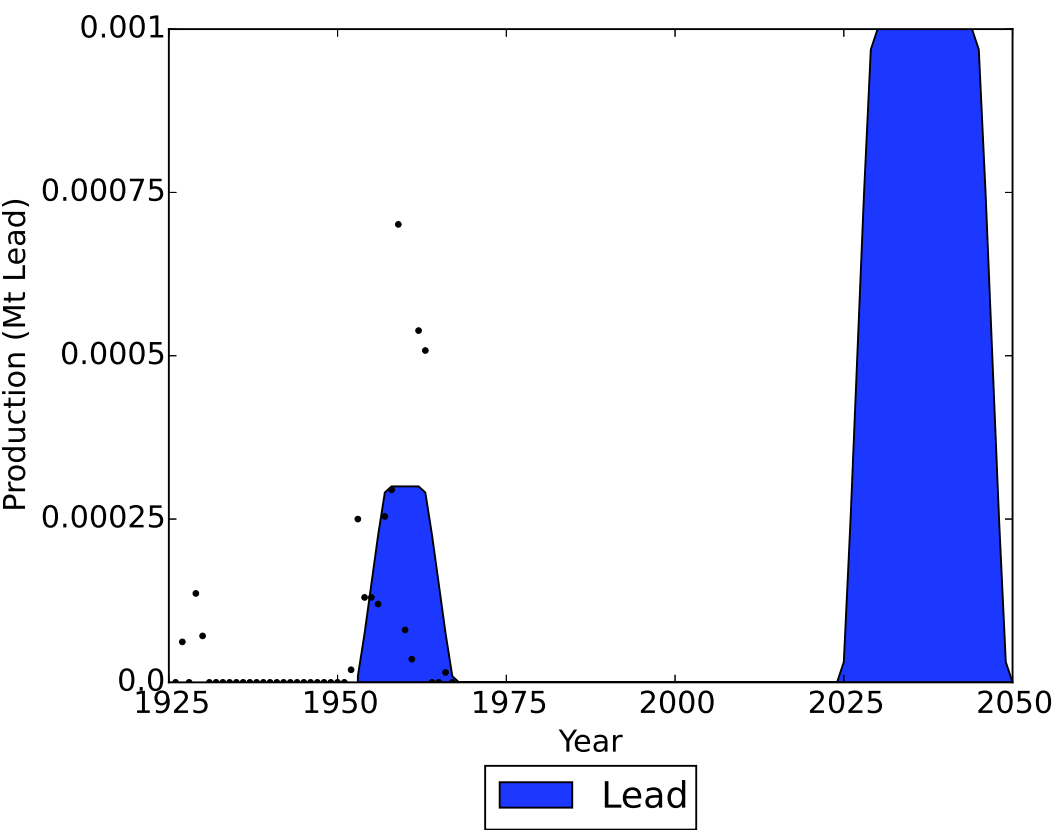

Figure 1.12: Egypt projection by mineral type

Table 1.12: Peak years - Minerals

| Name  | URR  | Peak Year | Peak Rate |
|-------|------|-----------|-----------|
| Lead  | 0.02 | 2030      | —         |
| Total | 0.02 | 2030      | —         |

1.7 Kenya

1.7.1 All Projections

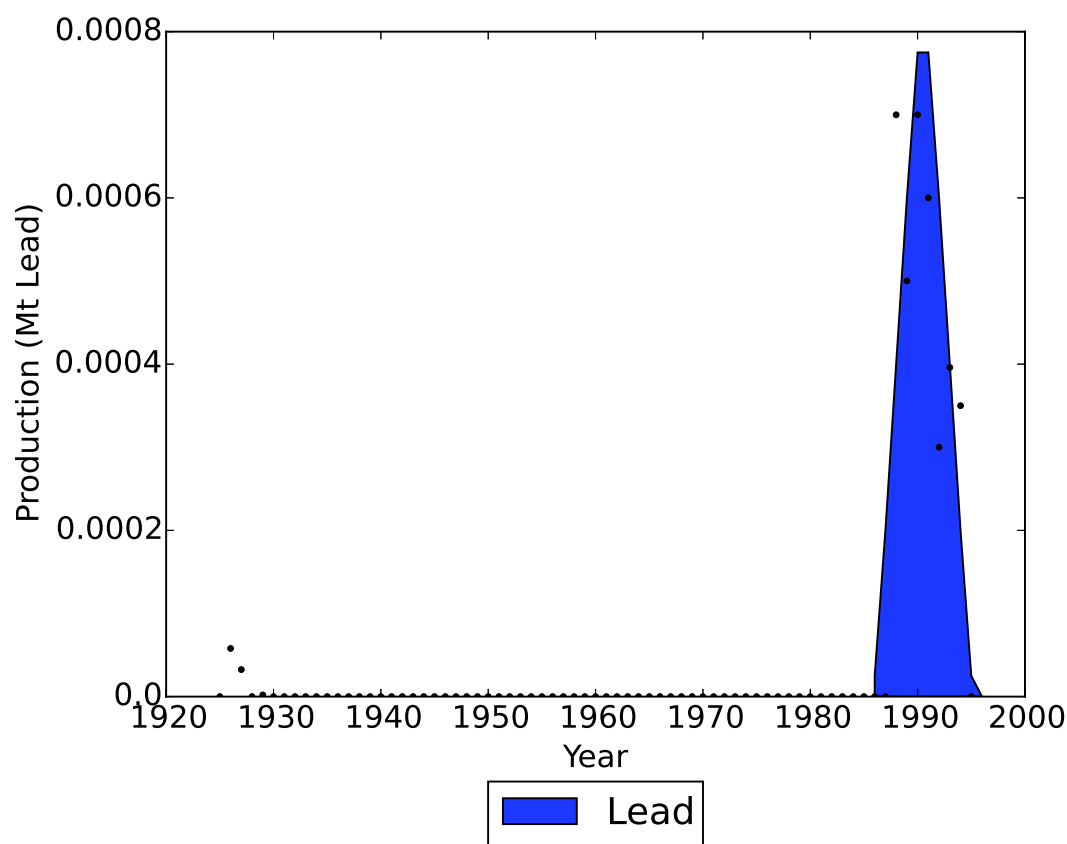

Figure 1.13: Kenya projections capped at 16

Table 1.13: Peak years - All

| Name  | URR | Peak Year | Peak Rate |
|-------|-----|-----------|-----------|
| Lead  | —   | 1990      | —         |
| Total | —   | 1990      | —         |

1.7.2 By Mineral

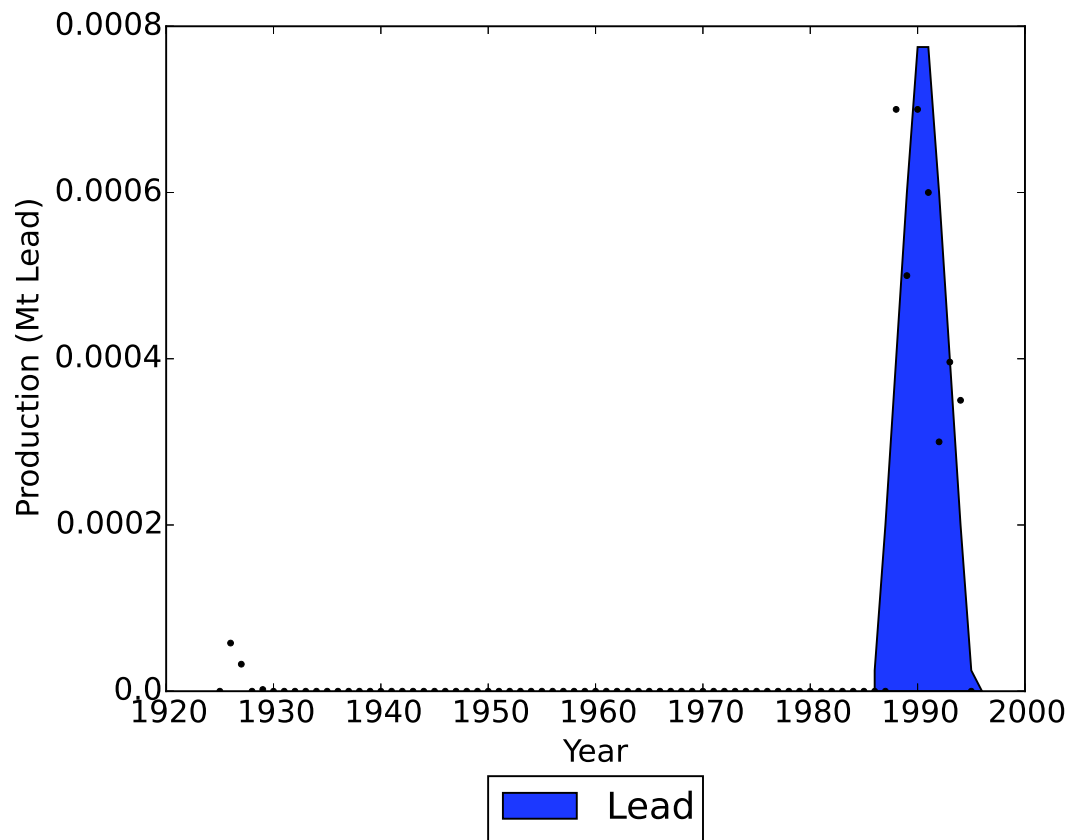

Figure 1.14: Kenya projection by mineral type

Table 1.14: Peak years - Minerals

| Name  | URR | Peak Year | Peak Rate |
|-------|-----|-----------|-----------|
| Lead  | –   | 1990      | –         |
| Total | –   | 1990      | –         |



1.8 Morocco

1.8.1 All Projections

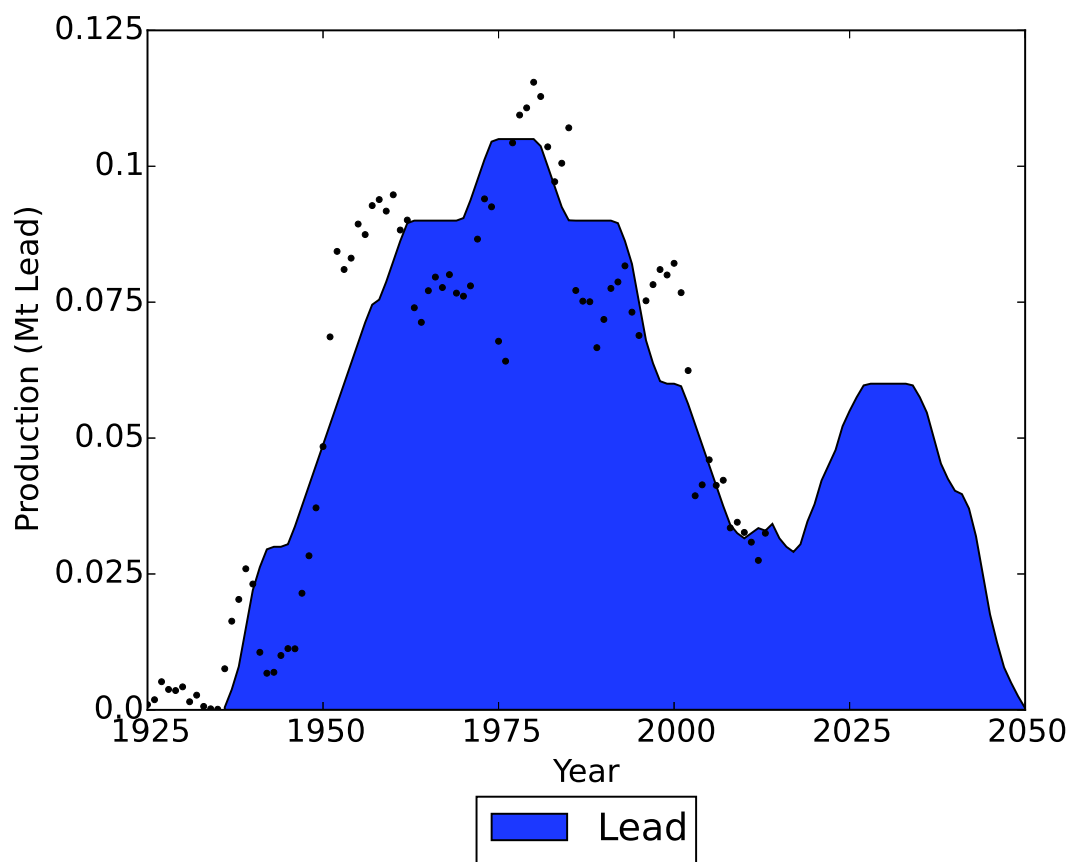

Figure 1.15: Morocco projections capped at 16

Table 1.15: Peak years - All

| Name  | URR  | Peak Year | Peak Rate |
|-------|------|-----------|-----------|
| Lead  | 6.69 | 1975      | 0.11      |
| Total | 6.69 | 1975      | 0.11      |

1.8.2 By Mineral

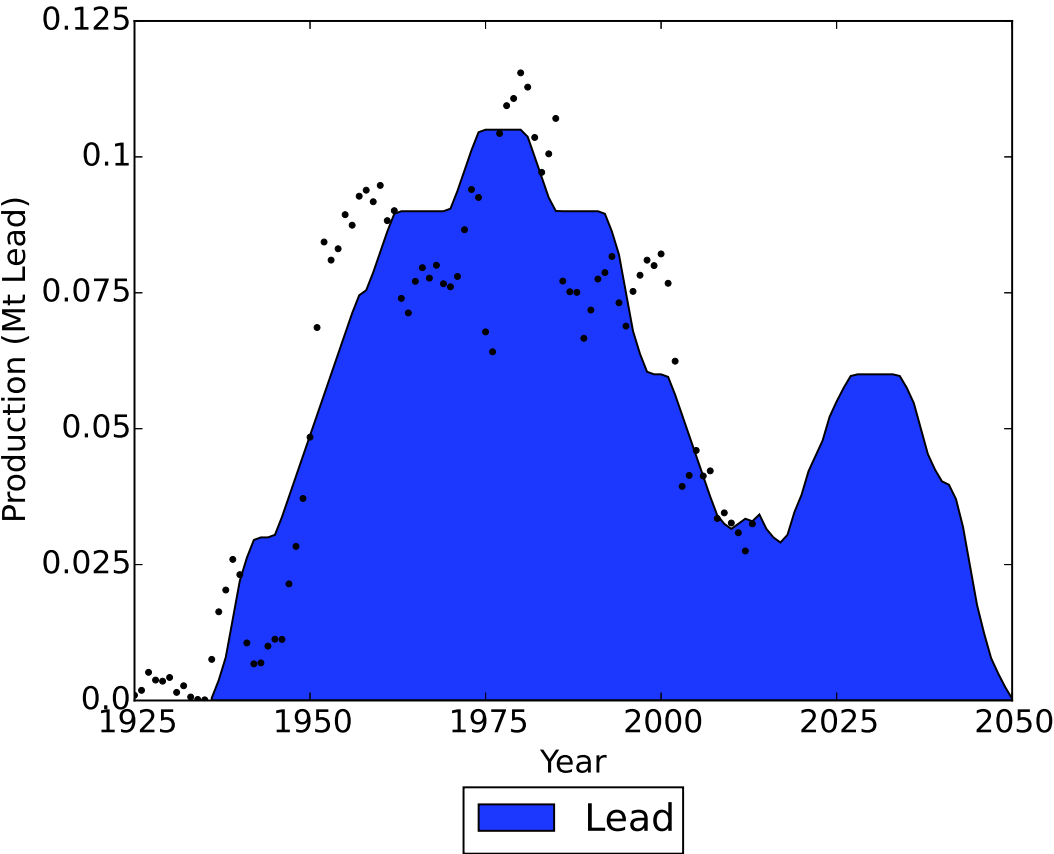

Figure 1.16: Morocco projection by mineral type

| Table 1.16: Peak years - Minerals |      |           |           |
|-----------------------------------|------|-----------|-----------|
| Name                              | URR  | Peak Year | Peak Rate |
| Lead                              | 6.69 | 1975      | 0.11      |
| Total                             | 6.69 | 1975      | 0.11      |

1.9 Namibia

1.9.1 All Projections

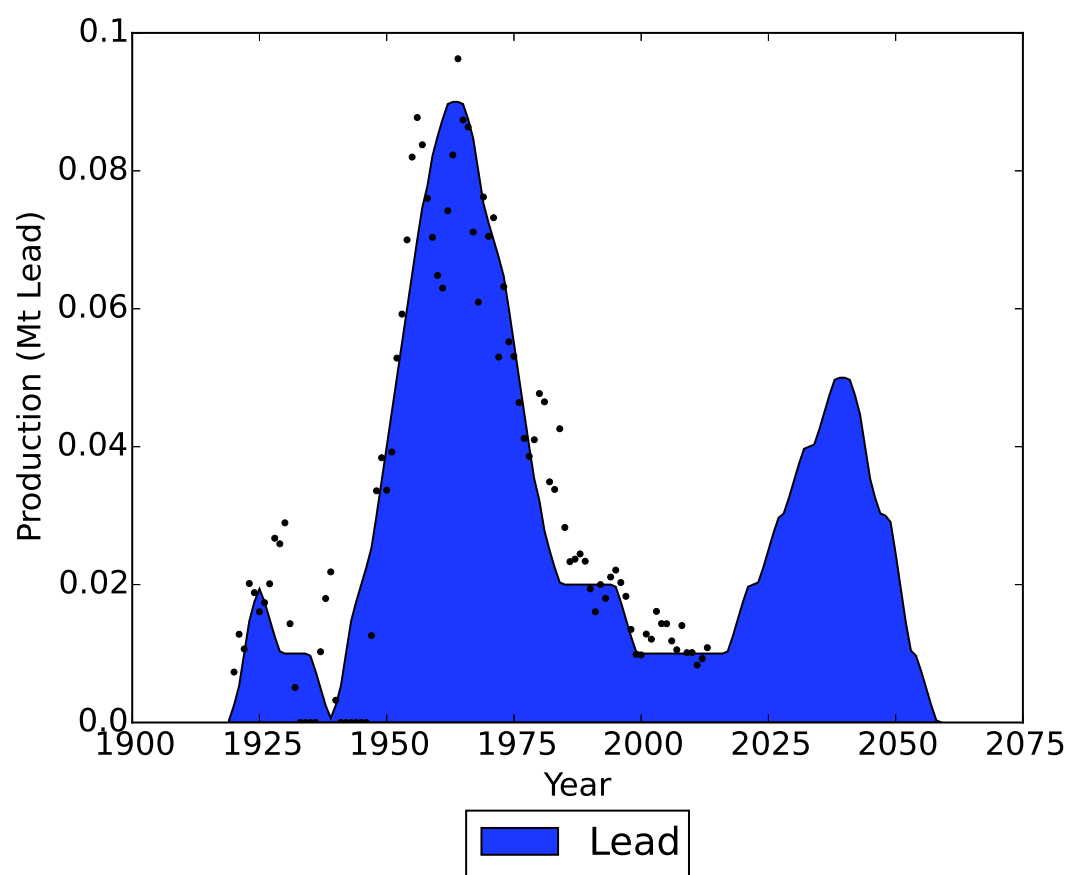

Figure 1.17: Namibia projections capped at 16

| Table 1.17: Peak years - All |      |           |           |
|------------------------------|------|-----------|-----------|
| Name                         | URR  | Peak Year | Peak Rate |
| Lead                         | 4.19 | 1963      | 0.09      |
| Total                        | 4.19 | 1963      | 0.09      |

1.9.2 By Mineral

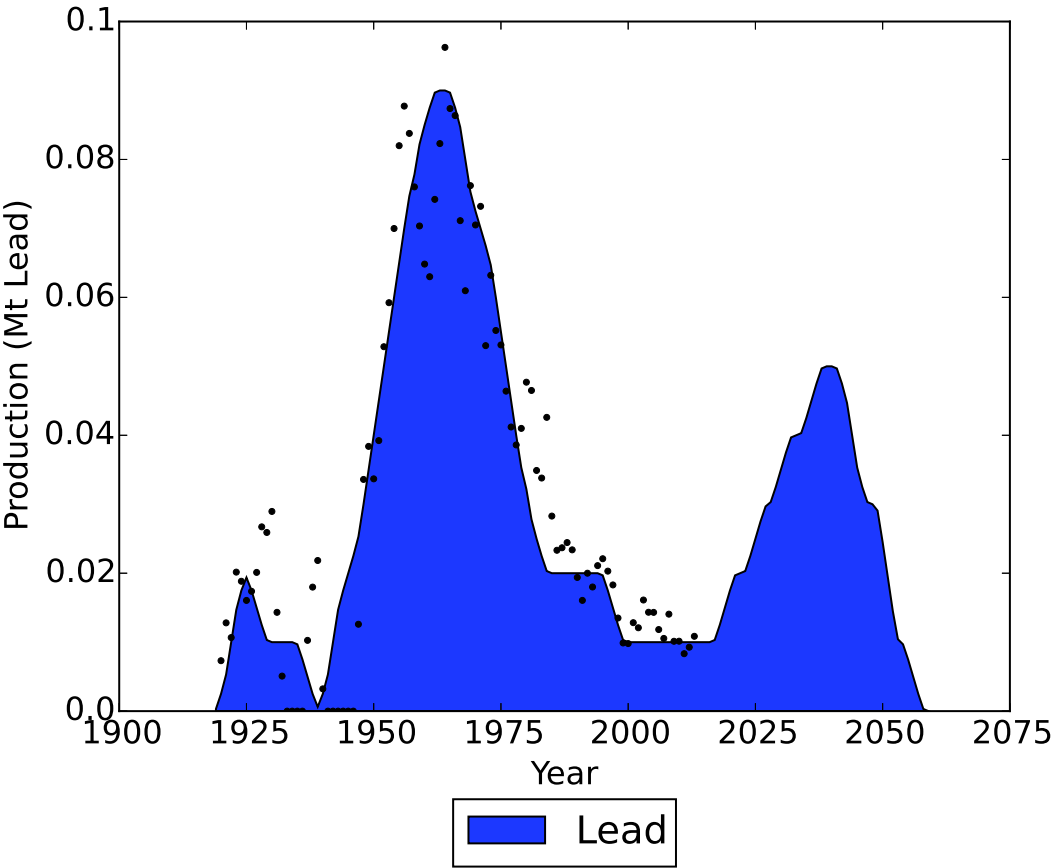

Figure 1.18: Namibia projection by mineral type

| Table 1.18: Peak years - Minerals |             |             |             |
|-----------------------------------|-------------|-------------|-------------|
| Name                              | URR         | Peak Year   | Peak Rate   |
| Lead                              | 4.19        | 1963        | 0.09        |
| <b>Total</b>                      | <b>4.19</b> | <b>1963</b> | <b>0.09</b> |

## 1.10 Nigeria

### 1.10.1 All Projections

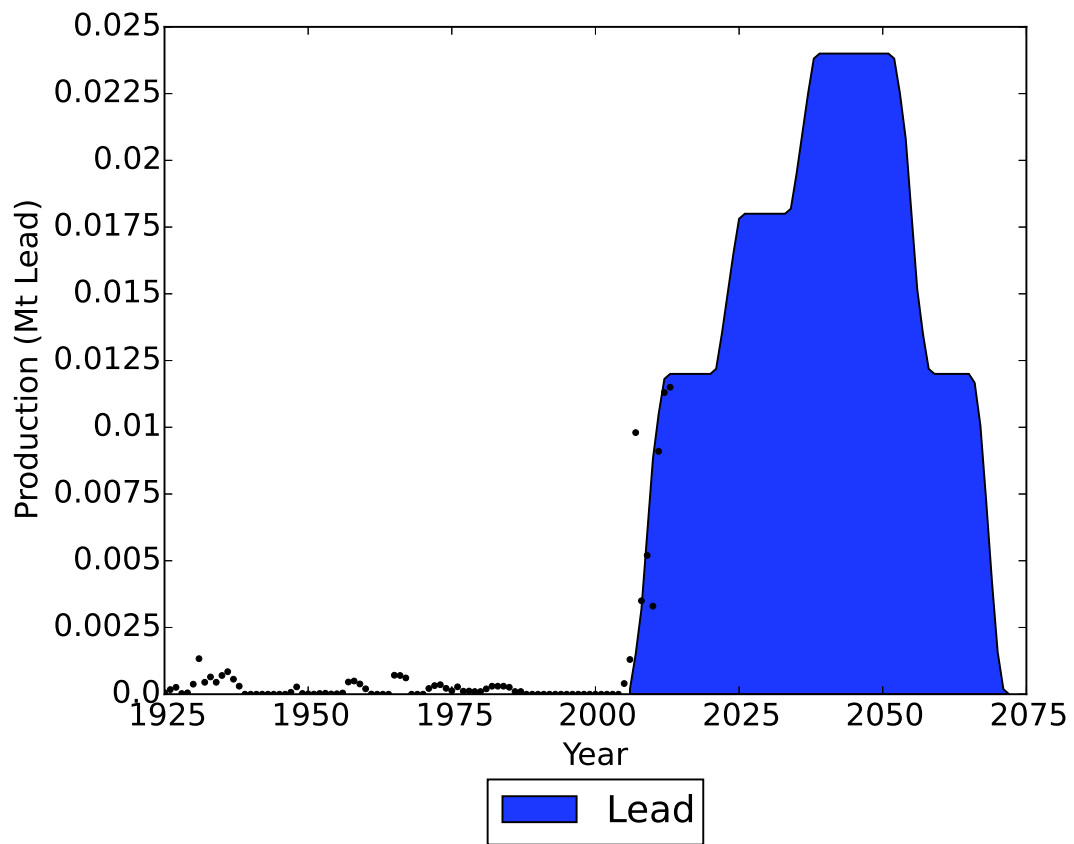

Figure 1.19: Nigeria projections capped at 16

Table 1.19: Peak years - All

| Name         | URR         | Peak Year   | Peak Rate   |
|--------------|-------------|-------------|-------------|
| Lead         | 1.02        | 2039        | 0.02        |
| <b>Total</b> | <b>1.02</b> | <b>2048</b> | <b>0.02</b> |

1.10.2 By Mineral

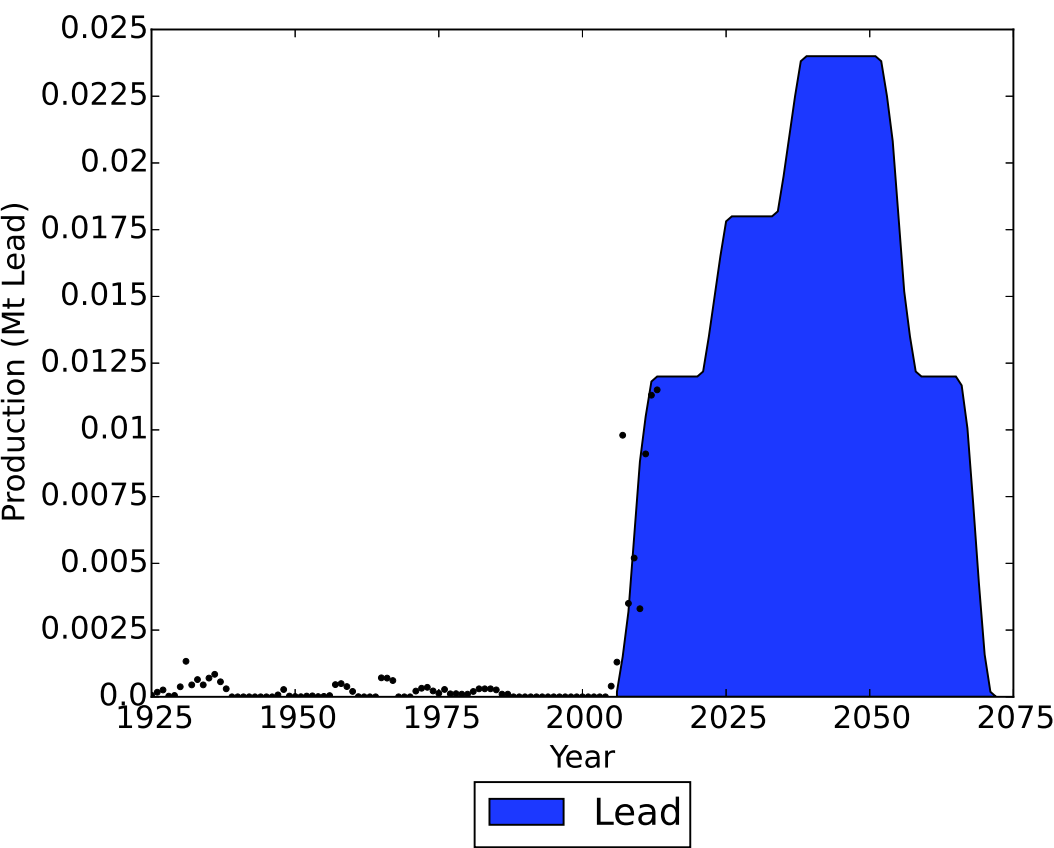

Figure 1.20: Nigeria projection by mineral type

| Table 1.20: Peak years - Minerals |      |           |           |
|-----------------------------------|------|-----------|-----------|
| Name                              | URR  | Peak Year | Peak Rate |
| Lead                              | 1.02 | 2039      | 0.02      |
| Total                             | 1.02 | 2048      | 0.02      |

## 1.11 South Africa

### 1.11.1 All Projections

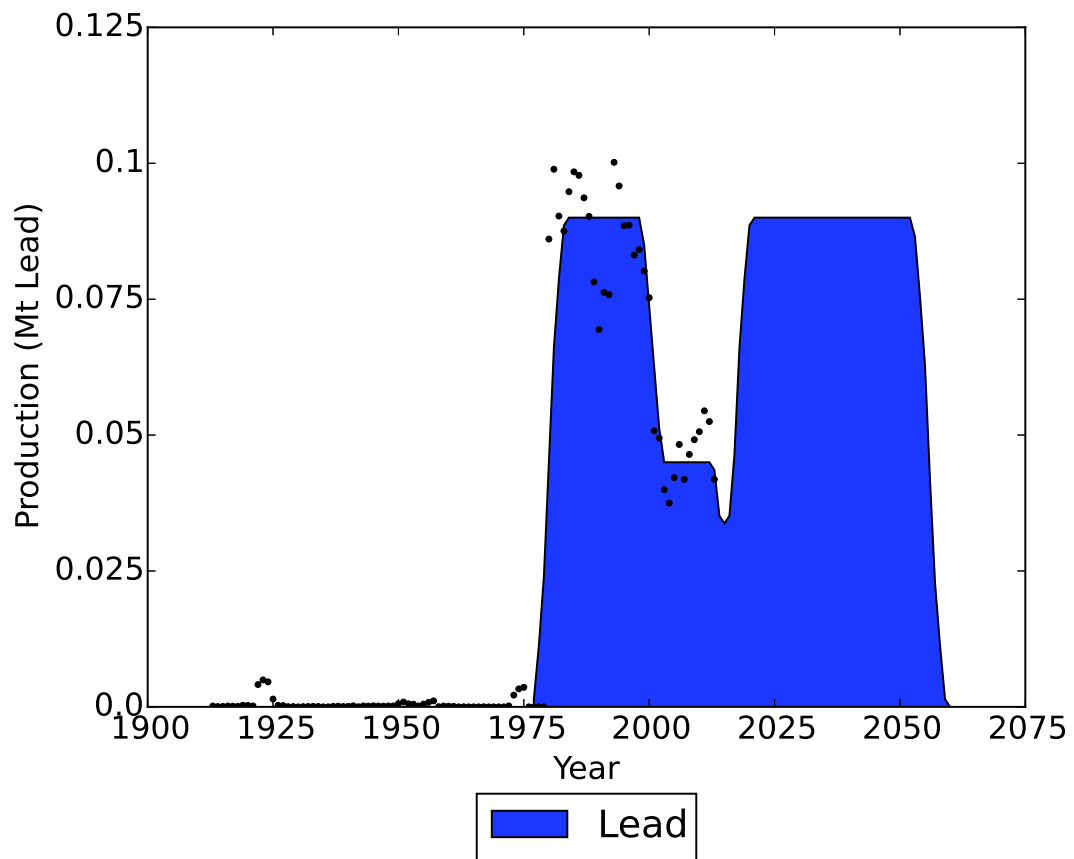

Figure 1.21: South Africa projections capped at 16

| Table 1.21: Peak years - All |            |             |             |
|------------------------------|------------|-------------|-------------|
| Name                         | URR        | Peak Year   | Peak Rate   |
| Lead                         | 6.0        | 2048        | 0.09        |
| <b>Total</b>                 | <b>6.0</b> | <b>2048</b> | <b>0.09</b> |

### 1.11.2 By Mineral

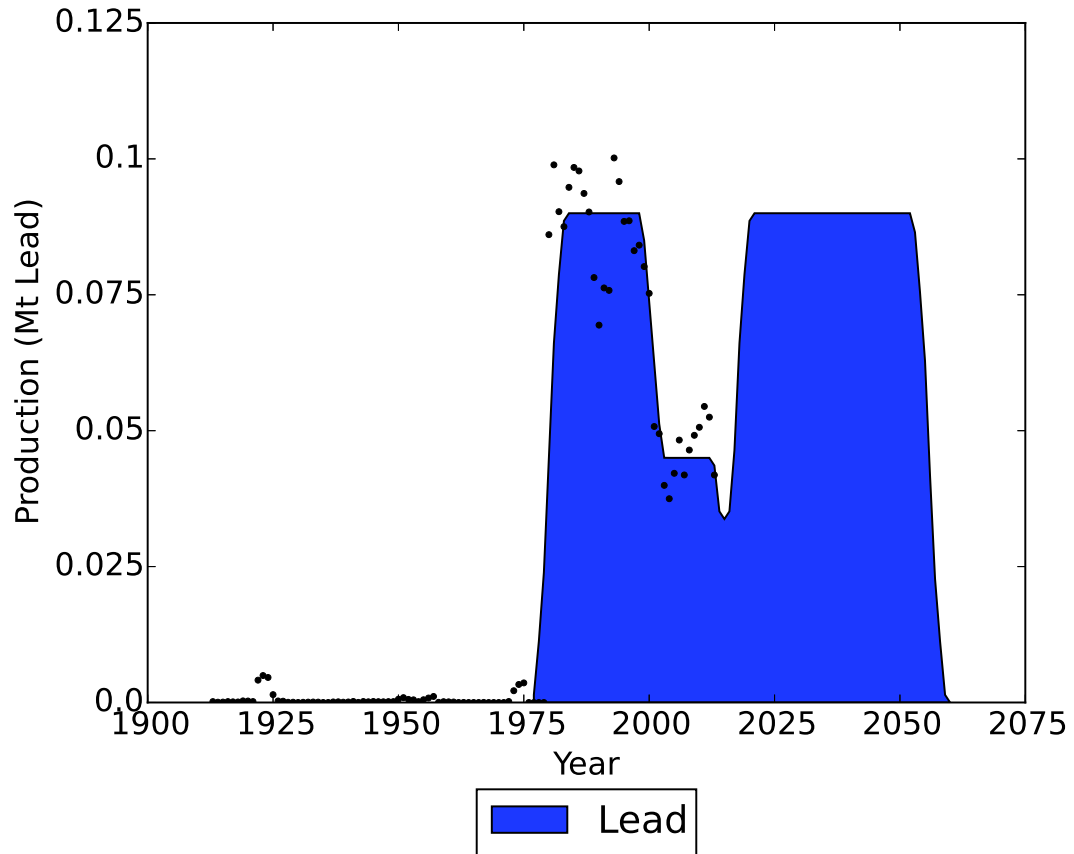

Figure 1.22: South Africa projection by mineral type

| Table 1.22: Peak years - Minerals |            |             |             |
|-----------------------------------|------------|-------------|-------------|
| Name                              | URR        | Peak Year   | Peak Rate   |
| Lead                              | 6.0        | 2048        | 0.09        |
| <b>Total</b>                      | <b>6.0</b> | <b>2048</b> | <b>0.09</b> |



1.12 Tanzania

1.12.1 All Projections

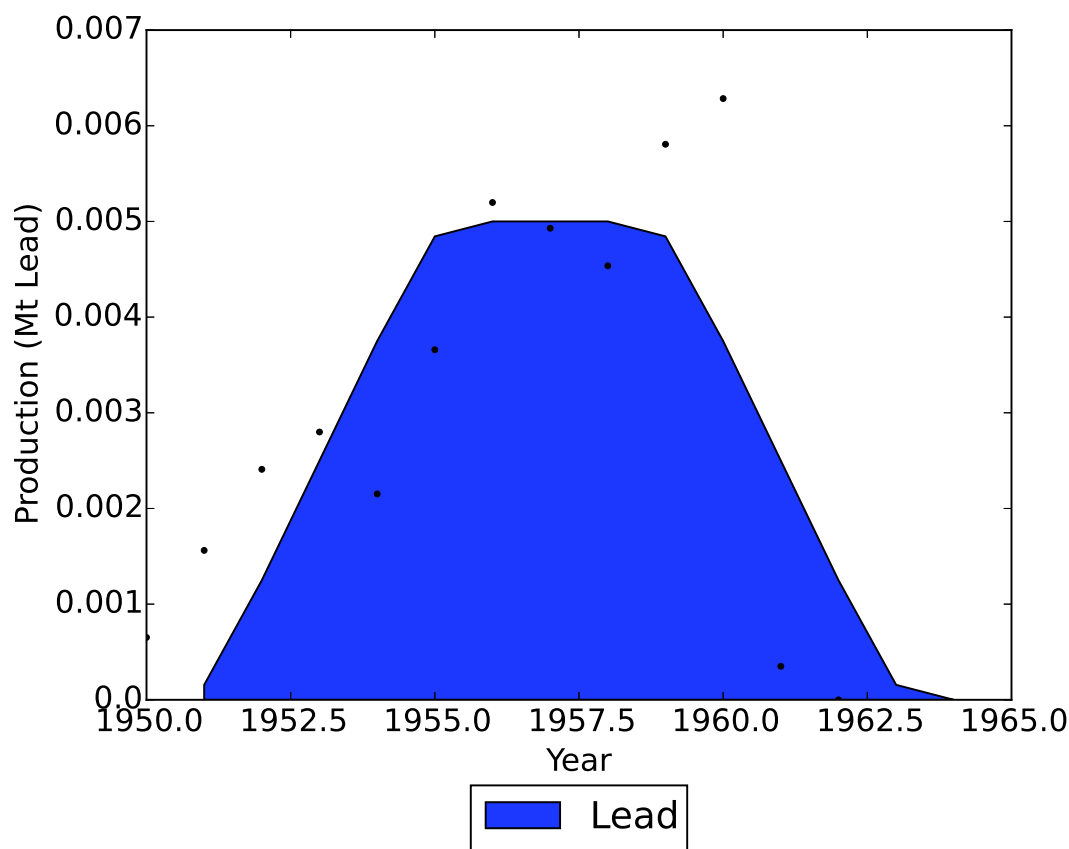

Figure 1.23: Tanzania projections capped at 16

Table 1.23: Peak years - All

| Name         | URR         | Peak Year   | Peak Rate   |
|--------------|-------------|-------------|-------------|
| Lead         | 0.04        | 1956        | 0.01        |
| <b>Total</b> | <b>0.04</b> | <b>1956</b> | <b>0.01</b> |

1.12.2 By Mineral

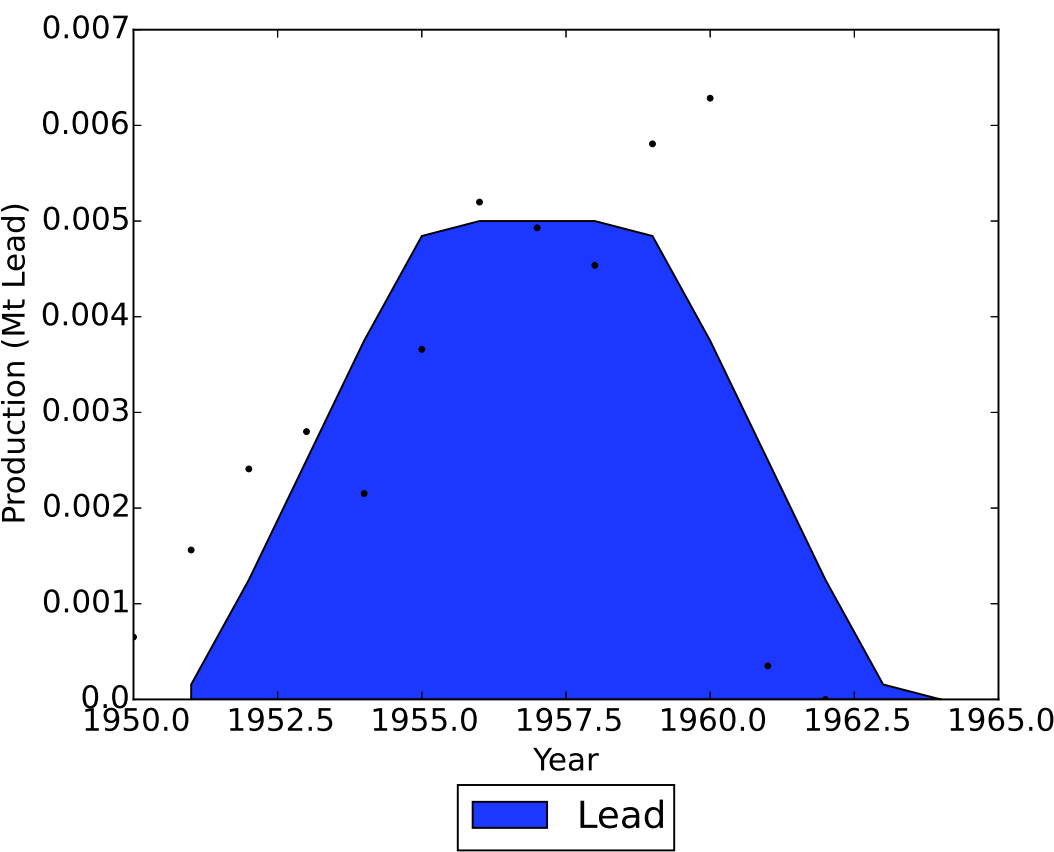

Figure 1.24: Tanzania projection by mineral type

Table 1.24: Peak years - Minerals

| Name  | URR  | Peak Year | Peak Rate |
|-------|------|-----------|-----------|
| Lead  | 0.04 | 1956      | 0.01      |
| Total | 0.04 | 1956      | 0.01      |

1.13 Tunisia

1.13.1 All Projections

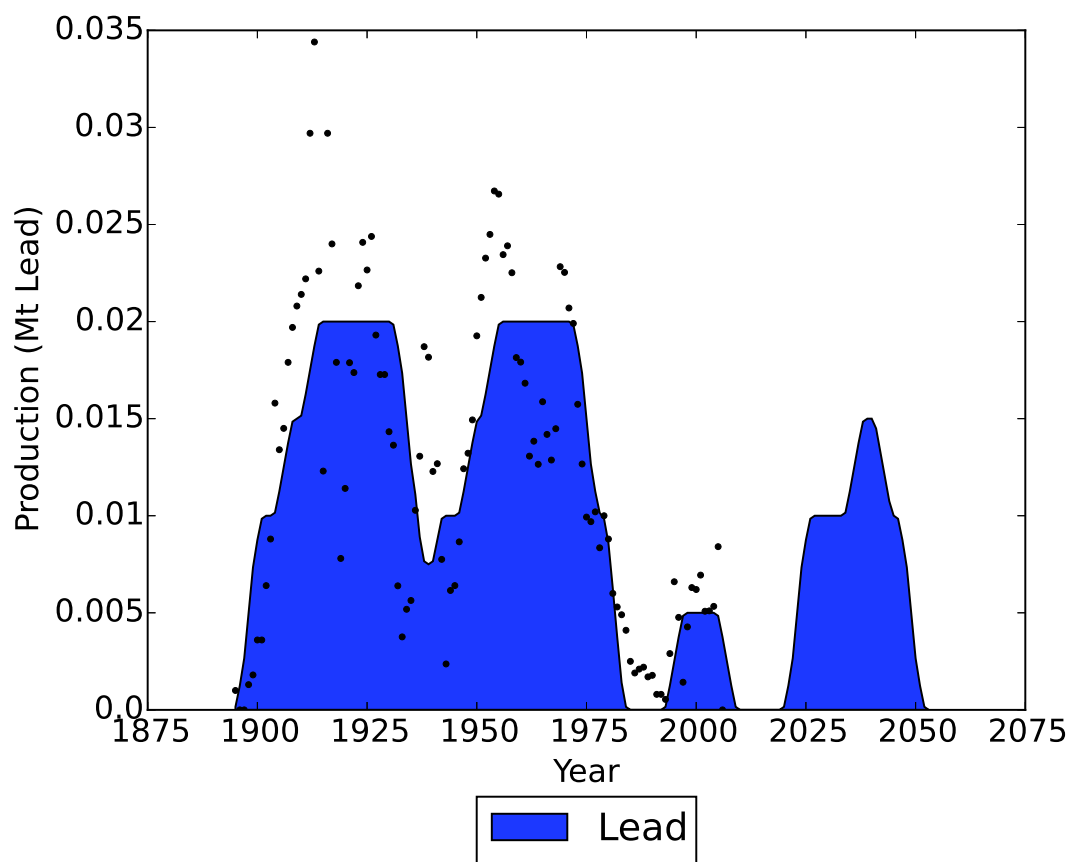

Figure 1.25: Tunisia projections capped at 16

Table 1.25: Peak years - All

| Name  | URR  | Peak Year | Peak Rate |
|-------|------|-----------|-----------|
| Lead  | 1.67 | 1915      | 0.02      |
| Total | 1.67 | 1915      | 0.02      |

1.13.2 By Mineral

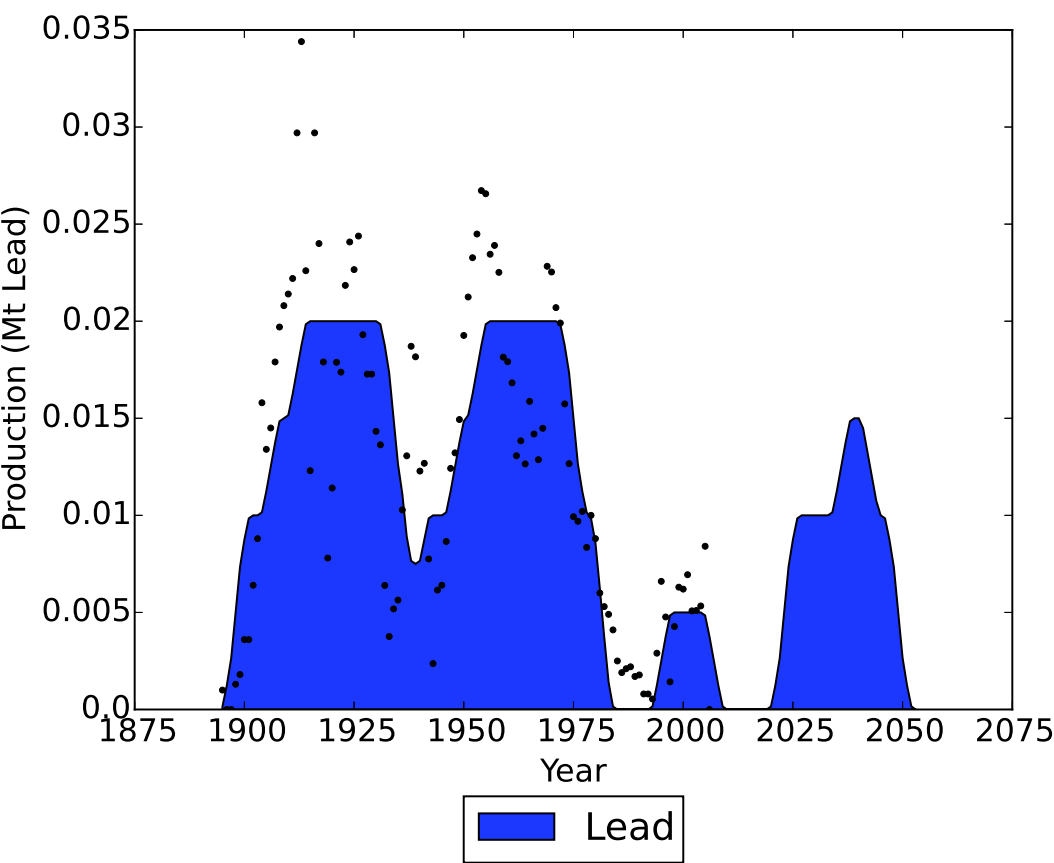

Figure 1.26: Tunisia projection by mineral type

Table 1.26: Peak years - Minerals

| Name  | URR  | Peak Year | Peak Rate |
|-------|------|-----------|-----------|
| Lead  | 1.67 | 1915      | 0.02      |
| Total | 1.67 | 1915      | 0.02      |

## 1.14 Uganda

### 1.14.1 All Projections

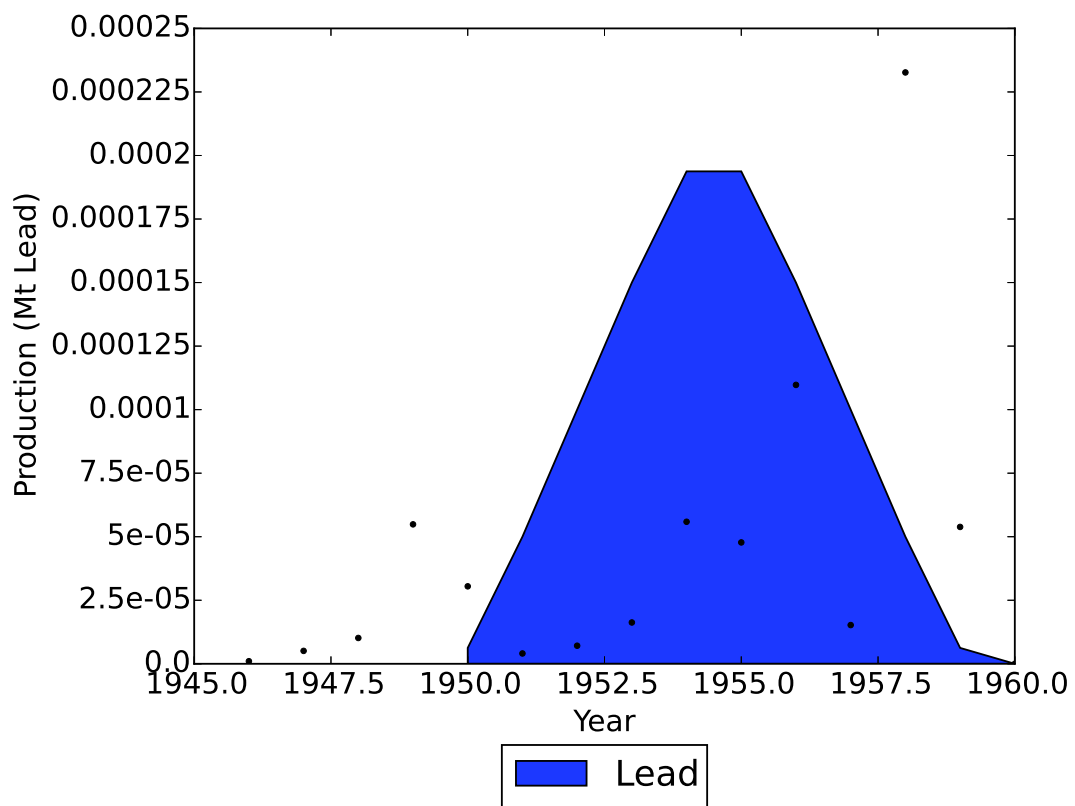

Figure 1.27: Uganda projections capped at 16

Table 1.27: Peak years - All

| Name         | URR | Peak Year   | Peak Rate |
|--------------|-----|-------------|-----------|
| Lead         | –   | 1954        | –         |
| <b>Total</b> | –   | <b>1954</b> | –         |

1.14.2 By Mineral

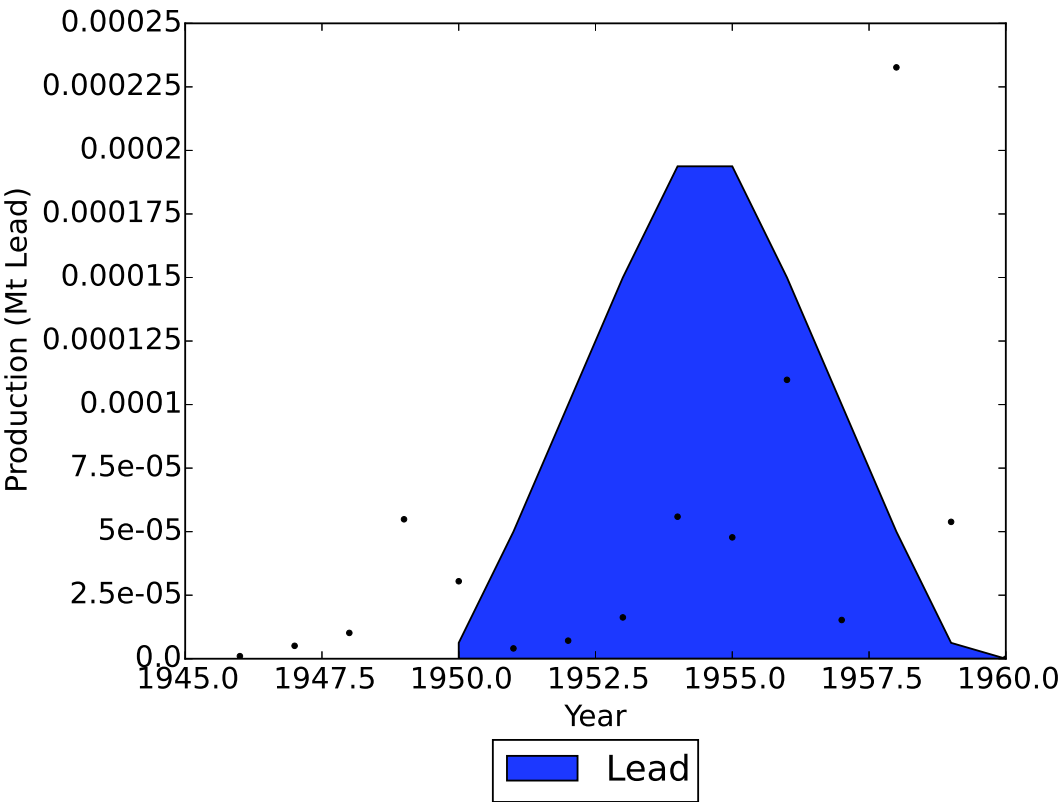

Figure 1.28: Uganda projection by mineral type

| Table 1.28: Peak years - Minerals |     |           |           |
|-----------------------------------|-----|-----------|-----------|
| Name                              | URR | Peak Year | Peak Rate |
| Lead                              | —   | 1954      | —         |
| Total                             | —   | 1954      | —         |

1.15 Zaire

1.15.1 All Projections

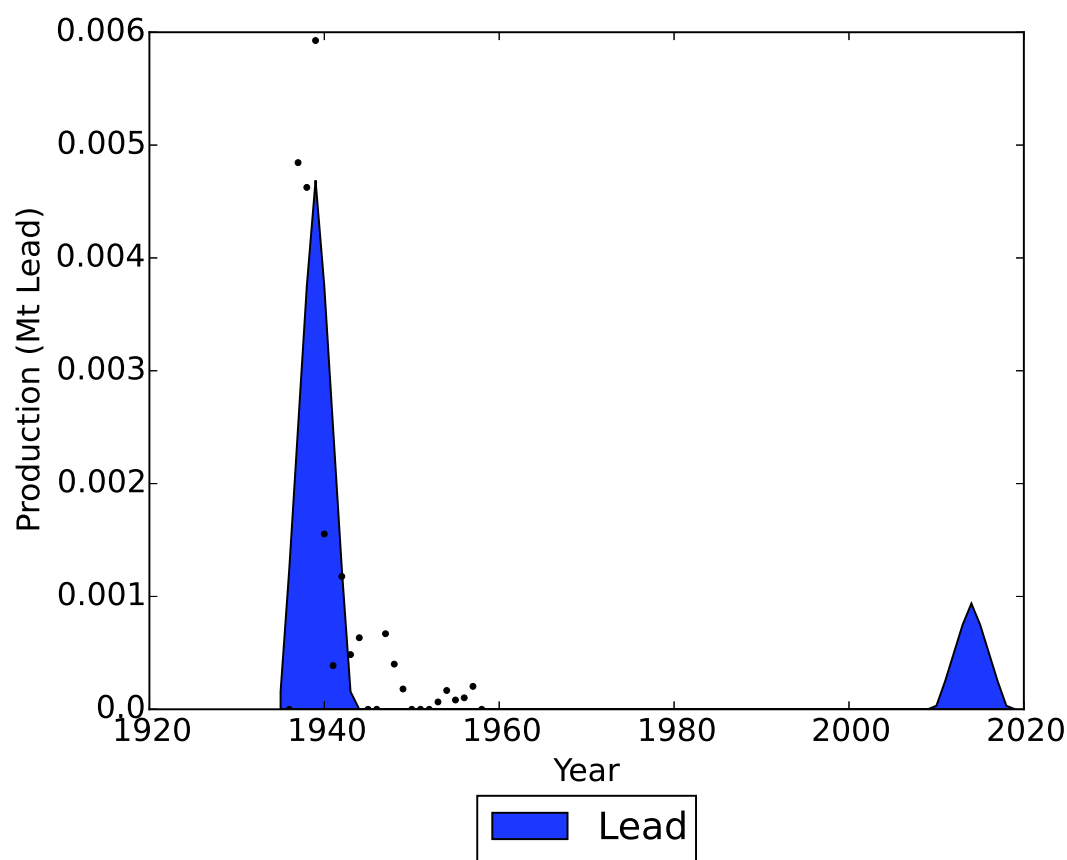

Figure 1.29: Zaire projections capped at 16

| Table 1.29: Peak years - All |      |           |           |
|------------------------------|------|-----------|-----------|
| Name                         | URR  | Peak Year | Peak Rate |
| Lead                         | 0.02 | 1939      | —         |
| Total                        | 0.02 | 1939      | —         |

1.15.2 By Mineral

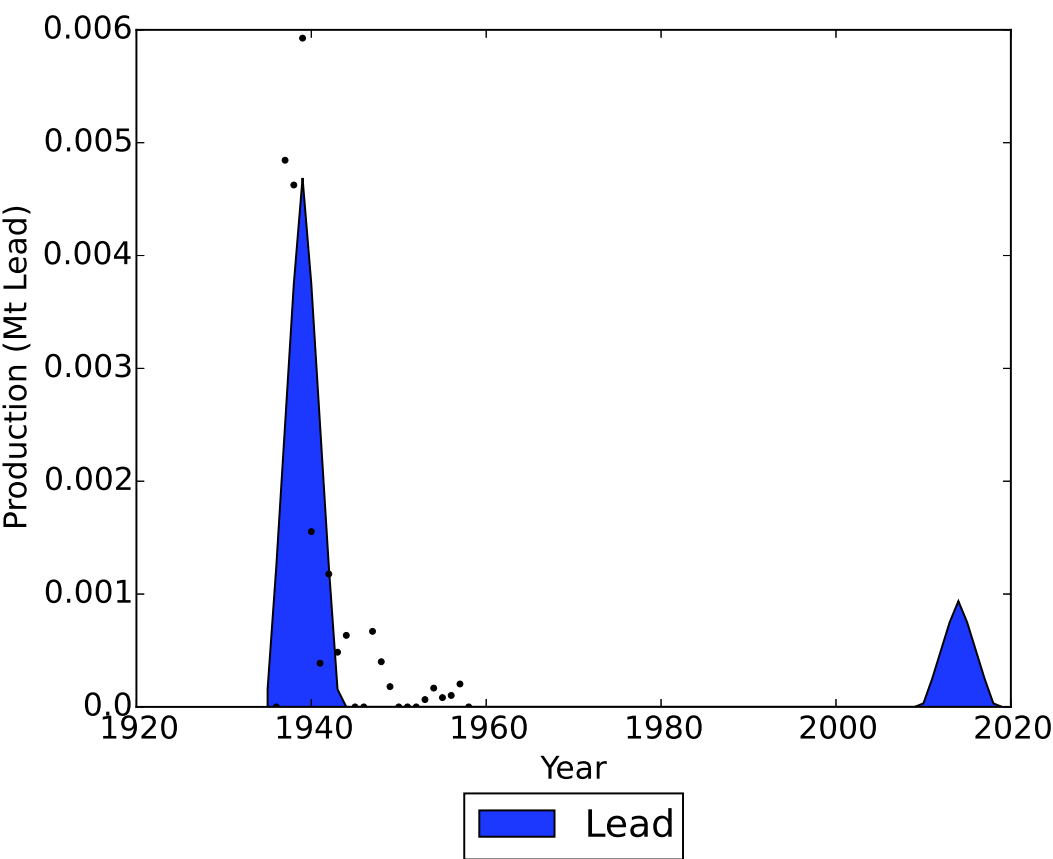

Figure 1.30: Zaire projection by mineral type

| Table 1.30: Peak years - Minerals |      |           |           |
|-----------------------------------|------|-----------|-----------|
| Name                              | URR  | Peak Year | Peak Rate |
| Lead                              | 0.02 | 1939      | —         |
| Total                             | 0.02 | 1939      | —         |



1.16 Zambia

1.16.1 All Projections

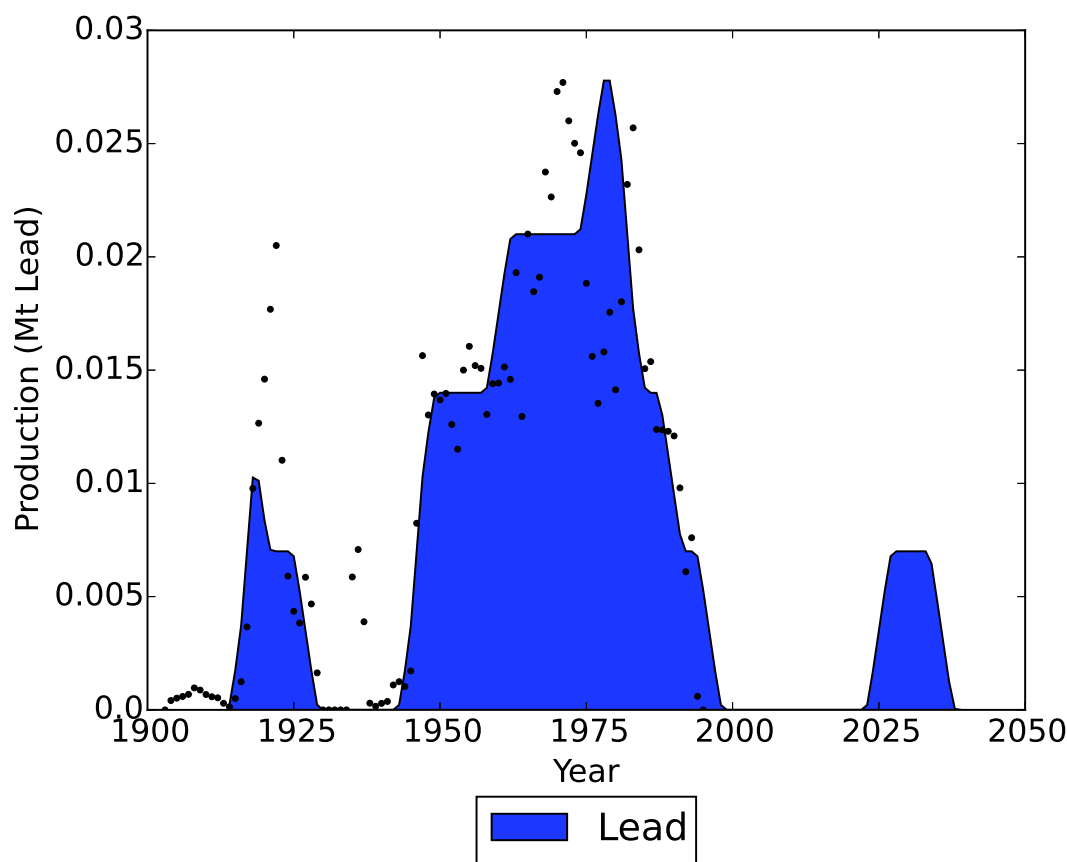

Figure 1.31: Zambia projections capped at 16

| Table 1.31: Peak years - All |      |           |           |
|------------------------------|------|-----------|-----------|
| Name                         | URR  | Peak Year | Peak Rate |
| Lead                         | 1.01 | 1978      | 0.03      |
| Total                        | 1.01 | 1978      | 0.03      |

1.16.2 By Mineral

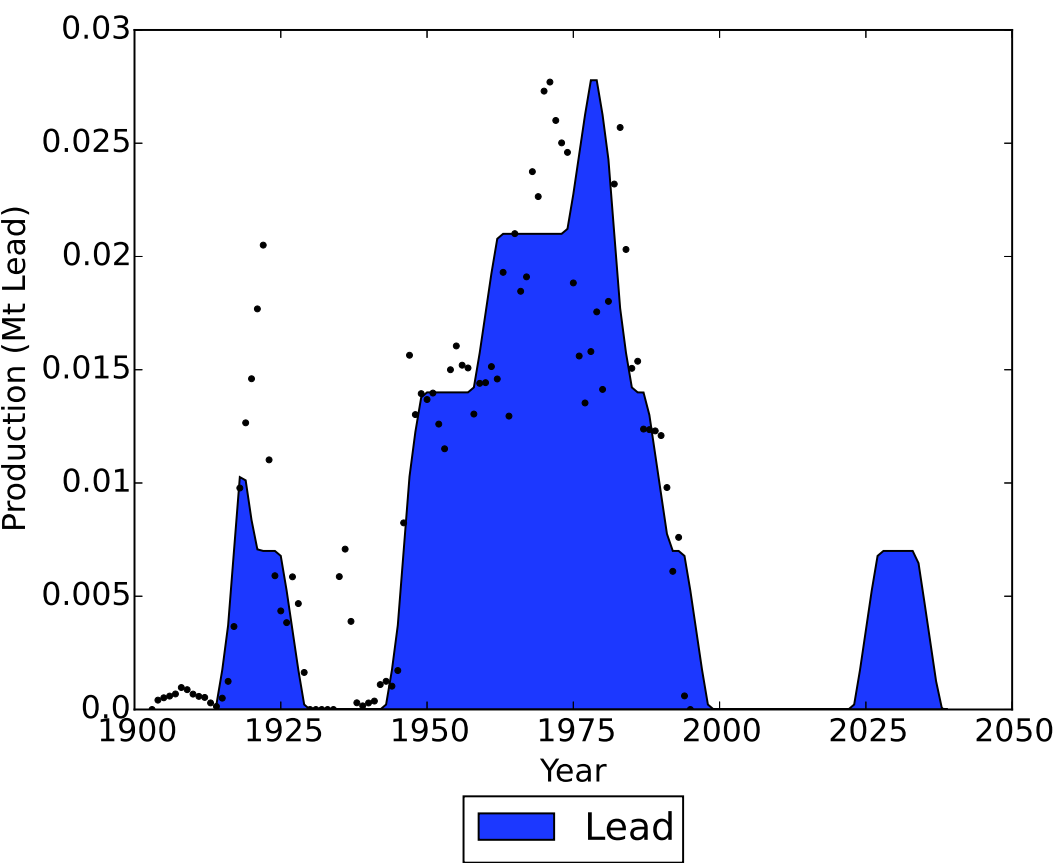

Figure 1.32: Zambia projection by mineral type

| Table 1.32: Peak years - Minerals |      |           |           |
|-----------------------------------|------|-----------|-----------|
| Name                              | URR  | Peak Year | Peak Rate |
| Lead                              | 1.01 | 1978      | 0.03      |
| Total                             | 1.01 | 1978      | 0.03      |

1.17 Zimbabwe

1.17.1 All Projections

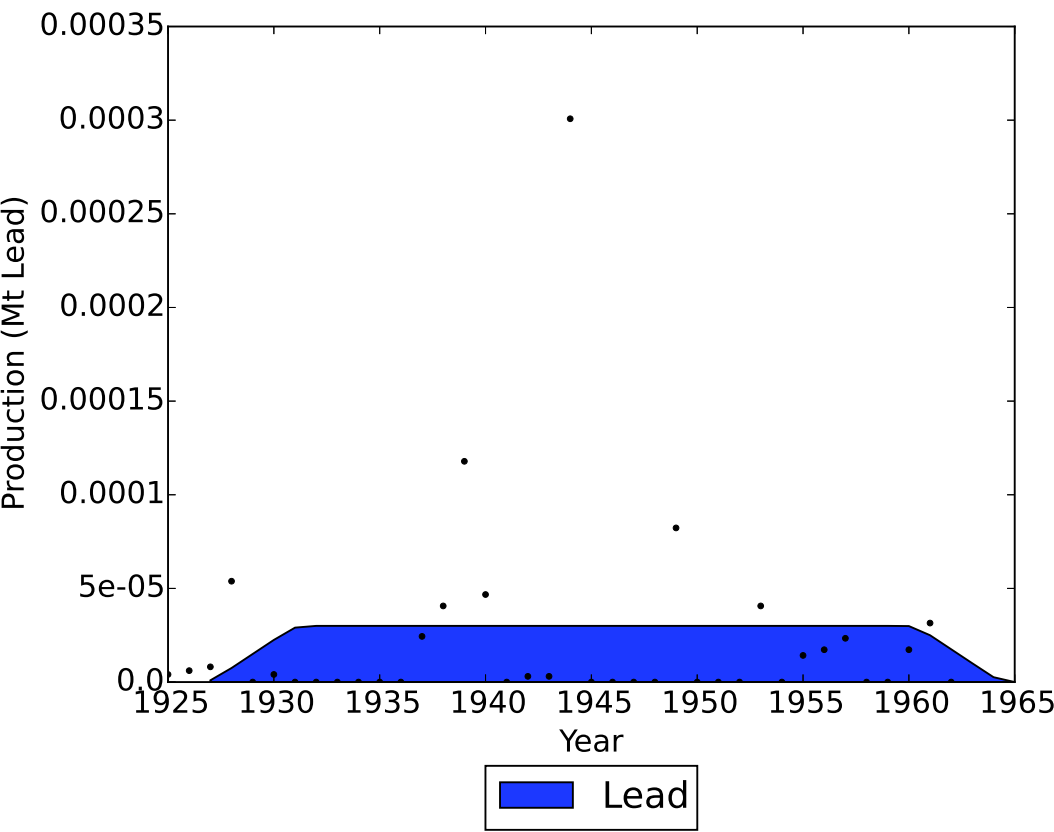

Figure 1.33: Zimbabwe projections capped at 16

| Table 1.33: Peak years - All |     |           |           |
|------------------------------|-----|-----------|-----------|
| Name                         | URR | Peak Year | Peak Rate |
| Lead                         | —   | 1932      | —         |
| Total                        | —   | 1932      | —         |

1.17.2 By Mineral

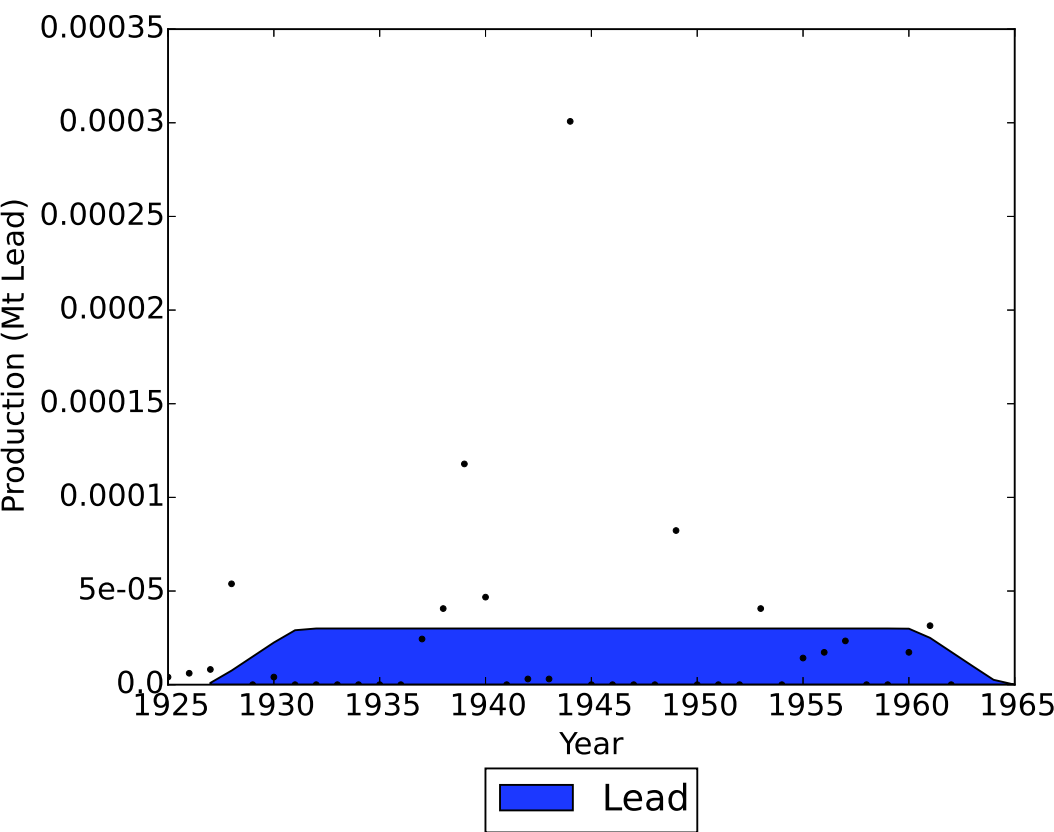

Figure 1.34: Zimbabwe projection by mineral type

Table 1.34: Peak years - Minerals

| Name         | URR | Peak Year   | Peak Rate |
|--------------|-----|-------------|-----------|
| Lead         | –   | 1932        | –         |
| <b>Total</b> | –   | <b>1932</b> | –         |

1.18 Total

1.18.1 By country

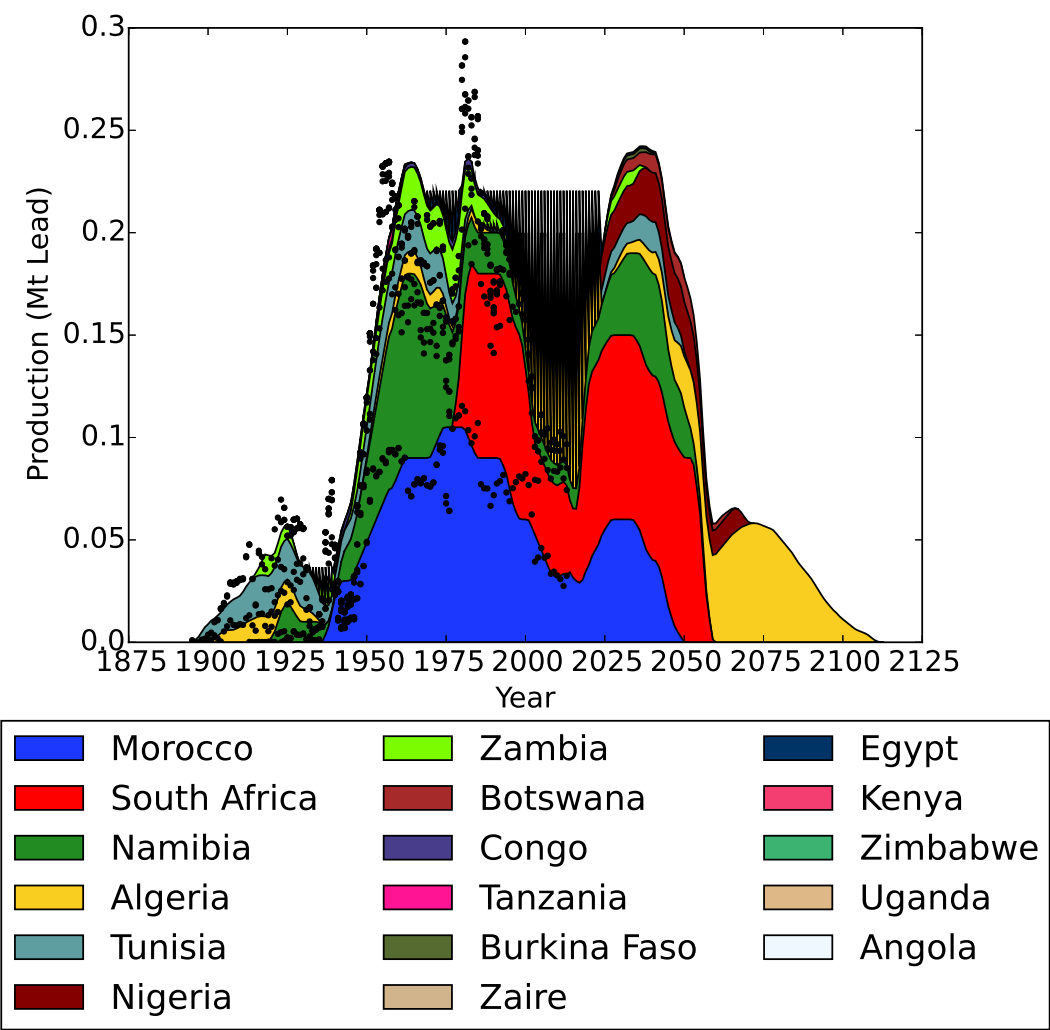

Figure 1.35: Africa projections by country

1.18.2 By mineral

Table 1.35: Peak years - All

| Name         | URR          | Peak Year   | Peak Rate   |
|--------------|--------------|-------------|-------------|
| Morocco      | 6.69         | 1975        | 0.11        |
| South Africa | 6.0          | 2048        | 0.09        |
| Namibia      | 4.19         | 1963        | 0.09        |
| Algeria      | 2.84         | 2072        | 0.06        |
| Tunisia      | 1.67         | 1915        | 0.02        |
| Nigeria      | 1.02         | 2039        | 0.02        |
| Zambia       | 1.01         | 1978        | 0.03        |
| Botswana     | 0.26         | 2050        | 0.01        |
| Congo        | 0.14         | 1942        | —           |
| Tanzania     | 0.04         | 1956        | 0.01        |
| Burkina Faso | 0.03         | 2030        | —           |
| Zaire        | 0.02         | 1939        | —           |
| Egypt        | 0.02         | 2030        | —           |
| Kenya        | —            | 1990        | —           |
| Zimbabwe     | —            | 1932        | —           |
| Uganda       | —            | 1954        | —           |
| Angola       | —            | 1957        | —           |
| <b>Total</b> | <b>23.93</b> | <b>2037</b> | <b>0.24</b> |

Table 1.36: Peak years - Minerals

| Name         | URR          | Peak Year   | Peak Rate   |
|--------------|--------------|-------------|-------------|
| Lead Lead    | 23.93        | 2037        | 0.24        |
| <b>Total</b> | <b>23.93</b> | <b>2037</b> | <b>0.24</b> |

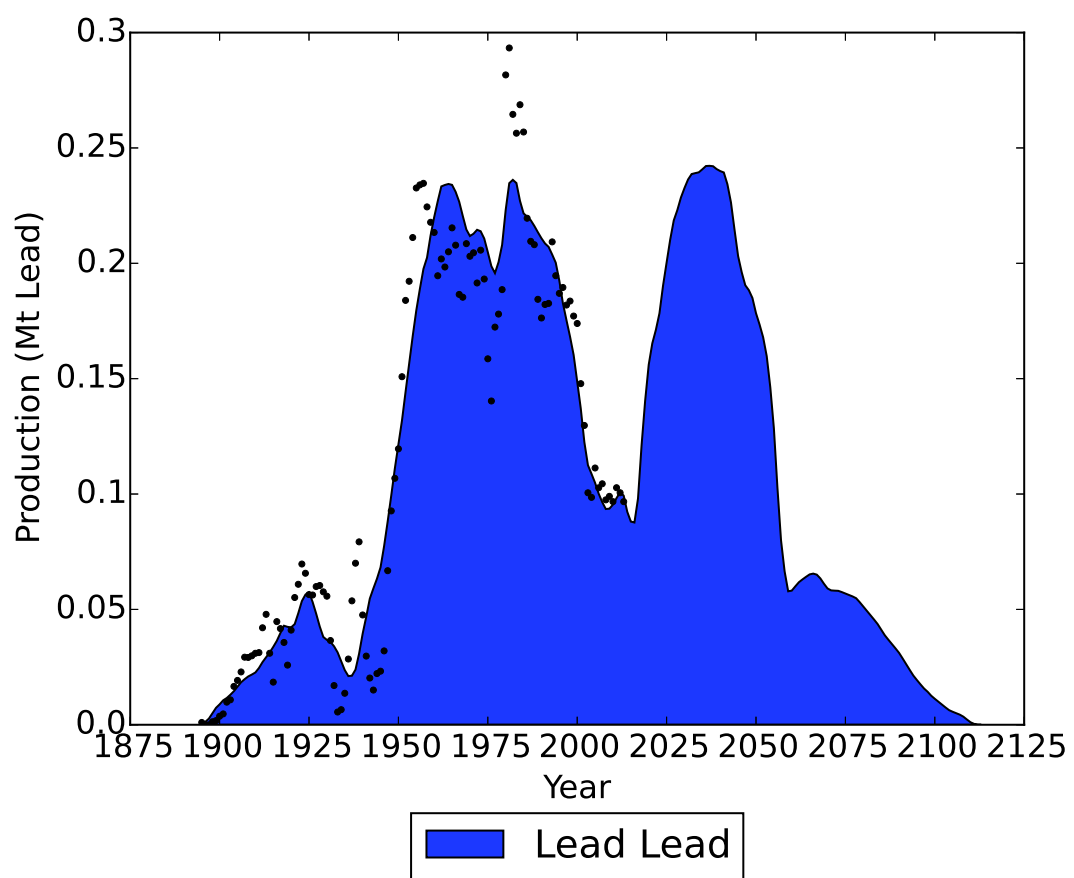

Figure 1.36: Africa projection by mineral type

# Chapter 2

## Asia

### 2.1 Australia

#### 2.1.1 All Projections

Table 2.1: Peak years - All

| Name  | URR    | Peak Year | Peak Rate |
|-------|--------|-----------|-----------|
| Lead  | 102.23 | 2028      | 0.7       |
| Total | 102.23 | 2028      | 0.7       |



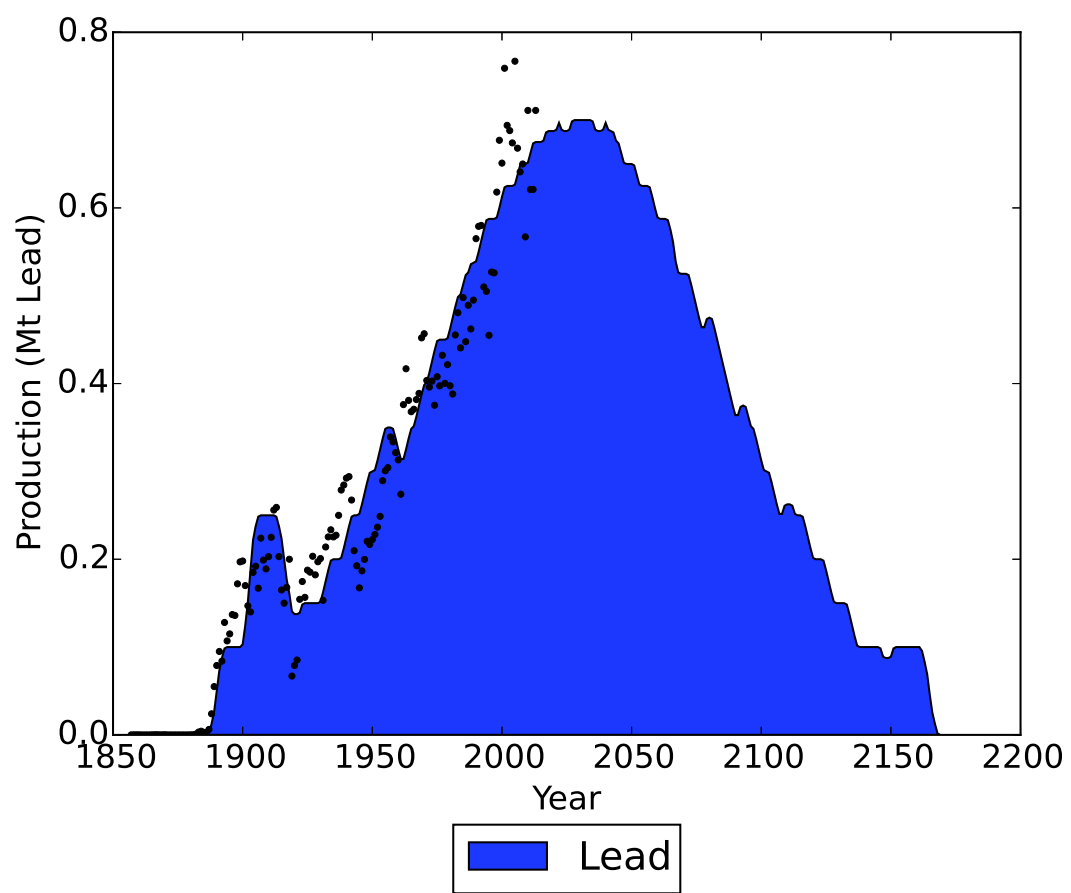

Figure 2.1: Australia projections capped at 16

2.1.2 By Mineral

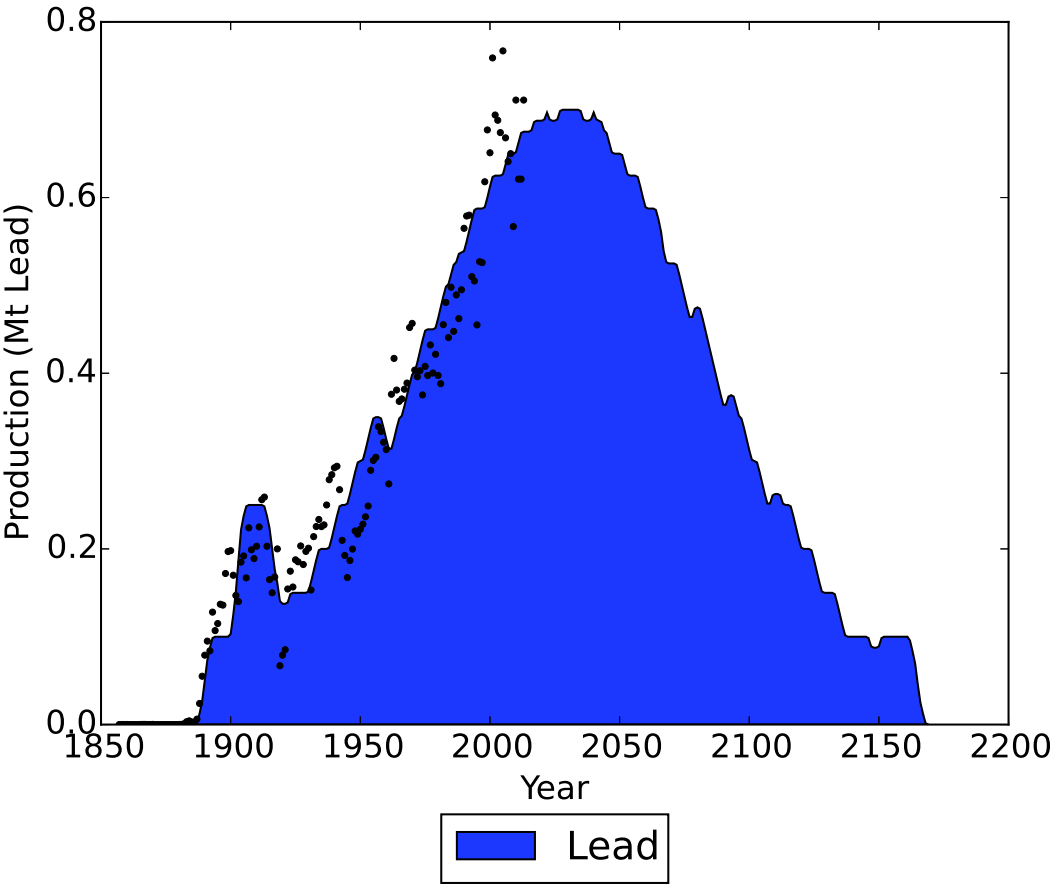

Figure 2.2: Australia projection by mineral type

| Table 2.2: Peak years - Minerals |               |             |            |
|----------------------------------|---------------|-------------|------------|
| Name                             | URR           | Peak Year   | Peak Rate  |
| Lead                             | 102.23        | 2028        | 0.7        |
| <b>Total</b>                     | <b>102.23</b> | <b>2028</b> | <b>0.7</b> |

## 2.2 Burma

### 2.2.1 All Projections

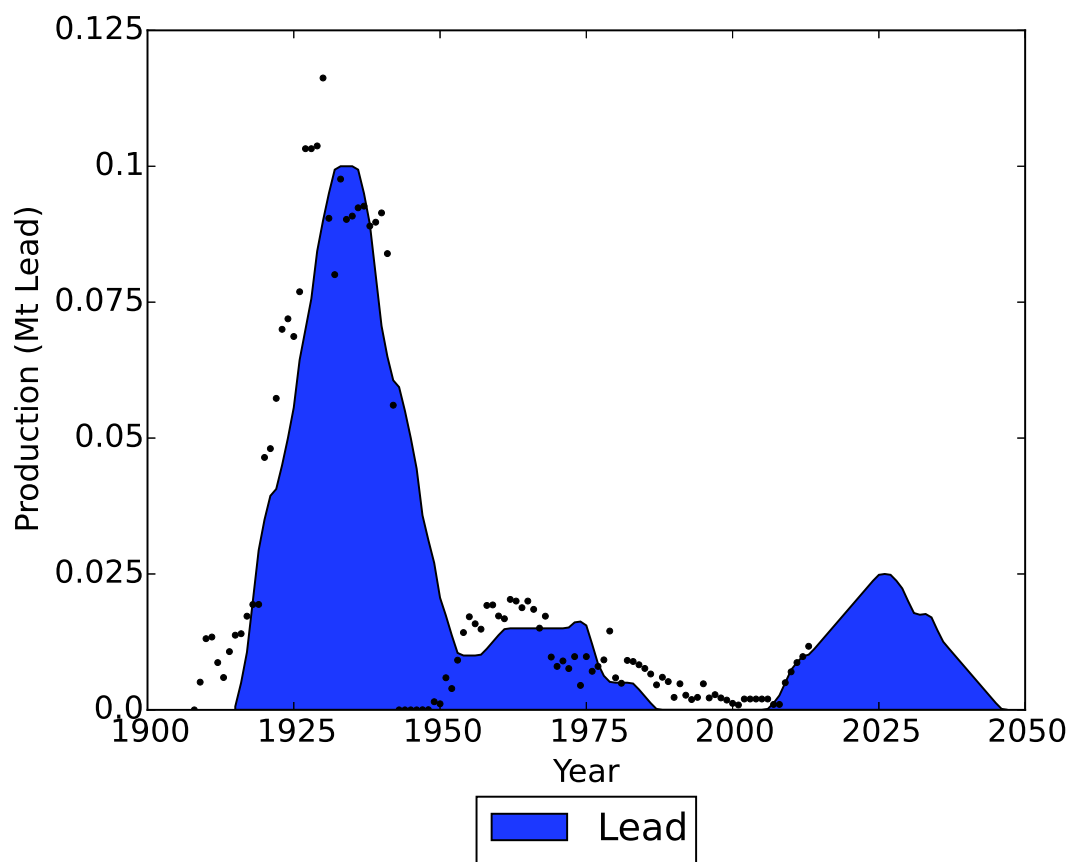

Figure 2.3: Burma projections capped at 16

| Table 2.3: Peak years - All |      |           |           |
|-----------------------------|------|-----------|-----------|
| Name                        | URR  | Peak Year | Peak Rate |
| Lead                        | 3.03 | 1933      | 0.1       |
| Total                       | 3.03 | 1933      | 0.1       |

2.2.2 By Mineral

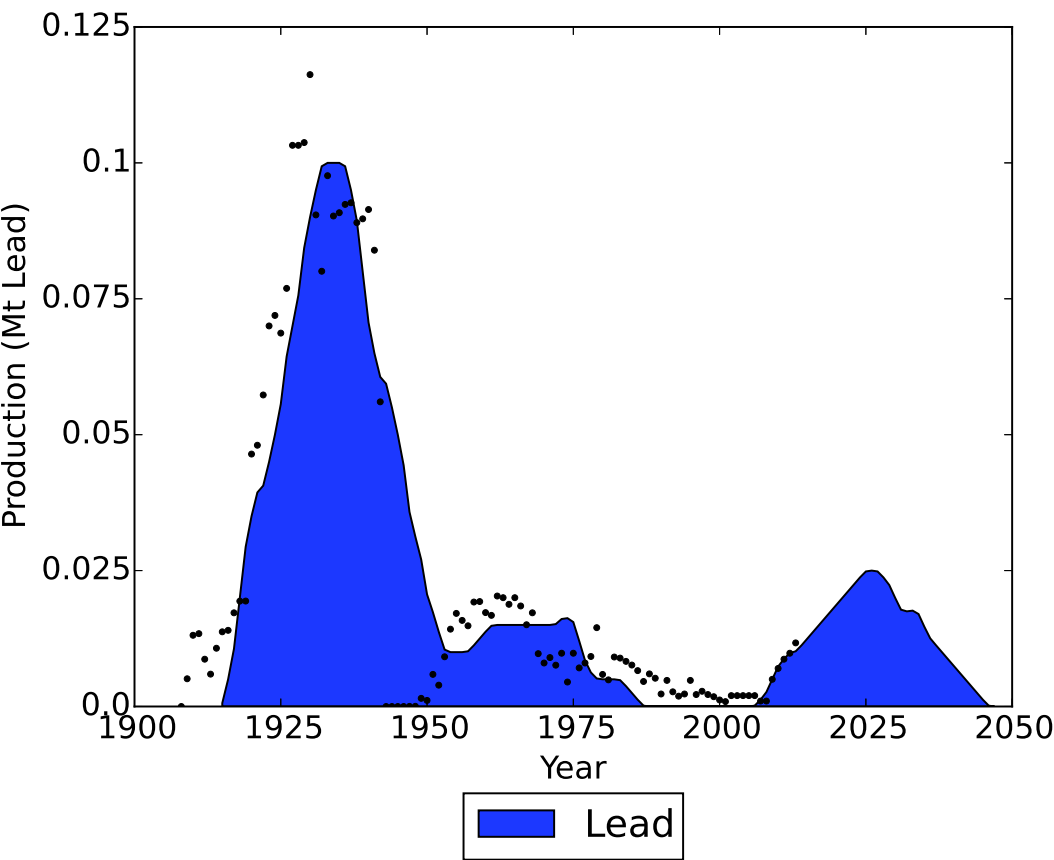

Figure 2.4: Burma projection by mineral type

| Table 2.4: Peak years - Minerals |      |           |           |
|----------------------------------|------|-----------|-----------|
| Name                             | URR  | Peak Year | Peak Rate |
| Lead                             | 3.03 | 1933      | 0.1       |
| Total                            | 3.03 | 1933      | 0.1       |

2.3 China

2.3.1 All Projections

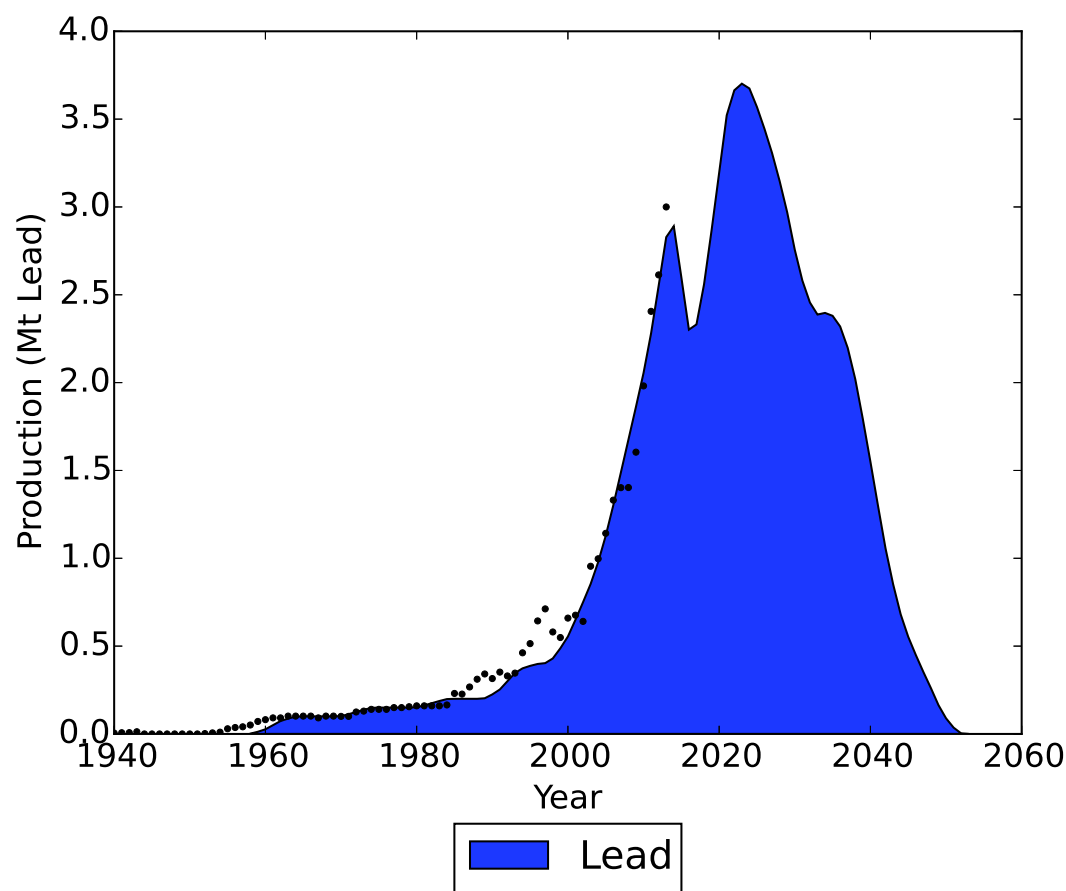

Figure 2.5: China projections capped at 16

| Table 2.5: Peak years - All |        |           |           |
|-----------------------------|--------|-----------|-----------|
| Name                        | URR    | Peak Year | Peak Rate |
| Lead                        | 109.04 | 2023      | 3.7       |
| Total                       | 109.04 | 2023      | 3.7       |

2.3.2 By Mineral

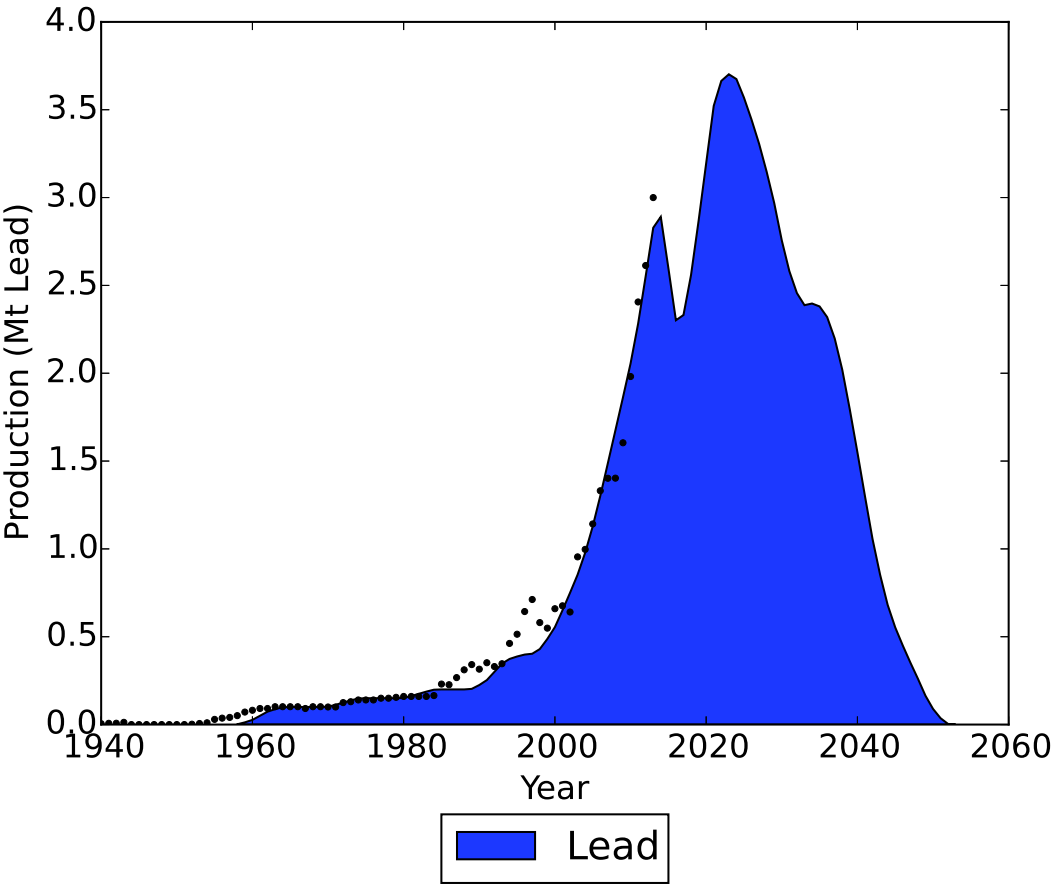

Figure 2.6: China projection by mineral type

| Table 2.6: Peak years - Minerals |        |           |           |
|----------------------------------|--------|-----------|-----------|
| Name                             | URR    | Peak Year | Peak Rate |
| Lead                             | 109.04 | 2023      | 3.7       |
| Total                            | 109.04 | 2023      | 3.7       |

## 2.4 Hong Kong

### 2.4.1 All Projections

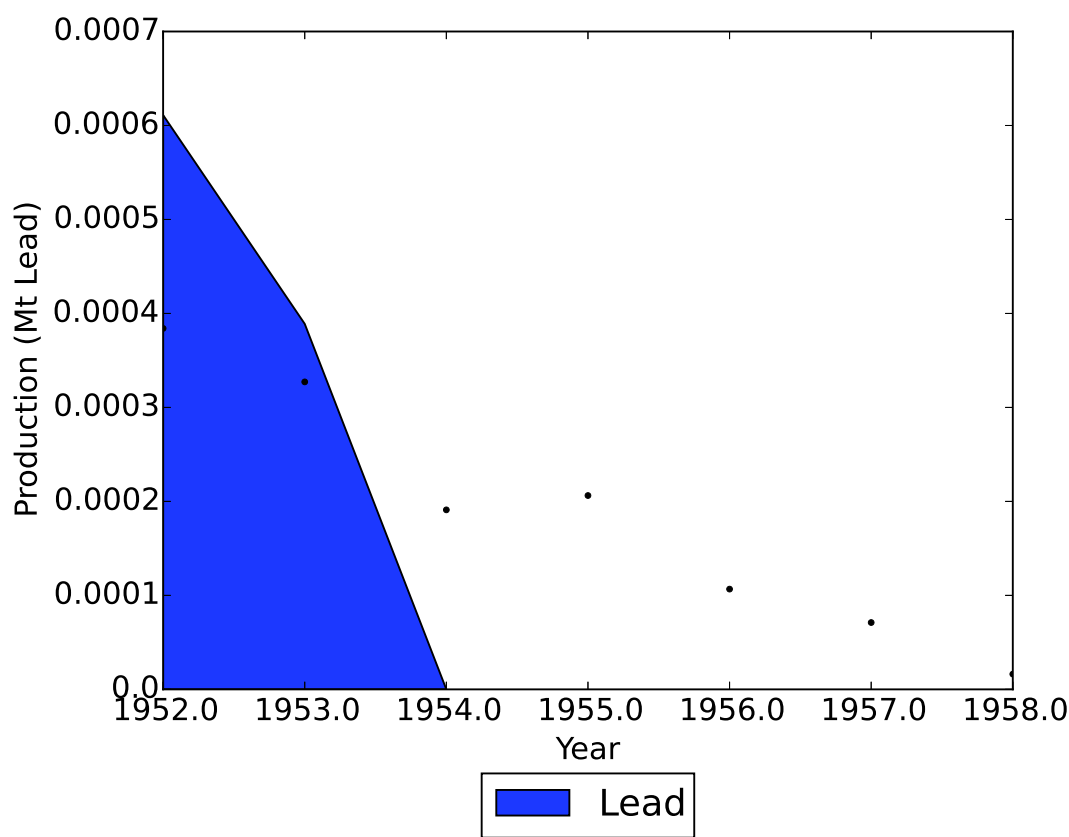

Figure 2.7: Hong Kong projections capped at 16

Table 2.7: Peak years - All

| Name  | URR | Peak Year | Peak Rate |
|-------|-----|-----------|-----------|
| Lead  | –   | 1952      | –         |
| Total | –   | 1952      | –         |

2.4.2 By Mineral

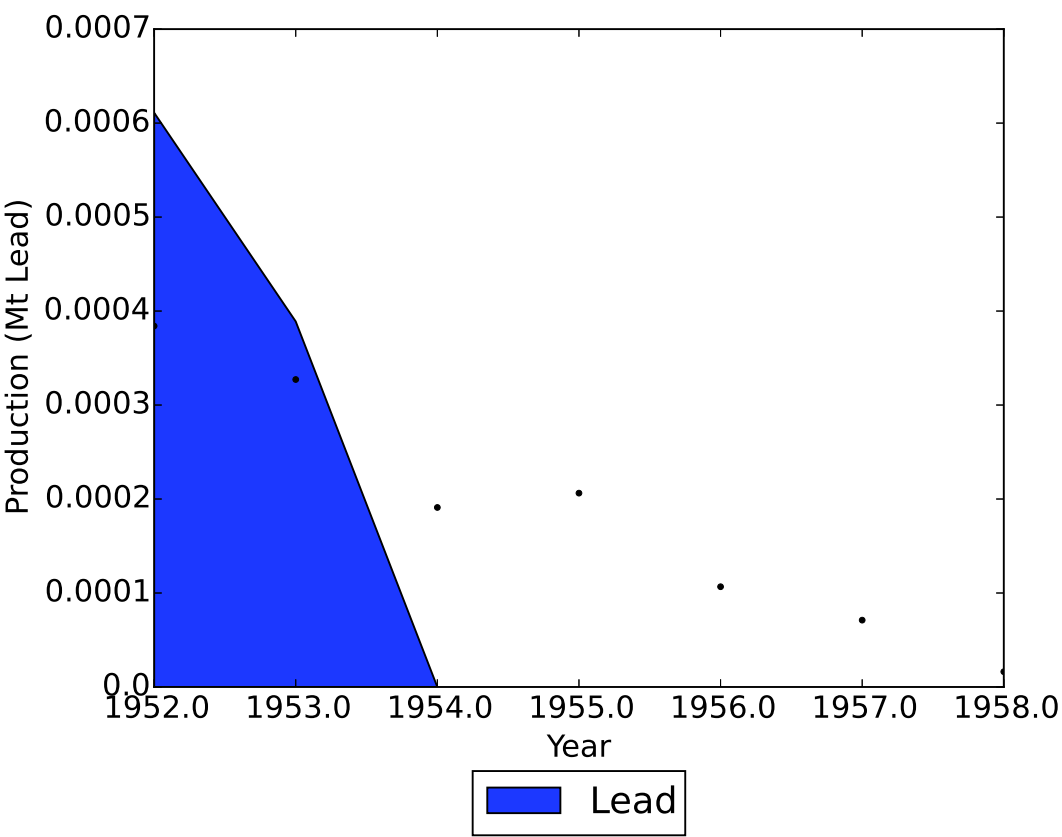

Figure 2.8: Hong Kong projection by mineral type

| Table 2.8: Peak years - Minerals |     |           |           |
|----------------------------------|-----|-----------|-----------|
| Name                             | URR | Peak Year | Peak Rate |
| Lead                             | –   | 1952      | –         |
| Total                            | –   | 1952      | –         |



# 2.5 India

## 2.5.1 All Projections

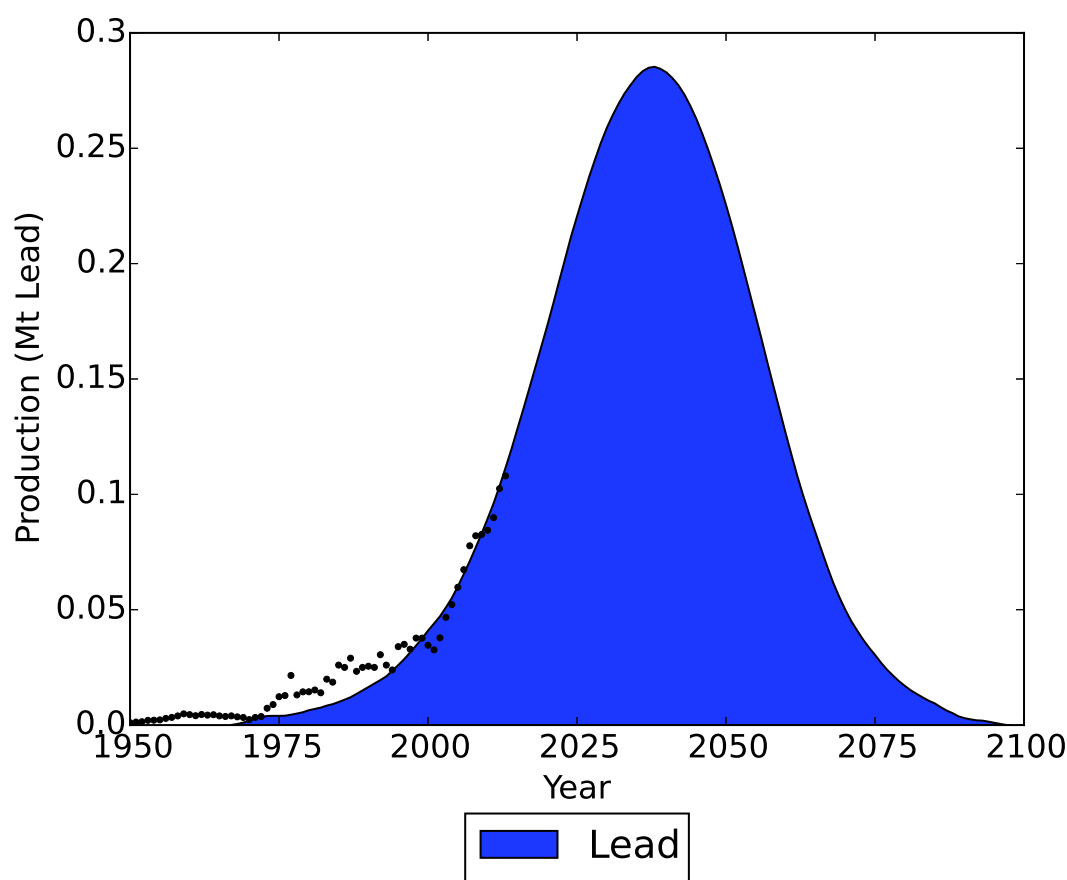

Figure 2.9: India projections capped at 16

| Table 2.9: Peak years - All |       |           |           |
|-----------------------------|-------|-----------|-----------|
| Name                        | URR   | Peak Year | Peak Rate |
| Lead                        | 12.93 | 2038      | 0.29      |
| Total                       | 12.93 | 2038      | 0.29      |

2.5.2 By Mineral

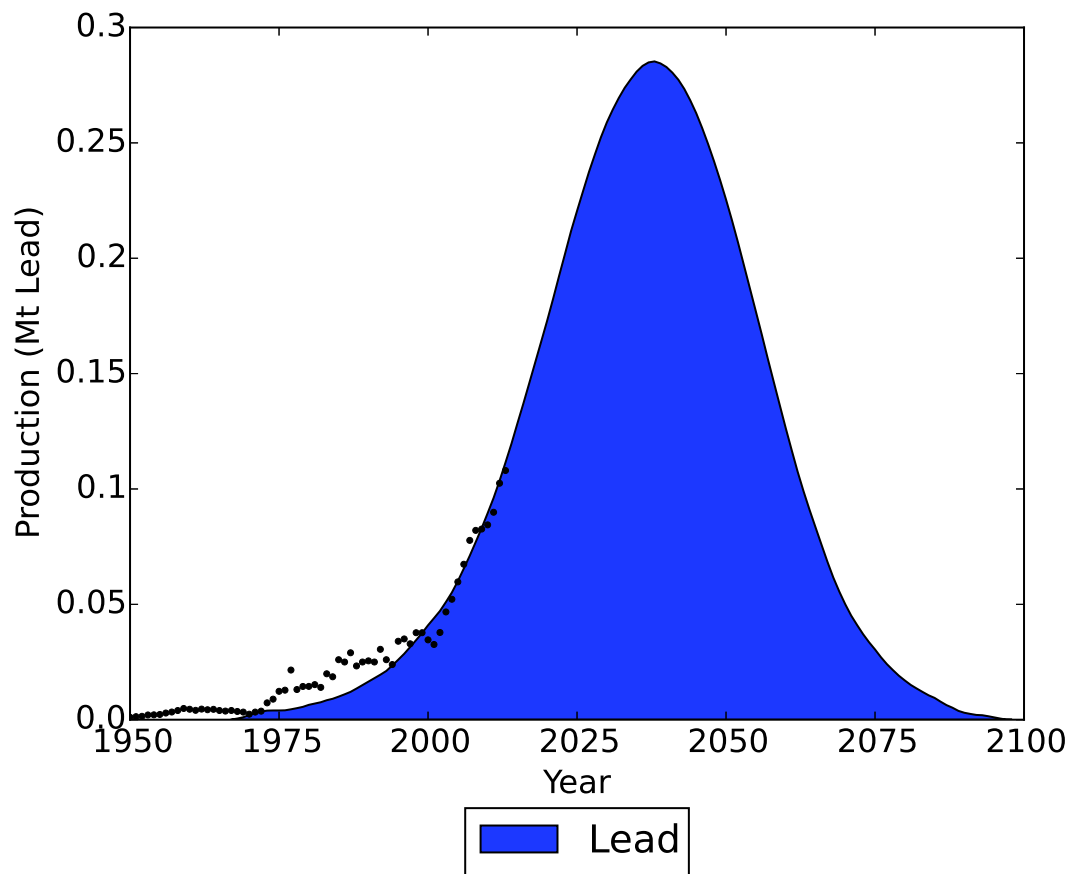

Figure 2.10: India projection by mineral type

Table 2.10: Peak years - Minerals

| Name  | URR   | Peak Year | Peak Rate |
|-------|-------|-----------|-----------|
| Lead  | 12.93 | 2038      | 0.29      |
| Total | 12.93 | 2038      | 0.29      |

## 2.6 Indonesia

### 2.6.1 All Projections

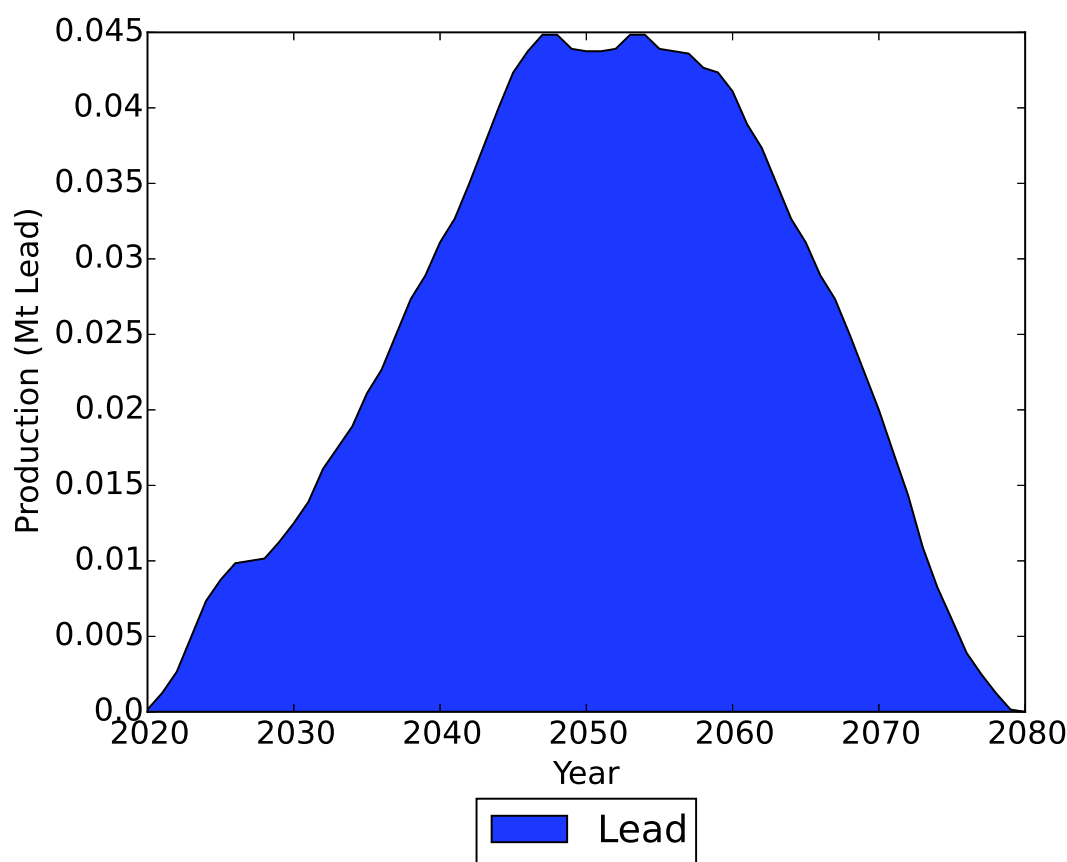

Figure 2.11: Indonesia projections capped at 16

Table 2.11: Peak years - All

| Name  | URR  | Peak Year | Peak Rate |
|-------|------|-----------|-----------|
| Lead  | 1.51 | 2047      | 0.04      |
| Total | 1.51 | 2048      | 0.04      |

2.6.2 By Mineral

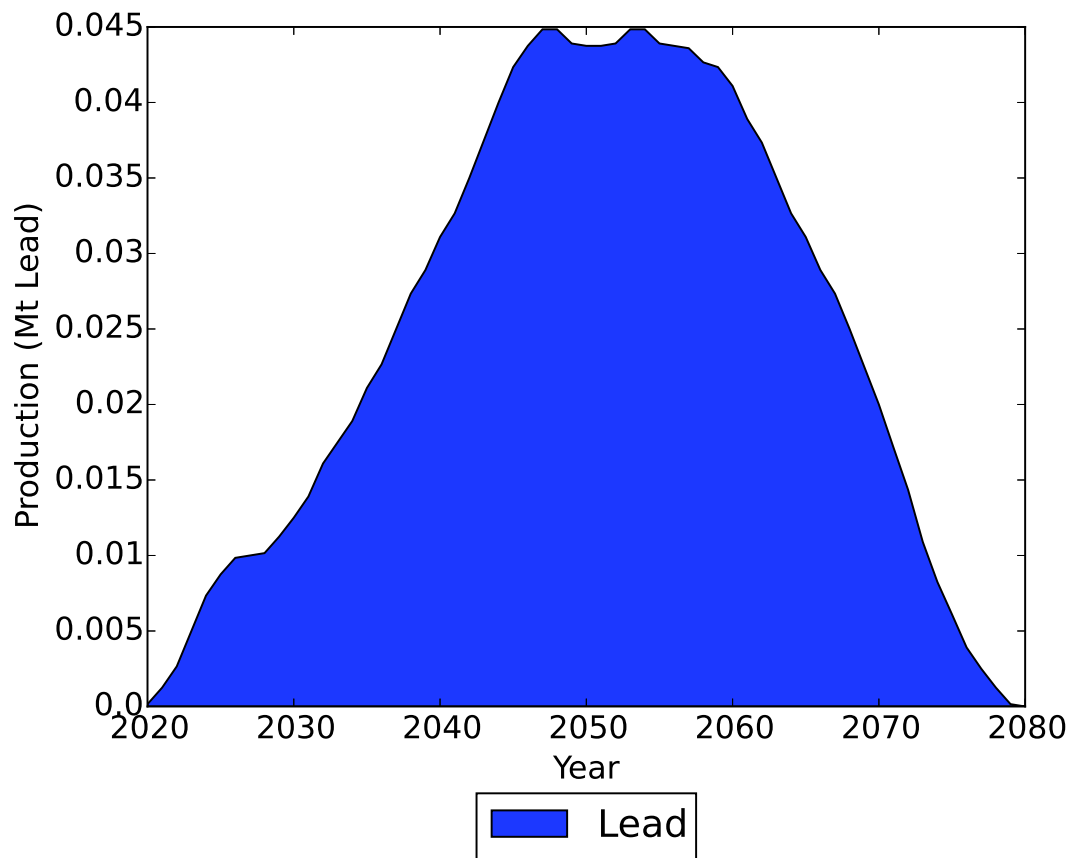

Figure 2.12: Indonesia projection by mineral type

Table 2.12: Peak years - Minerals

| Name         | URR         | Peak Year   | Peak Rate   |
|--------------|-------------|-------------|-------------|
| Lead         | 1.51        | 2047        | 0.04        |
| <b>Total</b> | <b>1.51</b> | <b>2048</b> | <b>0.04</b> |

2.7 Iran

2.7.1 All Projections

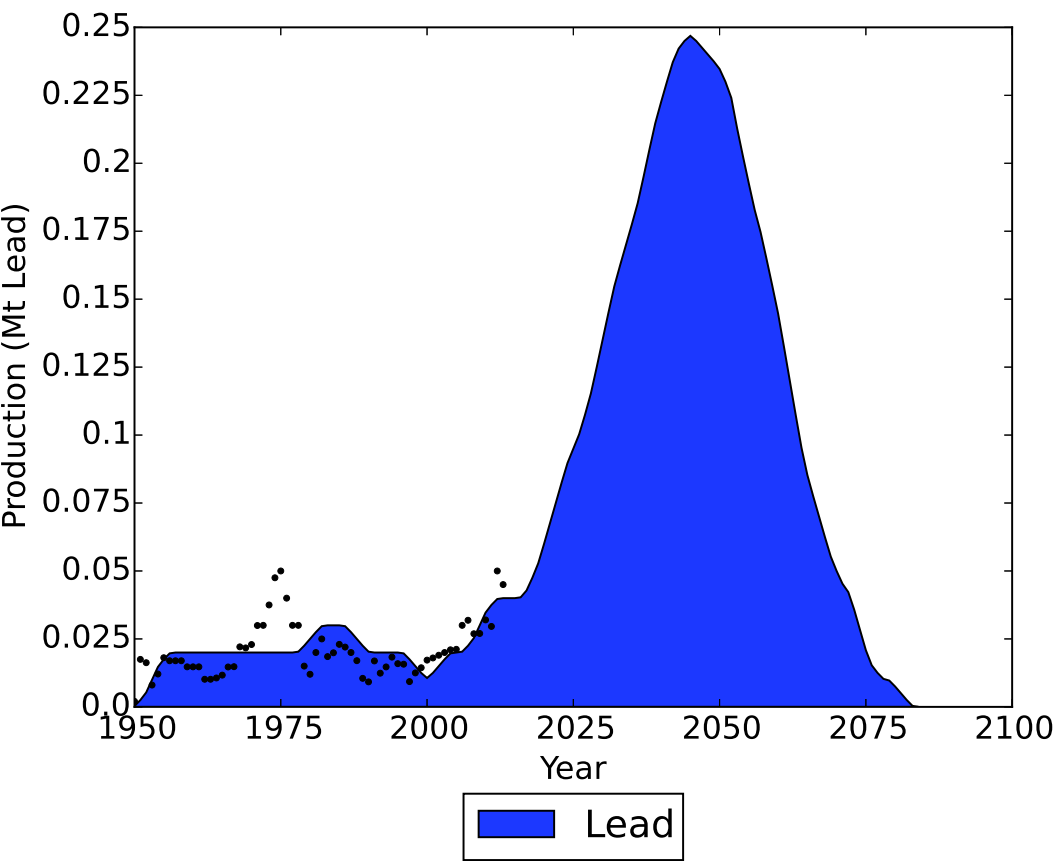

Figure 2.13: Iran projections capped at 16

| Table 2.13: Peak years - All |      |           |           |
|------------------------------|------|-----------|-----------|
| Name                         | URR  | Peak Year | Peak Rate |
| Lead                         | 9.87 | 2045      | 0.25      |
| Total                        | 9.87 | 2045      | 0.25      |

2.7.2 By Mineral

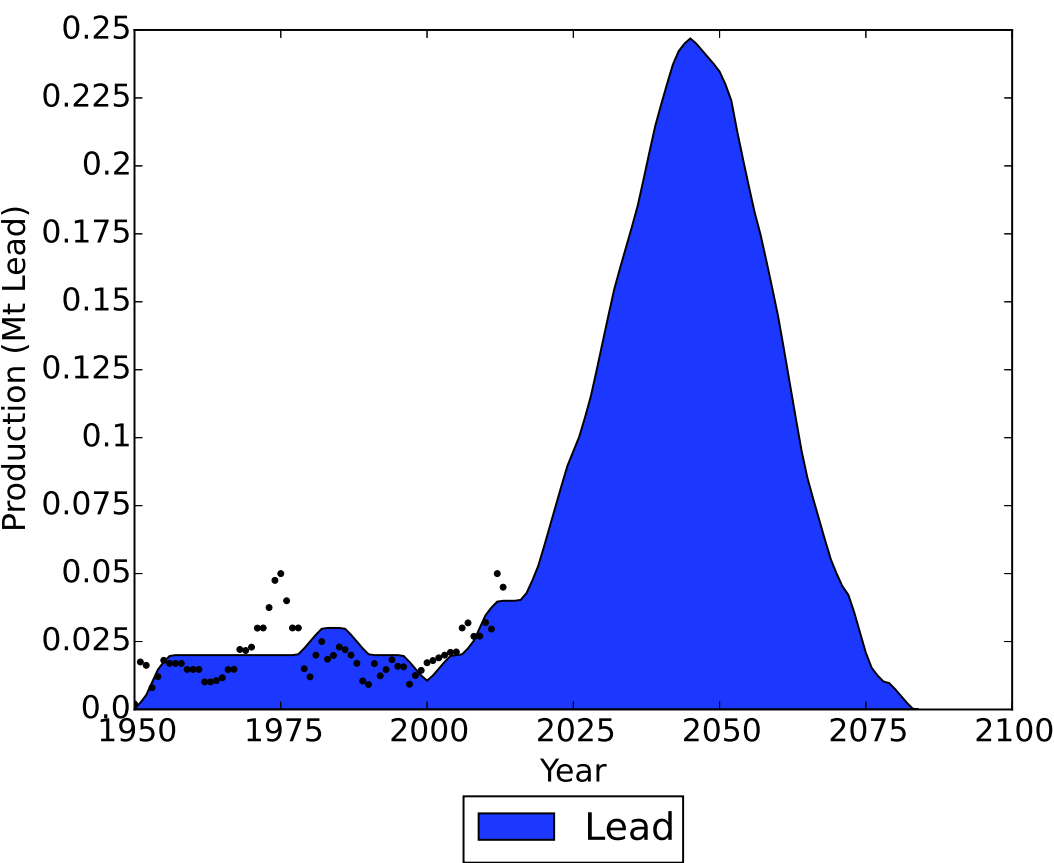

Figure 2.14: Iran projection by mineral type

| Table 2.14: Peak years - Minerals |      |           |           |
|-----------------------------------|------|-----------|-----------|
| Name                              | URR  | Peak Year | Peak Rate |
| Lead                              | 9.87 | 2045      | 0.25      |
| Total                             | 9.87 | 2045      | 0.25      |

2.8 Japan

2.8.1 All Projections

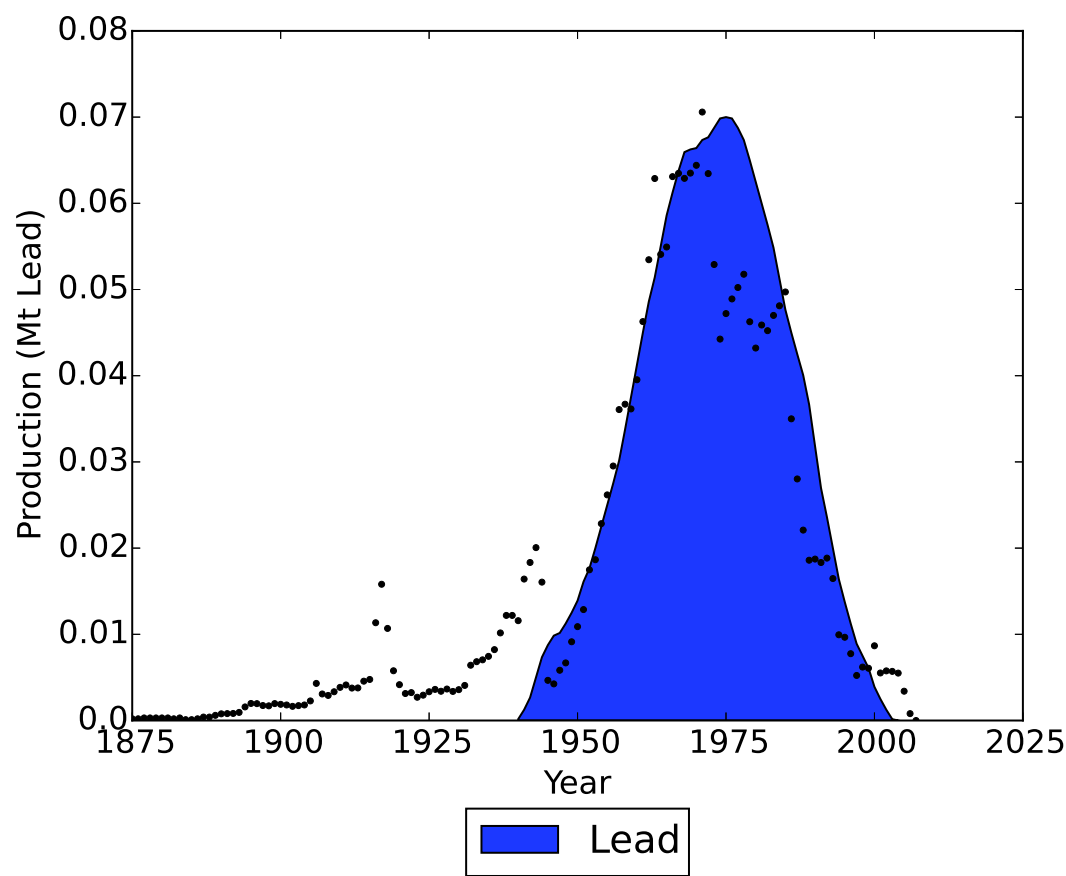

Figure 2.15: Japan projections capped at 16

| Table 2.15: Peak years - All |      |           |           |
|------------------------------|------|-----------|-----------|
| Name                         | URR  | Peak Year | Peak Rate |
| Lead                         | 2.22 | 1975      | 0.07      |
| Total                        | 2.22 | 1975      | 0.07      |

2.8.2 By Mineral

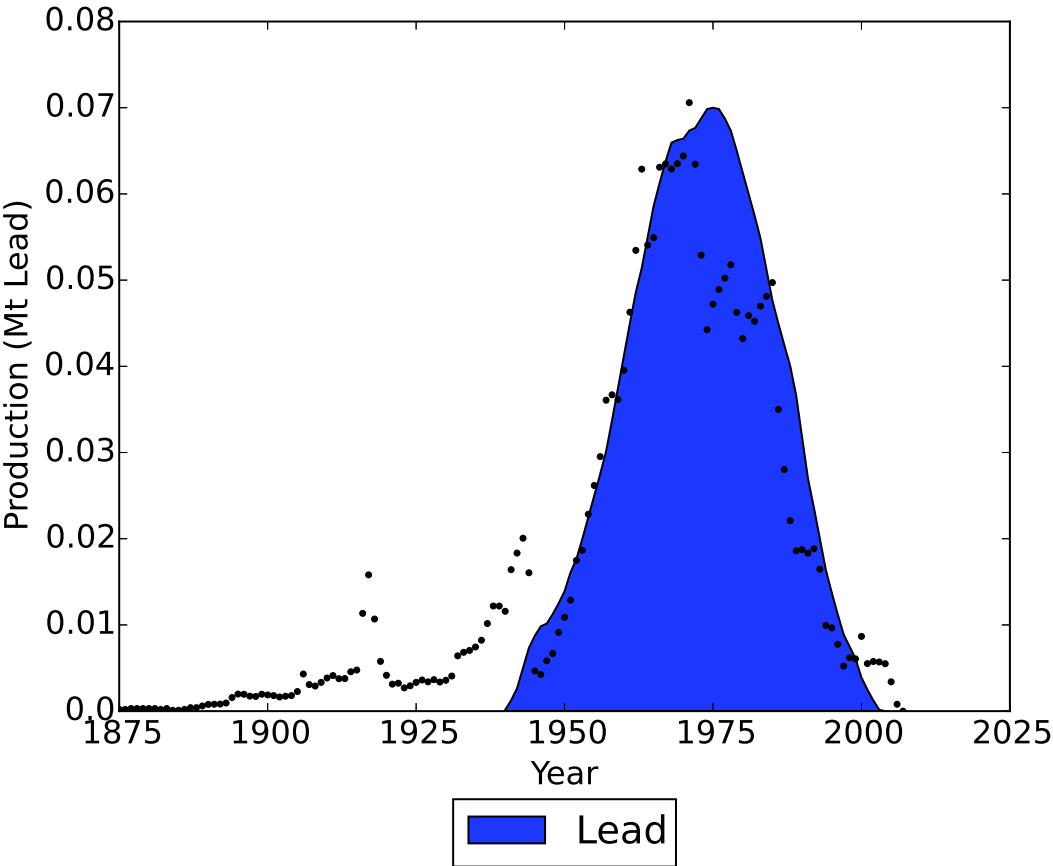

Figure 2.16: Japan projection by mineral type

| Table 2.16: Peak years - Minerals |      |           |           |
|-----------------------------------|------|-----------|-----------|
| Name                              | URR  | Peak Year | Peak Rate |
| Lead                              | 2.22 | 1975      | 0.07      |
| Total                             | 2.22 | 1975      | 0.07      |



2.9 Laos

2.9.1 All Projections

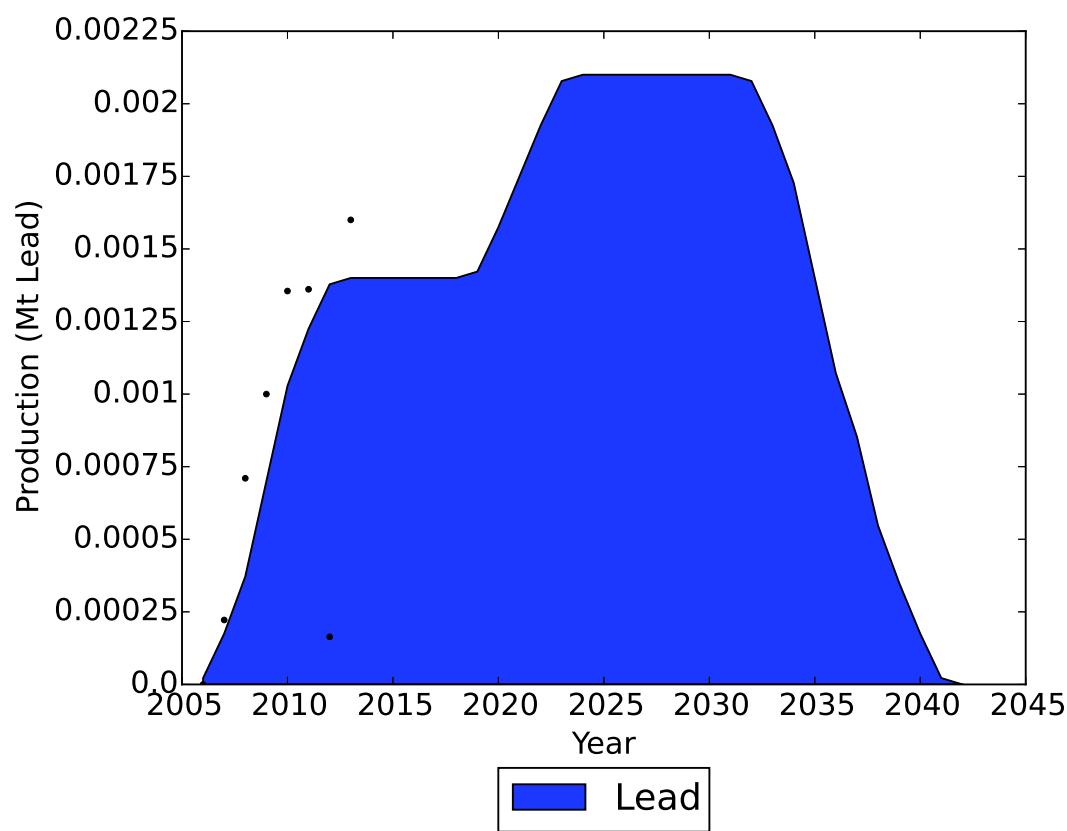

Figure 2.17: Laos projections capped at 16

| Table 2.17: Peak years - All |      |           |           |
|------------------------------|------|-----------|-----------|
| Name                         | URR  | Peak Year | Peak Rate |
| Lead                         | 0.05 | 2024      | —         |
| Total                        | 0.05 | 2024      | —         |

2.9.2 By Mineral

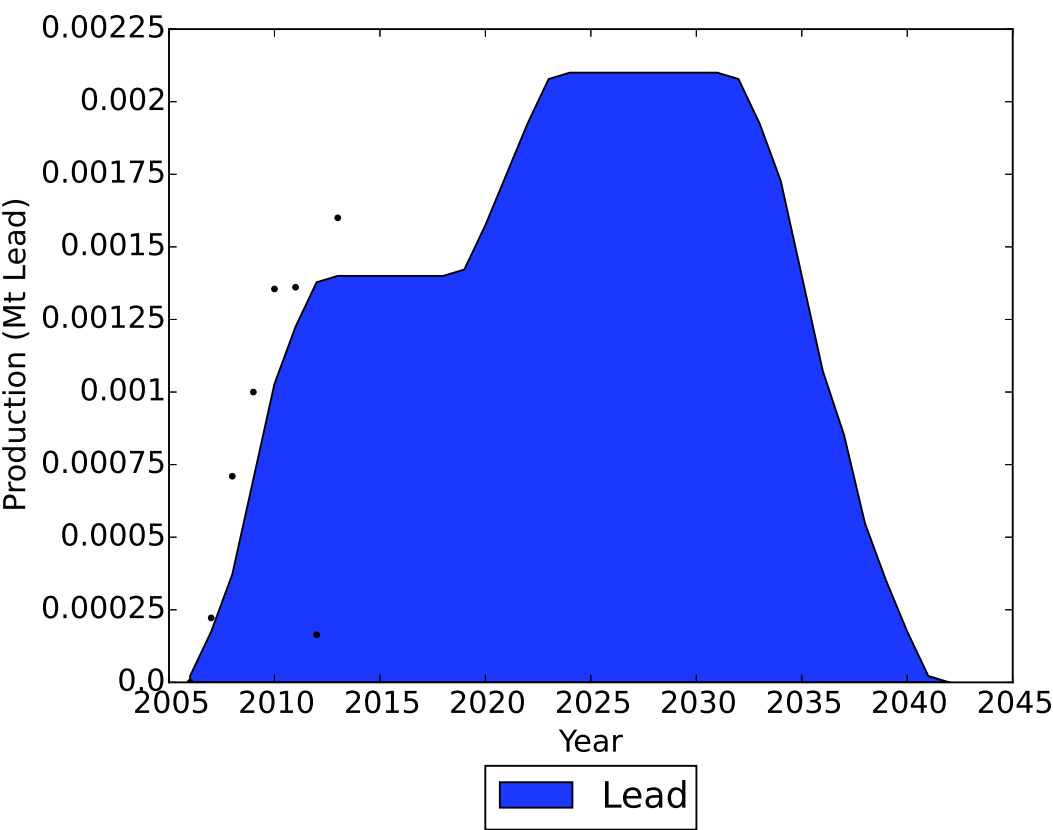

Figure 2.18: Laos projection by mineral type

| Table 2.18: Peak years - Minerals |      |           |           |
|-----------------------------------|------|-----------|-----------|
| Name                              | URR  | Peak Year | Peak Rate |
| Lead                              | 0.05 | 2024      | —         |
| Total                             | 0.05 | 2024      | —         |

2.10 Malaysia

2.10.1 All Projections

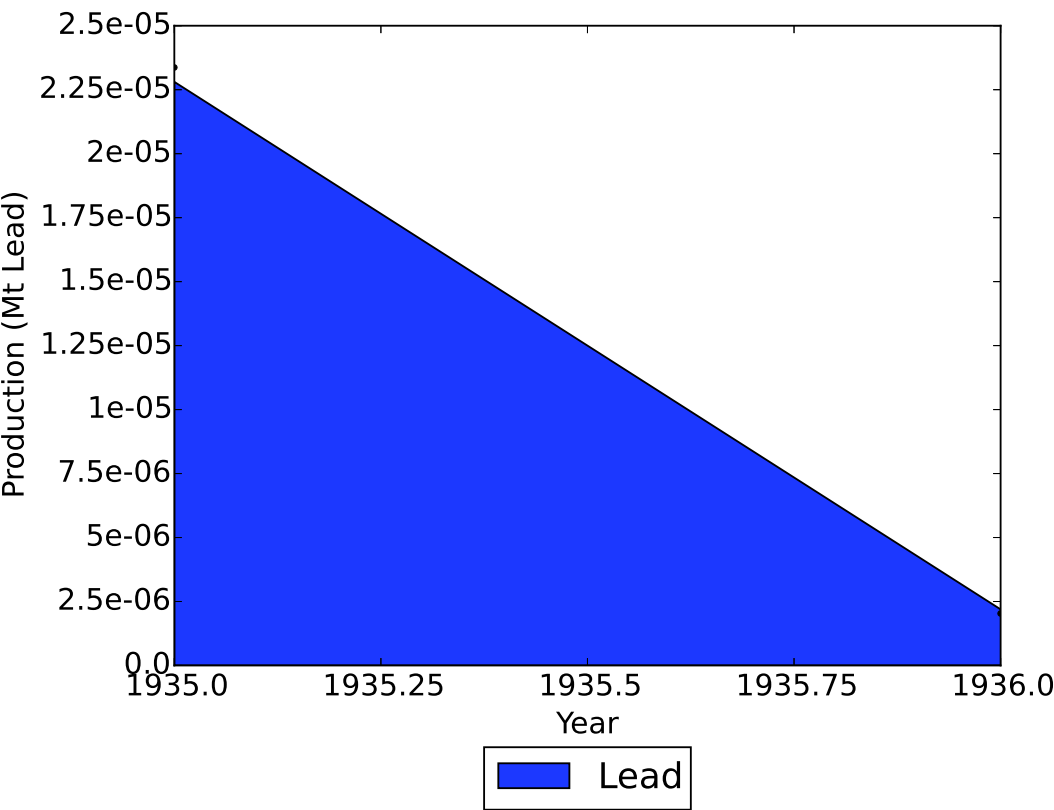

Figure 2.19: Malaysia projections capped at 16

| Table 2.19: Peak years - All |     |           |           |
|------------------------------|-----|-----------|-----------|
| Name                         | URR | Peak Year | Peak Rate |
| Lead                         | –   | 1935      | –         |
| Total                        | –   | 1935      | –         |

2.10.2 By Mineral

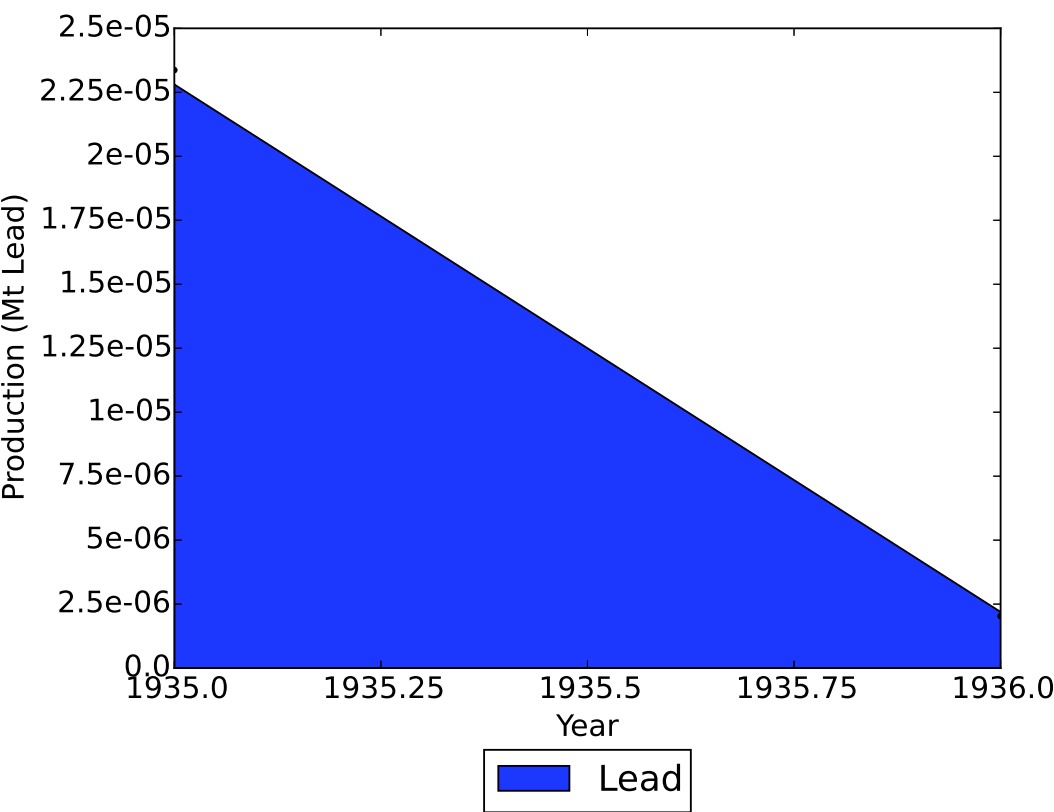

Figure 2.20: Malaysia projection by mineral type

| Table 2.20: Peak years - Minerals |     |           |           |
|-----------------------------------|-----|-----------|-----------|
| Name                              | URR | Peak Year | Peak Rate |
| Lead                              | –   | 1935      | –         |
| Total                             | –   | 1935      | –         |

2.11 Nepal

2.11.1 All Projections

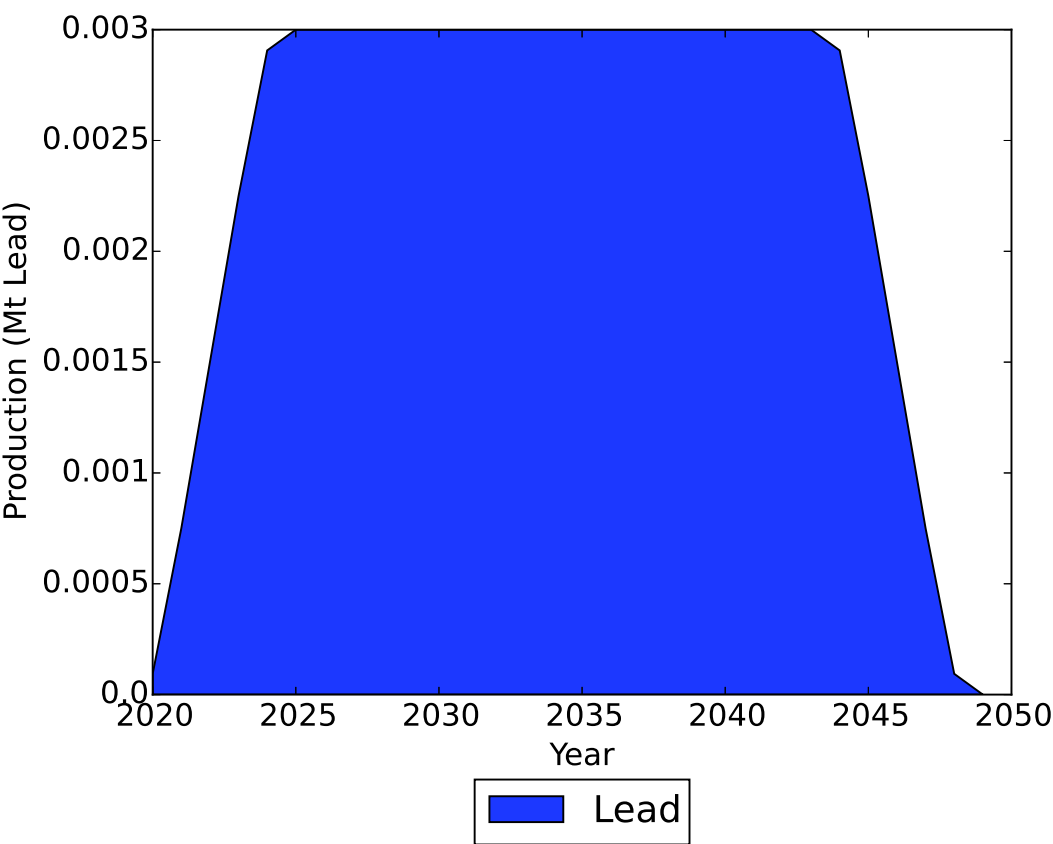

Figure 2.21: Nepal projections capped at 16

| Table 2.21: Peak years - All |      |           |           |
|------------------------------|------|-----------|-----------|
| Name                         | URR  | Peak Year | Peak Rate |
| Lead                         | 0.07 | 2025      | –         |
| Total                        | 0.07 | 2025      | –         |

2.11.2 By Mineral

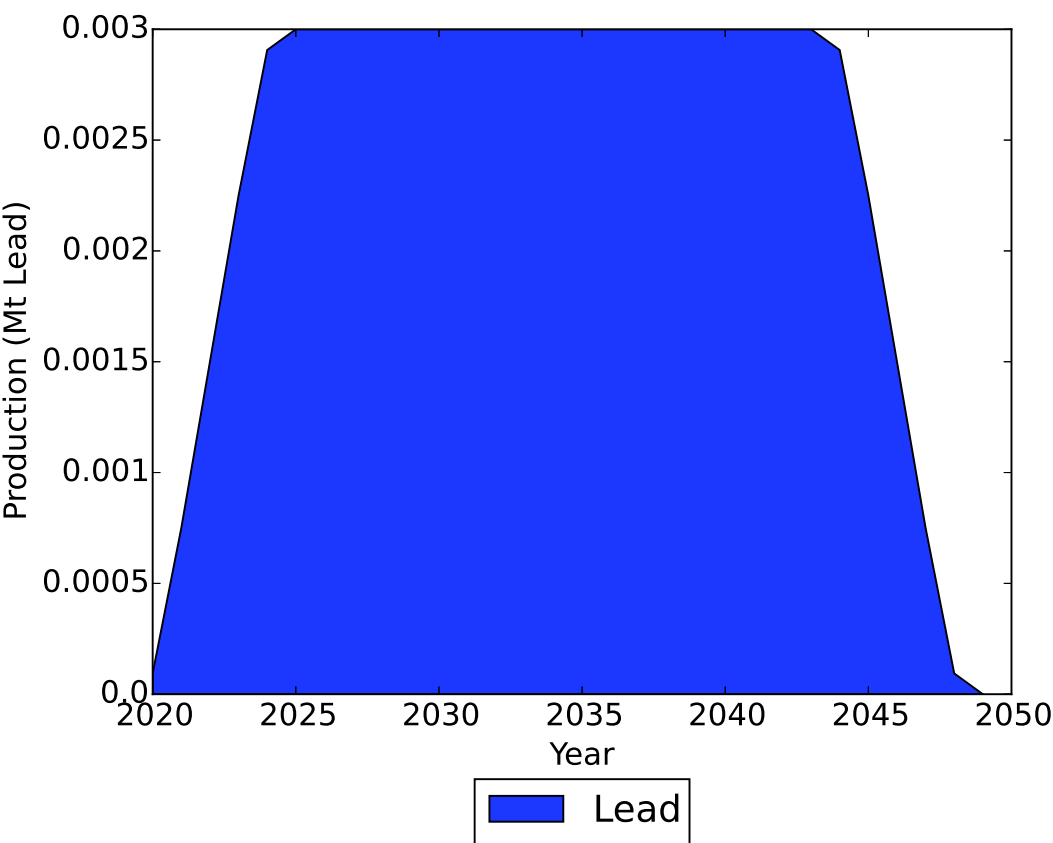

Figure 2.22: Nepal projection by mineral type

Table 2.22: Peak years - Minerals

| Name  | URR  | Peak Year | Peak Rate |
|-------|------|-----------|-----------|
| Lead  | 0.07 | 2025      | –         |
| Total | 0.07 | 2025      | –         |

2.12 New Caledonia

2.12.1 All Projections

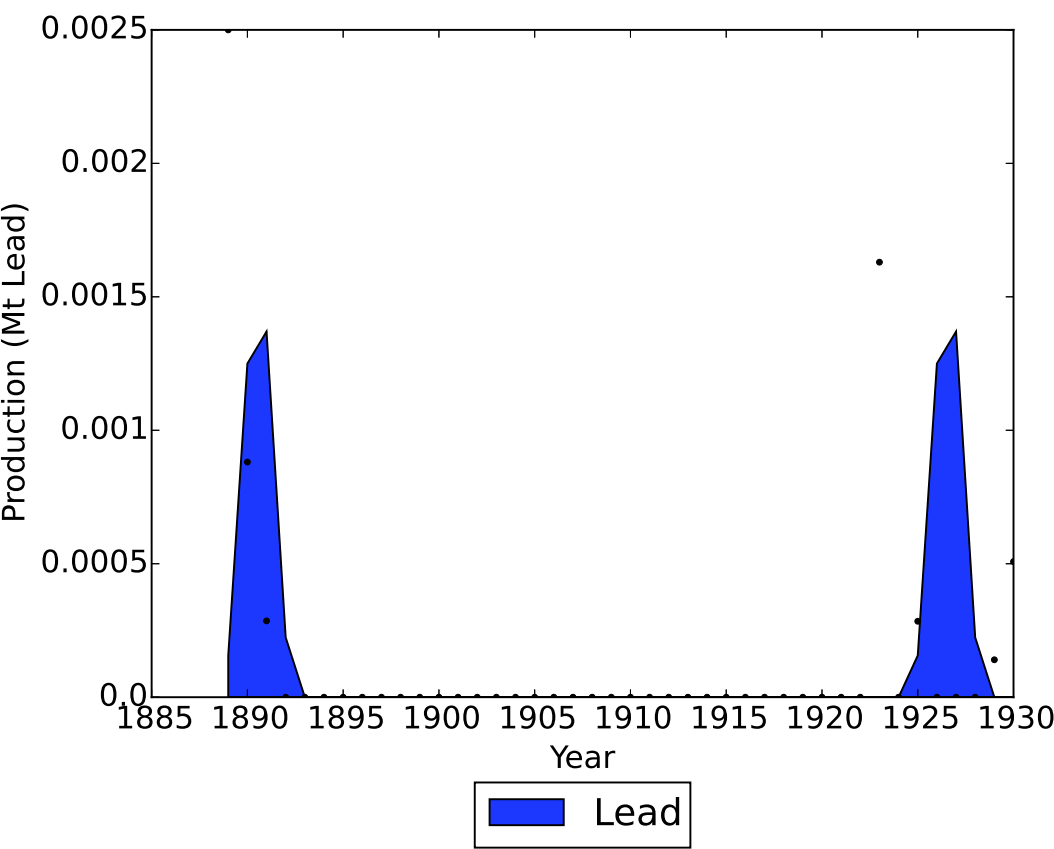

Figure 2.23: New Caledonia projections capped at 16

Table 2.23: Peak years - All

| Name  | URR  | Peak Year | Peak Rate |
|-------|------|-----------|-----------|
| Lead  | 0.01 | 1891      | —         |
| Total | 0.01 | 1891      | —         |

2.12.2 By Mineral

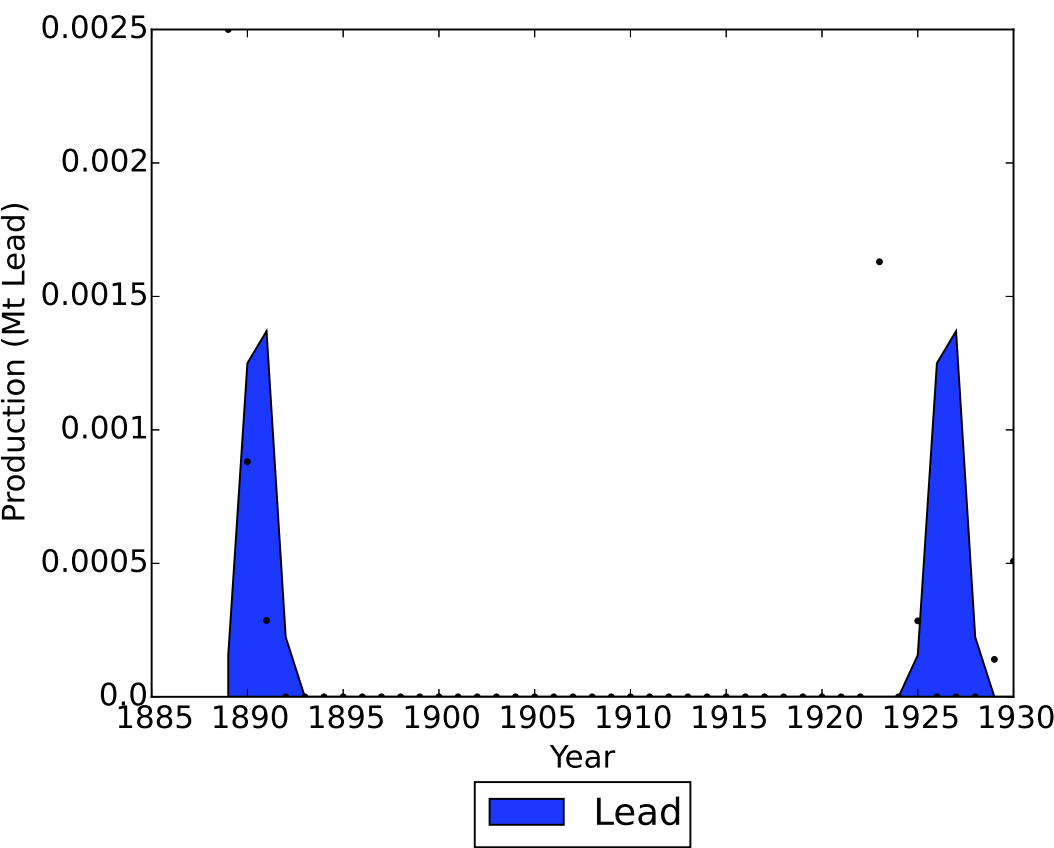

Figure 2.24: New Caledonia projection by mineral type

| Table 2.24: Peak years - Minerals |      |           |           |
|-----------------------------------|------|-----------|-----------|
| Name                              | URR  | Peak Year | Peak Rate |
| Lead                              | 0.01 | 1891      | –         |
| Total                             | 0.01 | 1891      | –         |



2.13 North Korea

2.13.1 All Projections

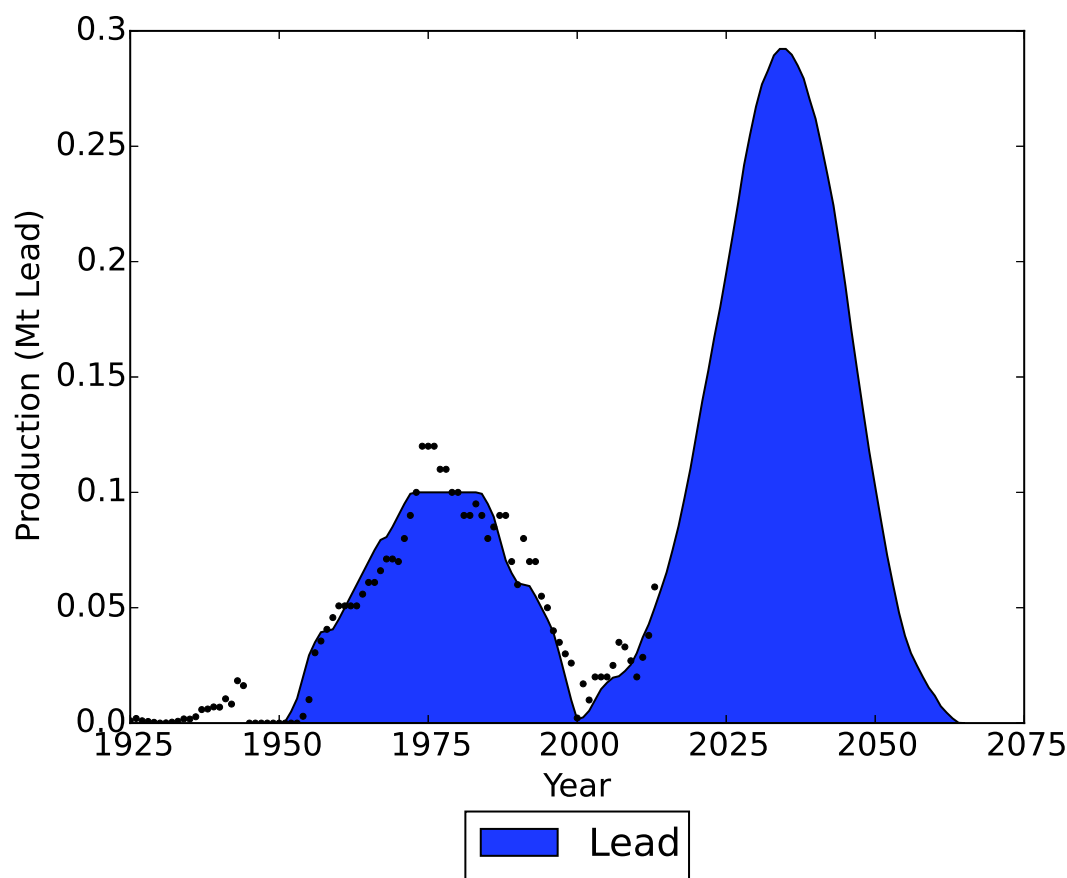

Figure 2.25: North Korea projections capped at 16

| Table 2.25: Peak years - All |       |           |           |
|------------------------------|-------|-----------|-----------|
| Name                         | URR   | Peak Year | Peak Rate |
| Lead                         | 11.18 | 2034      | 0.29      |
| Total                        | 11.18 | 2034      | 0.29      |

2.13.2 By Mineral

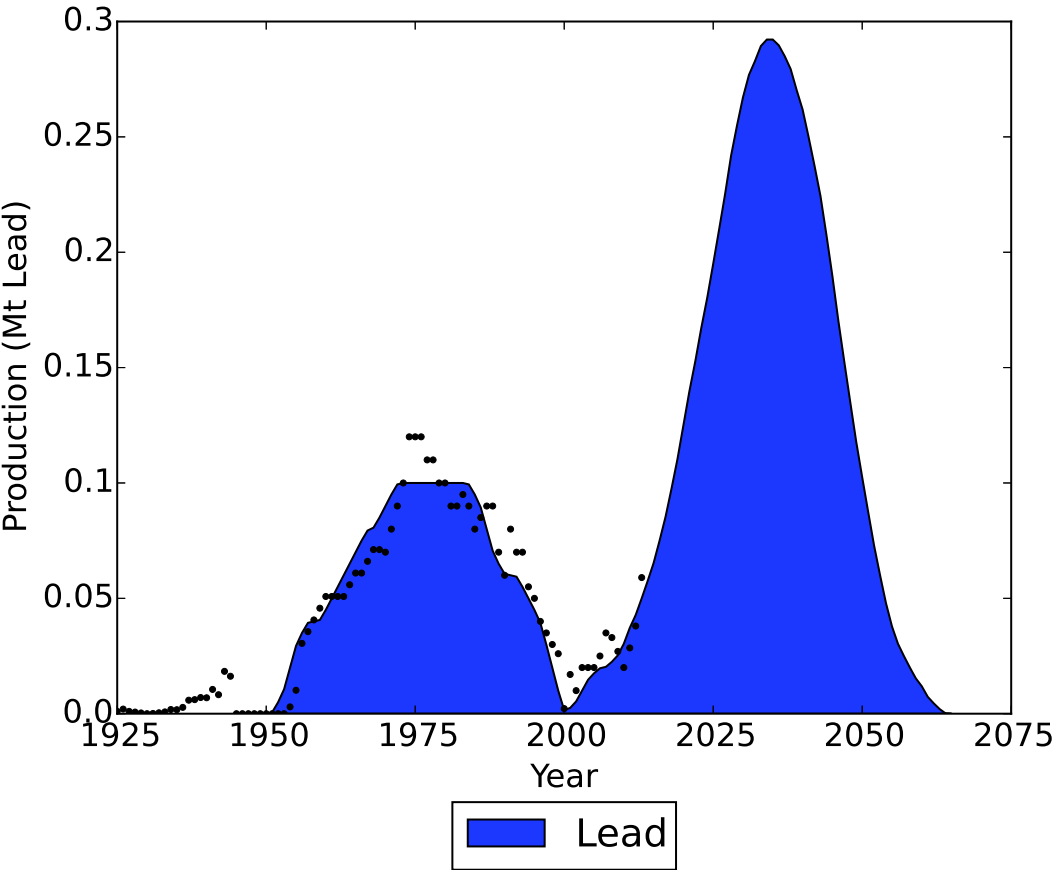

Figure 2.26: North Korea projection by mineral type

| Table 2.26: Peak years - Minerals |       |           |           |
|-----------------------------------|-------|-----------|-----------|
| Name                              | URR   | Peak Year | Peak Rate |
| Lead                              | 11.18 | 2034      | 0.29      |
| Total                             | 11.18 | 2034      | 0.29      |

2.14 PNG

2.14.1 All Projections

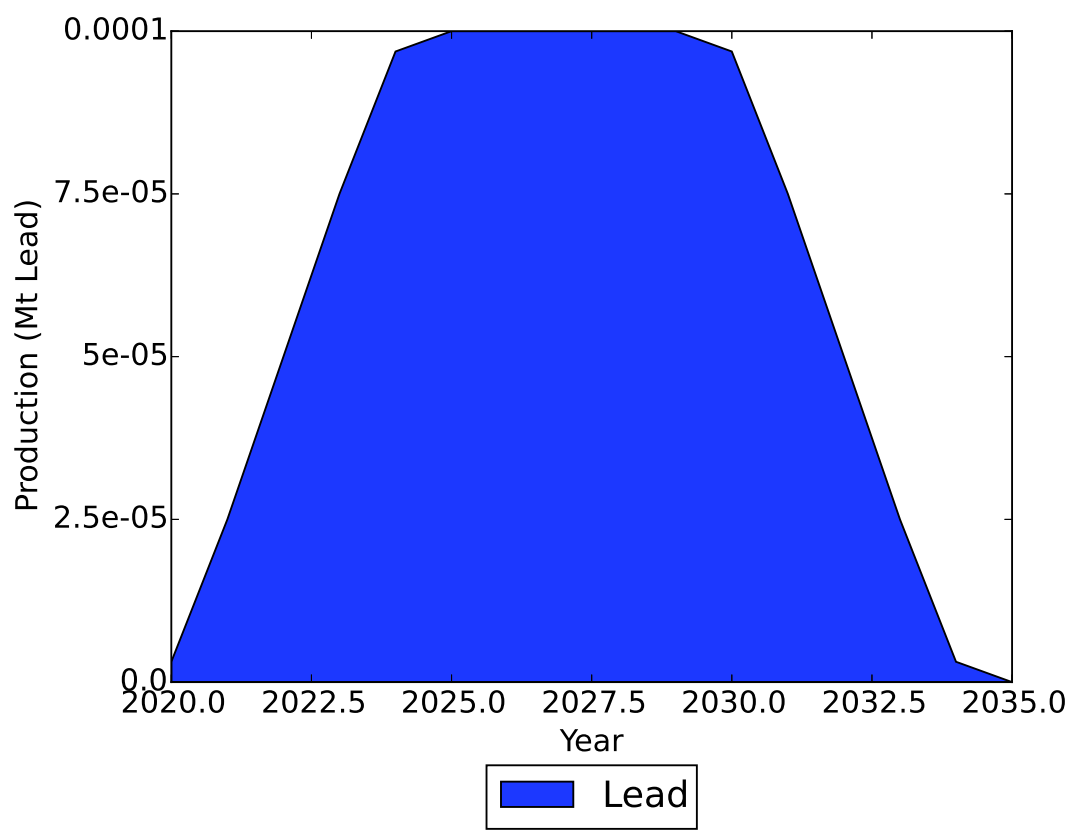

Figure 2.27: PNG projections capped at 16

| Table 2.27: Peak years - All |     |           |           |
|------------------------------|-----|-----------|-----------|
| Name                         | URR | Peak Year | Peak Rate |
| Lead                         | –   | 2025      | –         |
| Total                        | –   | 2025      | –         |

2.14.2 By Mineral

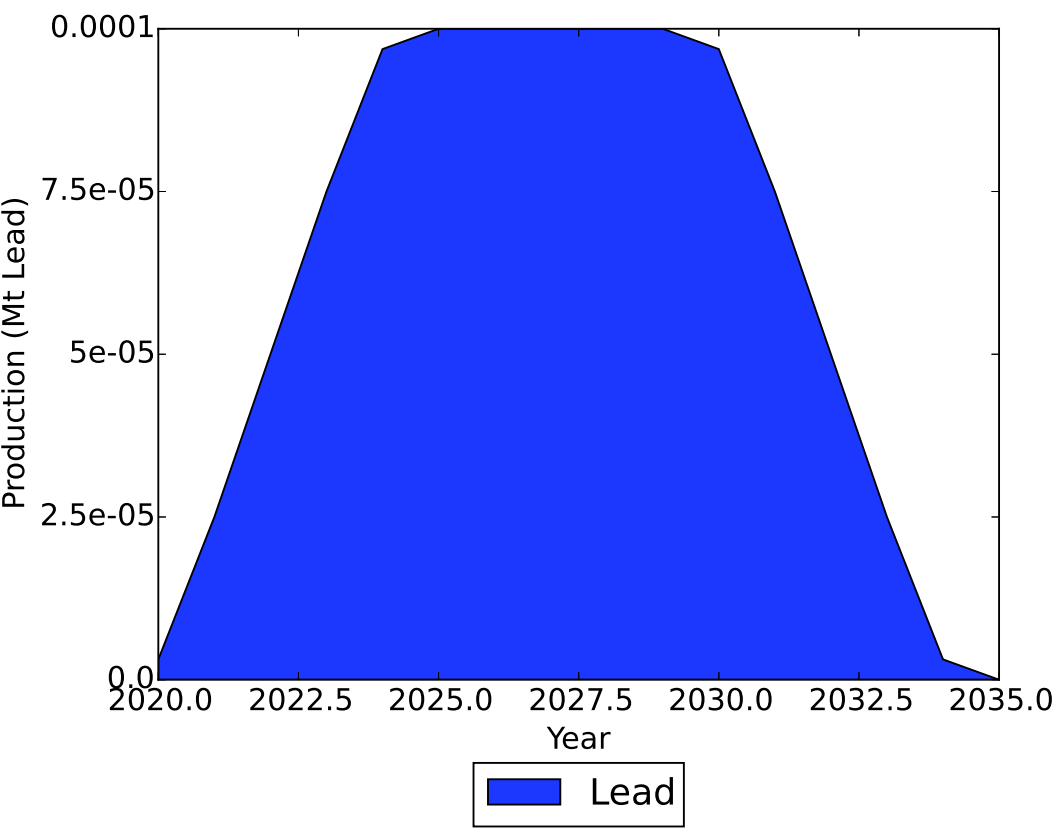

Figure 2.28: PNG projection by mineral type

| Table 2.28: Peak years - Minerals |     |           |           |
|-----------------------------------|-----|-----------|-----------|
| Name                              | URR | Peak Year | Peak Rate |
| Lead                              | –   | 2025      | –         |
| Total                             | –   | 2025      | –         |

2.15 Pakistan

2.15.1 All Projections

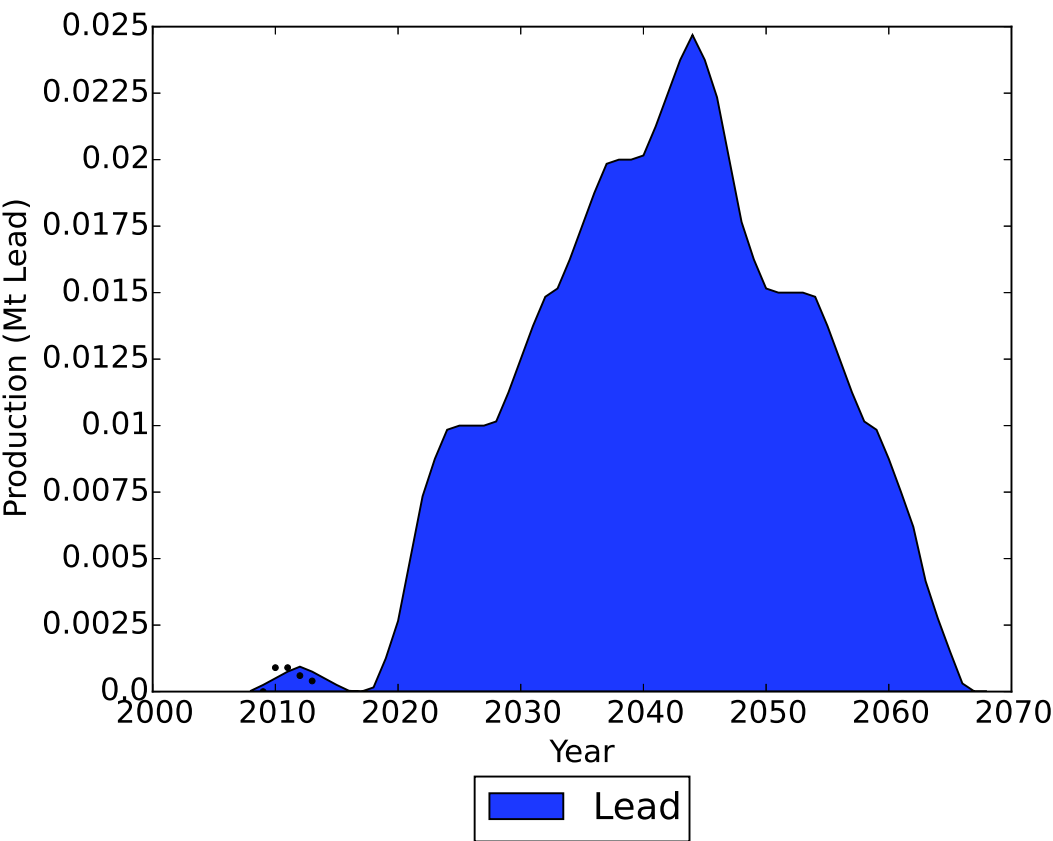

Figure 2.29: Pakistan projections capped at 16

| Table 2.29: Peak years - All |      |           |           |
|------------------------------|------|-----------|-----------|
| Name                         | URR  | Peak Year | Peak Rate |
| Lead                         | 0.64 | 2044      | 0.02      |
| Total                        | 0.64 | 2044      | 0.02      |

2.15.2 By Mineral

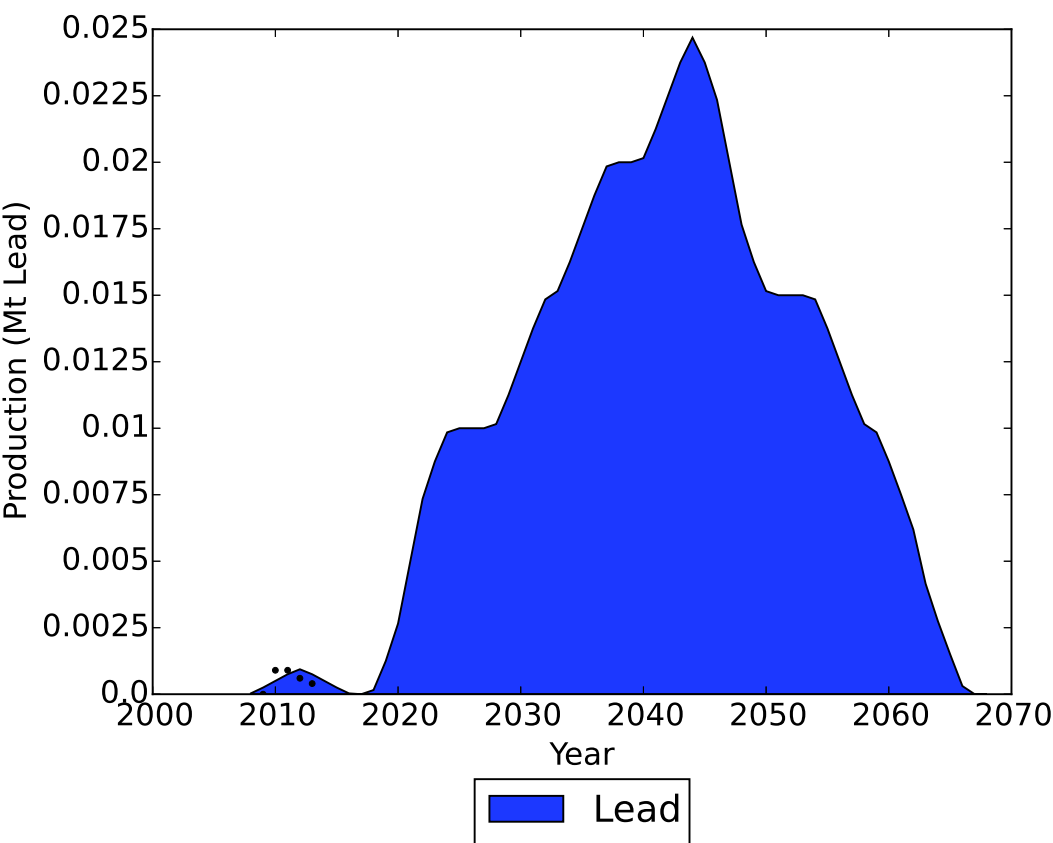

Figure 2.30: Pakistan projection by mineral type

| Table 2.30: Peak years - Minerals |      |           |           |
|-----------------------------------|------|-----------|-----------|
| Name                              | URR  | Peak Year | Peak Rate |
| Lead                              | 0.64 | 2044      | 0.02      |
| Total                             | 0.64 | 2044      | 0.02      |

2.16 Philippines

2.16.1 All Projections

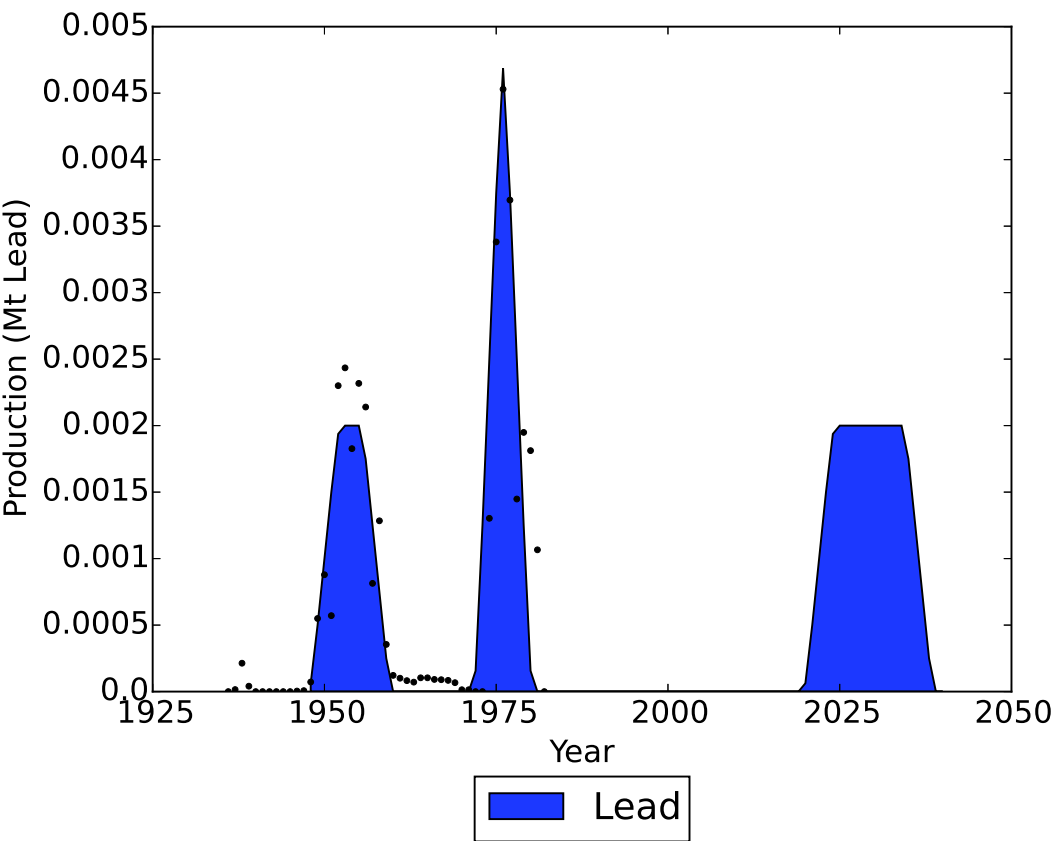

Figure 2.31: Philippines projections capped at 16

| Table 2.31: Peak years - All |             |             |           |
|------------------------------|-------------|-------------|-----------|
| Name                         | URR         | Peak Year   | Peak Rate |
| Lead                         | 0.06        | 1976        | —         |
| <b>Total</b>                 | <b>0.06</b> | <b>1976</b> | —         |

2.16.2 By Mineral

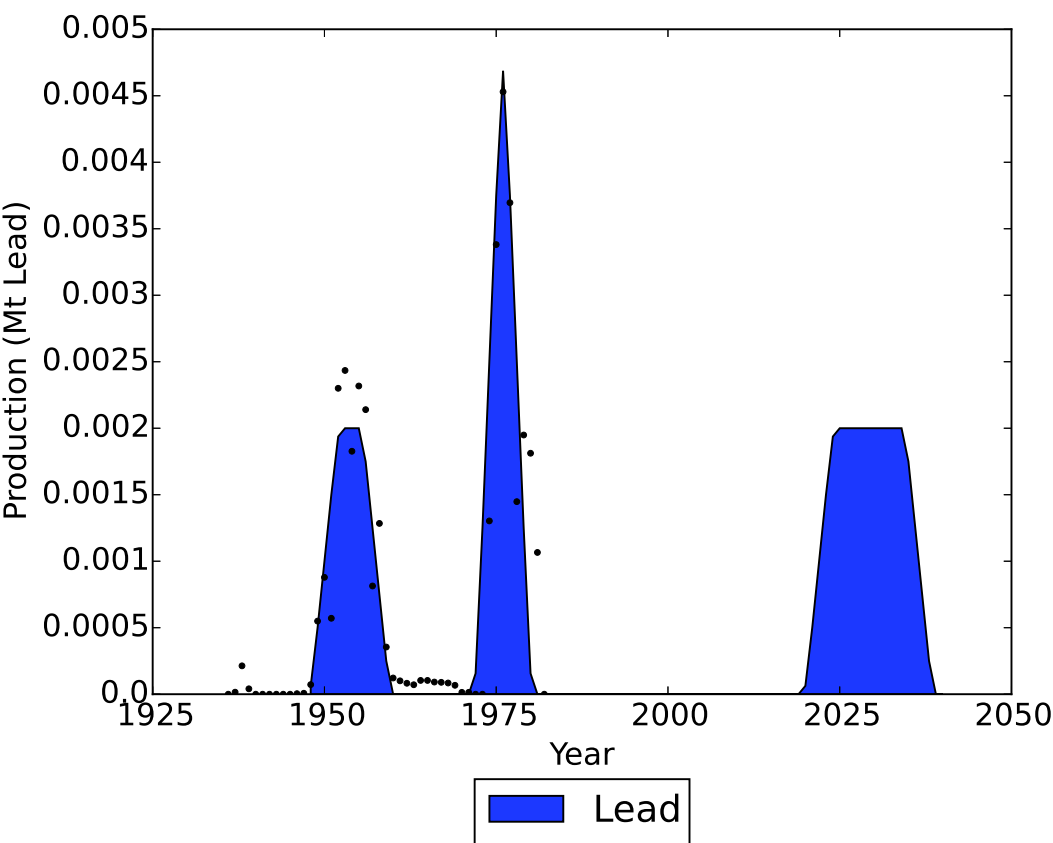

Figure 2.32: Philippines projection by mineral type

| Table 2.32: Peak years - Minerals |      |           |           |
|-----------------------------------|------|-----------|-----------|
| Name                              | URR  | Peak Year | Peak Rate |
| Lead                              | 0.06 | 1976      | —         |
| Total                             | 0.06 | 1976      | —         |



2.17 Saudi Arabia

2.17.1 All Projections

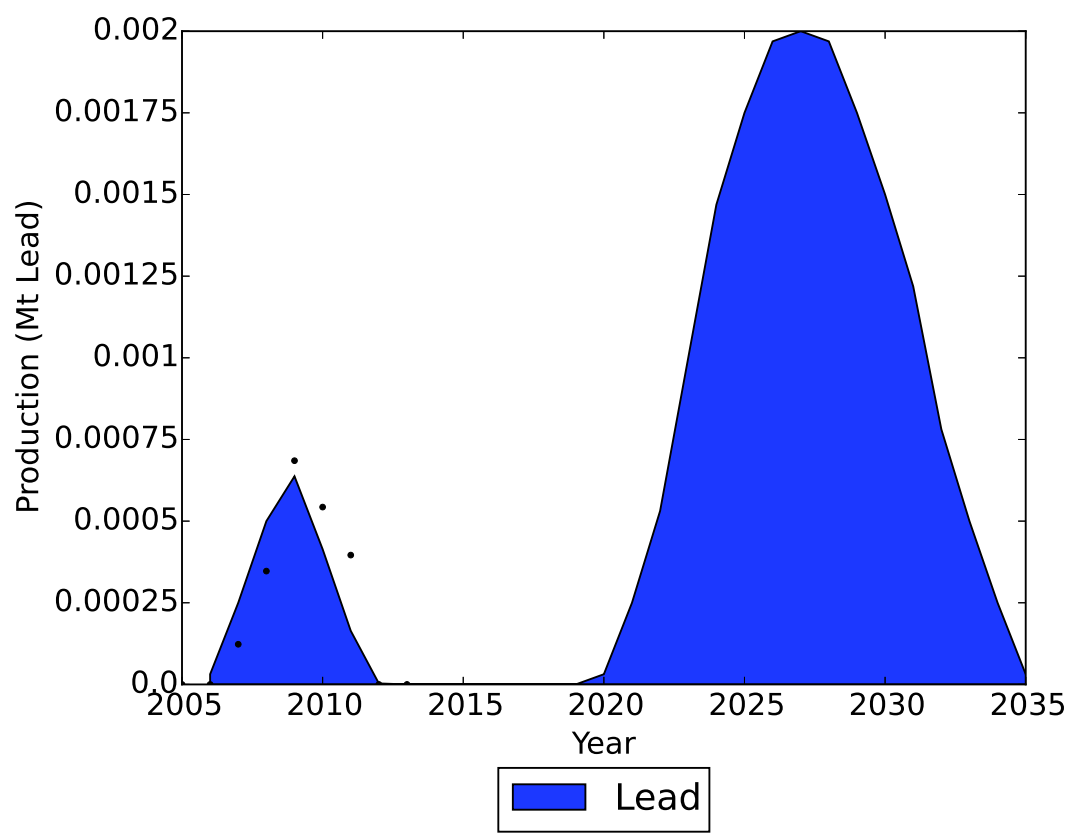

Figure 2.33: Saudi Arabia projections capped at 16

| Table 2.33: Peak years - All |      |           |           |
|------------------------------|------|-----------|-----------|
| Name                         | URR  | Peak Year | Peak Rate |
| Lead                         | 0.02 | 2027      | —         |
| Total                        | 0.02 | 2027      | —         |

2.17.2 By Mineral

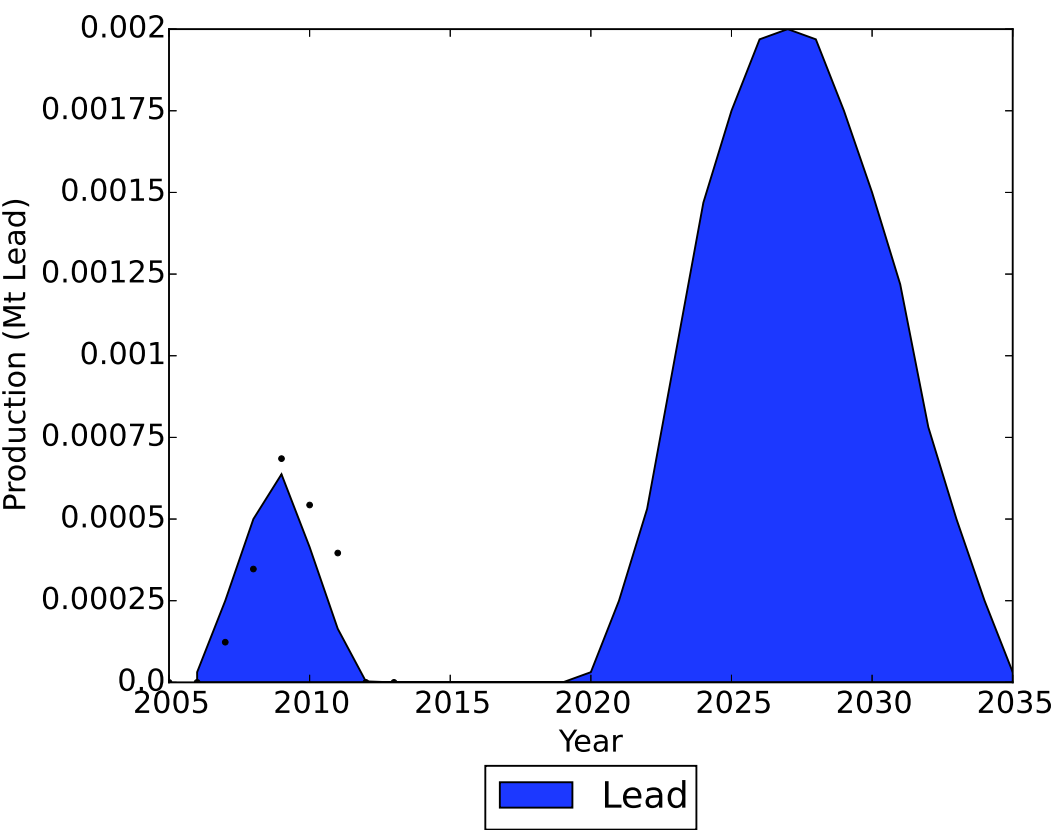

Figure 2.34: Saudi Arabia projection by mineral type

| Table 2.34: Peak years - Minerals |      |           |           |
|-----------------------------------|------|-----------|-----------|
| Name                              | URR  | Peak Year | Peak Rate |
| Lead                              | 0.02 | 2027      | —         |
| Total                             | 0.02 | 2027      | —         |

2.18 South Korea

2.18.1 All Projections

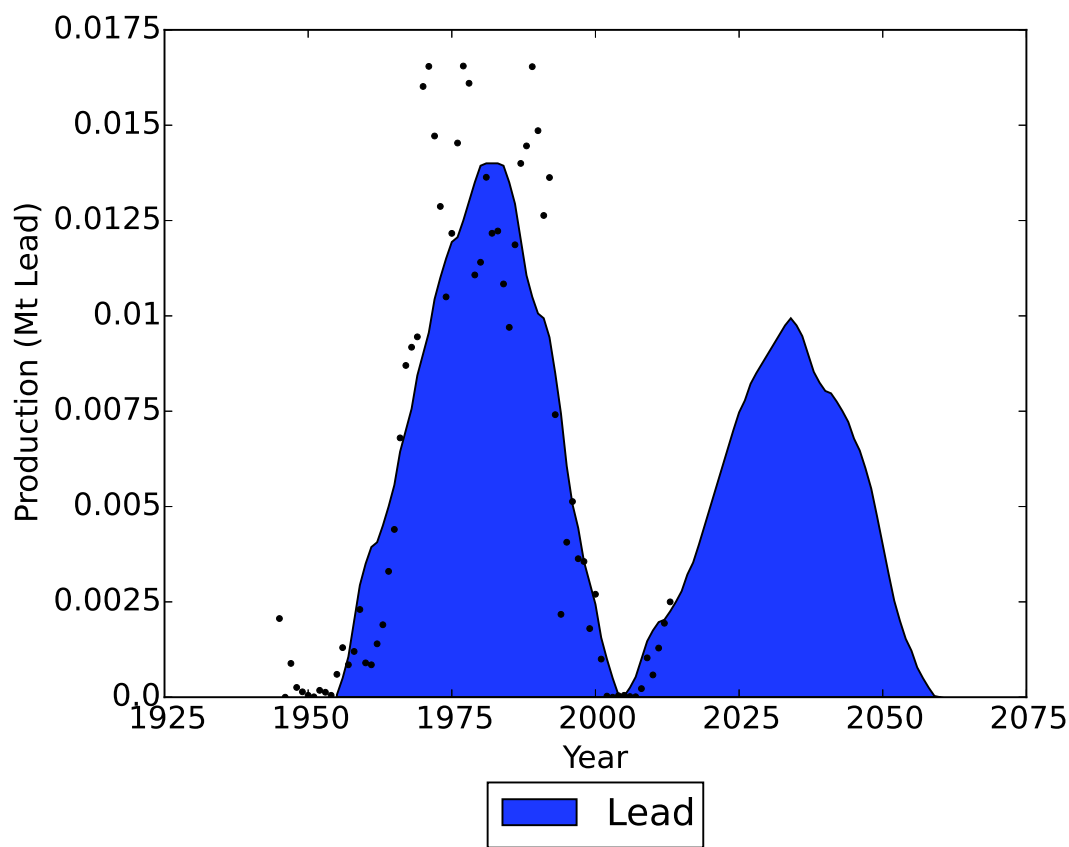

Figure 2.35: South Korea projections capped at 16

| Table 2.35: Peak years - All |      |           |           |
|------------------------------|------|-----------|-----------|
| Name                         | URR  | Peak Year | Peak Rate |
| Lead                         | 0.66 | 1981      | 0.01      |
| Total                        | 0.66 | 1981      | 0.01      |

2.18.2 By Mineral

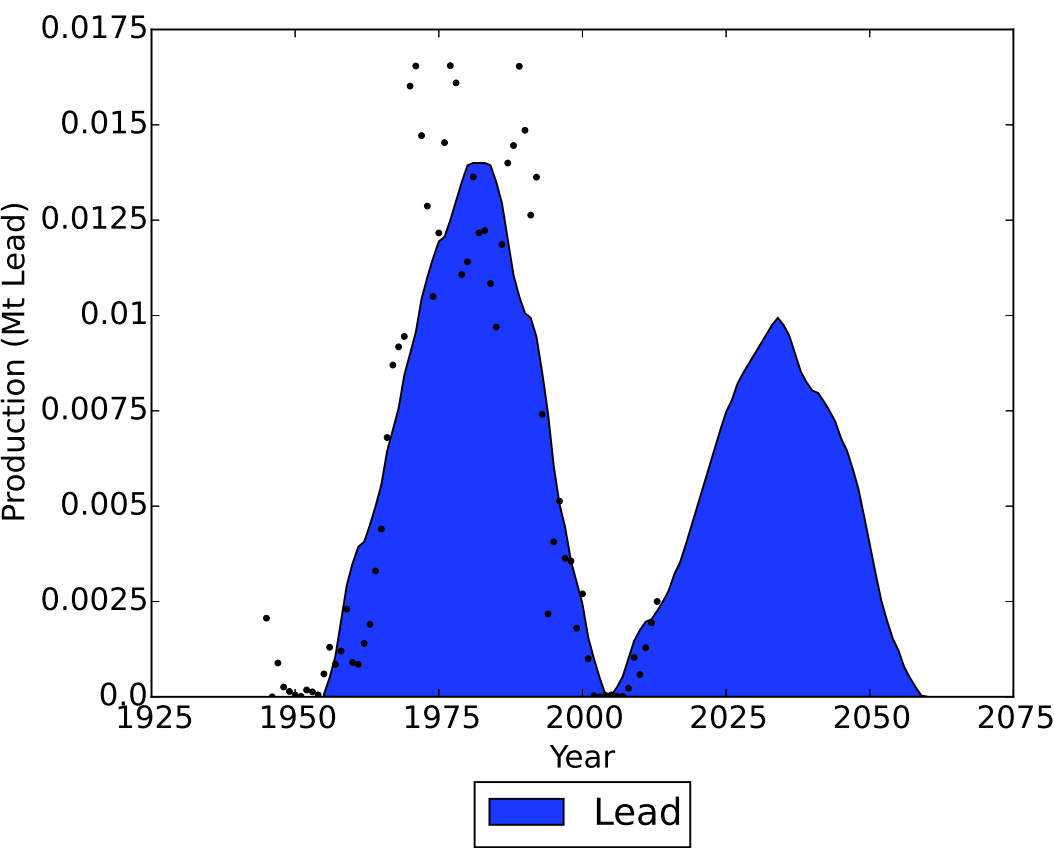

Figure 2.36: South Korea projection by mineral type

| Table 2.36: Peak years - Minerals |      |           |           |
|-----------------------------------|------|-----------|-----------|
| Name                              | URR  | Peak Year | Peak Rate |
| Lead                              | 0.66 | 1981      | 0.01      |
| Total                             | 0.66 | 1981      | 0.01      |

2.19 Thailand

2.19.1 All Projections

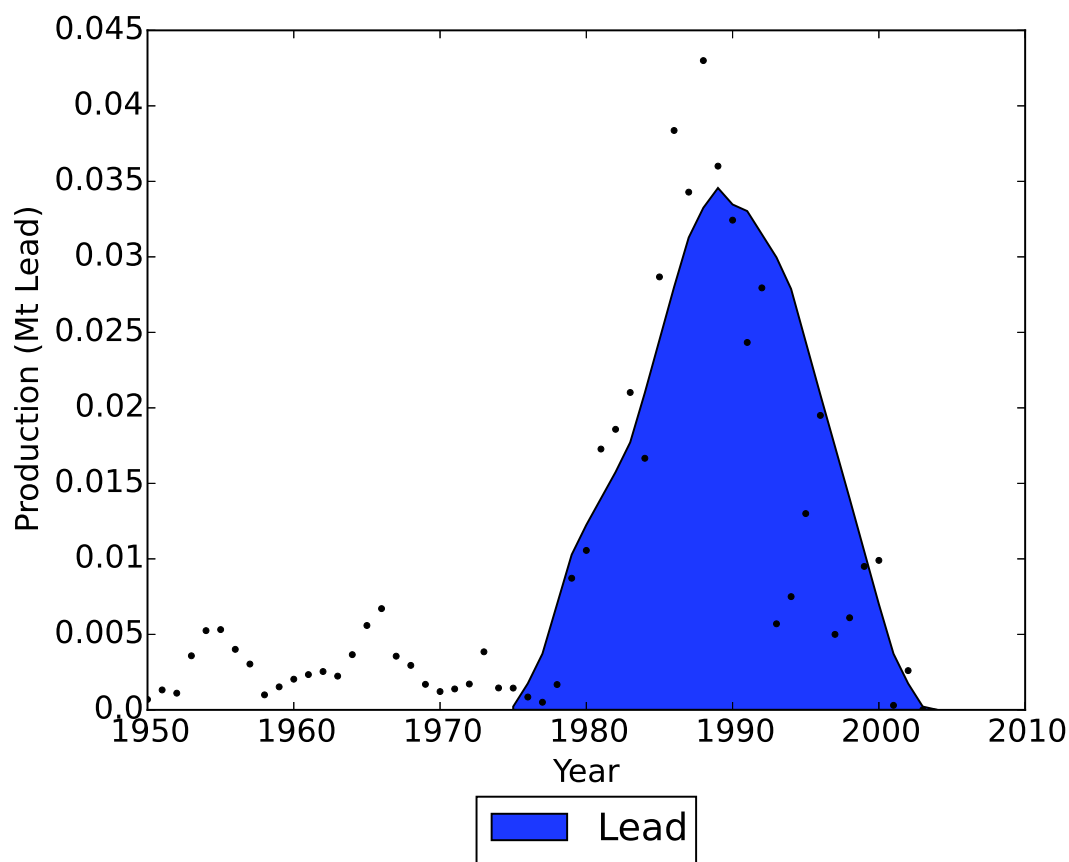

Figure 2.37: Thailand projections capped at 16

| Table 2.37: Peak years - All |      |           |           |
|------------------------------|------|-----------|-----------|
| Name                         | URR  | Peak Year | Peak Rate |
| Lead                         | 0.51 | 1989      | 0.03      |
| Total                        | 0.51 | 1989      | 0.03      |

2.19.2 By Mineral

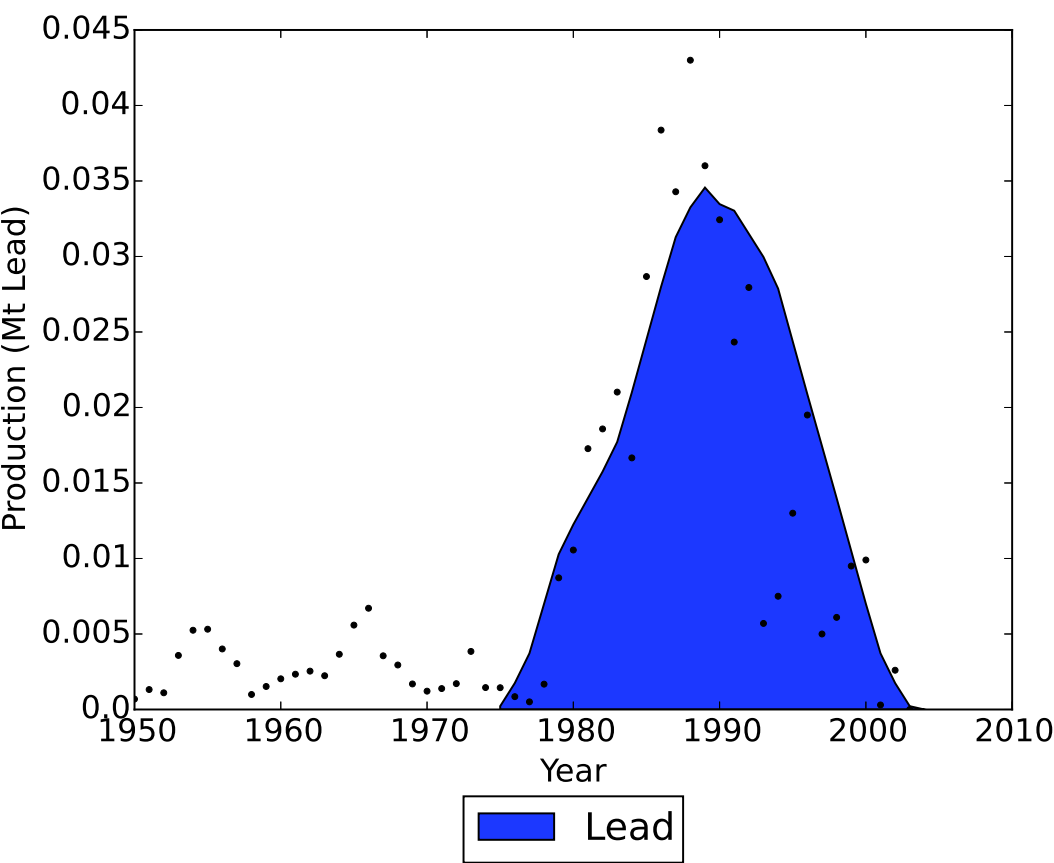

Figure 2.38: Thailand projection by mineral type

| Table 2.38: Peak years - Minerals |      |           |           |
|-----------------------------------|------|-----------|-----------|
| Name                              | URR  | Peak Year | Peak Rate |
| Lead                              | 0.51 | 1989      | 0.03      |
| Total                             | 0.51 | 1989      | 0.03      |

2.20 Vietnam

2.20.1 All Projections

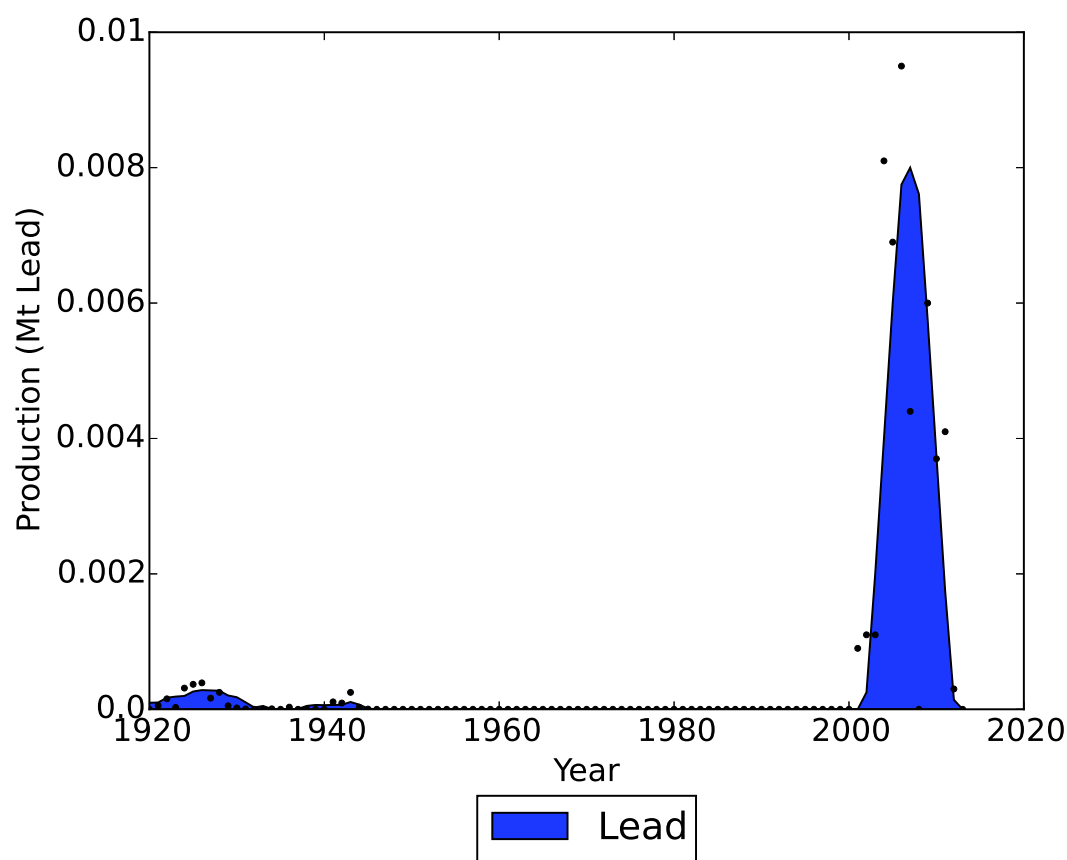

Figure 2.39: Vietnam projections capped at 16

| Table 2.39: Peak years - All |             |             |             |
|------------------------------|-------------|-------------|-------------|
| Name                         | URR         | Peak Year   | Peak Rate   |
| Lead                         | 0.05        | 2007        | 0.01        |
| <b>Total</b>                 | <b>0.05</b> | <b>2007</b> | <b>0.01</b> |

2.20.2 By Mineral

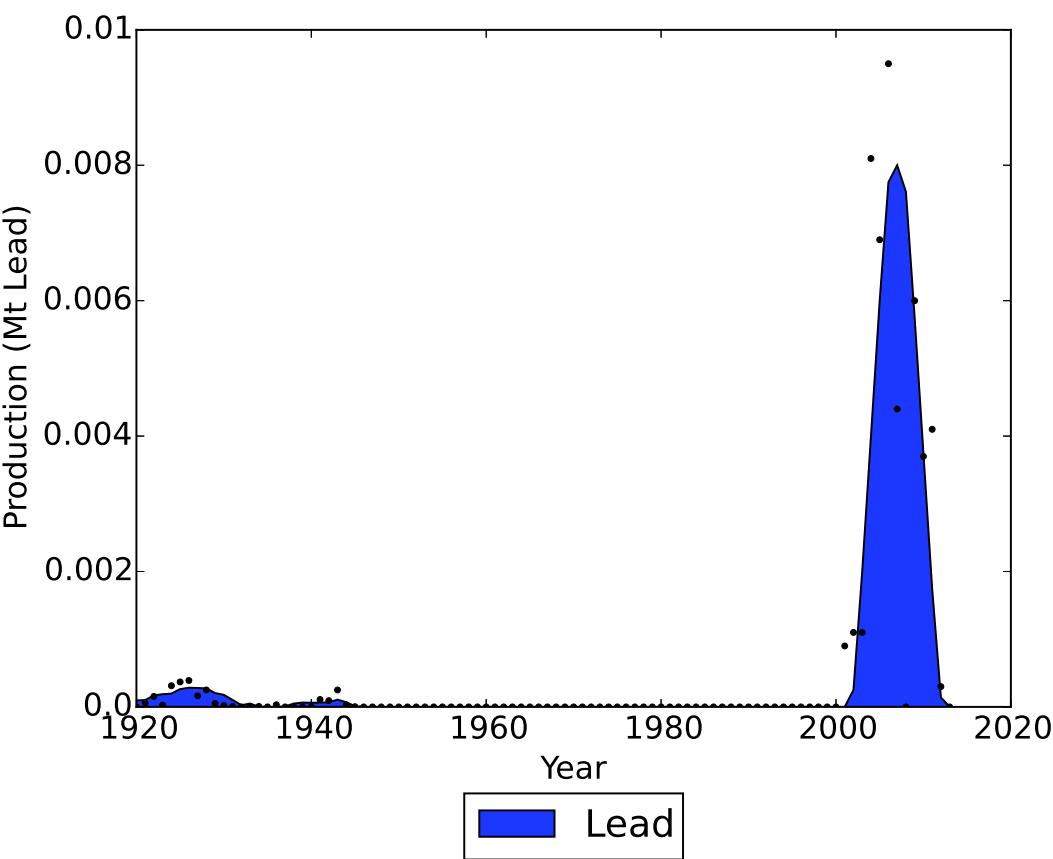

Figure 2.40: Vietnam projection by mineral type

| Table 2.40: Peak years - Minerals |             |             |             |
|-----------------------------------|-------------|-------------|-------------|
| Name                              | URR         | Peak Year   | Peak Rate   |
| Lead                              | 0.05        | 2007        | 0.01        |
| <b>Total</b>                      | <b>0.05</b> | <b>2007</b> | <b>0.01</b> |



2.21 Yemen

2.21.1 All Projections

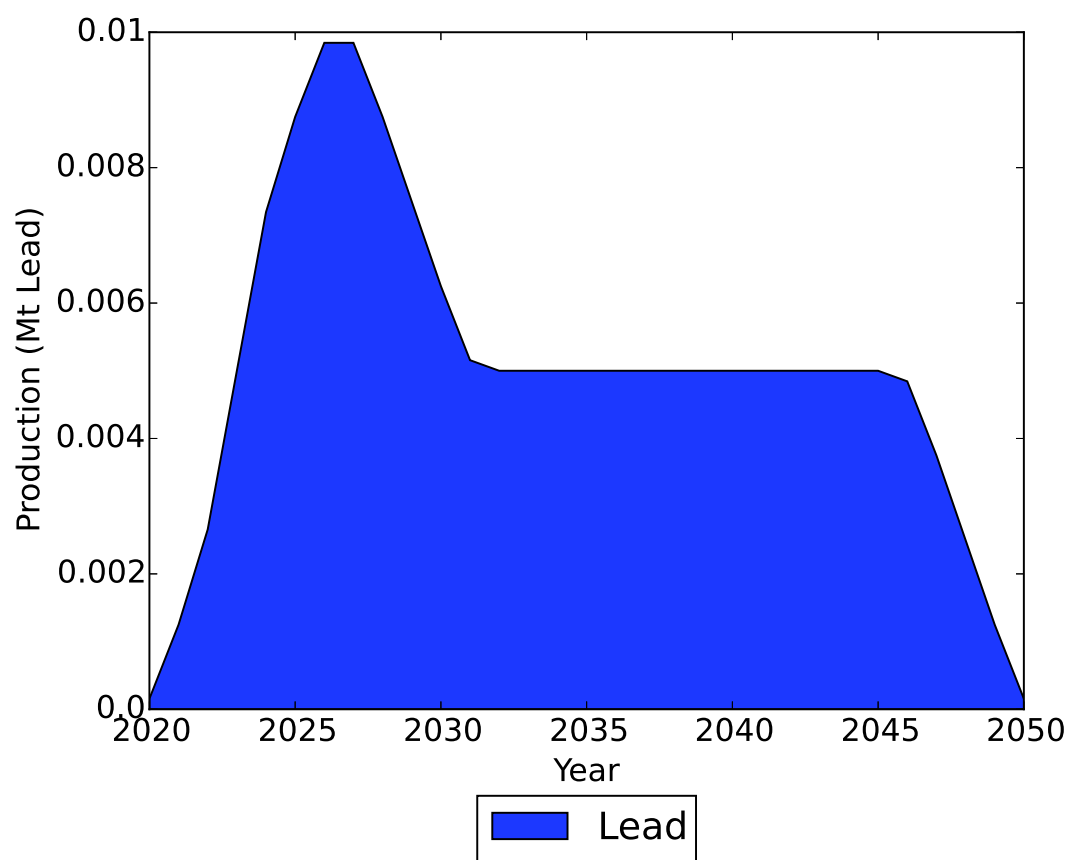

Figure 2.41: Yemen projections capped at 16

| Table 2.41: Peak years - All |      |           |           |
|------------------------------|------|-----------|-----------|
| Name                         | URR  | Peak Year | Peak Rate |
| Lead                         | 0.16 | 2026      | 0.01      |
| Total                        | 0.16 | 2026      | 0.01      |

2.21.2 By Mineral

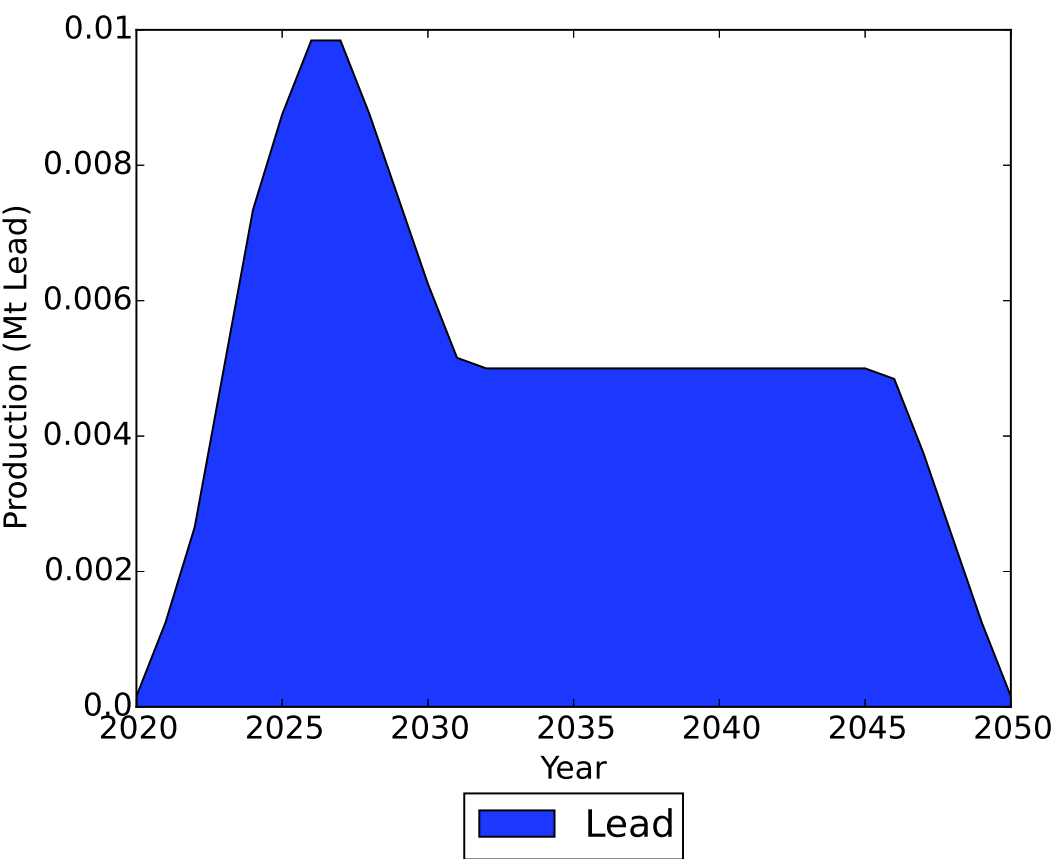

Figure 2.42: Yemen projection by mineral type

| Table 2.42: Peak years - Minerals |      |           |           |
|-----------------------------------|------|-----------|-----------|
| Name                              | URR  | Peak Year | Peak Rate |
| Lead                              | 0.16 | 2026      | 0.01      |
| Total                             | 0.16 | 2026      | 0.01      |

2.22 Total

2.22.1 By country

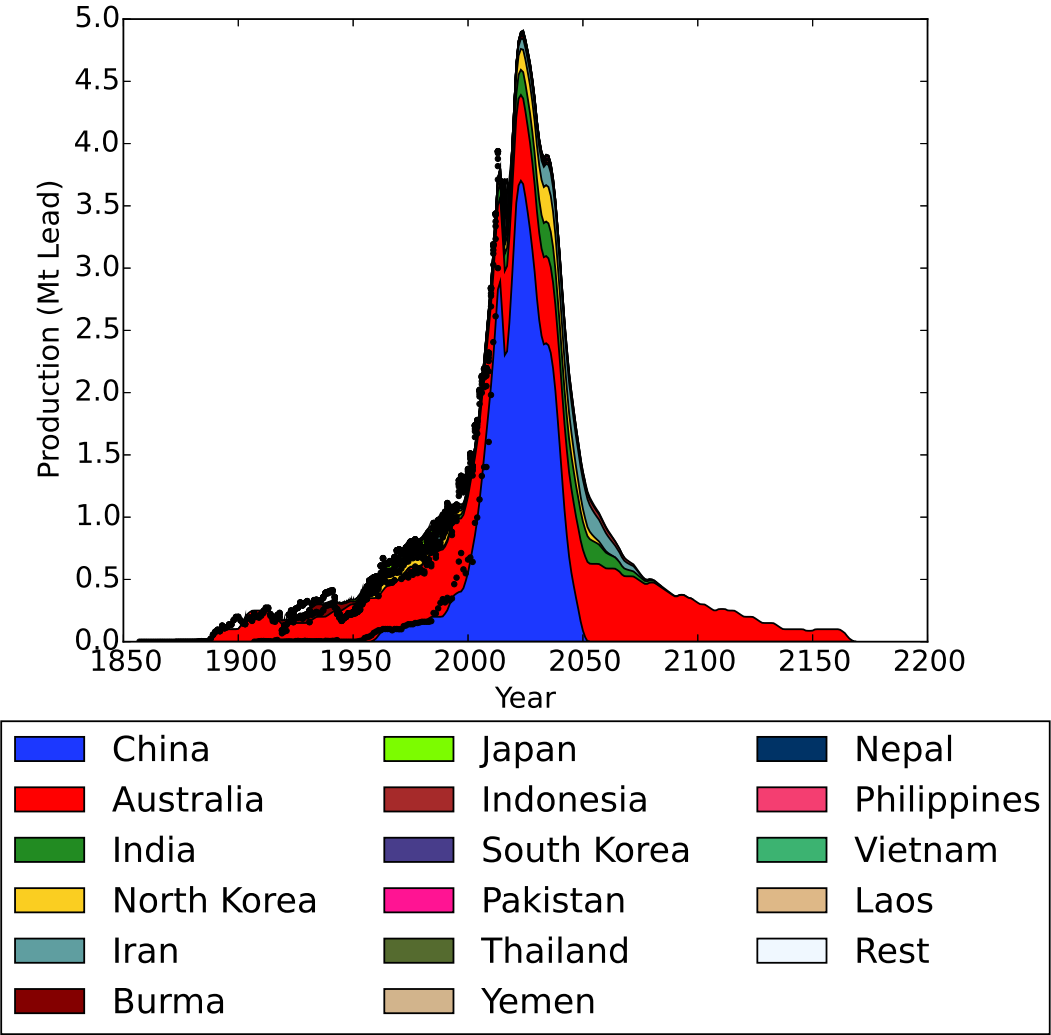

Figure 2.43: Asia projections by country

2.22.2 By mineral

Table 2.43: Peak years - All

| Name          | URR           | Peak Year   | Peak Rate   |
|---------------|---------------|-------------|-------------|
| China         | 109.04        | 2023        | 3.7         |
| Australia     | 102.23        | 2028        | 0.7         |
| India         | 12.93         | 2038        | 0.29        |
| North Korea   | 11.18         | 2034        | 0.29        |
| Iran          | 9.87          | 2045        | 0.25        |
| Burma         | 3.03          | 1933        | 0.1         |
| Japan         | 2.22          | 1975        | 0.07        |
| Indonesia     | 1.51          | 2047        | 0.04        |
| South Korea   | 0.66          | 1981        | 0.01        |
| Pakistan      | 0.64          | 2044        | 0.02        |
| Thailand      | 0.51          | 1989        | 0.03        |
| Yemen         | 0.16          | 2026        | 0.01        |
| Nepal         | 0.07          | 2025        | –           |
| Philippines   | 0.06          | 1976        | –           |
| Vietnam       | 0.05          | 2007        | 0.01        |
| Laos          | 0.05          | 2024        | –           |
| Saudi Arabia  | 0.02          | 2027        | –           |
| New Caledonia | 0.01          | 1891        | –           |
| Hong Kong     | –             | 1952        | –           |
| PNG           | –             | 2025        | –           |
| Malaysia      | –             | 1935        | –           |
| <b>Total</b>  | <b>254.23</b> | <b>2024</b> | <b>4.91</b> |

Table 2.44: Peak years - Minerals

| Name         | URR           | Peak Year   | Peak Rate   |
|--------------|---------------|-------------|-------------|
| Lead Lead    | 254.23        | 2024        | 4.91        |
| <b>Total</b> | <b>254.23</b> | <b>2024</b> | <b>4.91</b> |

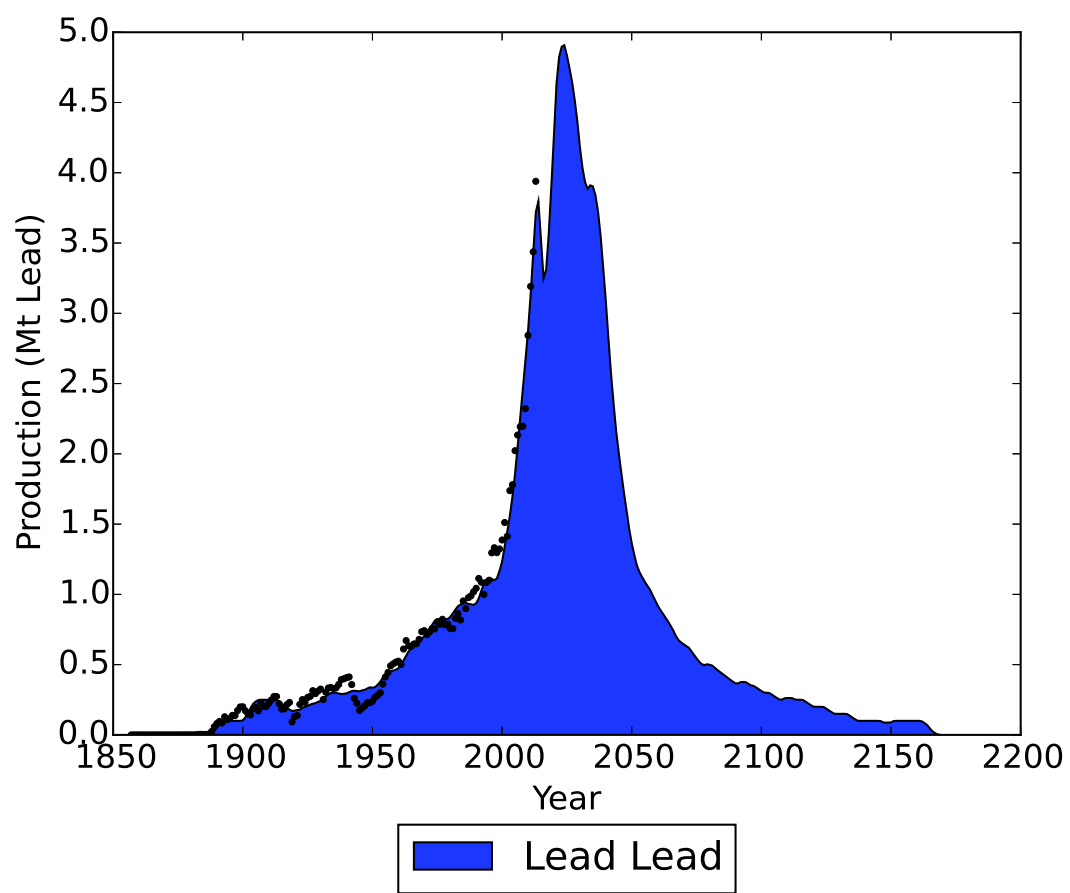

Figure 2.44: Asia projection by mineral type

## Chapter 3

# Central America

### 3.1 Cuba

#### 3.1.1 All Projections

Table 3.1: Peak years - All

| <b>Name</b>  | <b>URR</b>  | <b>Peak Year</b> | <b>Peak Rate</b> |
|--------------|-------------|------------------|------------------|
| Lead         | 0.42        | 2055             | 0.01             |
| <b>Total</b> | <b>0.42</b> | <b>2055</b>      | <b>0.01</b>      |

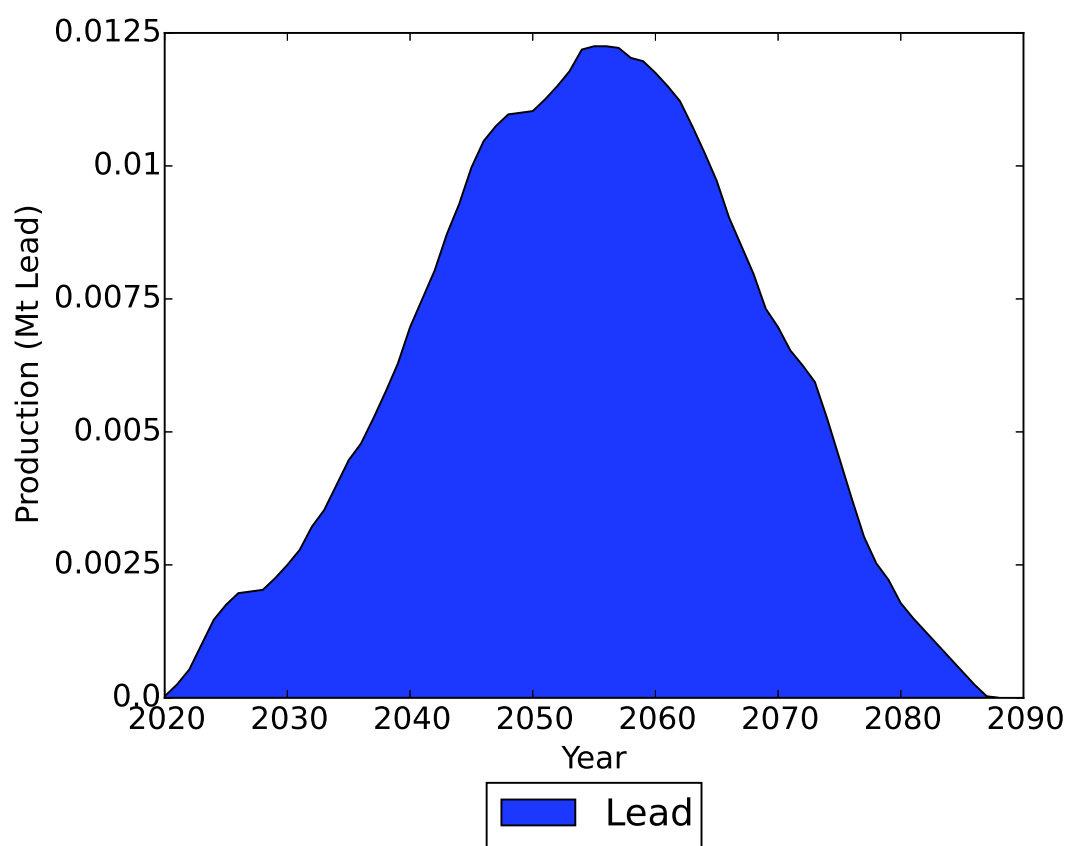

Figure 3.1: Cuba projections capped at 16

3.1.2 By Mineral

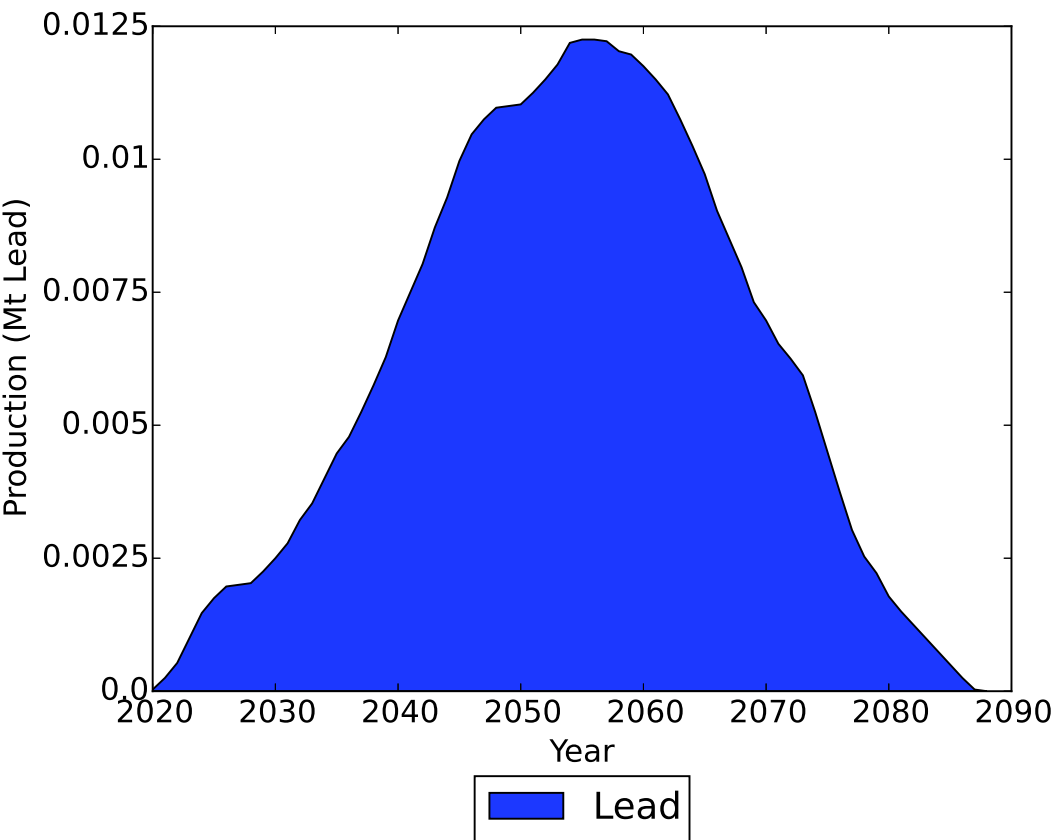

Figure 3.2: Cuba projection by mineral type

Table 3.2: Peak years - Minerals

| Name  | URR  | Peak Year | Peak Rate |
|-------|------|-----------|-----------|
| Lead  | 0.42 | 2055      | 0.01      |
| Total | 0.42 | 2055      | 0.01      |



## 3.2 Guatemala

### 3.2.1 All Projections

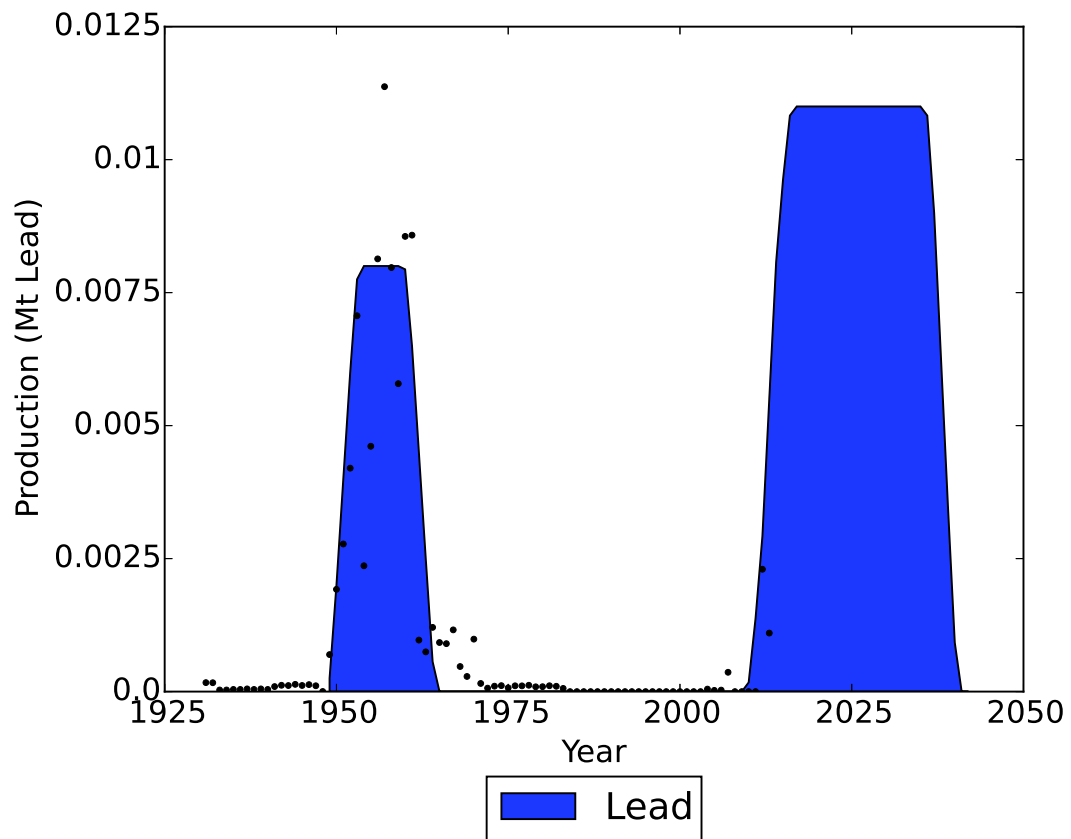

Figure 3.3: Guatemala projections capped at 16

| Table 3.3: Peak years - All |             |             |             |
|-----------------------------|-------------|-------------|-------------|
| Name                        | URR         | Peak Year   | Peak Rate   |
| Lead                        | 0.37        | 2017        | 0.01        |
| <b>Total</b>                | <b>0.37</b> | <b>2017</b> | <b>0.01</b> |

### 3.2.2 By Mineral

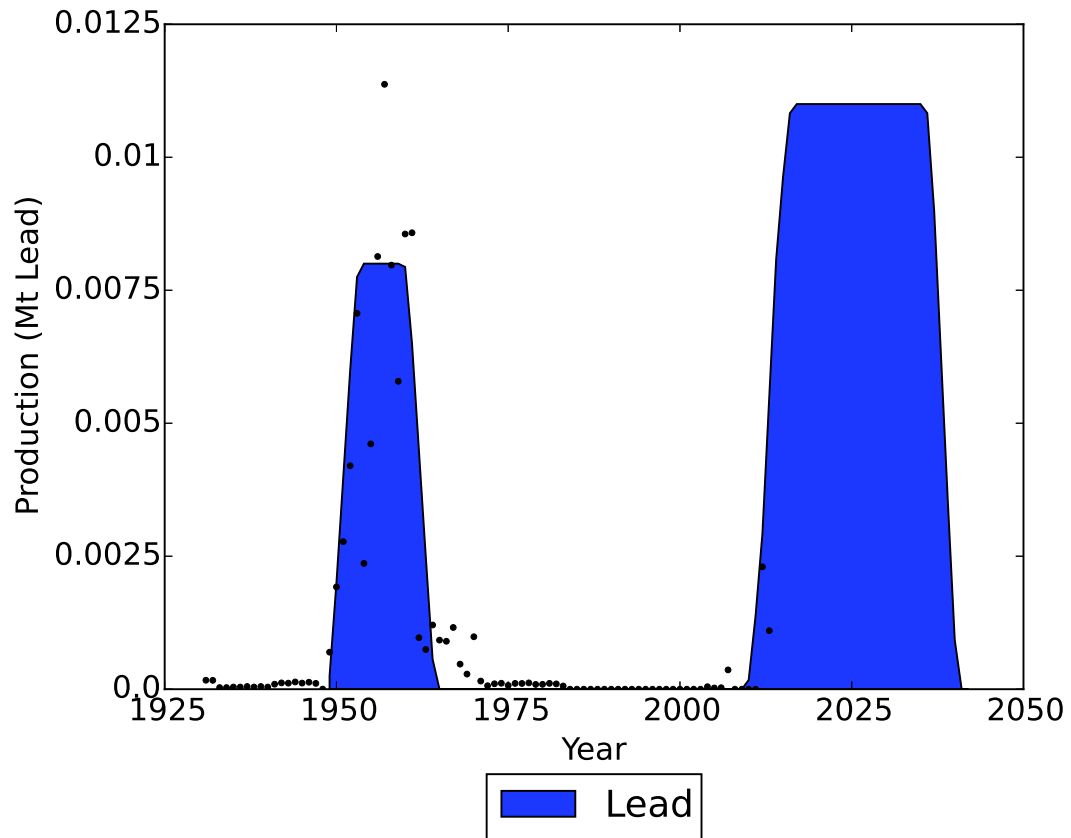

Figure 3.4: Guatemala projection by mineral type

| Table 3.4: Peak years - Minerals |             |             |             |
|----------------------------------|-------------|-------------|-------------|
| Name                             | URR         | Peak Year   | Peak Rate   |
| Lead                             | 0.37        | 2017        | 0.01        |
| <b>Total</b>                     | <b>0.37</b> | <b>2017</b> | <b>0.01</b> |

### 3.3 Honduras

#### 3.3.1 All Projections

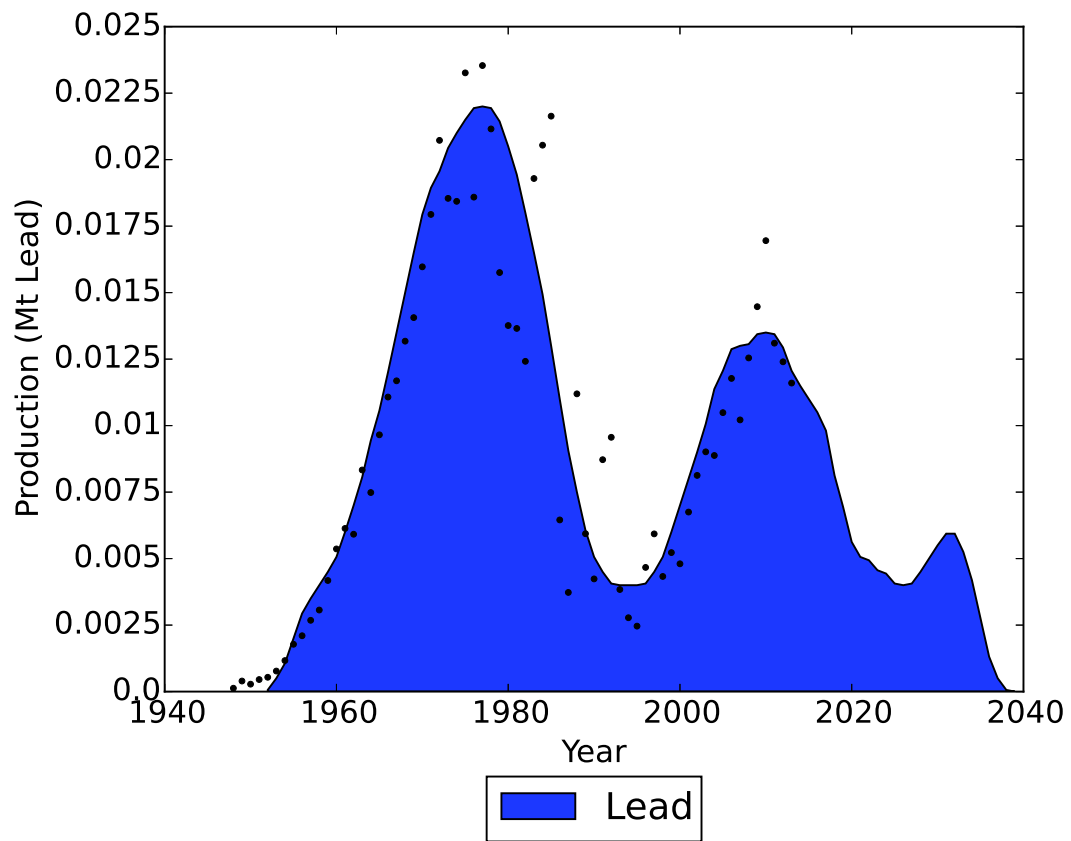

Figure 3.5: Honduras projections capped at 16

| Table 3.5: Peak years - All |             |             |             |
|-----------------------------|-------------|-------------|-------------|
| Name                        | URR         | Peak Year   | Peak Rate   |
| Lead                        | 0.81        | 1977        | 0.02        |
| <b>Total</b>                | <b>0.81</b> | <b>1977</b> | <b>0.02</b> |

3.3.2 By Mineral

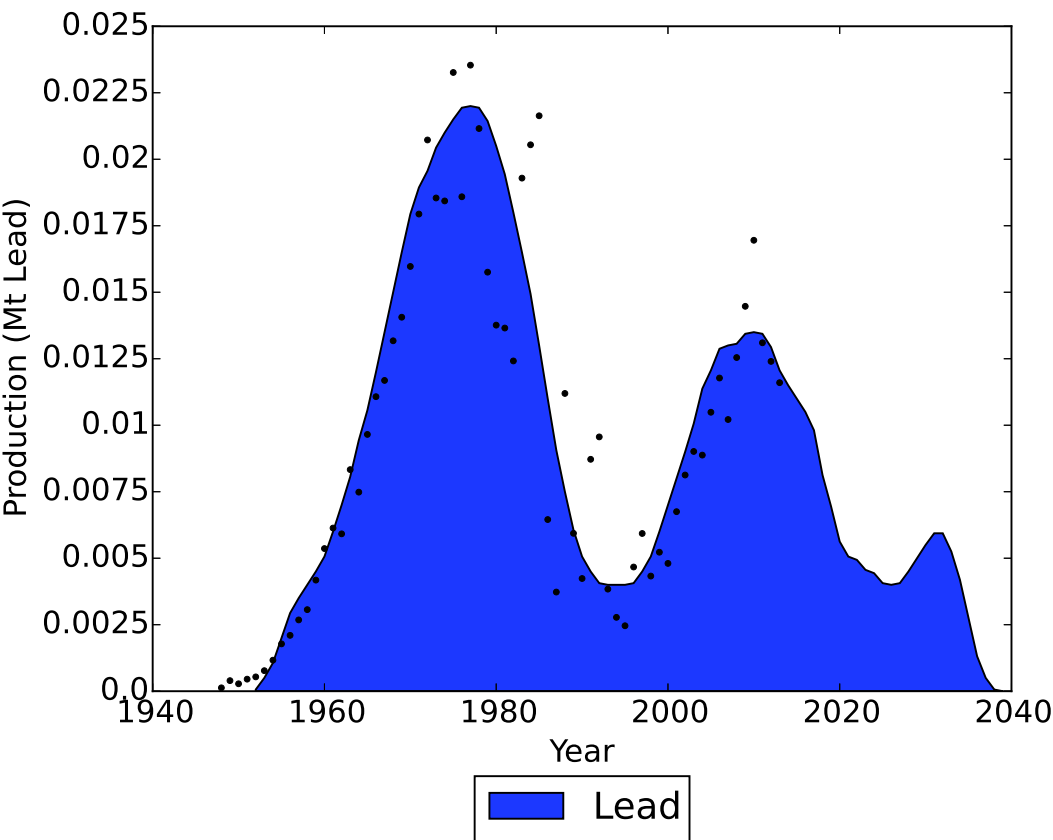

Figure 3.6: Honduras projection by mineral type

| Table 3.6: Peak years - Minerals |      |           |           |
|----------------------------------|------|-----------|-----------|
| Name                             | URR  | Peak Year | Peak Rate |
| Lead                             | 0.81 | 1977      | 0.02      |
| Total                            | 0.81 | 1977      | 0.02      |

### 3.4 Mexico

#### 3.4.1 All Projections

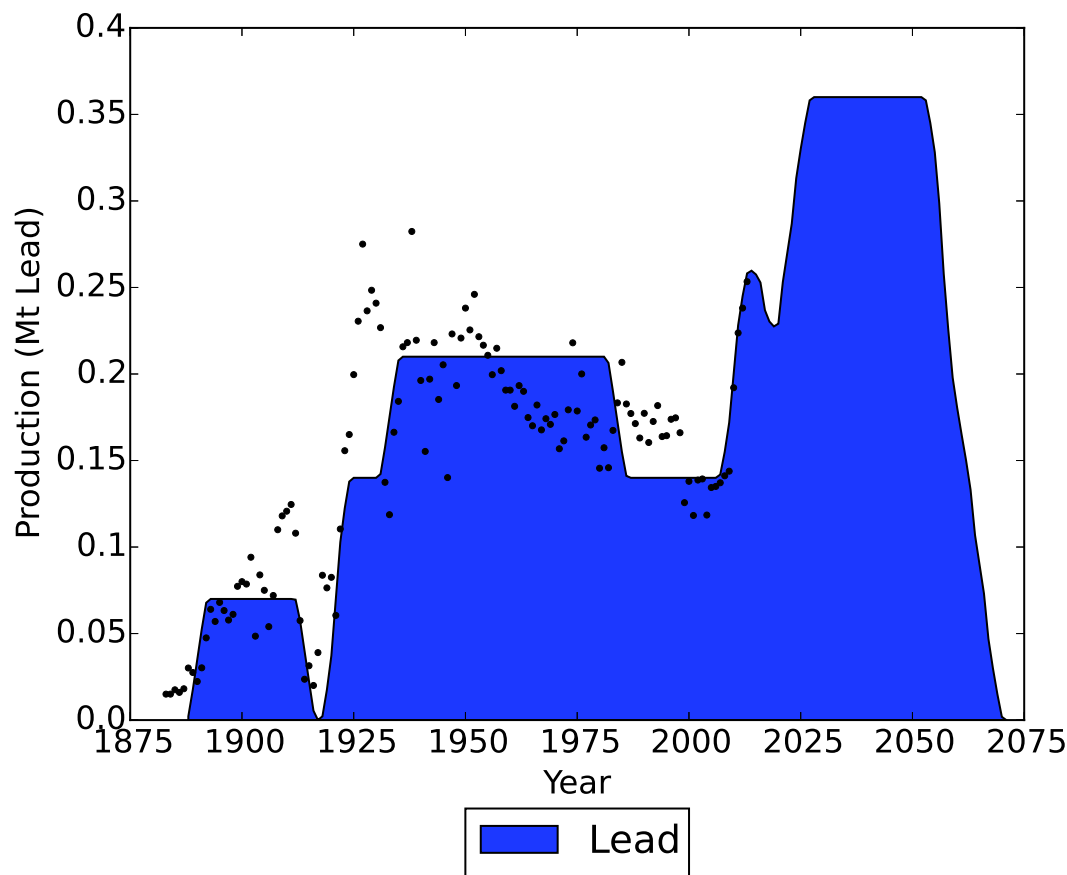

Figure 3.7: Mexico projections capped at 16

| Table 3.7: Peak years - All |       |           |           |
|-----------------------------|-------|-----------|-----------|
| Name                        | URR   | Peak Year | Peak Rate |
| Lead                        | 34.48 | 2048      | 0.36      |
| Total                       | 34.48 | 2048      | 0.36      |

3.4.2 By Mineral

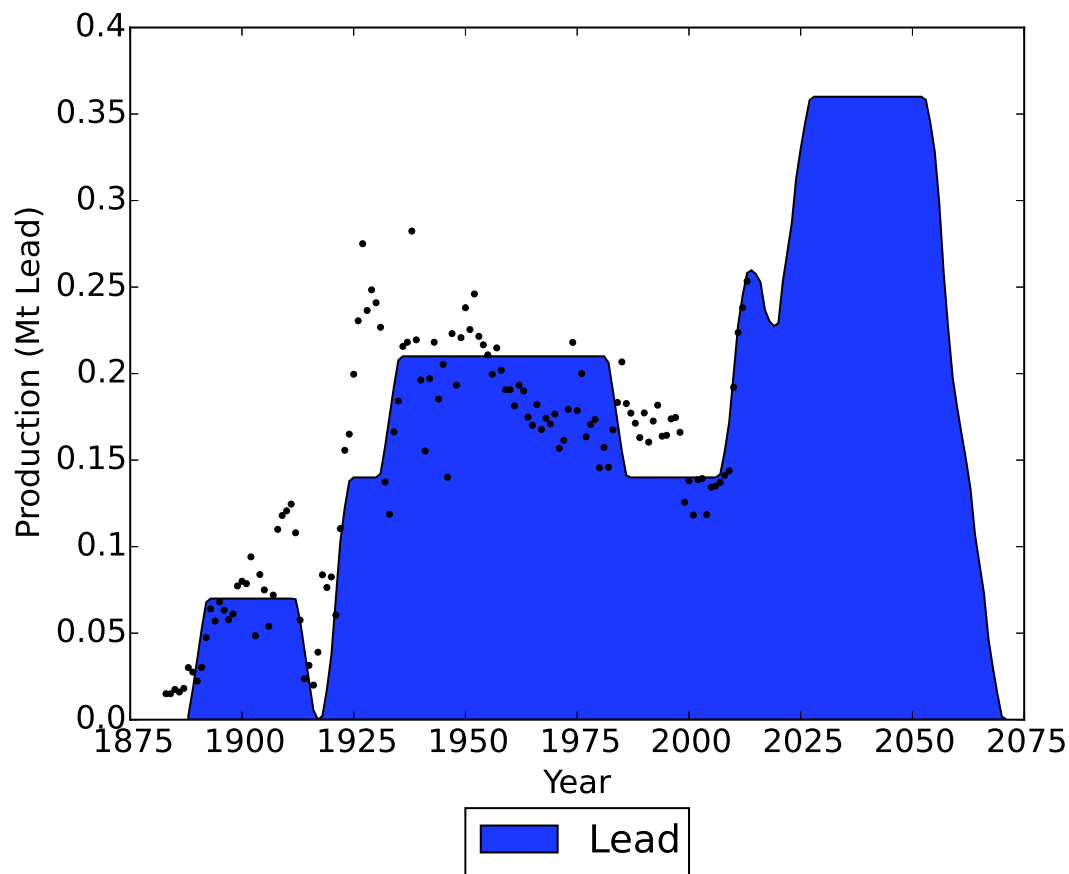

Figure 3.8: Mexico projection by mineral type

| Table 3.8: Peak years - Minerals |       |           |           |
|----------------------------------|-------|-----------|-----------|
| Name                             | URR   | Peak Year | Peak Rate |
| Lead                             | 34.48 | 2048      | 0.36      |
| Total                            | 34.48 | 2048      | 0.36      |

3.5 Total

3.5.1 By country

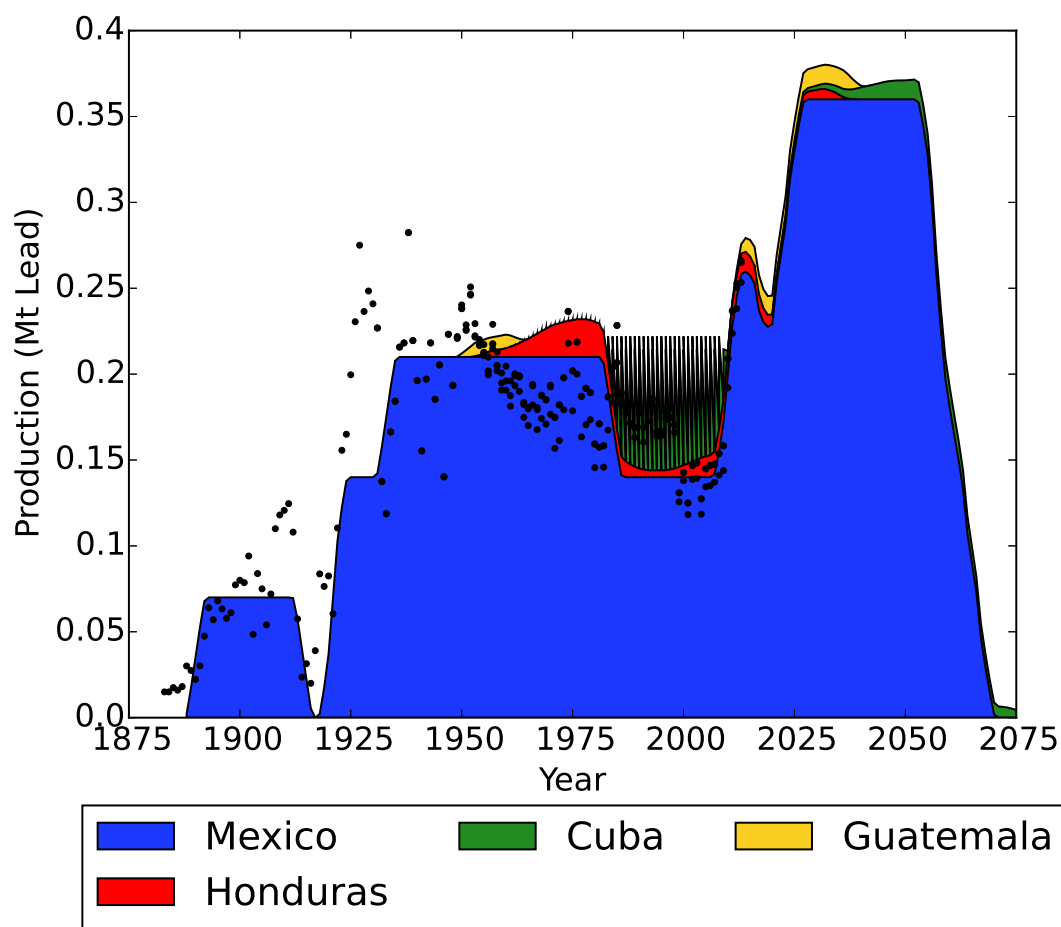

Figure 3.9: Central America projections by country

3.5.2 By mineral

Table 3.9: Peak years - All

| Name         | URR          | Peak Year   | Peak Rate   |
|--------------|--------------|-------------|-------------|
| Mexico       | 34.48        | 2048        | 0.36        |
| Honduras     | 0.81         | 1977        | 0.02        |
| Cuba         | 0.42         | 2055        | 0.01        |
| Guatemala    | 0.37         | 2017        | 0.01        |
| <b>Total</b> | <b>36.08</b> | <b>2032</b> | <b>0.38</b> |

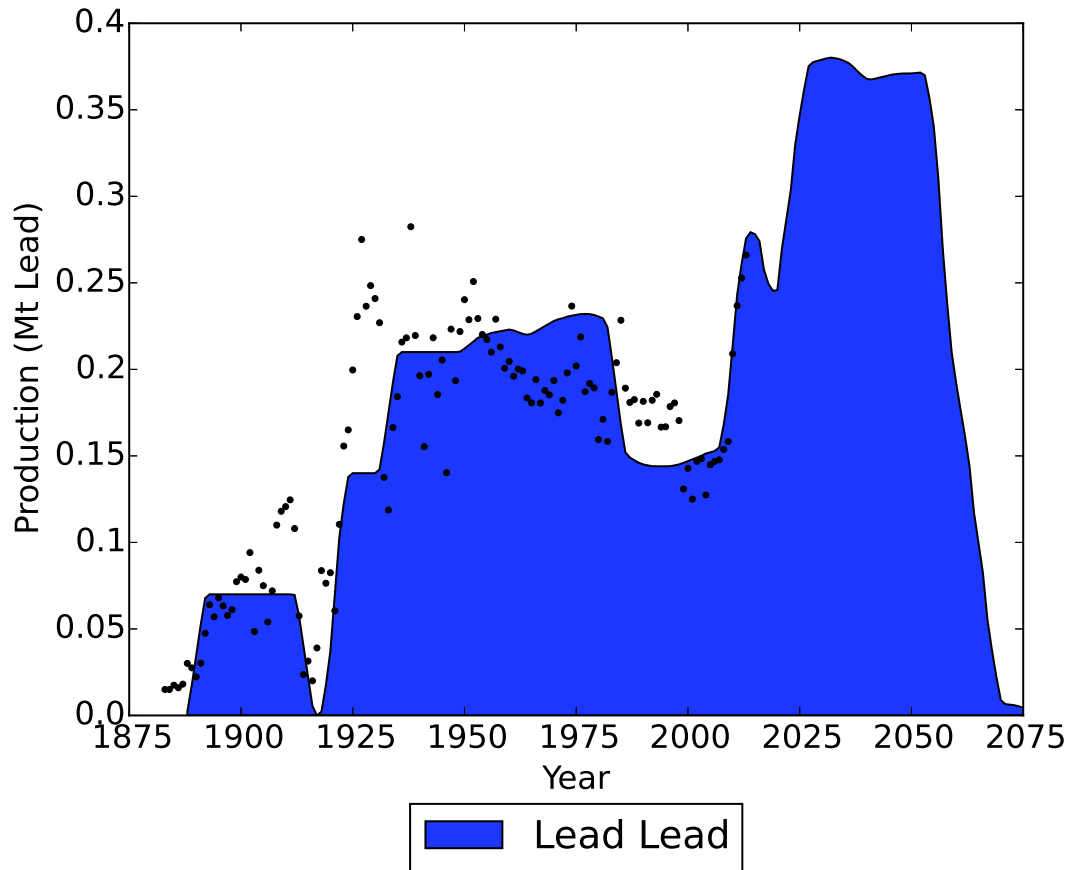

Figure 3.10: Central America projection by mineral type

Table 3.10: Peak years - Minerals

| Name         | URR          | Peak Year   | Peak Rate   |
|--------------|--------------|-------------|-------------|
| Lead Lead    | 36.08        | 2032        | 0.38        |
| <b>Total</b> | <b>36.08</b> | <b>2032</b> | <b>0.38</b> |



## Chapter 4

# Europe

### 4.1 Austria

#### 4.1.1 All Projections

Table 4.1: Peak years - All

| <b>Name</b>  | <b>URR</b>  | <b>Peak Year</b> | <b>Peak Rate</b> |
|--------------|-------------|------------------|------------------|
| Lead         | 1.21        | 1917             | 0.03             |
| <b>Total</b> | <b>1.21</b> | <b>1917</b>      | <b>0.03</b>      |

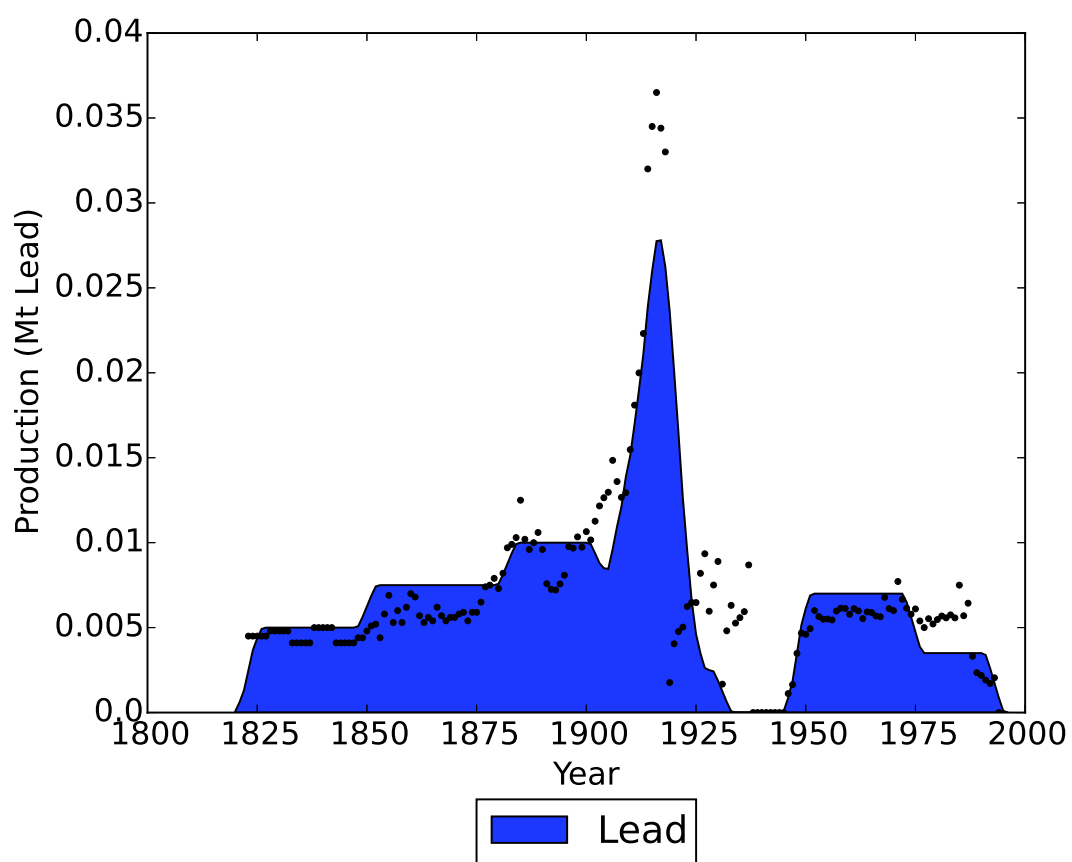

Figure 4.1: Austria projections capped at 16

4.1.2 By Mineral

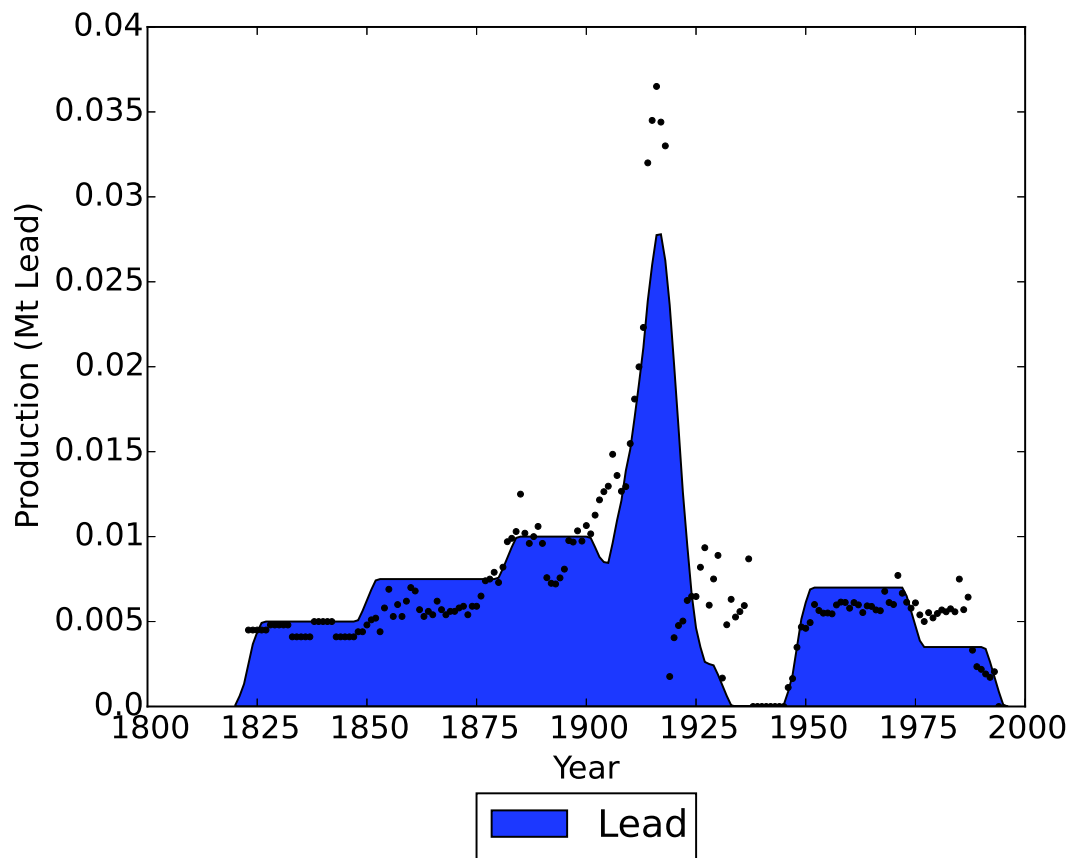

Figure 4.2: Austria projection by mineral type

| Table 4.2: Peak years - Minerals |      |           |           |
|----------------------------------|------|-----------|-----------|
| Name                             | URR  | Peak Year | Peak Rate |
| Lead                             | 1.21 | 1917      | 0.03      |
| Total                            | 1.21 | 1917      | 0.03      |

## 4.2 Bosnia and Herzegovina

### 4.2.1 All Projections

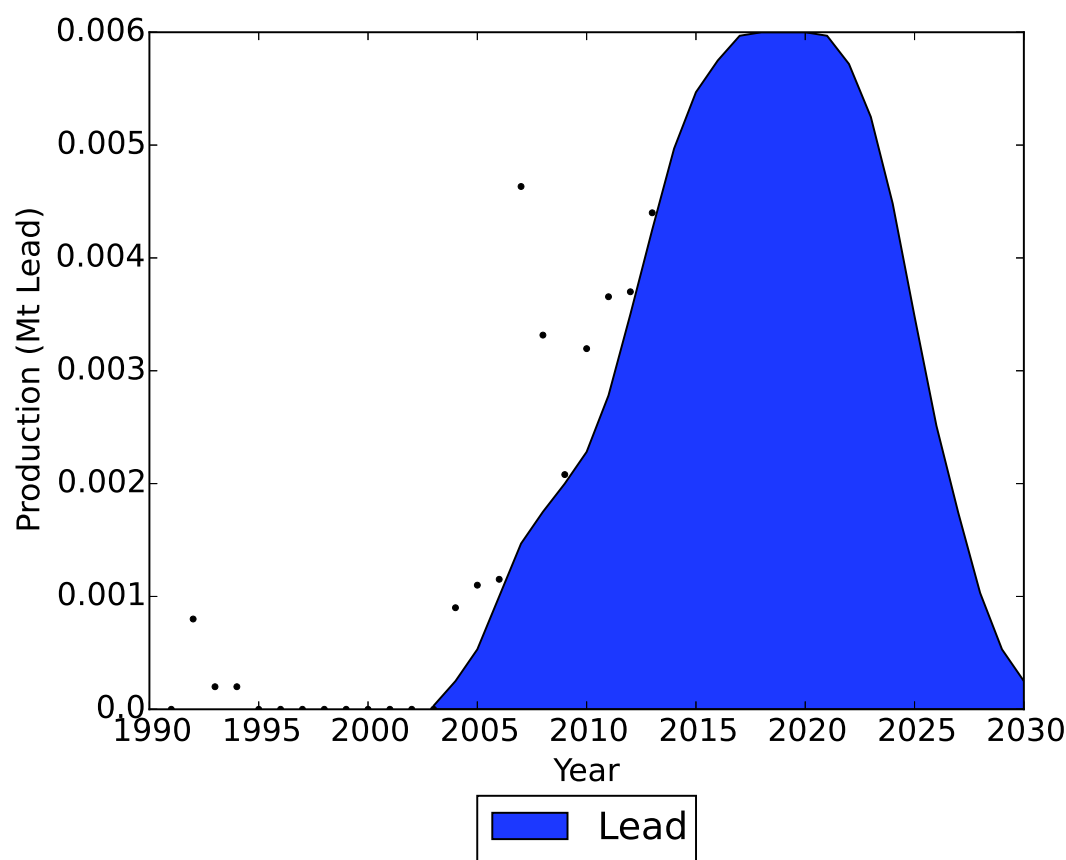

Figure 4.3: Bosnia and Herzegovina projections capped at 16

| Table 4.3: Peak years - All |             |             |             |
|-----------------------------|-------------|-------------|-------------|
| Name                        | URR         | Peak Year   | Peak Rate   |
| Lead                        | 0.09        | 2018        | 0.01        |
| <b>Total</b>                | <b>0.09</b> | <b>2018</b> | <b>0.01</b> |

4.2.2 By Mineral

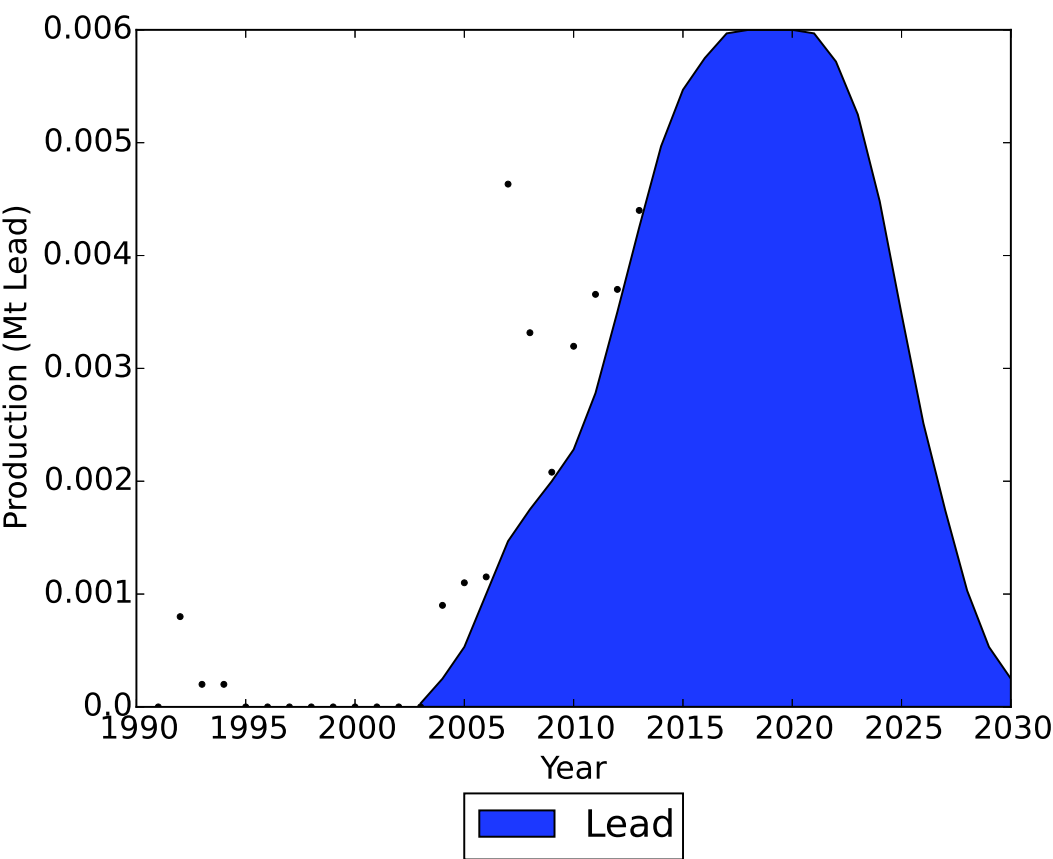

Figure 4.4: Bosnia and Herzegovina projection by mineral type

| Table 4.4: Peak years - Minerals |      |           |           |
|----------------------------------|------|-----------|-----------|
| Name                             | URR  | Peak Year | Peak Rate |
| Lead                             | 0.09 | 2018      | 0.01      |
| Total                            | 0.09 | 2018      | 0.01      |

# 4.3 Bulgaria

## 4.3.1 All Projections

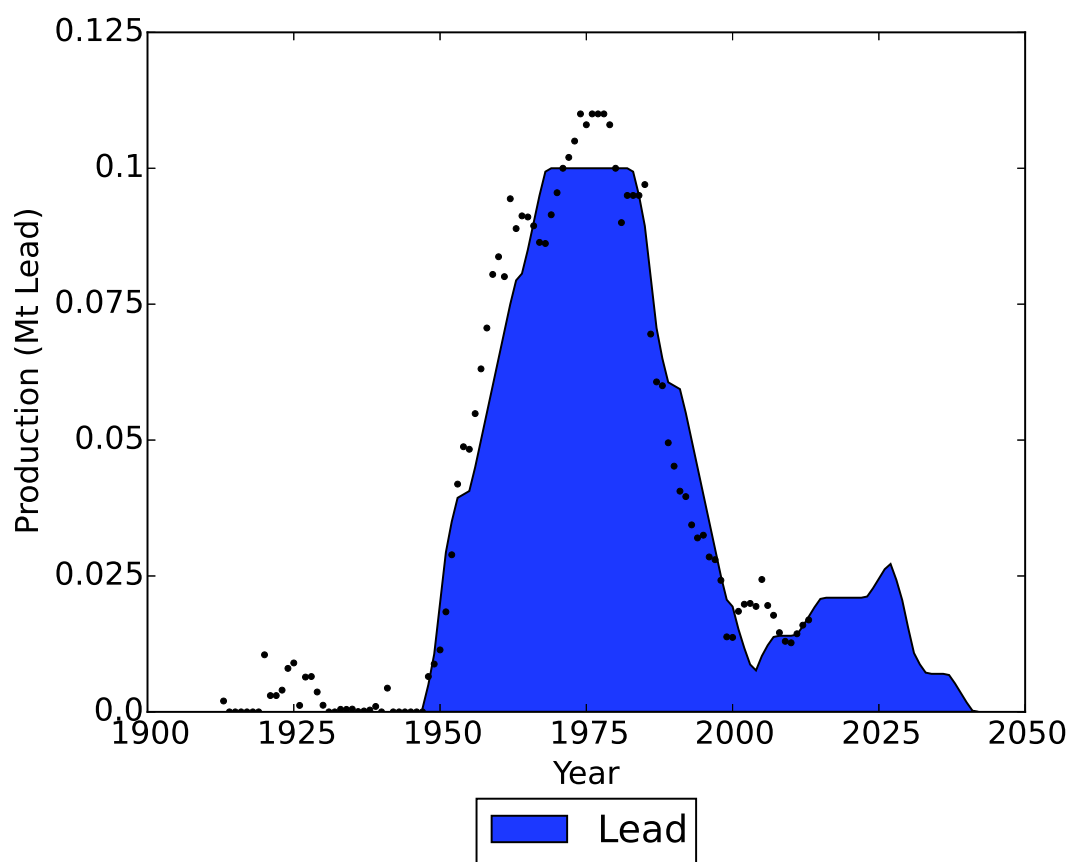

Figure 4.5: Bulgaria projections capped at 16

| Table 4.5: Peak years - All |      |           |           |
|-----------------------------|------|-----------|-----------|
| Name                        | URR  | Peak Year | Peak Rate |
| Lead                        | 4.17 | 1969      | 0.1       |
| Total                       | 4.17 | 1969      | 0.1       |

4.3.2 By Mineral

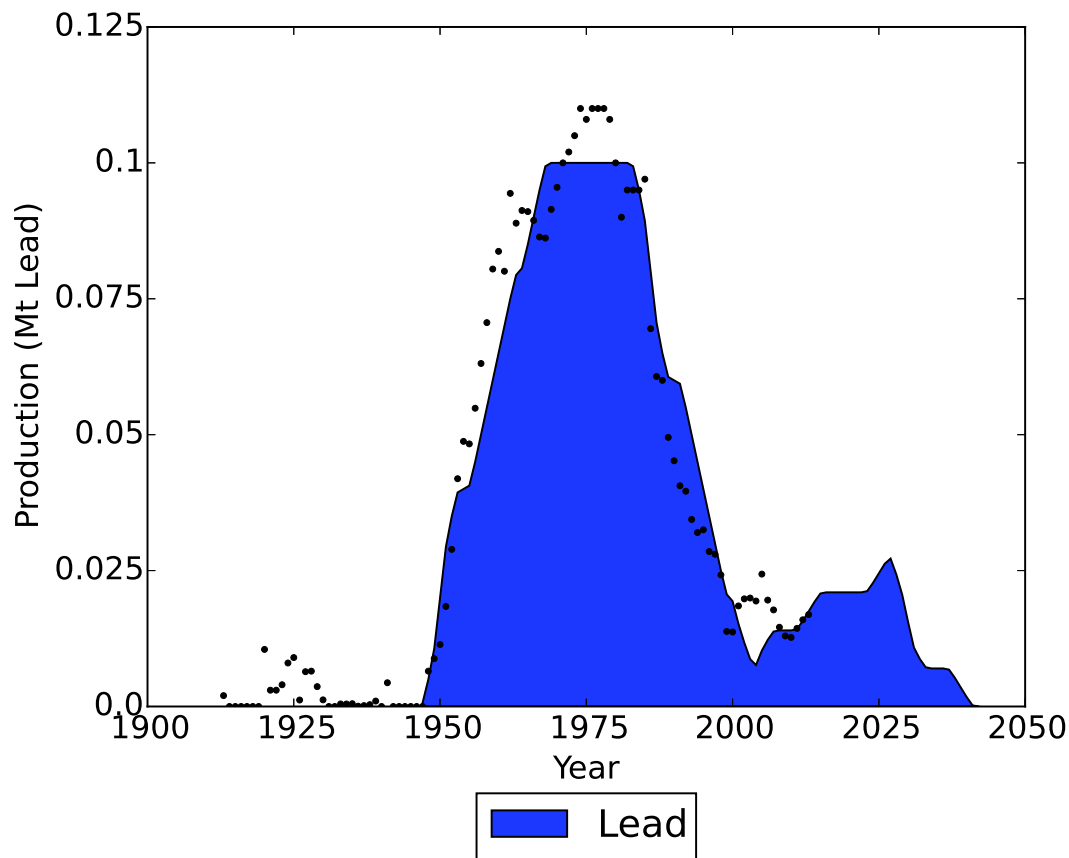

Figure 4.6: Bulgaria projection by mineral type

| Table 4.6: Peak years - Minerals |             |             |            |
|----------------------------------|-------------|-------------|------------|
| Name                             | URR         | Peak Year   | Peak Rate  |
| Lead                             | 4.17        | 1969        | 0.1        |
| <b>Total</b>                     | <b>4.17</b> | <b>1969</b> | <b>0.1</b> |

# 4.4 Czechoslovakia

## 4.4.1 All Projections

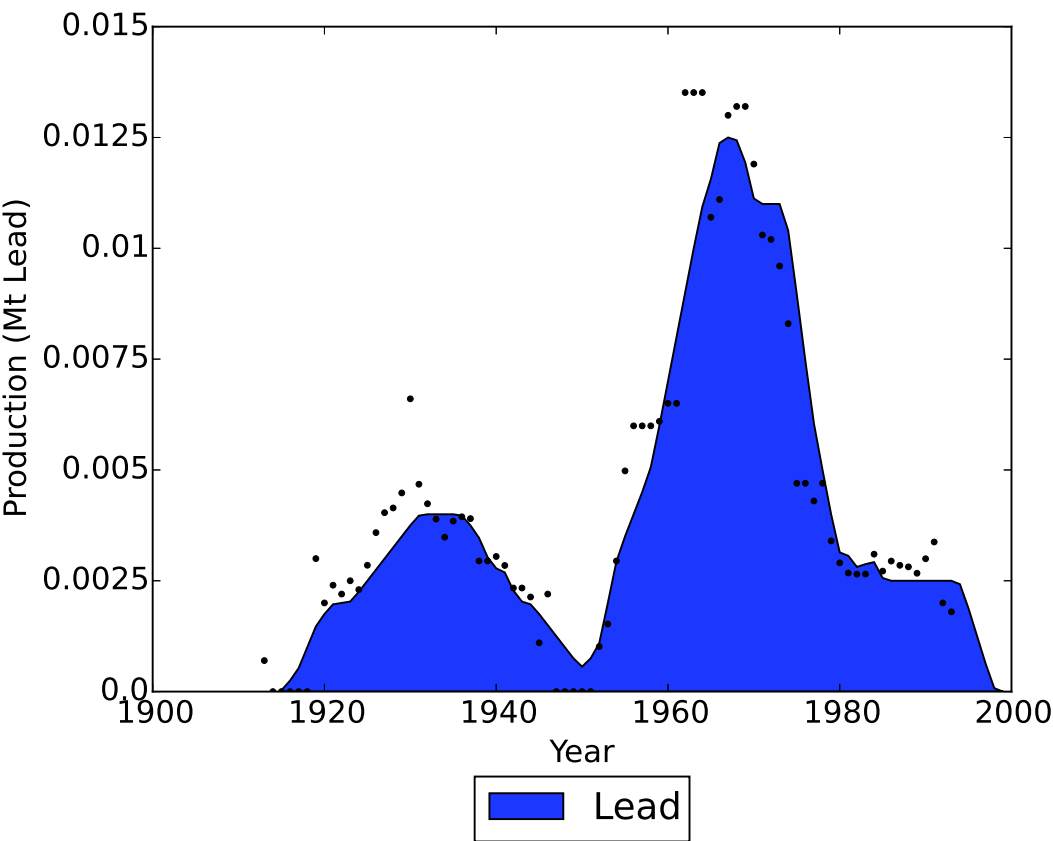

Figure 4.7: Czechoslovakia projections capped at 16

| Table 4.7: Peak years - All |             |             |             |
|-----------------------------|-------------|-------------|-------------|
| Name                        | URR         | Peak Year   | Peak Rate   |
| Lead                        | 0.35        | 1967        | 0.01        |
| <b>Total</b>                | <b>0.35</b> | <b>1967</b> | <b>0.01</b> |



4.4.2 By Mineral

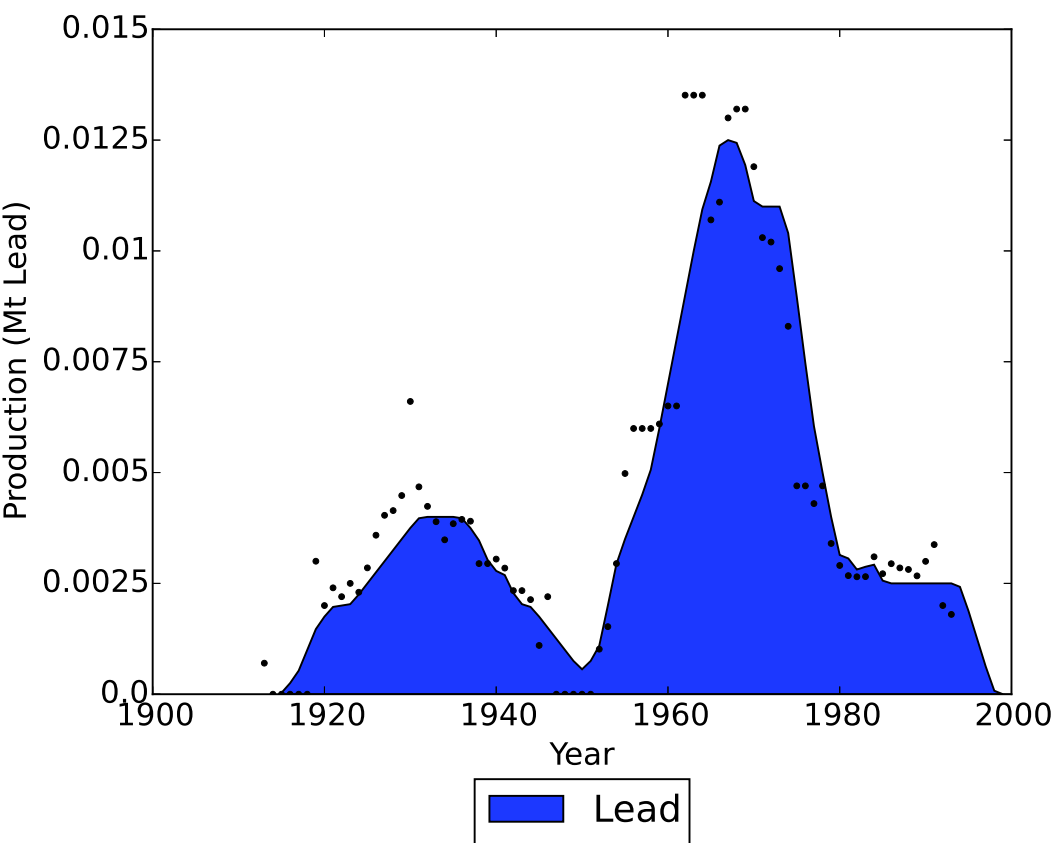

Figure 4.8: Czechoslovakia projection by mineral type

| Table 4.8: Peak years - Minerals |      |           |           |
|----------------------------------|------|-----------|-----------|
| Name                             | URR  | Peak Year | Peak Rate |
| Lead                             | 0.35 | 1967      | 0.01      |
| Total                            | 0.35 | 1967      | 0.01      |

# 4.5 Finland

## 4.5.1 All Projections

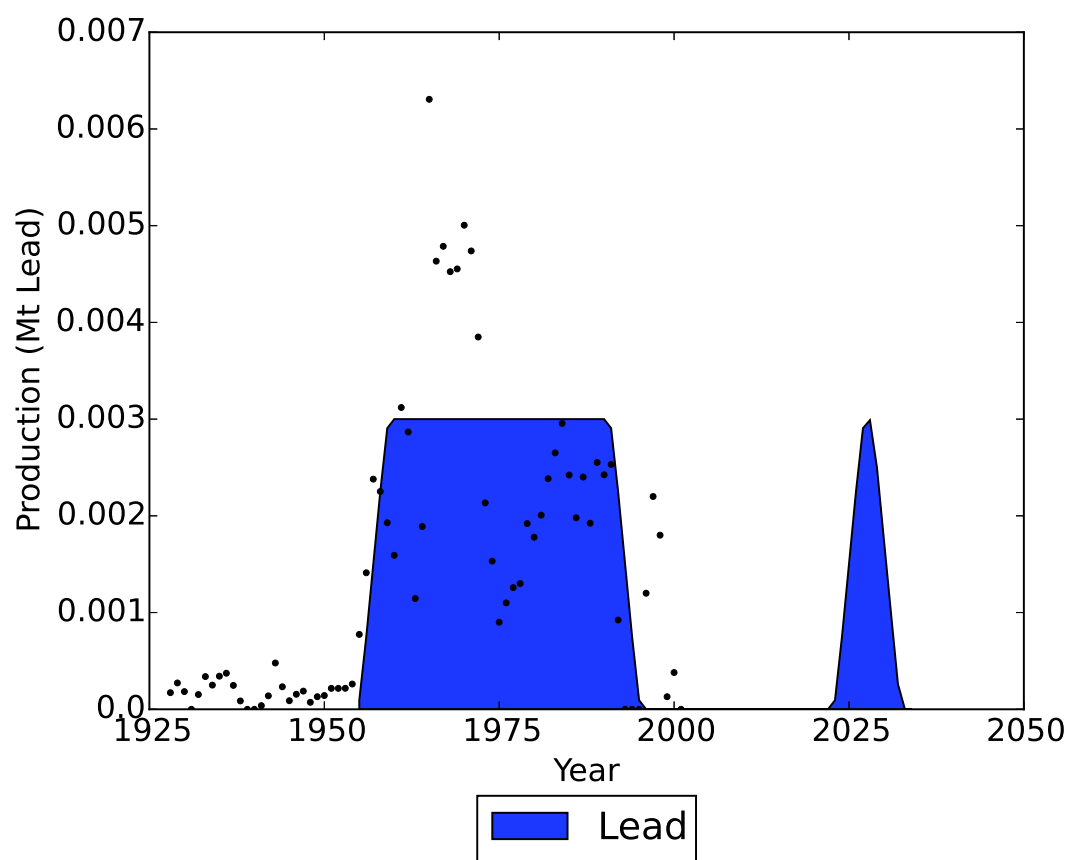

Figure 4.9: Finland projections capped at 16

| Table 4.9: Peak years - All |      |           |           |
|-----------------------------|------|-----------|-----------|
| Name                        | URR  | Peak Year | Peak Rate |
| Lead                        | 0.12 | 1960      | —         |
| Total                       | 0.12 | 1960      | —         |

4.5.2 By Mineral

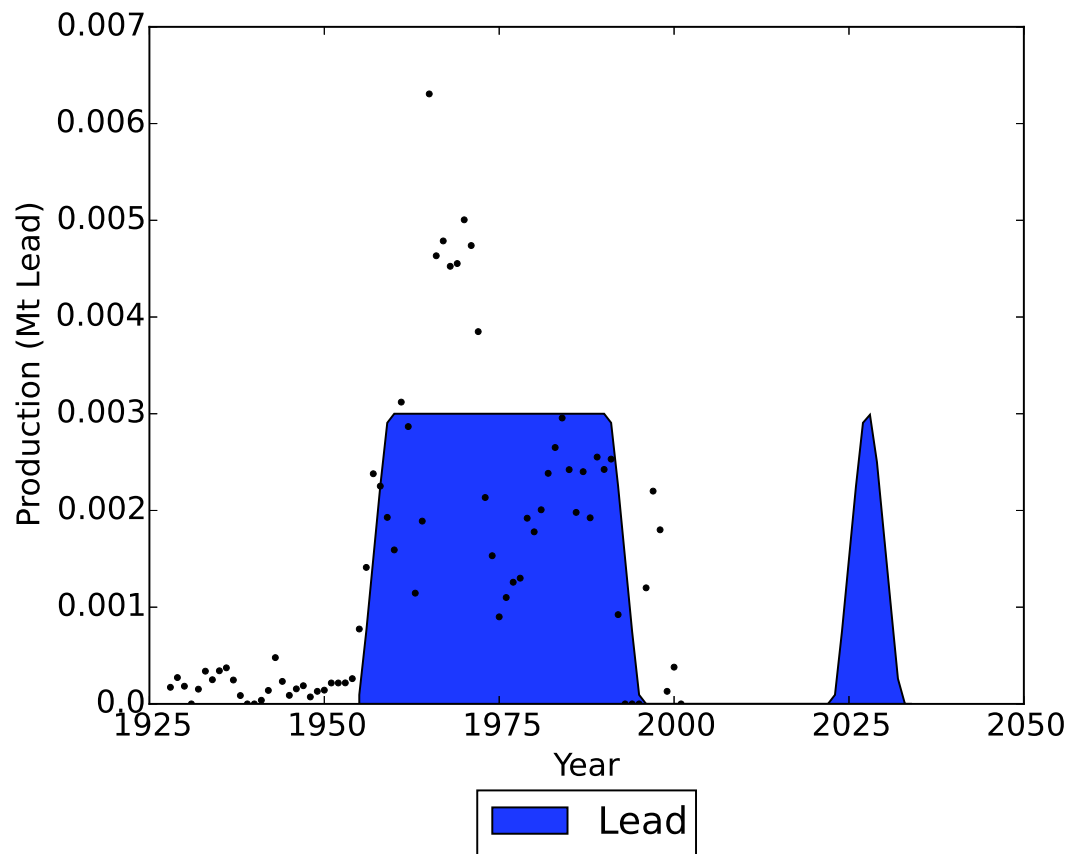

Figure 4.10: Finland projection by mineral type

| Table 4.10: Peak years - Minerals |             |             |           |
|-----------------------------------|-------------|-------------|-----------|
| Name                              | URR         | Peak Year   | Peak Rate |
| Lead                              | 0.12        | 1960        | —         |
| <b>Total</b>                      | <b>0.12</b> | <b>1960</b> | —         |

# 4.6 France

## 4.6.1 All Projections

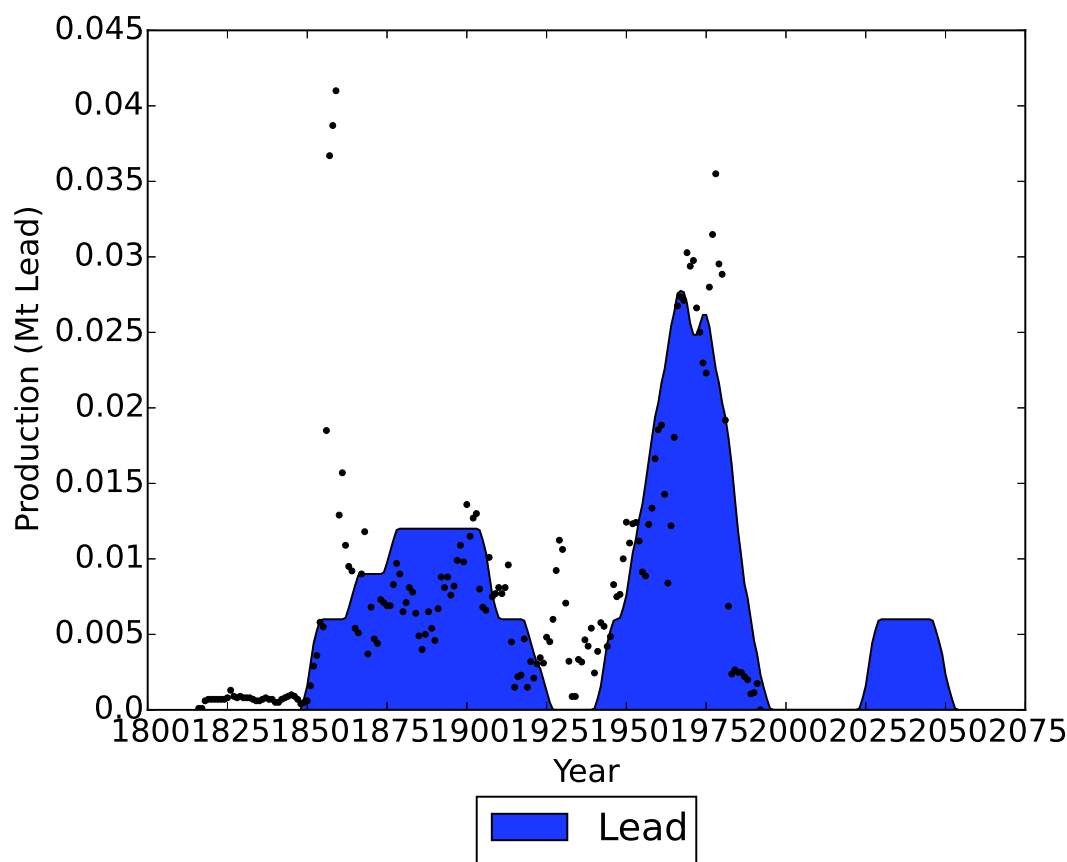

Figure 4.11: France projections capped at 16

| Table 4.11: Peak years - All |      |           |           |
|------------------------------|------|-----------|-----------|
| Name                         | URR  | Peak Year | Peak Rate |
| Lead                         | 1.61 | 1967      | 0.03      |
| Total                        | 1.61 | 1967      | 0.03      |

4.6.2 By Mineral

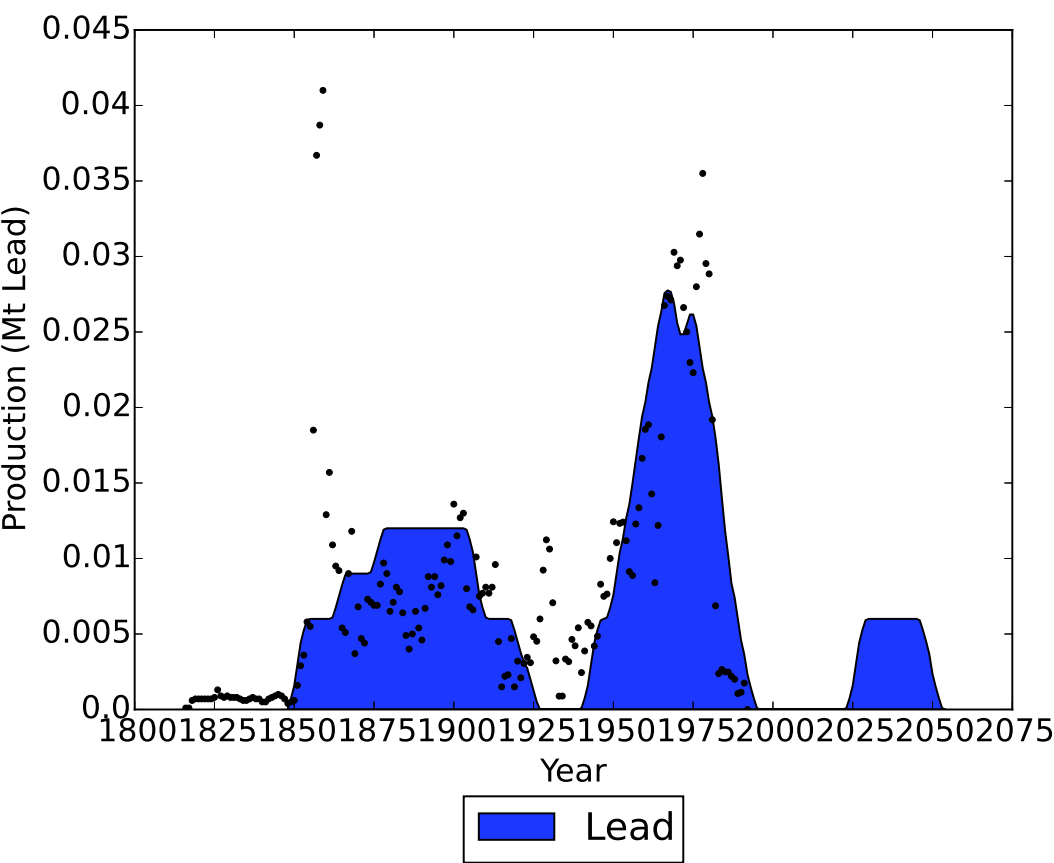

Figure 4.12: France projection by mineral type

Table 4.12: Peak years - Minerals

| Name         | URR         | Peak Year   | Peak Rate   |
|--------------|-------------|-------------|-------------|
| Lead         | 1.61        | 1967        | 0.03        |
| <b>Total</b> | <b>1.61</b> | <b>1967</b> | <b>0.03</b> |

4.7 Germany

4.7.1 All Projections

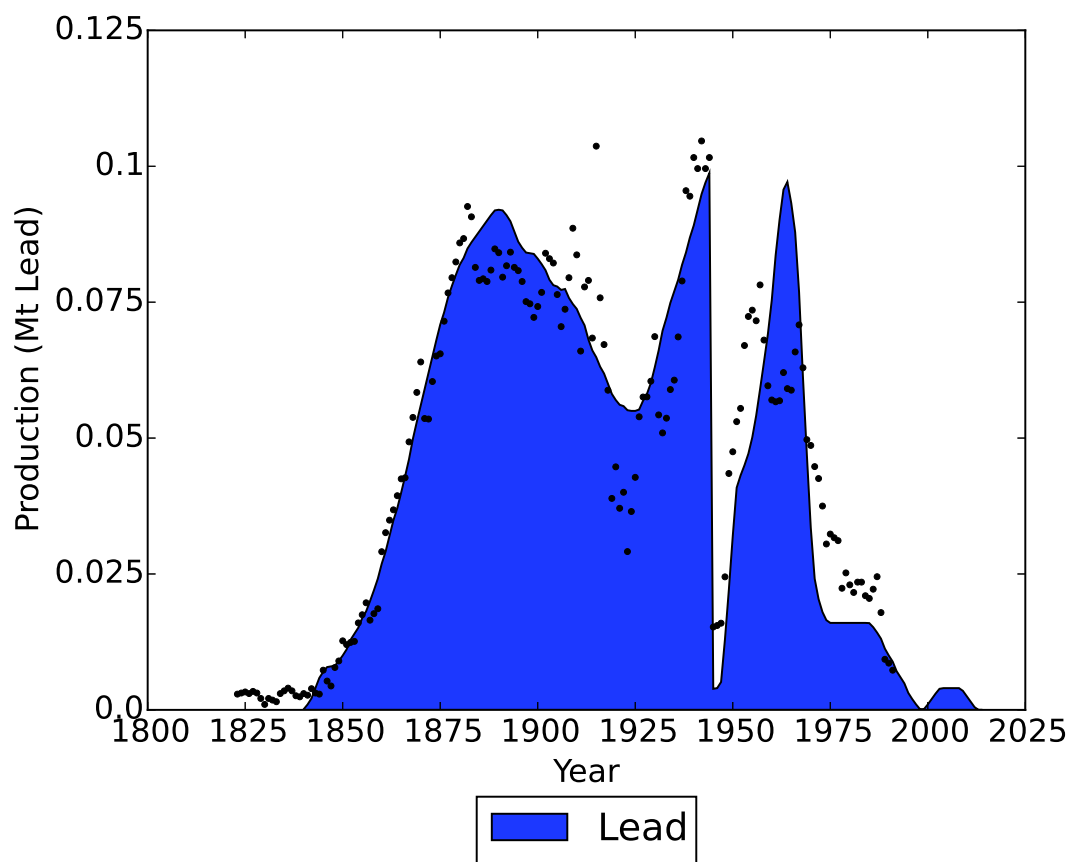

Figure 4.13: Germany projections capped at 16

| Table 4.13: Peak years - All |      |           |           |
|------------------------------|------|-----------|-----------|
| Name                         | URR  | Peak Year | Peak Rate |
| Lead                         | 8.07 | 1944      | 0.1       |
| Total                        | 8.07 | 1944      | 0.1       |

4.7.2 By Mineral

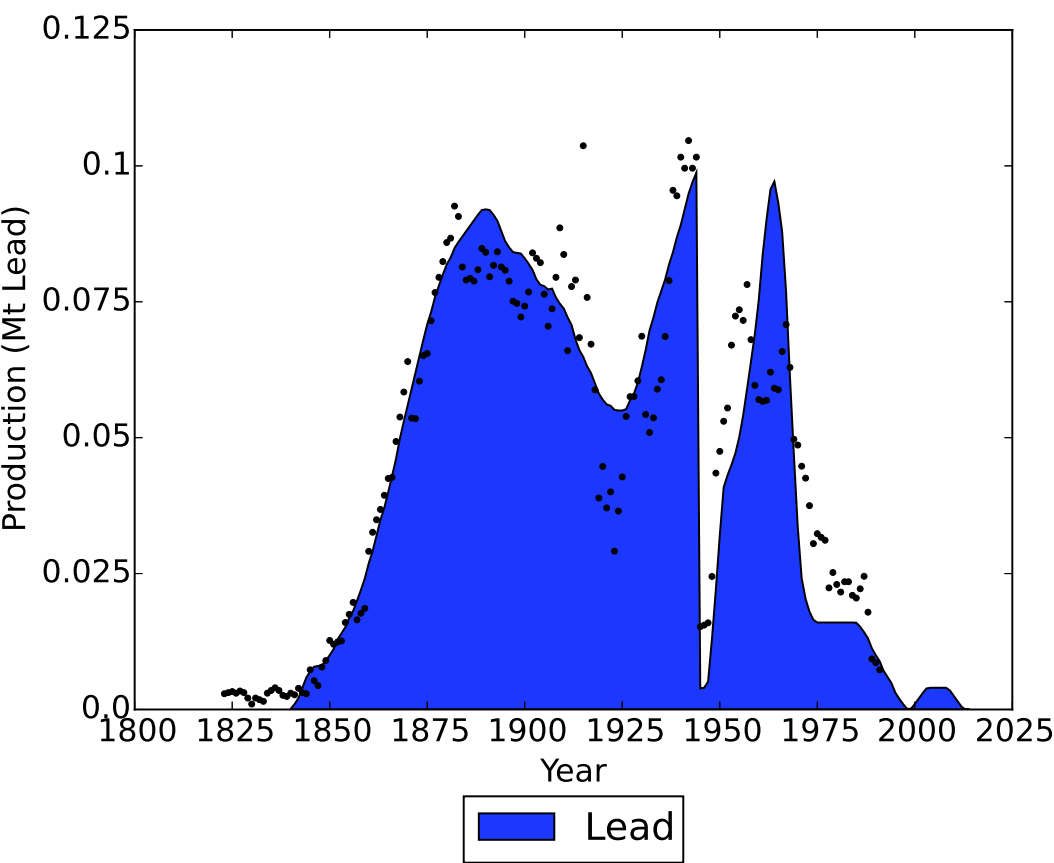

Figure 4.14: Germany projection by mineral type

| Table 4.14: Peak years - Minerals |             |             |            |
|-----------------------------------|-------------|-------------|------------|
| Name                              | URR         | Peak Year   | Peak Rate  |
| Lead                              | 8.07        | 1944        | 0.1        |
| <b>Total</b>                      | <b>8.07</b> | <b>1944</b> | <b>0.1</b> |

4.8 Greece

4.8.1 All Projections

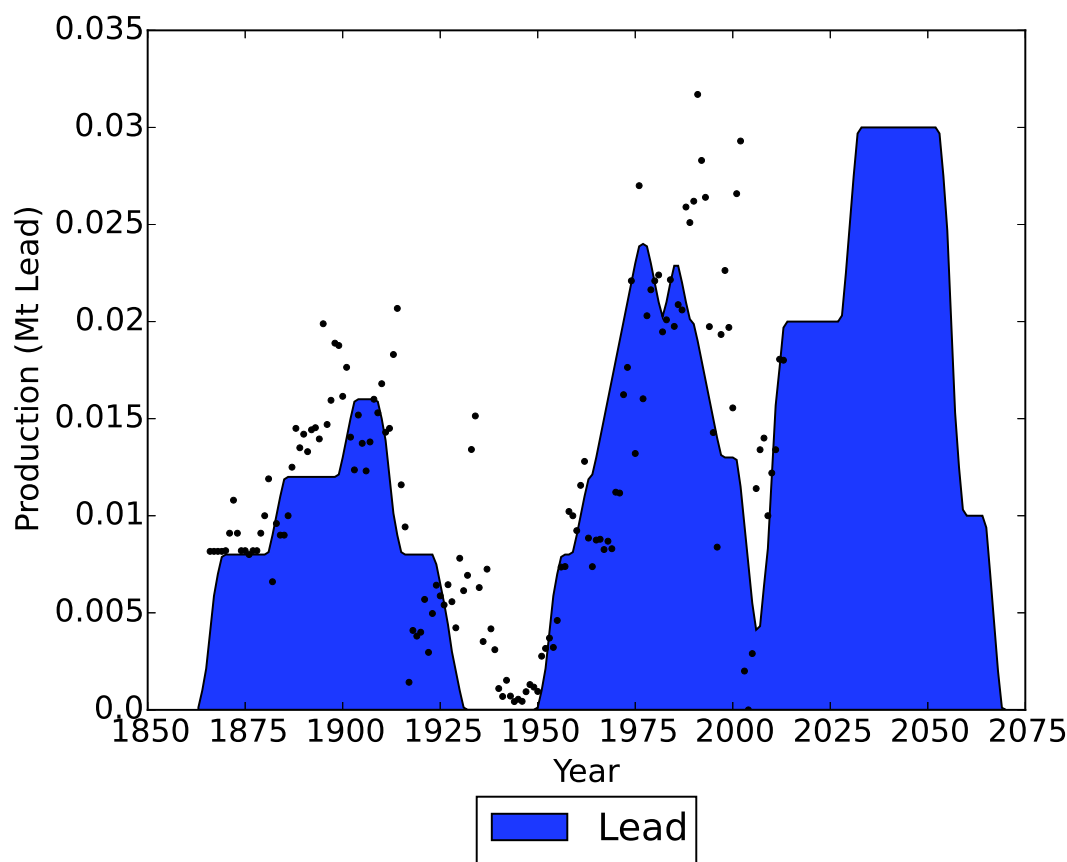

Figure 4.15: Greece projections capped at 16

| Table 4.15: Peak years - All |      |           |           |
|------------------------------|------|-----------|-----------|
| Name                         | URR  | Peak Year | Peak Rate |
| Lead                         | 2.79 | 2048      | 0.03      |
| Total                        | 2.79 | 2048      | 0.03      |



4.8.2 By Mineral

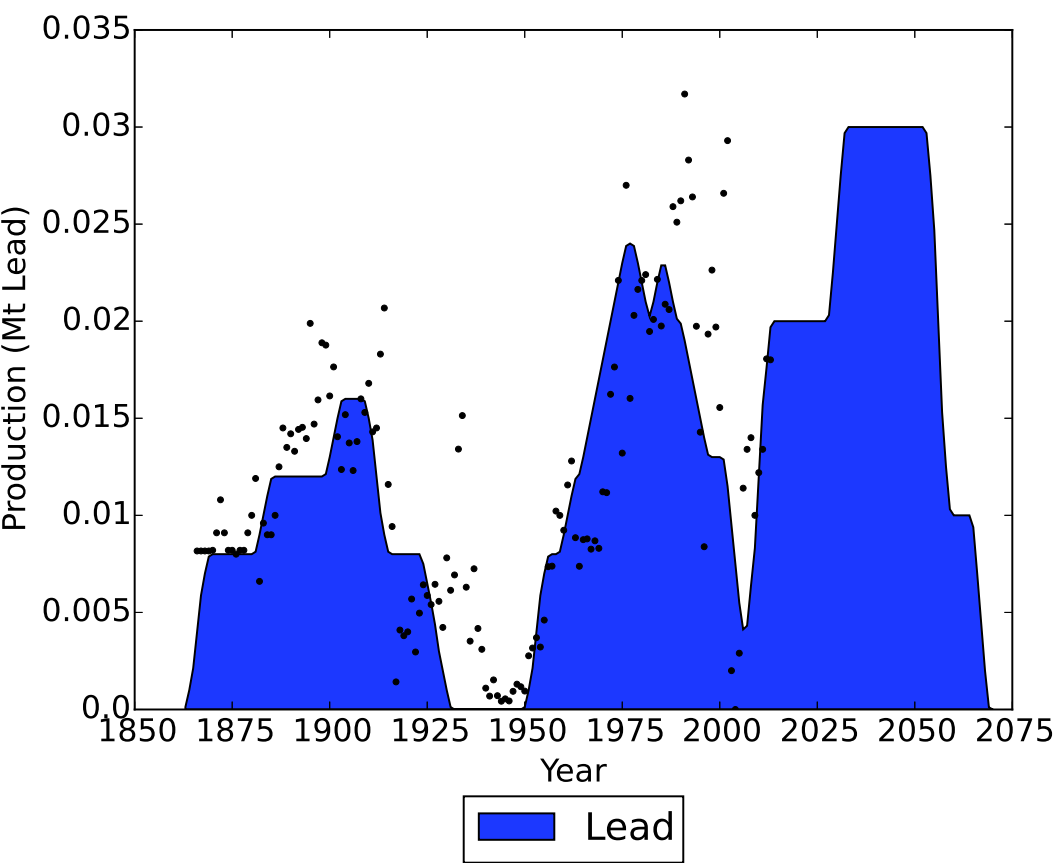

Figure 4.16: Greece projection by mineral type

| Table 4.16: Peak years - Minerals |             |             |             |
|-----------------------------------|-------------|-------------|-------------|
| Name                              | URR         | Peak Year   | Peak Rate   |
| Lead                              | 2.79        | 2048        | 0.03        |
| <b>Total</b>                      | <b>2.79</b> | <b>2048</b> | <b>0.03</b> |

4.9 Greenland

4.9.1 All Projections

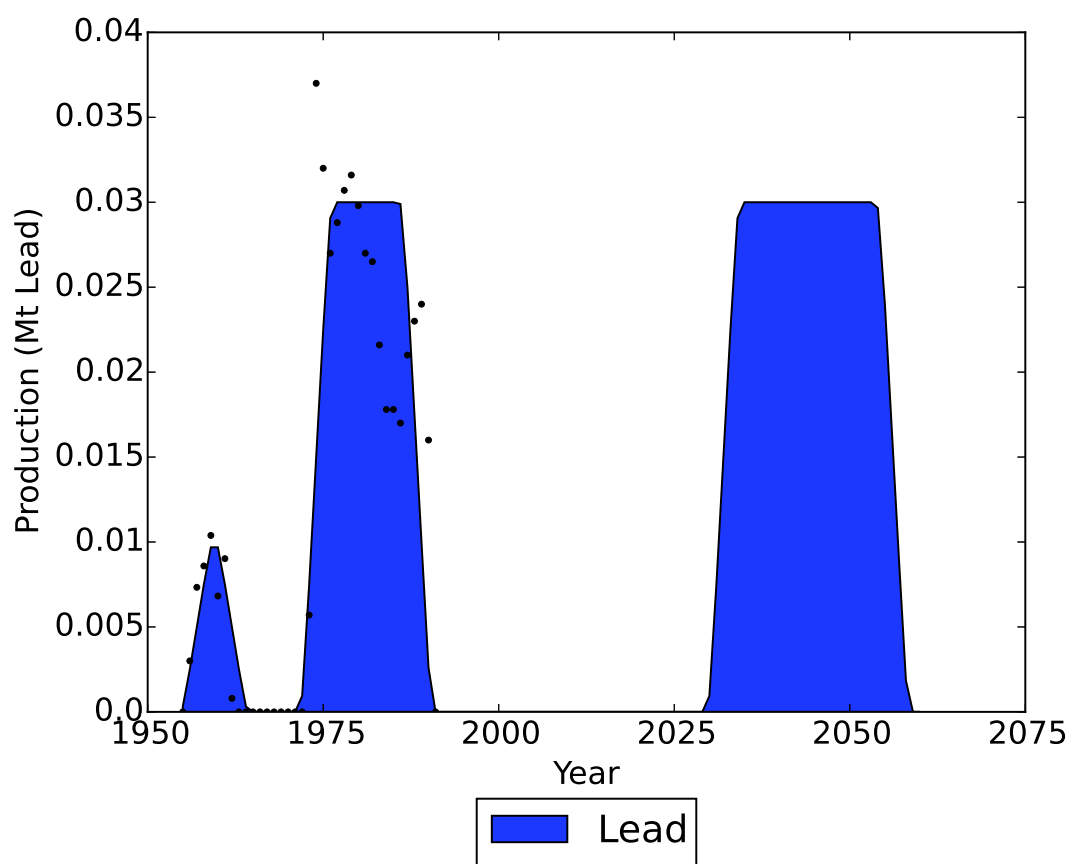

Figure 4.17: Greenland projections capped at 16

Table 4.17: Peak years - All

| Name  | URR  | Peak Year | Peak Rate |
|-------|------|-----------|-----------|
| Lead  | 1.21 | 2048      | 0.03      |
| Total | 1.21 | 2048      | 0.03      |

4.9.2 By Mineral

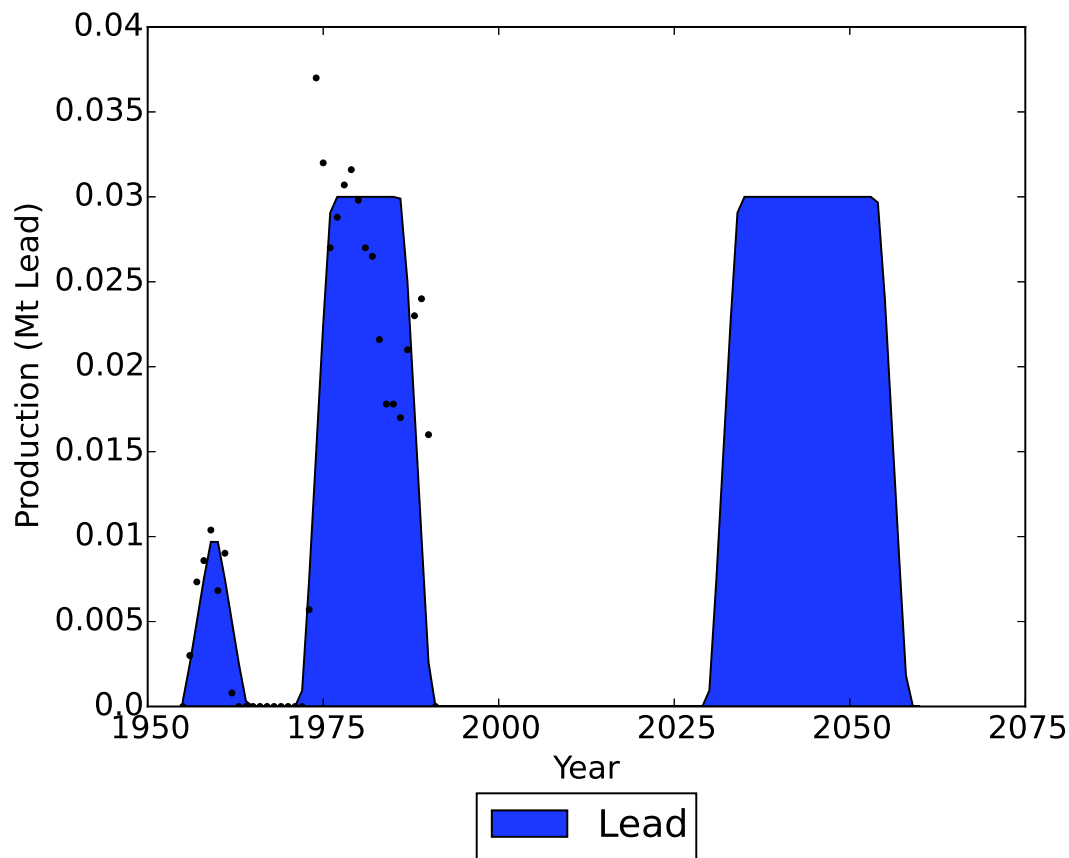

Figure 4.18: Greenland projection by mineral type

| Table 4.18: Peak years - Minerals |      |           |           |
|-----------------------------------|------|-----------|-----------|
| Name                              | URR  | Peak Year | Peak Rate |
| Lead                              | 1.21 | 2048      | 0.03      |
| Total                             | 1.21 | 2048      | 0.03      |

4.10 Hungary

4.10.1 All Projections

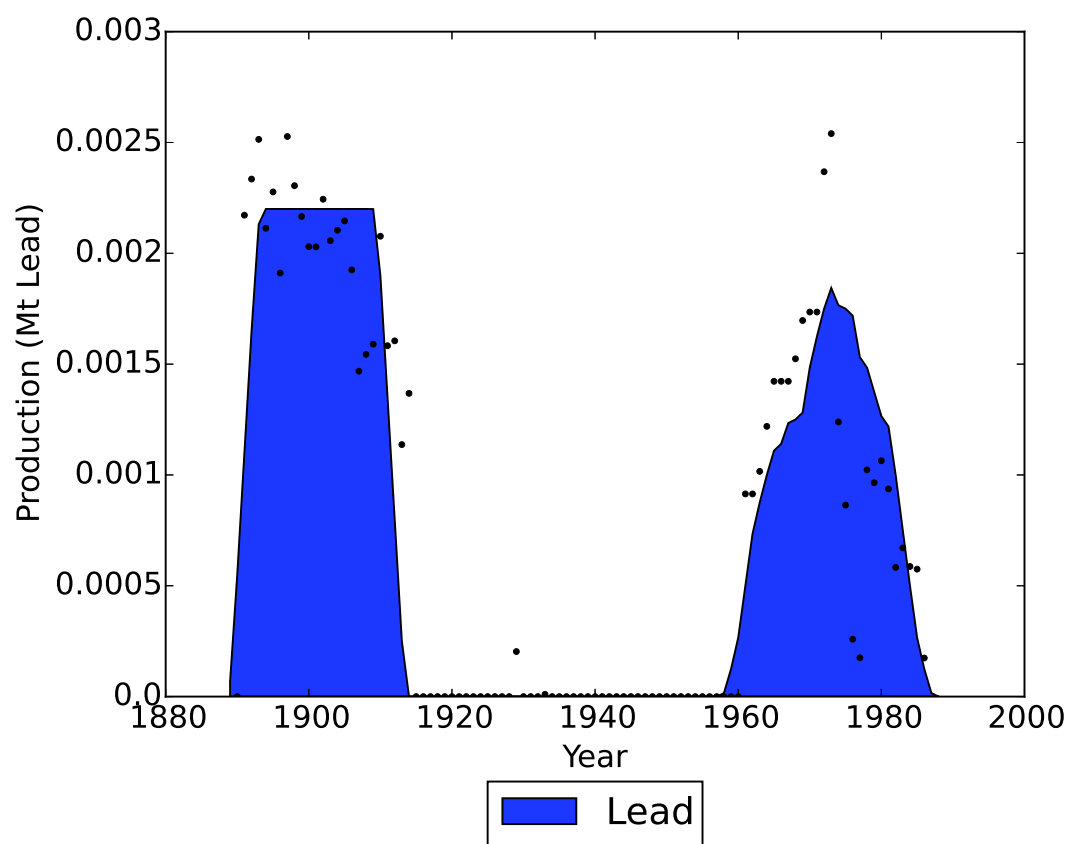

Figure 4.19: Hungary projections capped at 16

| Table 4.19: Peak years - All |      |           |           |
|------------------------------|------|-----------|-----------|
| Name                         | URR  | Peak Year | Peak Rate |
| Lead                         | 0.08 | 1894      | —         |
| Total                        | 0.08 | 1894      | —         |

4.10.2 By Mineral

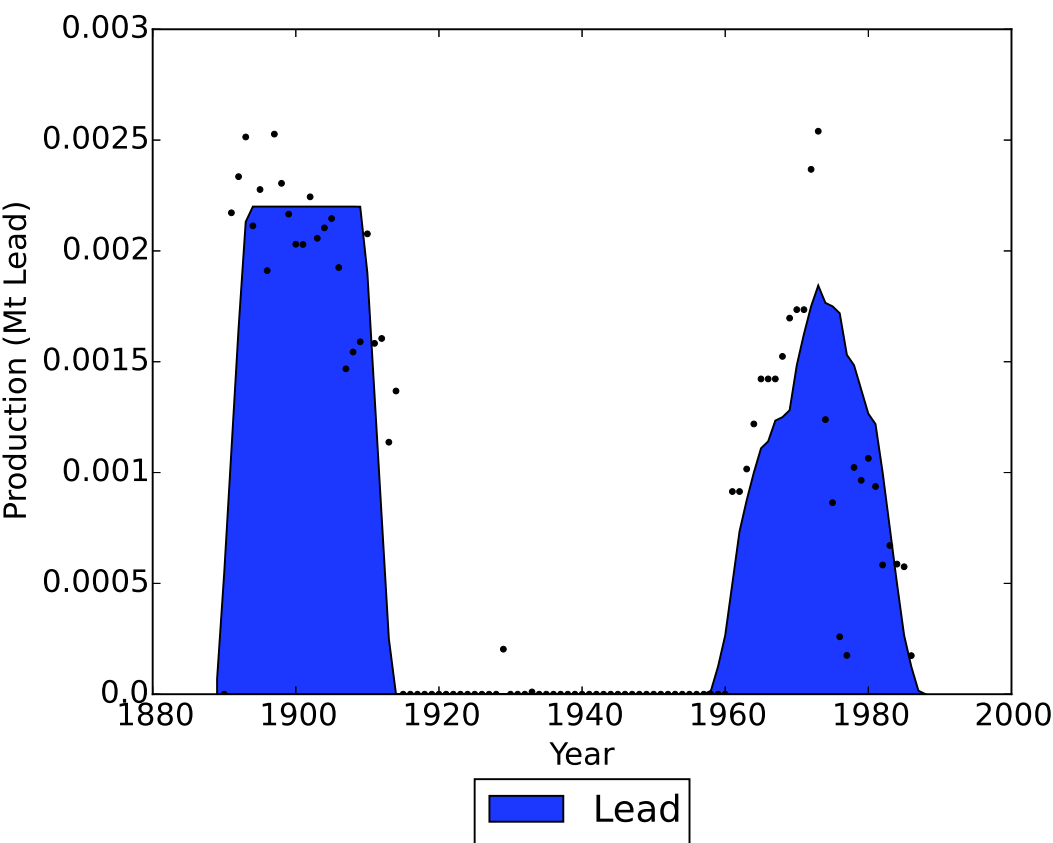

Figure 4.20: Hungary projection by mineral type

| Table 4.20: Peak years - Minerals |             |             |           |
|-----------------------------------|-------------|-------------|-----------|
| Name                              | URR         | Peak Year   | Peak Rate |
| Lead                              | 0.08        | 1894        | —         |
| <b>Total</b>                      | <b>0.08</b> | <b>1894</b> | —         |

# 4.11 Ireland

## 4.11.1 All Projections

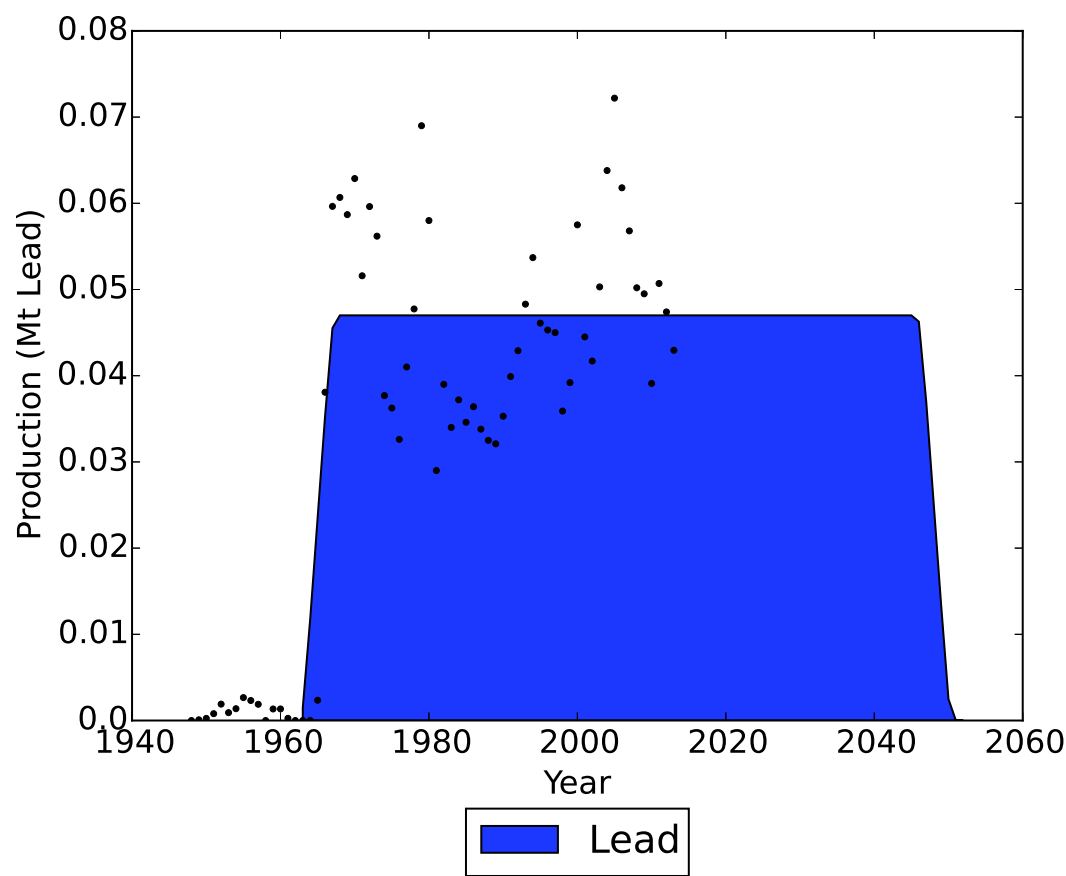

Figure 4.21: Ireland projections capped at 16

| Table 4.21: Peak years - All |      |           |           |
|------------------------------|------|-----------|-----------|
| Name                         | URR  | Peak Year | Peak Rate |
| Lead                         | 3.91 | 1968      | 0.05      |
| Total                        | 3.91 | 1968      | 0.05      |

4.11.2 By Mineral

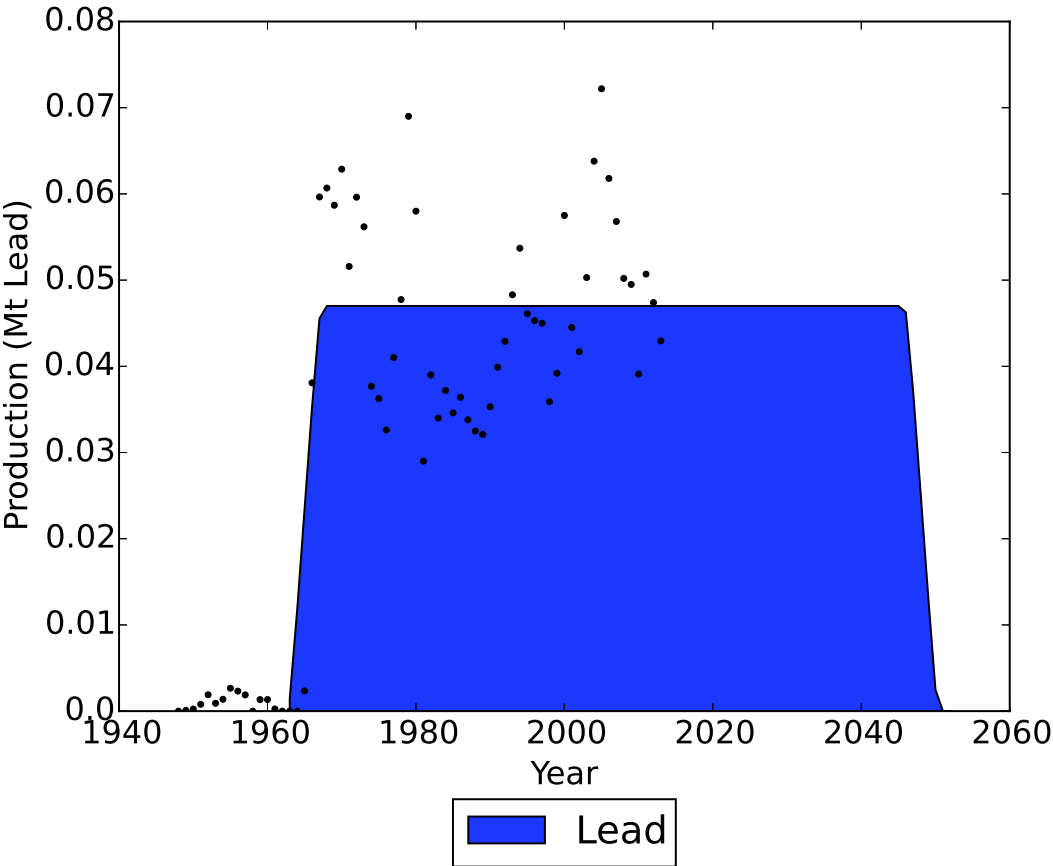

Figure 4.22: Ireland projection by mineral type

Table 4.22: Peak years - Minerals

| Name  | URR  | Peak Year | Peak Rate |
|-------|------|-----------|-----------|
| Lead  | 3.91 | 1968      | 0.05      |
| Total | 3.91 | 1968      | 0.05      |

4.12 Italy

4.12.1 All Projections

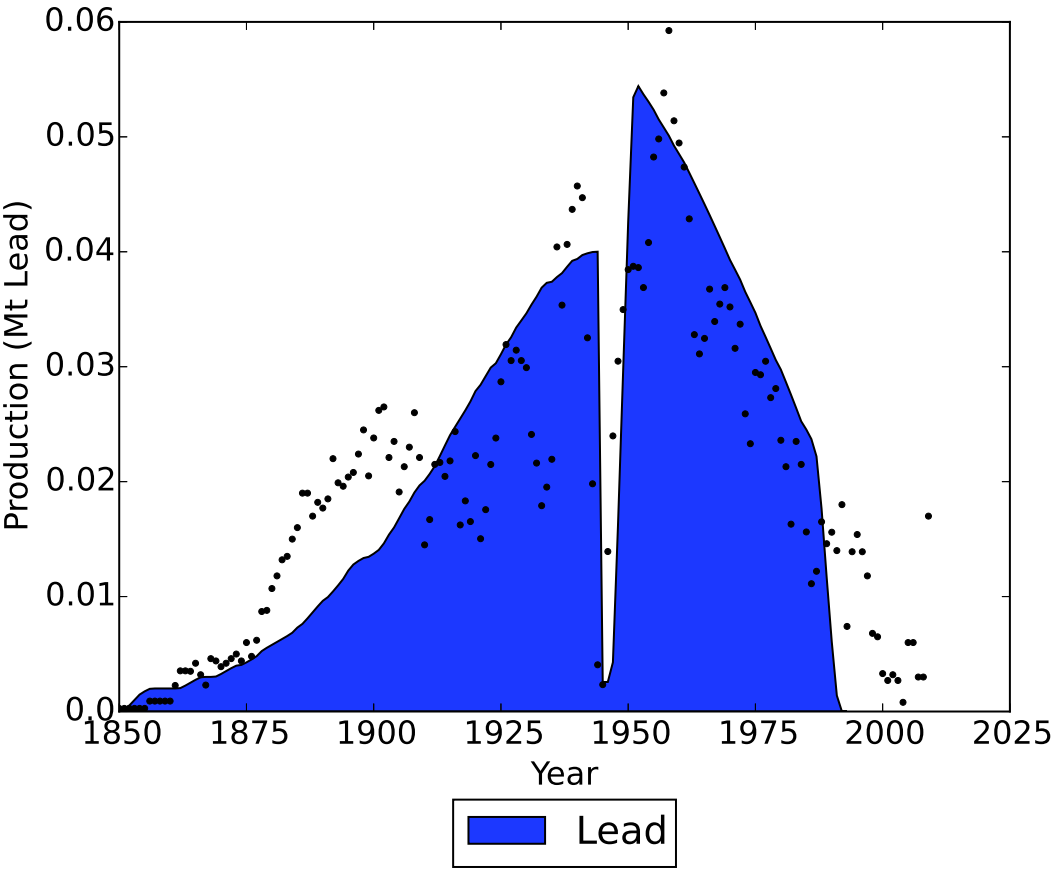

Figure 4.23: Italy projections capped at 16

| Table 4.23: Peak years - All |      |           |           |
|------------------------------|------|-----------|-----------|
| Name                         | URR  | Peak Year | Peak Rate |
| Lead                         | 3.16 | 1952      | 0.05      |
| Total                        | 3.16 | 1952      | 0.05      |



4.12.2 By Mineral

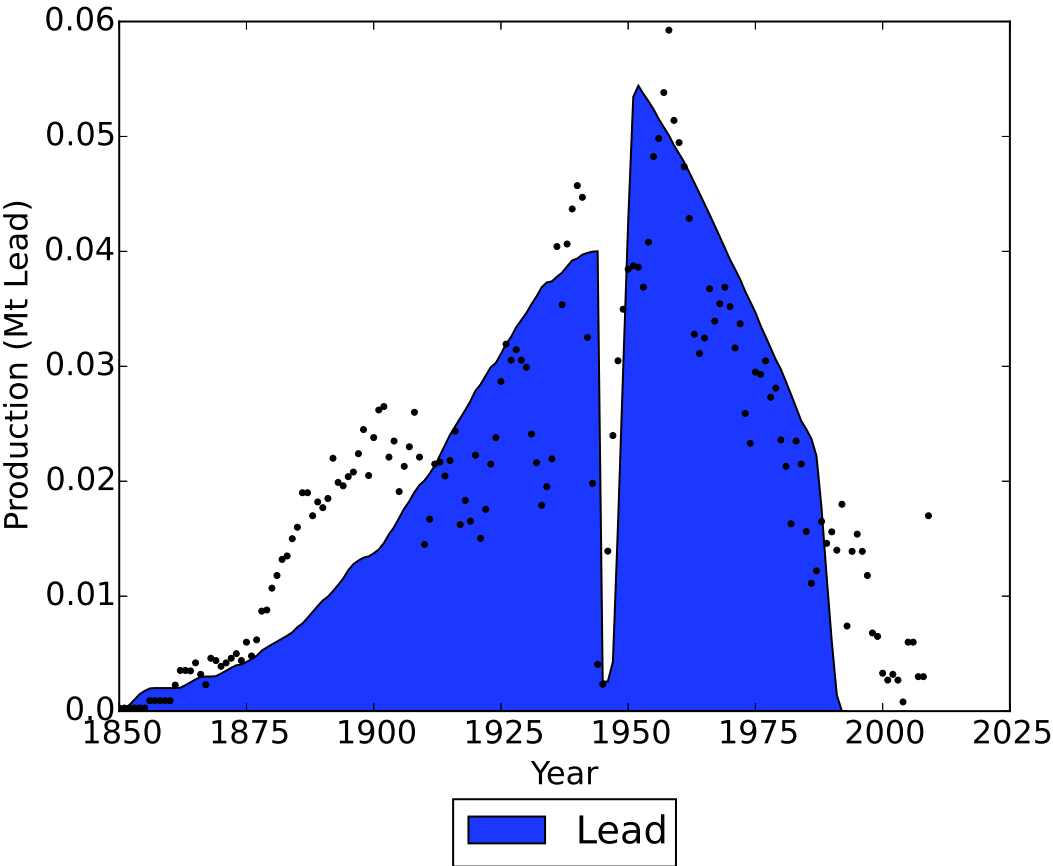

Figure 4.24: Italy projection by mineral type

| Table 4.24: Peak years - Minerals |      |           |           |
|-----------------------------------|------|-----------|-----------|
| Name                              | URR  | Peak Year | Peak Rate |
| Lead                              | 3.16 | 1952      | 0.05      |
| Total                             | 3.16 | 1952      | 0.05      |

4.13 Kosovo

4.13.1 All Projections

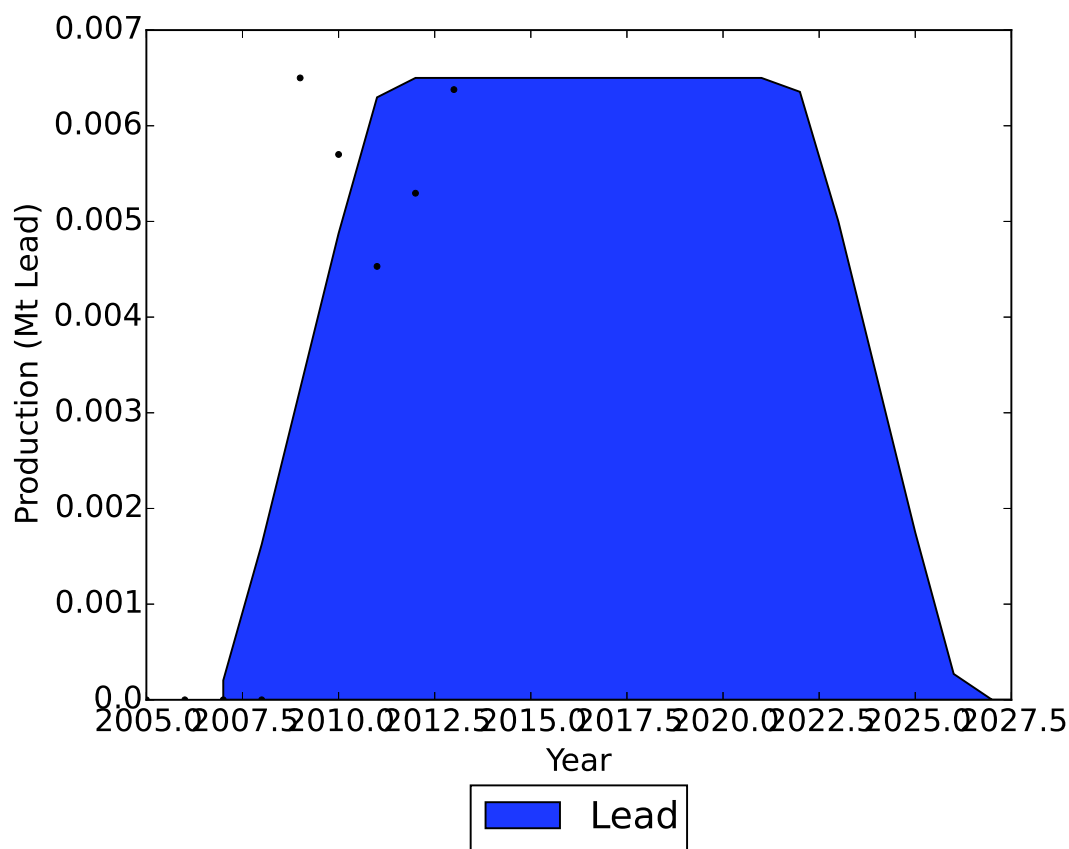

Figure 4.25: Kosovo projections capped at 16

Table 4.25: Peak years - All

| Name  | URR | Peak Year | Peak Rate |
|-------|-----|-----------|-----------|
| Lead  | 0.1 | 2012      | 0.01      |
| Total | 0.1 | 2012      | 0.01      |

4.13.2 By Mineral

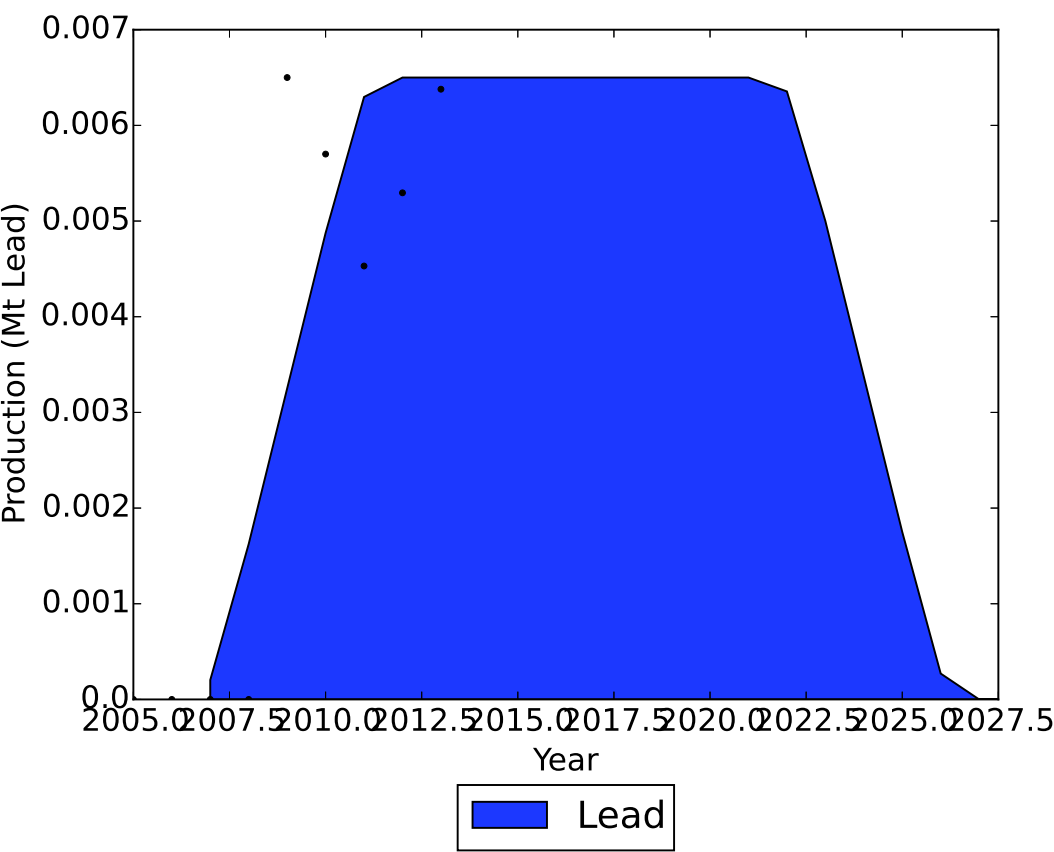

Figure 4.26: Kosovo projection by mineral type

Table 4.26: Peak years - Minerals

| Name  | URR | Peak Year | Peak Rate |
|-------|-----|-----------|-----------|
| Lead  | 0.1 | 2012      | 0.01      |
| Total | 0.1 | 2012      | 0.01      |

4.14 Macedonia

4.14.1 All Projections

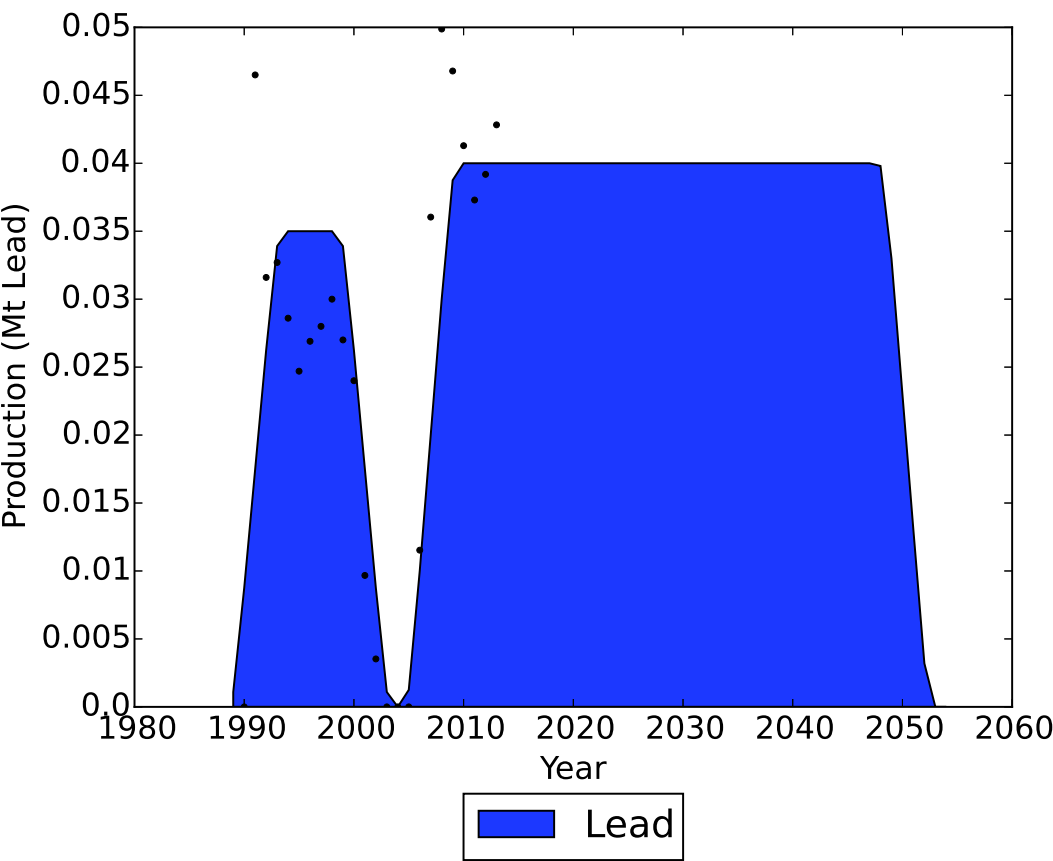

Figure 4.27: Macedonia projections capped at 16

| Table 4.27: Peak years - All |      |           |           |
|------------------------------|------|-----------|-----------|
| Name                         | URR  | Peak Year | Peak Rate |
| Lead                         | 2.08 | 2010      | 0.04      |
| Total                        | 2.08 | 2010      | 0.04      |

4.14.2 By Mineral

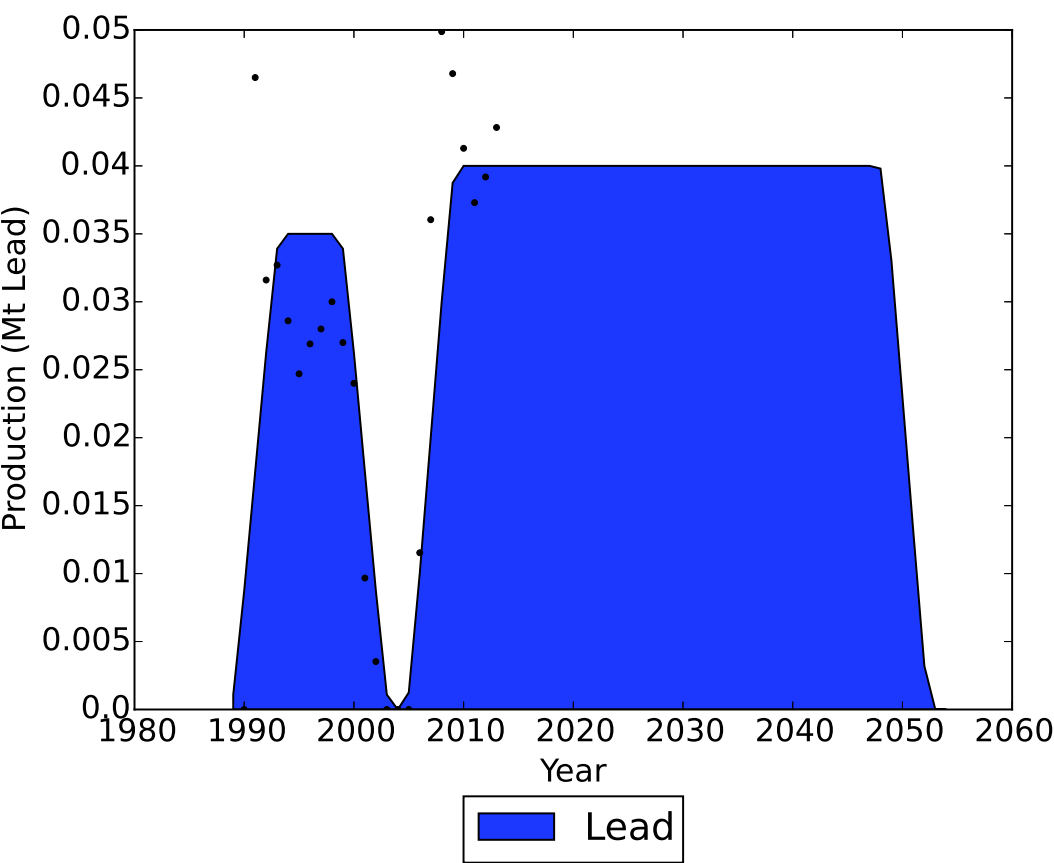

Figure 4.28: Macedonia projection by mineral type

| Table 4.28: Peak years - Minerals |      |           |           |
|-----------------------------------|------|-----------|-----------|
| Name                              | URR  | Peak Year | Peak Rate |
| Lead                              | 2.08 | 2010      | 0.04      |
| Total                             | 2.08 | 2010      | 0.04      |

4.15 Montenegro

4.15.1 All Projections

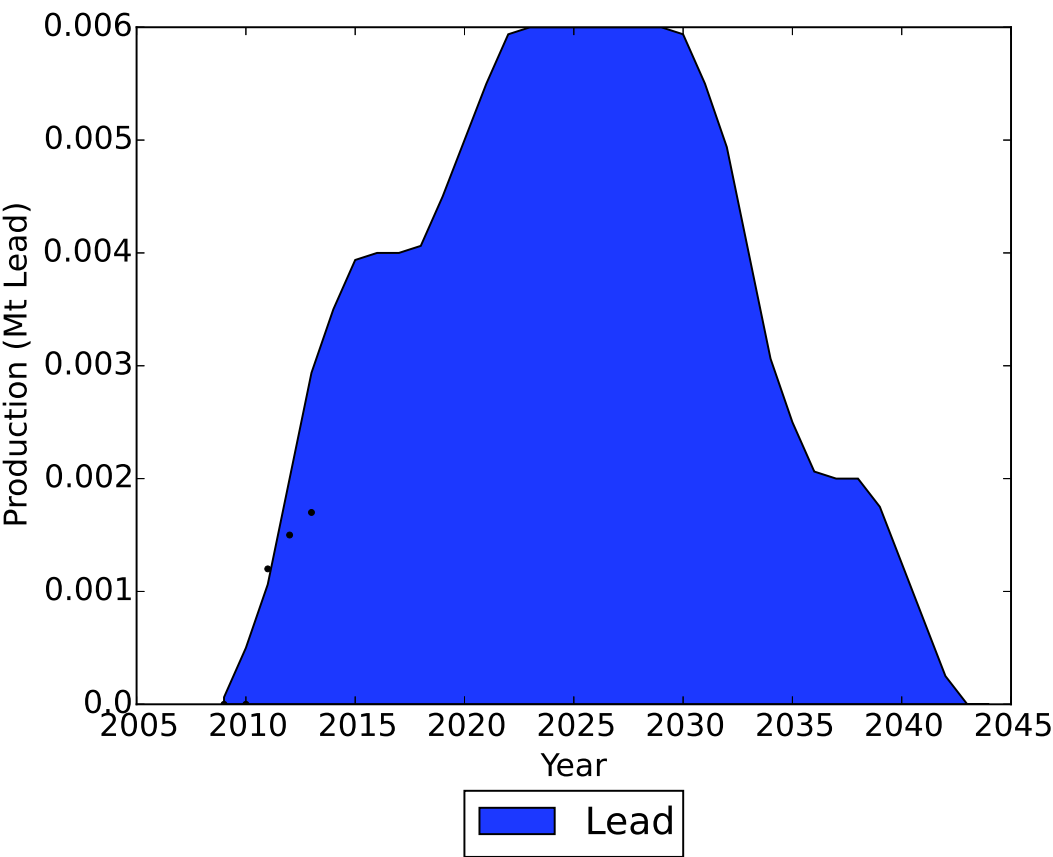

Figure 4.29: Montenegro projections capped at 16

| Table 4.29: Peak years - All |      |           |           |
|------------------------------|------|-----------|-----------|
| Name                         | URR  | Peak Year | Peak Rate |
| Lead                         | 0.13 | 2023      | 0.01      |
| Total                        | 0.13 | 2023      | 0.01      |

4.15.2 By Mineral

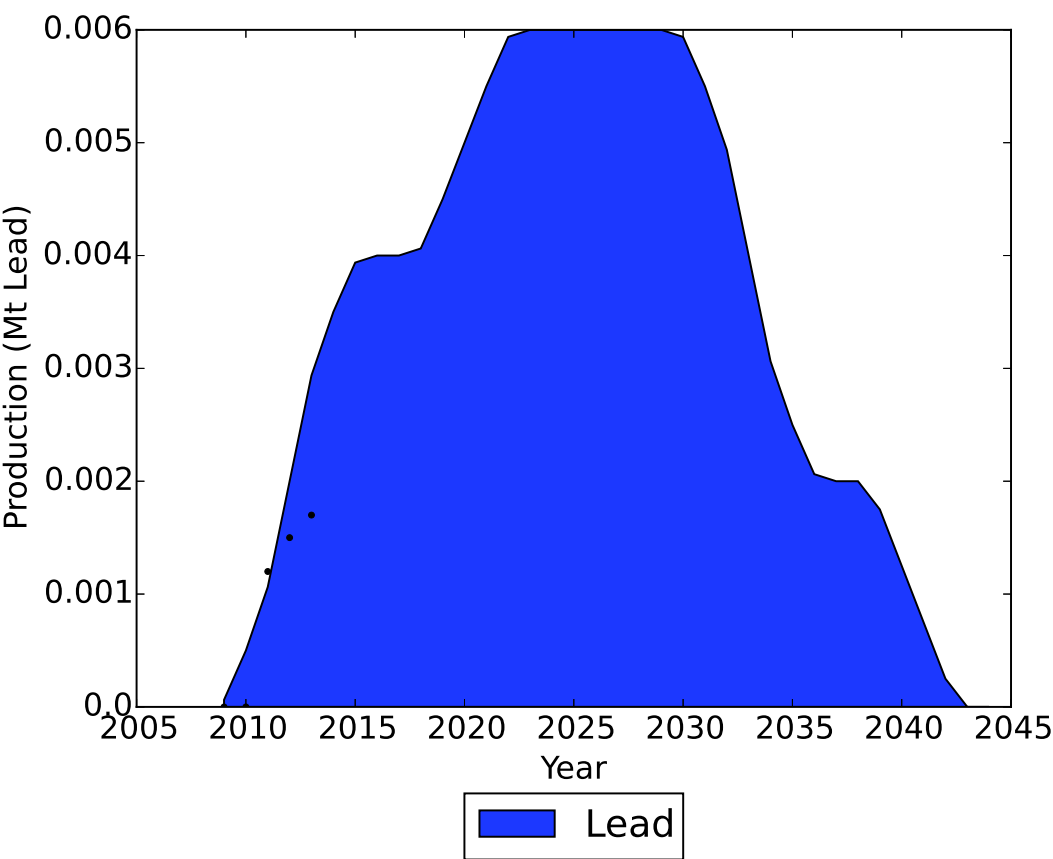

Figure 4.30: Montenegro projection by mineral type

| Table 4.30: Peak years - Minerals |      |           |           |
|-----------------------------------|------|-----------|-----------|
| Name                              | URR  | Peak Year | Peak Rate |
| Lead                              | 0.13 | 2023      | 0.01      |
| Total                             | 0.13 | 2023      | 0.01      |

4.16 Norway

4.16.1 All Projections

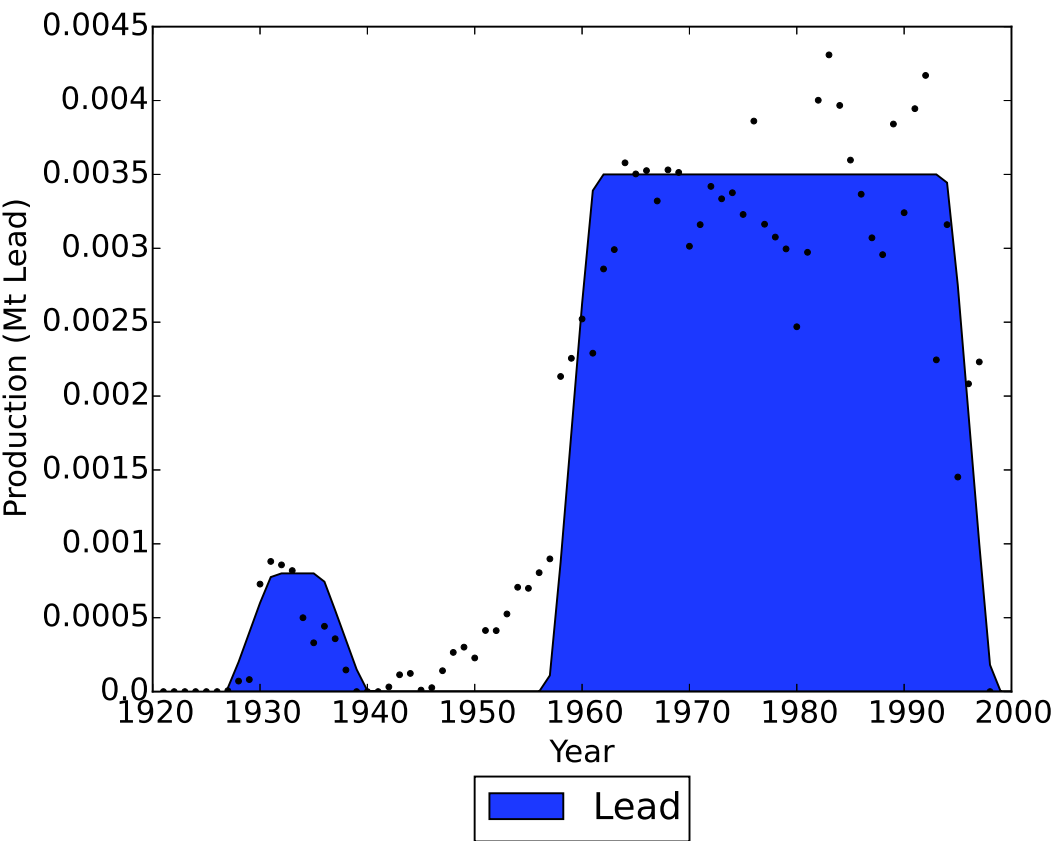

Figure 4.31: Norway projections capped at 16

| Table 4.31: Peak years - All |      |           |           |
|------------------------------|------|-----------|-----------|
| Name                         | URR  | Peak Year | Peak Rate |
| Lead                         | 0.14 | 1962      | —         |
| Total                        | 0.14 | 1962      | —         |



4.16.2 By Mineral

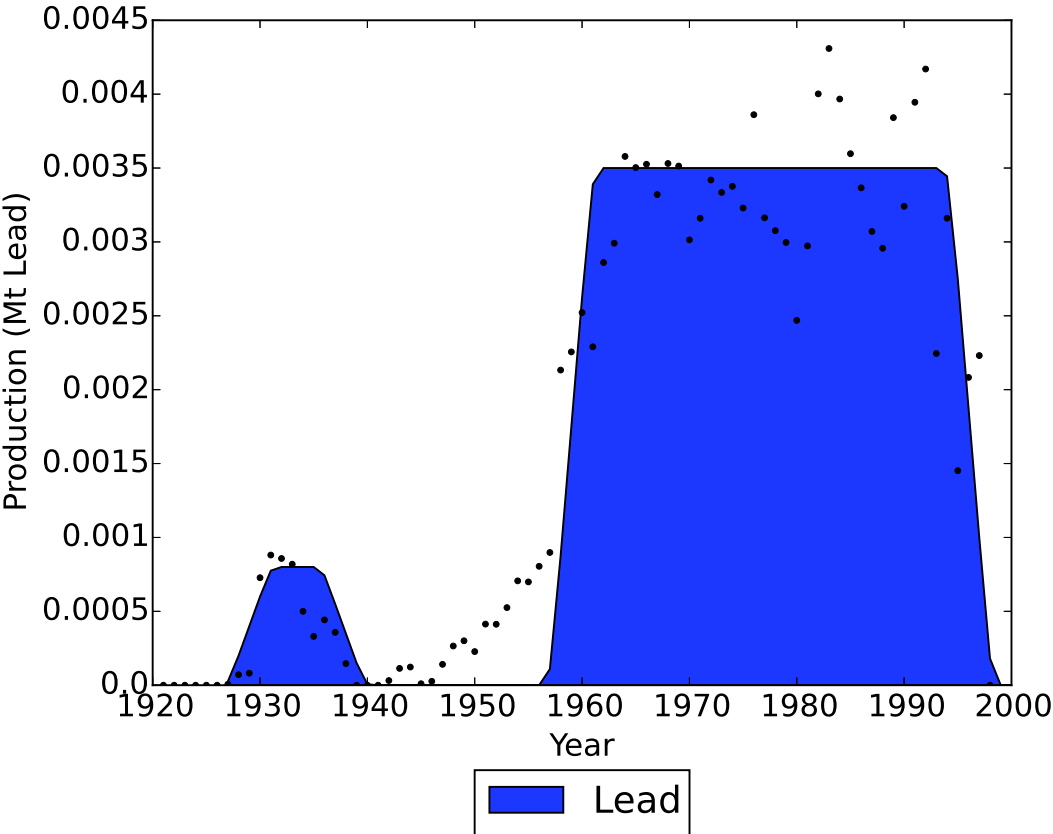

Figure 4.32: Norway projection by mineral type

| Table 4.32: Peak years - Minerals |             |             |           |
|-----------------------------------|-------------|-------------|-----------|
| Name                              | URR         | Peak Year   | Peak Rate |
| Lead                              | 0.14        | 1962        | —         |
| <b>Total</b>                      | <b>0.14</b> | <b>1962</b> | —         |

4.17 Poland

4.17.1 All Projections

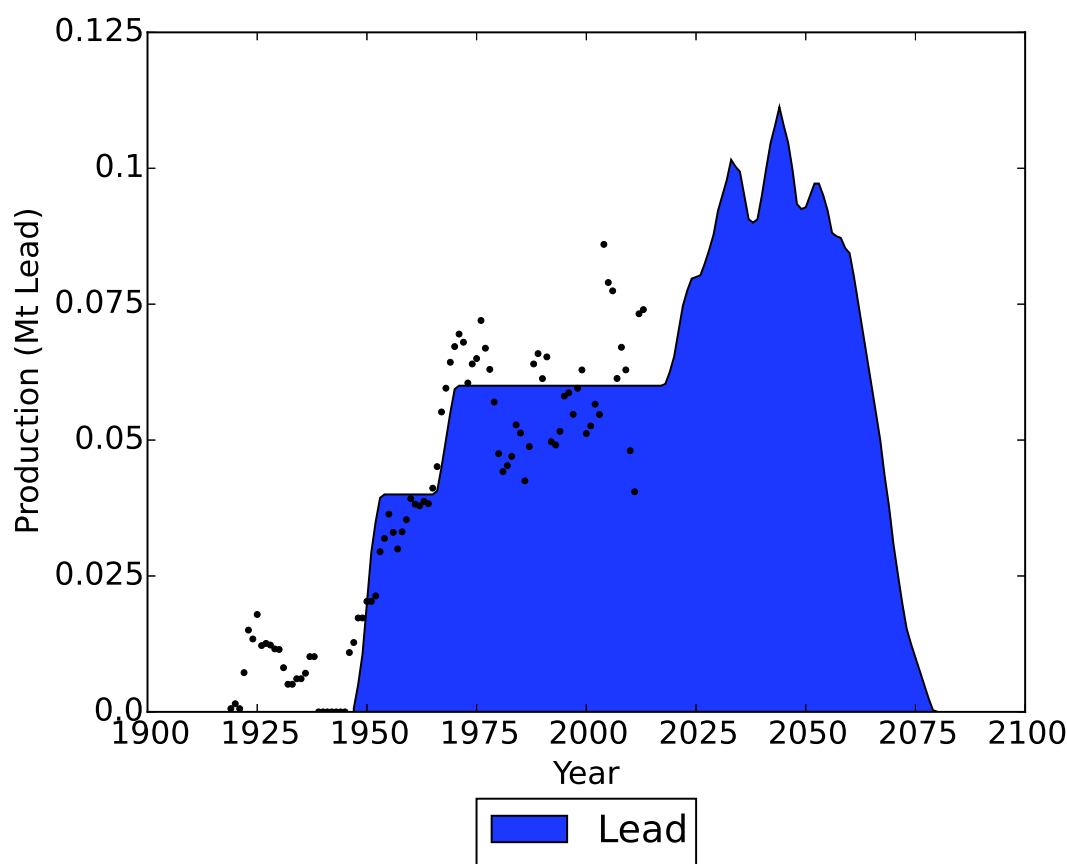

Figure 4.33: Poland projections capped at 16

| Table 4.33: Peak years - All |      |           |           |
|------------------------------|------|-----------|-----------|
| Name                         | URR  | Peak Year | Peak Rate |
| Lead                         | 8.23 | 2044      | 0.11      |
| Total                        | 8.23 | 2044      | 0.11      |

4.17.2 By Mineral

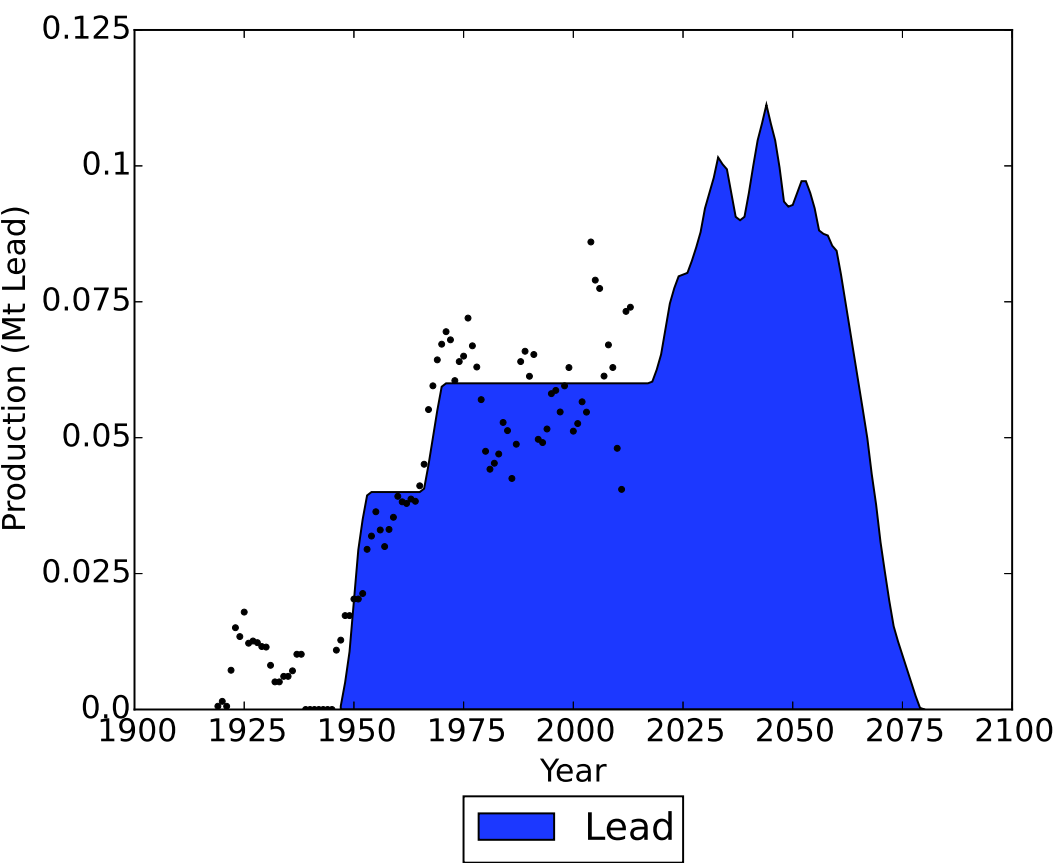

Figure 4.34: Poland projection by mineral type

| Table 4.34: Peak years - Minerals |      |           |           |
|-----------------------------------|------|-----------|-----------|
| Name                              | URR  | Peak Year | Peak Rate |
| Lead                              | 8.23 | 2044      | 0.11      |
| Total                             | 8.23 | 2044      | 0.11      |

4.18 Portugal

4.18.1 All Projections

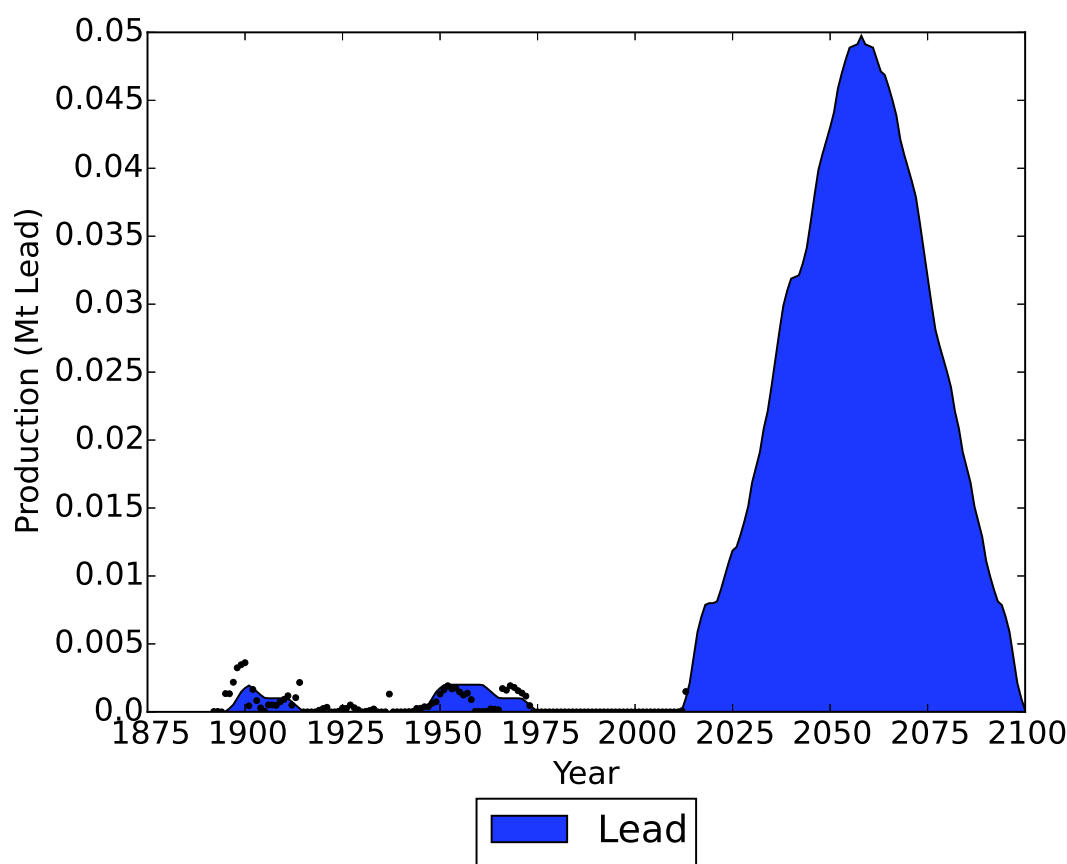

Figure 4.35: Portugal projections capped at 16

Table 4.35: Peak years - All

| Name  | URR  | Peak Year | Peak Rate |
|-------|------|-----------|-----------|
| Lead  | 2.32 | 2058      | 0.05      |
| Total | 2.32 | 2058      | 0.05      |

4.18.2 By Mineral

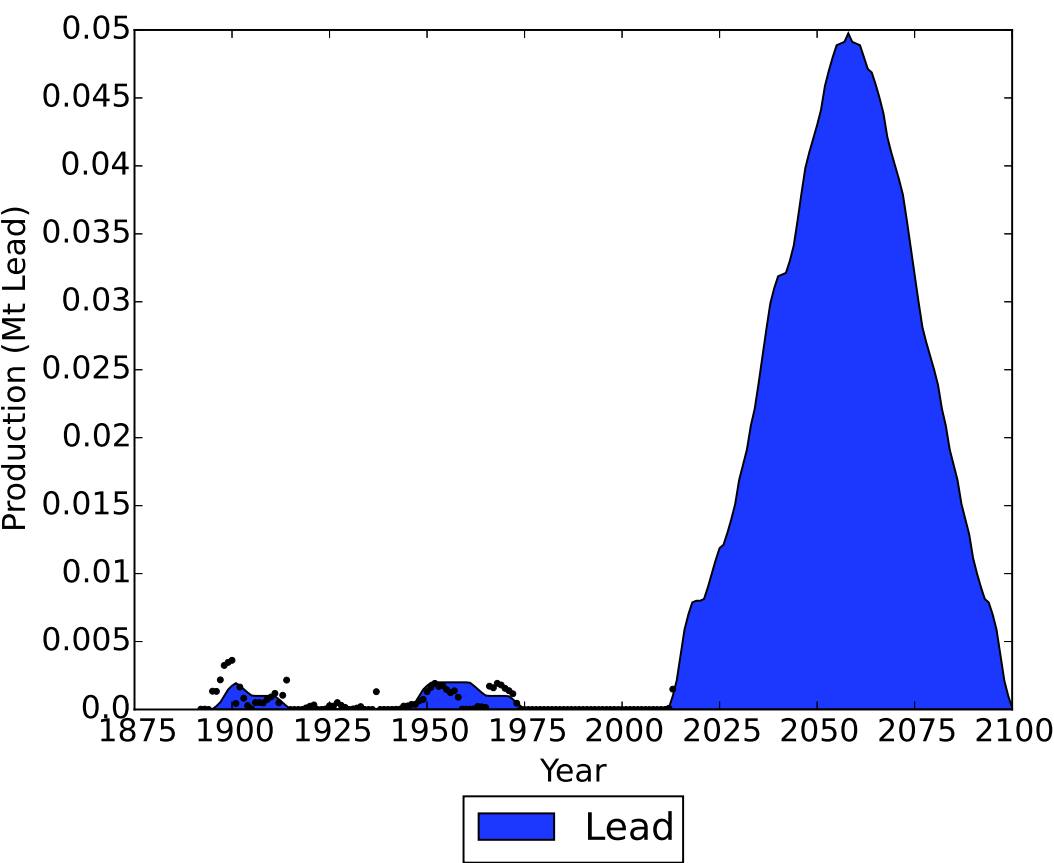

Figure 4.36: Portugal projection by mineral type

| Table 4.36: Peak years - Minerals |      |           |           |
|-----------------------------------|------|-----------|-----------|
| Name                              | URR  | Peak Year | Peak Rate |
| Lead                              | 2.32 | 2058      | 0.05      |
| Total                             | 2.32 | 2058      | 0.05      |

4.19 Romania

4.19.1 All Projections

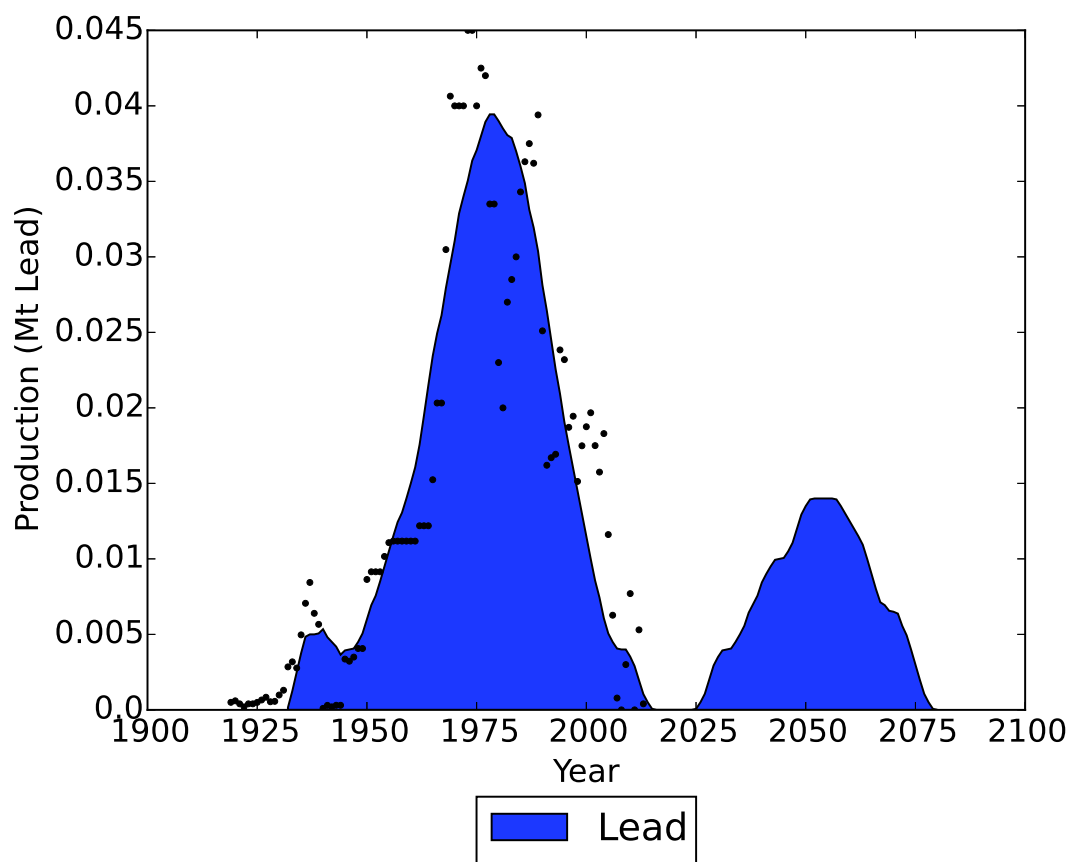

Figure 4.37: Romania projections capped at 16

| Table 4.37: Peak years - All |      |           |           |
|------------------------------|------|-----------|-----------|
| Name                         | URR  | Peak Year | Peak Rate |
| Lead                         | 1.82 | 1978      | 0.04      |
| Total                        | 1.82 | 1978      | 0.04      |

4.19.2 By Mineral

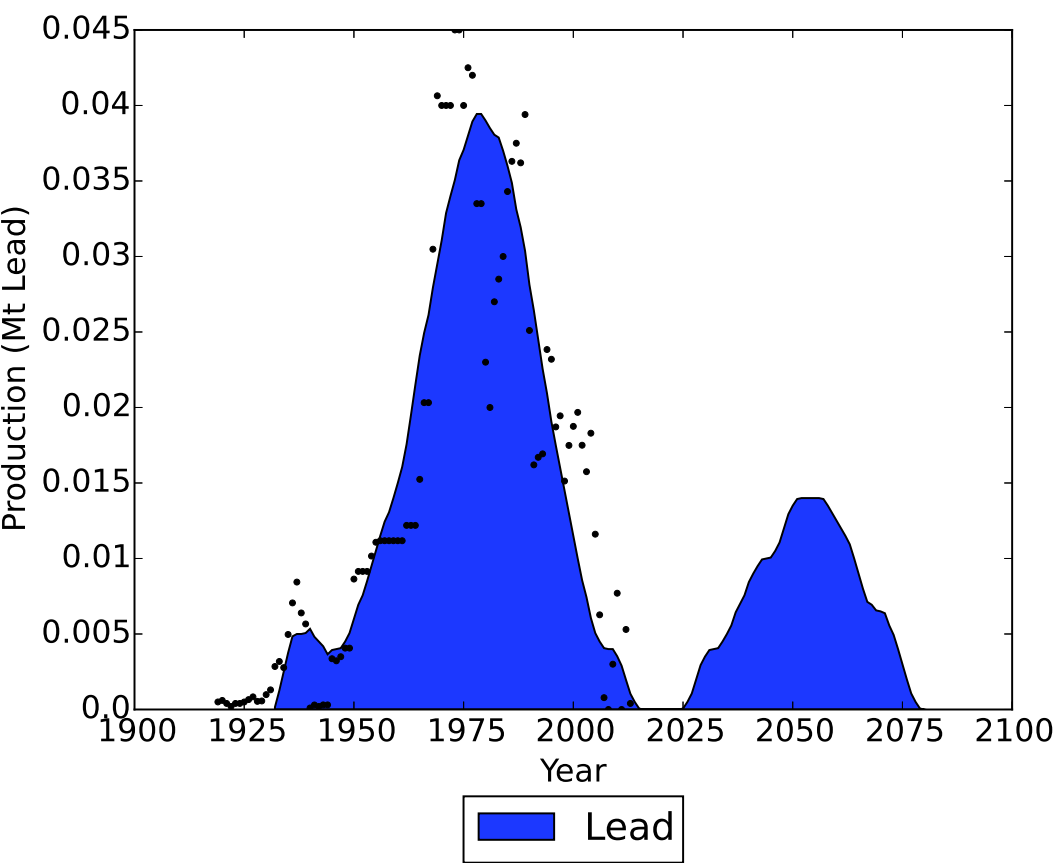

Figure 4.38: Romania projection by mineral type

| Table 4.38: Peak years - Minerals |             |             |             |
|-----------------------------------|-------------|-------------|-------------|
| Name                              | URR         | Peak Year   | Peak Rate   |
| Lead                              | 1.82        | 1978        | 0.04        |
| <b>Total</b>                      | <b>1.82</b> | <b>1978</b> | <b>0.04</b> |

4.20 Serbia

4.20.1 All Projections

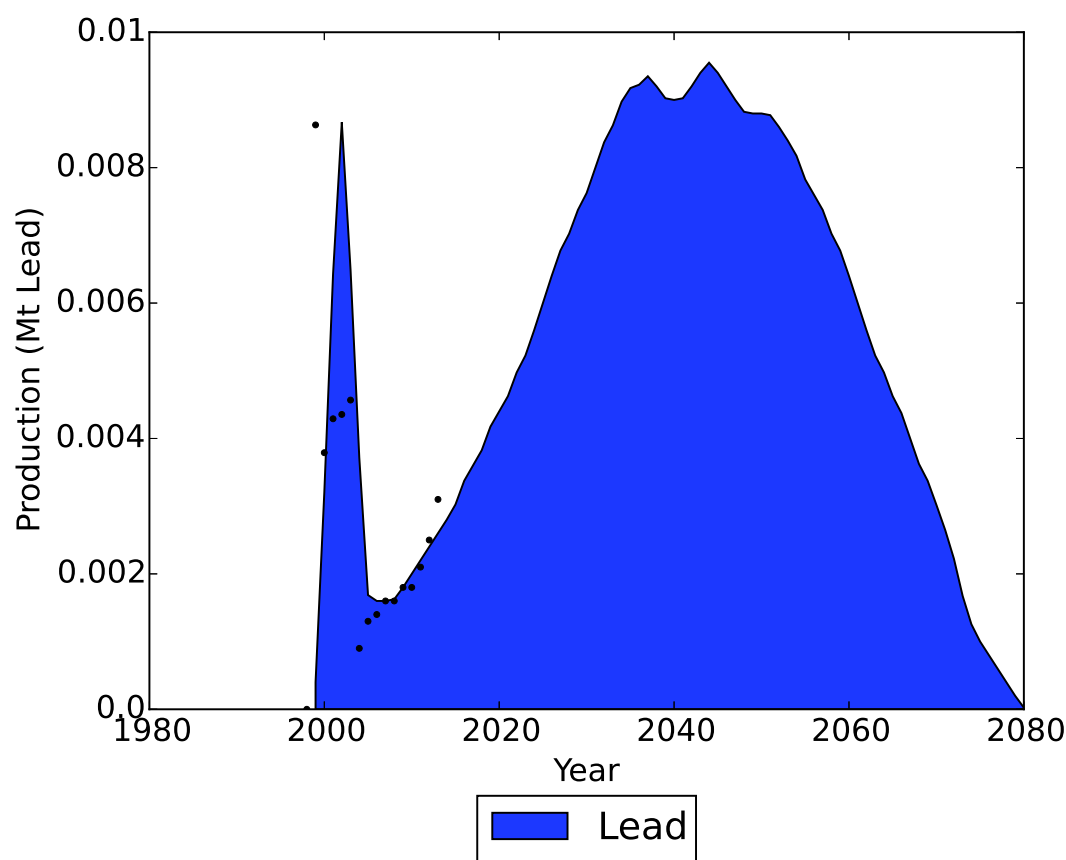

Figure 4.39: Serbia projections capped at 16

| Table 4.39: Peak years - All |             |             |             |
|------------------------------|-------------|-------------|-------------|
| Name                         | URR         | Peak Year   | Peak Rate   |
| Lead                         | 0.45        | 2044        | 0.01        |
| <b>Total</b>                 | <b>0.45</b> | <b>2044</b> | <b>0.01</b> |



4.20.2 By Mineral

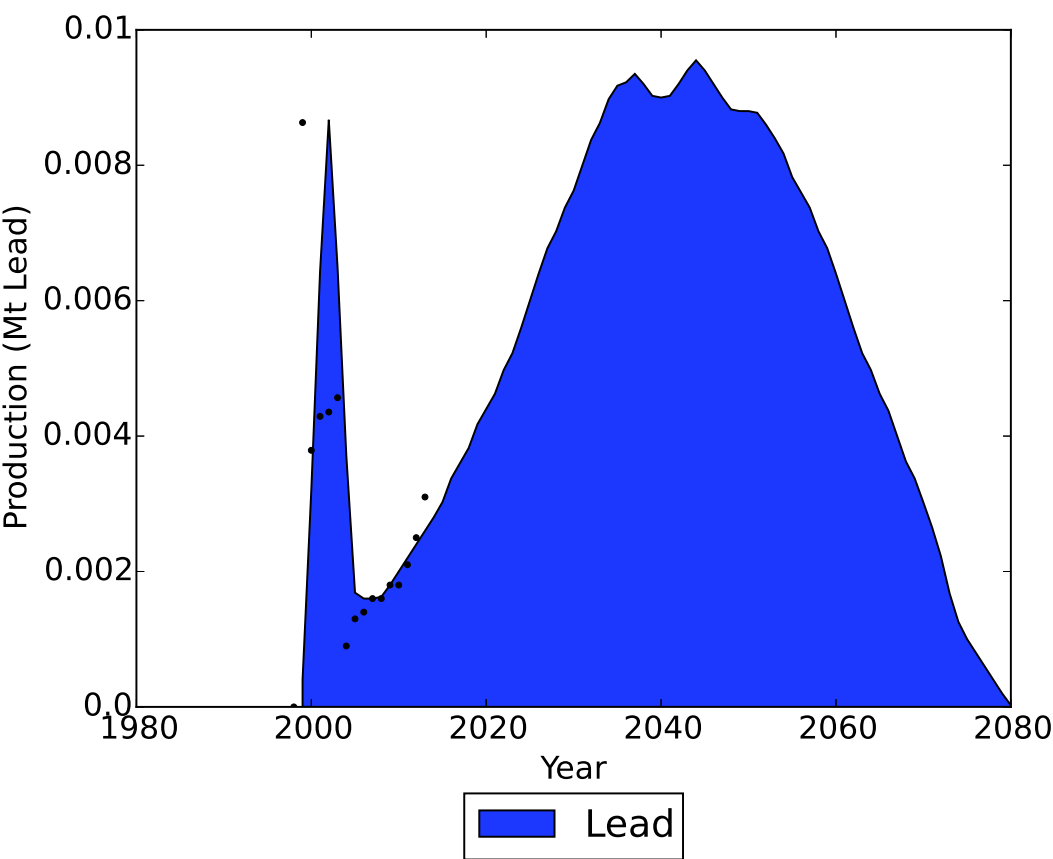

Figure 4.40: Serbia projection by mineral type

| Table 4.40: Peak years - Minerals |      |           |           |
|-----------------------------------|------|-----------|-----------|
| Name                              | URR  | Peak Year | Peak Rate |
| Lead                              | 0.45 | 2044      | 0.01      |
| Total                             | 0.45 | 2044      | 0.01      |

# 4.21 Slovakia

## 4.21.1 All Projections

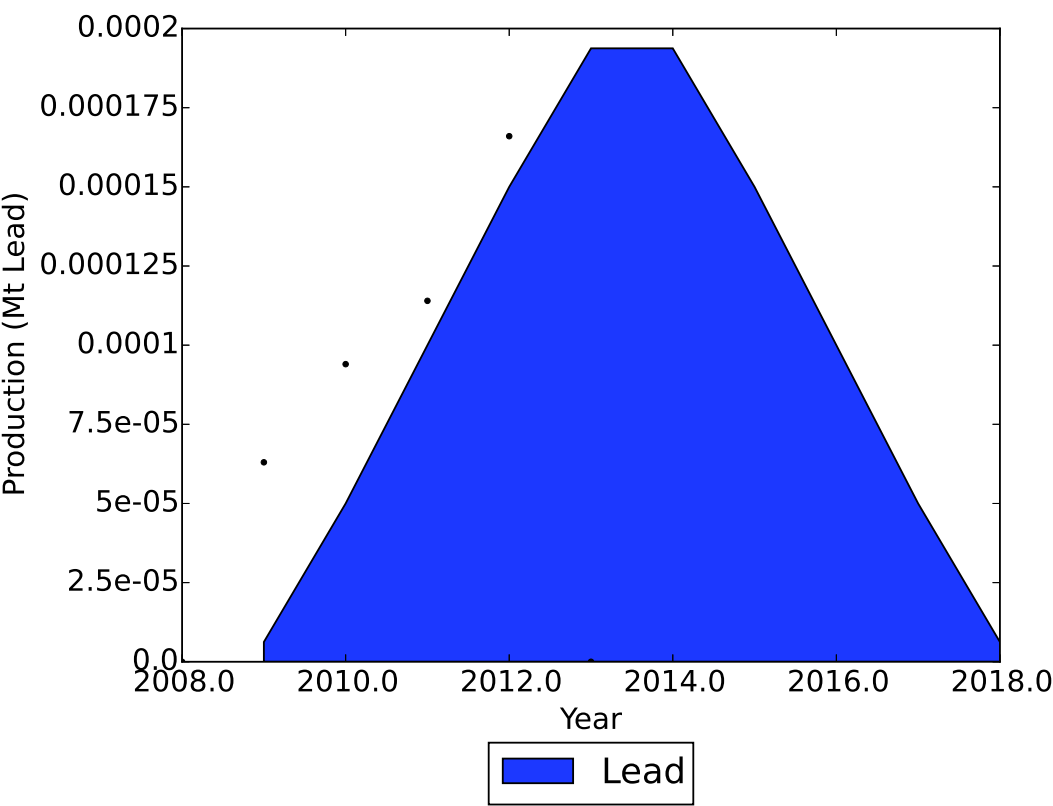

Figure 4.41: Slovakia projections capped at 16

| Table 4.41: Peak years - All |     |           |           |
|------------------------------|-----|-----------|-----------|
| Name                         | URR | Peak Year | Peak Rate |
| Lead                         | –   | 2013      | –         |
| Total                        | –   | 2013      | –         |

4.21.2 By Mineral

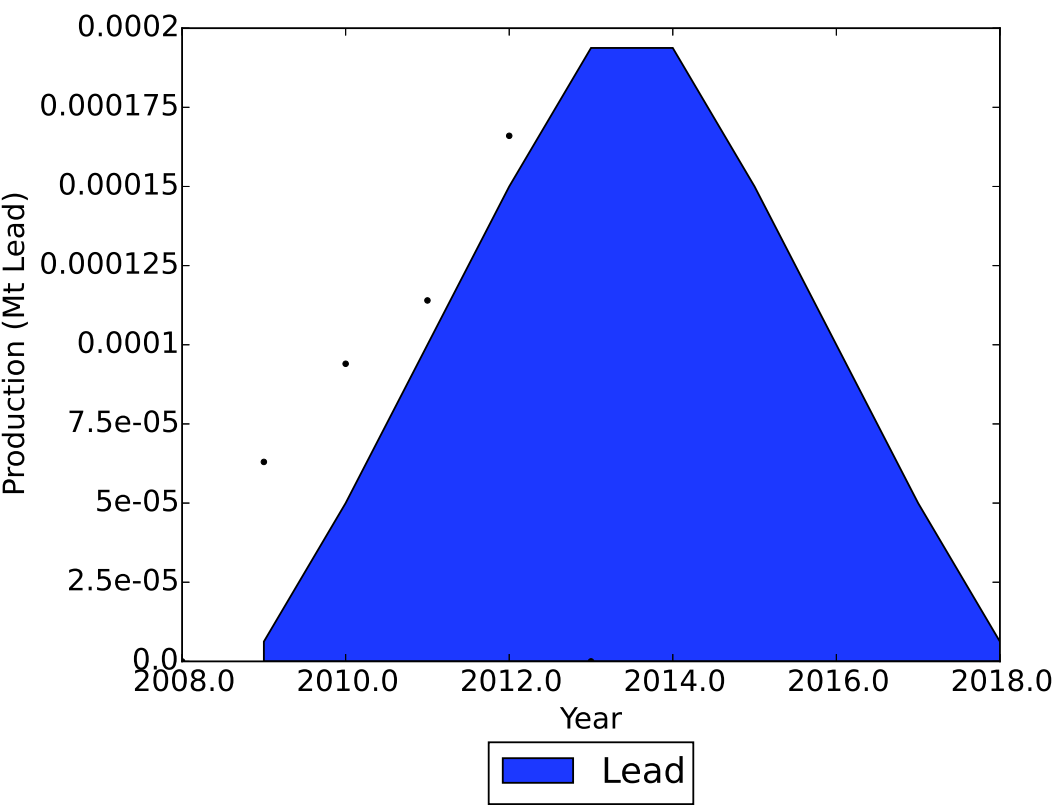

Figure 4.42: Slovakia projection by mineral type

| Table 4.42: Peak years - Minerals |     |           |           |
|-----------------------------------|-----|-----------|-----------|
| Name                              | URR | Peak Year | Peak Rate |
| Lead                              | –   | 2013      | –         |
| Total                             | –   | 2013      | –         |

4.22 Slovenia

4.22.1 All Projections

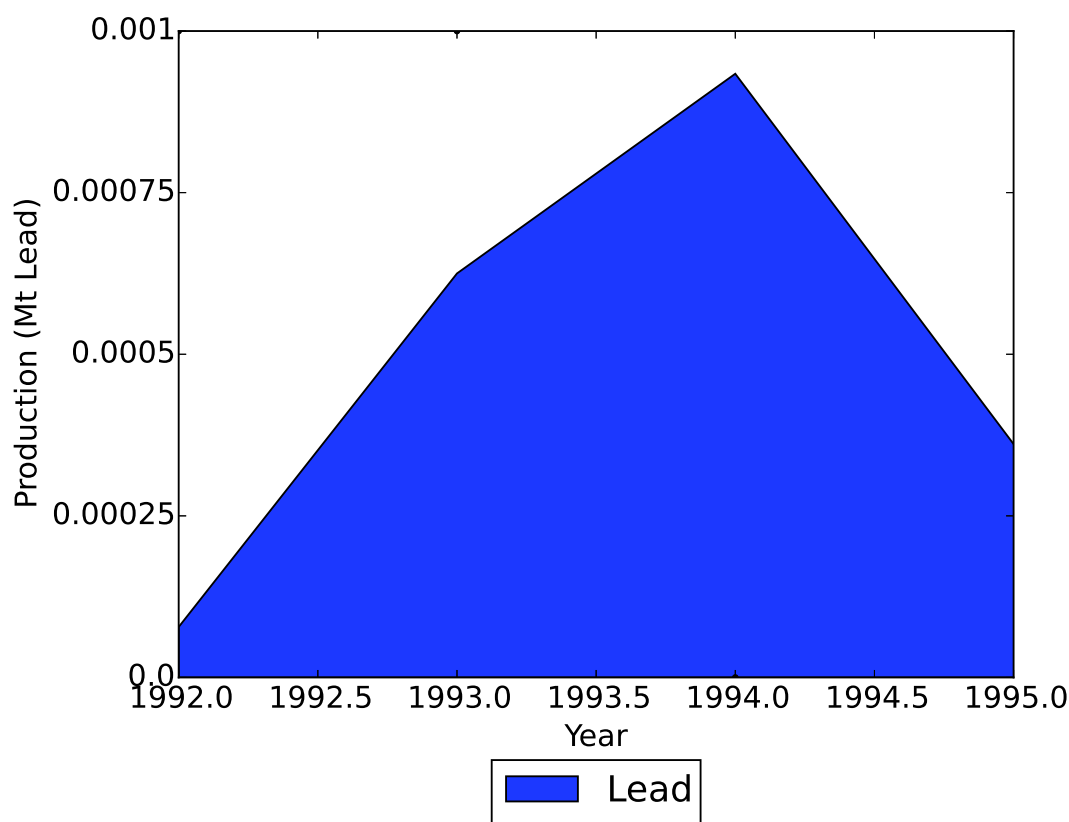

Figure 4.43: Slovenia projections capped at 16

| Table 4.43: Peak years - All |     |           |           |
|------------------------------|-----|-----------|-----------|
| Name                         | URR | Peak Year | Peak Rate |
| Lead                         | –   | 1994      | –         |
| Total                        | –   | 1994      | –         |

#### 4.22.2 By Mineral

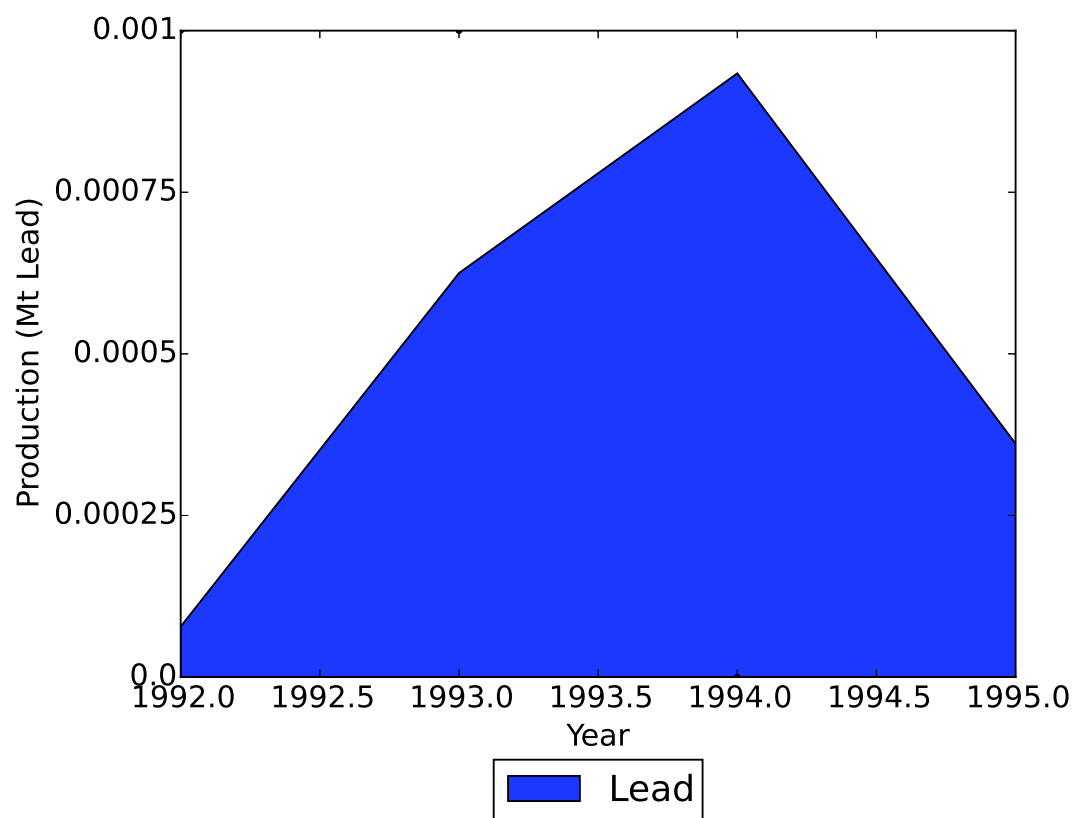

Figure 4.44: Slovenia projection by mineral type

| Table 4.44: Peak years - Minerals |     |             |           |
|-----------------------------------|-----|-------------|-----------|
| Name                              | URR | Peak Year   | Peak Rate |
| Lead                              | –   | 1994        | –         |
| <b>Total</b>                      | –   | <b>1994</b> | –         |

4.23 Spain

4.23.1 All Projections

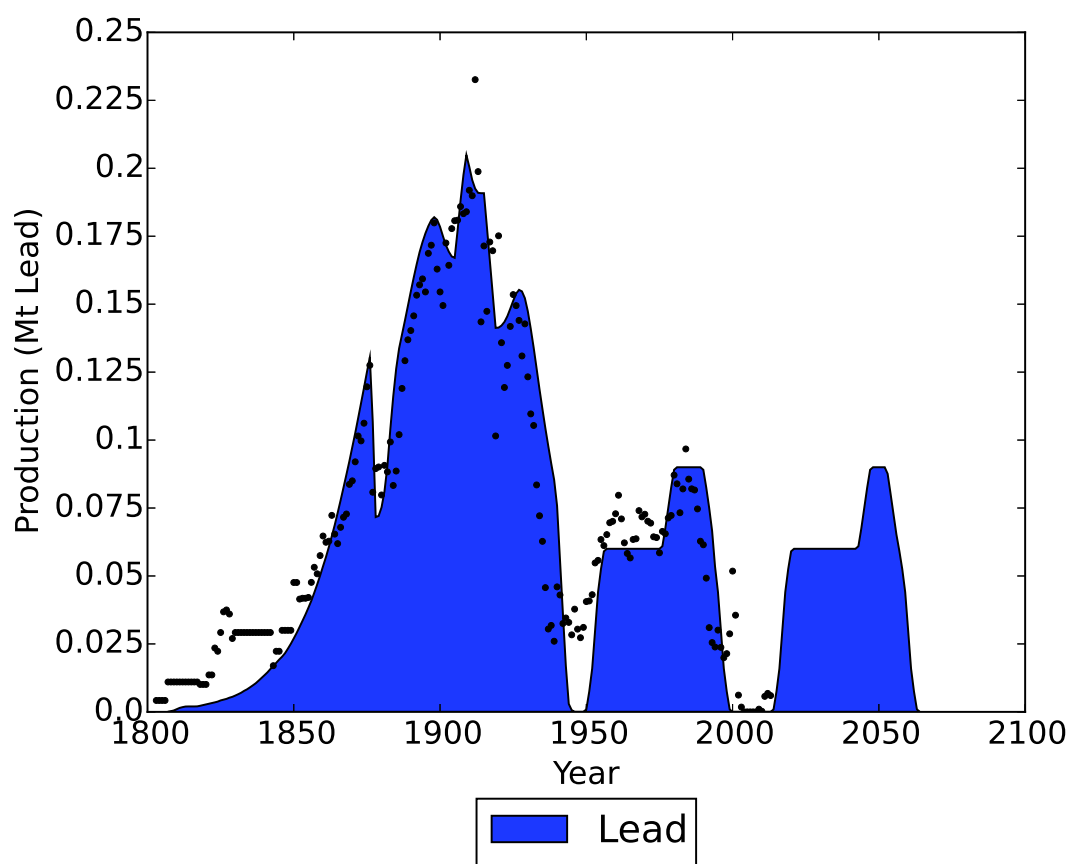

Figure 4.45: Spain projections capped at 16

Table 4.45: Peak years - All

| Name  | URR   | Peak Year | Peak Rate |
|-------|-------|-----------|-----------|
| Lead  | 17.66 | 1909      | 0.2       |
| Total | 17.66 | 1909      | 0.2       |

4.23.2 By Mineral

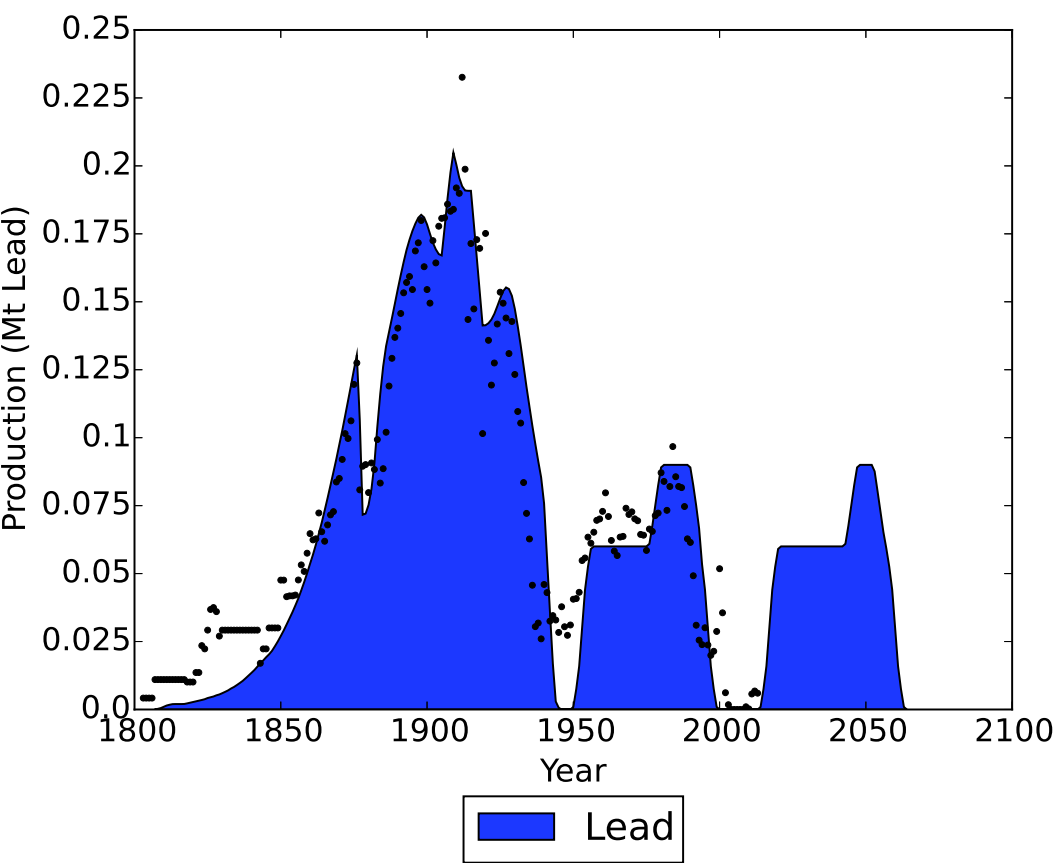

Figure 4.46: Spain projection by mineral type

| Table 4.46: Peak years - Minerals |       |           |           |
|-----------------------------------|-------|-----------|-----------|
| Name                              | URR   | Peak Year | Peak Rate |
| Lead                              | 17.66 | 1909      | 0.2       |
| Total                             | 17.66 | 1909      | 0.2       |

4.24 Sweden

4.24.1 All Projections

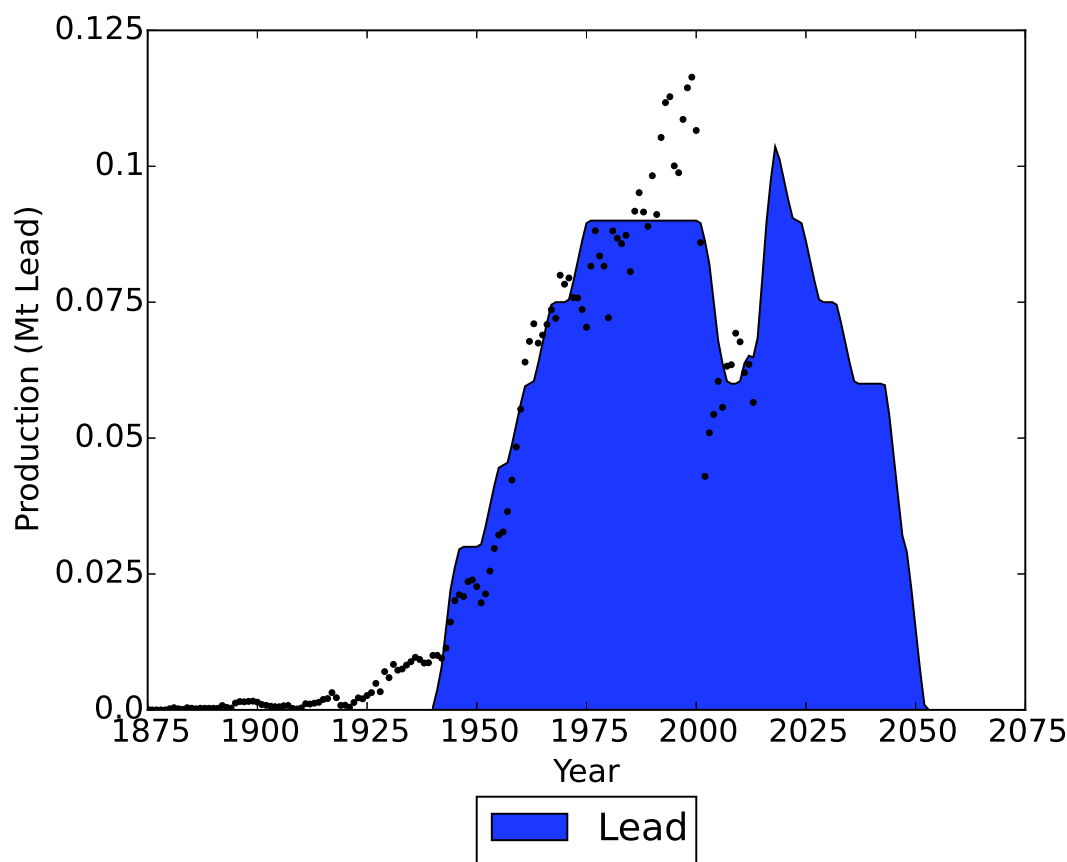

Figure 4.47: Sweden projections capped at 16

| Table 4.47: Peak years - All |      |           |           |
|------------------------------|------|-----------|-----------|
| Name                         | URR  | Peak Year | Peak Rate |
| Lead                         | 7.46 | 2018      | 0.1       |
| Total                        | 7.46 | 2018      | 0.1       |



4.24.2 By Mineral

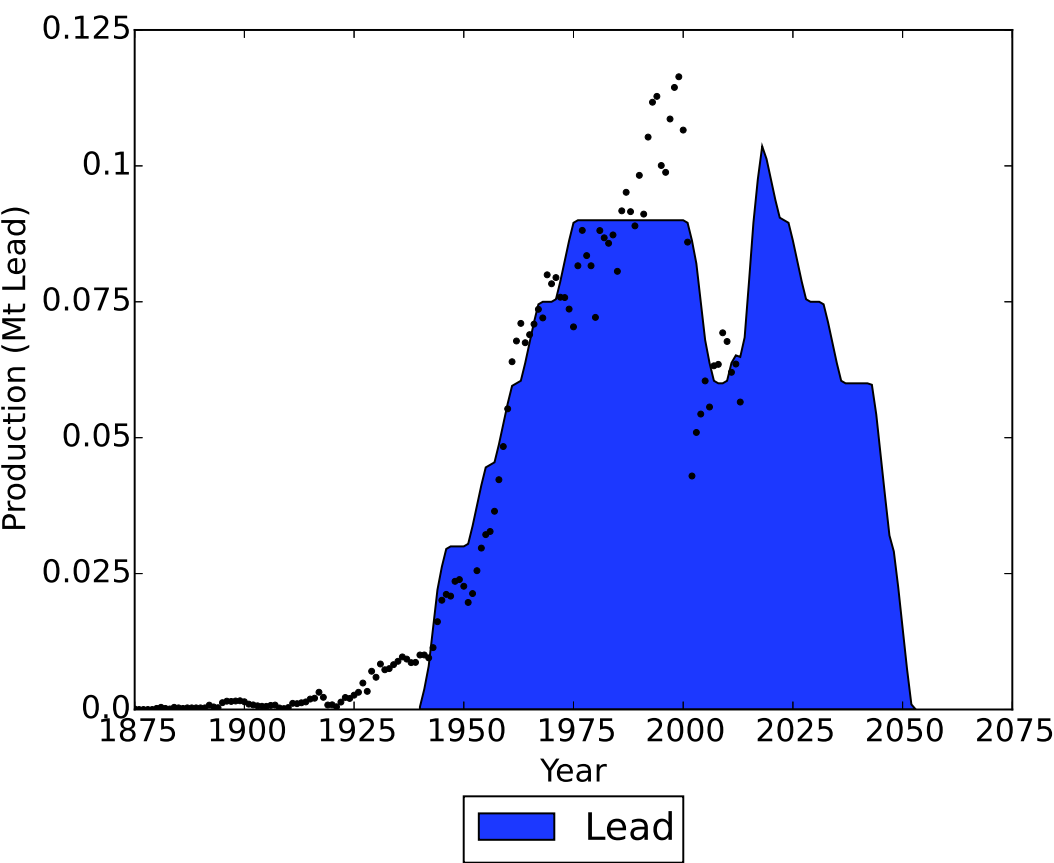

Figure 4.48: Sweden projection by mineral type

| Table 4.48: Peak years - Minerals |      |           |           |
|-----------------------------------|------|-----------|-----------|
| Name                              | URR  | Peak Year | Peak Rate |
| Lead                              | 7.46 | 2018      | 0.1       |
| Total                             | 7.46 | 2018      | 0.1       |

4.25 Turkey

4.25.1 All Projections

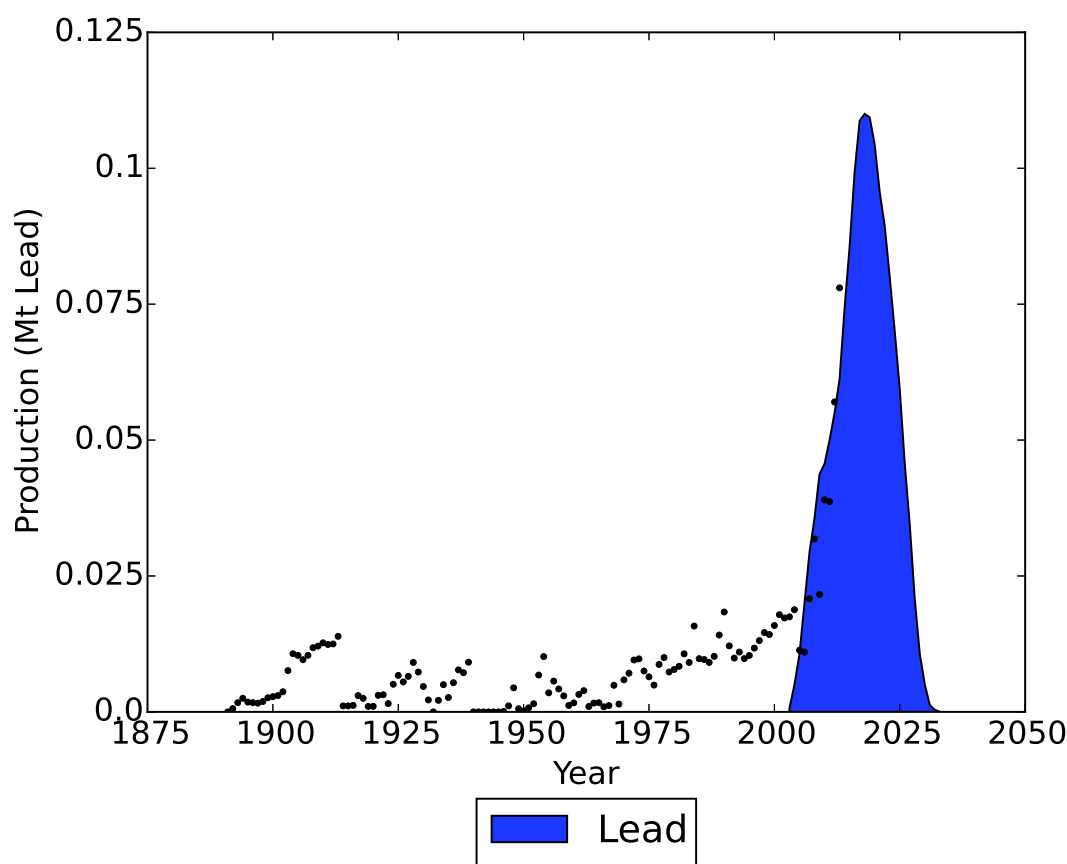

Figure 4.49: Turkey projections capped at 16

| Table 4.49: Peak years - All |      |           |           |
|------------------------------|------|-----------|-----------|
| Name                         | URR  | Peak Year | Peak Rate |
| Lead                         | 1.56 | 2018      | 0.11      |
| Total                        | 1.56 | 2018      | 0.11      |

4.25.2 By Mineral

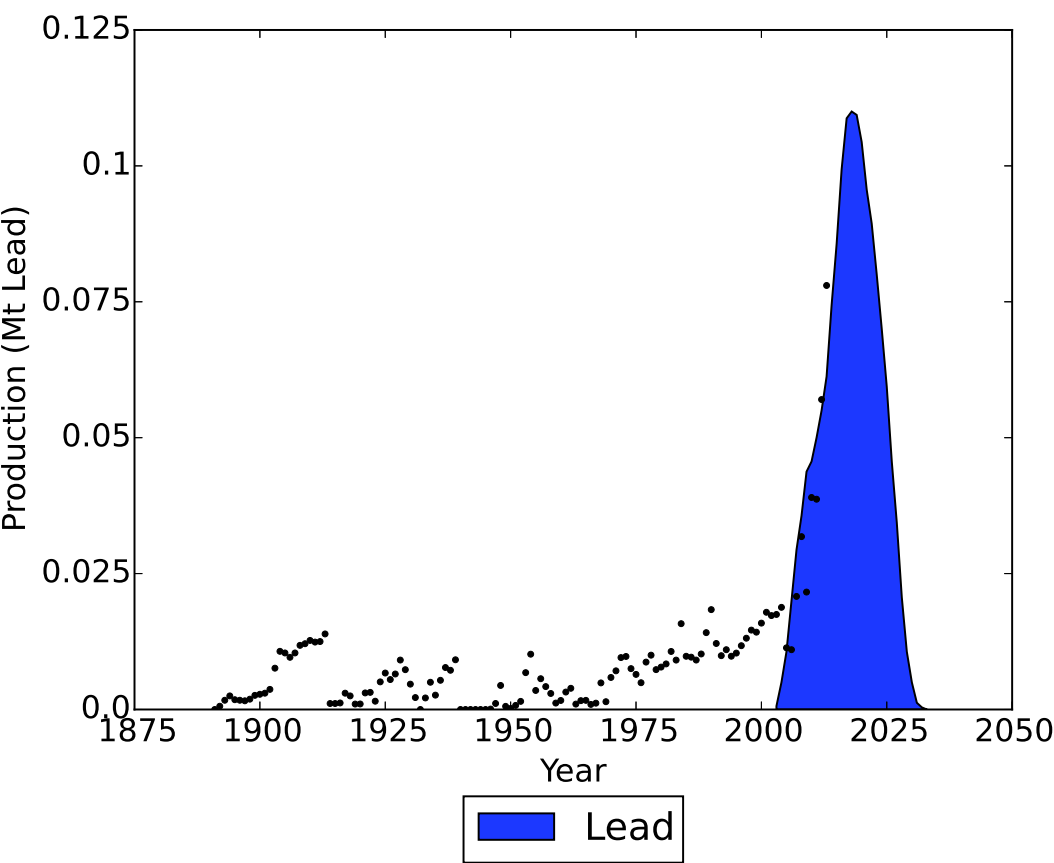

Figure 4.50: Turkey projection by mineral type

| Table 4.50: Peak years - Minerals |             |             |             |
|-----------------------------------|-------------|-------------|-------------|
| Name                              | URR         | Peak Year   | Peak Rate   |
| Lead                              | 1.56        | 2018        | 0.11        |
| <b>Total</b>                      | <b>1.56</b> | <b>2018</b> | <b>0.11</b> |

4.26 UK

4.26.1 All Projections

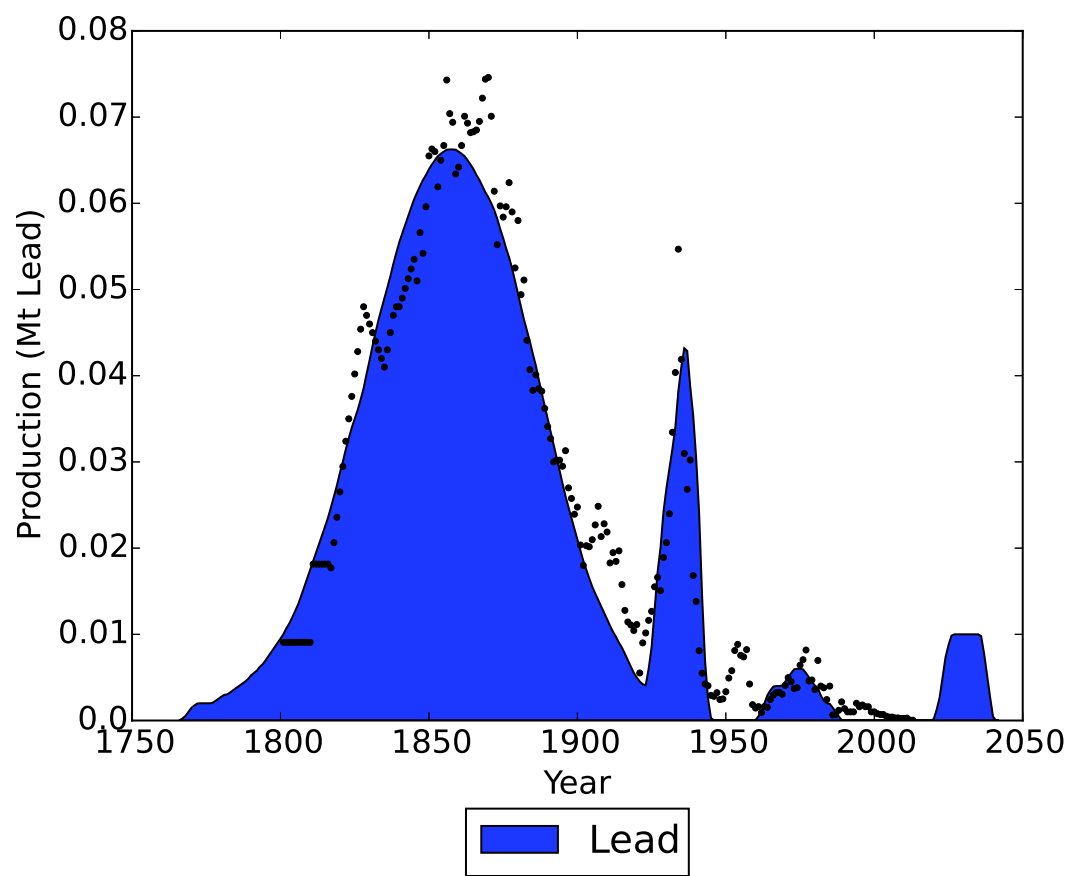

Figure 4.51: UK projections capped at 16

| Table 4.51: Peak years - All |      |           |           |
|------------------------------|------|-----------|-----------|
| Name                         | URR  | Peak Year | Peak Rate |
| Lead                         | 5.52 | 1857      | 0.07      |
| Total                        | 5.52 | 1857      | 0.07      |

4.26.2 By Mineral

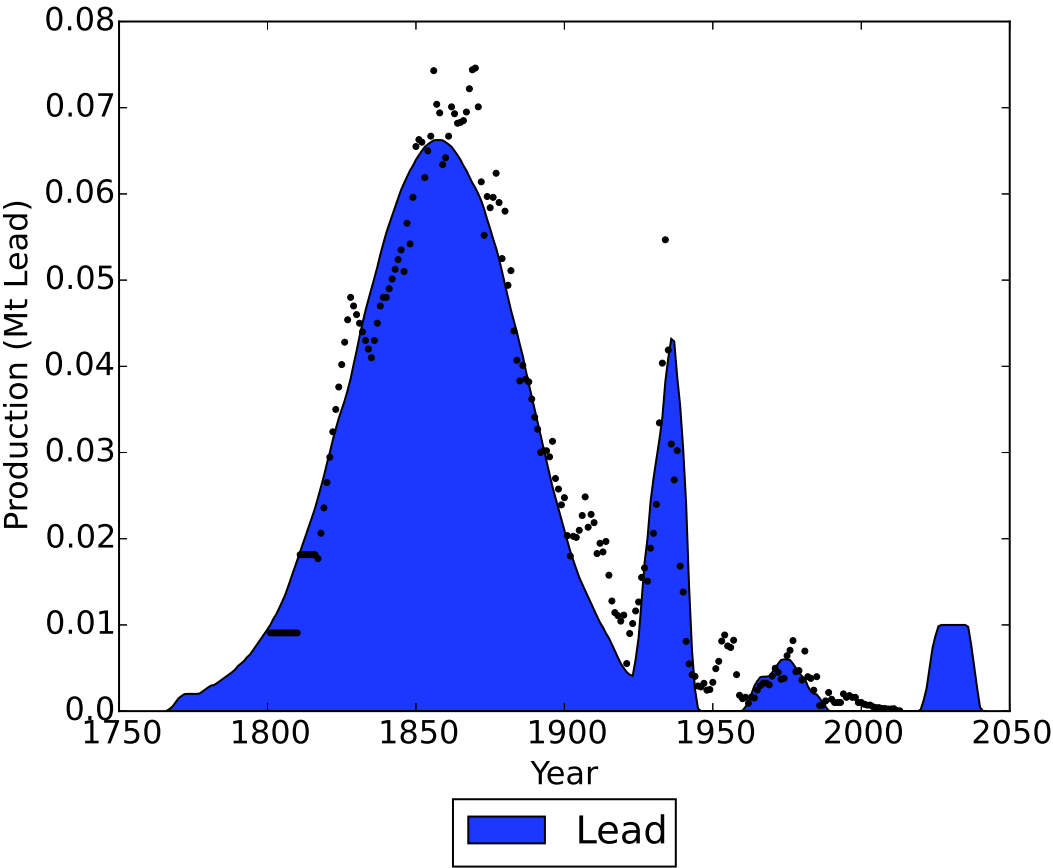

Figure 4.52: UK projection by mineral type

| Table 4.52: Peak years - Minerals |      |           |           |
|-----------------------------------|------|-----------|-----------|
| Name                              | URR  | Peak Year | Peak Rate |
| Lead                              | 5.52 | 1857      | 0.07      |
| Total                             | 5.52 | 1857      | 0.07      |

4.27 Yugoslavia

4.27.1 All Projections

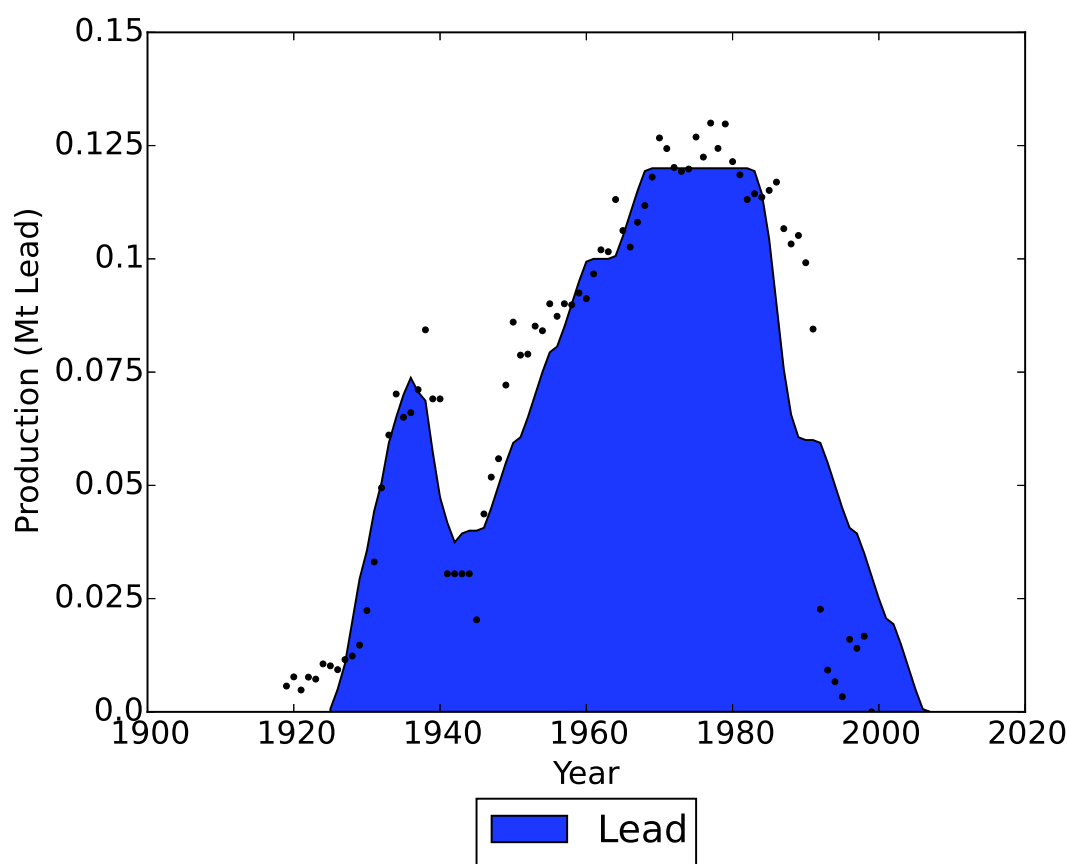

Figure 4.53: Yugoslavia projections capped at 16

| Table 4.53: Peak years - All |      |           |           |
|------------------------------|------|-----------|-----------|
| Name                         | URR  | Peak Year | Peak Rate |
| Lead                         | 5.69 | 1969      | 0.12      |
| Total                        | 5.69 | 1969      | 0.12      |

4.27.2 By Mineral

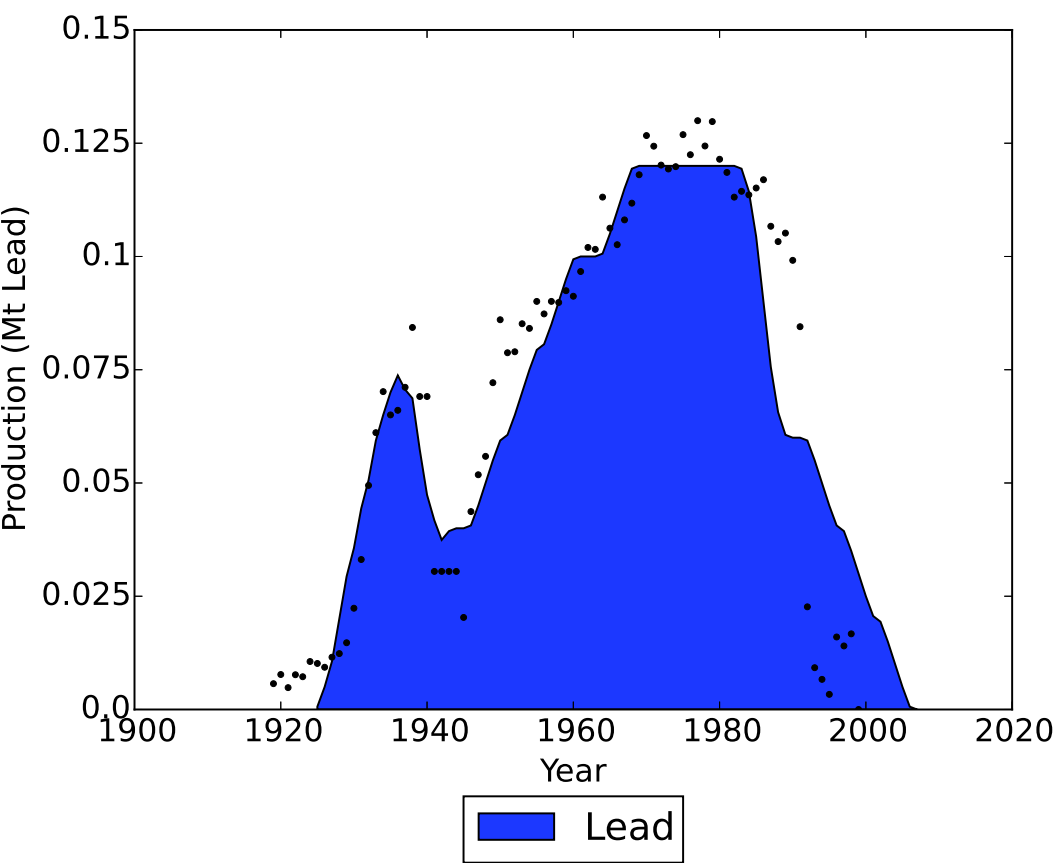

Figure 4.54: Yugoslavia projection by mineral type

| Table 4.54: Peak years - Minerals |             |             |             |
|-----------------------------------|-------------|-------------|-------------|
| Name                              | URR         | Peak Year   | Peak Rate   |
| Lead                              | 5.69        | 1969        | 0.12        |
| <b>Total</b>                      | <b>5.69</b> | <b>1969</b> | <b>0.12</b> |

4.28 Total

4.28.1 By country

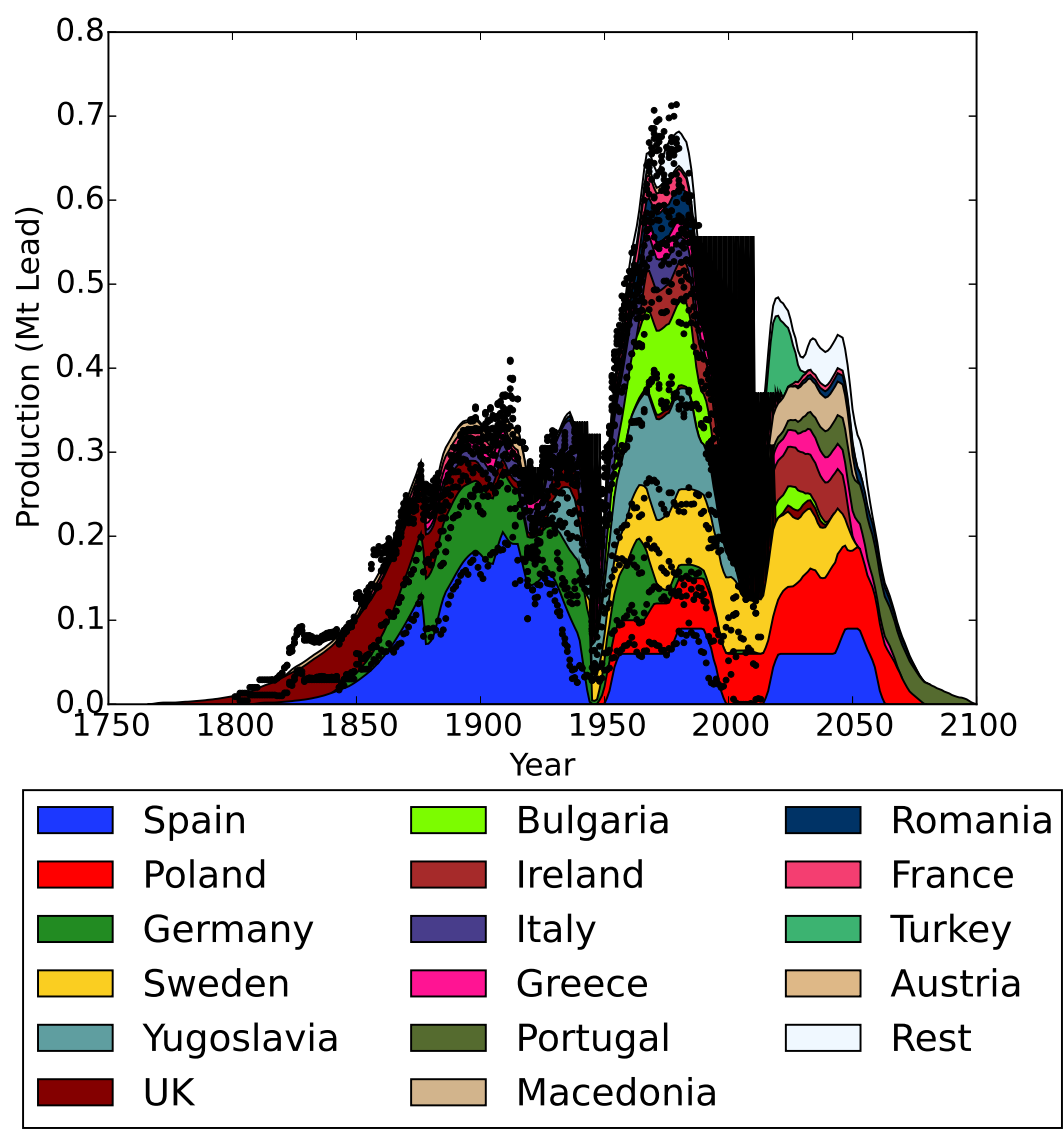

Figure 4.55: Europe projections by country



Table 4.55: Peak years - All

| <b>Name</b>            | <b>URR</b>   | <b>Peak Year</b> | <b>Peak Rate</b> |
|------------------------|--------------|------------------|------------------|
| Spain                  | 17.66        | 1909             | 0.2              |
| Poland                 | 8.23         | 2044             | 0.11             |
| Germany                | 8.07         | 1944             | 0.1              |
| Sweden                 | 7.46         | 2018             | 0.1              |
| Yugoslavia             | 5.69         | 1969             | 0.12             |
| UK                     | 5.52         | 1857             | 0.07             |
| Bulgaria               | 4.17         | 1969             | 0.1              |
| Ireland                | 3.91         | 1968             | 0.05             |
| Italy                  | 3.16         | 1952             | 0.05             |
| Greece                 | 2.79         | 2048             | 0.03             |
| Portugal               | 2.32         | 2058             | 0.05             |
| Macedonia              | 2.08         | 2010             | 0.04             |
| Romania                | 1.82         | 1978             | 0.04             |
| France                 | 1.61         | 1967             | 0.03             |
| Turkey                 | 1.56         | 2018             | 0.11             |
| Austria                | 1.21         | 1917             | 0.03             |
| Greenland              | 1.21         | 2048             | 0.03             |
| Serbia                 | 0.45         | 2044             | 0.01             |
| Czechoslovakia         | 0.35         | 1967             | 0.01             |
| Norway                 | 0.14         | 1962             | –                |
| Montenegro             | 0.13         | 2023             | 0.01             |
| Finland                | 0.12         | 1960             | –                |
| Kosovo                 | 0.1          | 2012             | 0.01             |
| Bosnia and Herzegovina | 0.09         | 2018             | 0.01             |
| Hungary                | 0.08         | 1894             | –                |
| Slovenia               | –            | 1994             | –                |
| Slovakia               | –            | 2013             | –                |
| <b>Total</b>           | <b>79.91</b> | <b>1980</b>      | <b>0.68</b>      |

4.28.2 By mineral

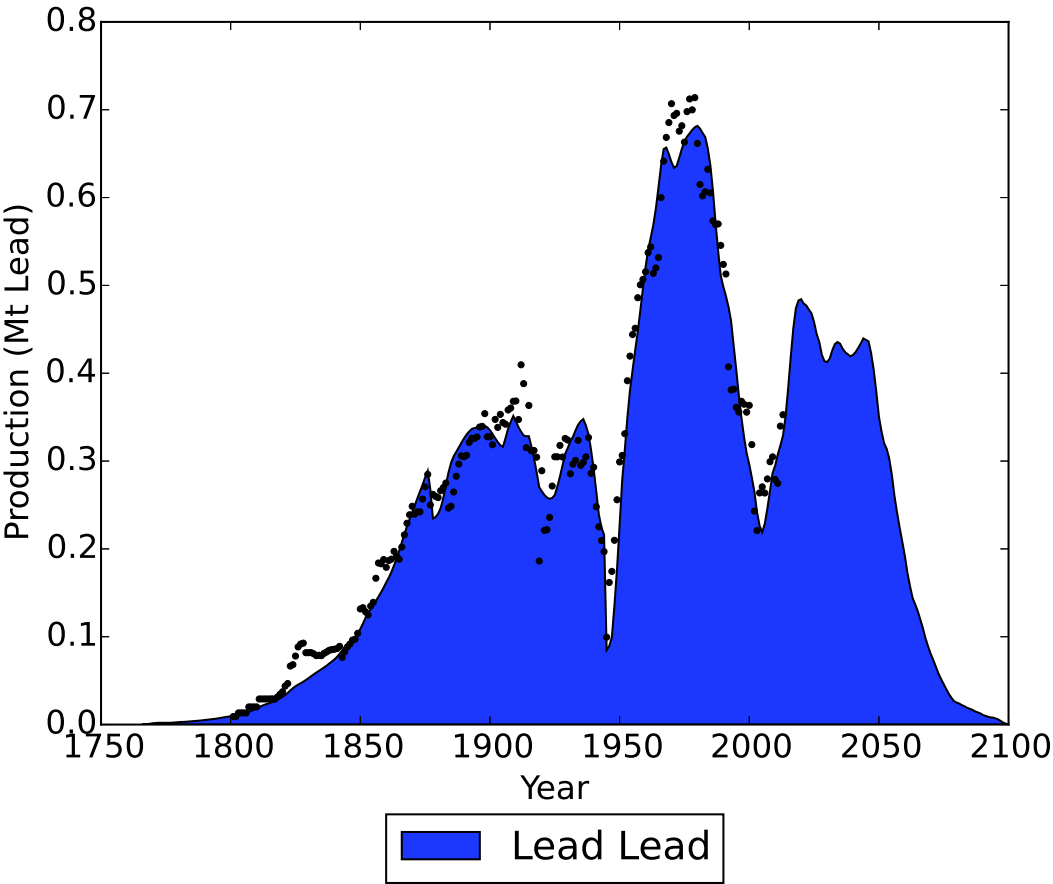

Figure 4.56: Europe projection by mineral type

| Table 4.56: Peak years - Minerals |              |             |             |
|-----------------------------------|--------------|-------------|-------------|
| Name                              | URR          | Peak Year   | Peak Rate   |
| Lead Lead                         | 79.91        | 1980        | 0.68        |
| <b>Total</b>                      | <b>79.91</b> | <b>1980</b> | <b>0.68</b> |

# Chapter 5

## FSU

### 5.1 FSU

#### 5.1.1 All Projections

Table 5.1: Peak years - All

| Name  | URR   | Peak Year | Peak Rate |
|-------|-------|-----------|-----------|
| Lead  | 65.92 | 2041      | 0.98      |
| Total | 65.92 | 2041      | 0.98      |

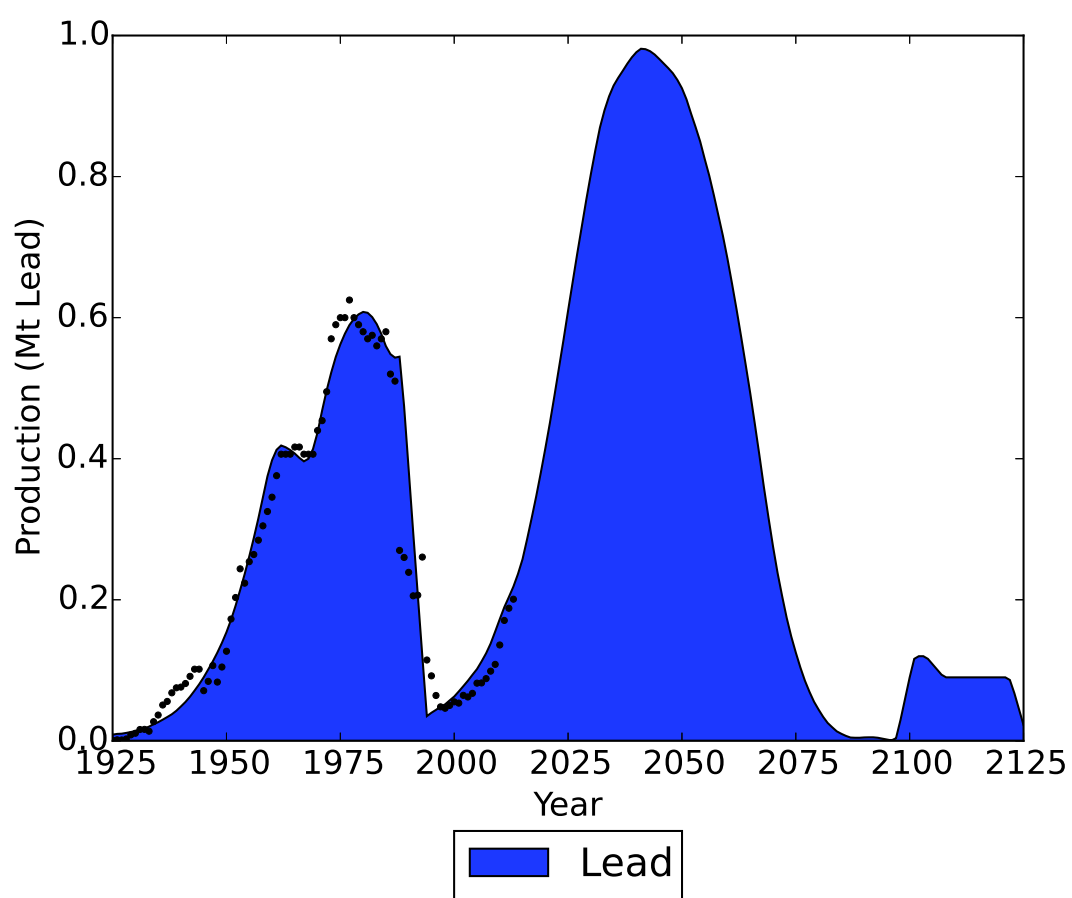

Figure 5.1: FSU projections capped at 16

5.1.2 By Mineral

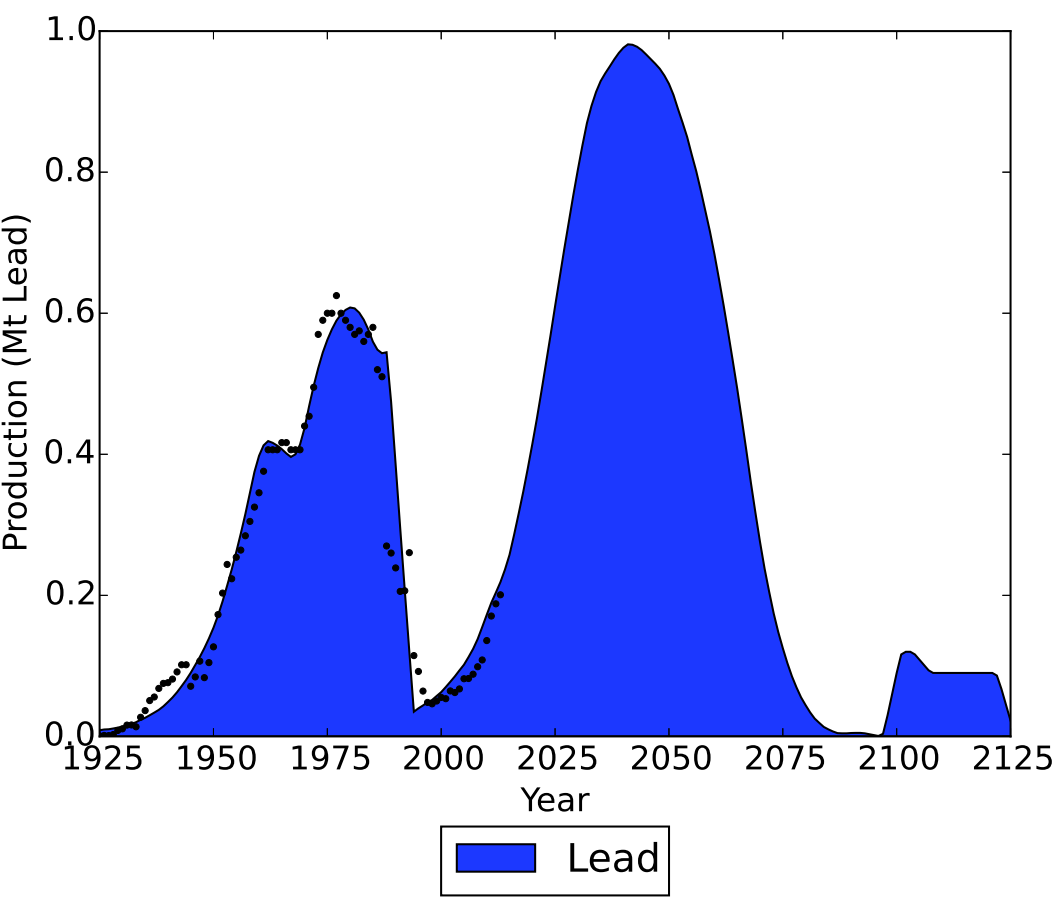

Figure 5.2: FSU projection by mineral type

| Table 5.2: Peak years - Minerals |       |           |           |
|----------------------------------|-------|-----------|-----------|
| Name                             | URR   | Peak Year | Peak Rate |
| Lead                             | 65.92 | 2041      | 0.98      |
| Total                            | 65.92 | 2041      | 0.98      |

5.2 Total

5.2.1 By country

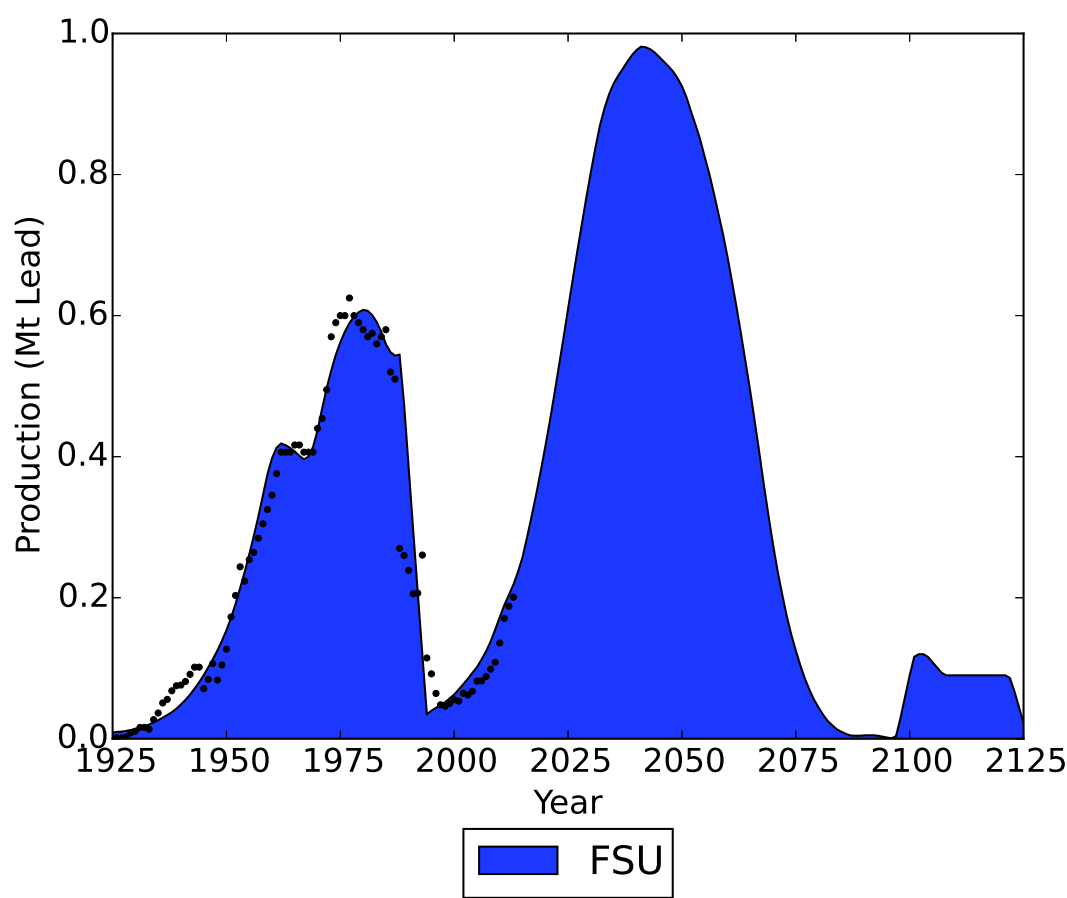

Figure 5.3: FSU projections by country

| Table 5.3: Peak years - All |       |           |           |
|-----------------------------|-------|-----------|-----------|
| Name                        | URR   | Peak Year | Peak Rate |
| FSU                         | 65.92 | 2041      | 0.98      |
| Total                       | 65.92 | 2041      | 0.98      |

5.2.2 By mineral

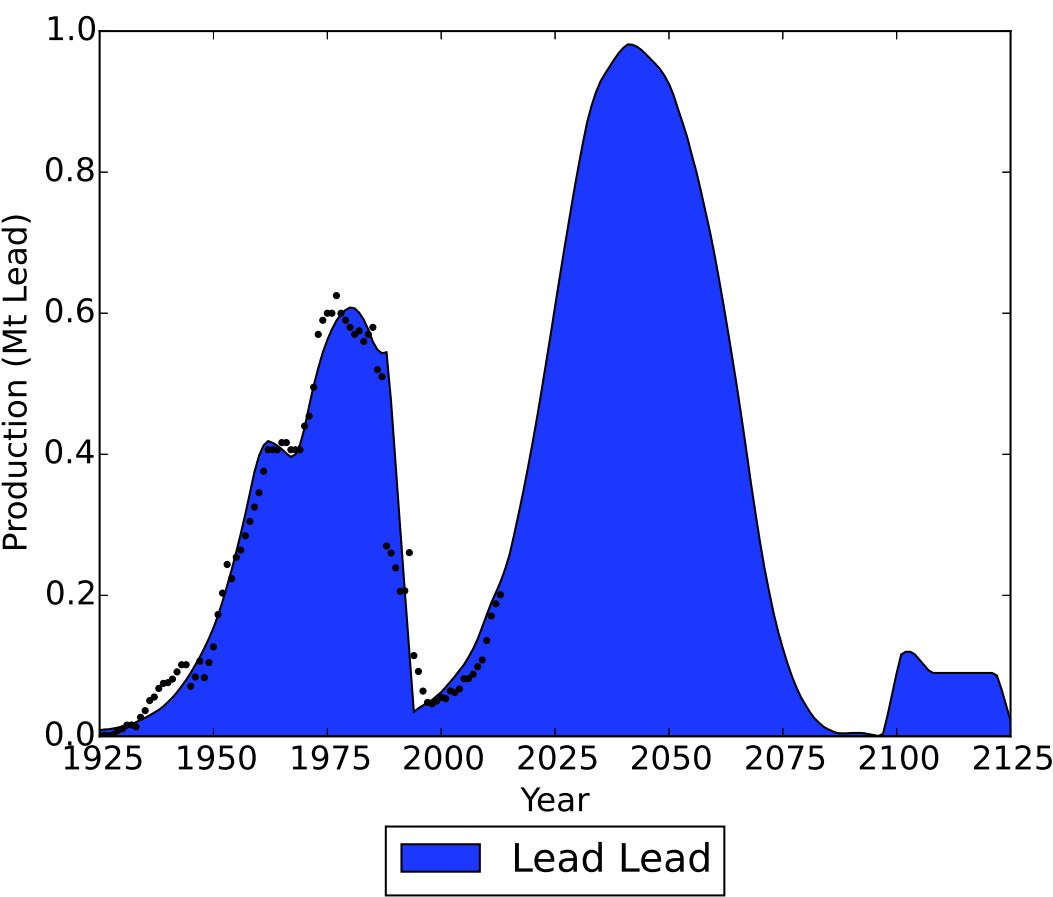

Figure 5.4: FSU projection by mineral type

| Table 5.4: Peak years - Minerals |              |             |             |
|----------------------------------|--------------|-------------|-------------|
| Name                             | URR          | Peak Year   | Peak Rate   |
| Lead Lead                        | 65.92        | 2041        | 0.98        |
| <b>Total</b>                     | <b>65.92</b> | <b>2041</b> | <b>0.98</b> |

## Chapter 6

# North America

### 6.1 Canada

#### 6.1.1 All Projections

Table 6.1: Peak years - All

| <b>Name</b>  | <b>URR</b>   | <b>Peak Year</b> | <b>Peak Rate</b> |
|--------------|--------------|------------------|------------------|
| Lead         | 42.19        | 2071             | 0.47             |
| <b>Total</b> | <b>42.19</b> | <b>2071</b>      | <b>0.47</b>      |



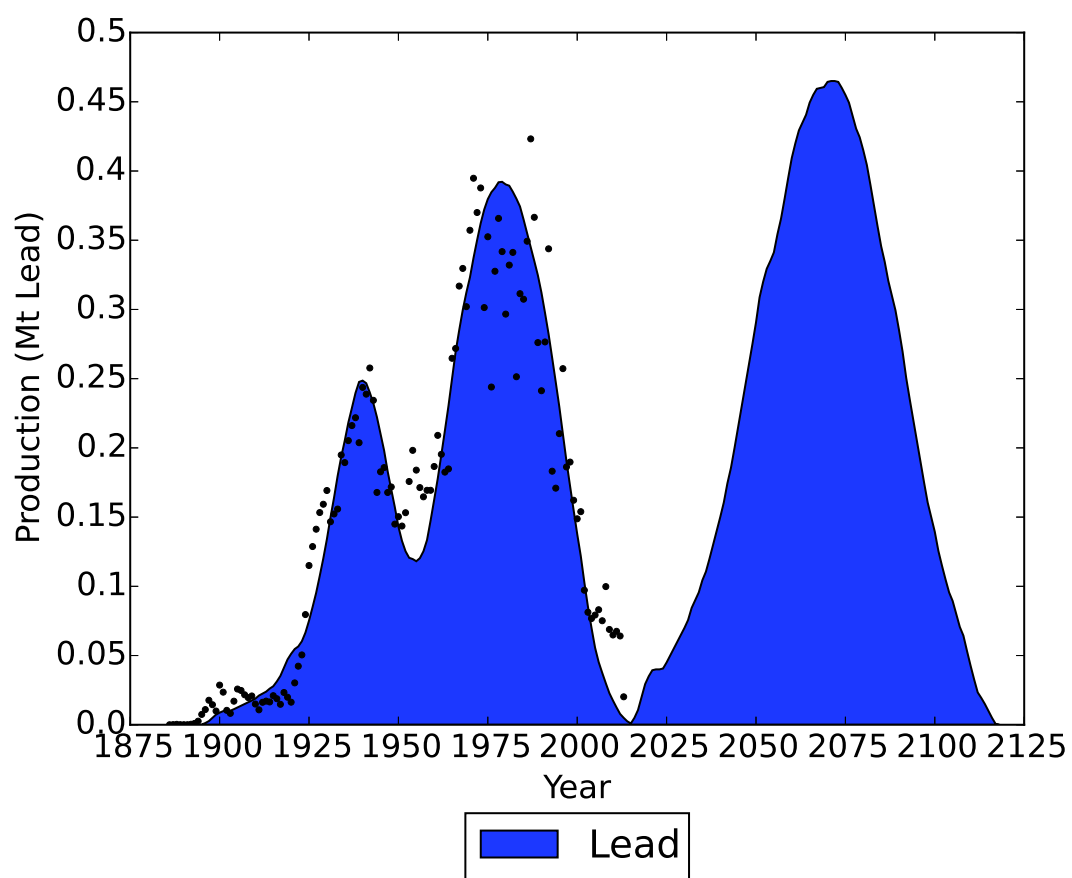

Figure 6.1: Canada projections capped at 16

6.1.2 By Mineral

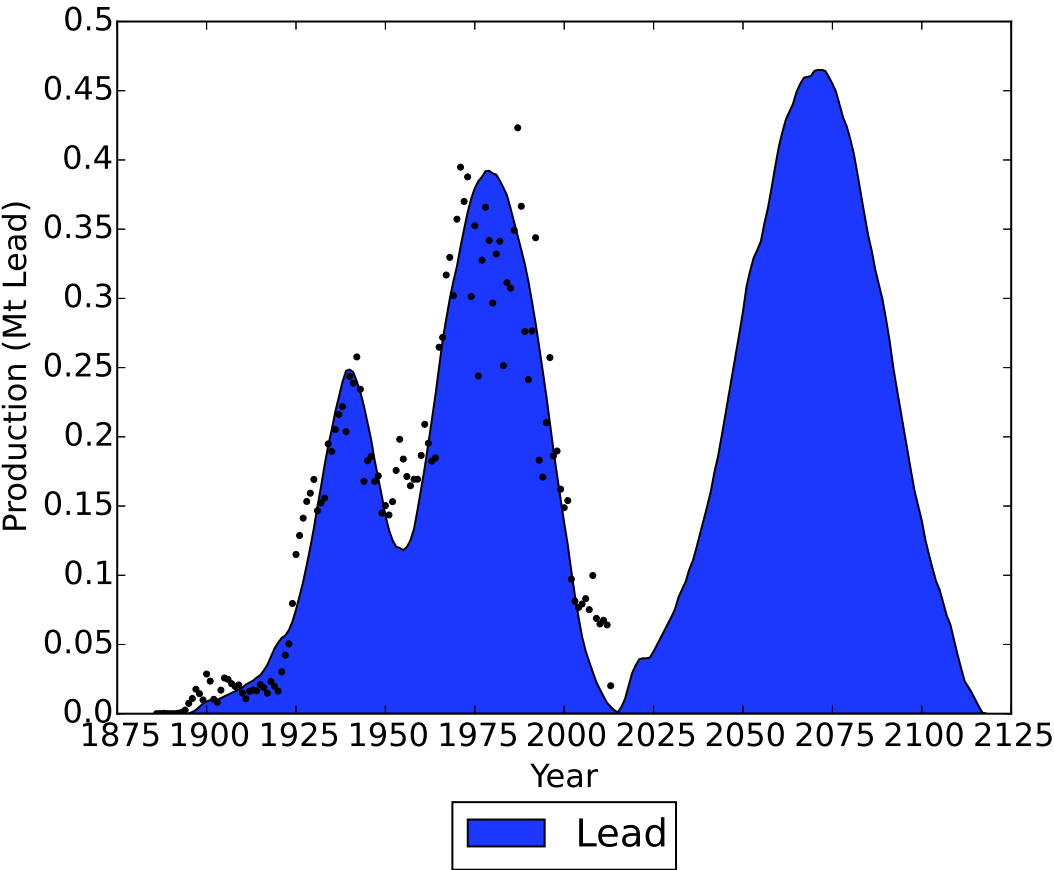

Figure 6.2: Canada projection by mineral type

| Table 6.2: Peak years - Minerals |       |           |           |
|----------------------------------|-------|-----------|-----------|
| Name                             | URR   | Peak Year | Peak Rate |
| Lead                             | 42.19 | 2071      | 0.47      |
| Total                            | 42.19 | 2071      | 0.47      |

6.2 USA

6.2.1 All Projections

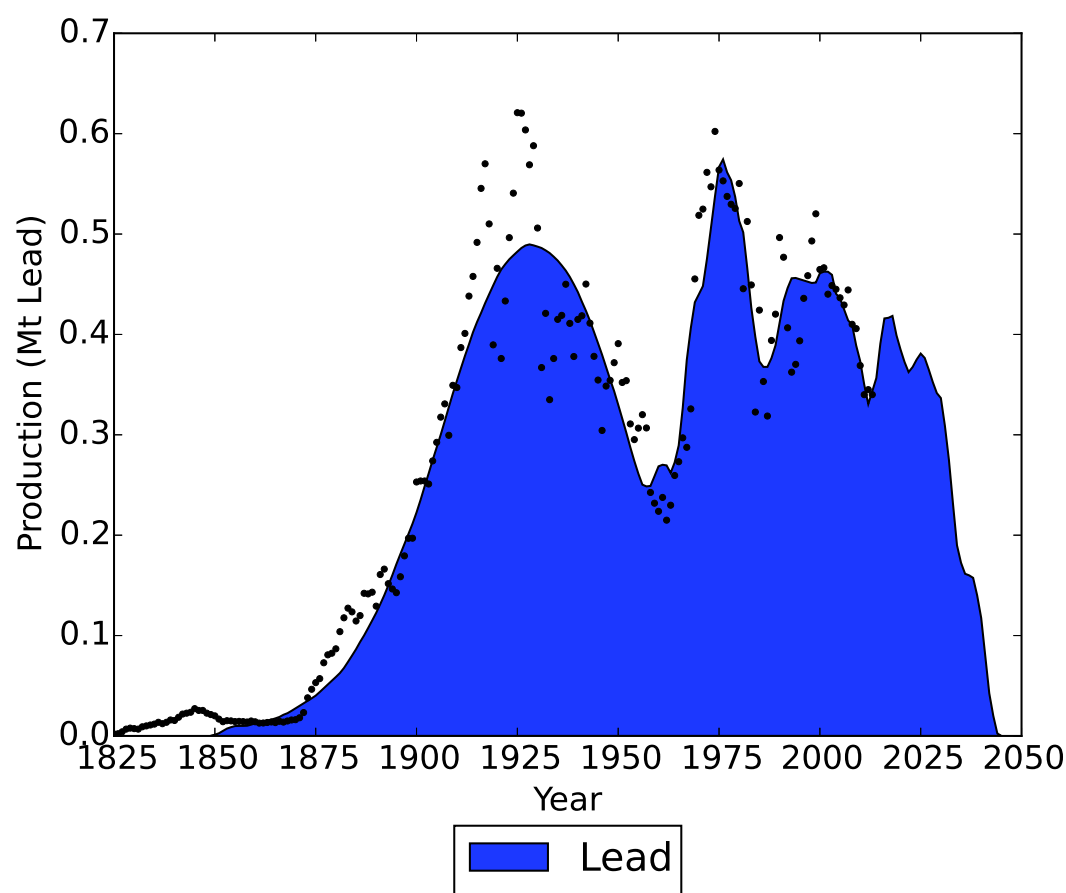

Figure 6.3: USA projections capped at 16

| Table 6.3: Peak years - All |       |           |           |
|-----------------------------|-------|-----------|-----------|
| Name                        | URR   | Peak Year | Peak Rate |
| Lead                        | 57.51 | 1976      | 0.57      |
| Total                       | 57.51 | 1976      | 0.57      |

6.2.2 By Mineral

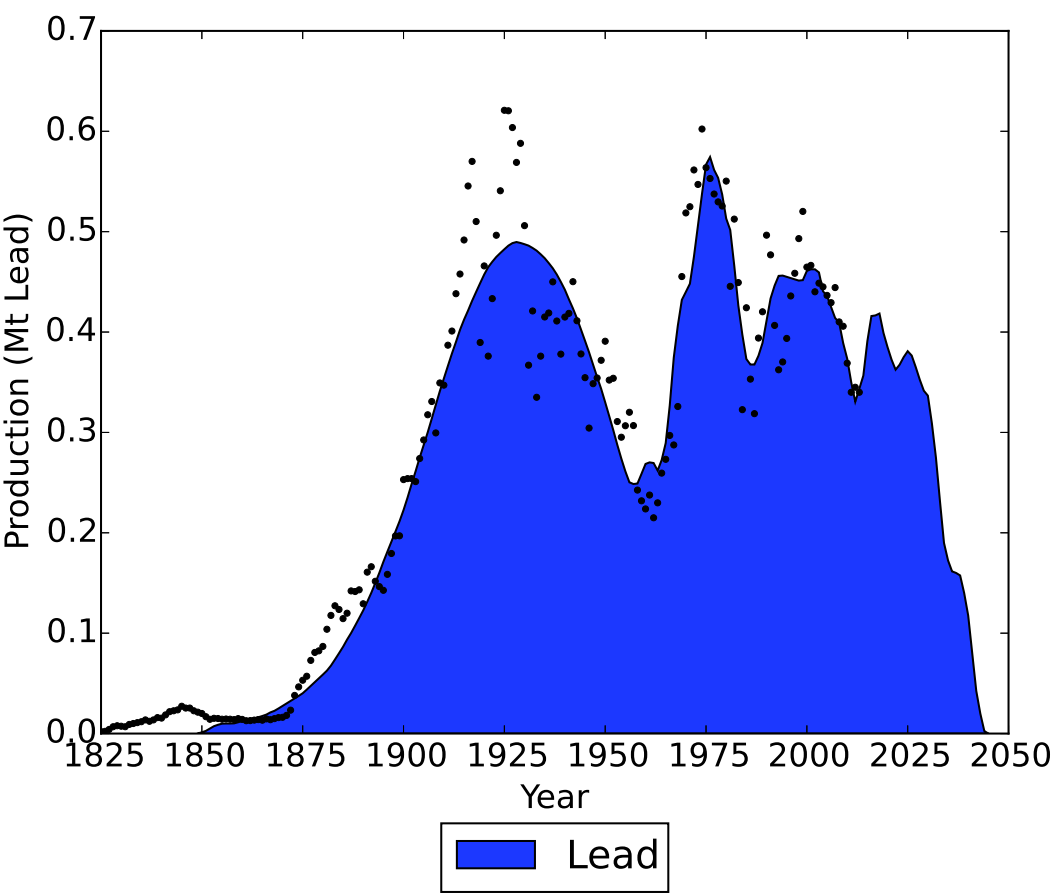

Figure 6.4: USA projection by mineral type

| Table 6.4: Peak years - Minerals |       |           |           |
|----------------------------------|-------|-----------|-----------|
| Name                             | URR   | Peak Year | Peak Rate |
| Lead                             | 57.51 | 1976      | 0.57      |
| Total                            | 57.51 | 1976      | 0.57      |

6.3 Total

6.3.1 By country

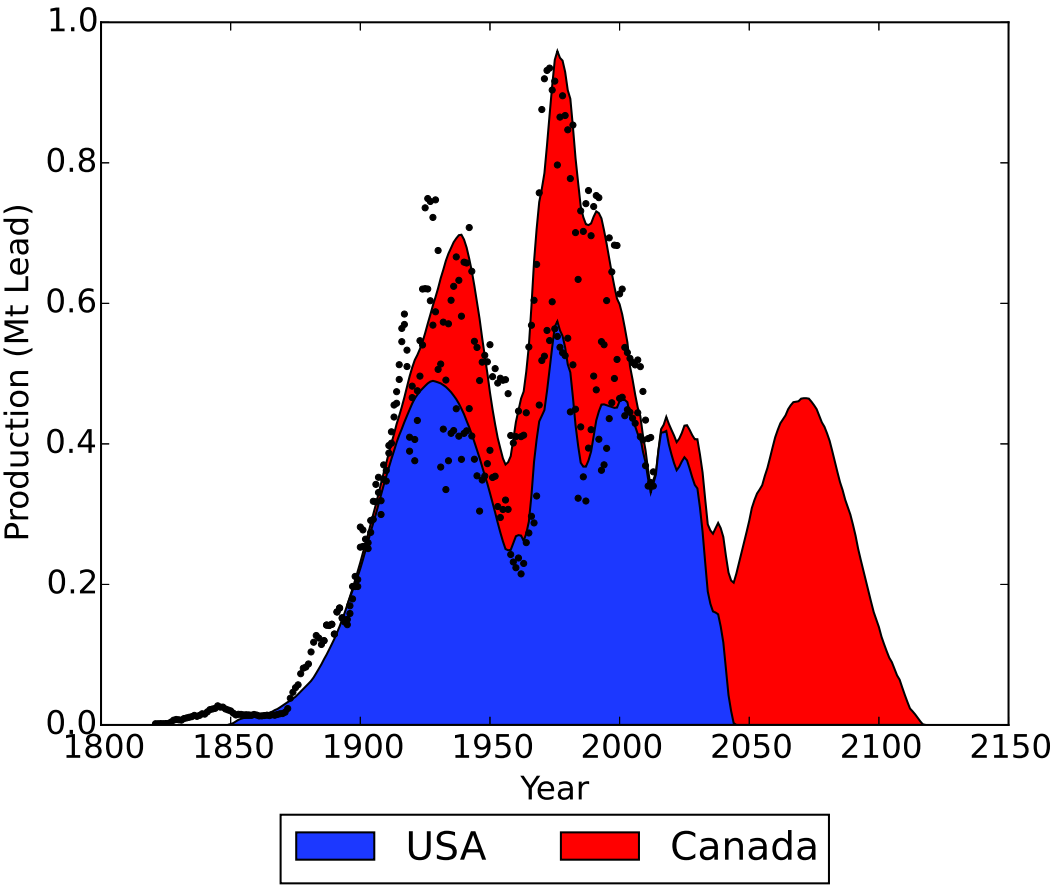

Figure 6.5: North America projections by country

| Table 6.5: Peak years - All |       |           |           |
|-----------------------------|-------|-----------|-----------|
| Name                        | URR   | Peak Year | Peak Rate |
| USA                         | 57.51 | 1976      | 0.57      |
| Canada                      | 42.19 | 2071      | 0.47      |
| Total                       | 99.7  | 1976      | 0.96      |

6.3.2 By mineral

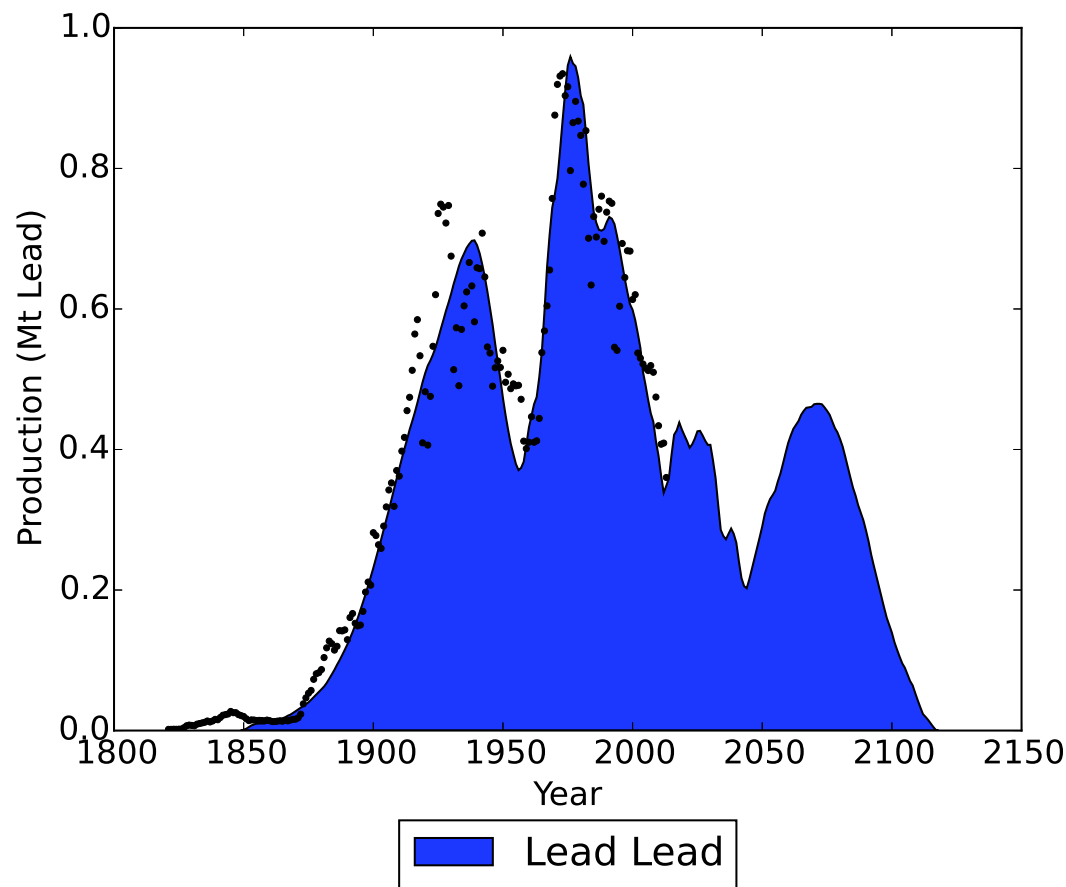

Figure 6.6: North America projection by mineral type

| Table 6.6: Peak years - Minerals |      |           |           |
|----------------------------------|------|-----------|-----------|
| Name                             | URR  | Peak Year | Peak Rate |
| Lead Lead                        | 99.7 | 1976      | 0.96      |
| Total                            | 99.7 | 1976      | 0.96      |

## Chapter 7

# South America

### 7.1 Argentina

#### 7.1.1 All Projections

Table 7.1: Peak years - All

| Name         | URR         | Peak Year   | Peak Rate   |
|--------------|-------------|-------------|-------------|
| Lead         | 4.33        | 2041        | 0.07        |
| <b>Total</b> | <b>4.33</b> | <b>2041</b> | <b>0.07</b> |

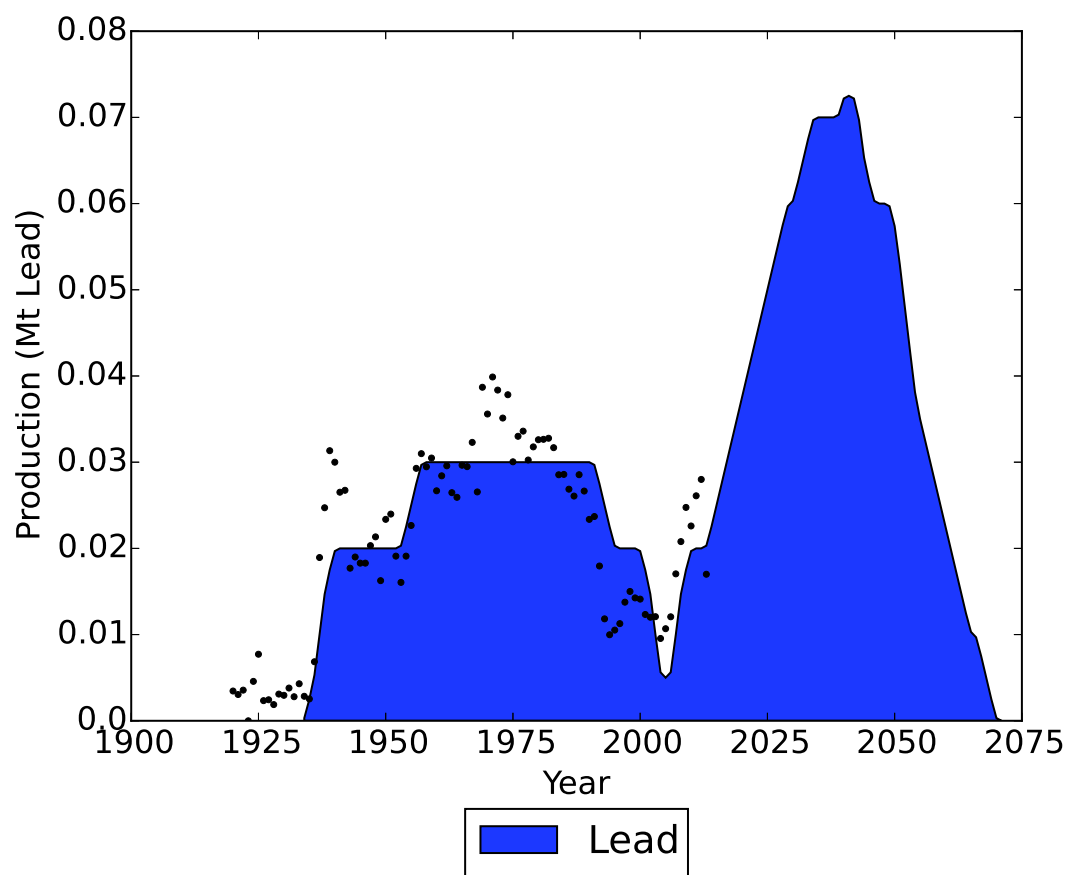

Figure 7.1: Argentina projections capped at 16



7.1.2 By Mineral

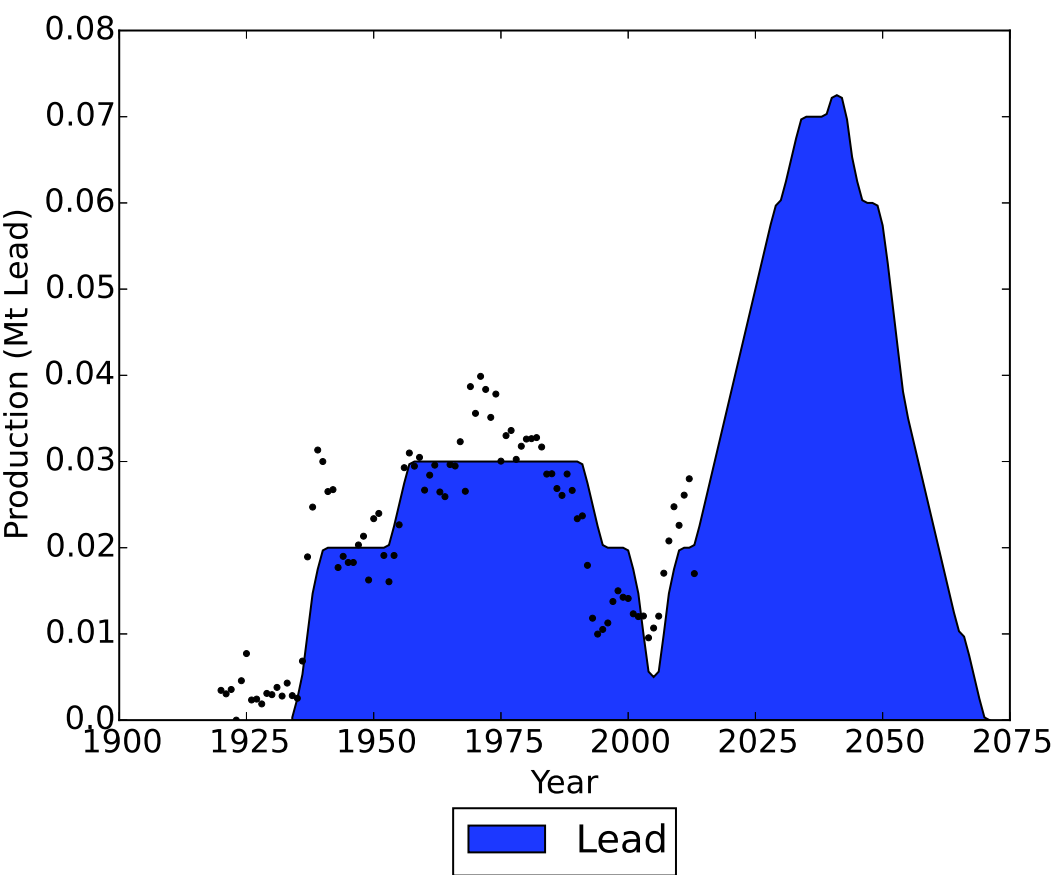

Figure 7.2: Argentina projection by mineral type

| Table 7.2: Peak years - Minerals |      |           |           |
|----------------------------------|------|-----------|-----------|
| Name                             | URR  | Peak Year | Peak Rate |
| Lead                             | 4.33 | 2041      | 0.07      |
| Total                            | 4.33 | 2041      | 0.07      |

## 7.2 Bolivia

### 7.2.1 All Projections

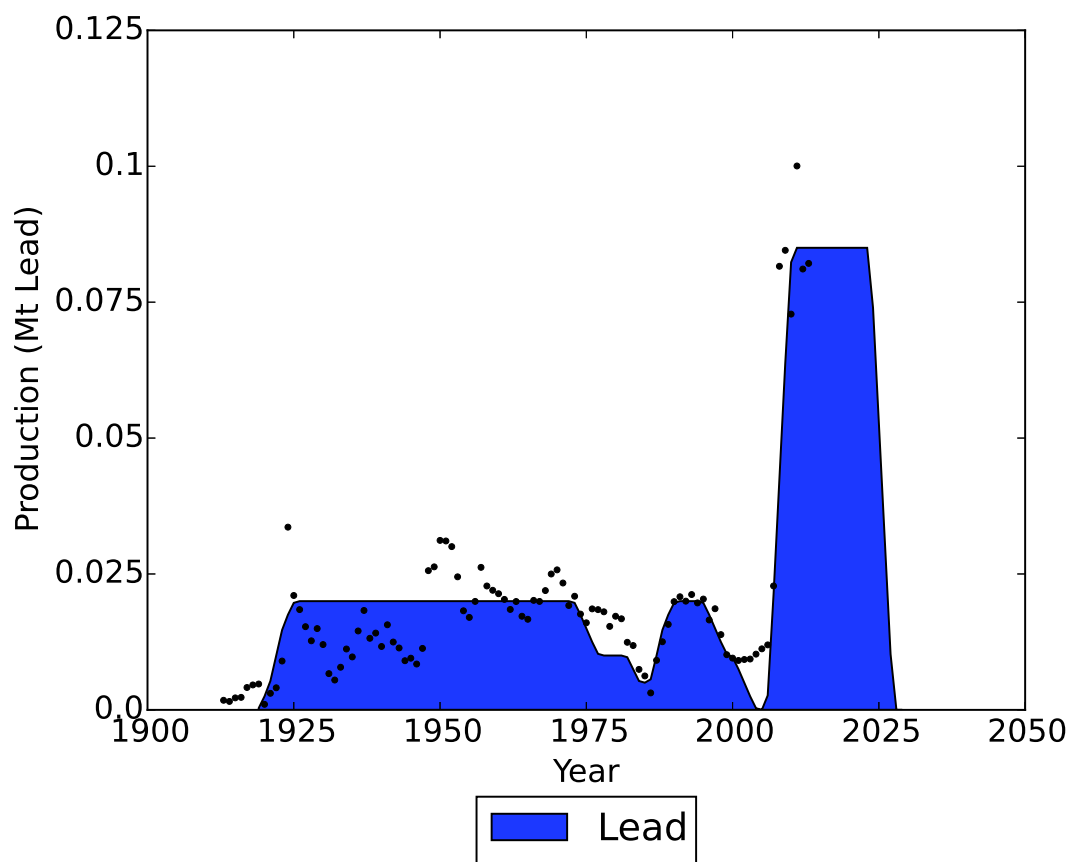

Figure 7.3: Bolivia projections capped at 16

| Table 7.3: Peak years - All |      |           |           |
|-----------------------------|------|-----------|-----------|
| Name                        | URR  | Peak Year | Peak Rate |
| Lead                        | 2.89 | 2011      | 0.09      |
| Total                       | 2.89 | 2011      | 0.09      |

7.2.2 By Mineral

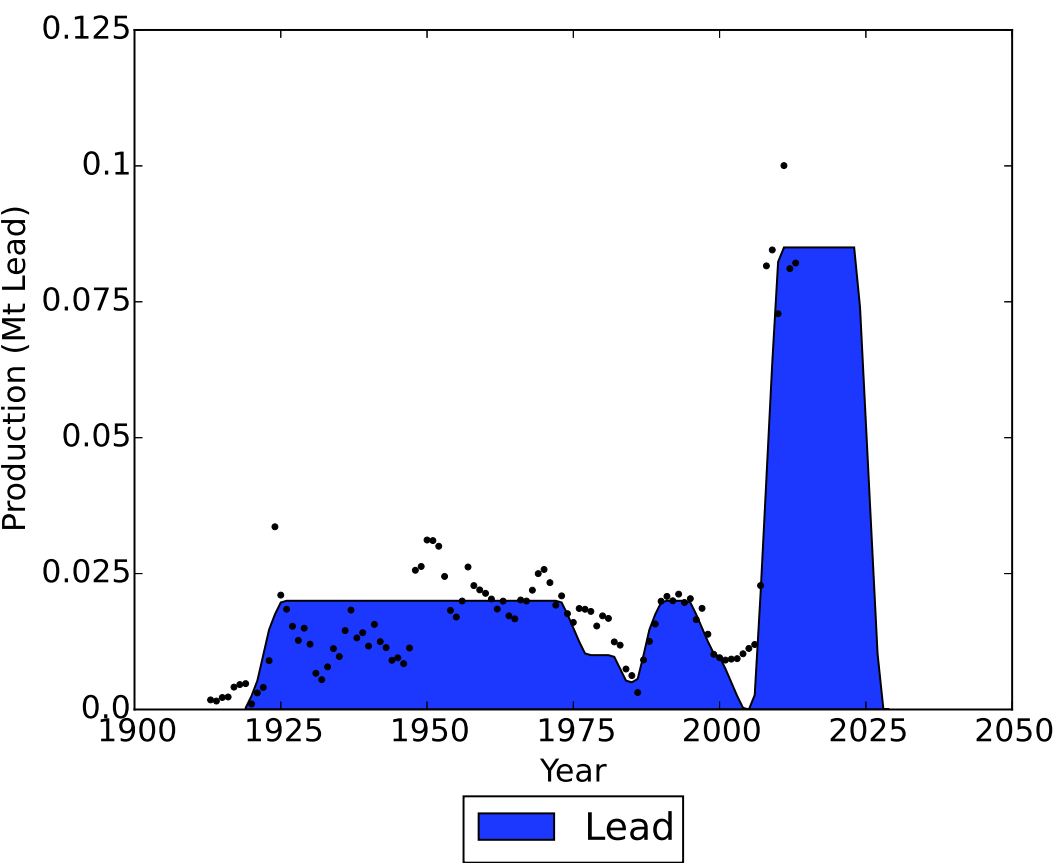

Figure 7.4: Bolivia projection by mineral type

| Table 7.4: Peak years - Minerals |      |           |           |
|----------------------------------|------|-----------|-----------|
| Name                             | URR  | Peak Year | Peak Rate |
| Lead                             | 2.89 | 2011      | 0.09      |
| Total                            | 2.89 | 2011      | 0.09      |

7.3 Brazil

7.3.1 All Projections

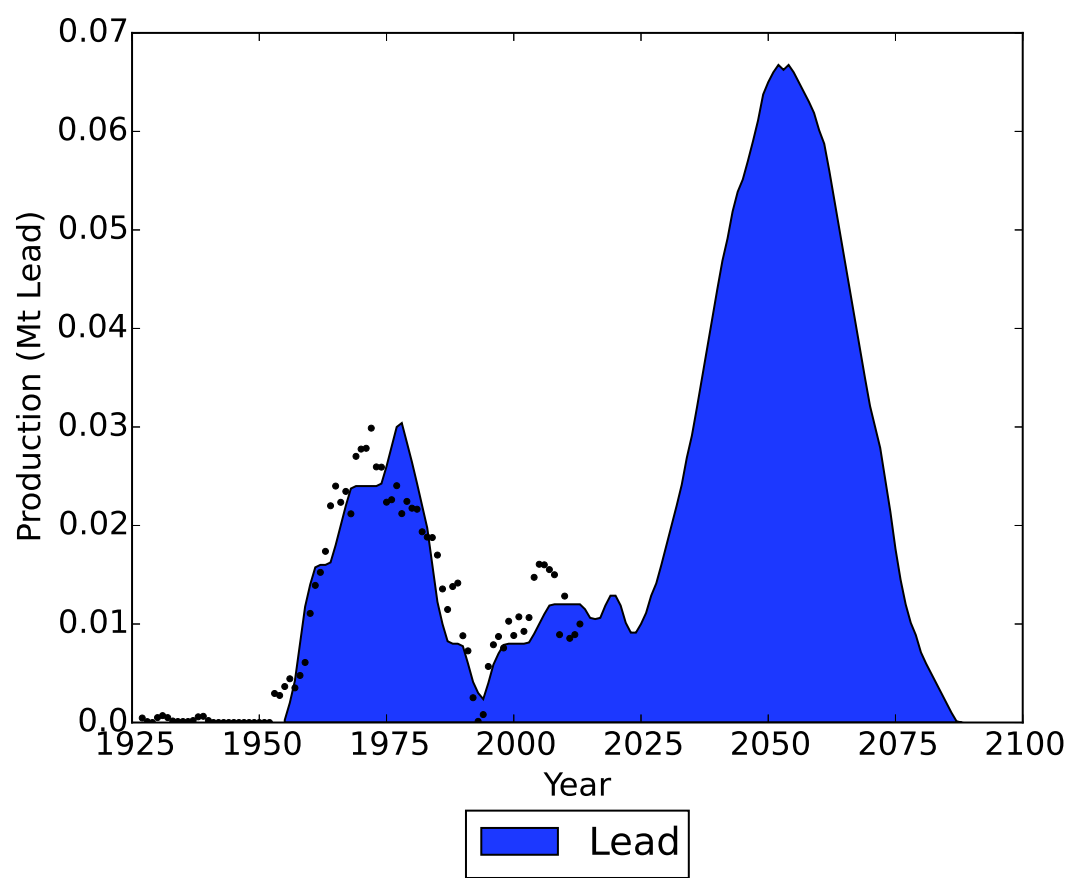

Figure 7.5: Brazil projections capped at 16

| Table 7.5: Peak years - All |      |           |           |
|-----------------------------|------|-----------|-----------|
| Name                        | URR  | Peak Year | Peak Rate |
| Lead                        | 3.21 | 2052      | 0.07      |
| Total                       | 3.21 | 2052      | 0.07      |

7.3.2 By Mineral

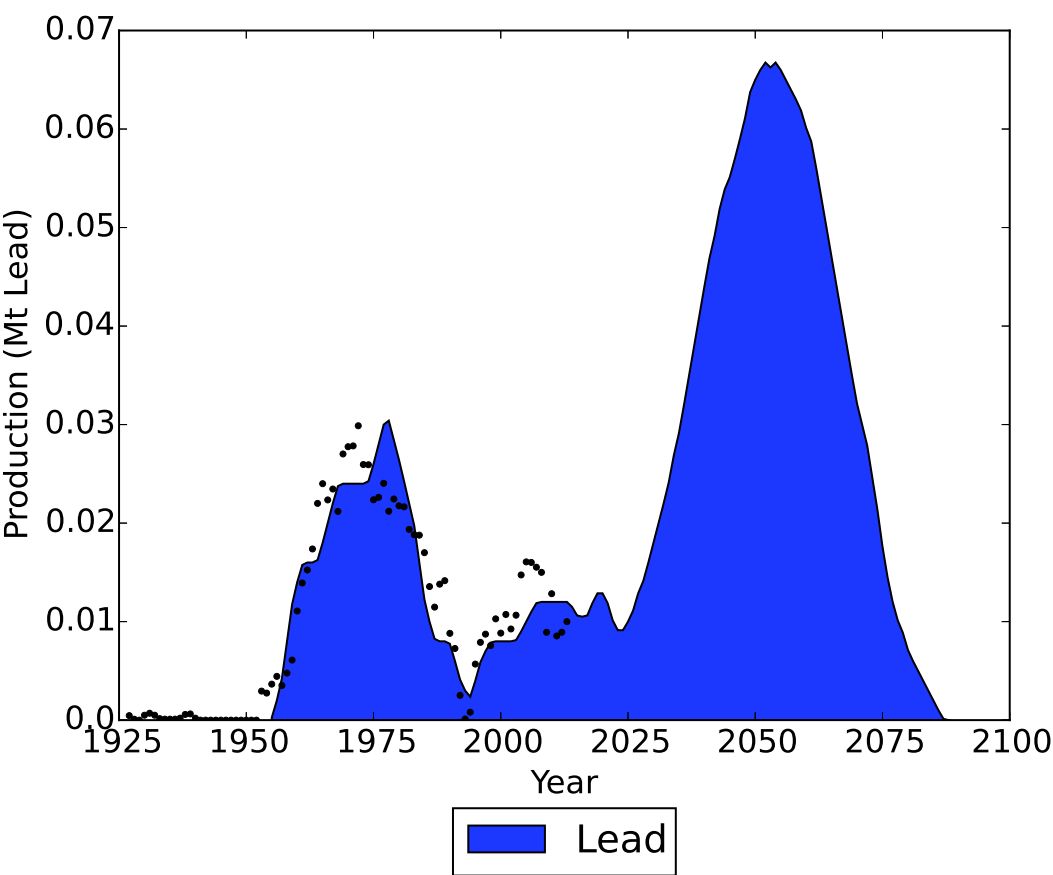

Figure 7.6: Brazil projection by mineral type

| Table 7.6: Peak years - Minerals |      |           |           |
|----------------------------------|------|-----------|-----------|
| Name                             | URR  | Peak Year | Peak Rate |
| Lead                             | 3.21 | 2052      | 0.07      |
| Total                            | 3.21 | 2052      | 0.07      |

7.4 Chile

7.4.1 All Projections

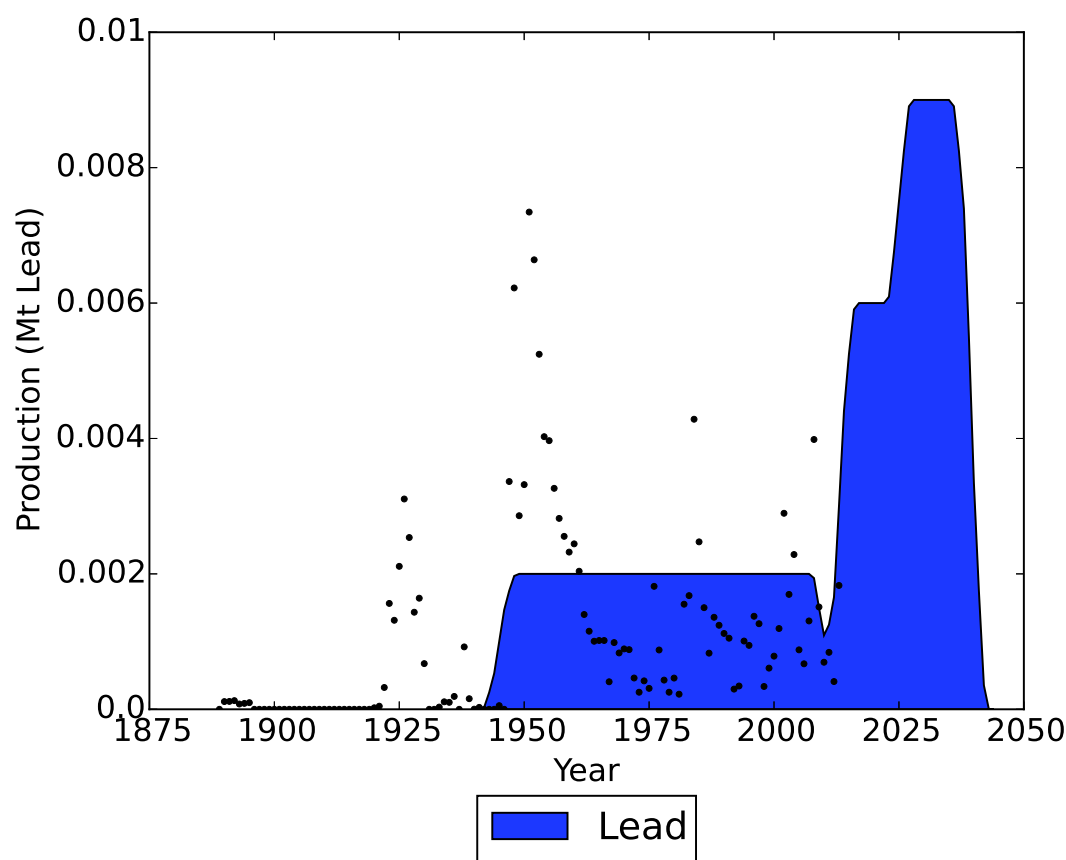

Table 7.7: Peak years - All

| Name         | URR         | Peak Year   | Peak Rate   |
|--------------|-------------|-------------|-------------|
| Lead         | 0.33        | 2028        | 0.01        |
| <b>Total</b> | <b>0.33</b> | <b>2028</b> | <b>0.01</b> |

7.4.2 By Mineral

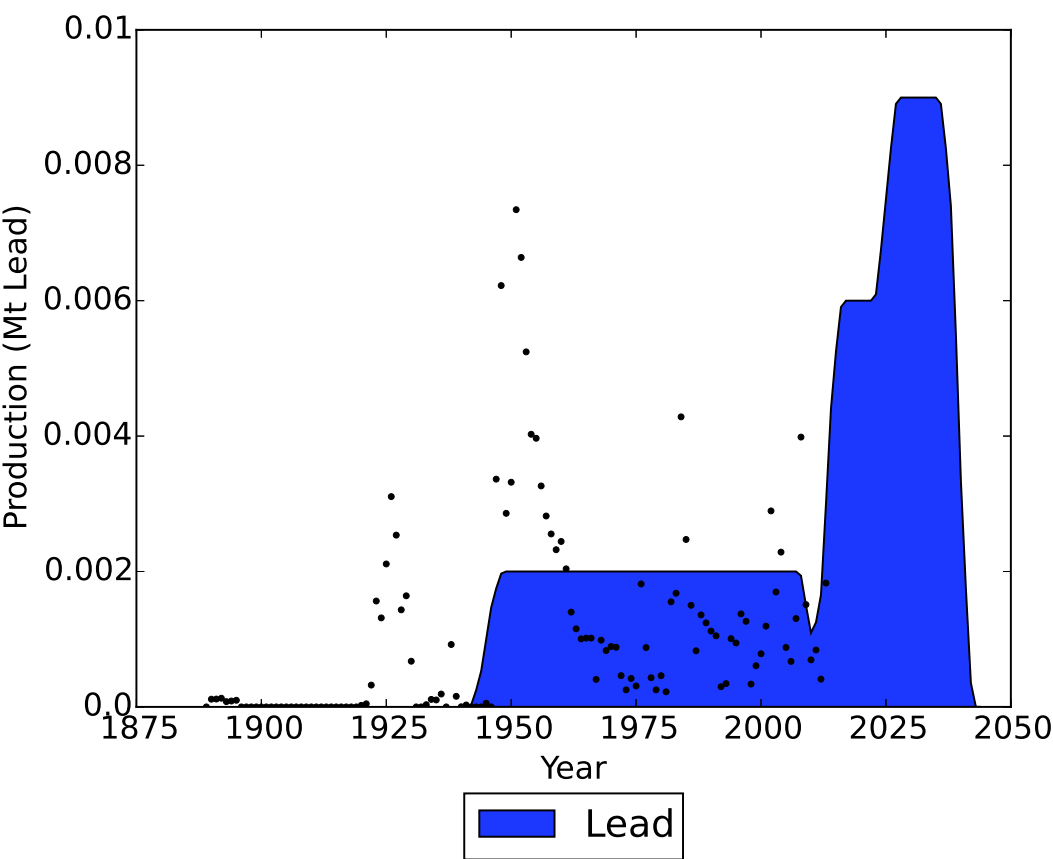

Figure 7.8: Chile projection by mineral type

| Table 7.8: Peak years - Minerals |      |           |           |
|----------------------------------|------|-----------|-----------|
| Name                             | URR  | Peak Year | Peak Rate |
| Lead                             | 0.33 | 2028      | 0.01      |
| Total                            | 0.33 | 2028      | 0.01      |

7.5 Colombia

7.5.1 All Projections

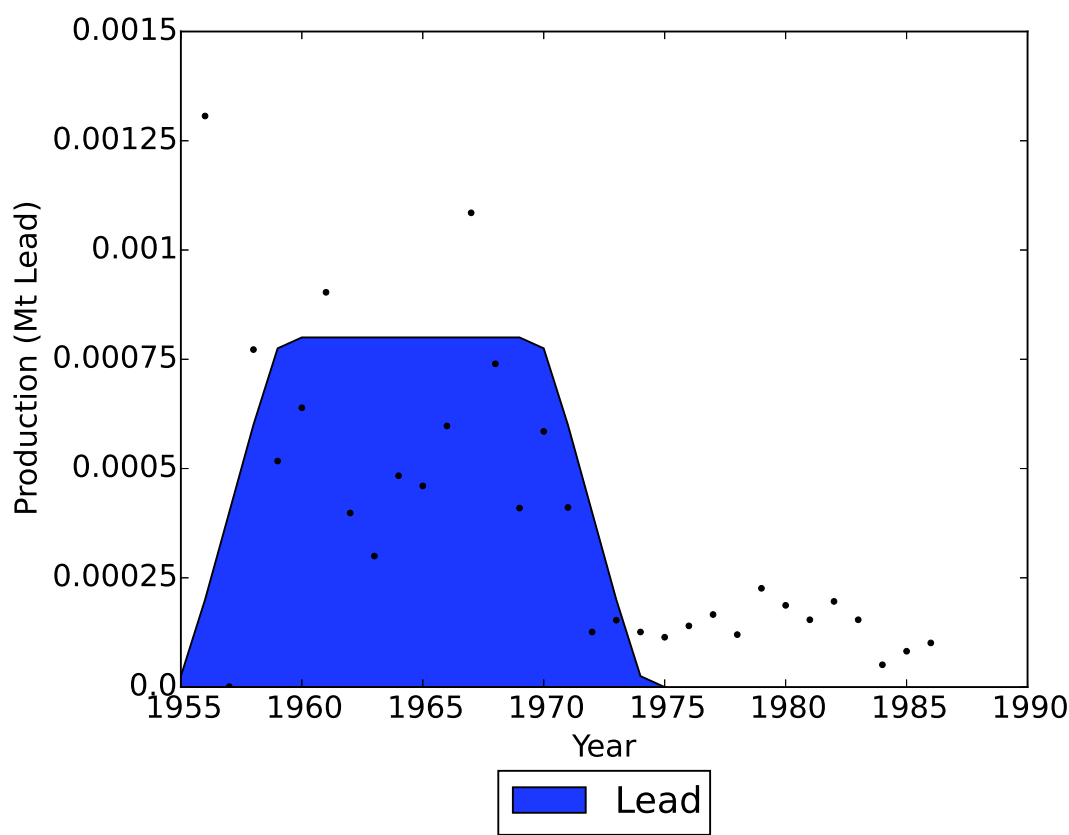

Figure 7.9: Colombia projections capped at 16

| Table 7.9: Peak years - All |      |           |           |
|-----------------------------|------|-----------|-----------|
| Name                        | URR  | Peak Year | Peak Rate |
| Lead                        | 0.01 | 1960      | —         |
| Total                       | 0.01 | 1960      | —         |



7.5.2 By Mineral

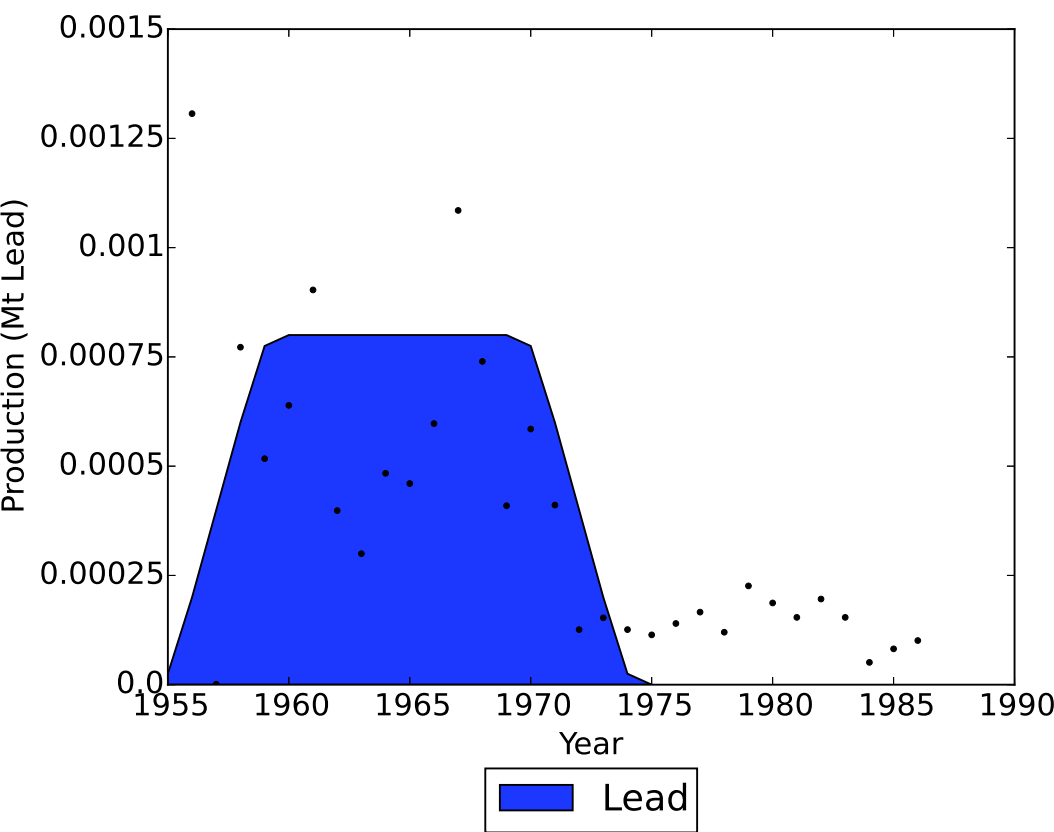

Figure 7.10: Colombia projection by mineral type

| Table 7.10: Peak years - Minerals |      |           |           |
|-----------------------------------|------|-----------|-----------|
| Name                              | URR  | Peak Year | Peak Rate |
| Lead                              | 0.01 | 1960      | —         |
| Total                             | 0.01 | 1960      | —         |

7.6 Ecuador

7.6.1 All Projections

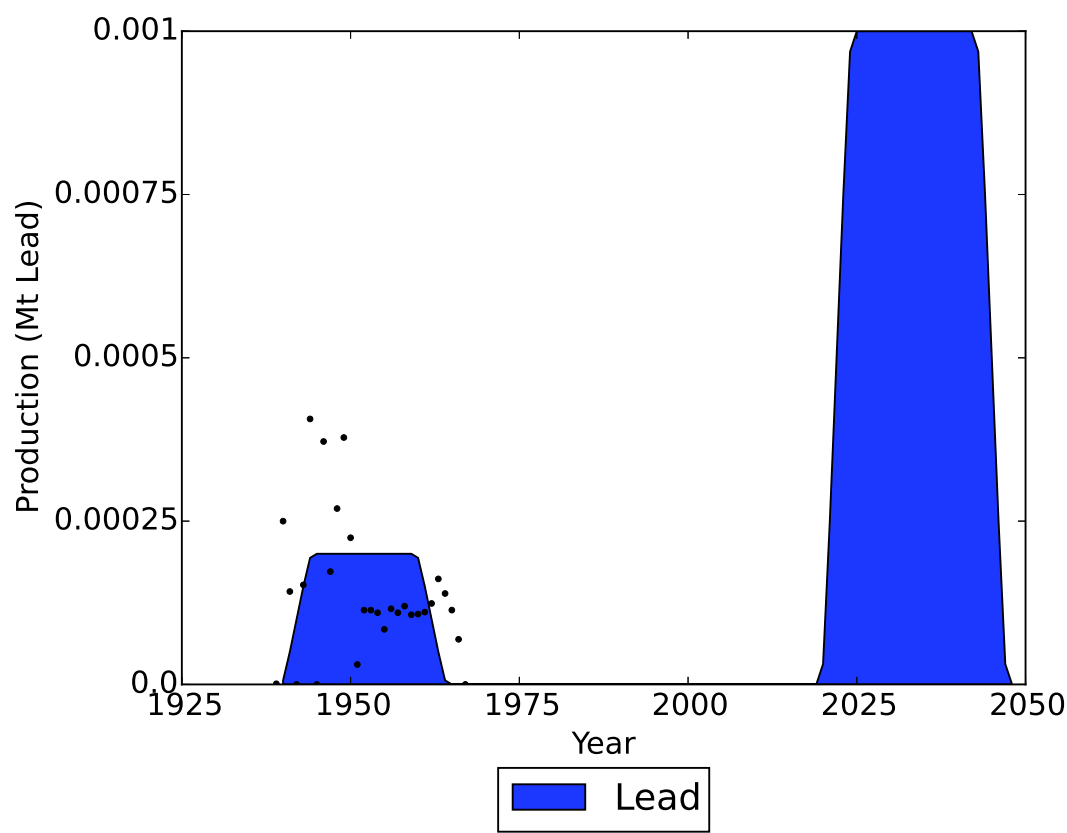

Figure 7.11: Ecuador projections capped at 16

| Table 7.11: Peak years - All |      |           |           |
|------------------------------|------|-----------|-----------|
| Name                         | URR  | Peak Year | Peak Rate |
| Lead                         | 0.03 | 2025      | —         |
| Total                        | 0.03 | 2025      | —         |

7.6.2 By Mineral

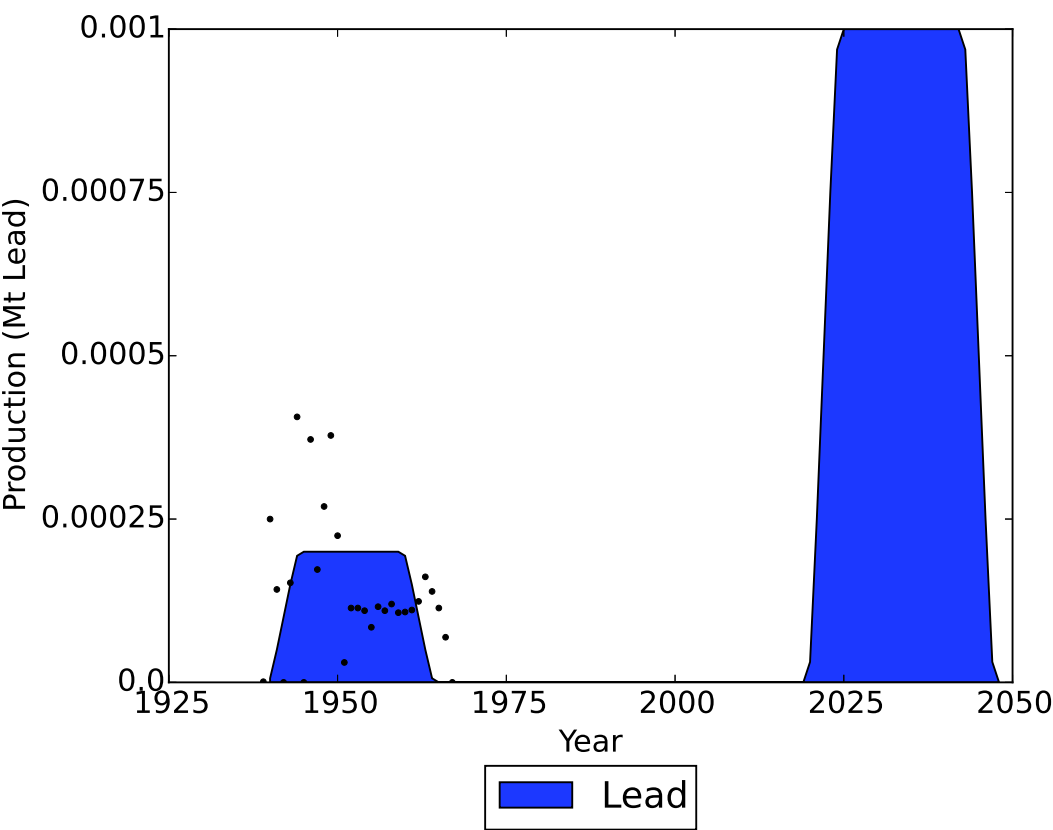

Figure 7.12: Ecuador projection by mineral type

| Table 7.12: Peak years - Minerals |             |             |           |
|-----------------------------------|-------------|-------------|-----------|
| Name                              | URR         | Peak Year   | Peak Rate |
| Lead                              | 0.03        | 2025        | —         |
| <b>Total</b>                      | <b>0.03</b> | <b>2025</b> | —         |

7.7 Peru

7.7.1 All Projections

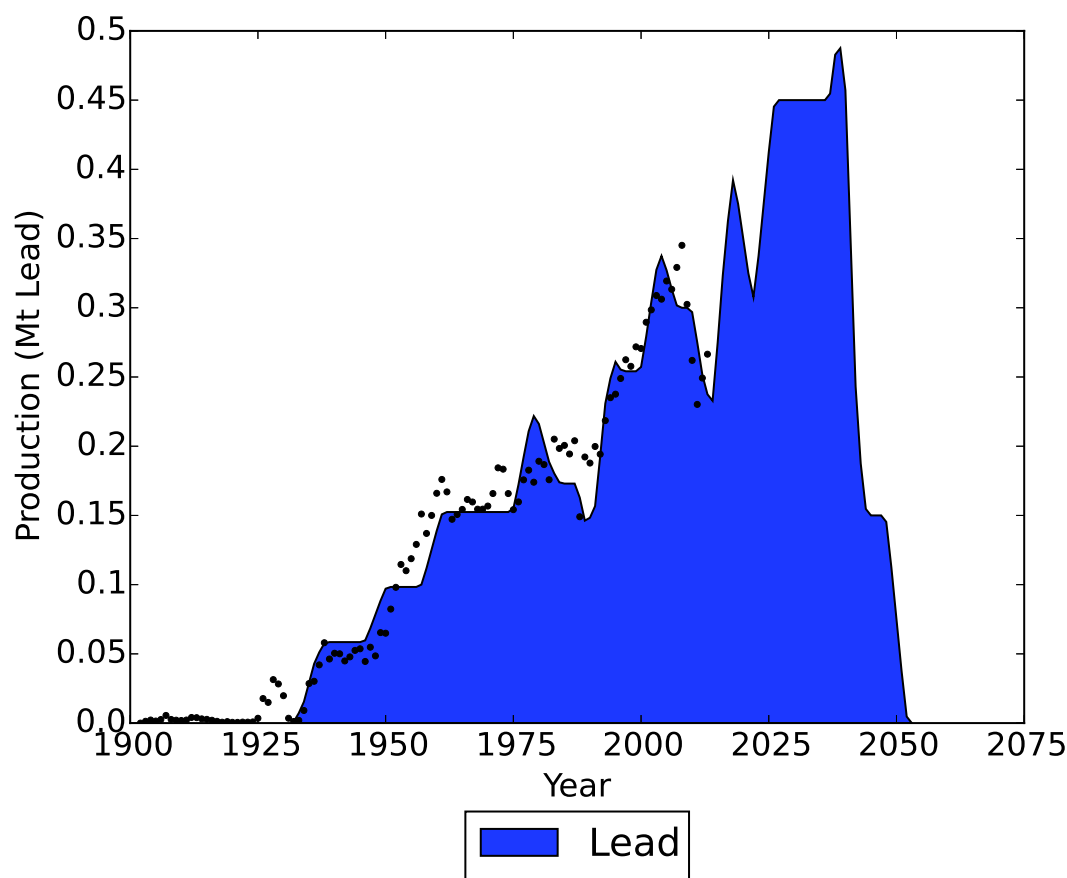

Figure 7.13: Peru projections capped at 16

Table 7.13: Peak years - All

| Name  | URR   | Peak Year | Peak Rate |
|-------|-------|-----------|-----------|
| Lead  | 25.97 | 2039      | 0.49      |
| Total | 25.97 | 2039      | 0.49      |

7.7.2 By Mineral

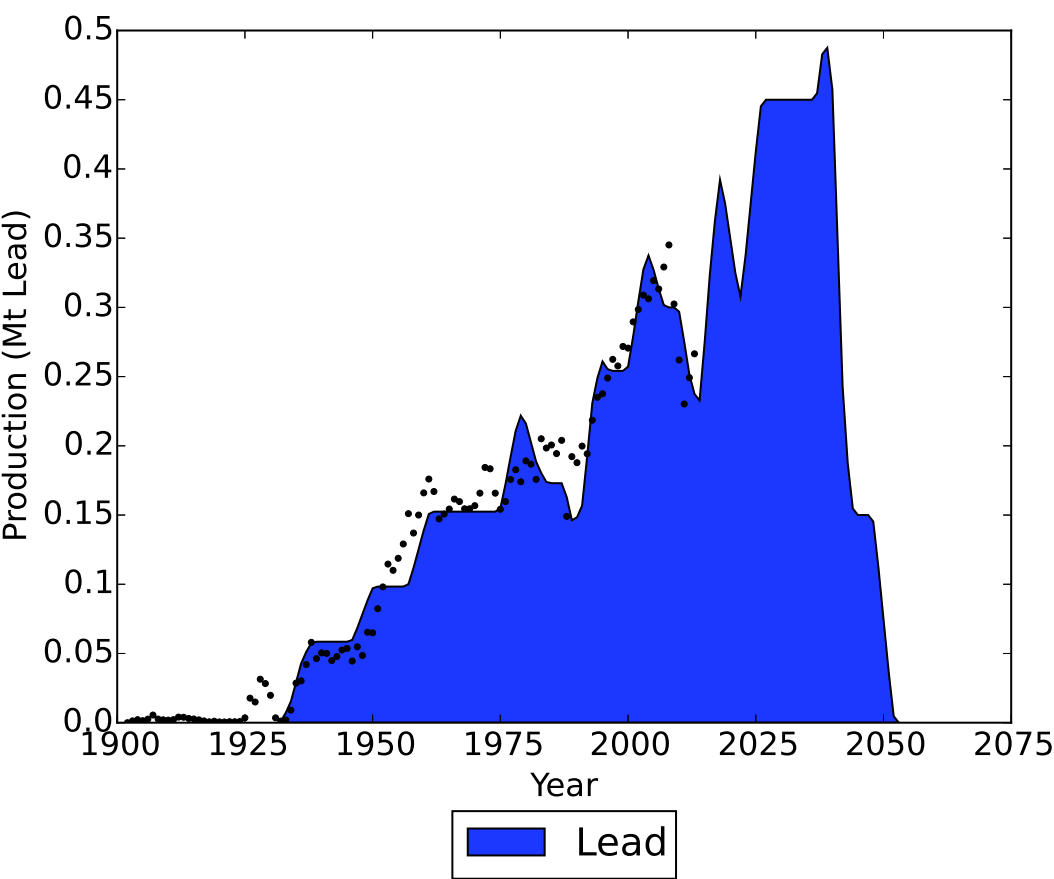

Figure 7.14: Peru projection by mineral type

| Table 7.14: Peak years - Minerals |       |           |           |
|-----------------------------------|-------|-----------|-----------|
| Name                              | URR   | Peak Year | Peak Rate |
| Lead                              | 25.97 | 2039      | 0.49      |
| Total                             | 25.97 | 2039      | 0.49      |

7.8 Uruguay

7.8.1 All Projections

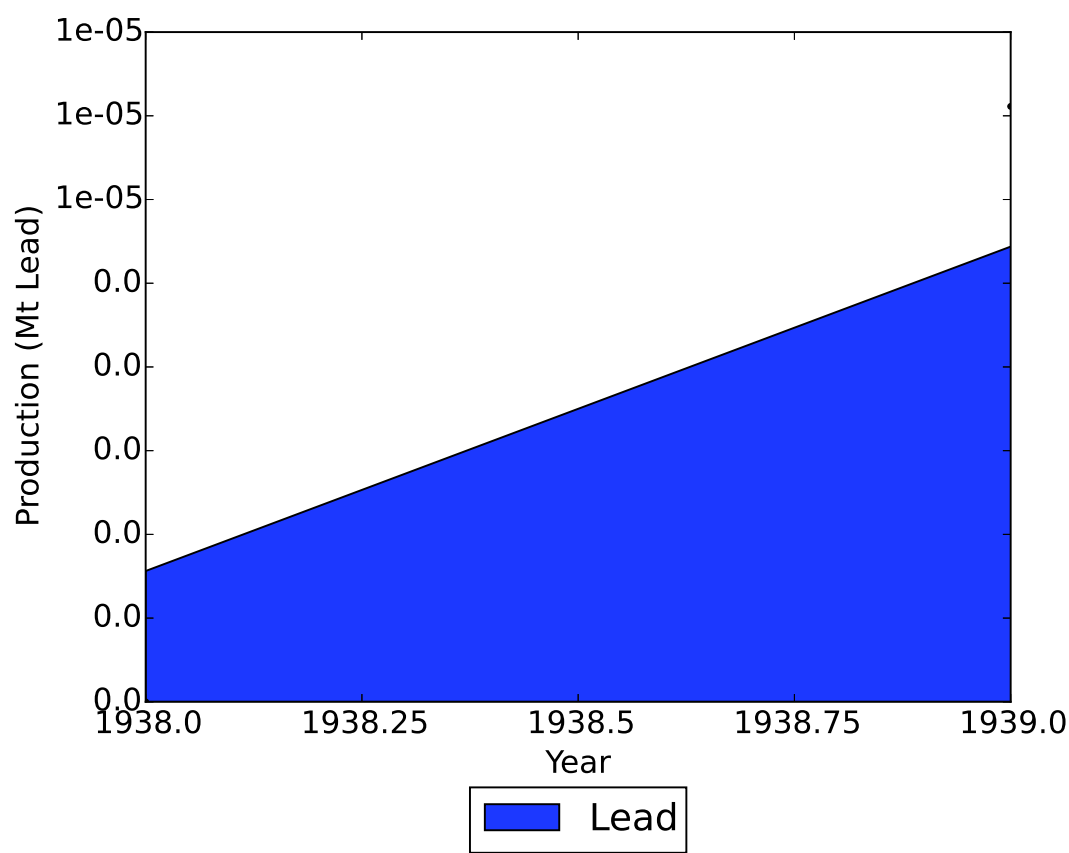

Figure 7.15: Uruguay projections capped at 16

| Table 7.15: Peak years - All |     |             |           |
|------------------------------|-----|-------------|-----------|
| Name                         | URR | Peak Year   | Peak Rate |
| Lead                         | –   | 1939        | –         |
| <b>Total</b>                 | –   | <b>1939</b> | –         |

7.8.2 By Mineral

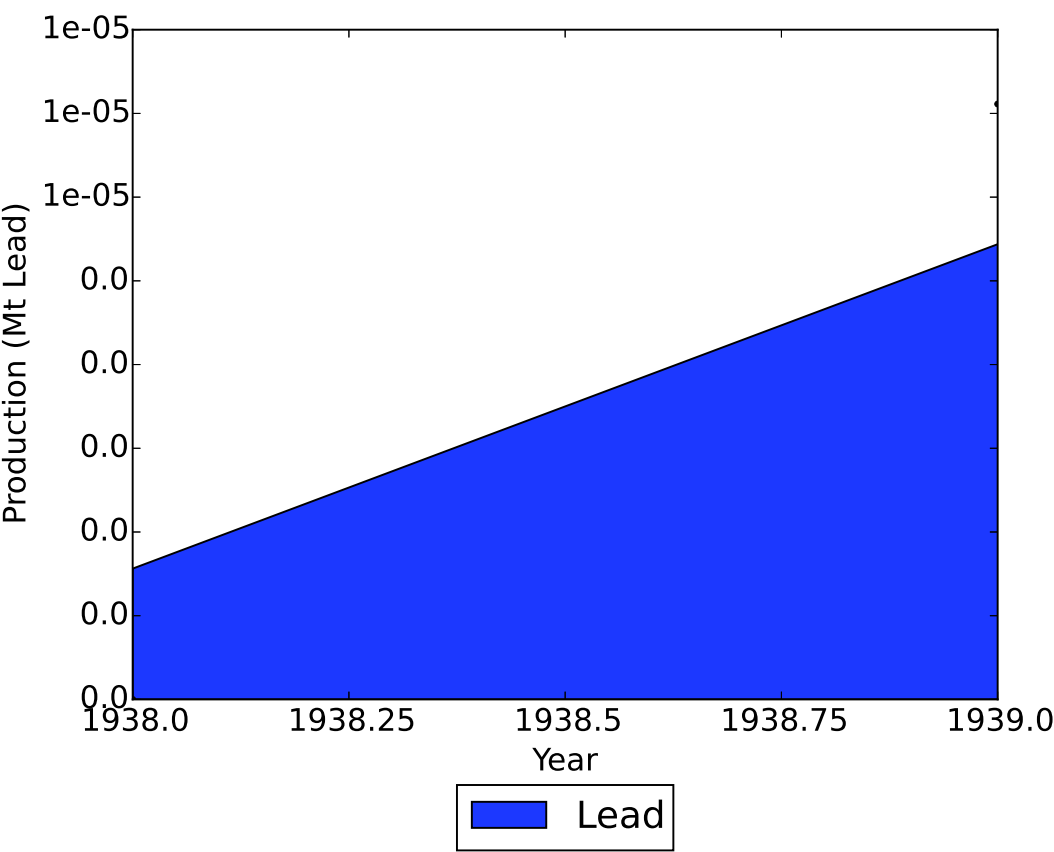

Figure 7.16: Uruguay projection by mineral type

| Table 7.16: Peak years - Minerals |     |           |           |
|-----------------------------------|-----|-----------|-----------|
| Name                              | URR | Peak Year | Peak Rate |
| Lead                              | –   | 1939      | –         |
| Total                             | –   | 1939      | –         |

7.9 Total

7.9.1 By country

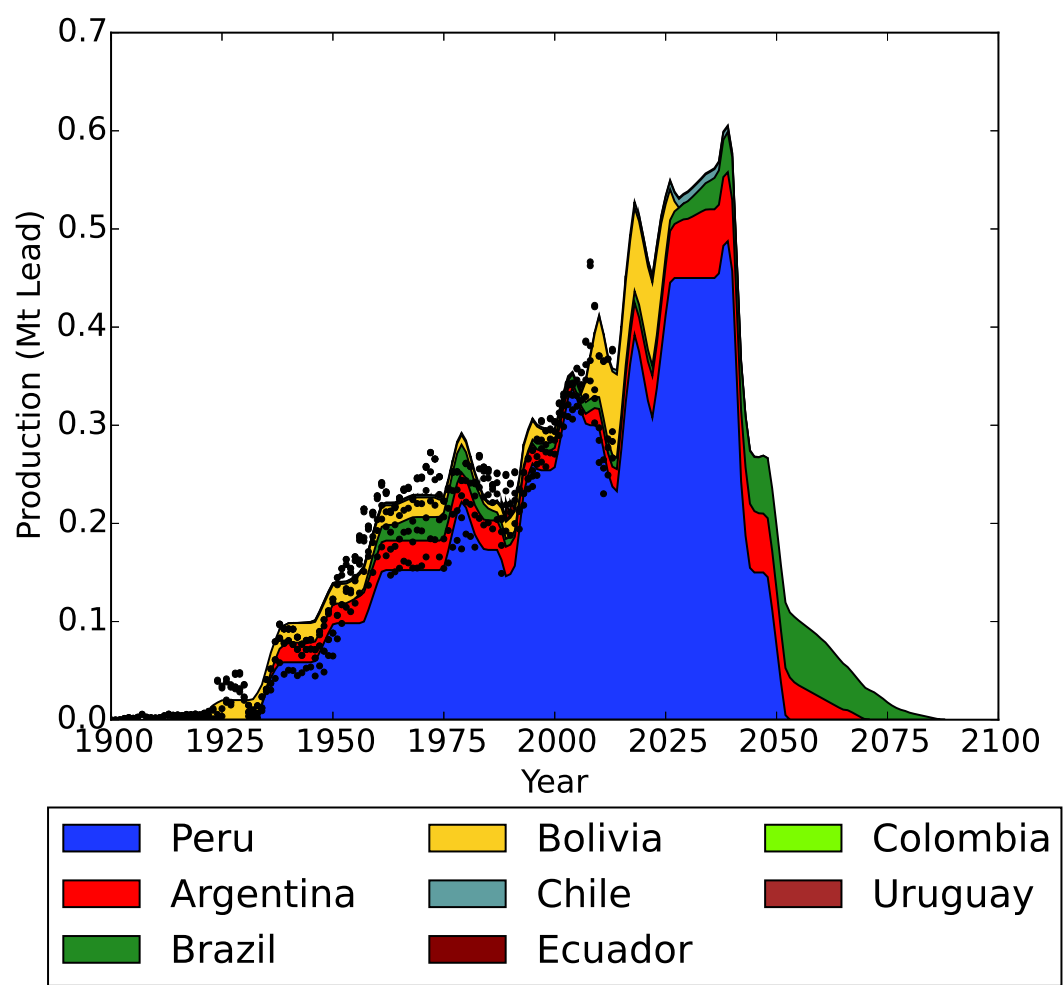

Figure 7.17: South America projections by country

7.9.2 By mineral



Table 7.17: Peak years - All

| Name         | URR          | Peak Year   | Peak Rate   |
|--------------|--------------|-------------|-------------|
| Peru         | 25.97        | 2039        | 0.49        |
| Argentina    | 4.33         | 2041        | 0.07        |
| Brazil       | 3.21         | 2052        | 0.07        |
| Bolivia      | 2.89         | 2011        | 0.09        |
| Chile        | 0.33         | 2028        | 0.01        |
| Ecuador      | 0.03         | 2025        | –           |
| Colombia     | 0.01         | 1960        | –           |
| Uruguay      | –            | 1939        | –           |
| <b>Total</b> | <b>36.76</b> | <b>2039</b> | <b>0.61</b> |

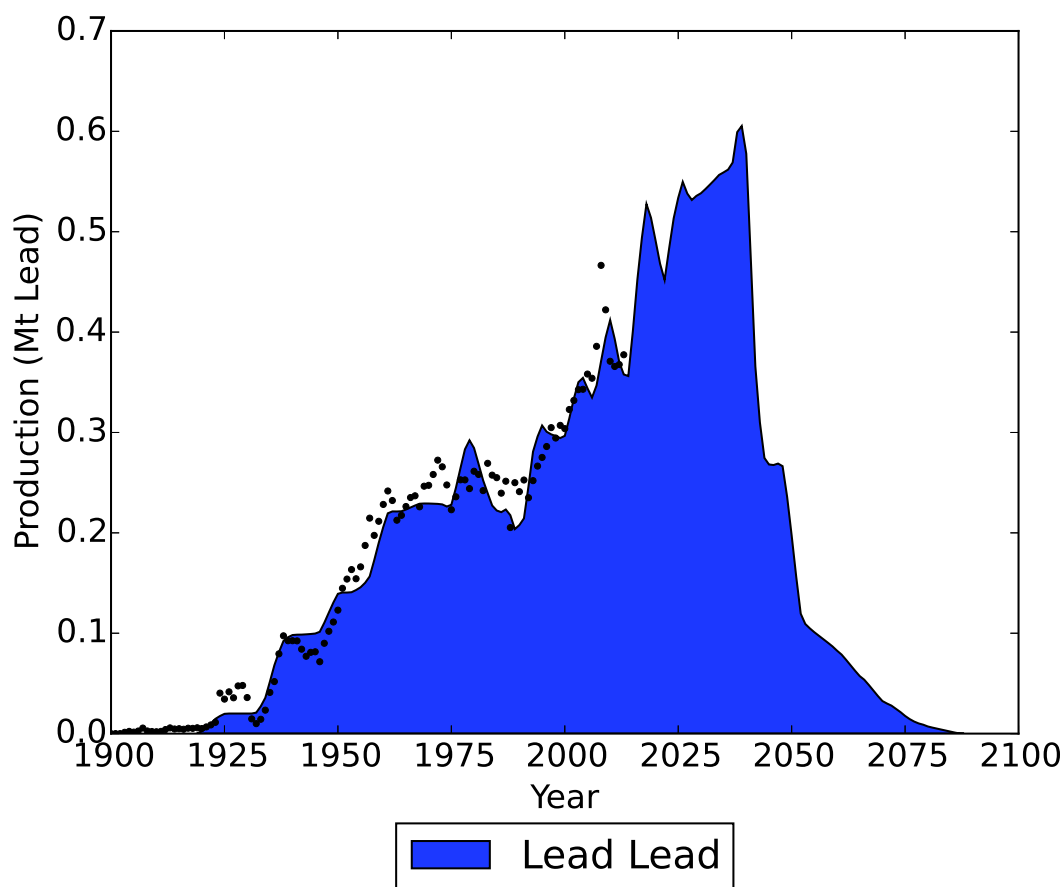

Figure 7.18: South America projection by mineral type

Table 7.18: Peak years - Minerals

| Name         | URR          | Peak Year   | Peak Rate   |
|--------------|--------------|-------------|-------------|
| Lead Lead    | 36.76        | 2039        | 0.61        |
| <b>Total</b> | <b>36.76</b> | <b>2039</b> | <b>0.61</b> |

## Chapter 8

### recycle

# Chapter 9

# Total

## 9.1 By continent

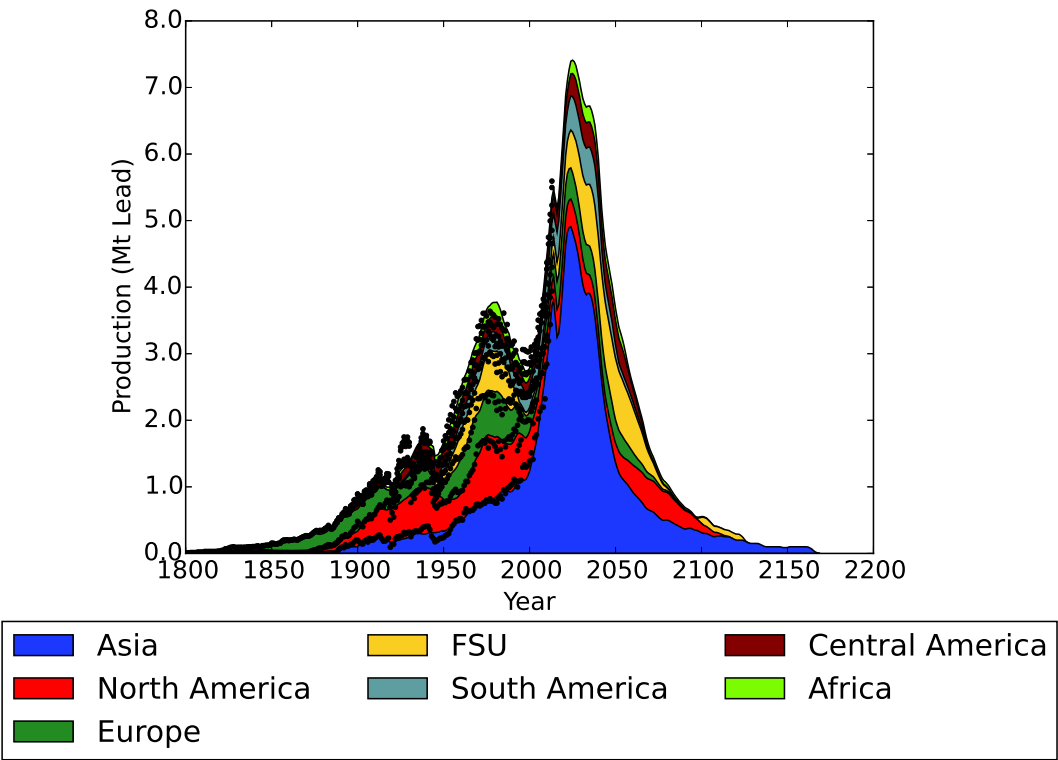

Figure 9.1: Total projections by continent

Table 9.1: Peak years - All

| <b>Name</b>     | <b>URR</b>    | <b>Peak Year</b> | <b>Peak Rate</b> |
|-----------------|---------------|------------------|------------------|
| Asia            | 254.23        | 2024             | 4.91             |
| North America   | 99.7          | 1976             | 0.96             |
| Europe          | 79.91         | 1980             | 0.68             |
| FSU             | 65.92         | 2041             | 0.98             |
| South America   | 36.76         | 2039             | 0.61             |
| Central America | 36.08         | 2032             | 0.38             |
| Africa          | 23.93         | 2037             | 0.24             |
| <b>Total</b>    | <b>596.54</b> | <b>2025</b>      | <b>7.41</b>      |

9.2 By mineral

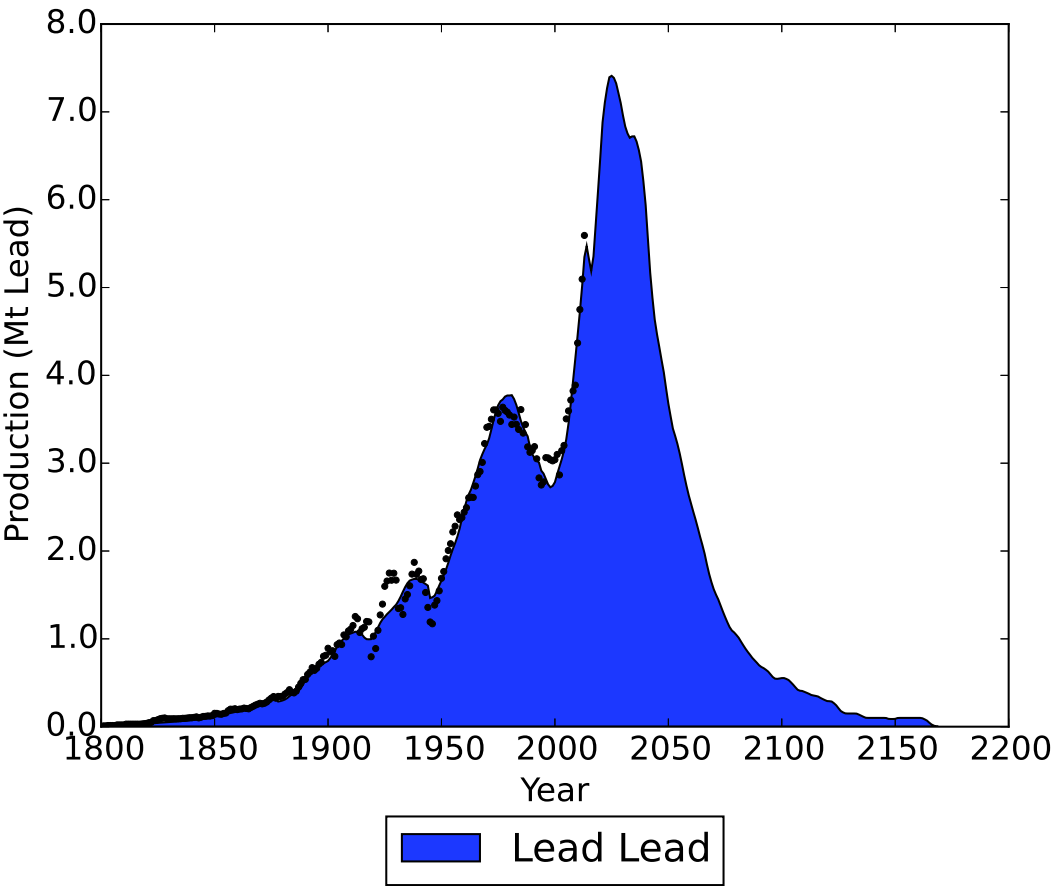

Figure 9.2: Total projection by mineral type

| Table 9.2: Peak year by mineral |        |           |           |
|---------------------------------|--------|-----------|-----------|
| Name                            | URR    | Peak Year | Peak Rate |
| Lead Lead                       | 596.54 | 2025      | 7.41      |
| Total                           | 596.54 | 2025      | 7.41      |

9.3 By Country

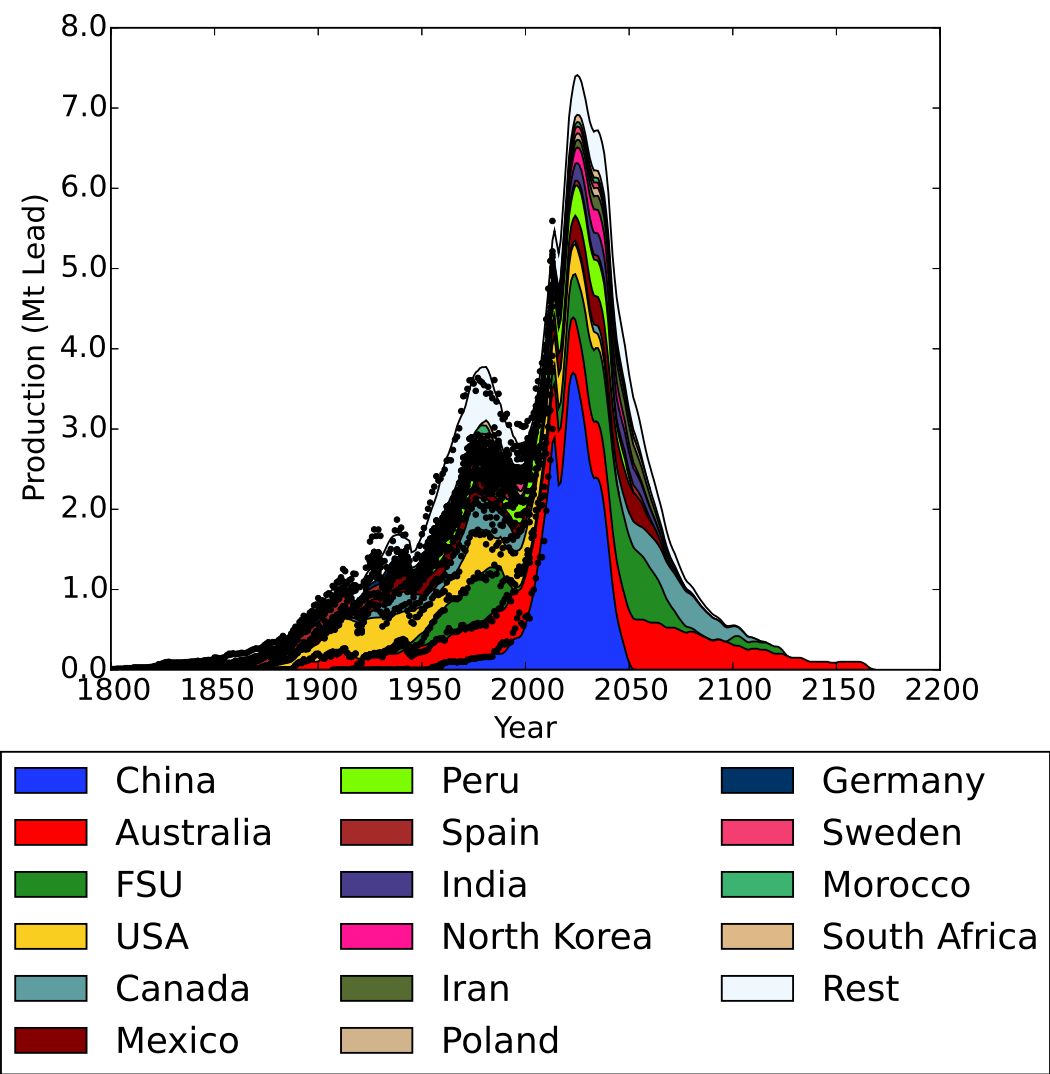

Figure 9.3: Total projection by country

Table 9.3: Peak year - Country

| <b>Name</b>    | <b>URR</b> | <b>Peak Year</b> | <b>Peak Rate</b> |
|----------------|------------|------------------|------------------|
| China          | 109.04     | 2023             | 3.7              |
| Australia      | 102.23     | 2028             | 0.7              |
| FSU            | 65.92      | 2041             | 0.98             |
| USA            | 57.51      | 1976             | 0.57             |
| Canada         | 42.19      | 2071             | 0.47             |
| Mexico         | 34.48      | 2048             | 0.36             |
| Peru           | 25.97      | 2039             | 0.49             |
| Spain          | 17.66      | 1909             | 0.2              |
| India          | 12.93      | 2038             | 0.29             |
| North Korea    | 11.18      | 2034             | 0.29             |
| Iran           | 9.87       | 2045             | 0.25             |
| Poland         | 8.23       | 2044             | 0.11             |
| Germany        | 8.07       | 1944             | 0.1              |
| Sweden         | 7.46       | 2018             | 0.1              |
| Morocco        | 6.69       | 1975             | 0.11             |
| South Africa   | 6.0        | 2048             | 0.09             |
| Yugoslavia     | 5.69       | 1969             | 0.12             |
| UK             | 5.52       | 1857             | 0.07             |
| Argentina      | 4.33       | 2041             | 0.07             |
| Namibia        | 4.19       | 1963             | 0.09             |
| Bulgaria       | 4.17       | 1969             | 0.1              |
| Ireland        | 3.91       | 1968             | 0.05             |
| Brazil         | 3.21       | 2052             | 0.07             |
| Italy          | 3.16       | 1952             | 0.05             |
| Burma          | 3.03       | 1933             | 0.1              |
| Bolivia        | 2.89       | 2011             | 0.09             |
| Algeria        | 2.84       | 2072             | 0.06             |
| Greece         | 2.79       | 2048             | 0.03             |
| Portugal       | 2.32       | 2058             | 0.05             |
| Japan          | 2.22       | 1975             | 0.07             |
| Macedonia      | 2.08       | 2010             | 0.04             |
| Romania        | 1.82       | 1978             | 0.04             |
| Tunisia        | 1.67       | 1915             | 0.02             |
| France         | 1.61       | 1967             | 0.03             |
| Turkey         | 1.56       | 2018             | 0.11             |
| Indonesia      | 1.51       | 2047             | 0.04             |
| Austria        | 1.21       | 1917             | 0.03             |
| Greenland      | 1.21       | 2048             | 0.03             |
| Nigeria        | 1.02       | 2039             | 0.02             |
| Zambia         | 1.01       | 1978             | 0.03             |
| Honduras       | 0.81       | 1977             | 0.02             |
| South Korea    | 0.66       | 1981             | 0.01             |
| Pakistan       | 0.64       | 2044             | 0.02             |
| Thailand       | 0.51       | 1989             | 0.03             |
| Serbia         | 0.45       | 2044             | 0.01             |
| Cuba           | 0.42       | 2055             | 0.01             |
| Guatemala      | 0.37       | 2017             | 0.01             |
| Czechoslovakia | 0.35       | 1967             | 0.01             |
| Chile          | 0.33       | 2028             | 0.01             |

Table 9.3: Peak year - Country – Continued

| <b>Name</b>            | <b>URR</b>    | <b>Peak Year</b> | <b>Peak Rate</b> |
|------------------------|---------------|------------------|------------------|
| Botswana               | 0.26          | 2050             | 0.01             |
| Yemen                  | 0.16          | 2026             | 0.01             |
| Norway                 | 0.14          | 1962             | –                |
| Congo                  | 0.14          | 1942             | –                |
| Montenegro             | 0.13          | 2023             | 0.01             |
| Finland                | 0.12          | 1960             | –                |
| Kosovo                 | 0.1           | 2012             | 0.01             |
| Bosnia and Herzegovina | 0.09          | 2018             | 0.01             |
| Hungary                | 0.08          | 1894             | –                |
| Nepal                  | 0.07          | 2025             | –                |
| Philippines            | 0.06          | 1976             | –                |
| Vietnam                | 0.05          | 2007             | 0.01             |
| Laos                   | 0.05          | 2024             | –                |
| Tanzania               | 0.04          | 1956             | 0.01             |
| Ecuador                | 0.03          | 2025             | –                |
| Burkina Faso           | 0.03          | 2030             | –                |
| Zaire                  | 0.02          | 1939             | –                |
| Egypt                  | 0.02          | 2030             | –                |
| Saudi Arabia           | 0.02          | 2027             | –                |
| Colombia               | 0.01          | 1960             | –                |
| New Caledonia          | 0.01          | 1891             | –                |
| Kenya                  | –             | 1990             | –                |
| Slovenia               | –             | 1994             | –                |
| Slovakia               | –             | 2013             | –                |
| Zimbabwe               | –             | 1932             | –                |
| Hong Kong              | –             | 1952             | –                |
| Uganda                 | –             | 1954             | –                |
| PNG                    | –             | 2025             | –                |
| Angola                 | –             | 1957             | –                |
| Malaysia               | –             | 1935             | –                |
| Uruguay                | –             | 1939             | –                |
| <b>Total</b>           | <b>596.54</b> | <b>2025</b>      | <b>7.41</b>      |
