# Supplementary material
Source: MDPI journal article supplement (https://www.mdpi.com/2079-9276/7/1/17)
Supplement: s1 [file s1]

# GeRS-DeMo Post Processor

Compilation ran on scenario: Zinc

Date: 10/2/2018

# Contents

|          |                           |           |
|----------|---------------------------|-----------|
| <b>1</b> | <b>Africa</b>             | <b>11</b> |
| 1.1      | Algeria . . . . .         | 11        |
| 1.1.1    | All Projections . . . . . | 11        |
| 1.1.2    | By Mineral . . . . .      | 13        |
| 1.2      | Angola . . . . .          | 14        |
| 1.2.1    | All Projections . . . . . | 14        |
| 1.2.2    | By Mineral . . . . .      | 15        |
| 1.3      | Botswana . . . . .        | 16        |
| 1.3.1    | All Projections . . . . . | 16        |
| 1.3.2    | By Mineral . . . . .      | 17        |
| 1.4      | Burkina Faso . . . . .    | 18        |
| 1.4.1    | All Projections . . . . . | 18        |
| 1.4.2    | By Mineral . . . . .      | 19        |
| 1.5      | Congo . . . . .           | 20        |
| 1.5.1    | All Projections . . . . . | 20        |
| 1.5.2    | By Mineral . . . . .      | 21        |
| 1.6      | Egypt . . . . .           | 22        |
| 1.6.1    | All Projections . . . . . | 22        |
| 1.6.2    | By Mineral . . . . .      | 23        |
| 1.7      | Eritrea . . . . .         | 24        |
| 1.7.1    | All Projections . . . . . | 24        |
| 1.7.2    | By Mineral . . . . .      | 25        |
| 1.8      | Kenya . . . . .           | 26        |
| 1.8.1    | All Projections . . . . . | 26        |
| 1.8.2    | By Mineral . . . . .      | 27        |
| 1.9      | Morocco . . . . .         | 28        |
| 1.9.1    | All Projections . . . . . | 28        |
| 1.9.2    | By Mineral . . . . .      | 29        |

|        |                           |    |
|--------|---------------------------|----|
| 1.10   | Namibia . . . . .         | 30 |
| 1.10.1 | All Projections . . . . . | 30 |
| 1.10.2 | By Mineral . . . . .      | 31 |
| 1.11   | Nigeria . . . . .         | 32 |
| 1.11.1 | All Projections . . . . . | 32 |
| 1.11.2 | By Mineral . . . . .      | 33 |
| 1.12   | South Africa . . . . .    | 34 |
| 1.12.1 | All Projections . . . . . | 34 |
| 1.12.2 | By Mineral . . . . .      | 35 |
| 1.13   | Sudan . . . . .           | 36 |
| 1.13.1 | All Projections . . . . . | 36 |
| 1.13.2 | By Mineral . . . . .      | 37 |
| 1.14   | Tanzania . . . . .        | 38 |
| 1.14.1 | All Projections . . . . . | 38 |
| 1.14.2 | By Mineral . . . . .      | 39 |
| 1.15   | Tunisia . . . . .         | 40 |
| 1.15.1 | All Projections . . . . . | 40 |
| 1.15.2 | By Mineral . . . . .      | 41 |
| 1.16   | Zaire . . . . .           | 42 |
| 1.16.1 | All Projections . . . . . | 42 |
| 1.16.2 | By Mineral . . . . .      | 43 |
| 1.17   | Zambia . . . . .          | 44 |
| 1.17.1 | All Projections . . . . . | 44 |
| 1.17.2 | By Mineral . . . . .      | 45 |
| 1.18   | Zimbabwe . . . . .        | 46 |
| 1.18.1 | All Projections . . . . . | 46 |
| 1.18.2 | By Mineral . . . . .      | 47 |
| 1.19   | Total . . . . .           | 48 |
| 1.19.1 | By country . . . . .      | 48 |
| 1.19.2 | By mineral . . . . .      | 48 |

## 2 Asia 51

|       |                           |    |
|-------|---------------------------|----|
| 2.1   | Australia . . . . .       | 51 |
| 2.1.1 | All Projections . . . . . | 51 |
| 2.1.2 | By Mineral . . . . .      | 53 |
| 2.2   | Burma . . . . .           | 54 |

|        |                           |    |
|--------|---------------------------|----|
| 2.2.1  | All Projections . . . . . | 54 |
| 2.2.2  | By Mineral . . . . .      | 55 |
| 2.3    | China . . . . .           | 56 |
| 2.3.1  | All Projections . . . . . | 56 |
| 2.3.2  | By Mineral . . . . .      | 57 |
| 2.4    | India . . . . .           | 58 |
| 2.4.1  | All Projections . . . . . | 58 |
| 2.4.2  | By Mineral . . . . .      | 59 |
| 2.5    | Indonesia . . . . .       | 60 |
| 2.5.1  | All Projections . . . . . | 60 |
| 2.5.2  | By Mineral . . . . .      | 61 |
| 2.6    | Iran . . . . .            | 62 |
| 2.6.1  | All Projections . . . . . | 62 |
| 2.6.2  | By Mineral . . . . .      | 63 |
| 2.7    | Japan . . . . .           | 64 |
| 2.7.1  | All Projections . . . . . | 64 |
| 2.7.2  | By Mineral . . . . .      | 65 |
| 2.8    | Laos . . . . .            | 66 |
| 2.8.1  | All Projections . . . . . | 66 |
| 2.8.2  | By Mineral . . . . .      | 67 |
| 2.9    | Mongolia . . . . .        | 68 |
| 2.9.1  | All Projections . . . . . | 68 |
| 2.9.2  | By Mineral . . . . .      | 69 |
| 2.10   | Nepal . . . . .           | 70 |
| 2.10.1 | All Projections . . . . . | 70 |
| 2.10.2 | By Mineral . . . . .      | 71 |
| 2.11   | New Caledonia . . . . .   | 72 |
| 2.11.1 | All Projections . . . . . | 72 |
| 2.11.2 | By Mineral . . . . .      | 73 |
| 2.12   | North Korea . . . . .     | 74 |
| 2.12.1 | All Projections . . . . . | 74 |
| 2.12.2 | By Mineral . . . . .      | 75 |
| 2.13   | PNG . . . . .             | 76 |
| 2.13.1 | All Projections . . . . . | 76 |
| 2.13.2 | By Mineral . . . . .      | 77 |
| 2.14   | Pakistan . . . . .        | 78 |

|        |                           |    |
|--------|---------------------------|----|
| 2.14.1 | All Projections . . . . . | 78 |
| 2.14.2 | By Mineral . . . . .      | 79 |
| 2.15   | Philippines . . . . .     | 80 |
| 2.15.1 | All Projections . . . . . | 80 |
| 2.15.2 | By Mineral . . . . .      | 81 |
| 2.16   | Saudi Arabia . . . . .    | 82 |
| 2.16.1 | All Projections . . . . . | 82 |
| 2.16.2 | By Mineral . . . . .      | 83 |
| 2.17   | South Korea . . . . .     | 84 |
| 2.17.1 | All Projections . . . . . | 84 |
| 2.17.2 | By Mineral . . . . .      | 85 |
| 2.18   | Thailand . . . . .        | 86 |
| 2.18.1 | All Projections . . . . . | 86 |
| 2.18.2 | By Mineral . . . . .      | 87 |
| 2.19   | Vietnam . . . . .         | 88 |
| 2.19.1 | All Projections . . . . . | 88 |
| 2.19.2 | By Mineral . . . . .      | 89 |
| 2.20   | Yemen . . . . .           | 90 |
| 2.20.1 | All Projections . . . . . | 90 |
| 2.20.2 | By Mineral . . . . .      | 91 |
| 2.21   | Total . . . . .           | 92 |
| 2.21.1 | By country . . . . .      | 92 |
| 2.21.2 | By mineral . . . . .      | 92 |

### **3 Central America 95**

|       |                              |     |
|-------|------------------------------|-----|
| 3.1   | Cuba . . . . .               | 95  |
| 3.1.1 | All Projections . . . . .    | 95  |
| 3.1.2 | By Mineral . . . . .         | 97  |
| 3.2   | Dominican Republic . . . . . | 98  |
| 3.2.1 | All Projections . . . . .    | 98  |
| 3.2.2 | By Mineral . . . . .         | 99  |
| 3.3   | El Salvador . . . . .        | 100 |
| 3.3.1 | All Projections . . . . .    | 100 |
| 3.3.2 | By Mineral . . . . .         | 101 |
| 3.4   | Guatemala . . . . .          | 102 |
| 3.4.1 | All Projections . . . . .    | 102 |

|       |                           |     |
|-------|---------------------------|-----|
| 3.4.2 | By Mineral . . . . .      | 103 |
| 3.5   | Honduras . . . . .        | 104 |
| 3.5.1 | All Projections . . . . . | 104 |
| 3.5.2 | By Mineral . . . . .      | 105 |
| 3.6   | Mexico . . . . .          | 106 |
| 3.6.1 | All Projections . . . . . | 106 |
| 3.6.2 | By Mineral . . . . .      | 107 |
| 3.7   | Nicaragua . . . . .       | 108 |
| 3.7.1 | All Projections . . . . . | 108 |
| 3.7.2 | By Mineral . . . . .      | 109 |
| 3.8   | Total . . . . .           | 110 |
| 3.8.1 | By country . . . . .      | 110 |
| 3.8.2 | By mineral . . . . .      | 110 |

## 4 Europe 112

|       |                                  |     |
|-------|----------------------------------|-----|
| 4.1   | Austria . . . . .                | 112 |
| 4.1.1 | All Projections . . . . .        | 112 |
| 4.1.2 | By Mineral . . . . .             | 114 |
| 4.2   | Belgium . . . . .                | 115 |
| 4.2.1 | All Projections . . . . .        | 115 |
| 4.2.2 | By Mineral . . . . .             | 116 |
| 4.3   | Bosnia and Herzegovina . . . . . | 117 |
| 4.3.1 | All Projections . . . . .        | 117 |
| 4.3.2 | By Mineral . . . . .             | 118 |
| 4.4   | Bulgaria . . . . .               | 119 |
| 4.4.1 | All Projections . . . . .        | 119 |
| 4.4.2 | By Mineral . . . . .             | 120 |
| 4.5   | Czechoslovakia . . . . .         | 121 |
| 4.5.1 | All Projections . . . . .        | 121 |
| 4.5.2 | By Mineral . . . . .             | 122 |
| 4.6   | Finland . . . . .                | 123 |
| 4.6.1 | All Projections . . . . .        | 123 |
| 4.6.2 | By Mineral . . . . .             | 124 |
| 4.7   | France . . . . .                 | 125 |
| 4.7.1 | All Projections . . . . .        | 125 |
| 4.7.2 | By Mineral . . . . .             | 126 |

|        |                           |     |
|--------|---------------------------|-----|
| 4.8    | Germany . . . . .         | 127 |
| 4.8.1  | All Projections . . . . . | 127 |
| 4.8.2  | By Mineral . . . . .      | 128 |
| 4.9    | Greece . . . . .          | 129 |
| 4.9.1  | All Projections . . . . . | 129 |
| 4.9.2  | By Mineral . . . . .      | 130 |
| 4.10   | Greenland . . . . .       | 131 |
| 4.10.1 | All Projections . . . . . | 131 |
| 4.10.2 | By Mineral . . . . .      | 132 |
| 4.11   | Hungary . . . . .         | 133 |
| 4.11.1 | All Projections . . . . . | 133 |
| 4.11.2 | By Mineral . . . . .      | 134 |
| 4.12   | Ireland . . . . .         | 135 |
| 4.12.1 | All Projections . . . . . | 135 |
| 4.12.2 | By Mineral . . . . .      | 136 |
| 4.13   | Italy . . . . .           | 137 |
| 4.13.1 | All Projections . . . . . | 137 |
| 4.13.2 | By Mineral . . . . .      | 138 |
| 4.14   | Kosovo . . . . .          | 139 |
| 4.14.1 | All Projections . . . . . | 139 |
| 4.14.2 | By Mineral . . . . .      | 140 |
| 4.15   | Macedonia . . . . .       | 141 |
| 4.15.1 | All Projections . . . . . | 141 |
| 4.15.2 | By Mineral . . . . .      | 142 |
| 4.16   | Montenegro . . . . .      | 143 |
| 4.16.1 | All Projections . . . . . | 143 |
| 4.16.2 | By Mineral . . . . .      | 144 |
| 4.17   | Norway . . . . .          | 145 |
| 4.17.1 | All Projections . . . . . | 145 |
| 4.17.2 | By Mineral . . . . .      | 146 |
| 4.18   | Poland . . . . .          | 147 |
| 4.18.1 | All Projections . . . . . | 147 |
| 4.18.2 | By Mineral . . . . .      | 148 |
| 4.19   | Portugal . . . . .        | 149 |
| 4.19.1 | All Projections . . . . . | 149 |
| 4.19.2 | By Mineral . . . . .      | 150 |

|        |                           |     |
|--------|---------------------------|-----|
| 4.20   | Romania . . . . .         | 151 |
| 4.20.1 | All Projections . . . . . | 151 |
| 4.20.2 | By Mineral . . . . .      | 152 |
| 4.21   | Serbia . . . . .          | 153 |
| 4.21.1 | All Projections . . . . . | 153 |
| 4.21.2 | By Mineral . . . . .      | 154 |
| 4.22   | Slovakia . . . . .        | 155 |
| 4.22.1 | All Projections . . . . . | 155 |
| 4.22.2 | By Mineral . . . . .      | 156 |
| 4.23   | Slovenia . . . . .        | 157 |
| 4.23.1 | All Projections . . . . . | 157 |
| 4.23.2 | By Mineral . . . . .      | 158 |
| 4.24   | Spain . . . . .           | 159 |
| 4.24.1 | All Projections . . . . . | 159 |
| 4.24.2 | By Mineral . . . . .      | 160 |
| 4.25   | Sweden . . . . .          | 161 |
| 4.25.1 | All Projections . . . . . | 161 |
| 4.25.2 | By Mineral . . . . .      | 162 |
| 4.26   | Turkey . . . . .          | 163 |
| 4.26.1 | All Projections . . . . . | 163 |
| 4.26.2 | By Mineral . . . . .      | 164 |
| 4.27   | UK . . . . .              | 165 |
| 4.27.1 | All Projections . . . . . | 165 |
| 4.27.2 | By Mineral . . . . .      | 166 |
| 4.28   | Yugoslavia . . . . .      | 167 |
| 4.28.1 | All Projections . . . . . | 167 |
| 4.28.2 | By Mineral . . . . .      | 168 |
| 4.29   | Total . . . . .           | 169 |
| 4.29.1 | By country . . . . .      | 169 |
| 4.29.2 | By mineral . . . . .      | 171 |

## **5 FSU 172**

|       |                           |     |
|-------|---------------------------|-----|
| 5.1   | FSU . . . . .             | 172 |
| 5.1.1 | All Projections . . . . . | 172 |
| 5.1.2 | By Mineral . . . . .      | 174 |
| 5.2   | Total . . . . .           | 175 |



|       |            |     |
|-------|------------|-----|
| 5.2.1 | By country | 175 |
| 5.2.2 | By mineral | 176 |

## 6 North America 177

|       |                 |     |
|-------|-----------------|-----|
| 6.1   | Canada          | 177 |
| 6.1.1 | All Projections | 177 |
| 6.1.2 | By Mineral      | 179 |
| 6.2   | USA             | 180 |
| 6.2.1 | All Projections | 180 |
| 6.2.2 | By Mineral      | 181 |
| 6.3   | Total           | 182 |
| 6.3.1 | By country      | 182 |
| 6.3.2 | By mineral      | 183 |

## 7 South America 184

|       |                 |     |
|-------|-----------------|-----|
| 7.1   | Argentina       | 184 |
| 7.1.1 | All Projections | 184 |
| 7.1.2 | By Mineral      | 186 |
| 7.2   | Bolivia         | 187 |
| 7.2.1 | All Projections | 187 |
| 7.2.2 | By Mineral      | 188 |
| 7.3   | Brazil          | 189 |
| 7.3.1 | All Projections | 189 |
| 7.3.2 | By Mineral      | 190 |
| 7.4   | Chile           | 191 |
| 7.4.1 | All Projections | 191 |
| 7.4.2 | By Mineral      | 192 |
| 7.5   | Colombia        | 193 |
| 7.5.1 | All Projections | 193 |
| 7.5.2 | By Mineral      | 194 |
| 7.6   | Ecuador         | 195 |
| 7.6.1 | All Projections | 195 |
| 7.6.2 | By Mineral      | 196 |
| 7.7   | Peru            | 197 |
| 7.7.1 | All Projections | 197 |
| 7.7.2 | By Mineral      | 198 |
| 7.8   | Total           | 199 |

|          |                        |            |
|----------|------------------------|------------|
| 7.8.1    | By country . . . . .   | 199        |
| 7.8.2    | By mineral . . . . .   | 199        |
| <b>8</b> | <b>Total</b>           | <b>201</b> |
| 8.1      | By continent . . . . . | 201        |
| 8.2      | By mineral . . . . .   | 203        |
| 8.3      | By Country . . . . .   | 204        |

# Chapter 1

## Africa

### 1.1 Algeria

#### 1.1.1 All Projections

Table 1.1: Peak years - All

| <b>Name</b>  | <b>URR</b>  | <b>Peak Year</b> | <b>Peak Rate</b> |
|--------------|-------------|------------------|------------------|
| Zinc         | 7.53        | 2069             | 0.14             |
| <b>Total</b> | <b>7.53</b> | <b>2069</b>      | <b>0.14</b>      |

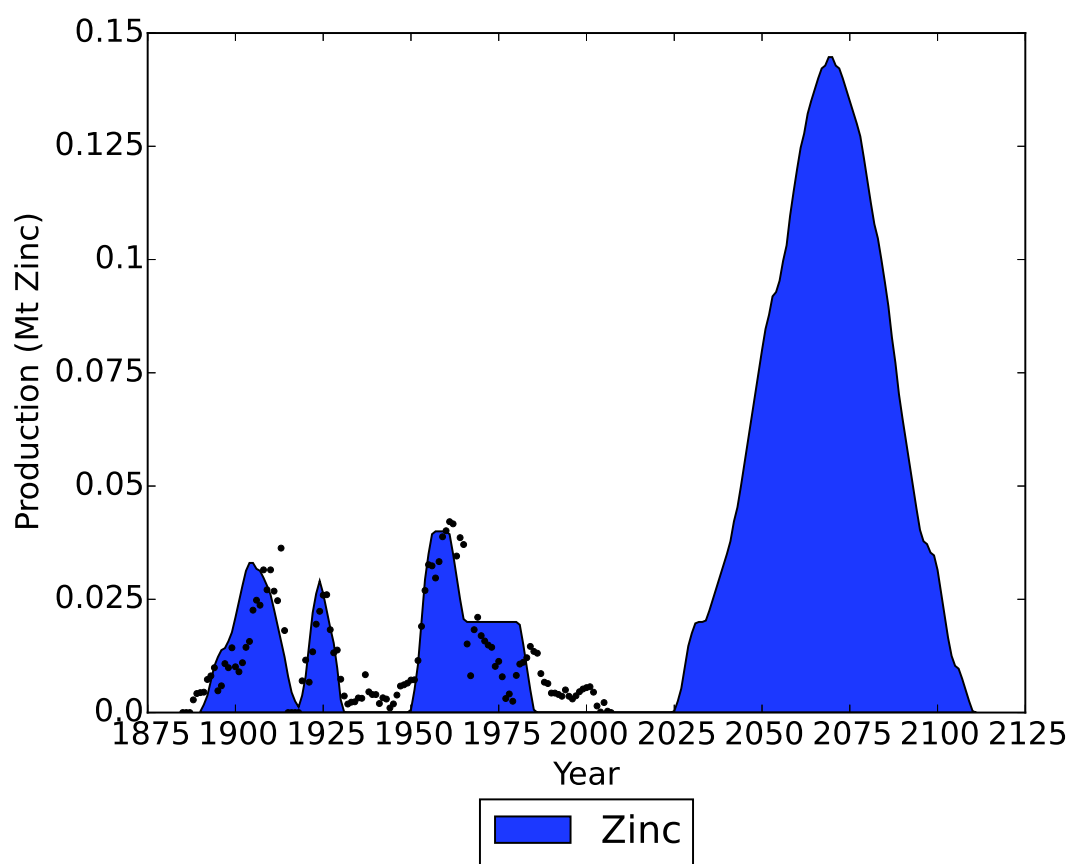

Figure 1.1: Algeria projections capped at 16

### 1.1.2 By Mineral

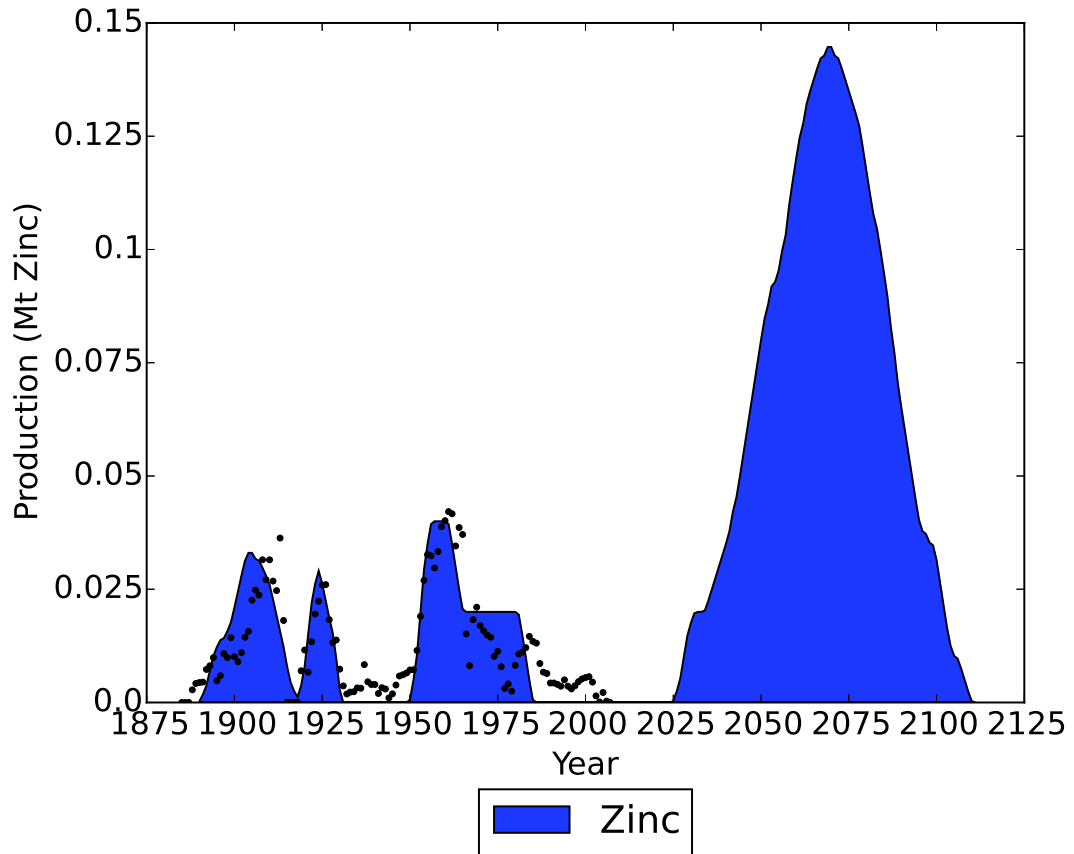

Figure 1.2: Algeria projection by mineral type

Table 1.2: Peak years - Minerals

| Name         | URR         | Peak Year   | Peak Rate   |
|--------------|-------------|-------------|-------------|
| Zinc         | 7.53        | 2069        | 0.14        |
| <b>Total</b> | <b>7.53</b> | <b>2069</b> | <b>0.14</b> |

## 1.2 Angola

### 1.2.1 All Projections

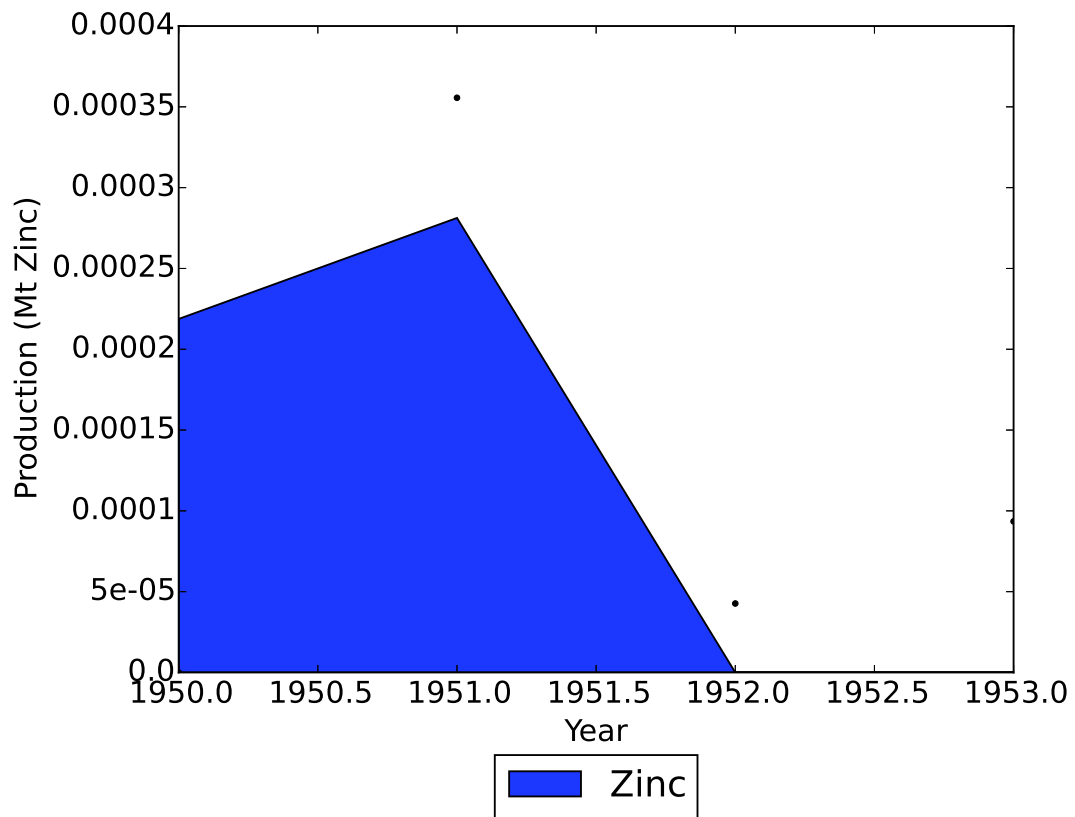

Figure 1.3: Angola projections capped at 16

| Table 1.3: Peak years - All |     |           |           |
|-----------------------------|-----|-----------|-----------|
| Name                        | URR | Peak Year | Peak Rate |
| Zinc                        | –   | 1951      | –         |
| Total                       | –   | 1951      | –         |

### 1.2.2 By Mineral

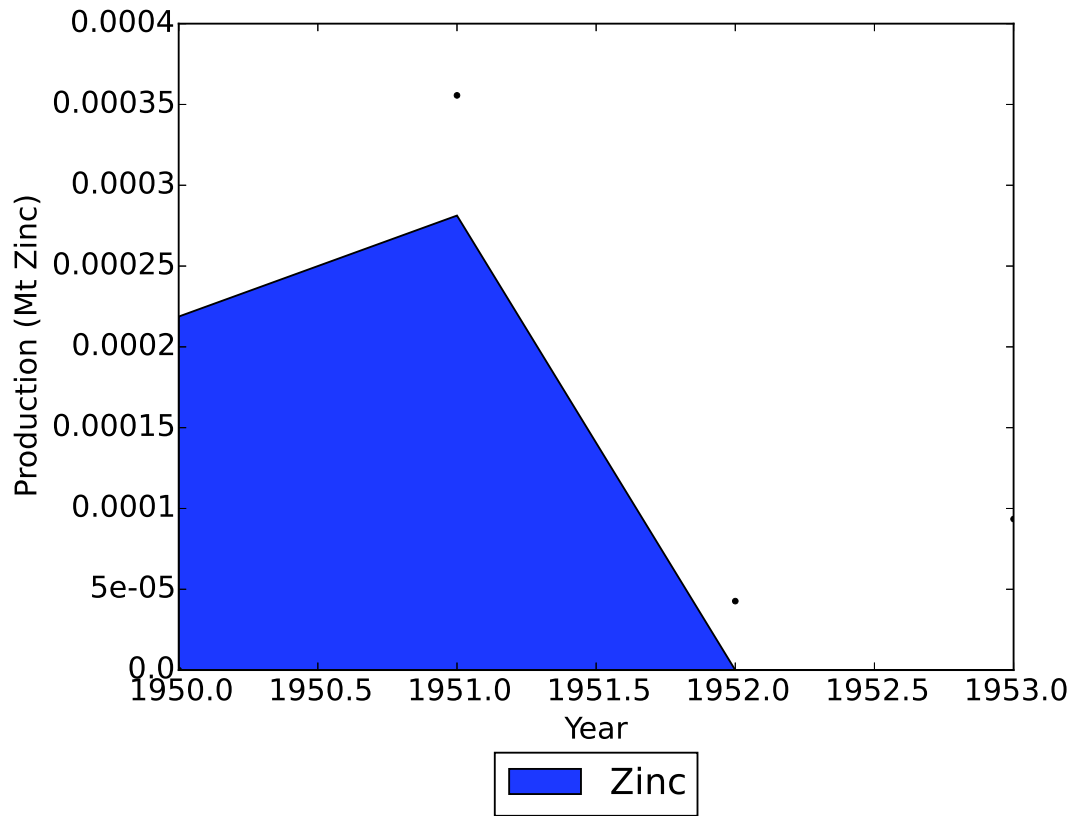

Figure 1.4: Angola projection by mineral type

Table 1.4: Peak years - Minerals

| Name         | URR | Peak Year   | Peak Rate |
|--------------|-----|-------------|-----------|
| Zinc         | –   | 1951        | –         |
| <b>Total</b> | –   | <b>1951</b> | –         |

## 1.3 Botswana

### 1.3.1 All Projections

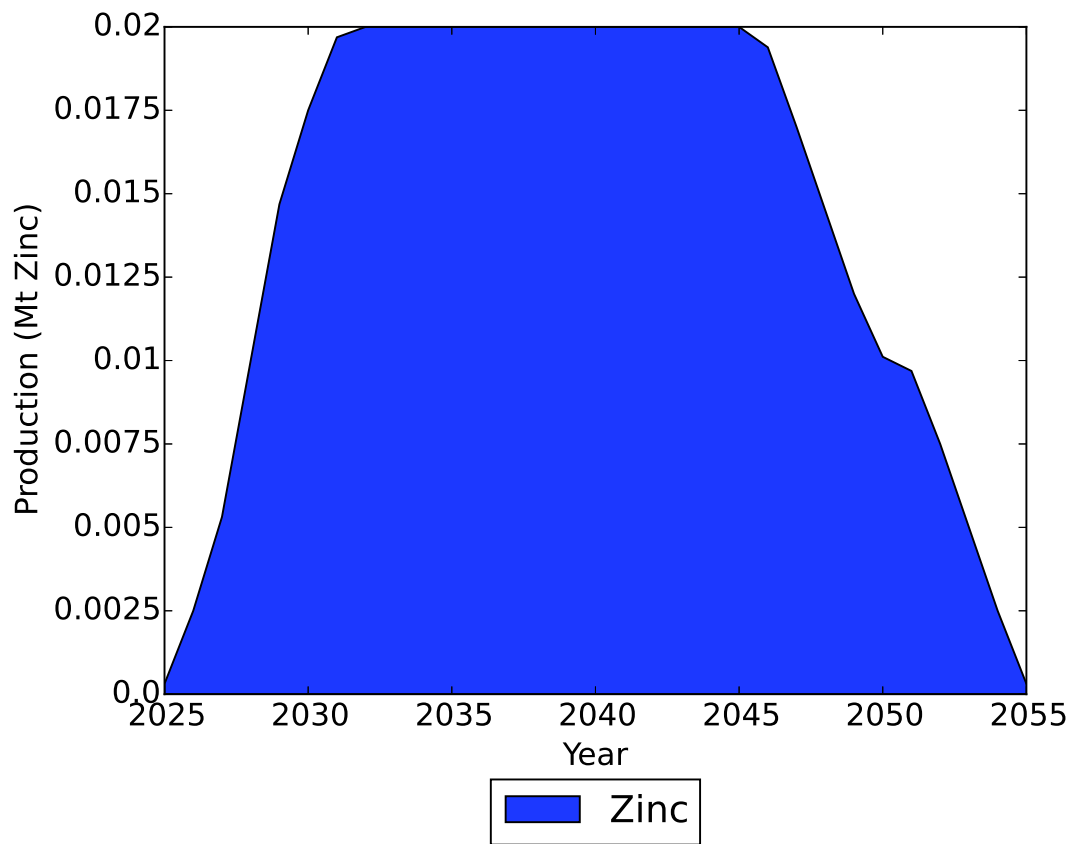

Figure 1.5: Botswana projections capped at 16

| Table 1.5: Peak years - All |      |           |           |
|-----------------------------|------|-----------|-----------|
| Name                        | URR  | Peak Year | Peak Rate |
| Zinc                        | 0.45 | 2032      | 0.02      |
| Total                       | 0.45 | 2032      | 0.02      |



### 1.3.2 By Mineral

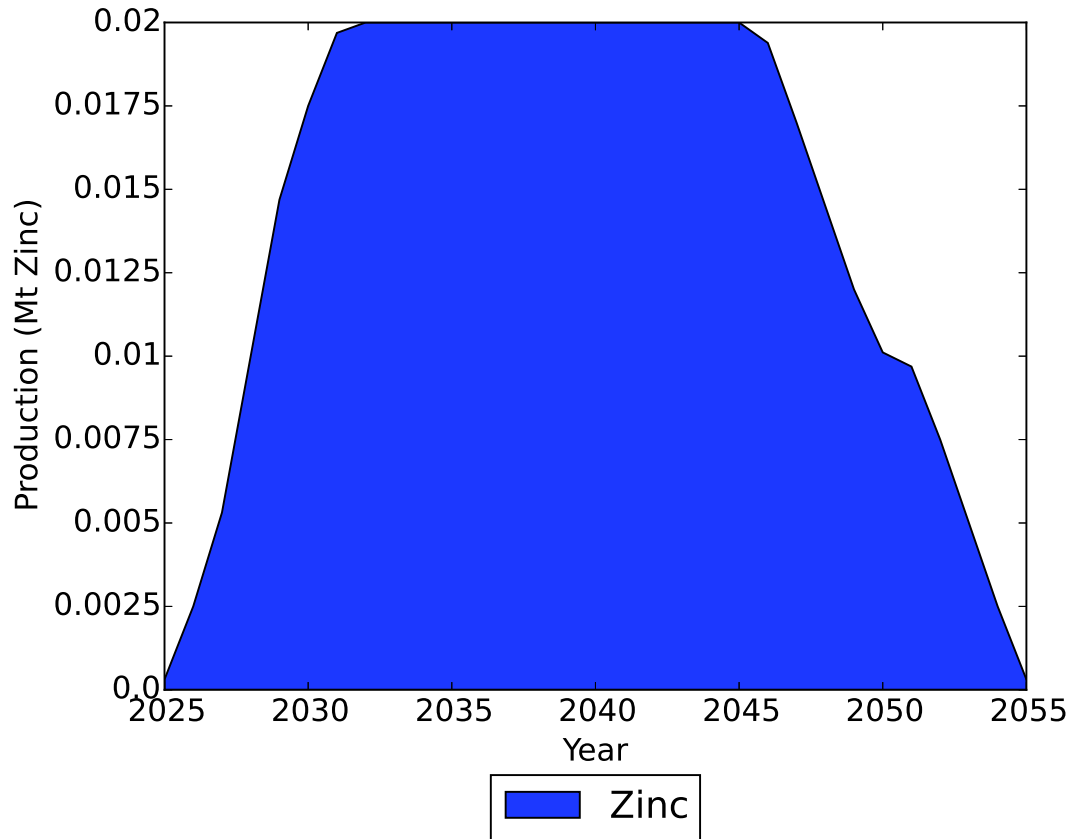

Figure 1.6: Botswana projection by mineral type

Table 1.6: Peak years - Minerals

| Name         | URR         | Peak Year   | Peak Rate   |
|--------------|-------------|-------------|-------------|
| Zinc         | 0.45        | 2032        | 0.02        |
| <b>Total</b> | <b>0.45</b> | <b>2032</b> | <b>0.02</b> |

## 1.4 Burkina Faso

### 1.4.1 All Projections

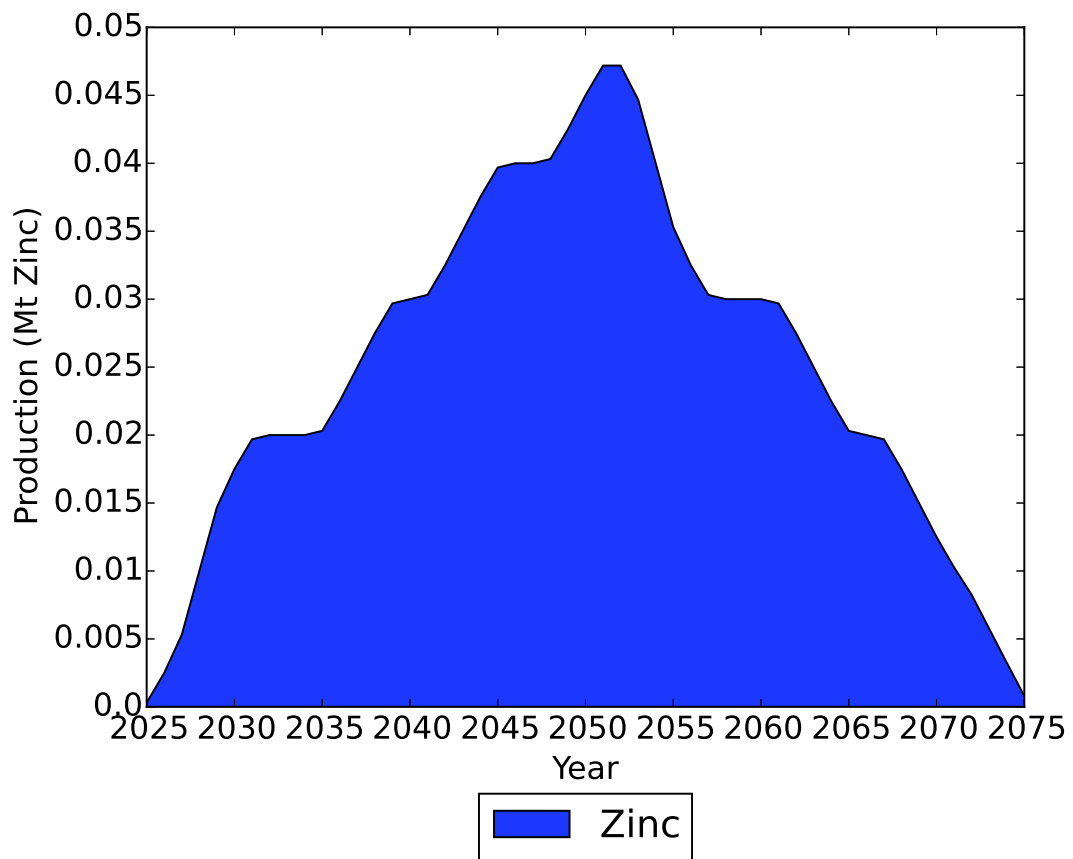

Figure 1.7: Burkina Faso projections capped at 16

| Table 1.7: Peak years - All |      |           |           |
|-----------------------------|------|-----------|-----------|
| Name                        | URR  | Peak Year | Peak Rate |
| Zinc                        | 1.27 | 2051      | 0.05      |
| Total                       | 1.27 | 2051      | 0.05      |

1.4.2 By Mineral

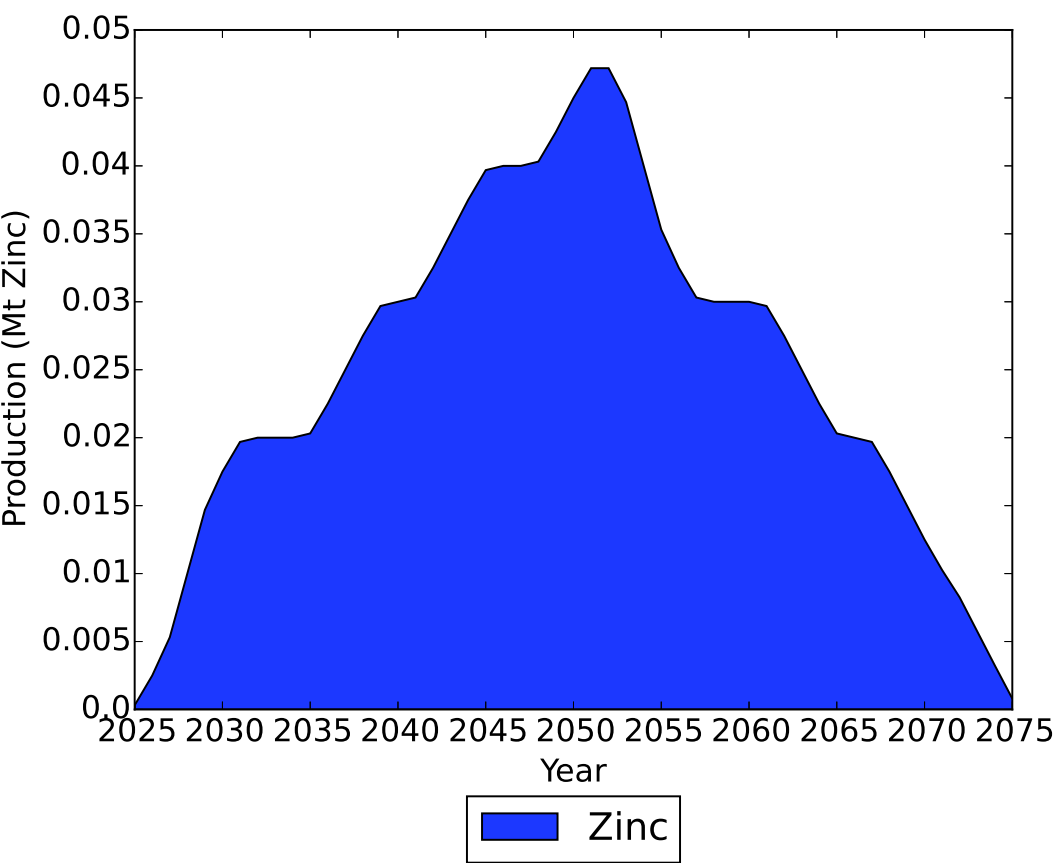

Figure 1.8: Burkina Faso projection by mineral type

| Table 1.8: Peak years - Minerals |      |           |           |
|----------------------------------|------|-----------|-----------|
| Name                             | URR  | Peak Year | Peak Rate |
| Zinc                             | 1.27 | 2051      | 0.05      |
| Total                            | 1.27 | 2051      | 0.05      |

## 1.5 Congo

### 1.5.1 All Projections

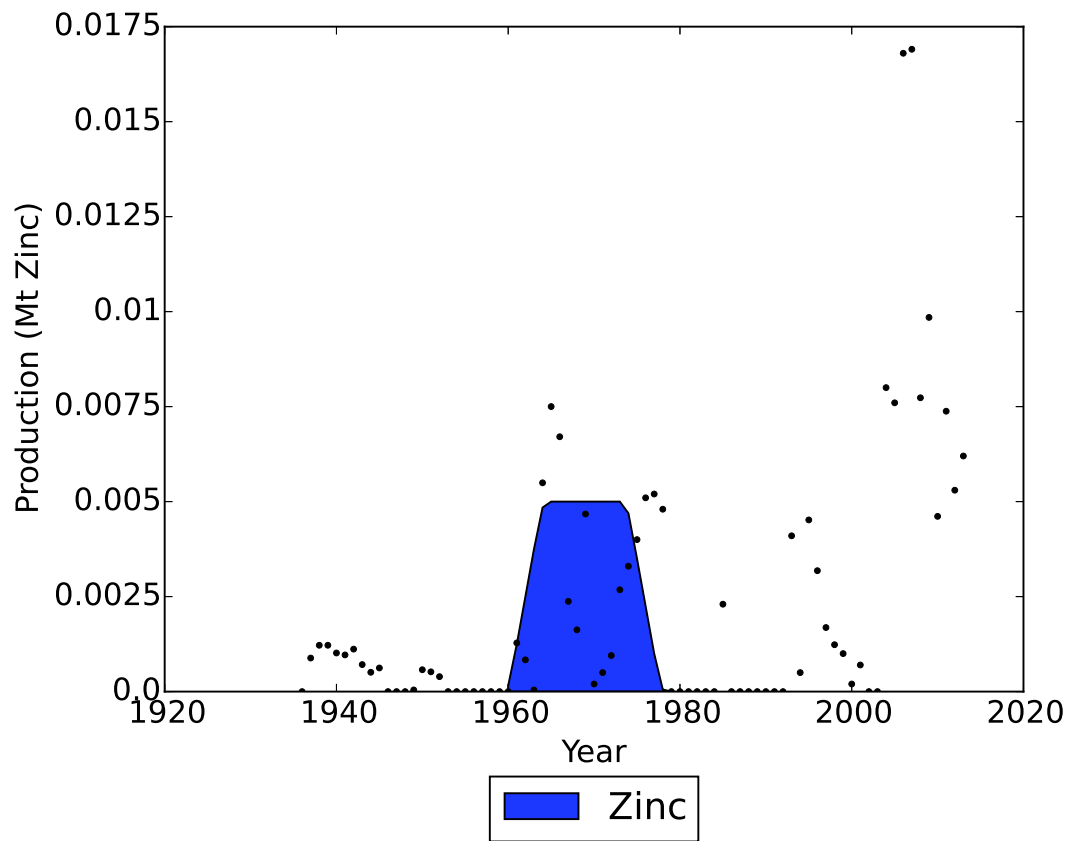

Figure 1.9: Congo projections capped at 16

| Table 1.9: Peak years - All |             |             |             |
|-----------------------------|-------------|-------------|-------------|
| Name                        | URR         | Peak Year   | Peak Rate   |
| Zinc                        | 0.07        | 1965        | 0.01        |
| <b>Total</b>                | <b>0.07</b> | <b>1965</b> | <b>0.01</b> |

1.5.2 By Mineral

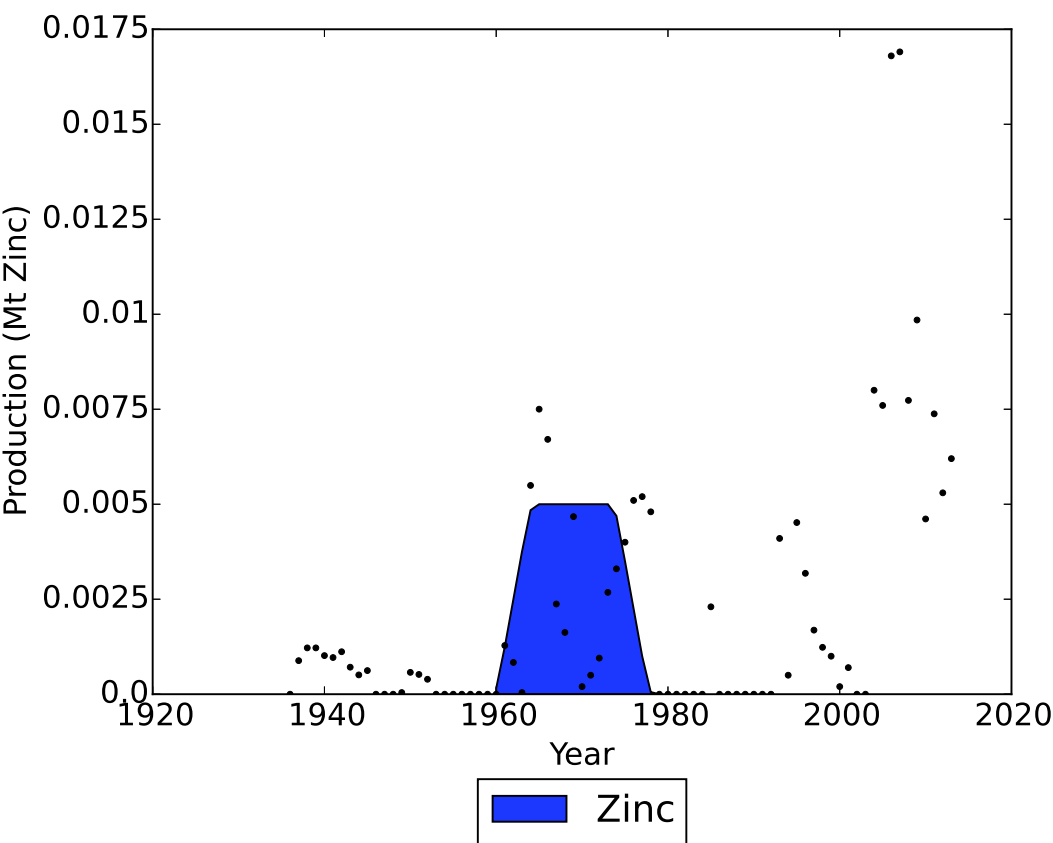

Figure 1.10: Congo projection by mineral type

| Table 1.10: Peak years - Minerals |      |           |           |
|-----------------------------------|------|-----------|-----------|
| Name                              | URR  | Peak Year | Peak Rate |
| Zinc                              | 0.07 | 1965      | 0.01      |
| Total                             | 0.07 | 1965      | 0.01      |

## 1.6 Egypt

### 1.6.1 All Projections

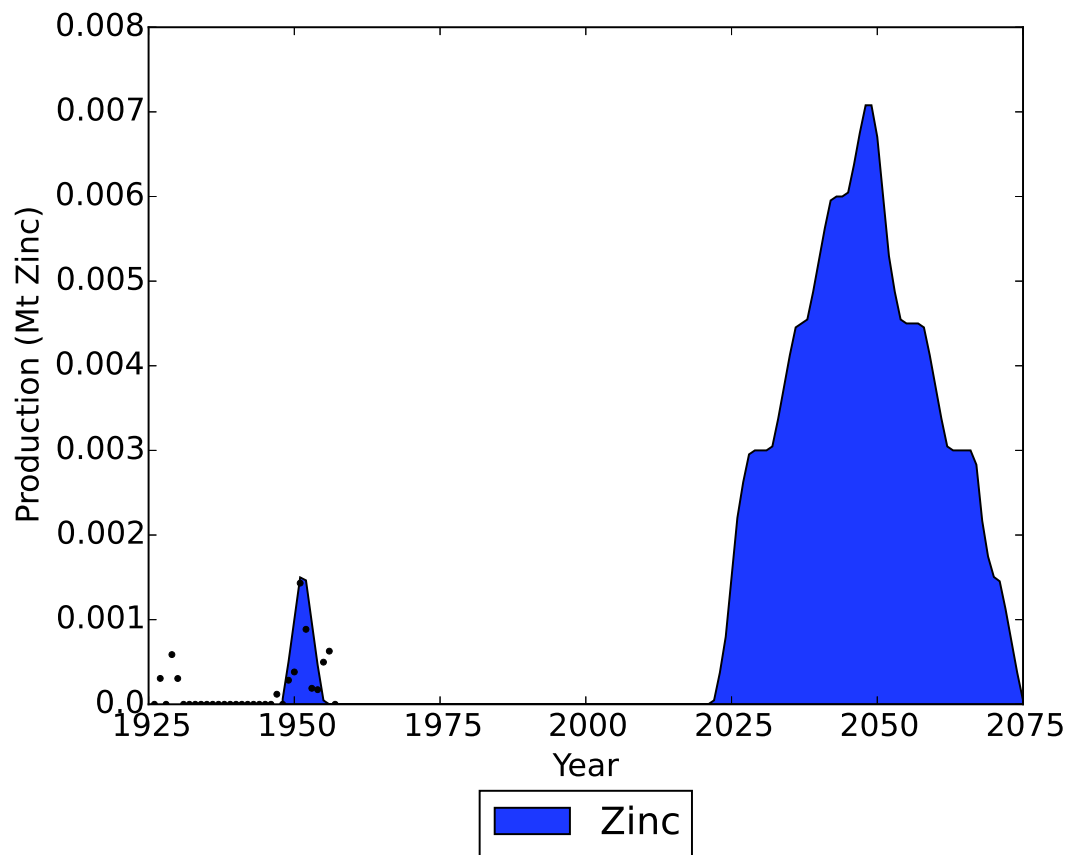

Figure 1.11: Egypt projections capped at 16

Table 1.11: Peak years - All

| Name  | URR | Peak Year | Peak Rate |
|-------|-----|-----------|-----------|
| Zinc  | 0.2 | 2048      | 0.01      |
| Total | 0.2 | 2048      | 0.01      |

1.6.2 By Mineral

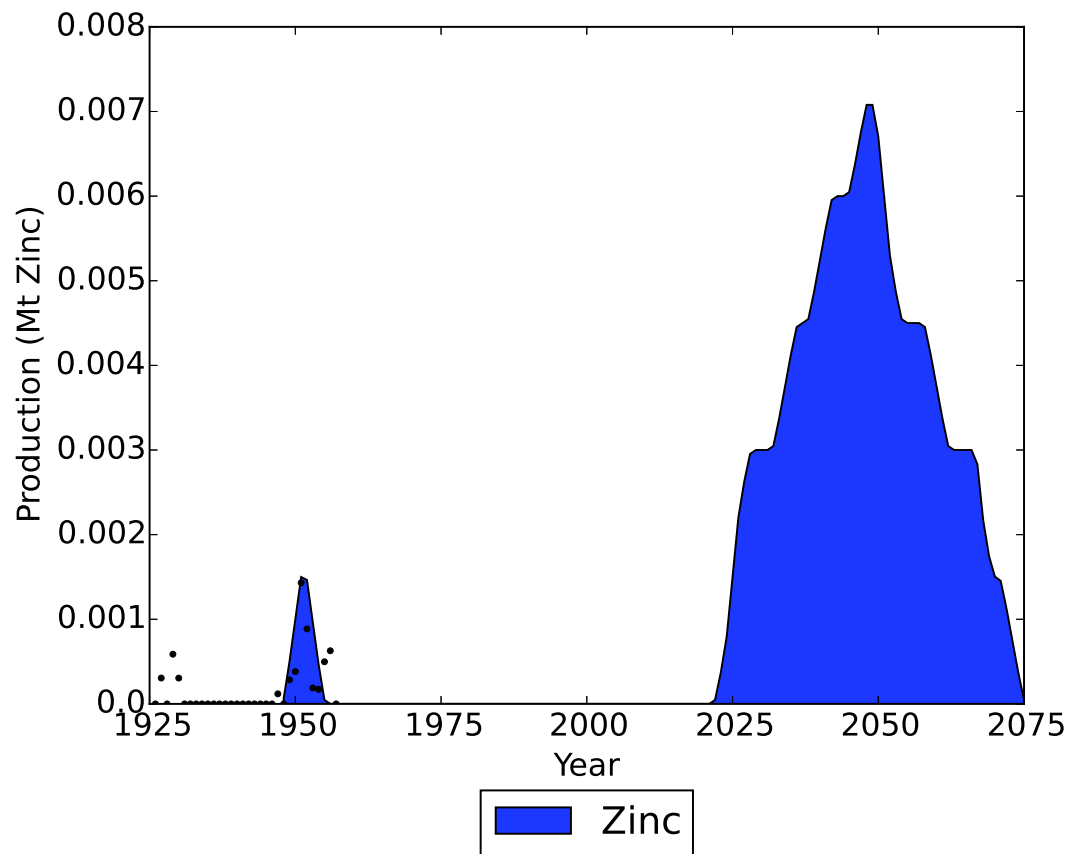

Figure 1.12: Egypt projection by mineral type

| Table 1.12: Peak years - Minerals |     |           |           |
|-----------------------------------|-----|-----------|-----------|
| Name                              | URR | Peak Year | Peak Rate |
| Zinc                              | 0.2 | 2048      | 0.01      |
| Total                             | 0.2 | 2048      | 0.01      |

1.7 Eritrea

1.7.1 All Projections

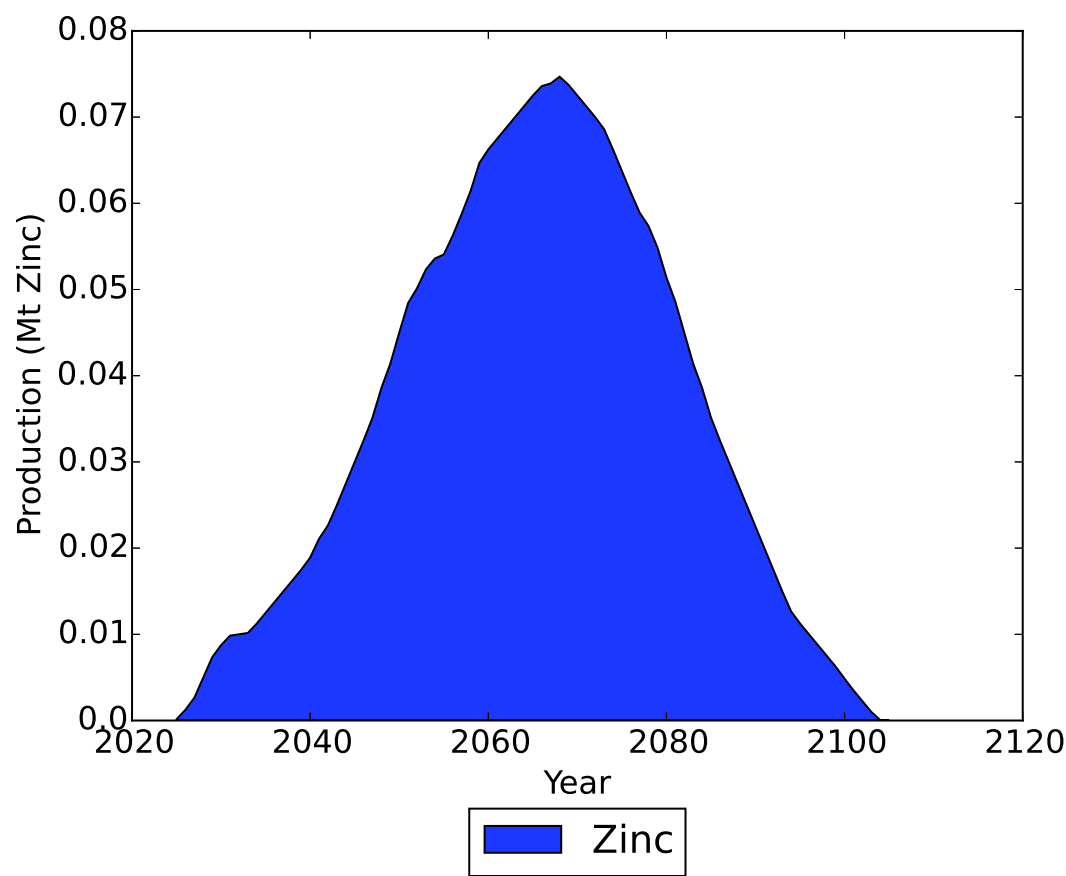

Figure 1.13: Eritrea projections capped at 16

| Table 1.13: Peak years - All |      |           |           |
|------------------------------|------|-----------|-----------|
| Name                         | URR  | Peak Year | Peak Rate |
| Zinc                         | 2.85 | 2068      | 0.07      |
| Total                        | 2.85 | 2068      | 0.07      |



1.7.2 By Mineral

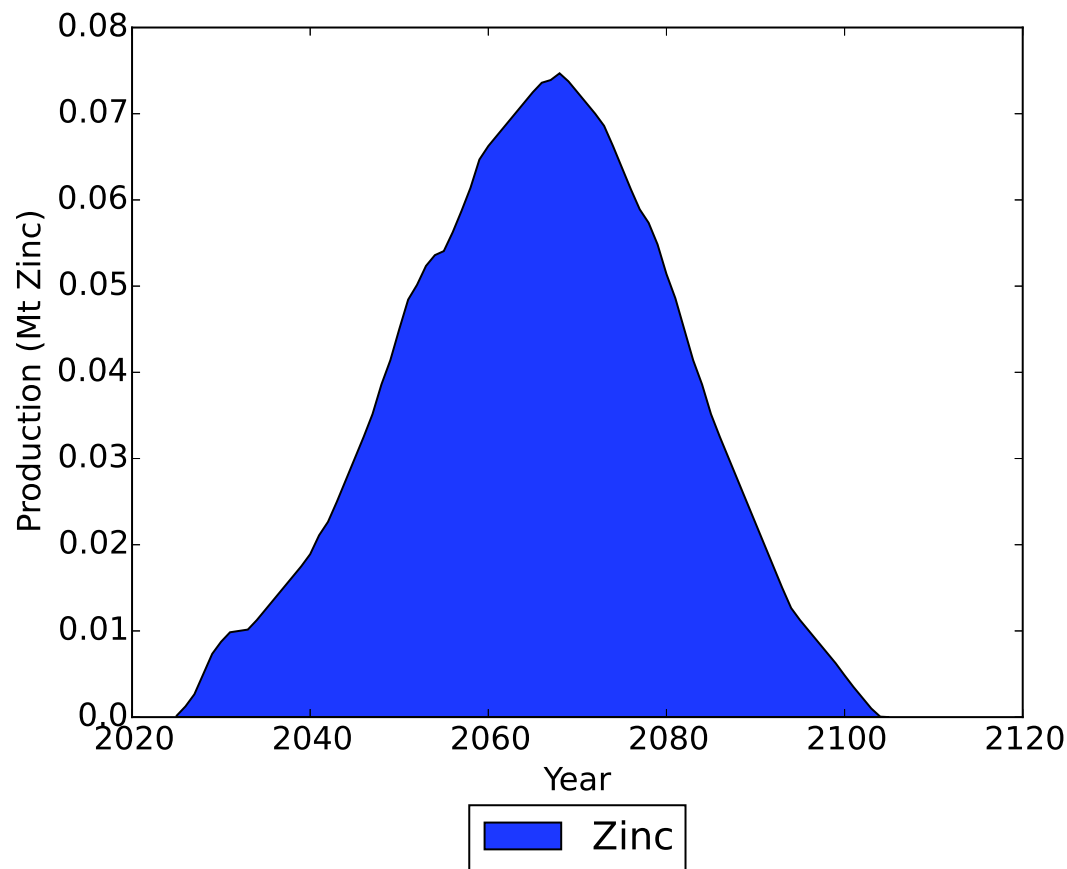

Figure 1.14: Eritrea projection by mineral type

| Table 1.14: Peak years - Minerals |      |           |           |
|-----------------------------------|------|-----------|-----------|
| Name                              | URR  | Peak Year | Peak Rate |
| Zinc                              | 2.85 | 2068      | 0.07      |
| Total                             | 2.85 | 2068      | 0.07      |

## 1.8 Kenya

### 1.8.1 All Projections

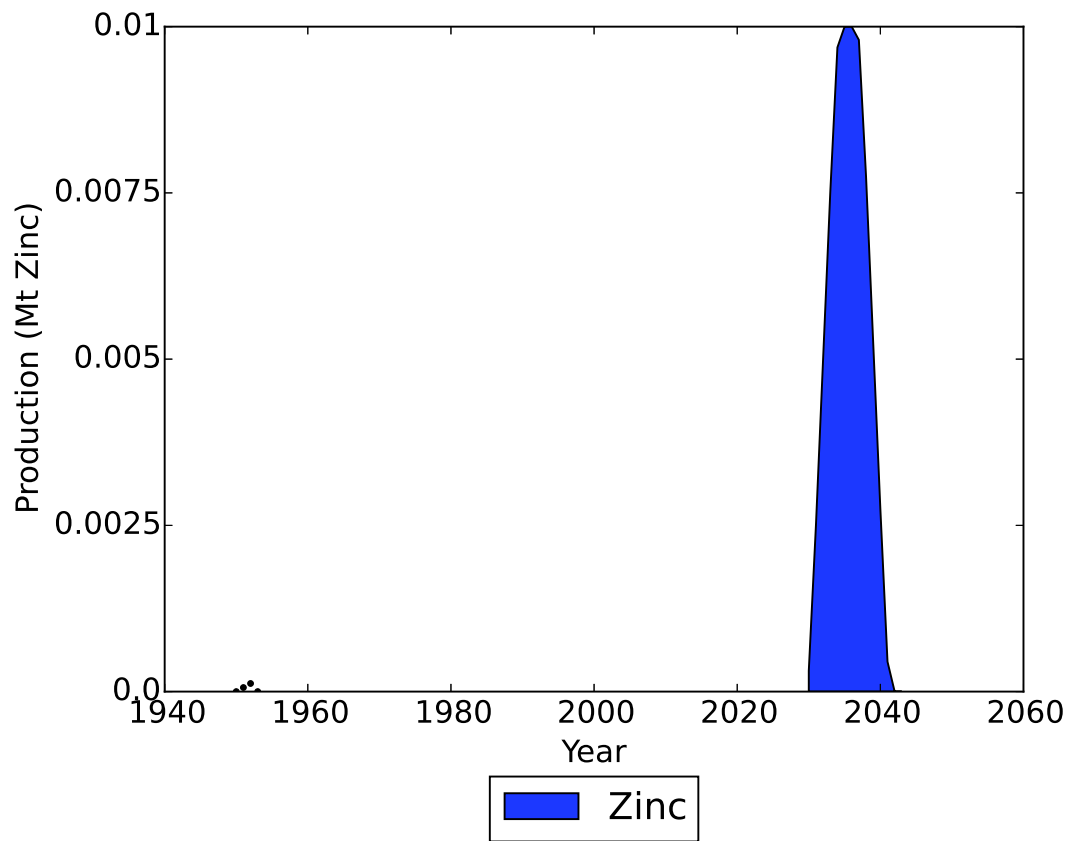

Figure 1.15: Kenya projections capped at 16

Table 1.15: Peak years - All

| Name         | URR         | Peak Year   | Peak Rate   |
|--------------|-------------|-------------|-------------|
| Zinc         | 0.07        | 2035        | 0.01        |
| <b>Total</b> | <b>0.07</b> | <b>2035</b> | <b>0.01</b> |

### 1.8.2 By Mineral

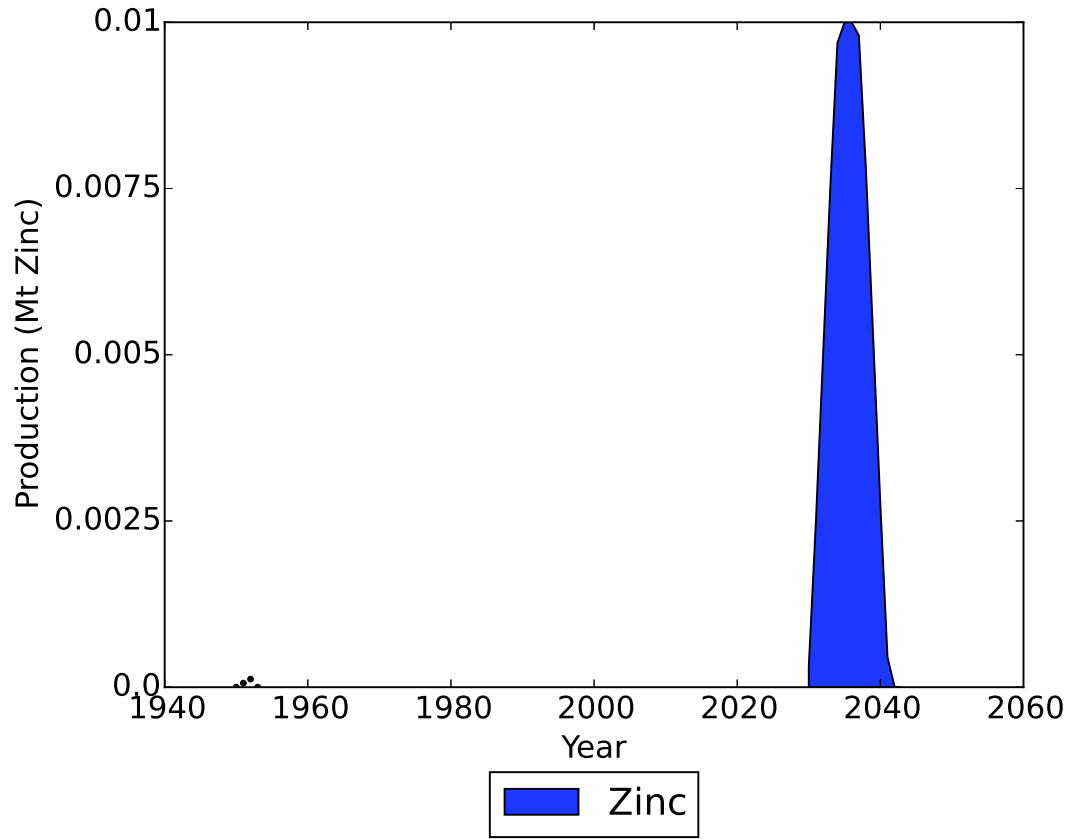

Figure 1.16: Kenya projection by mineral type

| Table 1.16: Peak years - Minerals |             |             |             |
|-----------------------------------|-------------|-------------|-------------|
| Name                              | URR         | Peak Year   | Peak Rate   |
| Zinc                              | 0.07        | 2035        | 0.01        |
| <b>Total</b>                      | <b>0.07</b> | <b>2035</b> | <b>0.01</b> |

## 1.9 Morocco

### 1.9.1 All Projections

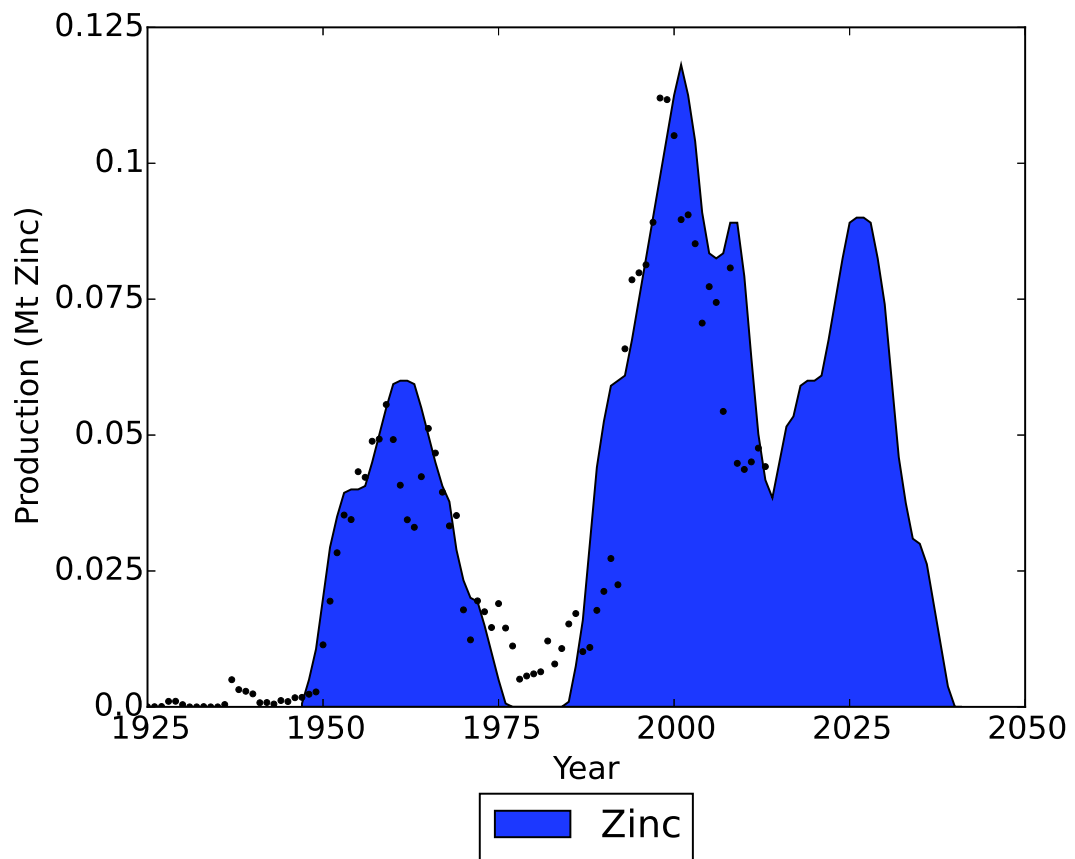

Figure 1.17: Morocco projections capped at 16

| Table 1.17: Peak years - All |      |           |           |
|------------------------------|------|-----------|-----------|
| Name                         | URR  | Peak Year | Peak Rate |
| Zinc                         | 4.48 | 2001      | 0.12      |
| Total                        | 4.48 | 2001      | 0.12      |

1.9.2 By Mineral

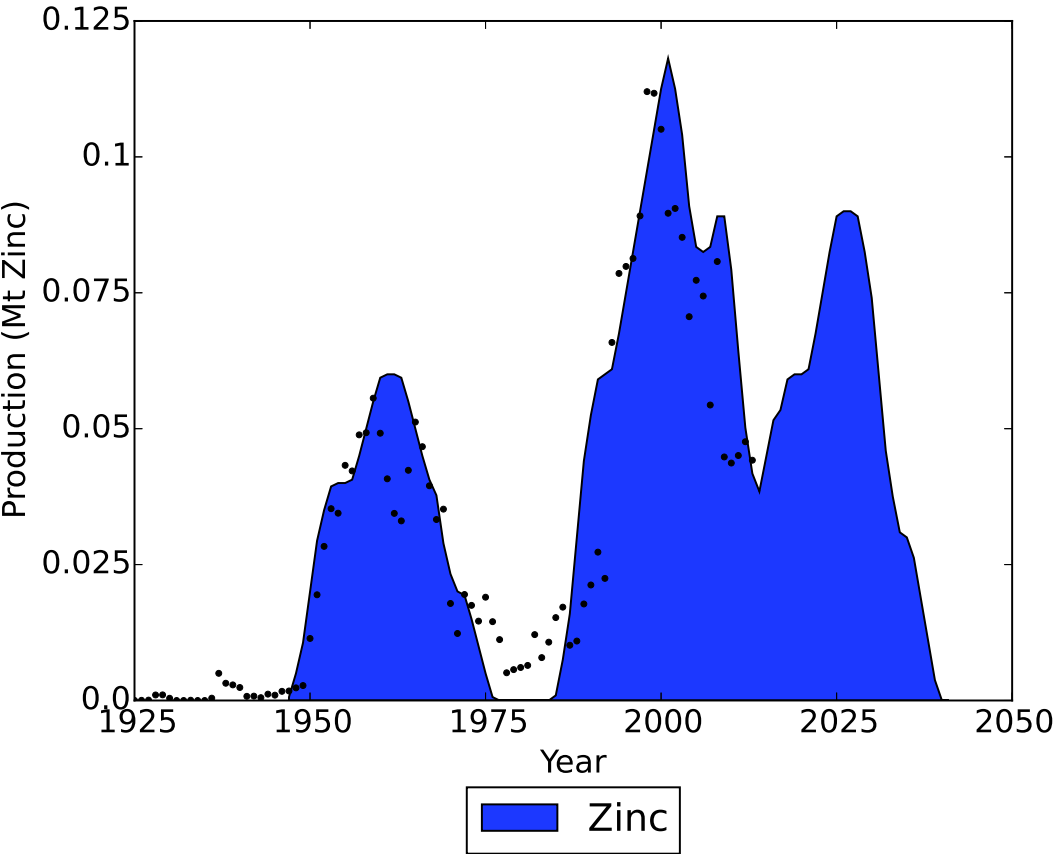

Figure 1.18: Morocco projection by mineral type

| Table 1.18: Peak years - Minerals |      |           |           |
|-----------------------------------|------|-----------|-----------|
| Name                              | URR  | Peak Year | Peak Rate |
| Zinc                              | 4.48 | 2001      | 0.12      |
| Total                             | 4.48 | 2001      | 0.12      |

1.10 Namibia

1.10.1 All Projections

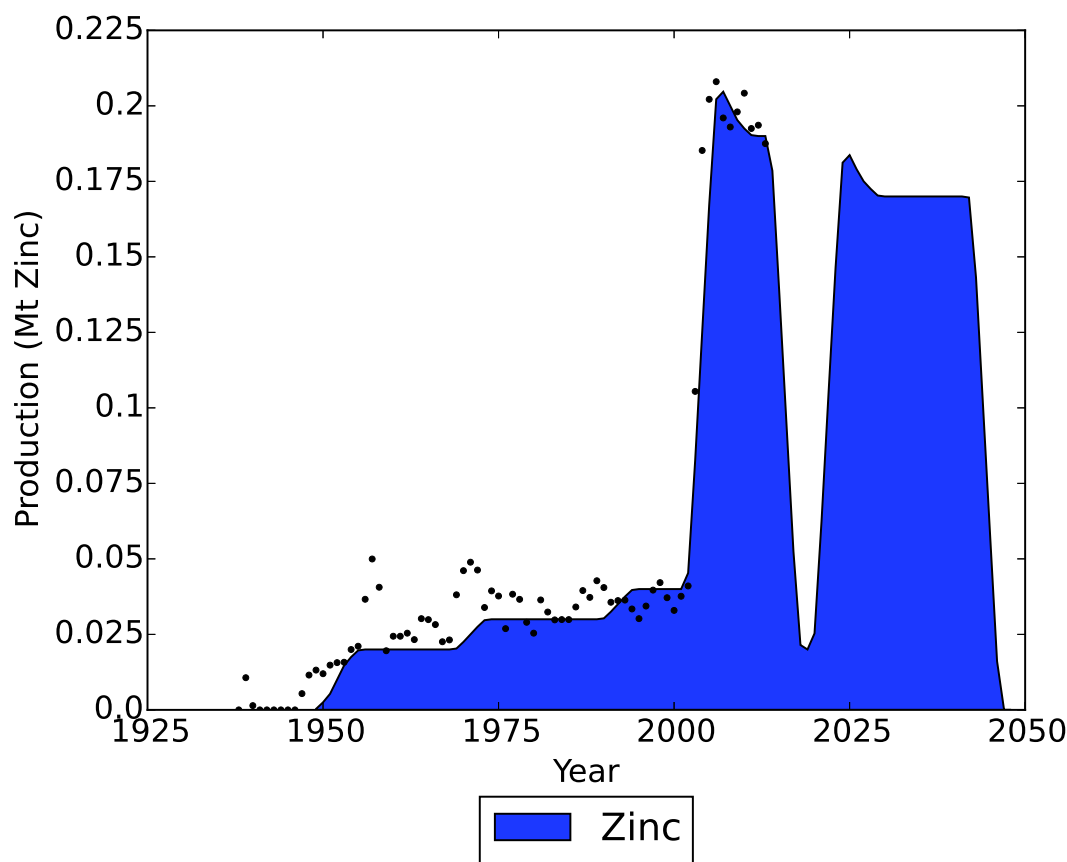

Figure 1.19: Namibia projections capped at 16

Table 1.19: Peak years - All

| Name  | URR  | Peak Year | Peak Rate |
|-------|------|-----------|-----------|
| Zinc  | 7.81 | 2007      | 0.2       |
| Total | 7.81 | 2007      | 0.2       |

1.10.2 By Mineral

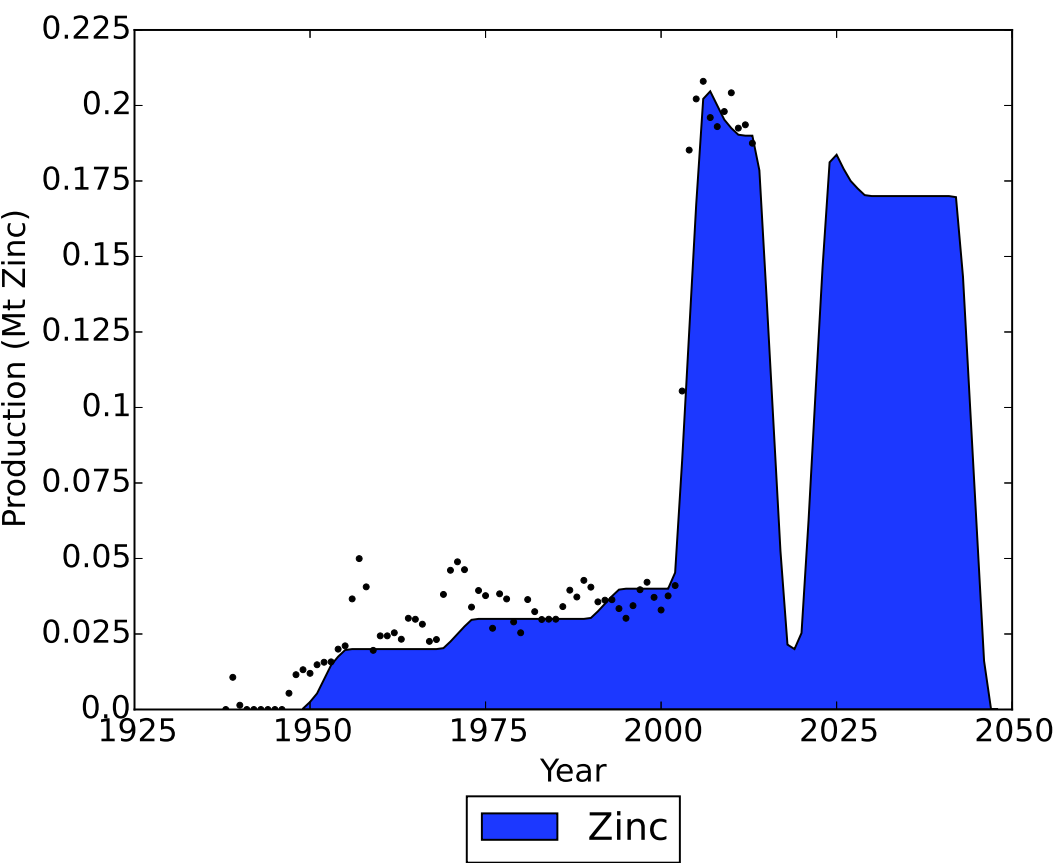

Figure 1.20: Namibia projection by mineral type

| Table 1.20: Peak years - Minerals |      |           |           |
|-----------------------------------|------|-----------|-----------|
| Name                              | URR  | Peak Year | Peak Rate |
| Zinc                              | 7.81 | 2007      | 0.2       |
| Total                             | 7.81 | 2007      | 0.2       |

1.11 Nigeria

1.11.1 All Projections

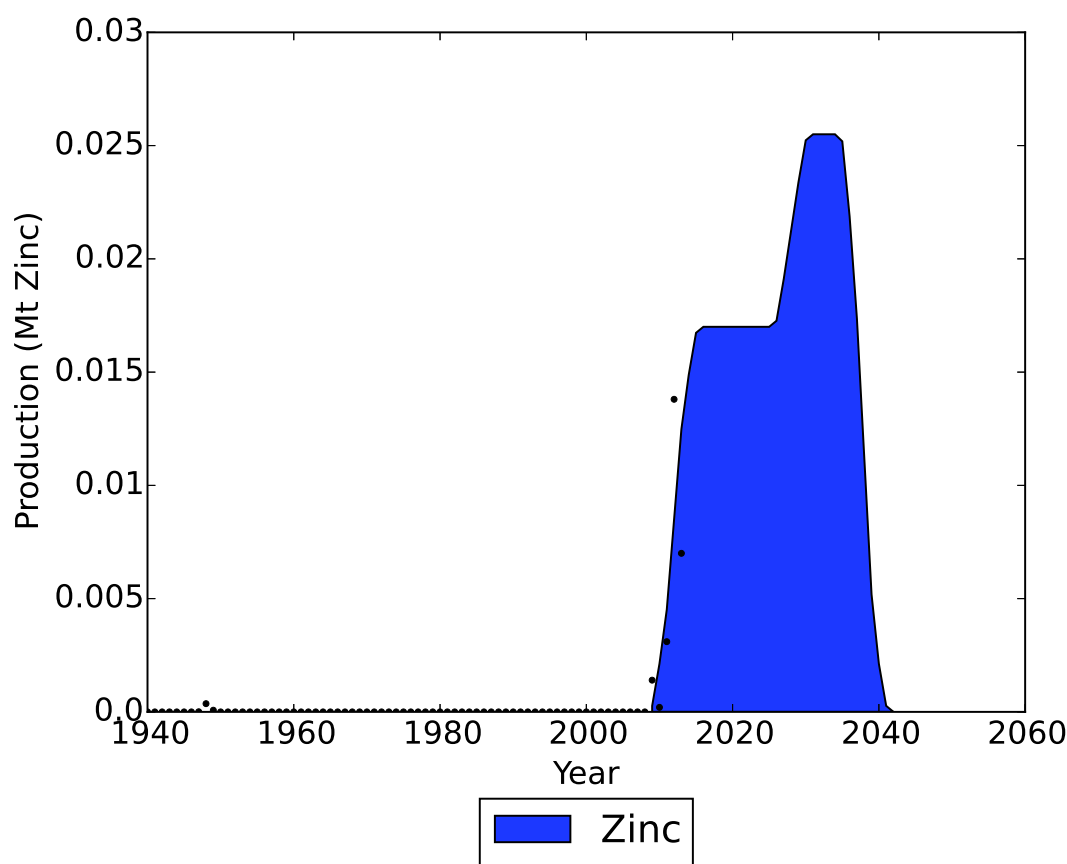

Figure 1.21: Nigeria projections capped at 16

| Table 1.21: Peak years - All |      |           |           |
|------------------------------|------|-----------|-----------|
| Name                         | URR  | Peak Year | Peak Rate |
| Zinc                         | 0.52 | 2031      | 0.03      |
| Total                        | 0.52 | 2031      | 0.03      |



1.11.2 By Mineral

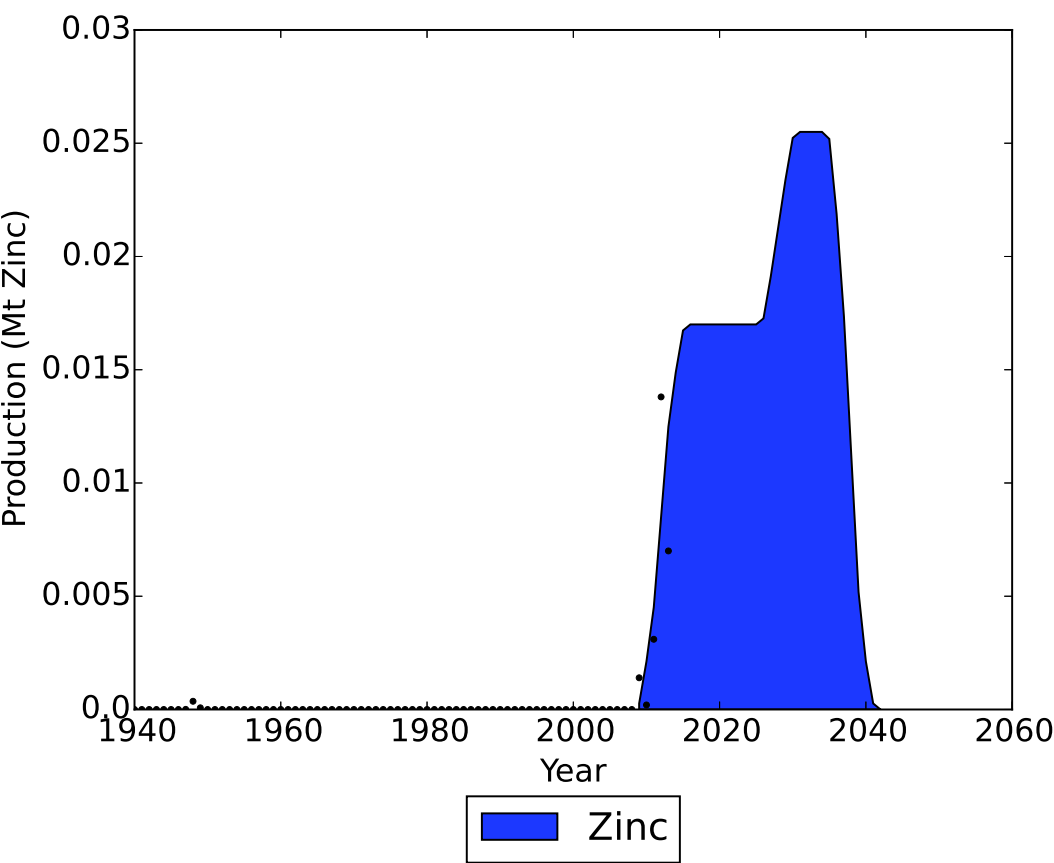

Figure 1.22: Nigeria projection by mineral type

| Table 1.22: Peak years - Minerals |      |           |           |
|-----------------------------------|------|-----------|-----------|
| Name                              | URR  | Peak Year | Peak Rate |
| Zinc                              | 0.52 | 2031      | 0.03      |
| Total                             | 0.52 | 2031      | 0.03      |

## 1.12 South Africa

### 1.12.1 All Projections

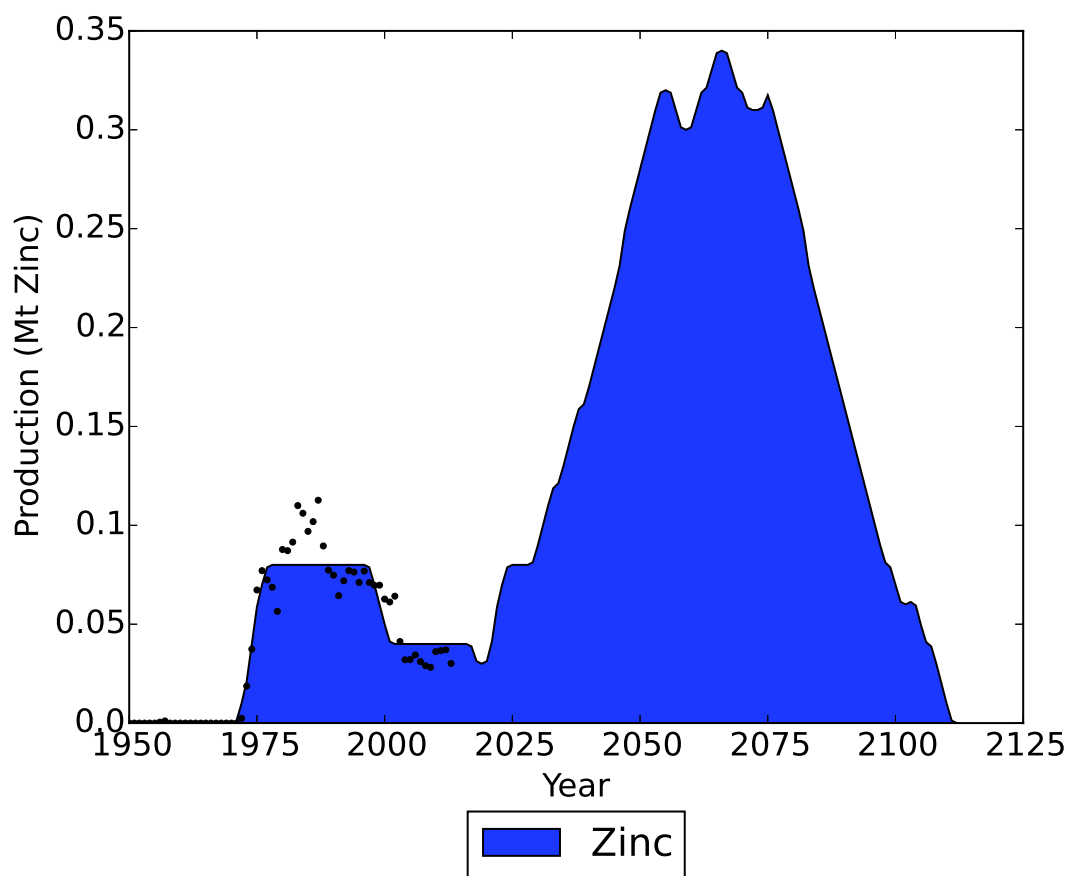

Figure 1.23: South Africa projections capped at 16

| Table 1.23: Peak years - All |       |           |           |
|------------------------------|-------|-----------|-----------|
| Name                         | URR   | Peak Year | Peak Rate |
| Zinc                         | 20.14 | 2066      | 0.34      |
| Total                        | 20.14 | 2066      | 0.34      |

1.12.2 By Mineral

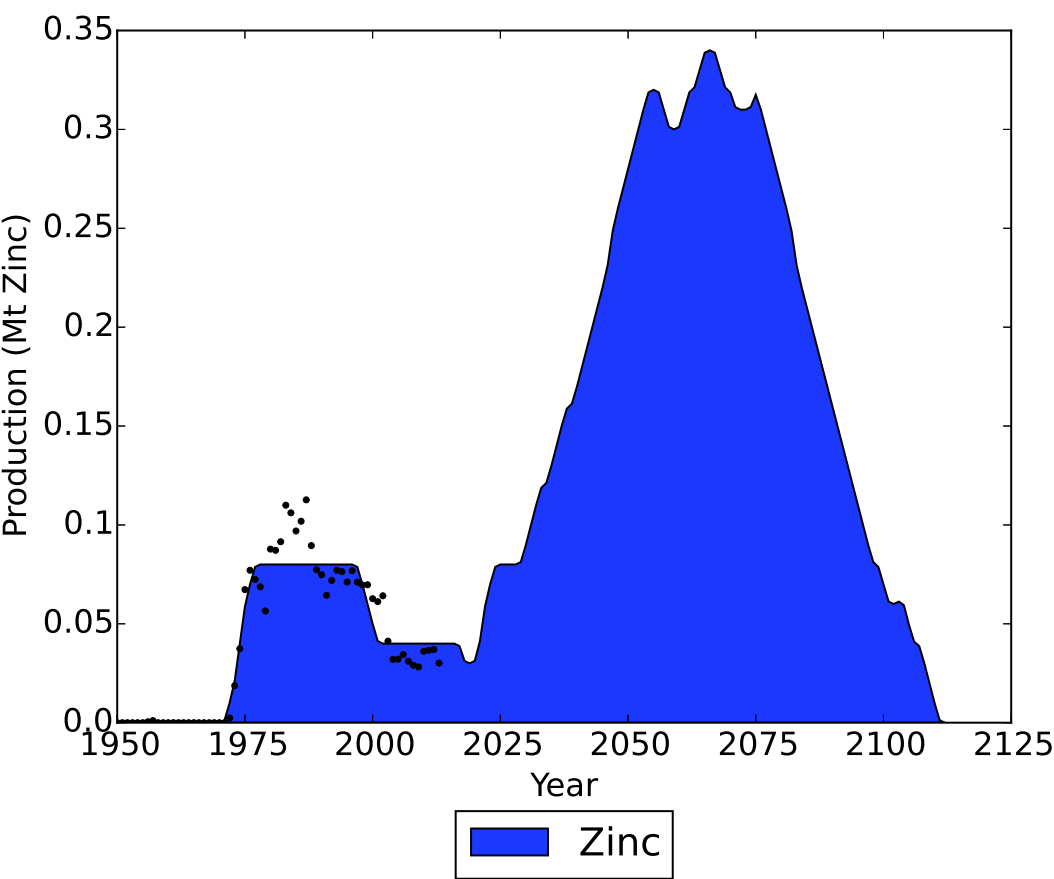

Figure 1.24: South Africa projection by mineral type

| Table 1.24: Peak years - Minerals |       |           |           |
|-----------------------------------|-------|-----------|-----------|
| Name                              | URR   | Peak Year | Peak Rate |
| Zinc                              | 20.14 | 2066      | 0.34      |
| Total                             | 20.14 | 2066      | 0.34      |

1.13 Sudan

1.13.1 All Projections

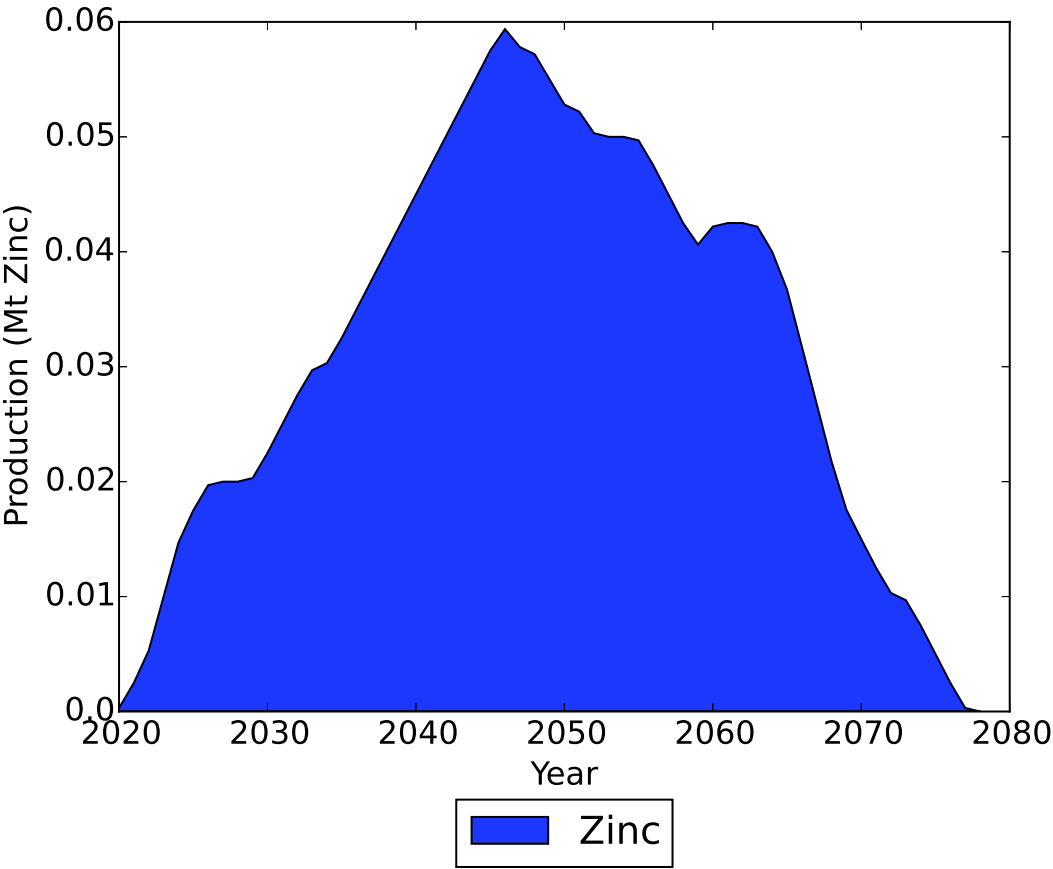

Figure 1.25: Sudan projections capped at 16

| Table 1.25: Peak years - All |      |           |           |
|------------------------------|------|-----------|-----------|
| Name                         | URR  | Peak Year | Peak Rate |
| Zinc                         | 1.88 | 2046      | 0.06      |
| Total                        | 1.88 | 2046      | 0.06      |

1.13.2 By Mineral

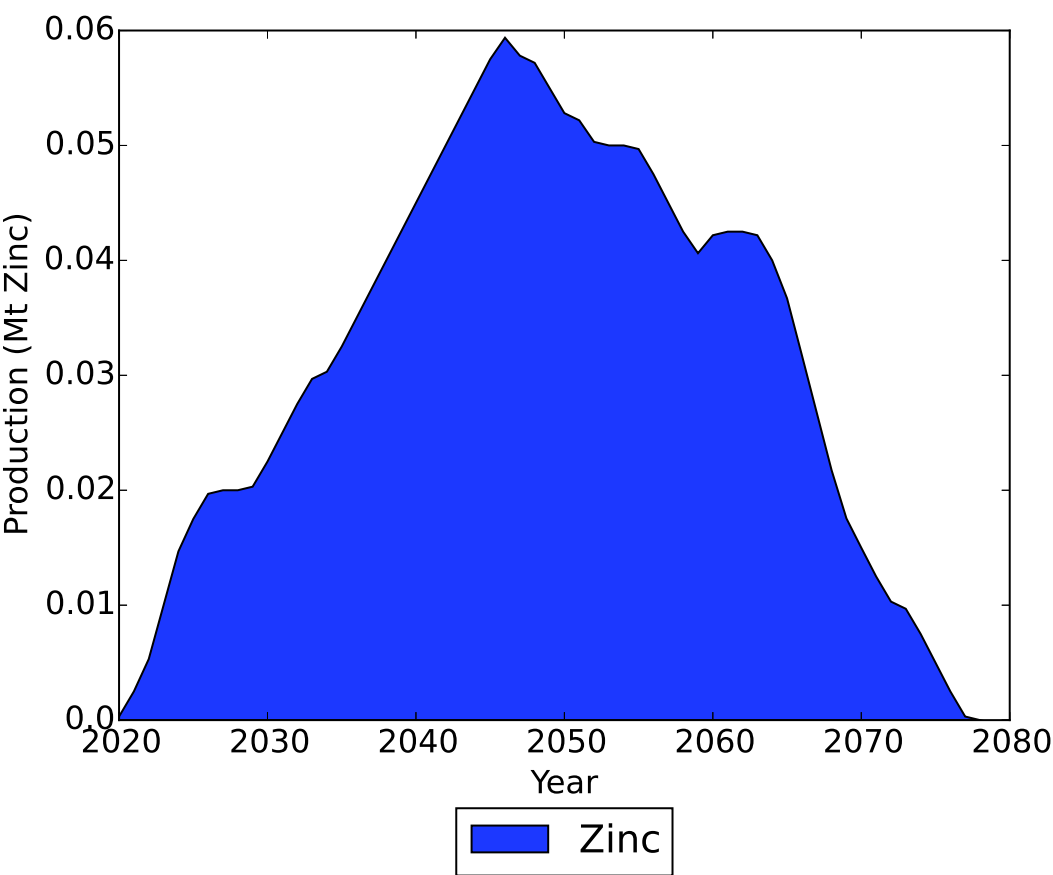

Figure 1.26: Sudan projection by mineral type

| Table 1.26: Peak years - Minerals |      |           |           |
|-----------------------------------|------|-----------|-----------|
| Name                              | URR  | Peak Year | Peak Rate |
| Zinc                              | 1.88 | 2046      | 0.06      |
| Total                             | 1.88 | 2046      | 0.06      |

1.14 Tanzania

1.14.1 All Projections

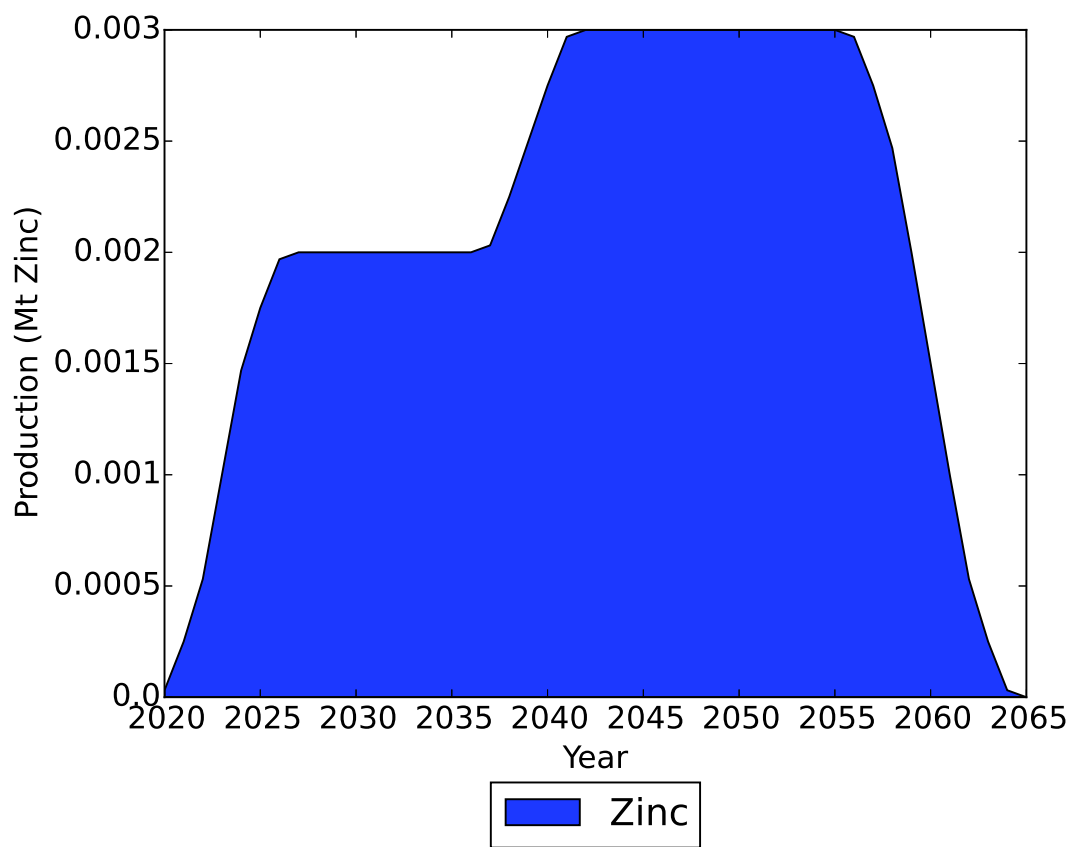

Figure 1.27: Tanzania projections capped at 16

Table 1.27: Peak years - All

| Name  | URR | Peak Year | Peak Rate |
|-------|-----|-----------|-----------|
| Zinc  | 0.1 | 2042      | –         |
| Total | 0.1 | 2048      | –         |

1.14.2 By Mineral

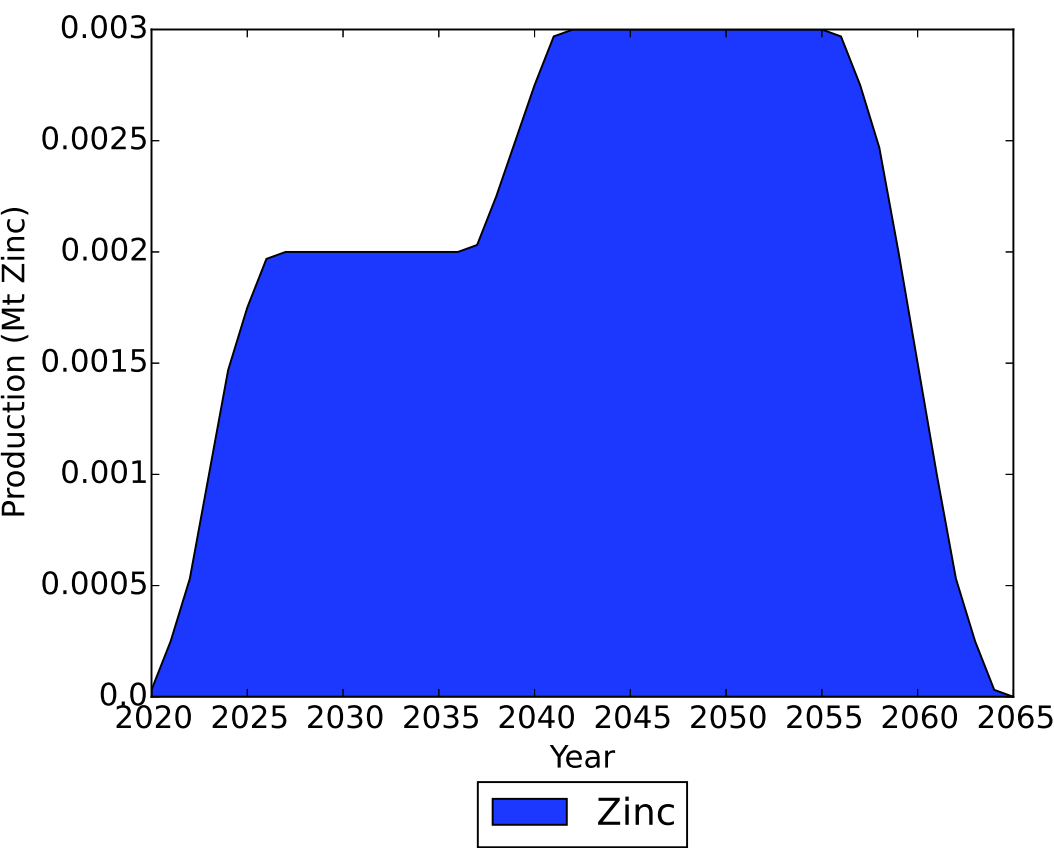

Figure 1.28: Tanzania projection by mineral type

| Table 1.28: Peak years - Minerals |     |           |           |
|-----------------------------------|-----|-----------|-----------|
| Name                              | URR | Peak Year | Peak Rate |
| Zinc                              | 0.1 | 2042      | –         |
| Total                             | 0.1 | 2048      | –         |

1.15 Tunisia

1.15.1 All Projections

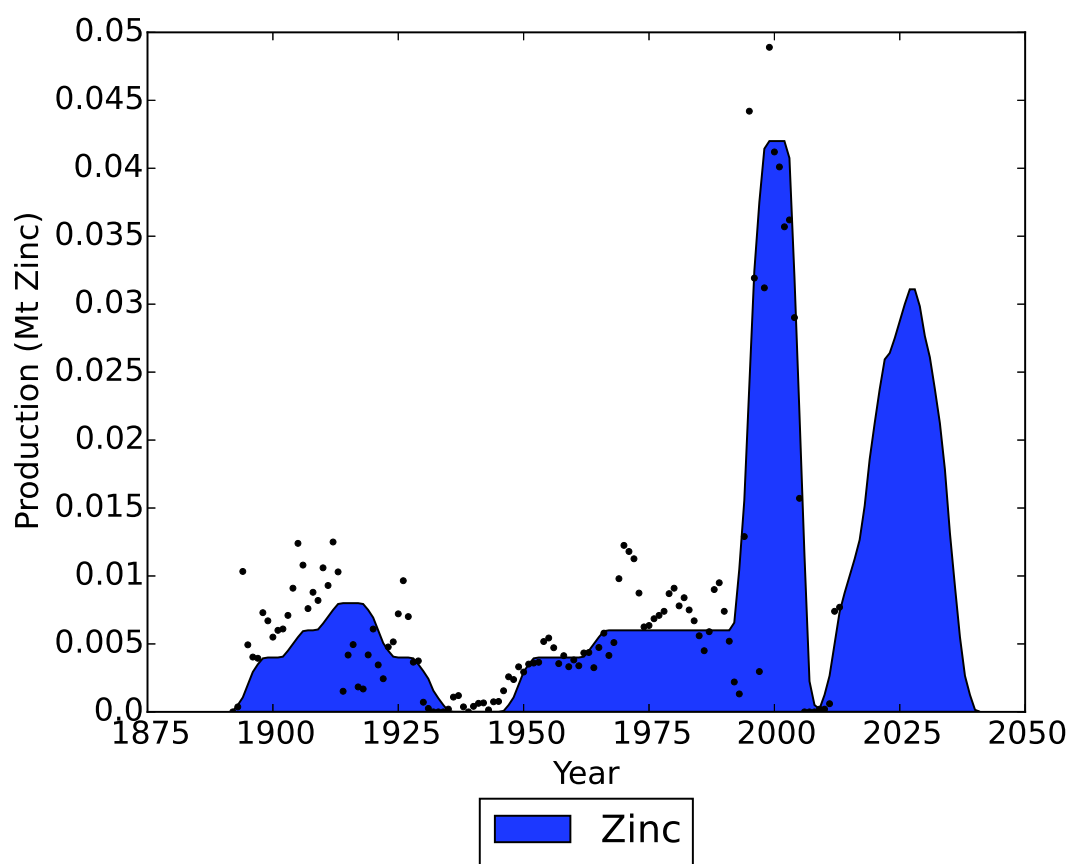

Figure 1.29: Tunisia projections capped at 16

Table 1.29: Peak years - All

| Name  | URR  | Peak Year | Peak Rate |
|-------|------|-----------|-----------|
| Zinc  | 1.39 | 1999      | 0.04      |
| Total | 1.39 | 1999      | 0.04      |



1.15.2 By Mineral

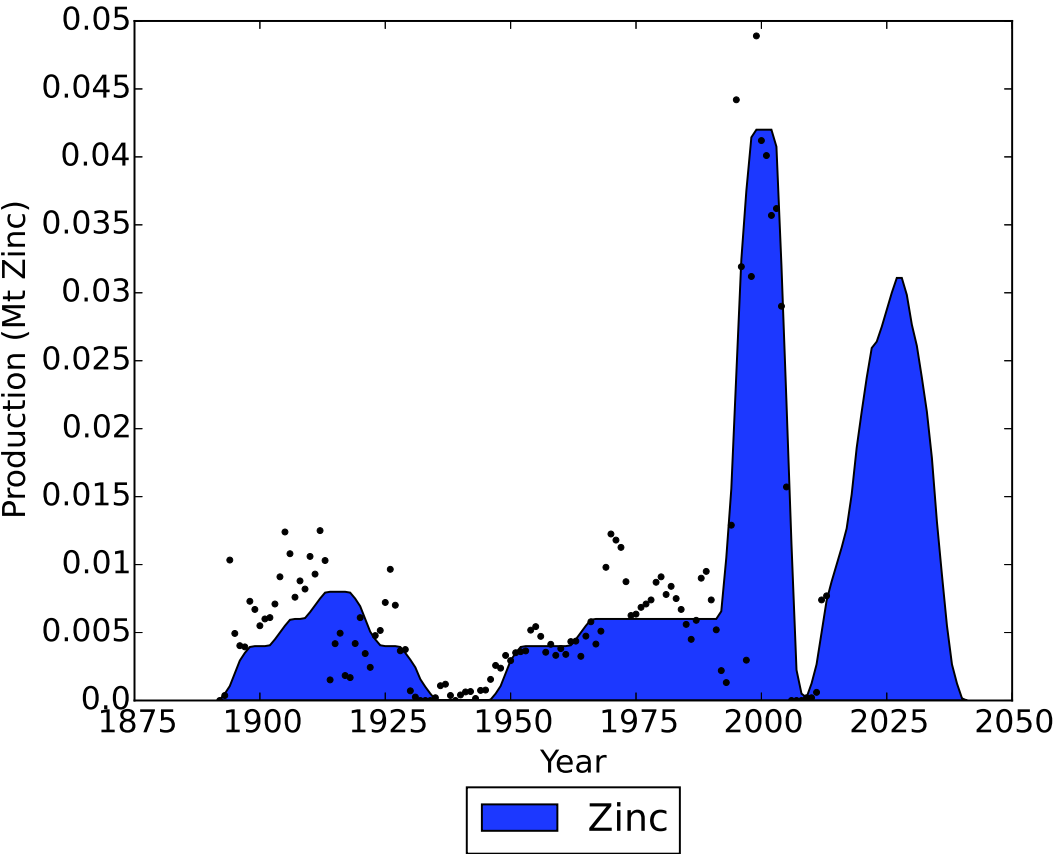

Figure 1.30: Tunisia projection by mineral type

| Table 1.30: Peak years - Minerals |             |             |             |
|-----------------------------------|-------------|-------------|-------------|
| Name                              | URR         | Peak Year   | Peak Rate   |
| Zinc                              | 1.39        | 1999        | 0.04        |
| <b>Total</b>                      | <b>1.39</b> | <b>1999</b> | <b>0.04</b> |

1.16 Zaire

1.16.1 All Projections

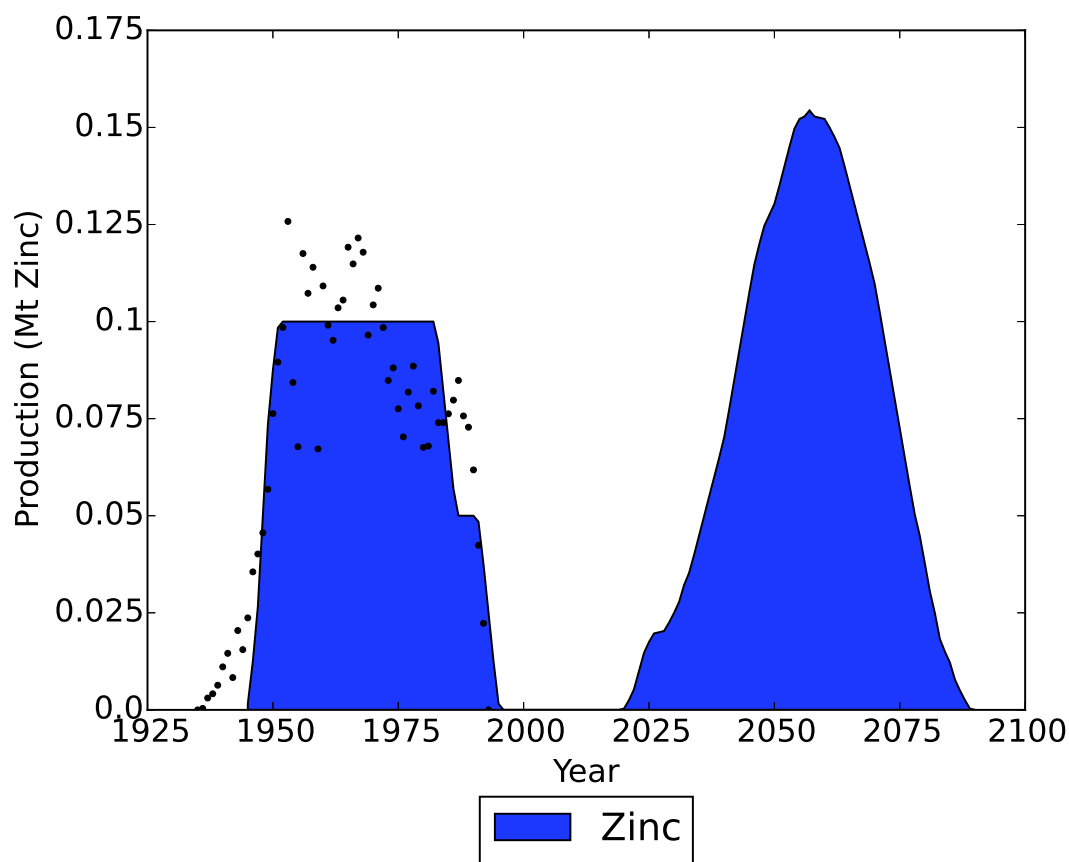

Figure 1.31: Zaire projections capped at 16

Table 1.31: Peak years - All

| Name  | URR  | Peak Year | Peak Rate |
|-------|------|-----------|-----------|
| Zinc  | 9.41 | 2057      | 0.15      |
| Total | 9.41 | 2057      | 0.15      |

1.16.2 By Mineral

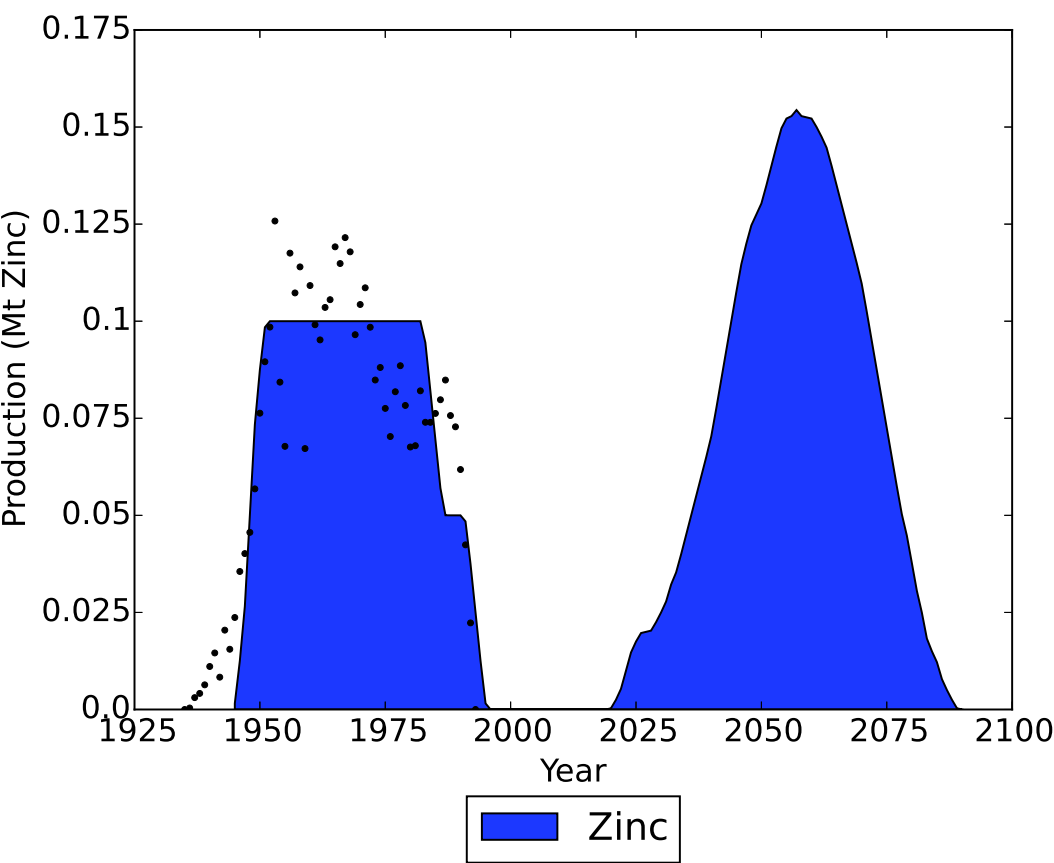

Figure 1.32: Zaire projection by mineral type

| Table 1.32: Peak years - Minerals |      |           |           |
|-----------------------------------|------|-----------|-----------|
| Name                              | URR  | Peak Year | Peak Rate |
| Zinc                              | 9.41 | 2057      | 0.15      |
| Total                             | 9.41 | 2057      | 0.15      |

1.17 Zambia

1.17.1 All Projections

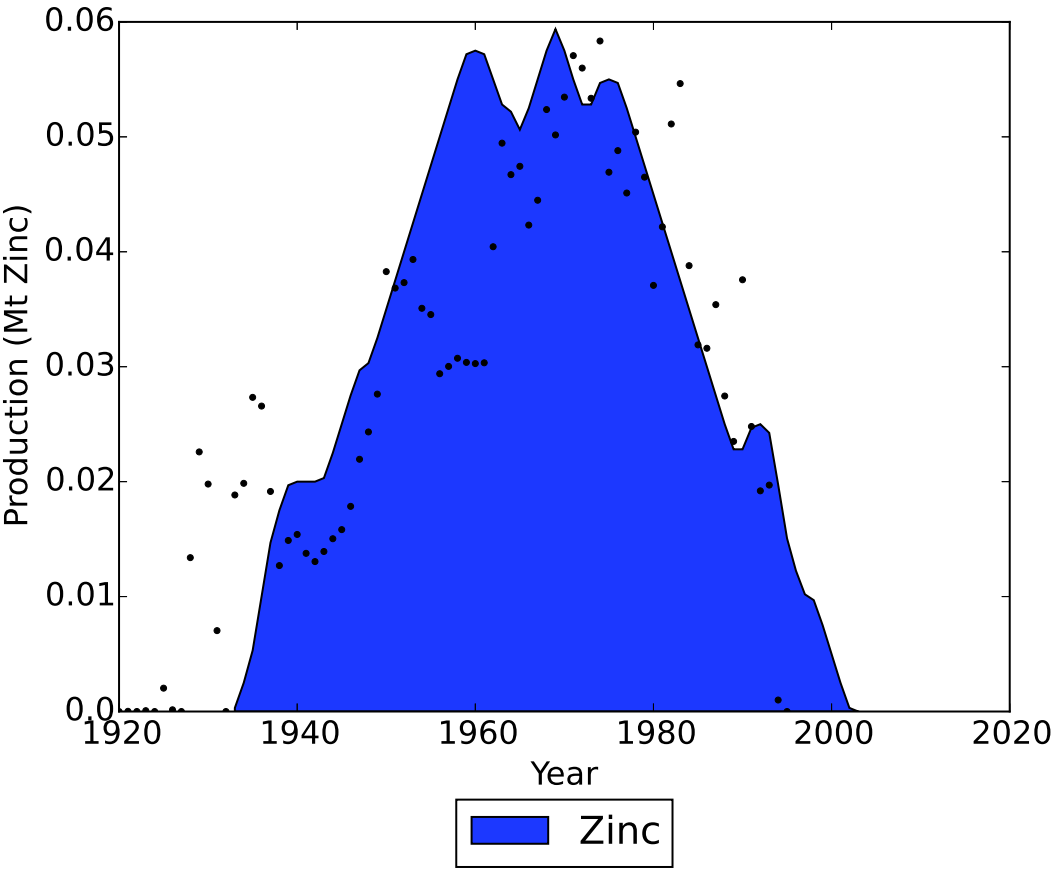

Figure 1.33: Zambia projections capped at 16

| Table 1.33: Peak years - All |      |           |           |
|------------------------------|------|-----------|-----------|
| Name                         | URR  | Peak Year | Peak Rate |
| Zinc                         | 2.38 | 1969      | 0.06      |
| Total                        | 2.38 | 1969      | 0.06      |

1.17.2 By Mineral

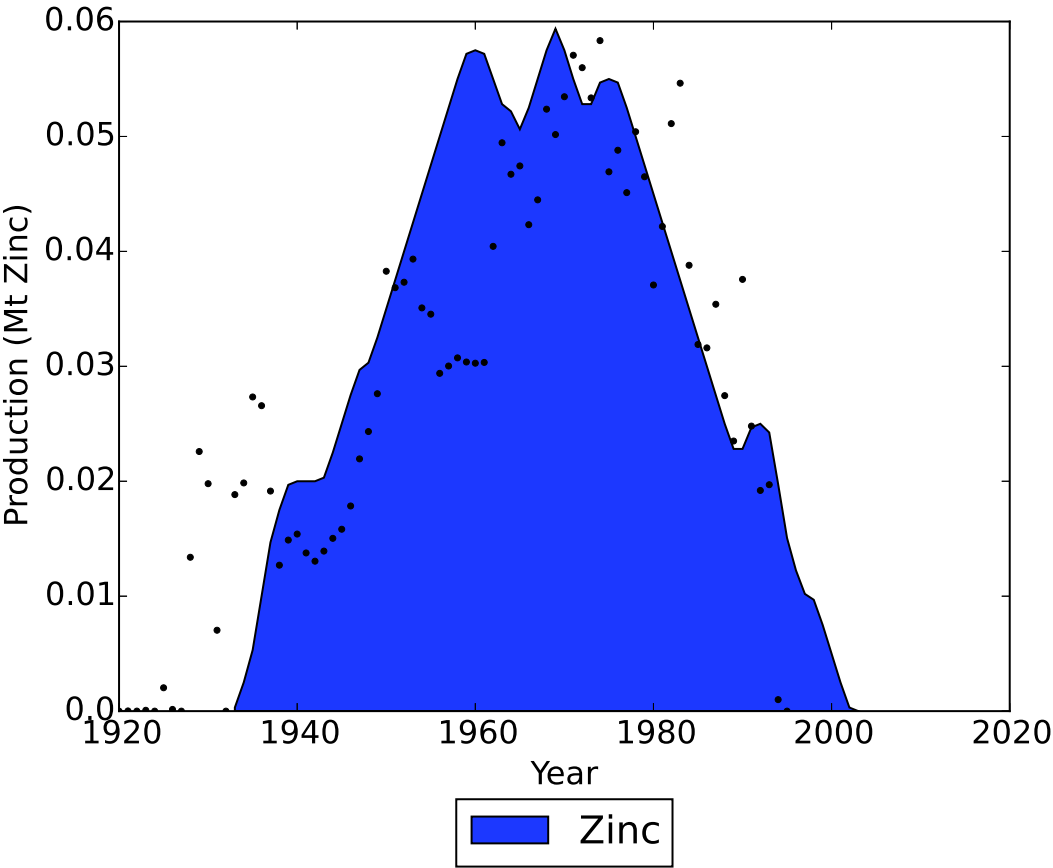

Figure 1.34: Zambia projection by mineral type

| Table 1.34: Peak years - Minerals |      |           |           |
|-----------------------------------|------|-----------|-----------|
| Name                              | URR  | Peak Year | Peak Rate |
| Zinc                              | 2.38 | 1969      | 0.06      |
| Total                             | 2.38 | 1969      | 0.06      |

1.18 Zimbabwe

1.18.1 All Projections

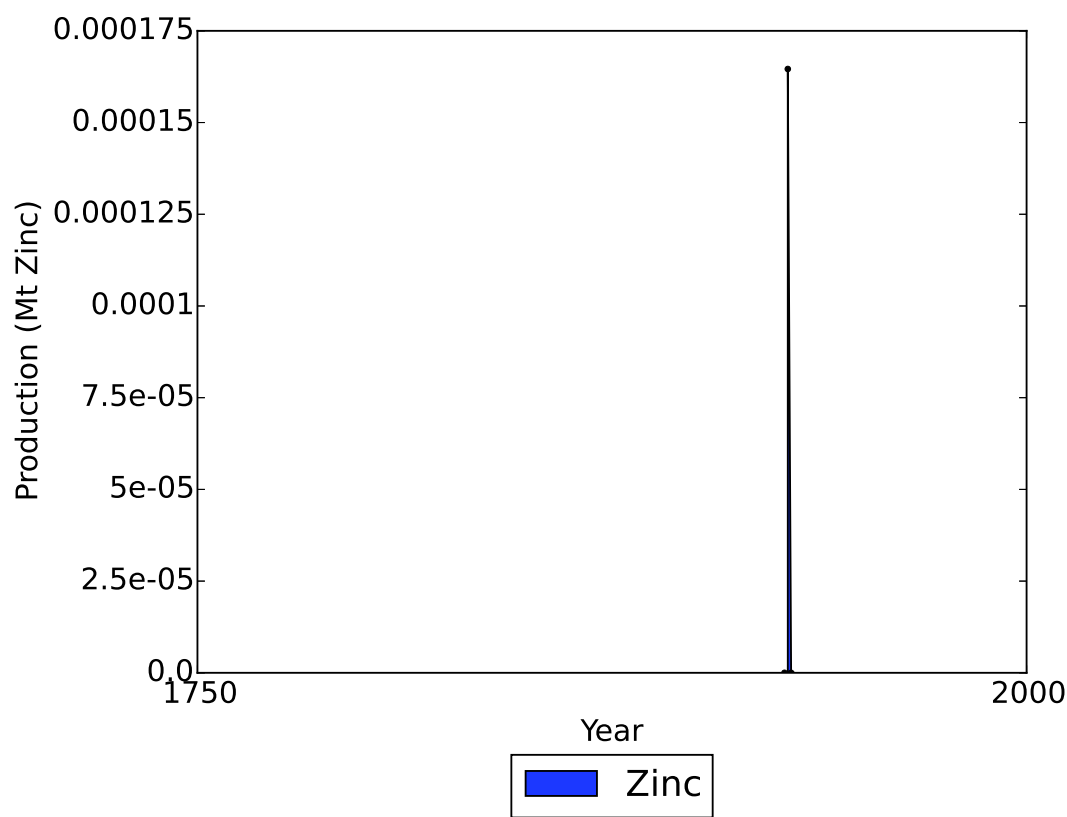

Figure 1.35: Zimbabwe projections capped at 16

Table 1.35: Peak years - All

| Name  | URR | Peak Year | Peak Rate |
|-------|-----|-----------|-----------|
| Zinc  | –   | 1928      | –         |
| Total | –   | 1928      | –         |

1.18.2 By Mineral

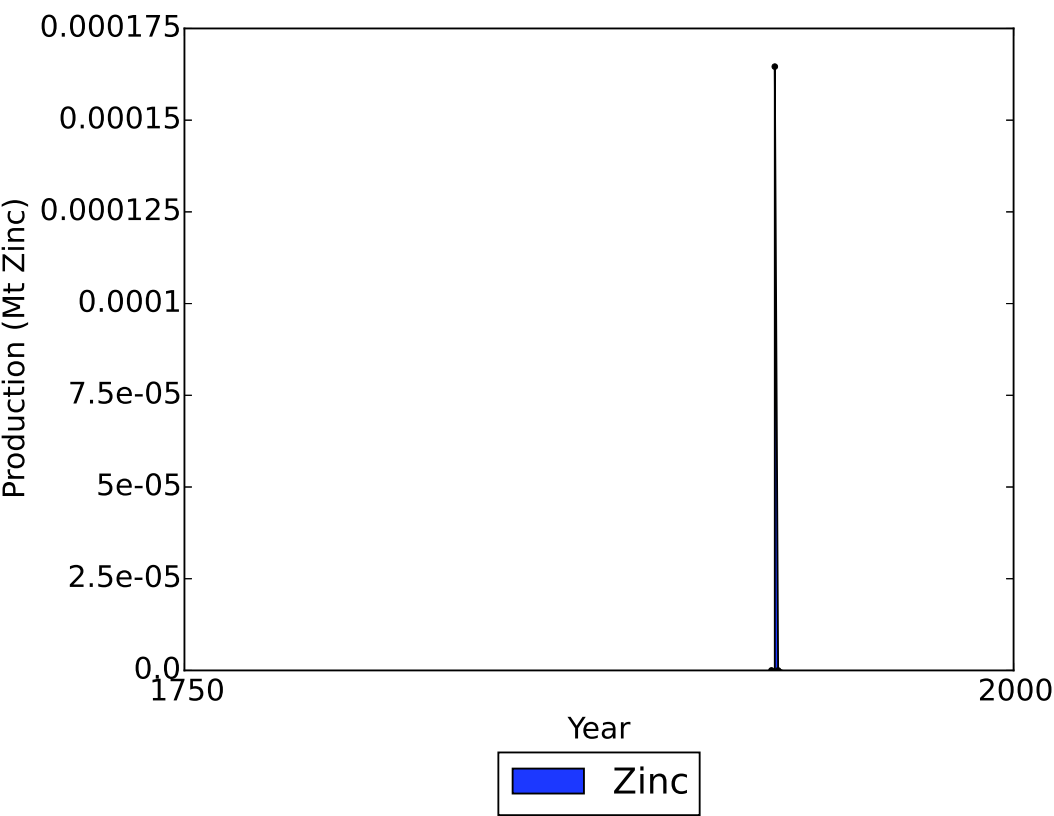

Figure 1.36: Zimbabwe projection by mineral type

| Table 1.36: Peak years - Minerals |     |           |           |
|-----------------------------------|-----|-----------|-----------|
| Name                              | URR | Peak Year | Peak Rate |
| Zinc                              | –   | 1928      | –         |
| Total                             | –   | 1928      | –         |

1.19 Total

1.19.1 By country

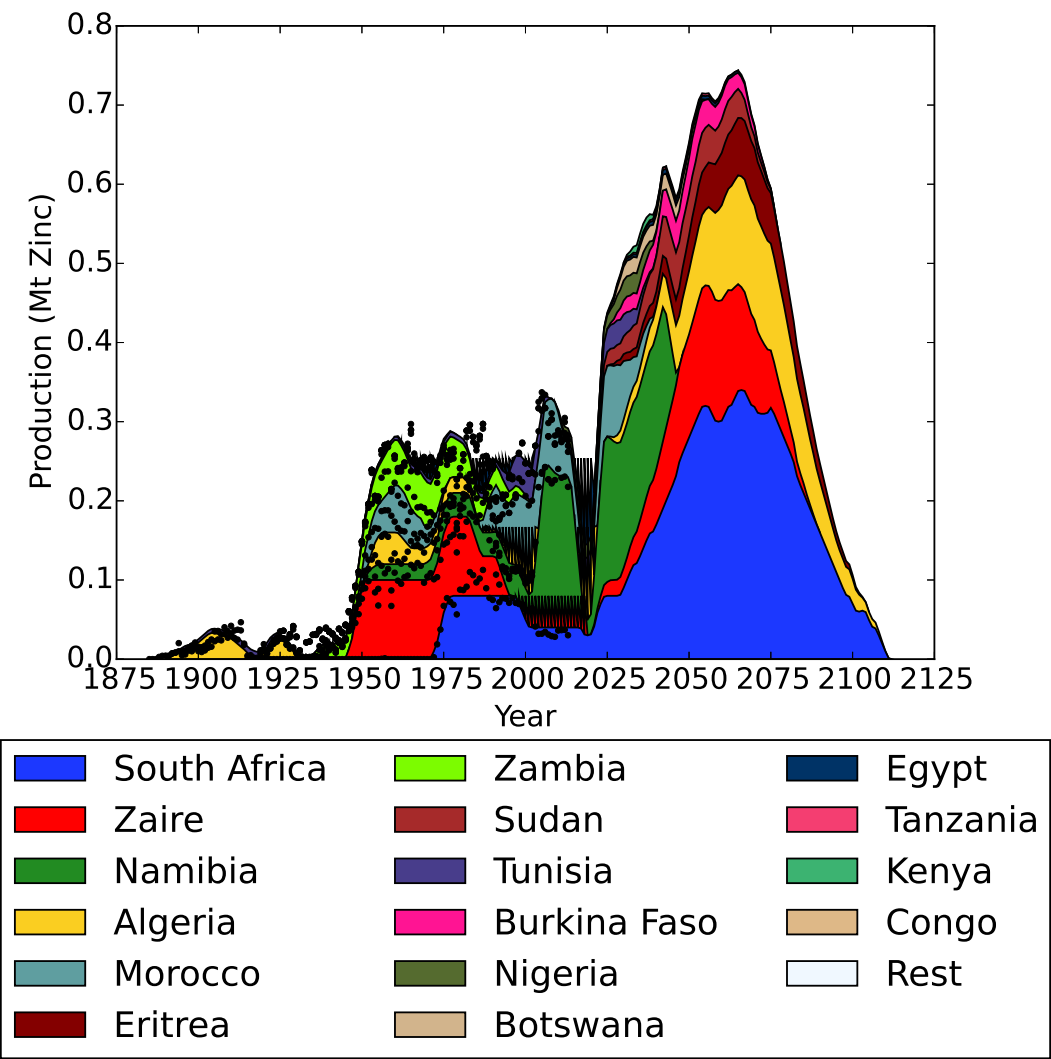

Figure 1.37: Africa projections by country

1.19.2 By mineral



Table 1.37: Peak years - All

| <b>Name</b>  | <b>URR</b>   | <b>Peak Year</b> | <b>Peak Rate</b> |
|--------------|--------------|------------------|------------------|
| South Africa | 20.14        | 2066             | 0.34             |
| Zaire        | 9.41         | 2057             | 0.15             |
| Namibia      | 7.81         | 2007             | 0.2              |
| Algeria      | 7.53         | 2069             | 0.14             |
| Morocco      | 4.48         | 2001             | 0.12             |
| Eritrea      | 2.85         | 2068             | 0.07             |
| Zambia       | 2.38         | 1969             | 0.06             |
| Sudan        | 1.88         | 2046             | 0.06             |
| Tunisia      | 1.39         | 1999             | 0.04             |
| Burkina Faso | 1.27         | 2051             | 0.05             |
| Nigeria      | 0.52         | 2031             | 0.03             |
| Botswana     | 0.45         | 2032             | 0.02             |
| Egypt        | 0.2          | 2048             | 0.01             |
| Tanzania     | 0.1          | 2042             | –                |
| Kenya        | 0.07         | 2035             | 0.01             |
| Congo        | 0.07         | 1965             | 0.01             |
| Angola       | –            | 1951             | –                |
| Zimbabwe     | –            | 1928             | –                |
| <b>Total</b> | <b>60.55</b> | <b>2065</b>      | <b>0.74</b>      |

Table 1.38: Peak years - Minerals

| <b>Name</b>  | <b>URR</b>   | <b>Peak Year</b> | <b>Peak Rate</b> |
|--------------|--------------|------------------|------------------|
| Zinc Zinc    | 60.55        | 2065             | 0.74             |
| <b>Total</b> | <b>60.55</b> | <b>2065</b>      | <b>0.74</b>      |

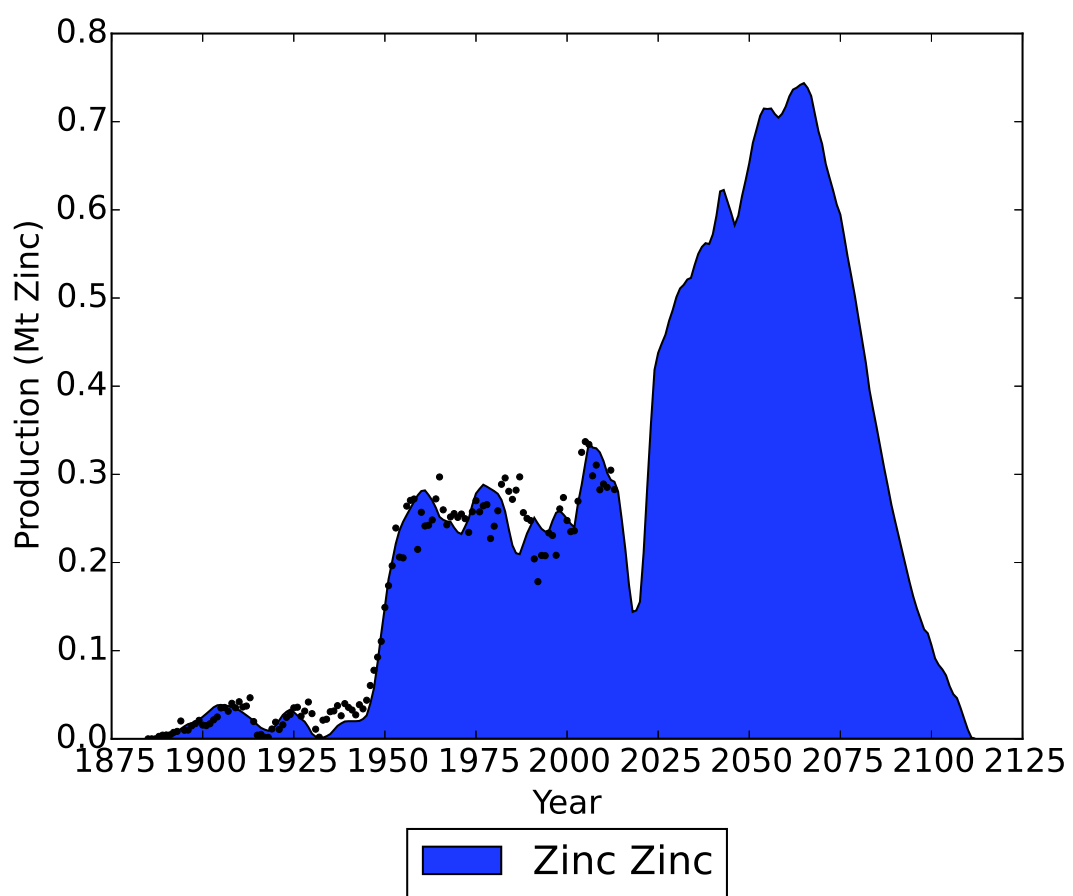

Figure 1.38: Africa projection by mineral type

## Chapter 2

# Asia

### 2.1 Australia

#### 2.1.1 All Projections

Table 2.1: Peak years - All

| Name         | URR           | Peak Year   | Peak Rate  |
|--------------|---------------|-------------|------------|
| Zinc         | 153.66        | 2030        | 1.9        |
| <b>Total</b> | <b>153.66</b> | <b>2030</b> | <b>1.9</b> |

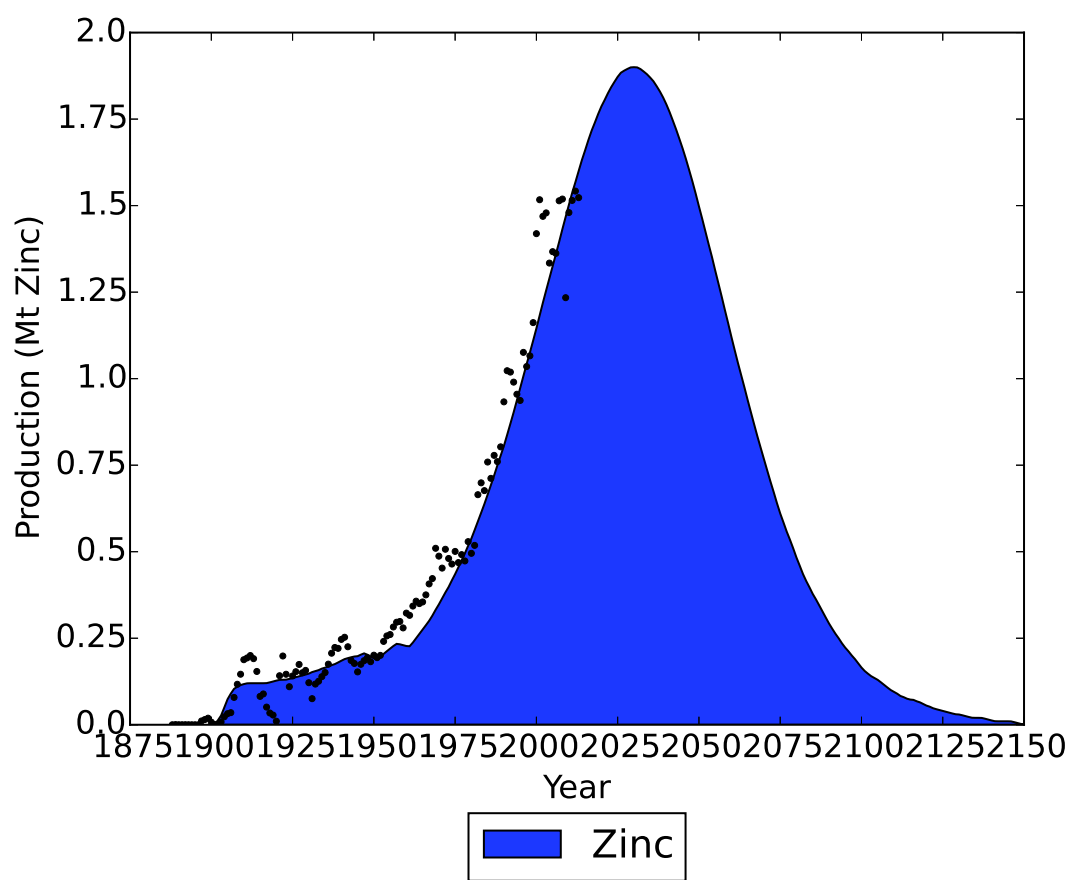

Figure 2.1: Australia projections capped at 16

2.1.2 By Mineral

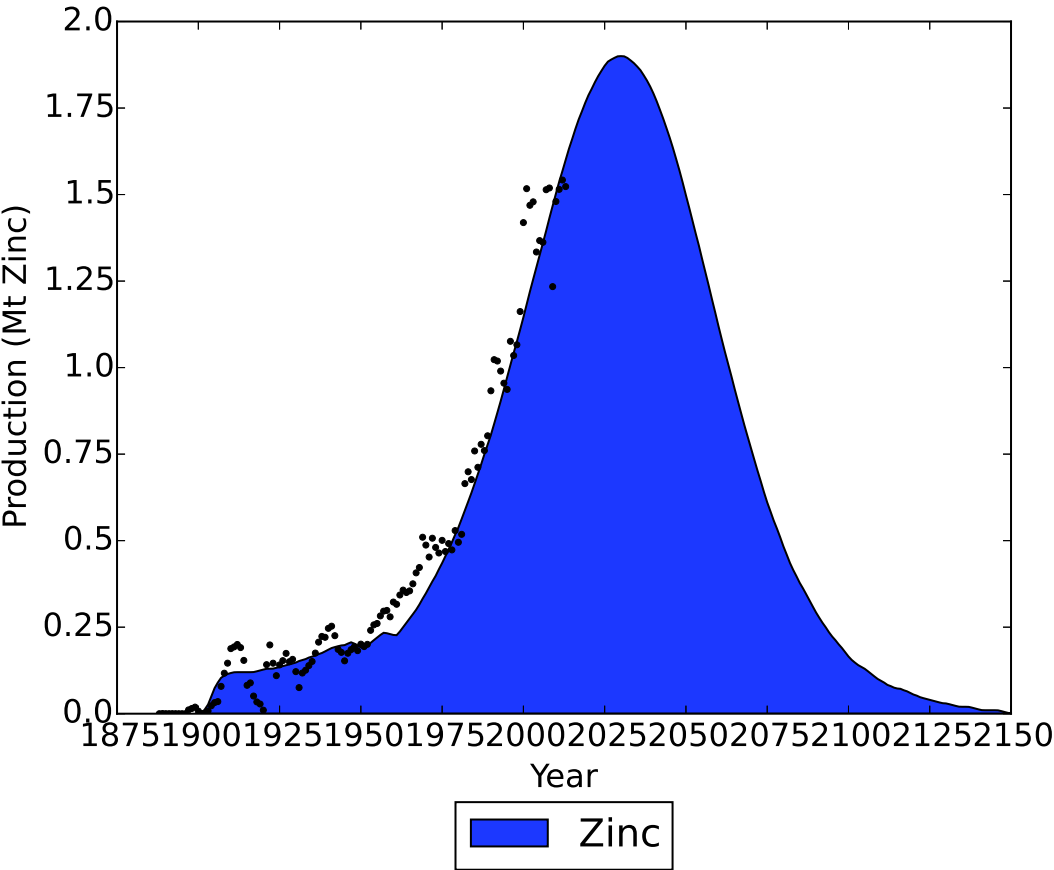

Figure 2.2: Australia projection by mineral type

| Table 2.2: Peak years - Minerals |        |           |           |
|----------------------------------|--------|-----------|-----------|
| Name                             | URR    | Peak Year | Peak Rate |
| Zinc                             | 153.66 | 2030      | 1.9       |
| Total                            | 153.66 | 2030      | 1.9       |

2.2 Burma

2.2.1 All Projections

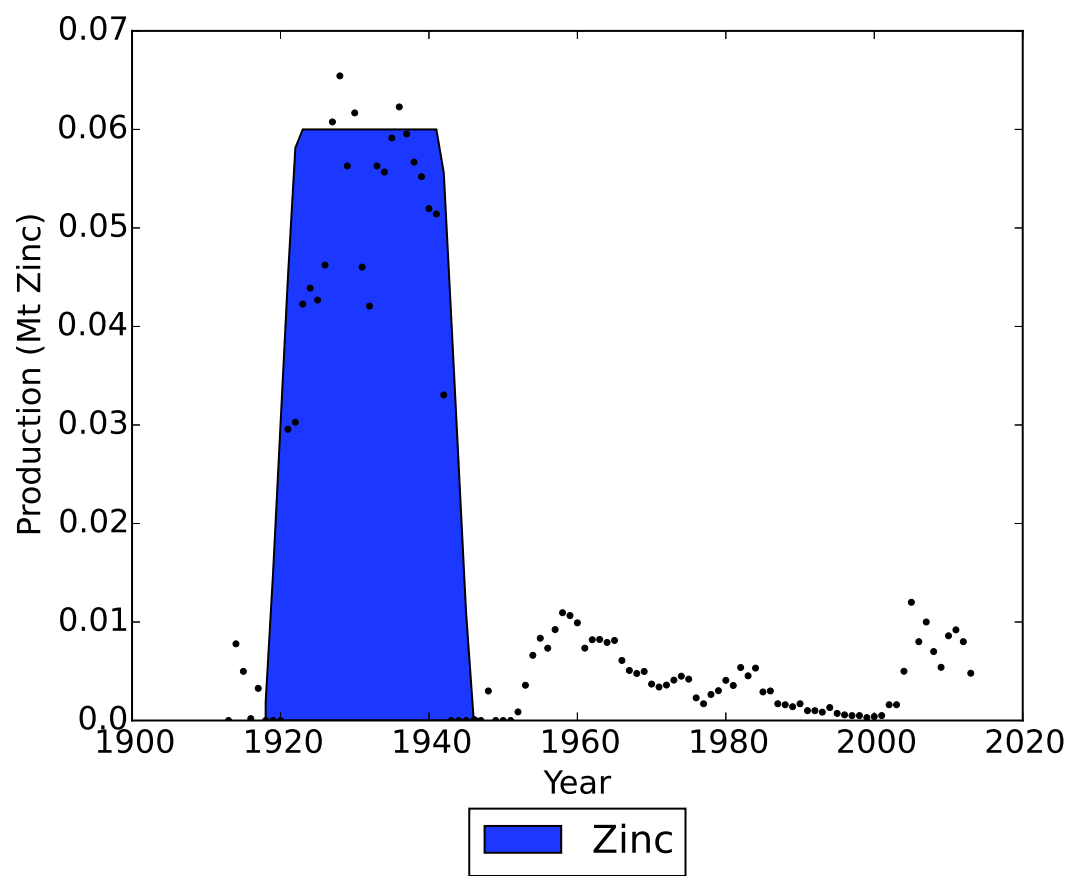

Figure 2.3: Burma projections capped at 16

| Table 2.3: Peak years - All |      |           |           |
|-----------------------------|------|-----------|-----------|
| Name                        | URR  | Peak Year | Peak Rate |
| Zinc                        | 1.42 | 1923      | 0.06      |
| Total                       | 1.42 | 1923      | 0.06      |

2.2.2 By Mineral

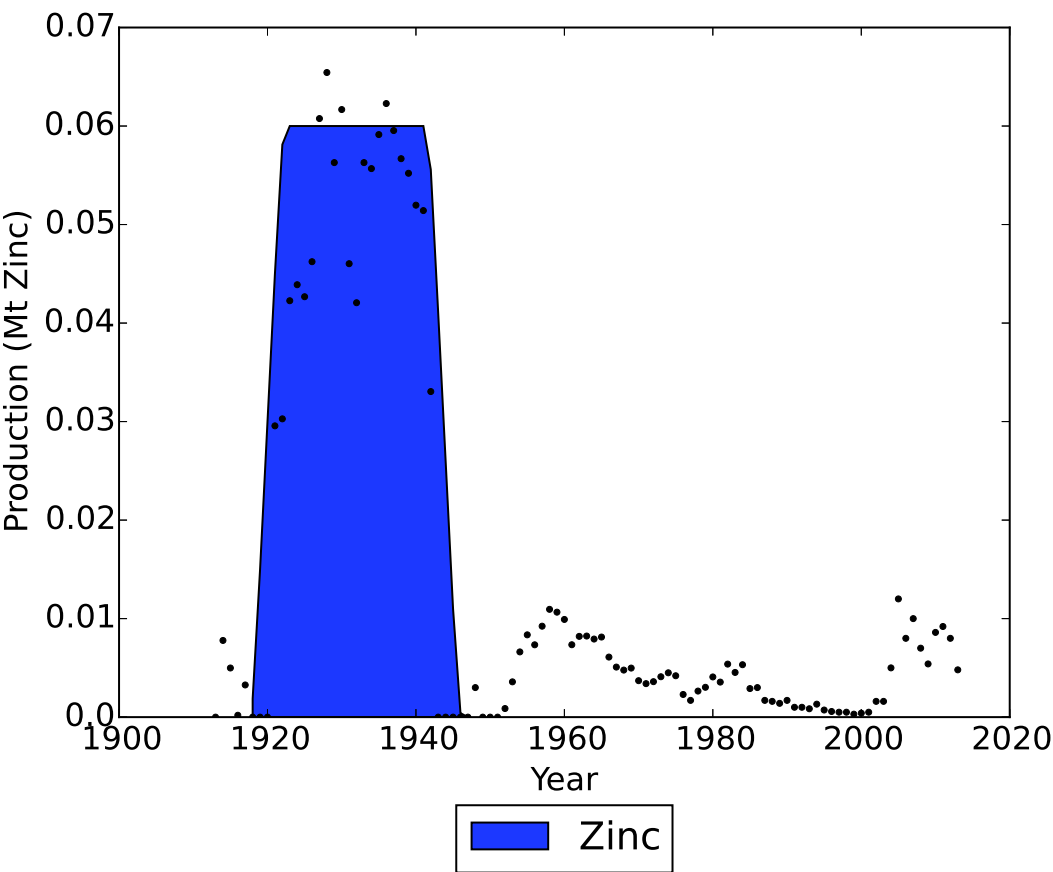

Figure 2.4: Burma projection by mineral type

| Table 2.4: Peak years - Minerals |      |           |           |
|----------------------------------|------|-----------|-----------|
| Name                             | URR  | Peak Year | Peak Rate |
| Zinc                             | 1.42 | 1923      | 0.06      |
| Total                            | 1.42 | 1923      | 0.06      |

2.3 China

2.3.1 All Projections

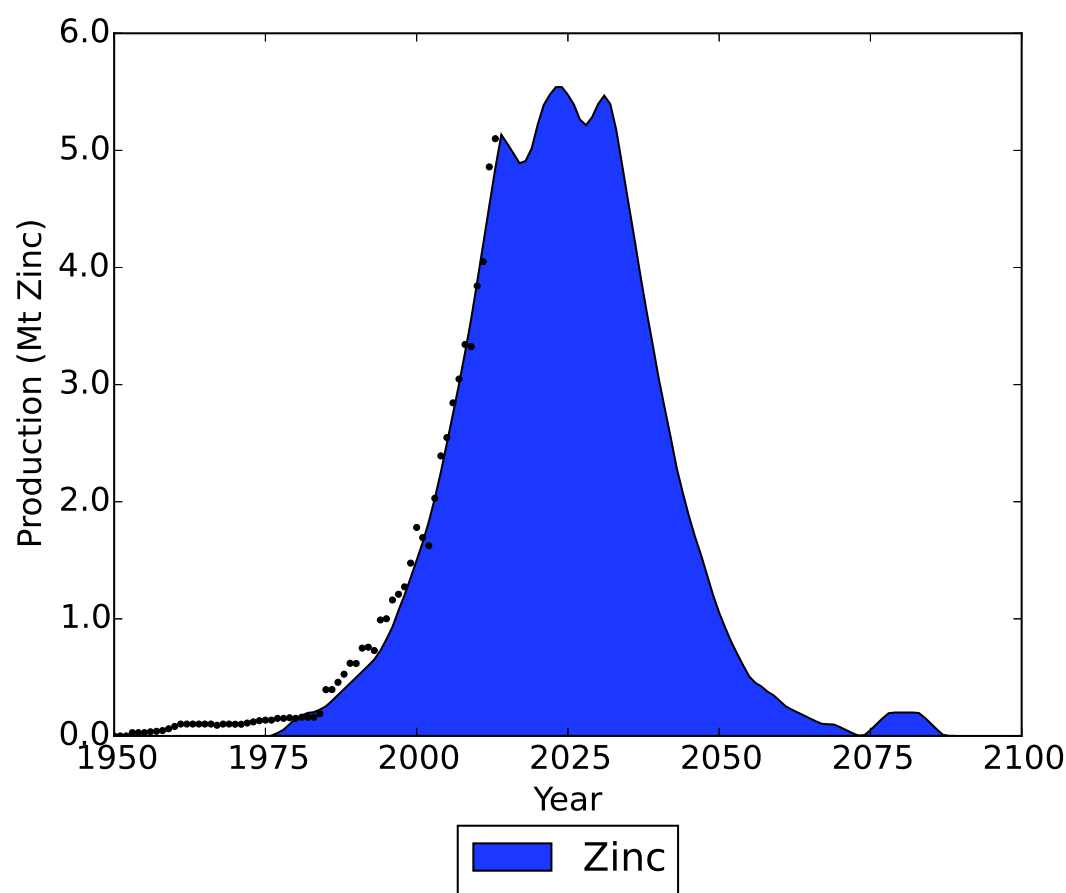

Figure 2.5: China projections capped at 16

| Table 2.5: Peak years - All |               |             |             |
|-----------------------------|---------------|-------------|-------------|
| Name                        | URR           | Peak Year   | Peak Rate   |
| Zinc                        | 213.22        | 2023        | 5.54        |
| <b>Total</b>                | <b>213.22</b> | <b>2023</b> | <b>5.54</b> |



2.3.2 By Mineral

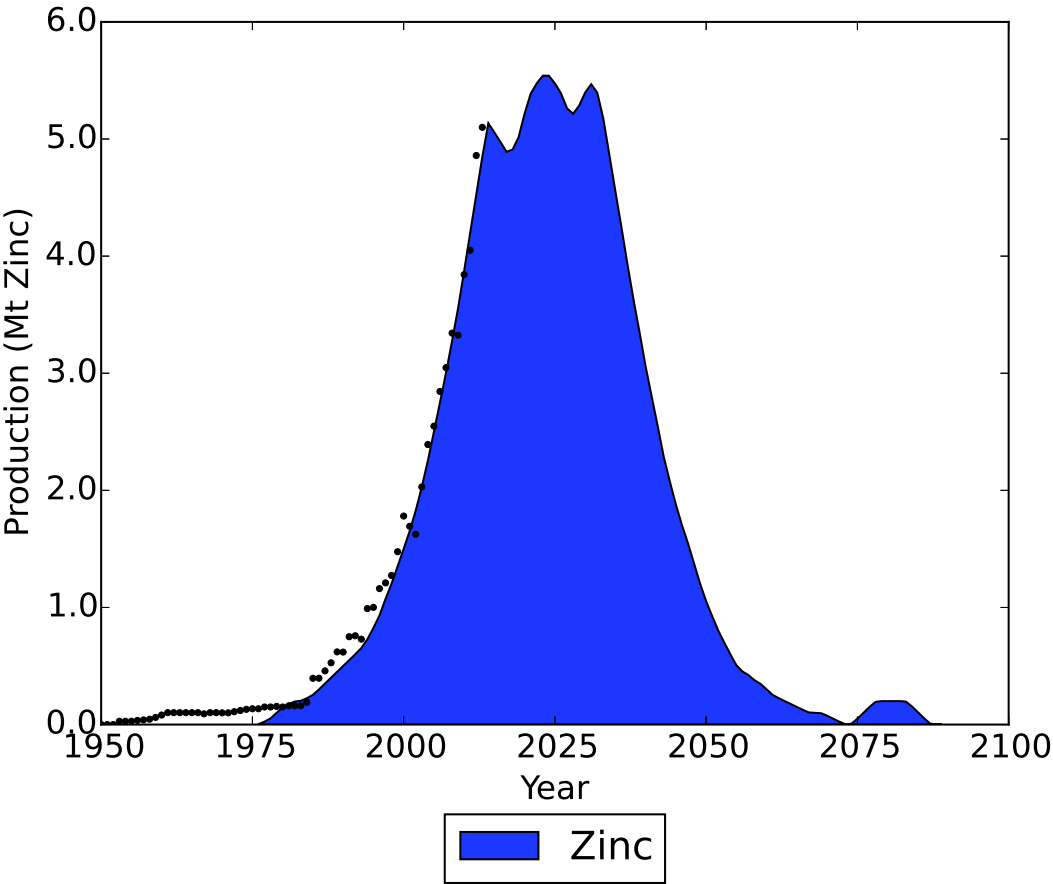

Figure 2.6: China projection by mineral type

| Table 2.6: Peak years - Minerals |        |           |           |
|----------------------------------|--------|-----------|-----------|
| Name                             | URR    | Peak Year | Peak Rate |
| Zinc                             | 213.22 | 2023      | 5.54      |
| Total                            | 213.22 | 2023      | 5.54      |

2.4 India

2.4.1 All Projections

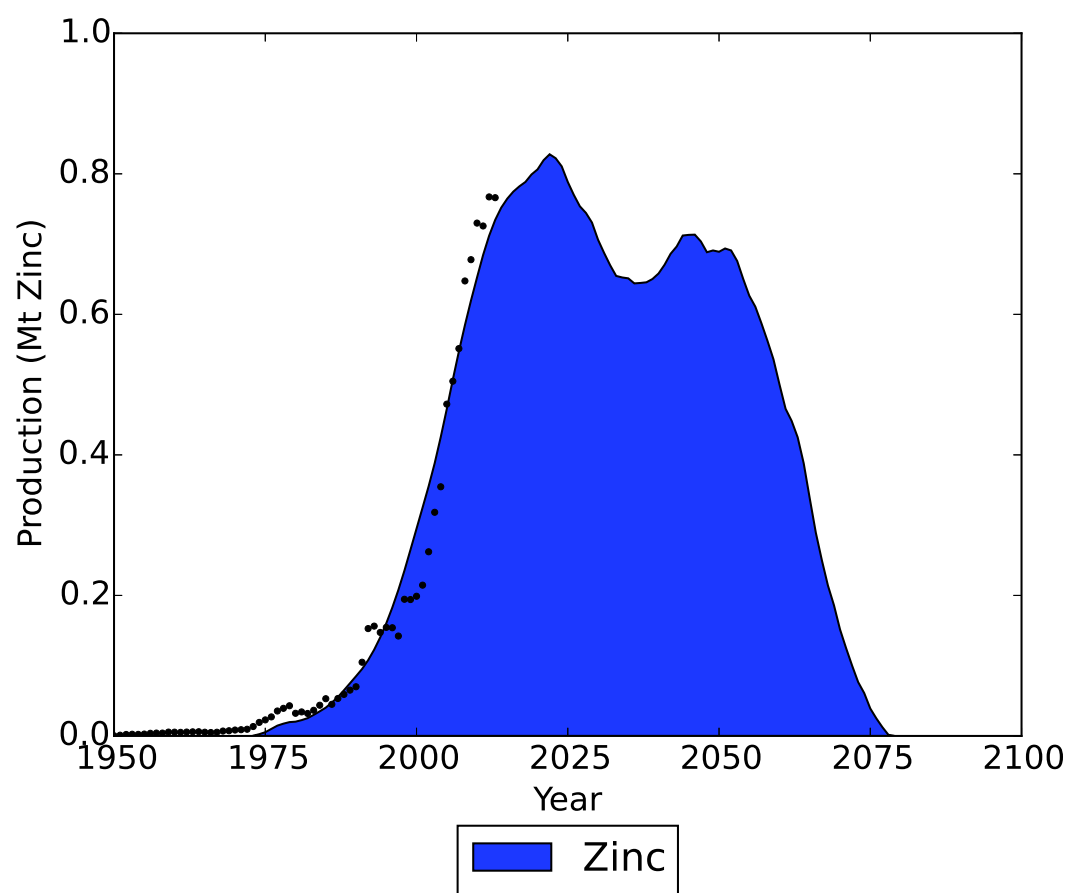

Figure 2.7: India projections capped at 16

| Table 2.7: Peak years - All |       |           |           |
|-----------------------------|-------|-----------|-----------|
| Name                        | URR   | Peak Year | Peak Rate |
| Zinc                        | 45.88 | 2022      | 0.83      |
| Total                       | 45.88 | 2022      | 0.83      |

2.4.2 By Mineral

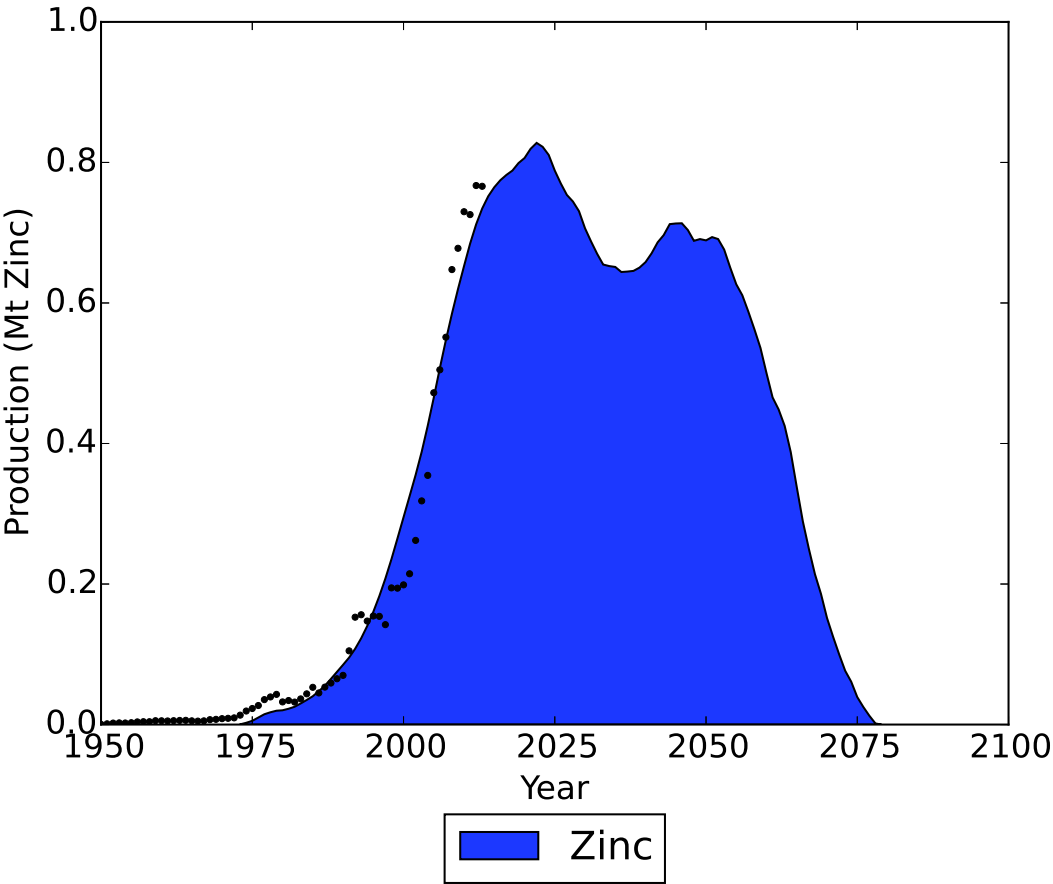

Figure 2.8: India projection by mineral type

| Table 2.8: Peak years - Minerals |              |             |             |
|----------------------------------|--------------|-------------|-------------|
| Name                             | URR          | Peak Year   | Peak Rate   |
| Zinc                             | 45.88        | 2022        | 0.83        |
| <b>Total</b>                     | <b>45.88</b> | <b>2022</b> | <b>0.83</b> |

# 2.5 Indonesia

## 2.5.1 All Projections

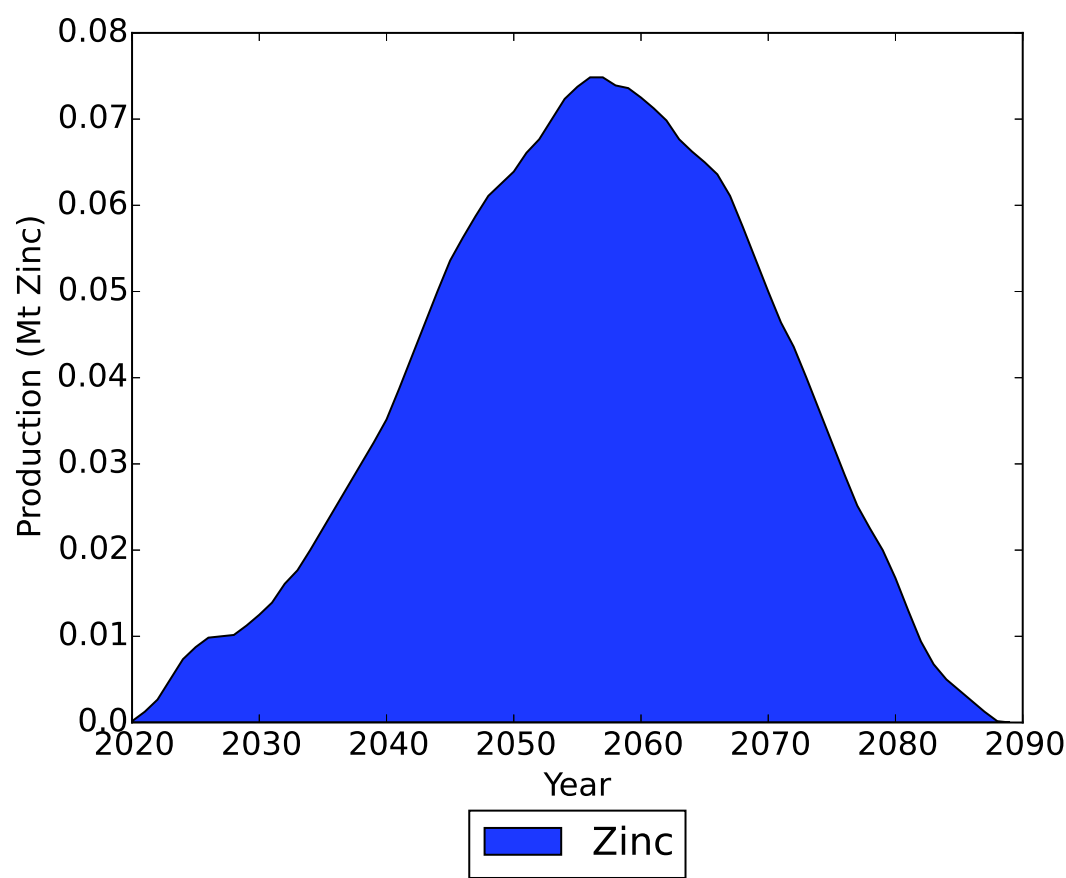

Figure 2.9: Indonesia projections capped at 16

| Table 2.9: Peak years - All |      |           |           |
|-----------------------------|------|-----------|-----------|
| Name                        | URR  | Peak Year | Peak Rate |
| Zinc                        | 2.55 | 2056      | 0.07      |
| Total                       | 2.55 | 2056      | 0.07      |

2.5.2 By Mineral

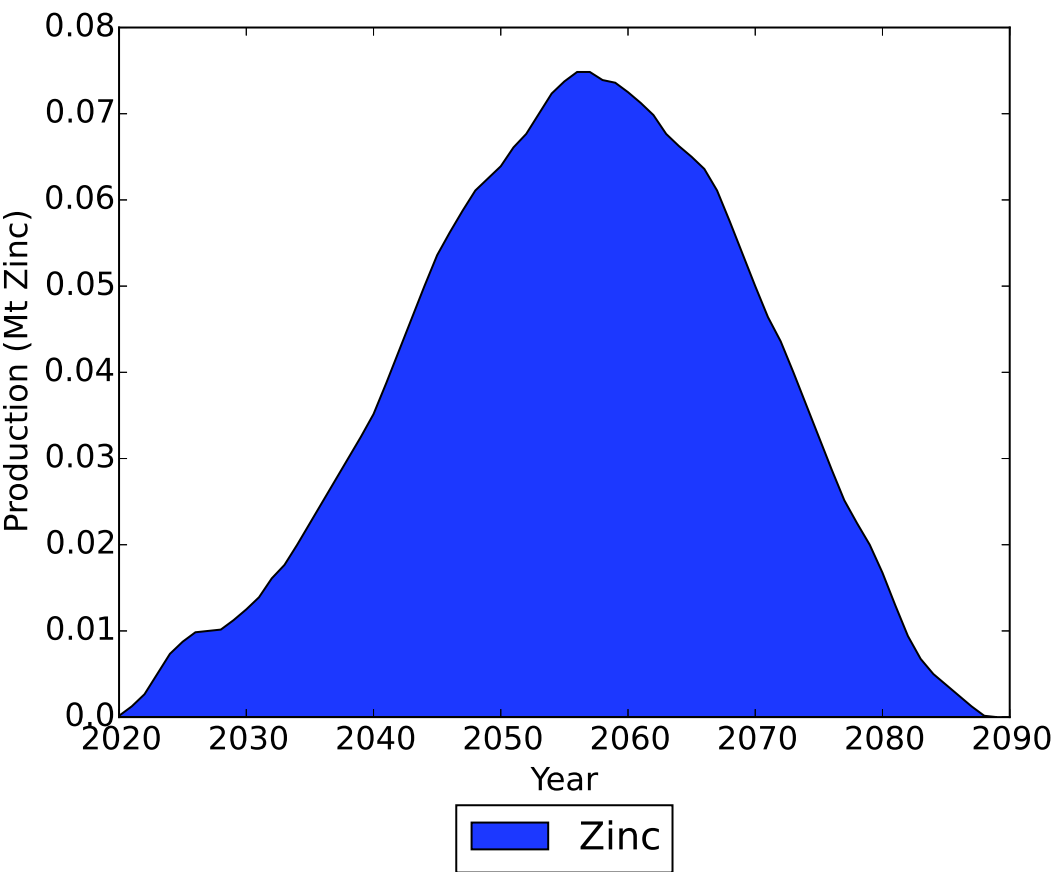

Figure 2.10: Indonesia projection by mineral type

| Table 2.10: Peak years - Minerals |      |           |           |
|-----------------------------------|------|-----------|-----------|
| Name                              | URR  | Peak Year | Peak Rate |
| Zinc                              | 2.55 | 2056      | 0.07      |
| Total                             | 2.55 | 2056      | 0.07      |

2.6 Iran

2.6.1 All Projections

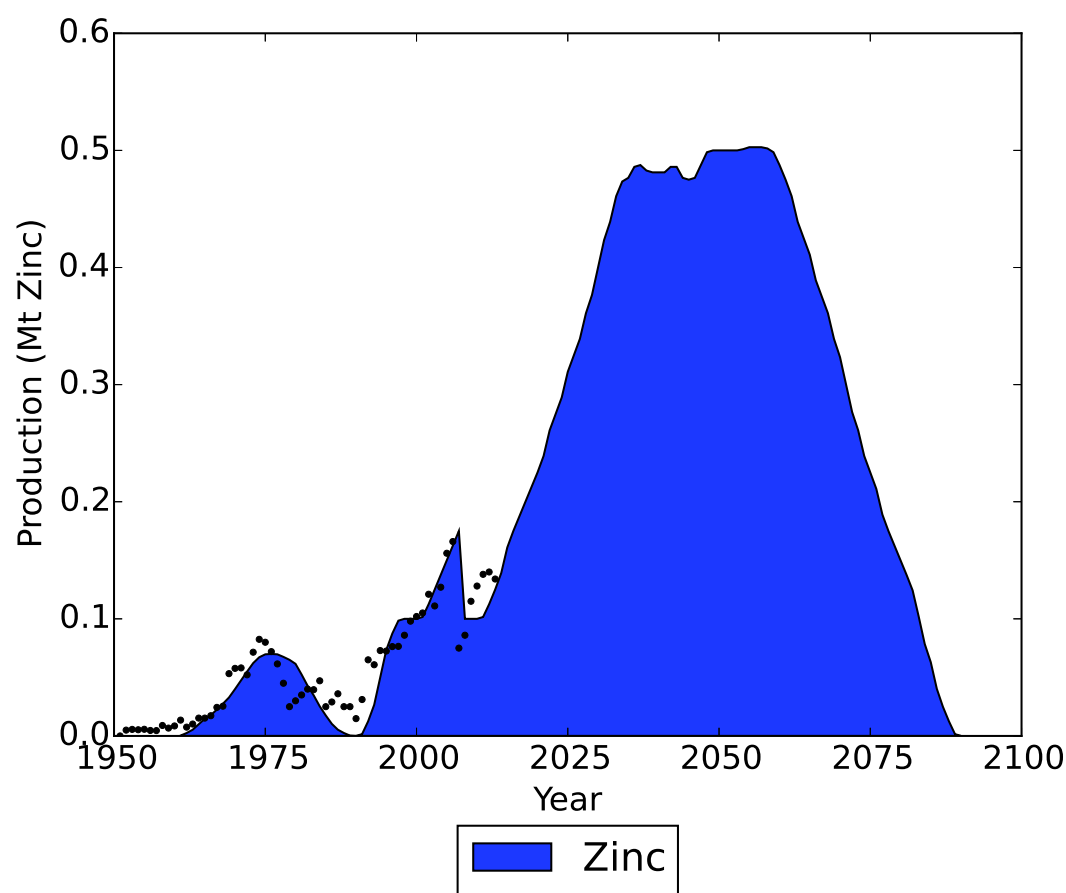

Figure 2.11: Iran projections capped at 16

| Table 2.11: Peak years - All |              |             |            |
|------------------------------|--------------|-------------|------------|
| Name                         | URR          | Peak Year   | Peak Rate  |
| Zinc                         | 29.06        | 2055        | 0.5        |
| <b>Total</b>                 | <b>29.06</b> | <b>2055</b> | <b>0.5</b> |

2.6.2 By Mineral

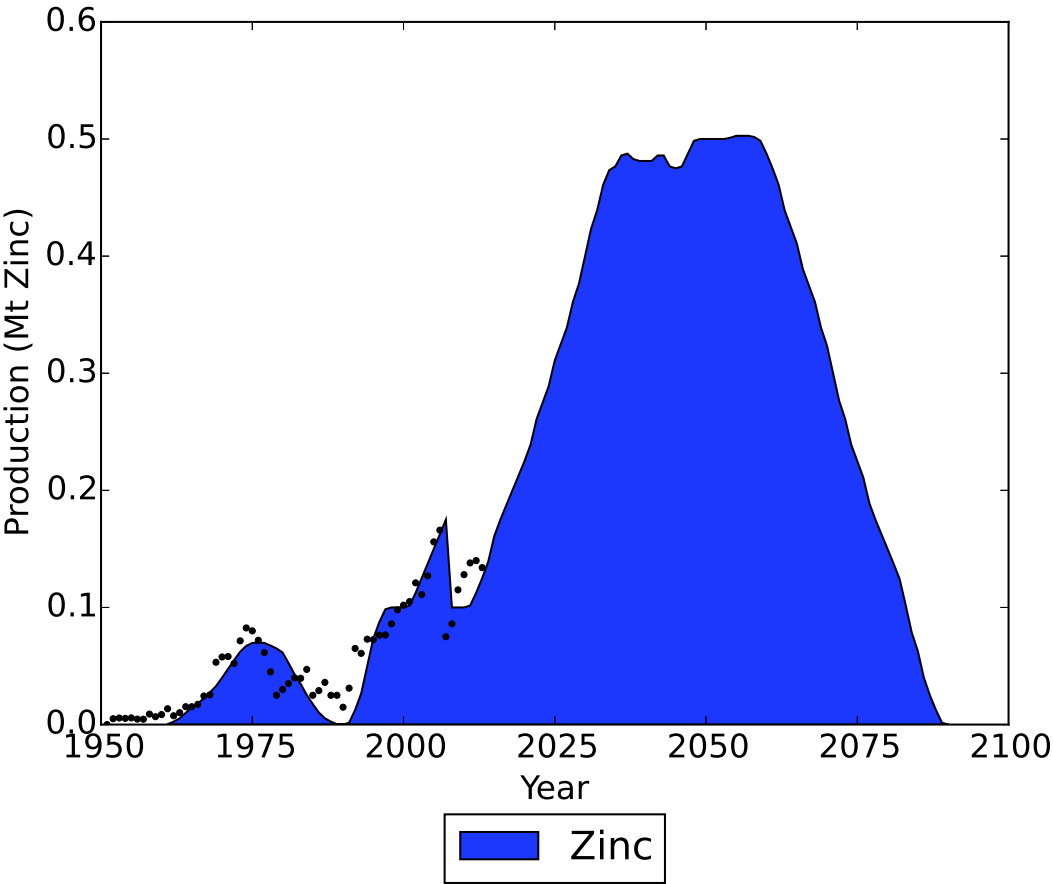

Figure 2.12: Iran projection by mineral type

| Table 2.12: Peak years - Minerals |       |           |           |
|-----------------------------------|-------|-----------|-----------|
| Name                              | URR   | Peak Year | Peak Rate |
| Zinc                              | 29.06 | 2055      | 0.5       |
| Total                             | 29.06 | 2055      | 0.5       |

2.7 Japan

2.7.1 All Projections

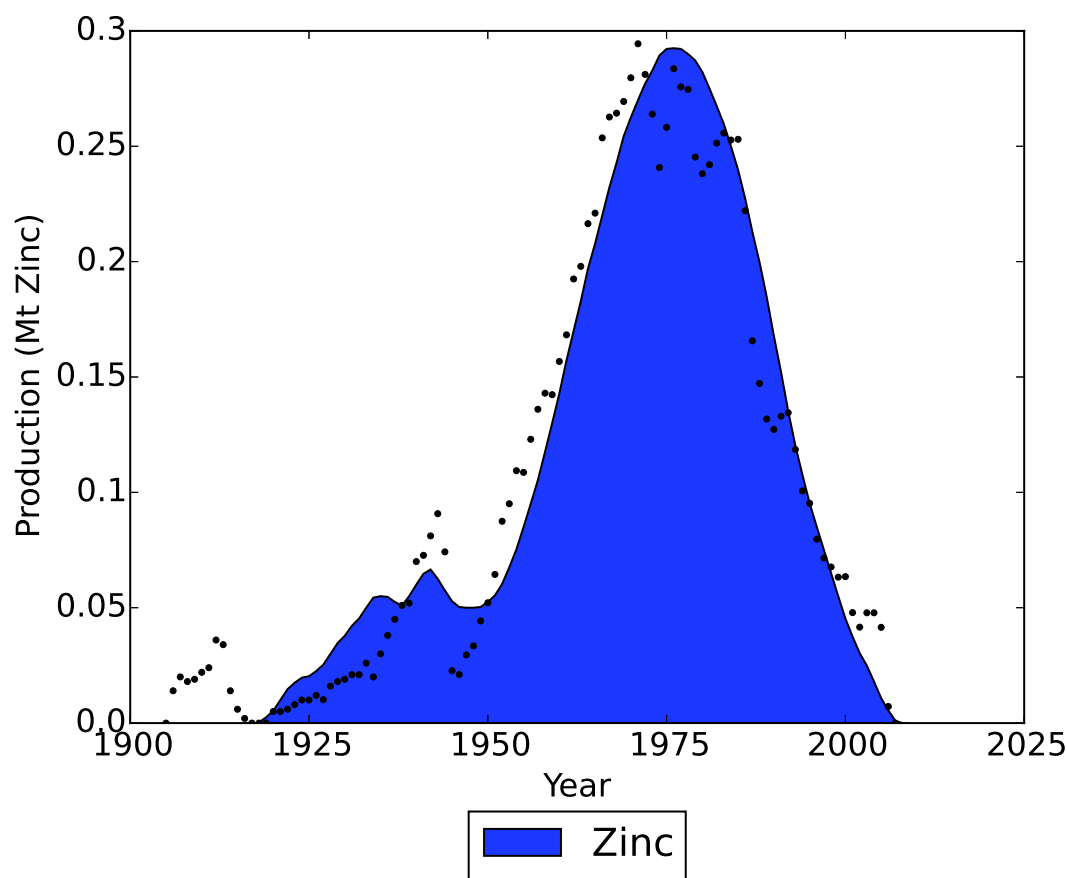

Figure 2.13: Japan projections capped at 16

Table 2.13: Peak years - All

| Name  | URR   | Peak Year | Peak Rate |
|-------|-------|-----------|-----------|
| Zinc  | 10.58 | 1976      | 0.29      |
| Total | 10.58 | 1976      | 0.29      |



2.7.2 By Mineral

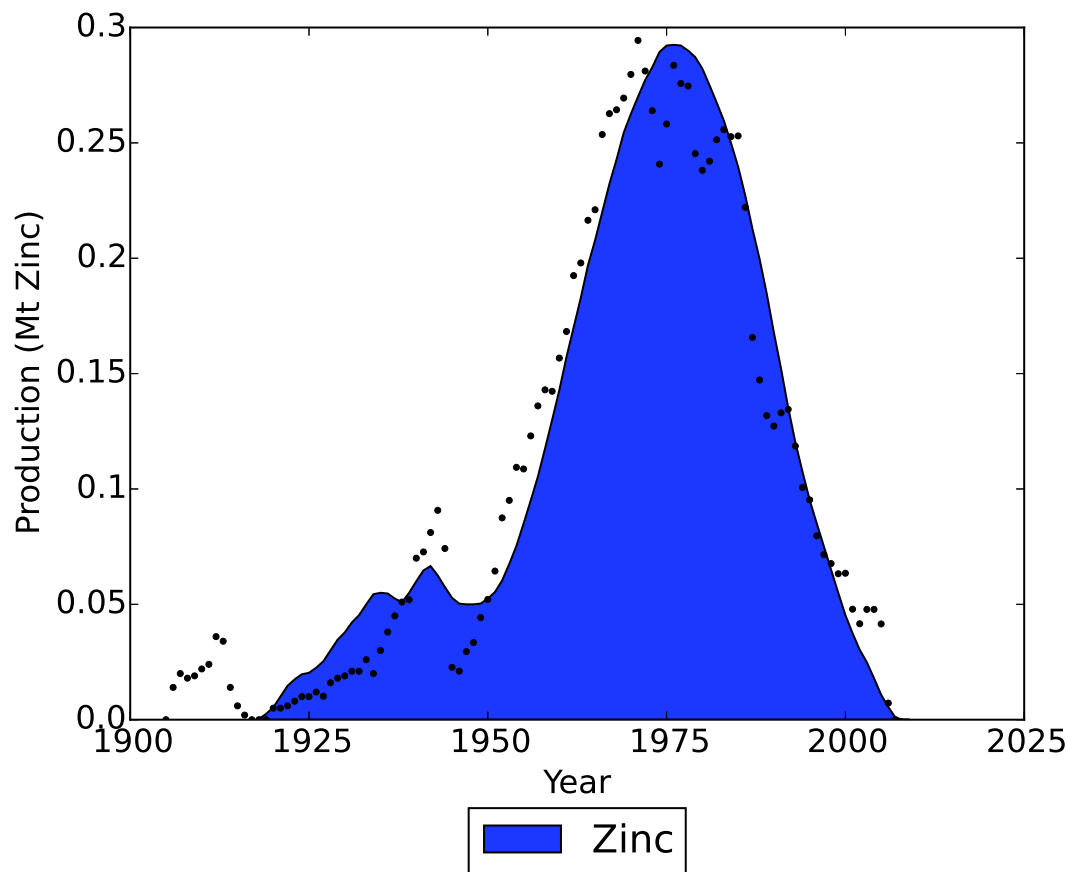

Figure 2.14: Japan projection by mineral type

| Table 2.14: Peak years - Minerals |       |           |           |
|-----------------------------------|-------|-----------|-----------|
| Name                              | URR   | Peak Year | Peak Rate |
| Zinc                              | 10.58 | 1976      | 0.29      |
| Total                             | 10.58 | 1976      | 0.29      |

2.8 Laos

2.8.1 All Projections

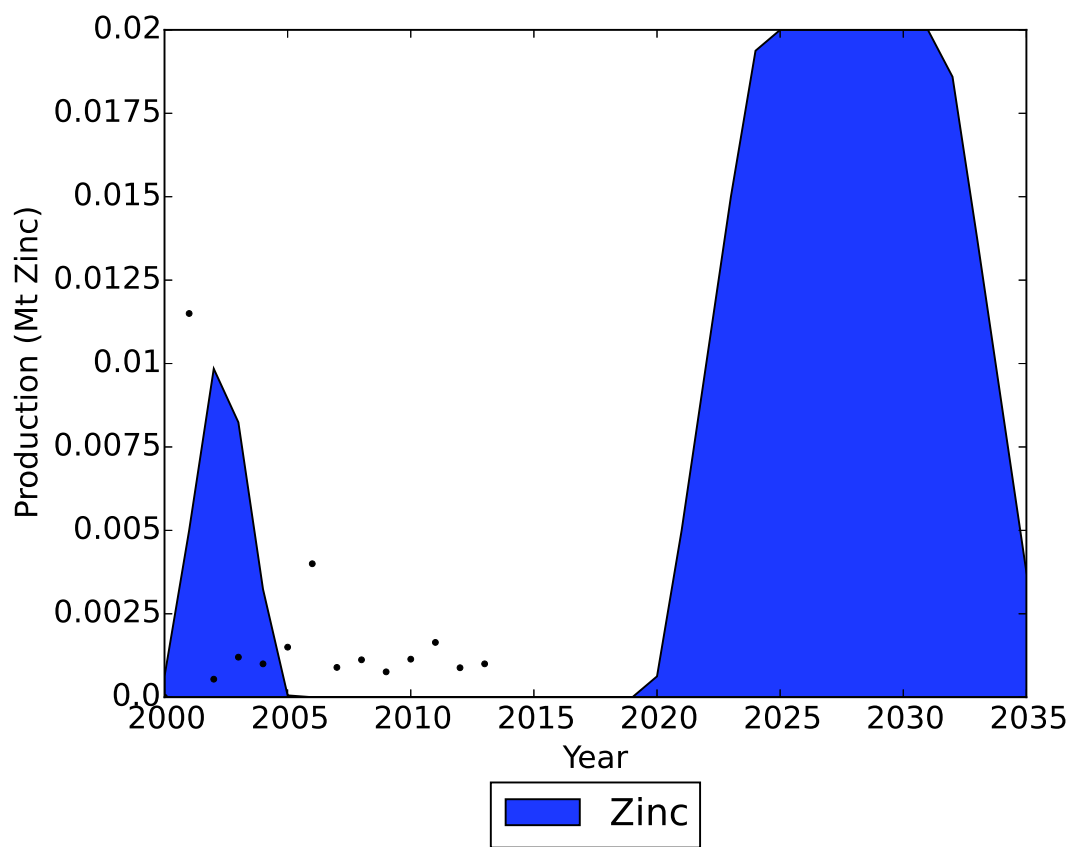

Figure 2.15: Laos projections capped at 16

Table 2.15: Peak years - All

| Name  | URR  | Peak Year | Peak Rate |
|-------|------|-----------|-----------|
| Zinc  | 0.26 | 2025      | 0.02      |
| Total | 0.26 | 2025      | 0.02      |

2.8.2 By Mineral

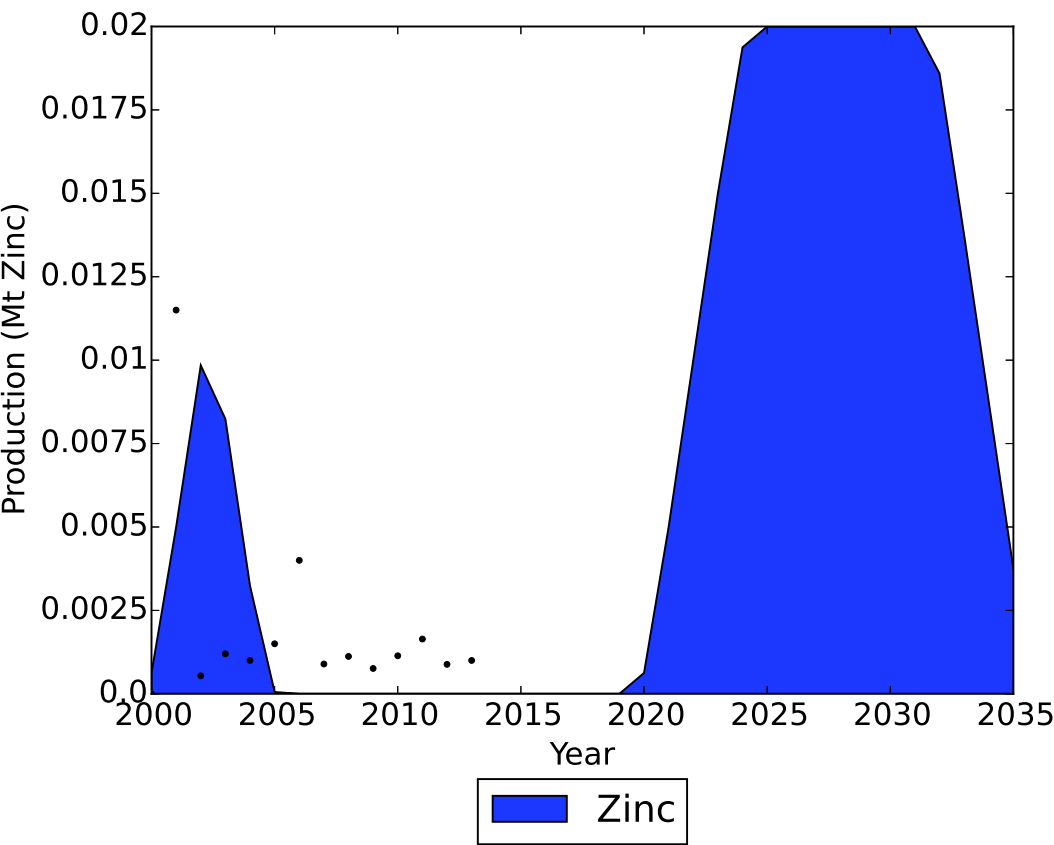

Figure 2.16: Laos projection by mineral type

Table 2.16: Peak years - Minerals

| Name  | URR  | Peak Year | Peak Rate |
|-------|------|-----------|-----------|
| Zinc  | 0.26 | 2025      | 0.02      |
| Total | 0.26 | 2025      | 0.02      |

2.9 Mongolia

2.9.1 All Projections

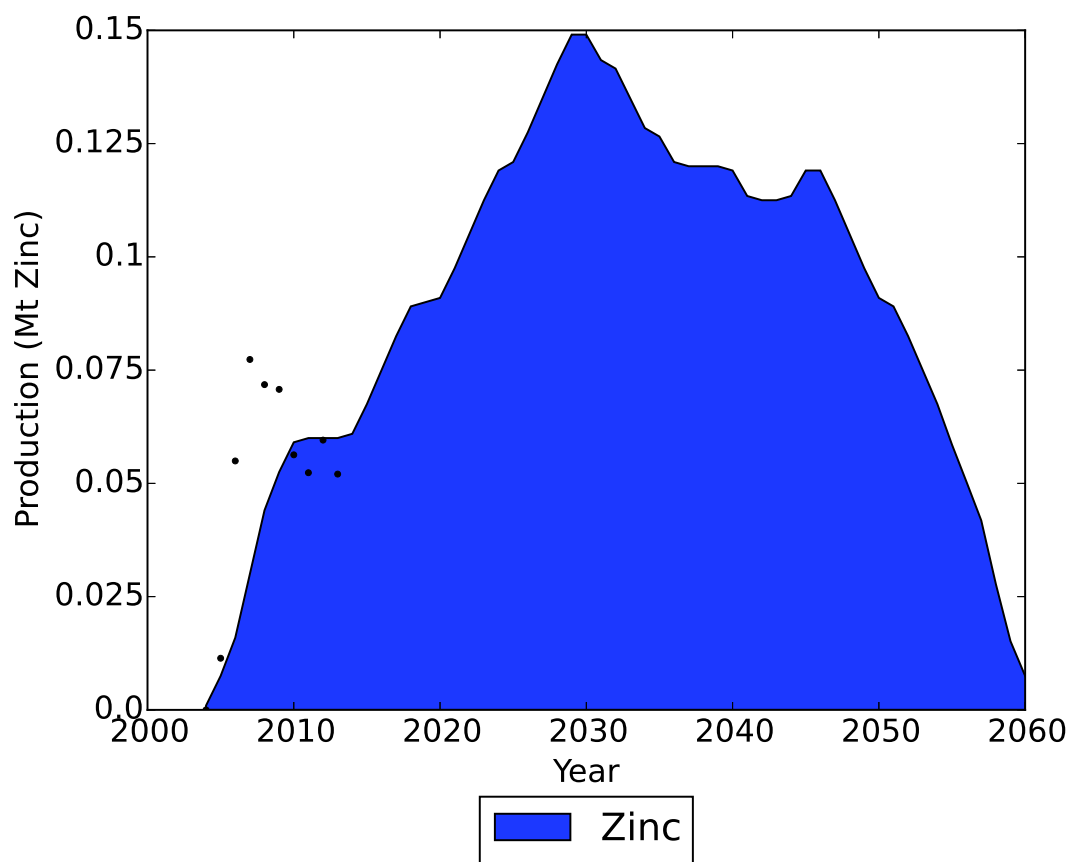

Figure 2.17: Mongolia projections capped at 16

| Table 2.17: Peak years - All |      |           |           |
|------------------------------|------|-----------|-----------|
| Name                         | URR  | Peak Year | Peak Rate |
| Zinc                         | 5.09 | 2029      | 0.15      |
| Total                        | 5.09 | 2029      | 0.15      |

2.9.2 By Mineral

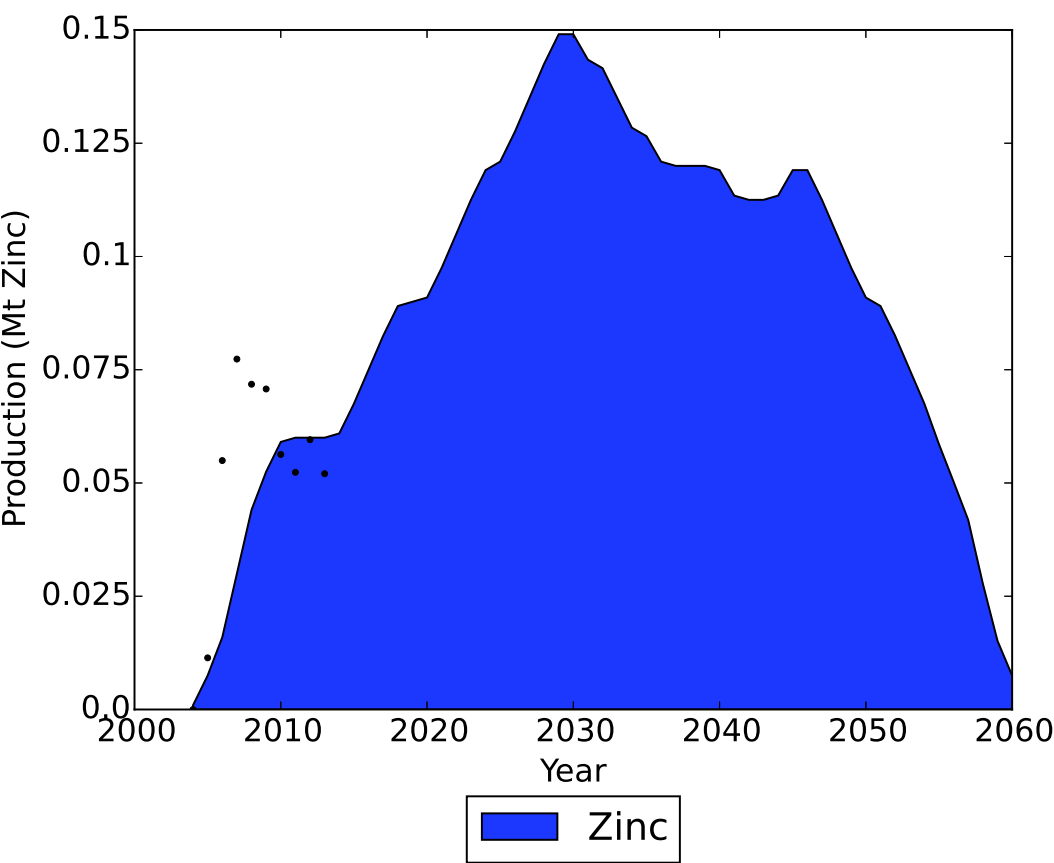

Figure 2.18: Mongolia projection by mineral type

| Table 2.18: Peak years - Minerals |      |           |           |
|-----------------------------------|------|-----------|-----------|
| Name                              | URR  | Peak Year | Peak Rate |
| Zinc                              | 5.09 | 2029      | 0.15      |
| Total                             | 5.09 | 2029      | 0.15      |

2.10 Nepal

2.10.1 All Projections

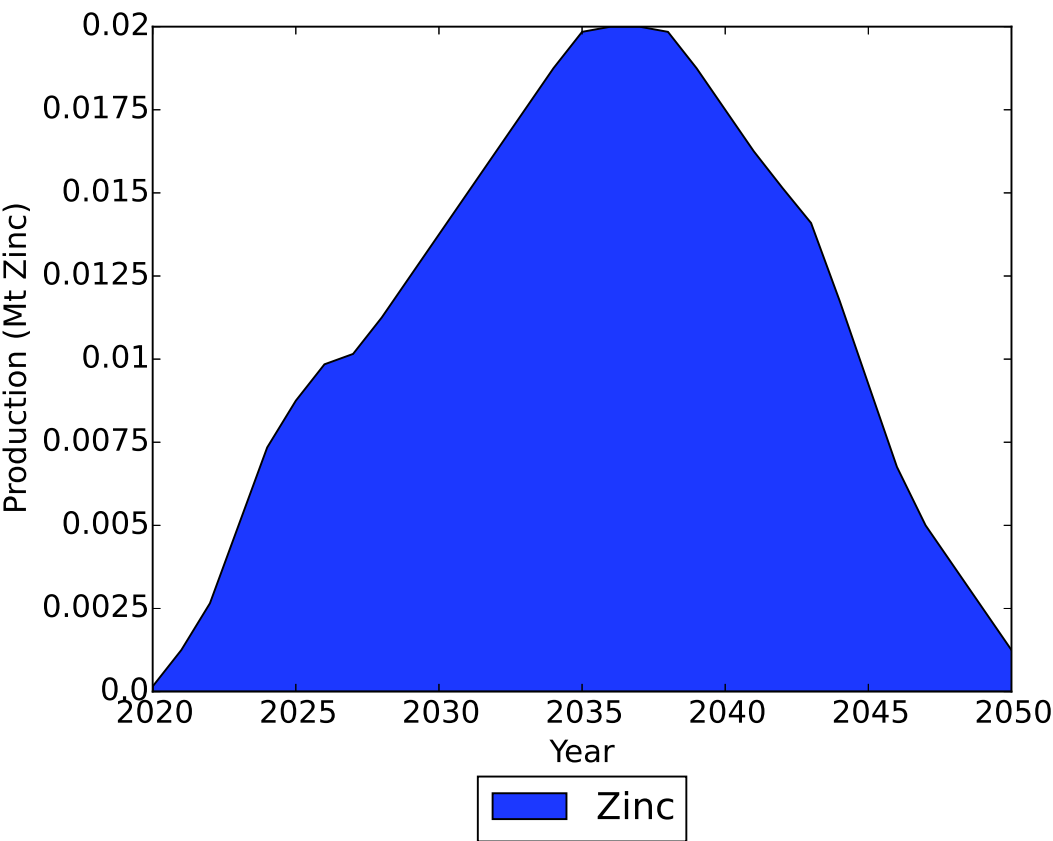

Figure 2.19: Nepal projections capped at 16

| Table 2.19: Peak years - All |      |           |           |
|------------------------------|------|-----------|-----------|
| Name                         | URR  | Peak Year | Peak Rate |
| Zinc                         | 0.35 | 2036      | 0.02      |
| Total                        | 0.35 | 2036      | 0.02      |

2.10.2 By Mineral

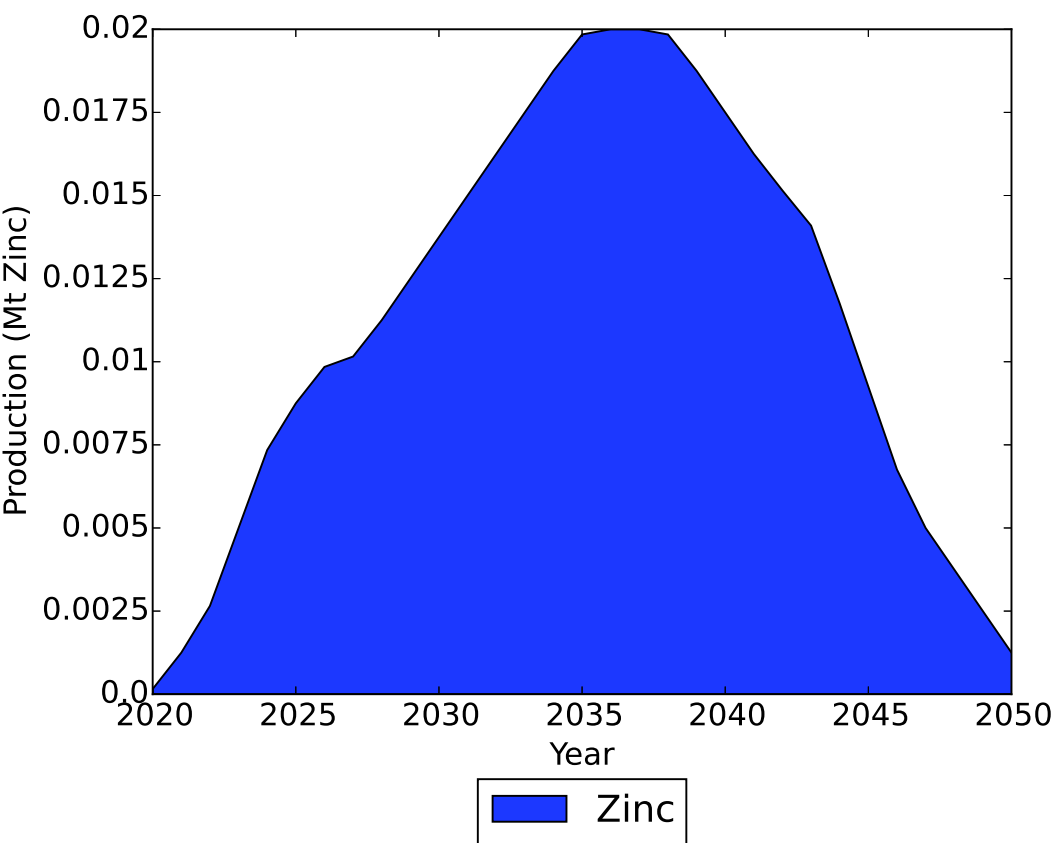

Figure 2.20: Nepal projection by mineral type

Table 2.20: Peak years - Minerals

| Name  | URR  | Peak Year | Peak Rate |
|-------|------|-----------|-----------|
| Zinc  | 0.35 | 2036      | 0.02      |
| Total | 0.35 | 2036      | 0.02      |

2.11 New Caledonia

2.11.1 All Projections

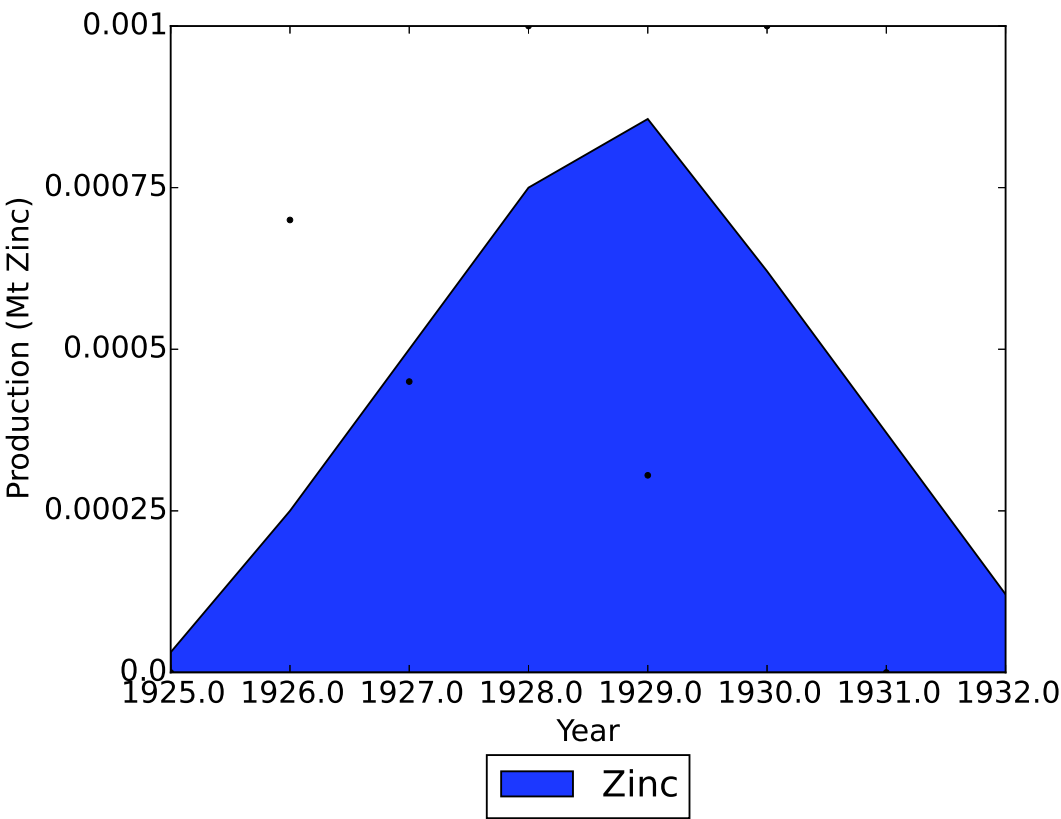

Figure 2.21: New Caledonia projections capped at 16

Table 2.21: Peak years - All

| Name  | URR | Peak Year | Peak Rate |
|-------|-----|-----------|-----------|
| Zinc  | –   | 1929      | –         |
| Total | –   | 1929      | –         |



2.11.2 By Mineral

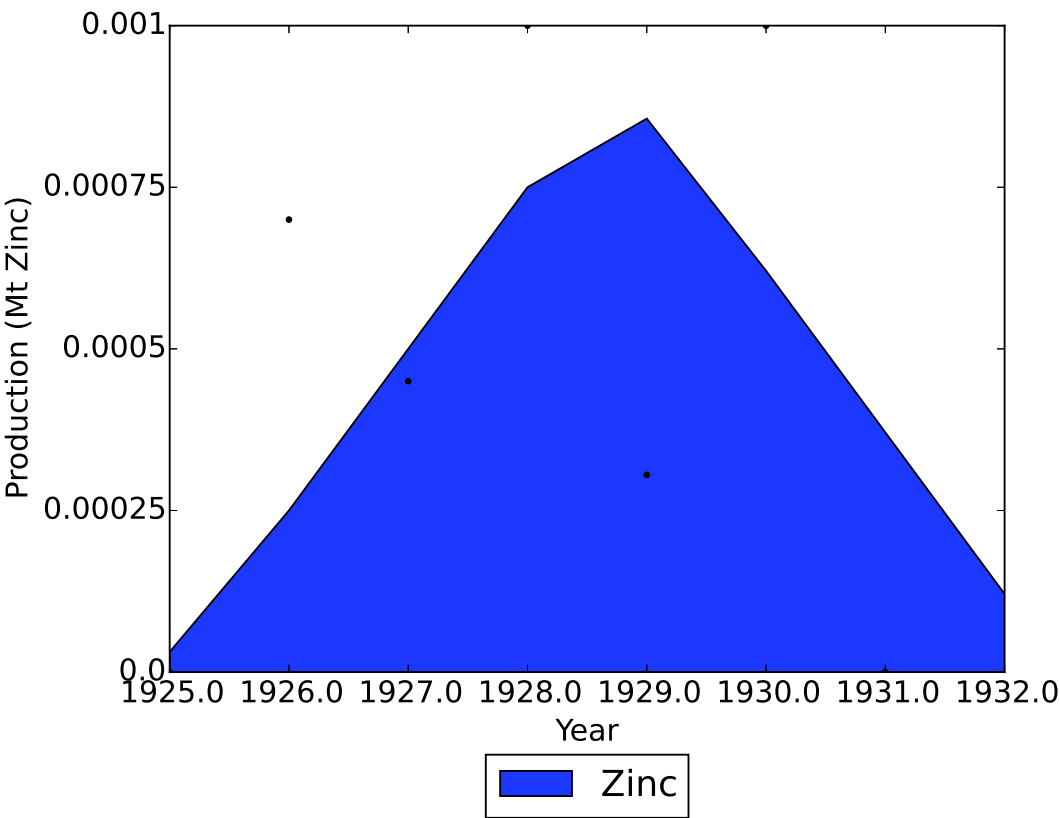

Figure 2.22: New Caledonia projection by mineral type

Table 2.22: Peak years - Minerals

| Name  | URR | Peak Year | Peak Rate |
|-------|-----|-----------|-----------|
| Zinc  | –   | 1929      | –         |
| Total | –   | 1929      | –         |

2.12 North Korea

2.12.1 All Projections

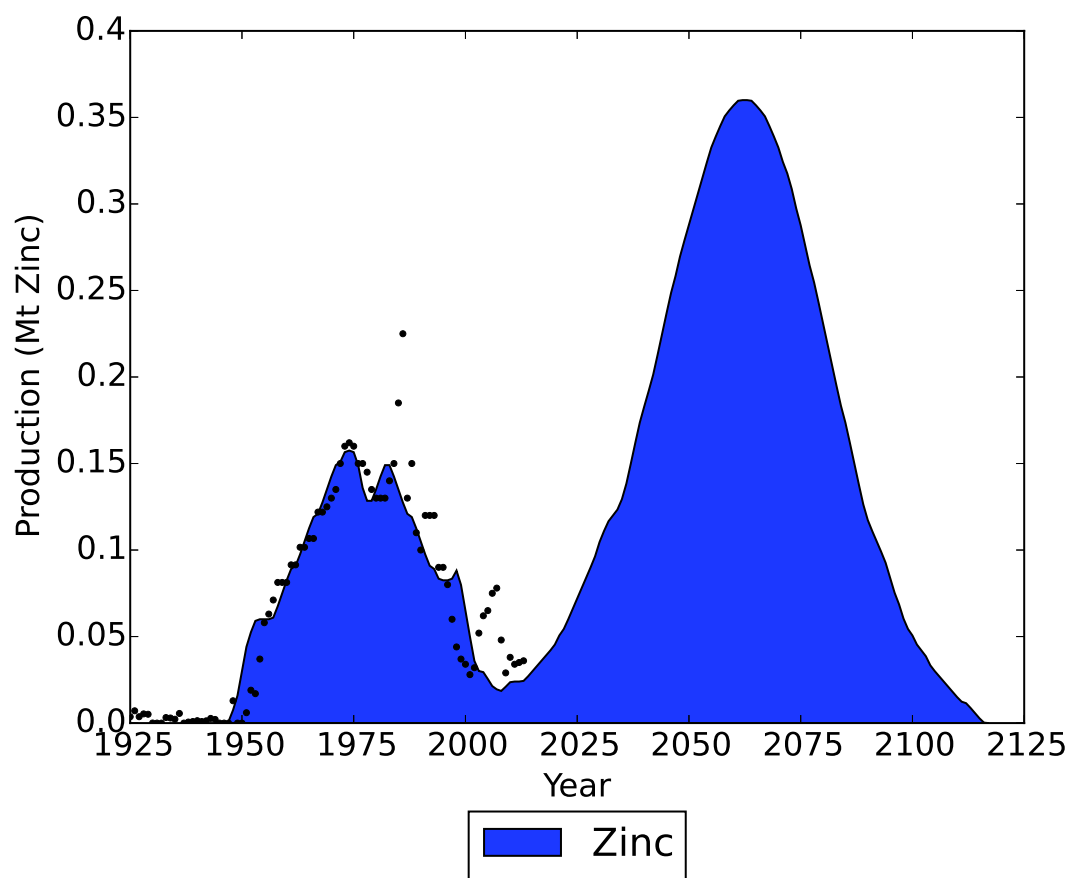

Figure 2.23: North Korea projections capped at 16

| Table 2.23: Peak years - All |       |           |           |
|------------------------------|-------|-----------|-----------|
| Name                         | URR   | Peak Year | Peak Rate |
| Zinc                         | 23.03 | 2062      | 0.36      |
| Total                        | 23.03 | 2062      | 0.36      |

2.12.2 By Mineral

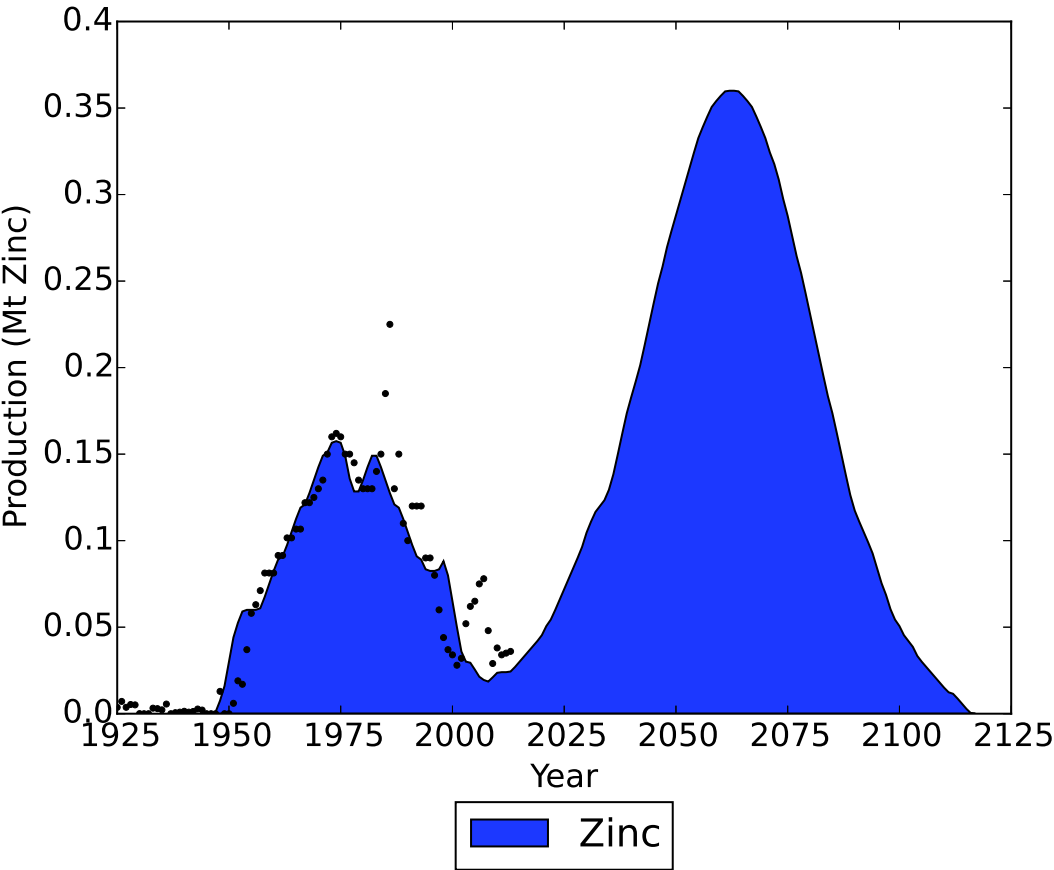

Figure 2.24: North Korea projection by mineral type

| Table 2.24: Peak years - Minerals |       |           |           |
|-----------------------------------|-------|-----------|-----------|
| Name                              | URR   | Peak Year | Peak Rate |
| Zinc                              | 23.03 | 2062      | 0.36      |
| Total                             | 23.03 | 2062      | 0.36      |

2.13 PNG

2.13.1 All Projections

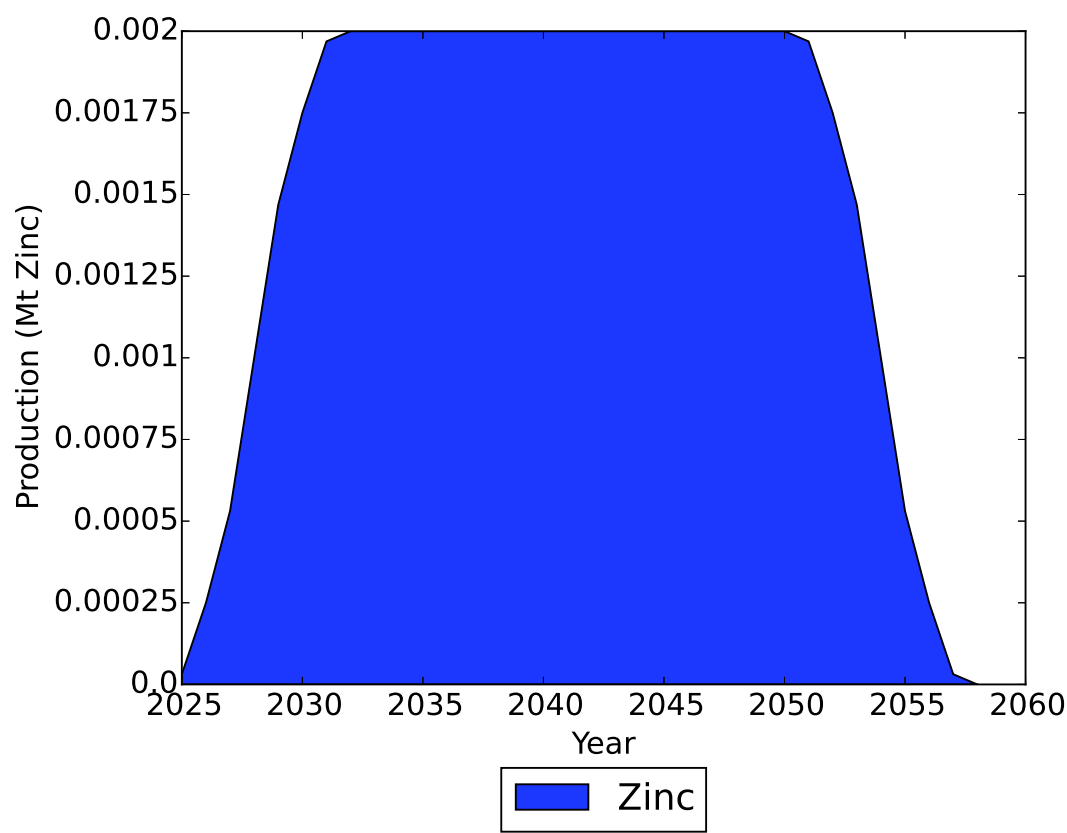

Figure 2.25: PNG projections capped at 16

| Table 2.25: Peak years - All |      |           |           |
|------------------------------|------|-----------|-----------|
| Name                         | URR  | Peak Year | Peak Rate |
| Zinc                         | 0.05 | 2032      | —         |
| Total                        | 0.05 | 2048      | —         |

2.13.2 By Mineral

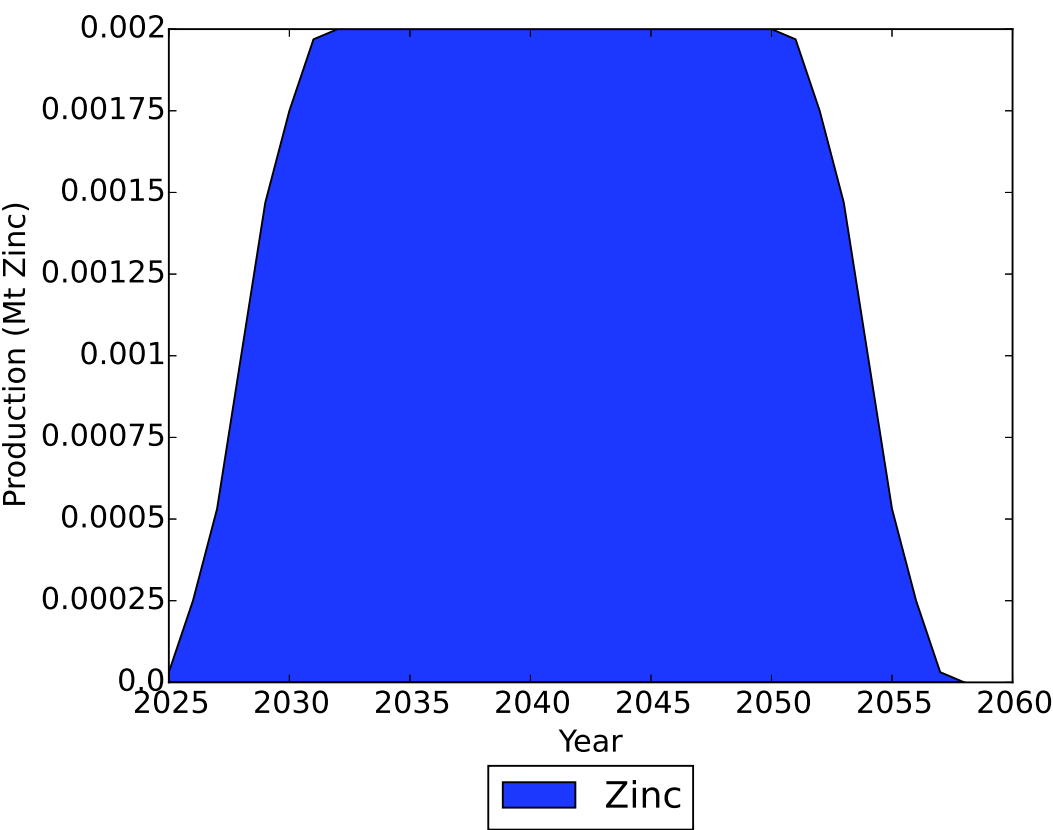

Figure 2.26: PNG projection by mineral type

| Table 2.26: Peak years - Minerals |      |           |           |
|-----------------------------------|------|-----------|-----------|
| Name                              | URR  | Peak Year | Peak Rate |
| Zinc                              | 0.05 | 2032      | —         |
| Total                             | 0.05 | 2048      | —         |

2.14 Pakistan

2.14.1 All Projections

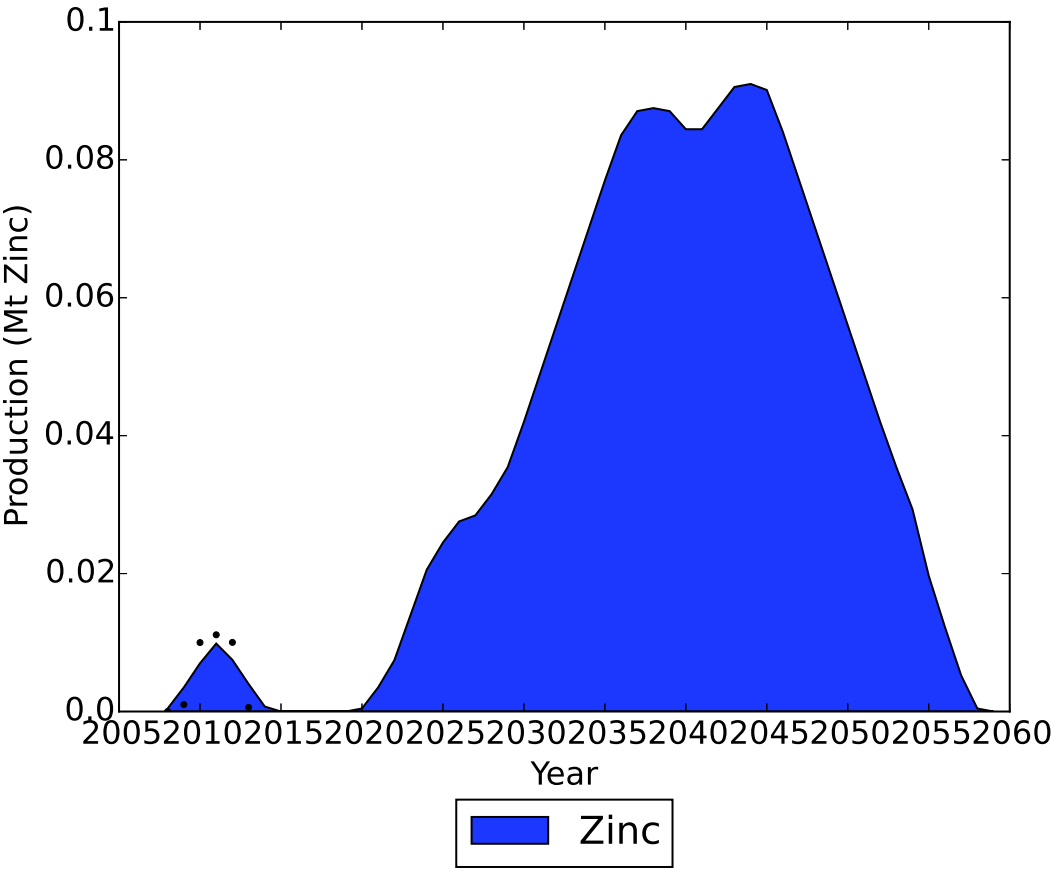

Figure 2.27: Pakistan projections capped at 16

| Table 2.27: Peak years - All |     |           |           |
|------------------------------|-----|-----------|-----------|
| Name                         | URR | Peak Year | Peak Rate |
| Zinc                         | 2.0 | 2044      | 0.09      |
| Total                        | 2.0 | 2044      | 0.09      |

2.14.2 By Mineral

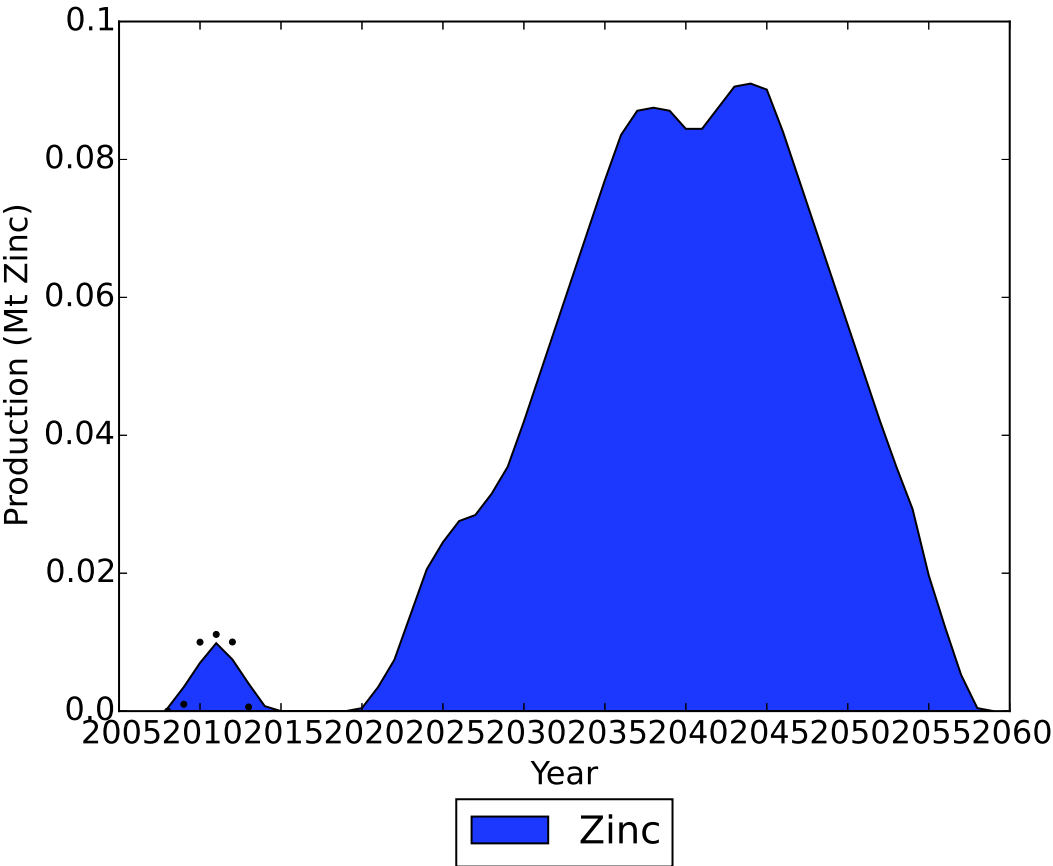

Figure 2.28: Pakistan projection by mineral type

Table 2.28: Peak years - Minerals

| Name  | URR | Peak Year | Peak Rate |
|-------|-----|-----------|-----------|
| Zinc  | 2.0 | 2044      | 0.09      |
| Total | 2.0 | 2044      | 0.09      |

2.15 Philippines

2.15.1 All Projections

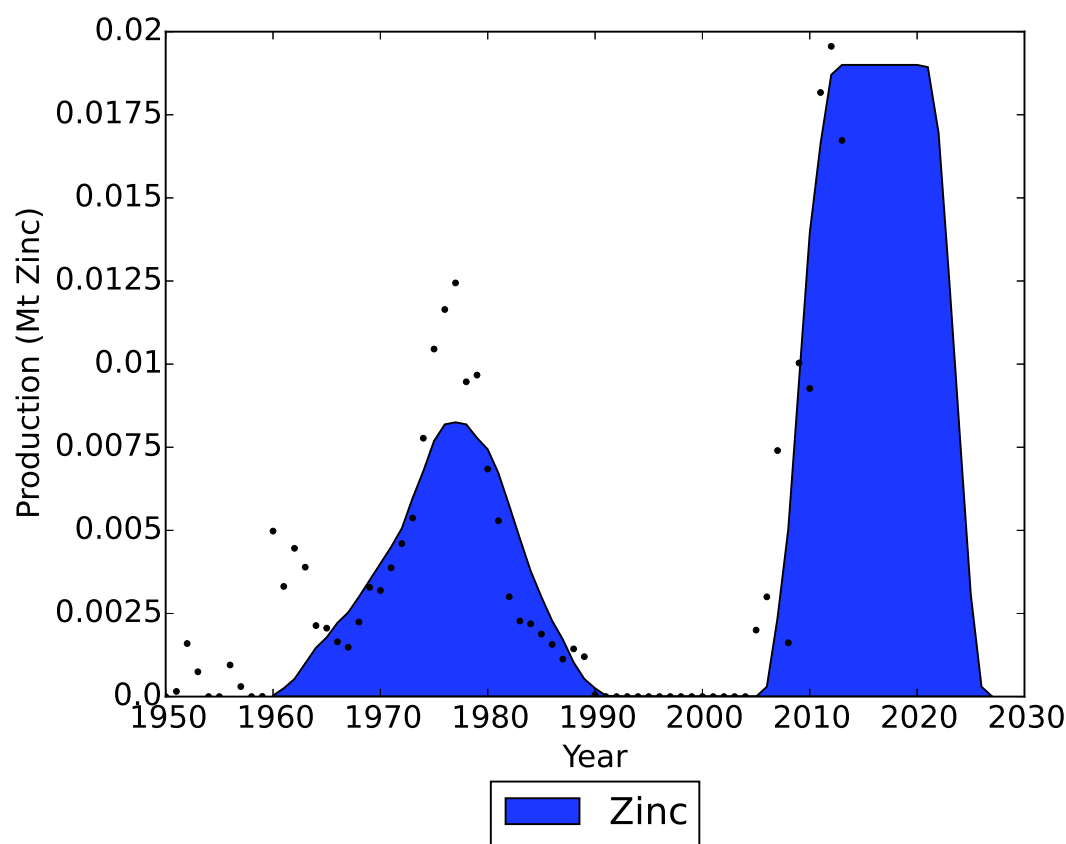

Figure 2.29: Philippines projections capped at 16

| Table 2.29: Peak years - All |     |           |           |
|------------------------------|-----|-----------|-----------|
| Name                         | URR | Peak Year | Peak Rate |
| Zinc                         | 0.4 | 2013      | 0.02      |
| Total                        | 0.4 | 2013      | 0.02      |



2.15.2 By Mineral

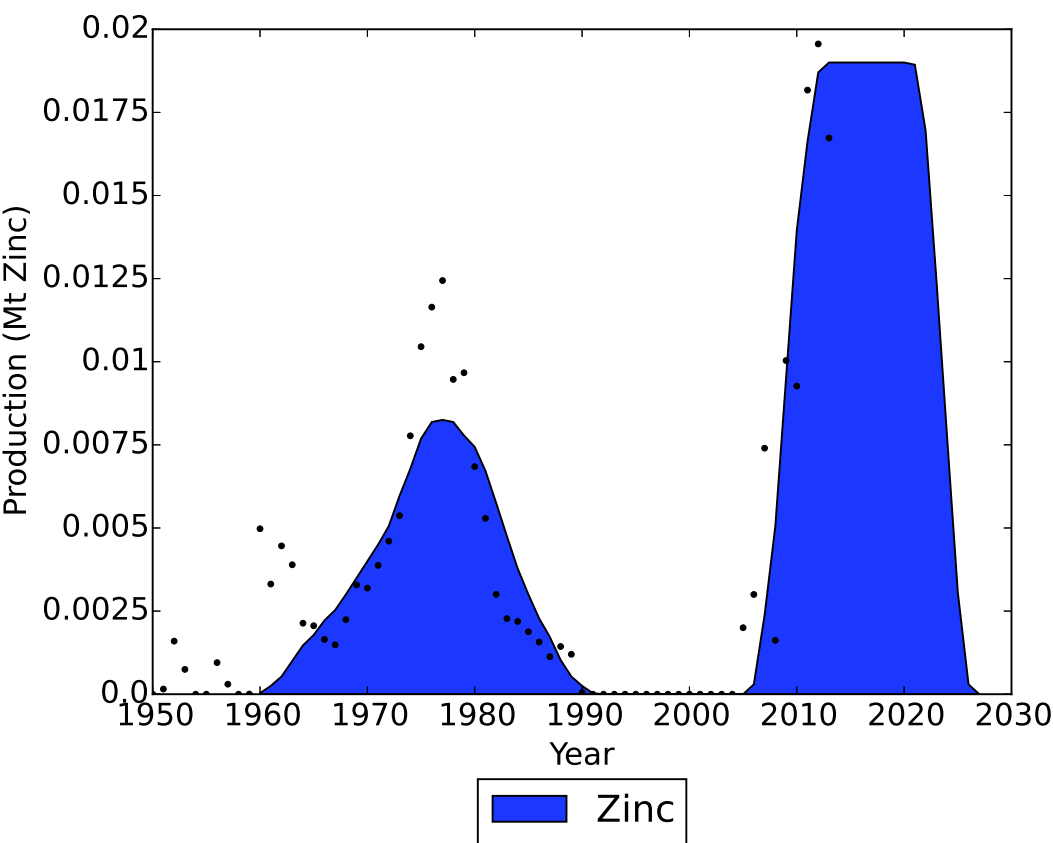

Figure 2.30: Philippines projection by mineral type

| Table 2.30: Peak years - Minerals |     |           |           |
|-----------------------------------|-----|-----------|-----------|
| Name                              | URR | Peak Year | Peak Rate |
| Zinc                              | 0.4 | 2013      | 0.02      |
| Total                             | 0.4 | 2013      | 0.02      |

2.16 Saudi Arabia

2.16.1 All Projections

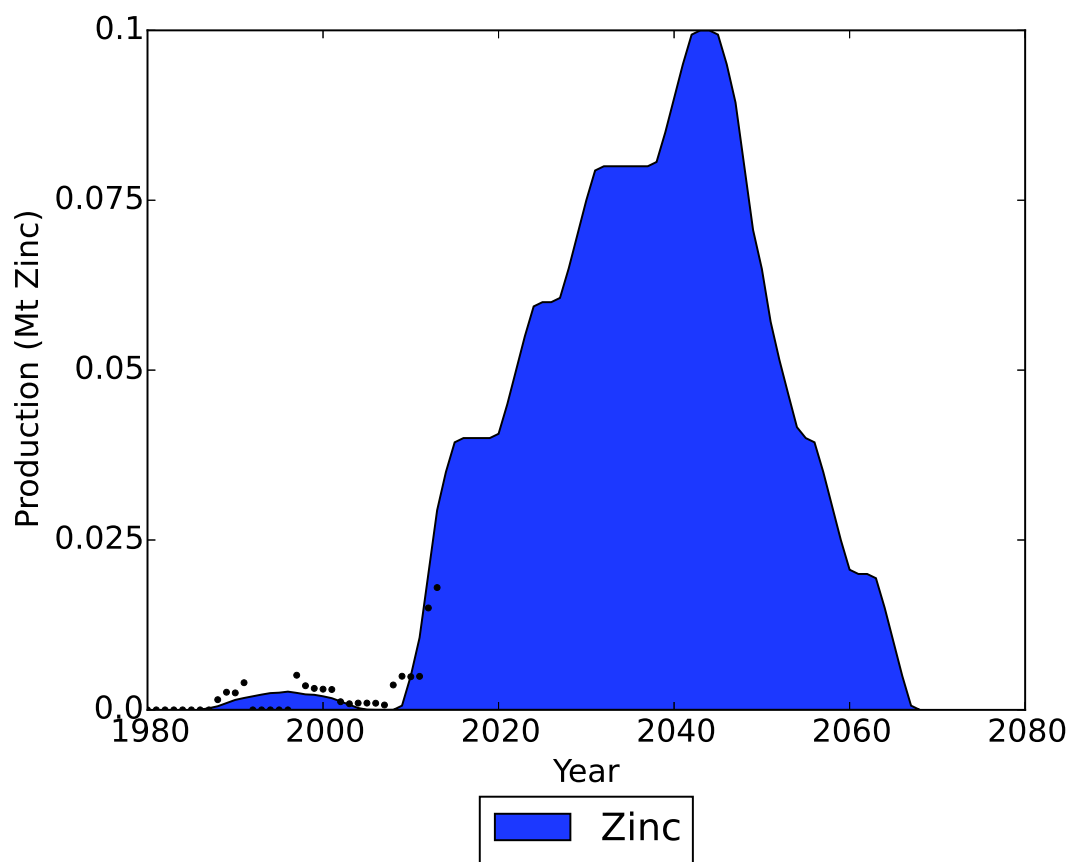

Figure 2.31: Saudi Arabia projections capped at 16

| Table 2.31: Peak years - All |      |           |           |
|------------------------------|------|-----------|-----------|
| Name                         | URR  | Peak Year | Peak Rate |
| Zinc                         | 3.16 | 2043      | 0.1       |
| Total                        | 3.16 | 2043      | 0.1       |

2.16.2 By Mineral

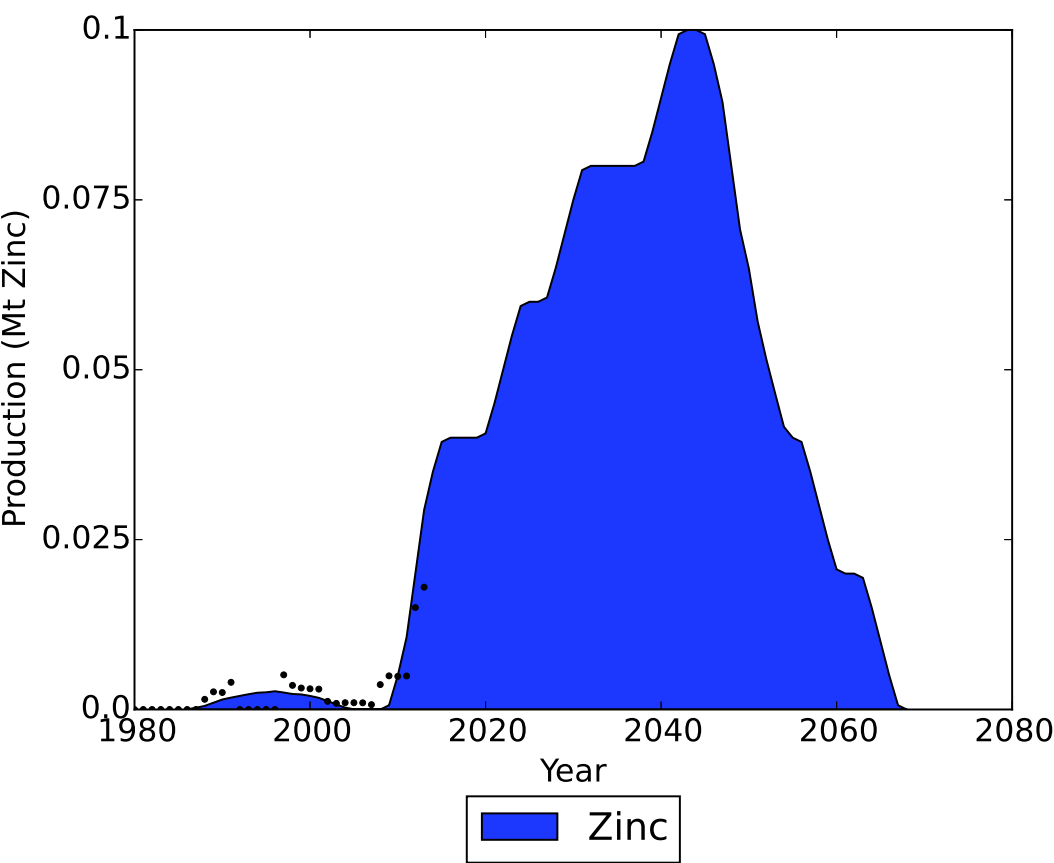

Figure 2.32: Saudi Arabia projection by mineral type

| Table 2.32: Peak years - Minerals |             |             |            |
|-----------------------------------|-------------|-------------|------------|
| Name                              | URR         | Peak Year   | Peak Rate  |
| Zinc                              | 3.16        | 2043        | 0.1        |
| <b>Total</b>                      | <b>3.16</b> | <b>2043</b> | <b>0.1</b> |

2.17 South Korea

2.17.1 All Projections

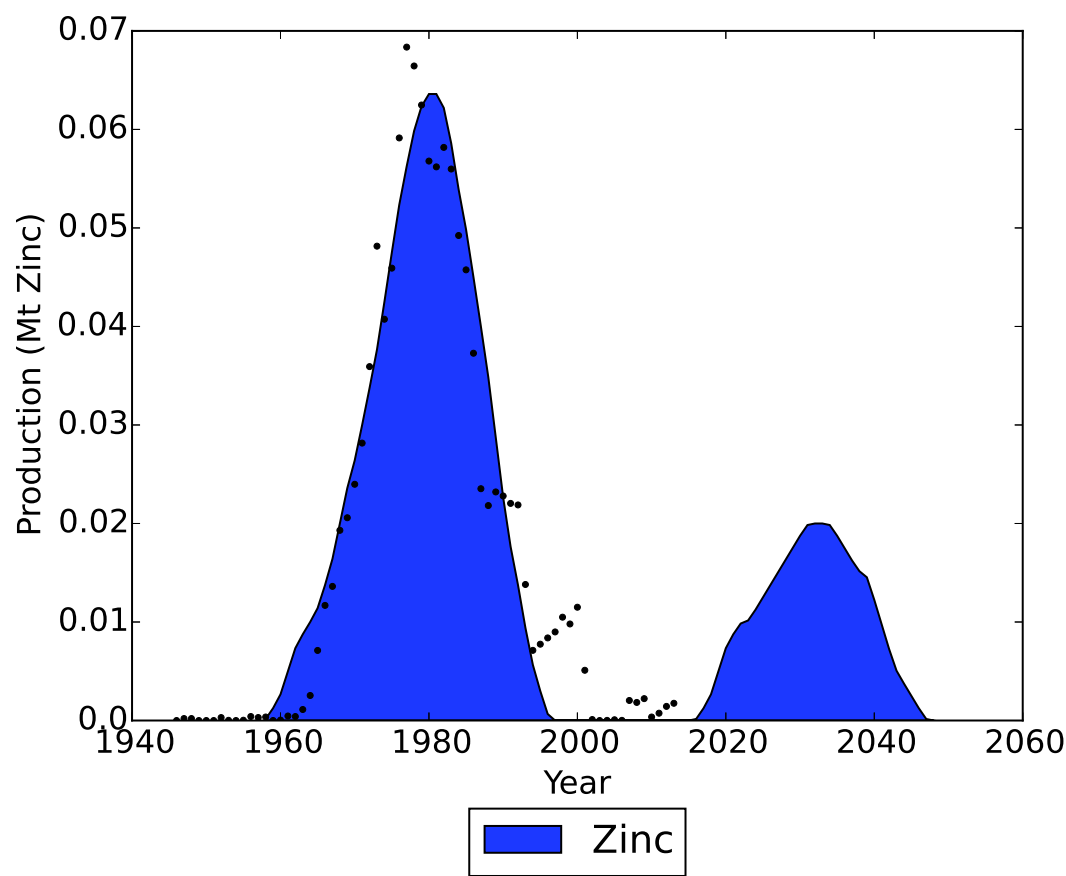

Figure 2.33: South Korea projections capped at 16

| Table 2.33: Peak years - All |     |           |           |
|------------------------------|-----|-----------|-----------|
| Name                         | URR | Peak Year | Peak Rate |
| Zinc                         | 1.5 | 1980      | 0.06      |
| Total                        | 1.5 | 1980      | 0.06      |

2.17.2 By Mineral

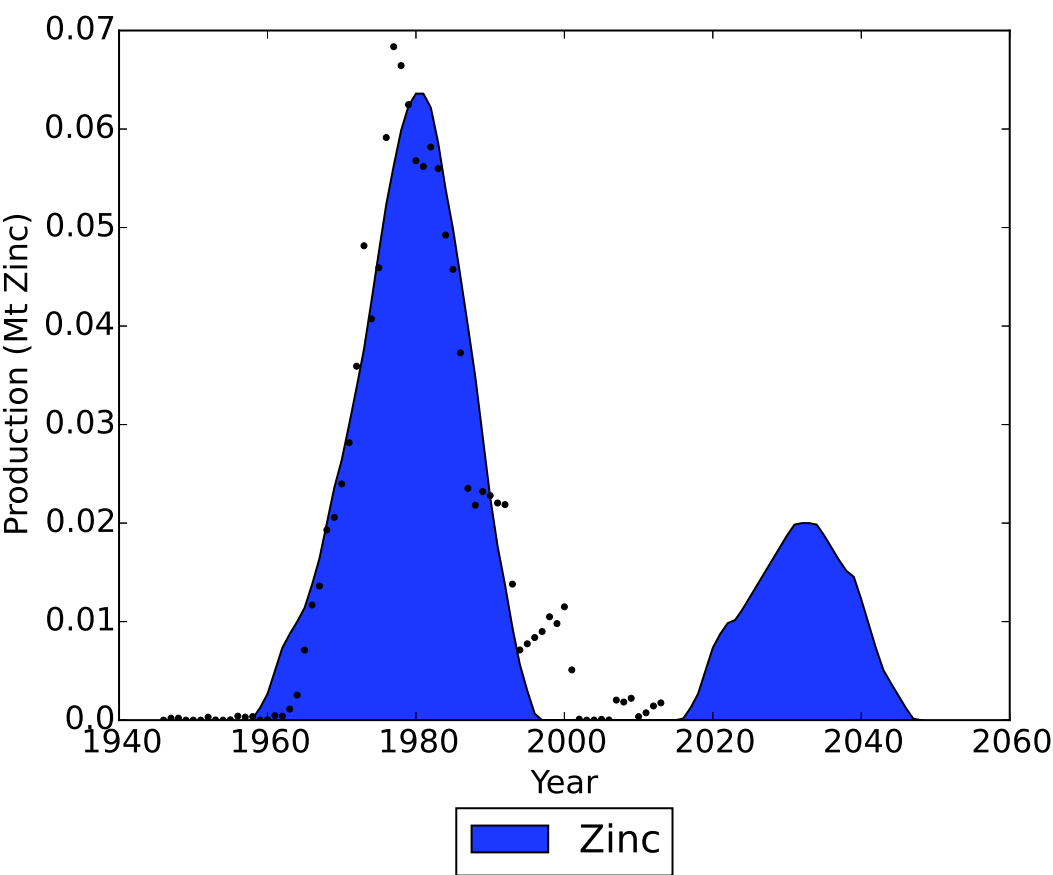

Figure 2.34: South Korea projection by mineral type

| Table 2.34: Peak years - Minerals |     |           |           |
|-----------------------------------|-----|-----------|-----------|
| Name                              | URR | Peak Year | Peak Rate |
| Zinc                              | 1.5 | 1980      | 0.06      |
| Total                             | 1.5 | 1980      | 0.06      |

2.18 Thailand

2.18.1 All Projections

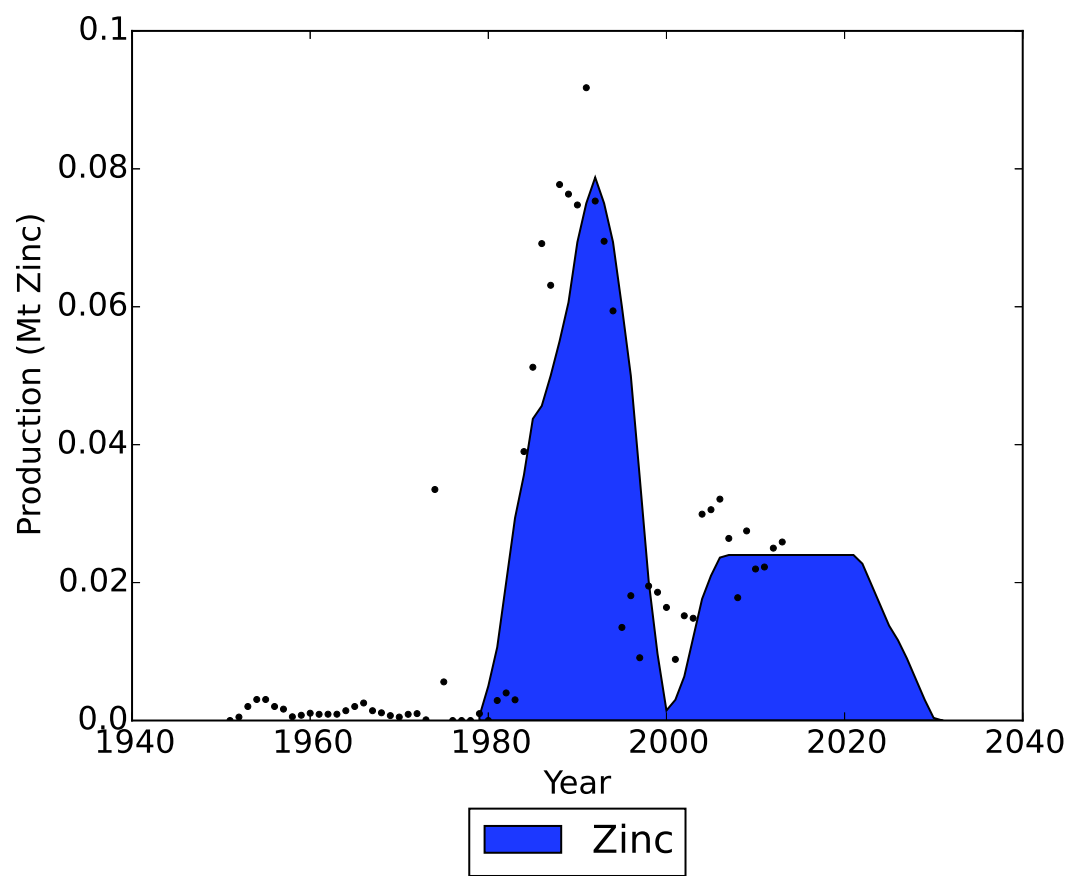

Figure 2.35: Thailand projections capped at 16

| Table 2.35: Peak years - All |      |           |           |
|------------------------------|------|-----------|-----------|
| Name                         | URR  | Peak Year | Peak Rate |
| Zinc                         | 1.45 | 1992      | 0.08      |
| Total                        | 1.45 | 1992      | 0.08      |

2.18.2 By Mineral

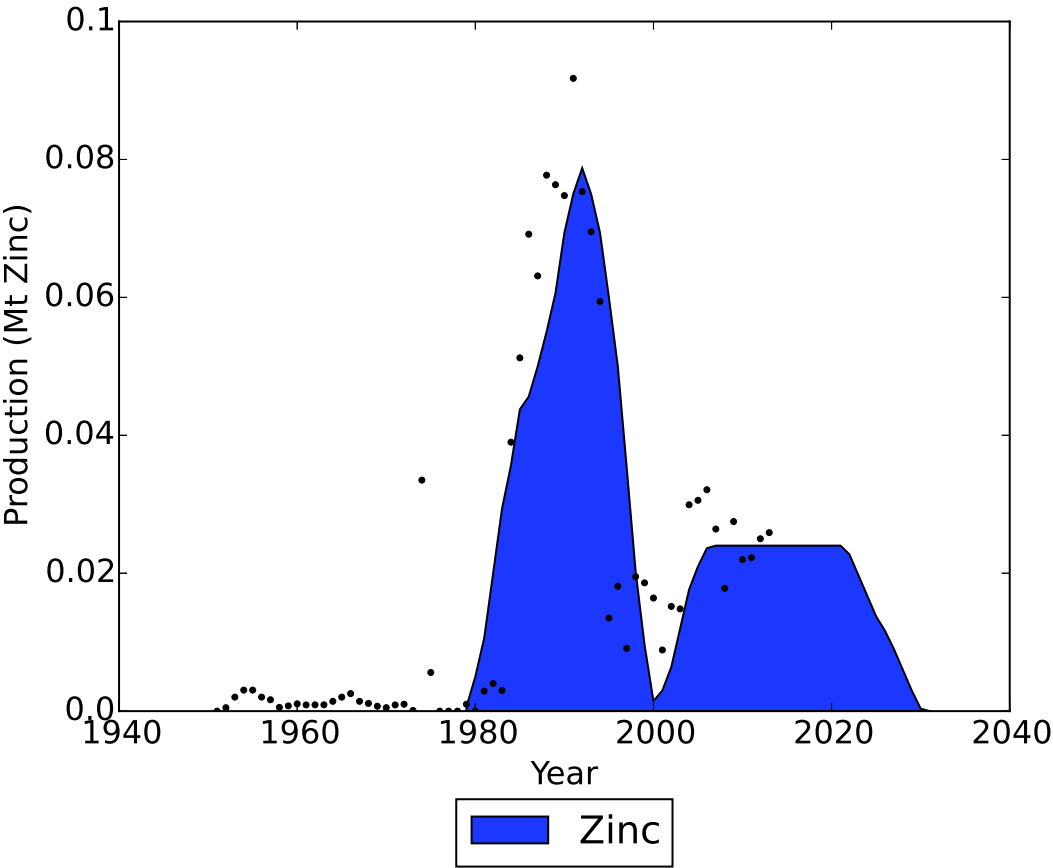

Figure 2.36: Thailand projection by mineral type

| Table 2.36: Peak years - Minerals |      |           |           |  |
|-----------------------------------|------|-----------|-----------|--|
| Name                              | URR  | Peak Year | Peak Rate |  |
| Zinc                              | 1.45 | 1992      | 0.08      |  |
| Total                             | 1.45 | 1992      | 0.08      |  |

2.19 Vietnam

2.19.1 All Projections

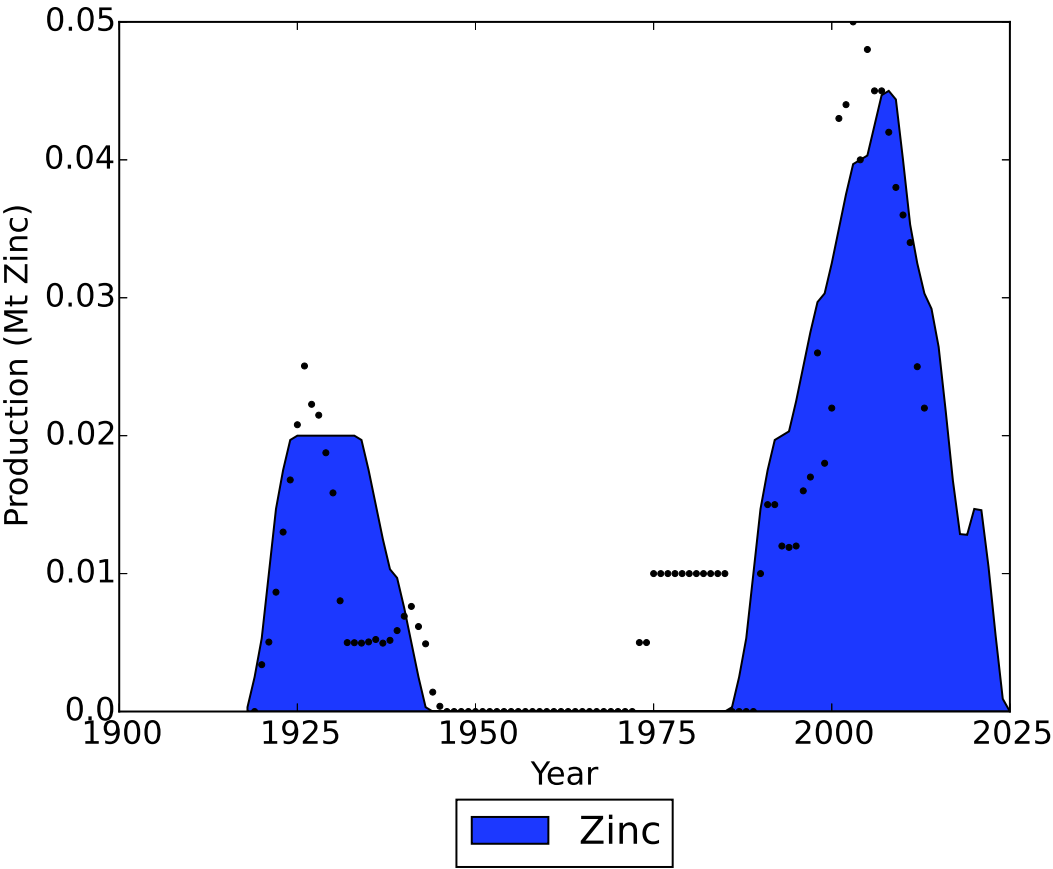

Figure 2.37: Vietnam projections capped at 16

| Table 2.37: Peak years - All |     |           |           |
|------------------------------|-----|-----------|-----------|
| Name                         | URR | Peak Year | Peak Rate |
| Zinc                         | 1.3 | 2008      | 0.05      |
| Total                        | 1.3 | 2008      | 0.05      |



2.19.2 By Mineral

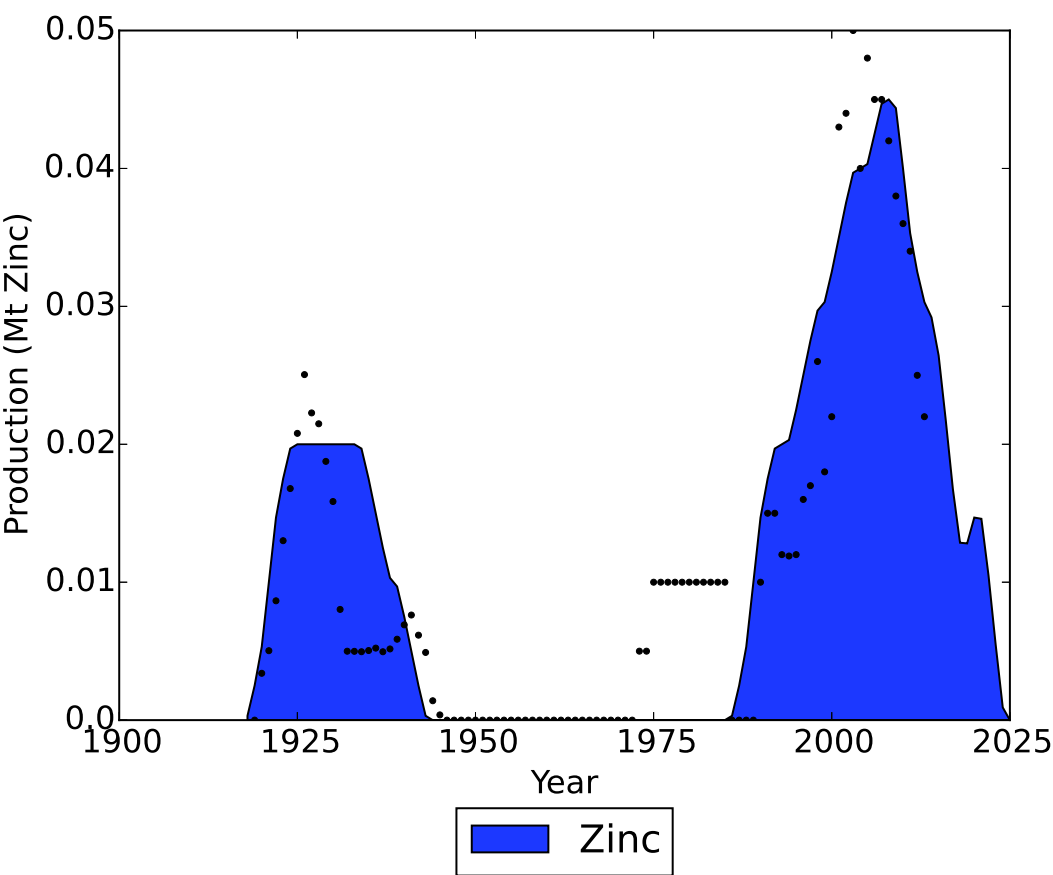

Figure 2.38: Vietnam projection by mineral type

| Table 2.38: Peak years - Minerals |     |           |           |
|-----------------------------------|-----|-----------|-----------|
| Name                              | URR | Peak Year | Peak Rate |
| Zinc                              | 1.3 | 2008      | 0.05      |
| Total                             | 1.3 | 2008      | 0.05      |

2.20 Yemen

2.20.1 All Projections

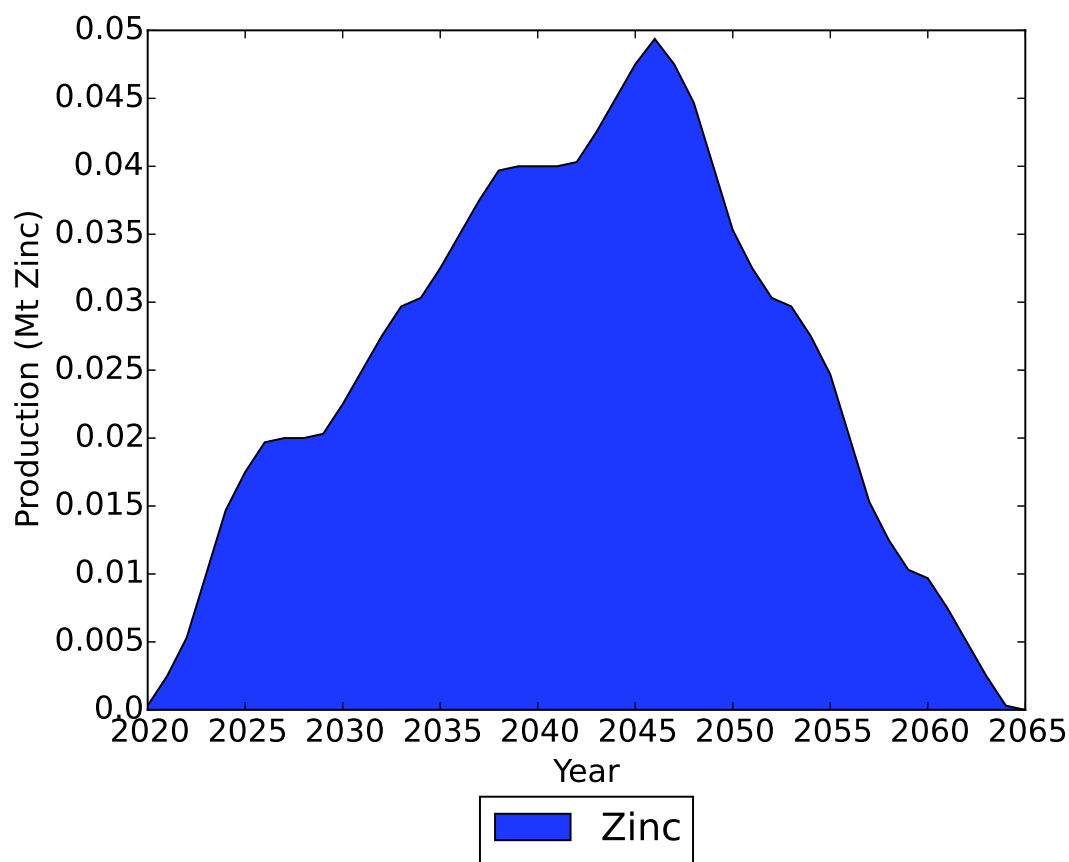

Figure 2.39: Yemen projections capped at 16

| Table 2.39: Peak years - All |      |           |           |
|------------------------------|------|-----------|-----------|
| Name                         | URR  | Peak Year | Peak Rate |
| Zinc                         | 1.15 | 2046      | 0.05      |
| Total                        | 1.15 | 2046      | 0.05      |

2.20.2 By Mineral

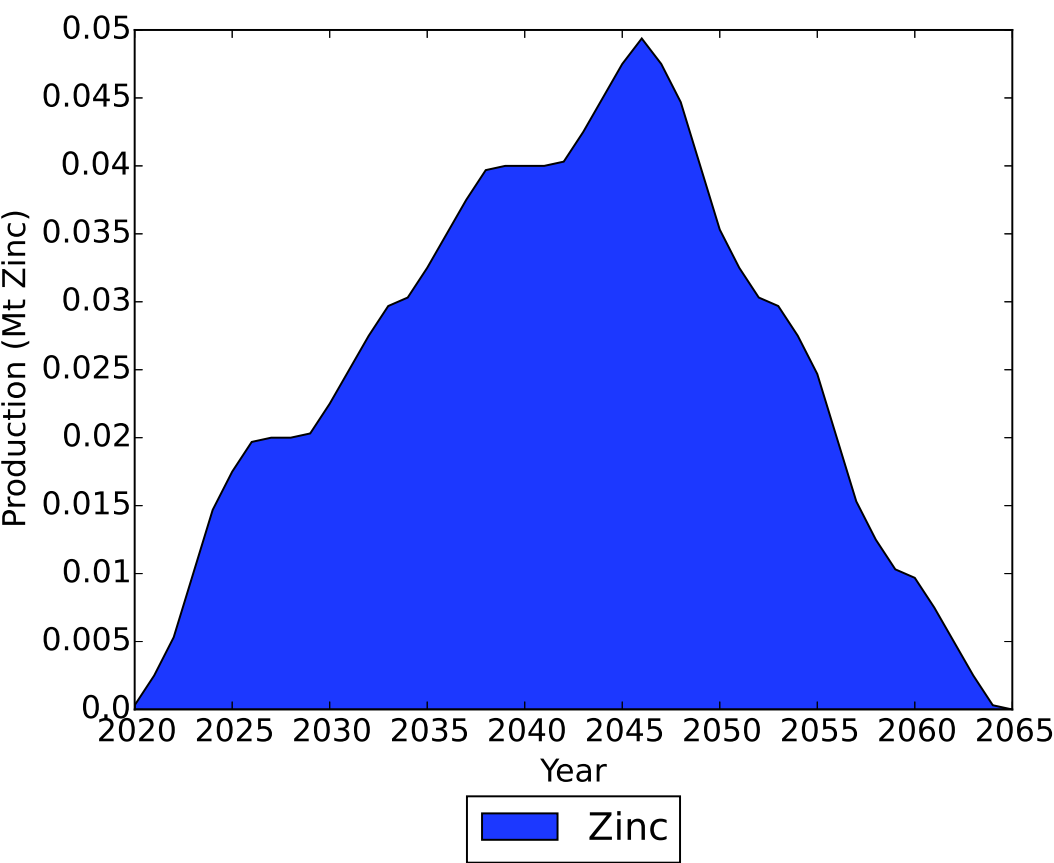

Figure 2.40: Yemen projection by mineral type

| Table 2.40: Peak years - Minerals |      |           |           |
|-----------------------------------|------|-----------|-----------|
| Name                              | URR  | Peak Year | Peak Rate |
| Zinc                              | 1.15 | 2046      | 0.05      |
| Total                             | 1.15 | 2046      | 0.05      |

2.21 Total

2.21.1 By country

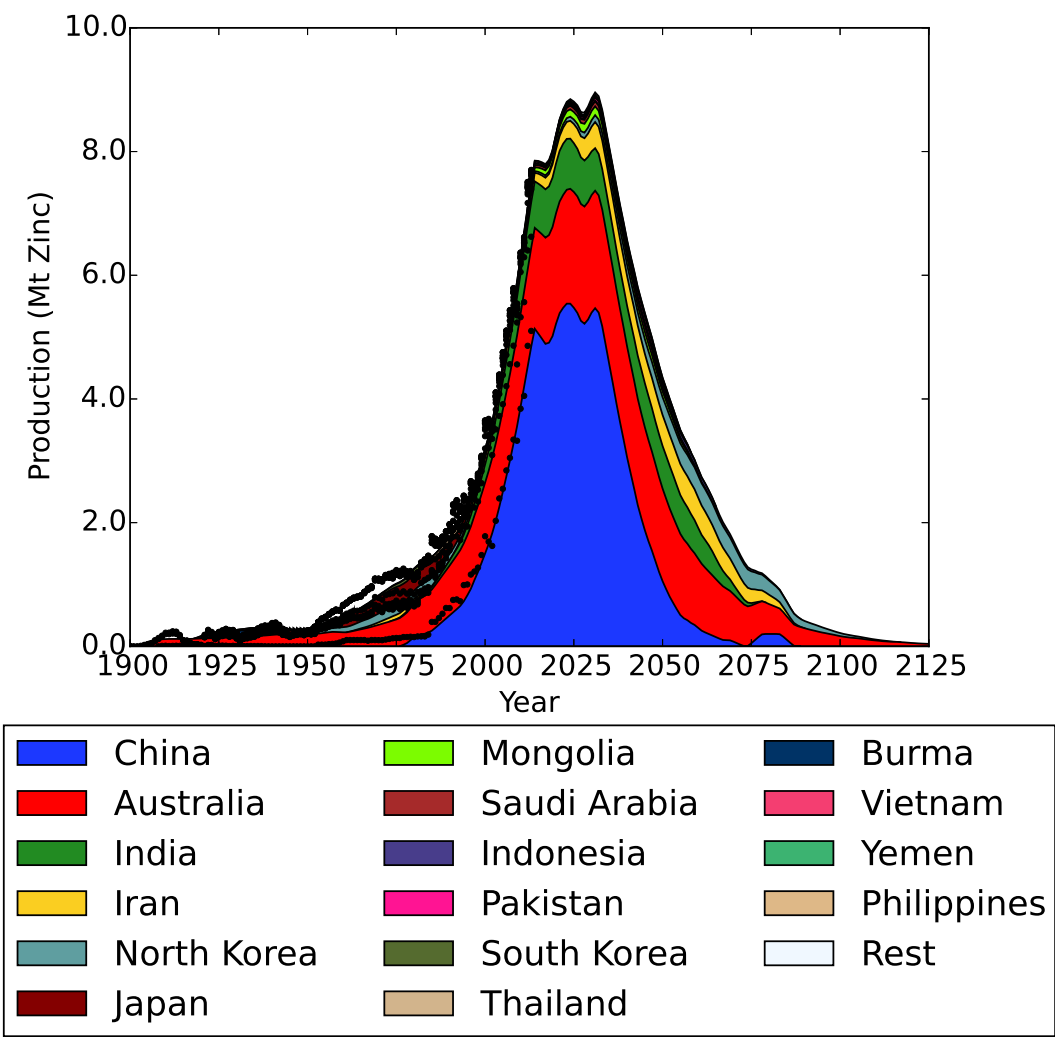

Figure 2.41: Asia projections by country

2.21.2 By mineral

Table 2.41: Peak years - All

| <b>Name</b>   | <b>URR</b>    | <b>Peak Year</b> | <b>Peak Rate</b> |
|---------------|---------------|------------------|------------------|
| China         | 213.22        | 2023             | 5.54             |
| Australia     | 153.66        | 2030             | 1.9              |
| India         | 45.88         | 2022             | 0.83             |
| Iran          | 29.06         | 2055             | 0.5              |
| North Korea   | 23.03         | 2062             | 0.36             |
| Japan         | 10.58         | 1976             | 0.29             |
| Mongolia      | 5.09          | 2029             | 0.15             |
| Saudi Arabia  | 3.16          | 2043             | 0.1              |
| Indonesia     | 2.55          | 2056             | 0.07             |
| Pakistan      | 2.0           | 2044             | 0.09             |
| South Korea   | 1.5           | 1980             | 0.06             |
| Thailand      | 1.45          | 1992             | 0.08             |
| Burma         | 1.42          | 1923             | 0.06             |
| Vietnam       | 1.3           | 2008             | 0.05             |
| Yemen         | 1.15          | 2046             | 0.05             |
| Philippines   | 0.4           | 2013             | 0.02             |
| Nepal         | 0.35          | 2036             | 0.02             |
| Laos          | 0.26          | 2025             | 0.02             |
| PNG           | 0.05          | 2032             | —                |
| New Caledonia | —             | 1929             | —                |
| <b>Total</b>  | <b>496.12</b> | <b>2031</b>      | <b>8.96</b>      |

Table 2.42: Peak years - Minerals

| <b>Name</b>  | <b>URR</b>    | <b>Peak Year</b> | <b>Peak Rate</b> |
|--------------|---------------|------------------|------------------|
| Zinc Zinc    | 496.12        | 2031             | 8.96             |
| <b>Total</b> | <b>496.12</b> | <b>2031</b>      | <b>8.96</b>      |

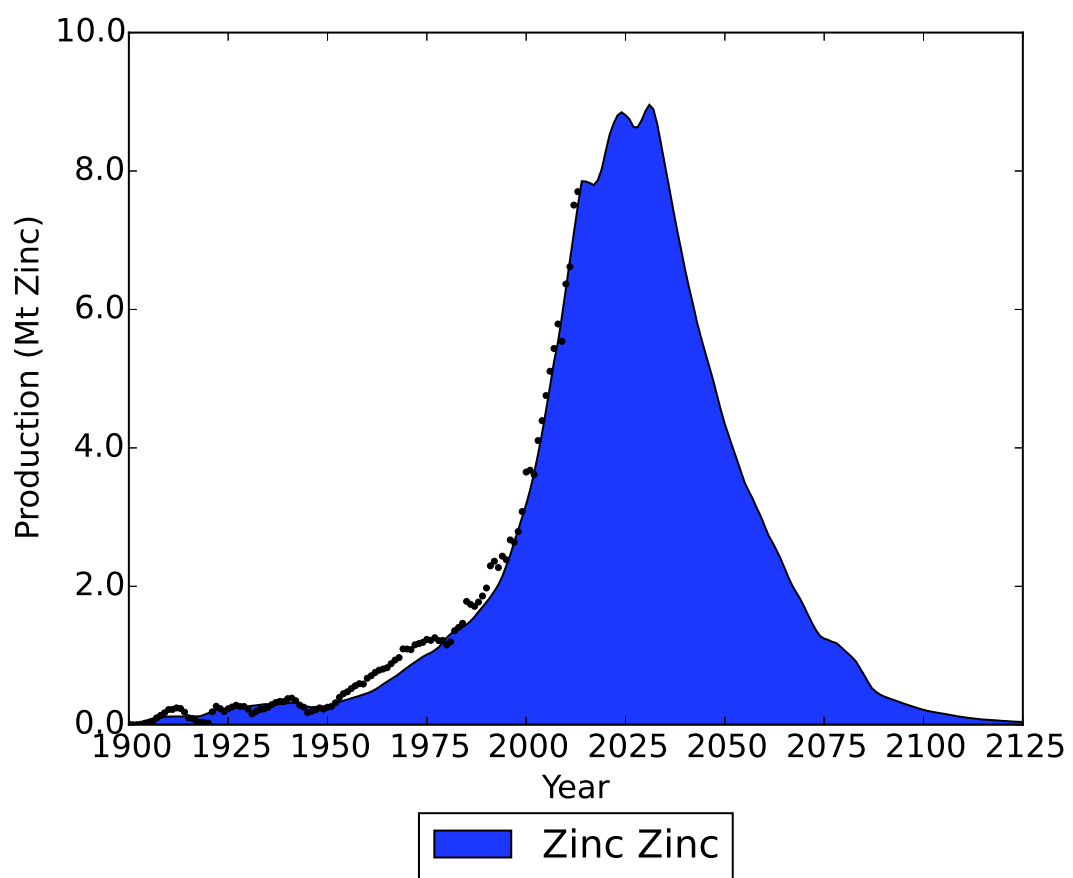

Figure 2.42: Asia projection by mineral type

# Chapter 3

## Central America

### 3.1 Cuba

#### 3.1.1 All Projections

Table 3.1: Peak years - All

| Name  | URR         | Peak Year   | Peak Rate   |
|-------|-------------|-------------|-------------|
| Zinc  | 0.37        | 2032        | 0.02        |
| Total | <b>0.37</b> | <b>2032</b> | <b>0.02</b> |

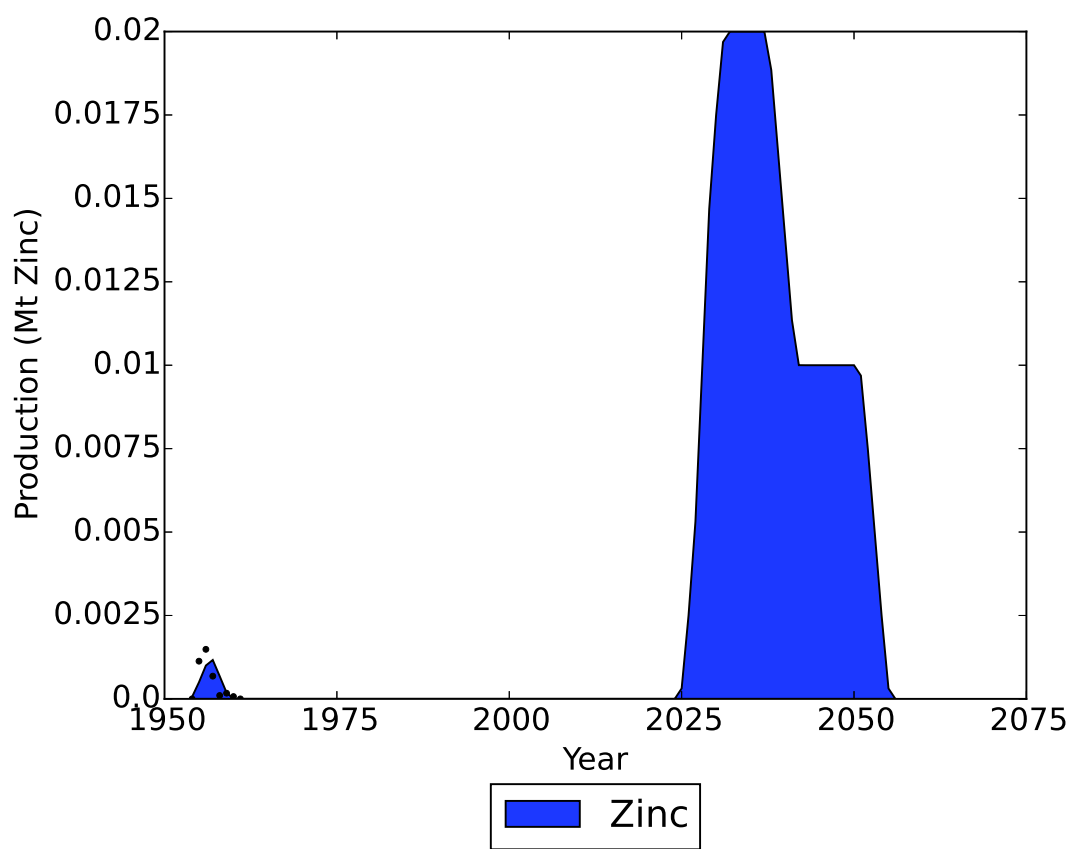

Figure 3.1: Cuba projections capped at 16



3.1.2 By Mineral

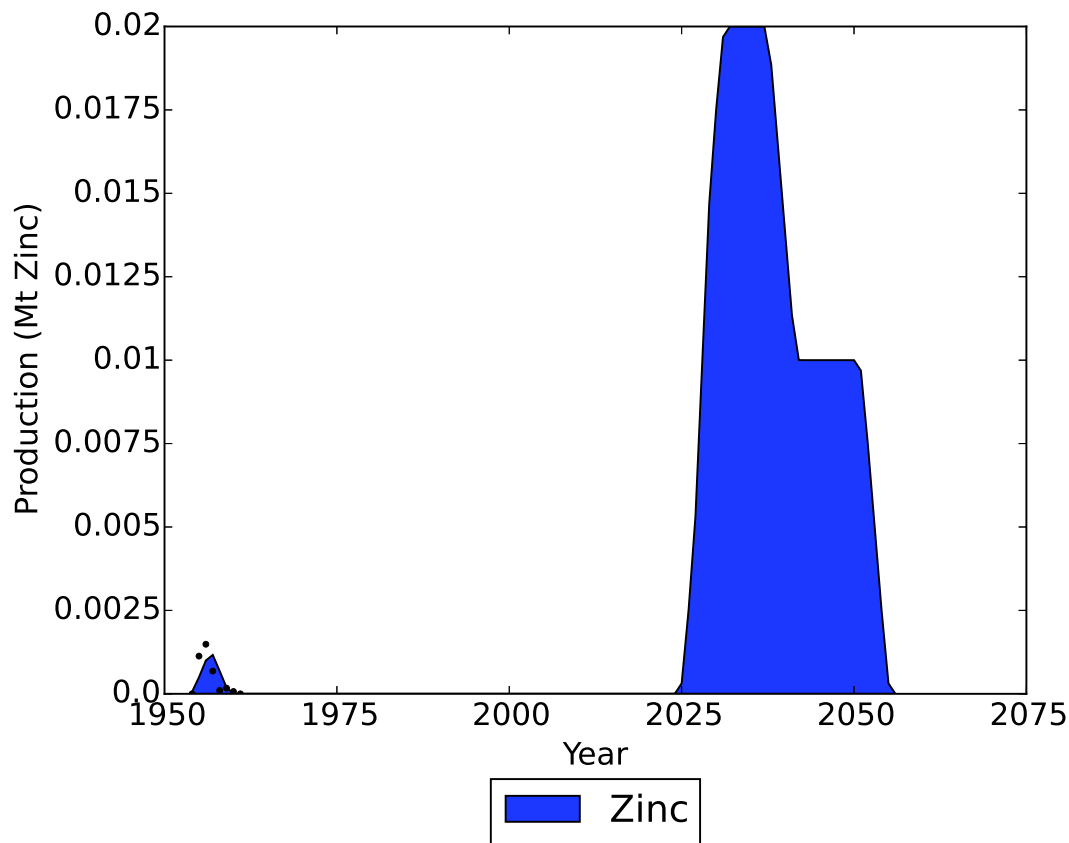

Figure 3.2: Cuba projection by mineral type

| Table 3.2: Peak years - Minerals |      |           |           |
|----------------------------------|------|-----------|-----------|
| Name                             | URR  | Peak Year | Peak Rate |
| Zinc                             | 0.37 | 2032      | 0.02      |
| Total                            | 0.37 | 2032      | 0.02      |

## 3.2 Dominican Republic

### 3.2.1 All Projections

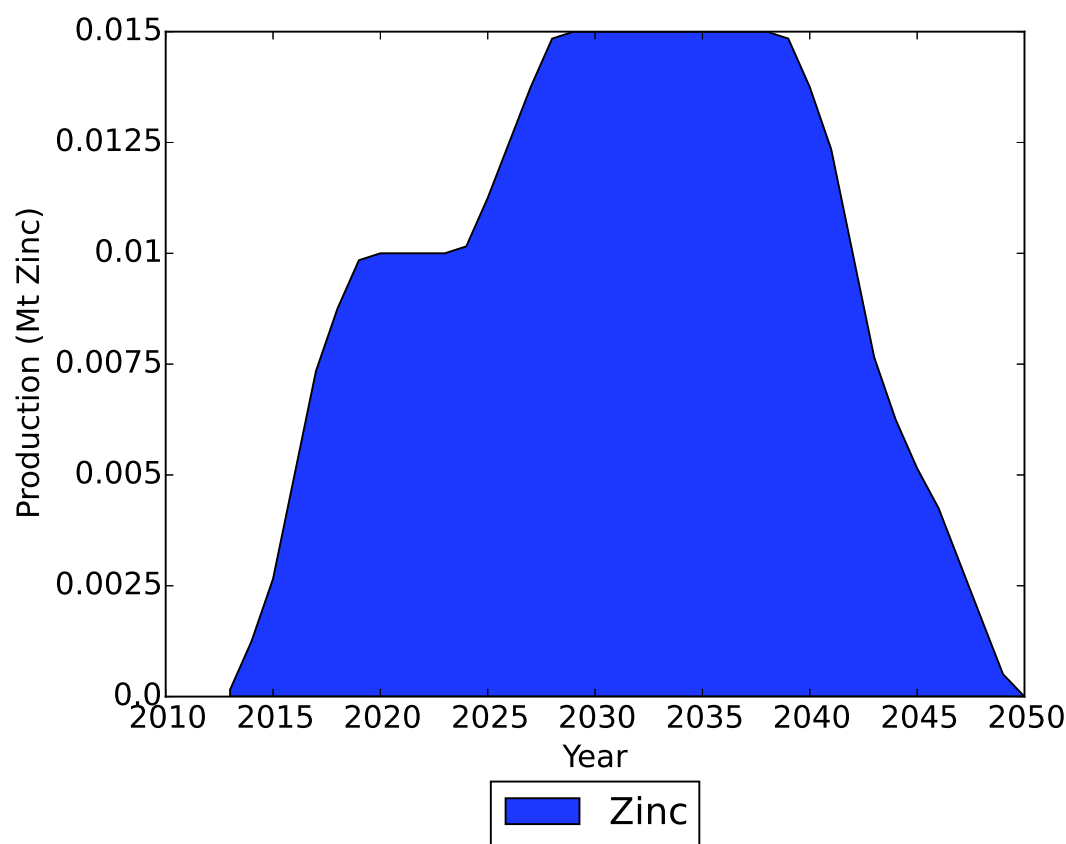

Figure 3.3: Dominican Republic projections capped at 16

Table 3.3: Peak years - All

| Name  | URR  | Peak Year | Peak Rate |
|-------|------|-----------|-----------|
| Zinc  | 0.37 | 2029      | 0.02      |
| Total | 0.37 | 2029      | 0.02      |

3.2.2 By Mineral

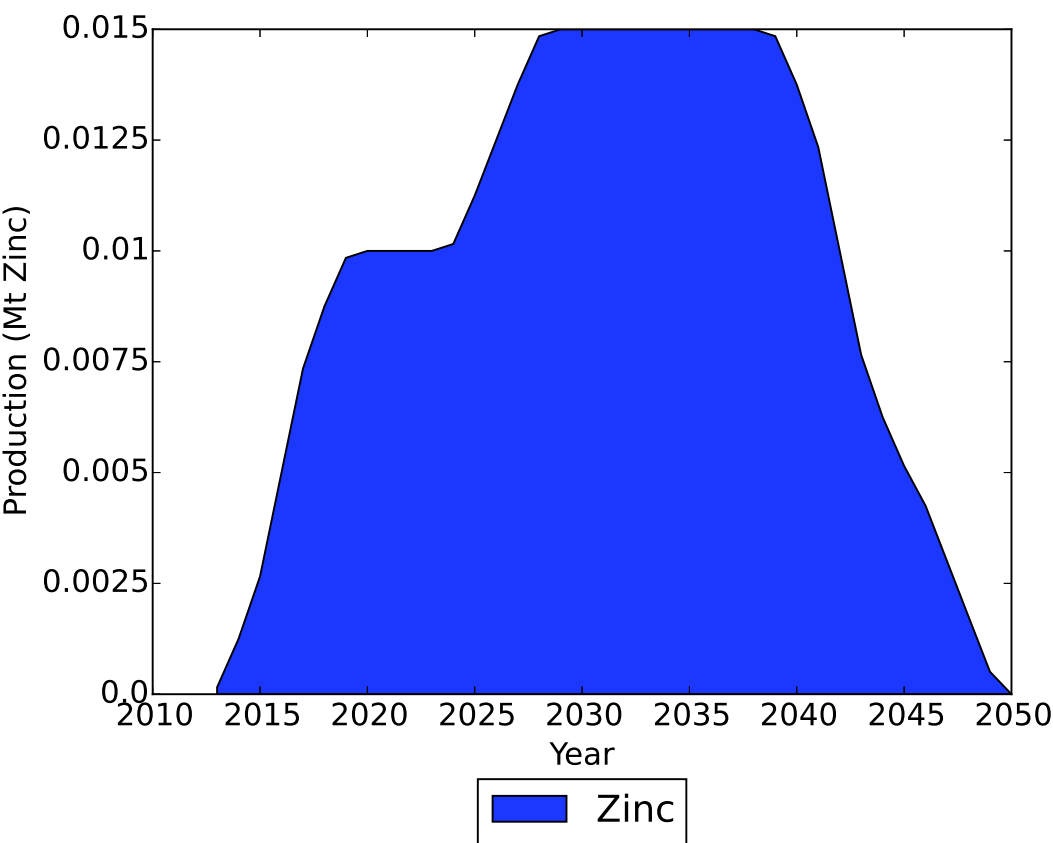

Figure 3.4: Dominican Republic projection by mineral type

| Table 3.4: Peak years - Minerals |      |           |           |
|----------------------------------|------|-----------|-----------|
| Name                             | URR  | Peak Year | Peak Rate |
| Zinc                             | 0.37 | 2029      | 0.02      |
| Total                            | 0.37 | 2029      | 0.02      |

### 3.3 El Salvador

#### 3.3.1 All Projections

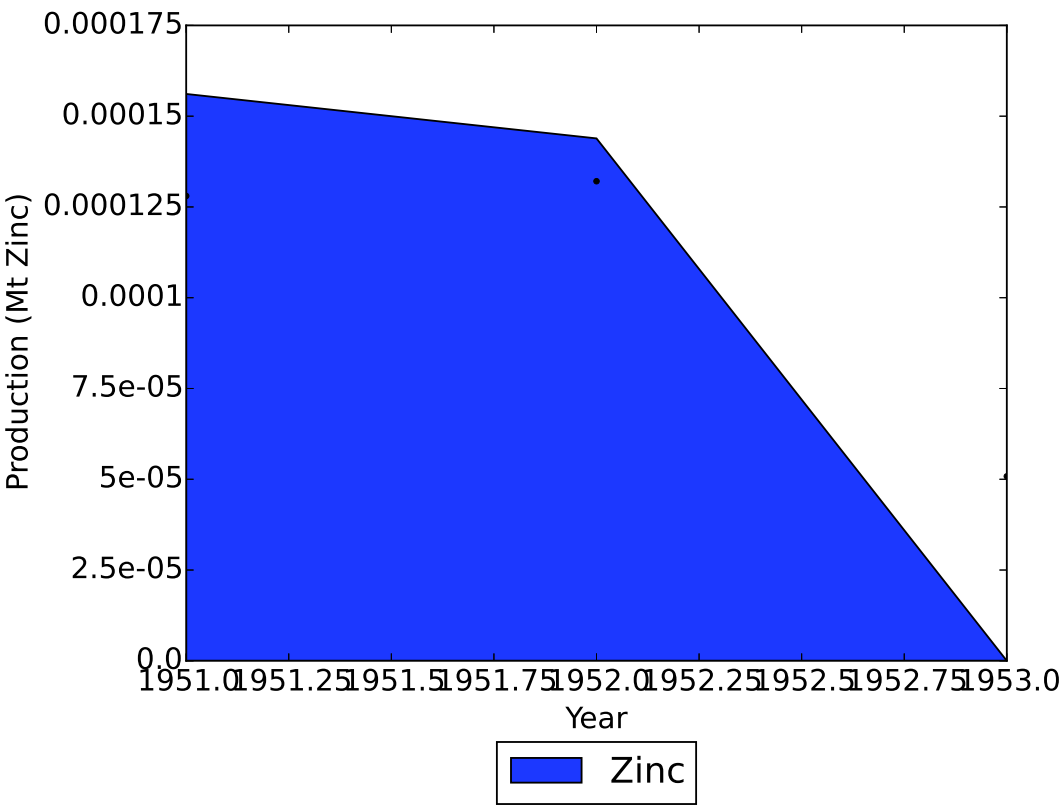

Figure 3.5: El Salvador projections capped at 16

Table 3.5: Peak years - All

| Name  | URR | Peak Year | Peak Rate |
|-------|-----|-----------|-----------|
| Zinc  | –   | 1951      | –         |
| Total | –   | 1951      | –         |

3.3.2 By Mineral

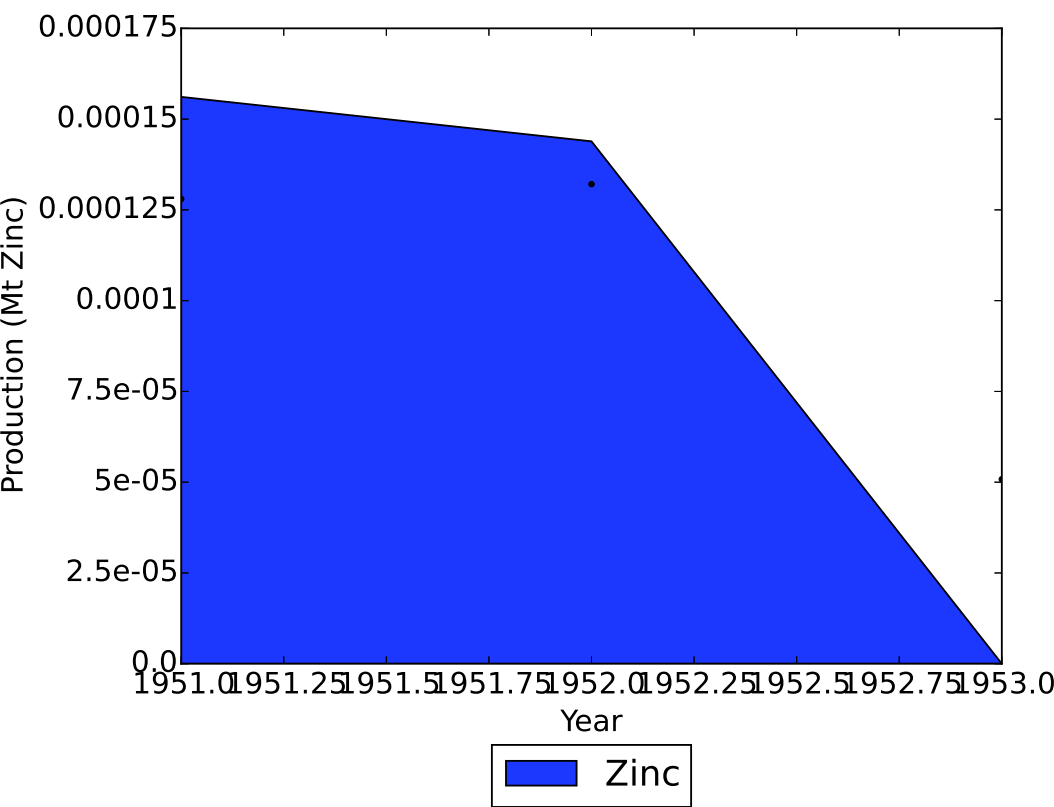

Figure 3.6: El Salvador projection by mineral type

| Table 3.6: Peak years - Minerals |     |           |           |
|----------------------------------|-----|-----------|-----------|
| Name                             | URR | Peak Year | Peak Rate |
| Zinc                             | –   | 1951      | –         |
| Total                            | –   | 1951      | –         |

## 3.4 Guatemala

### 3.4.1 All Projections

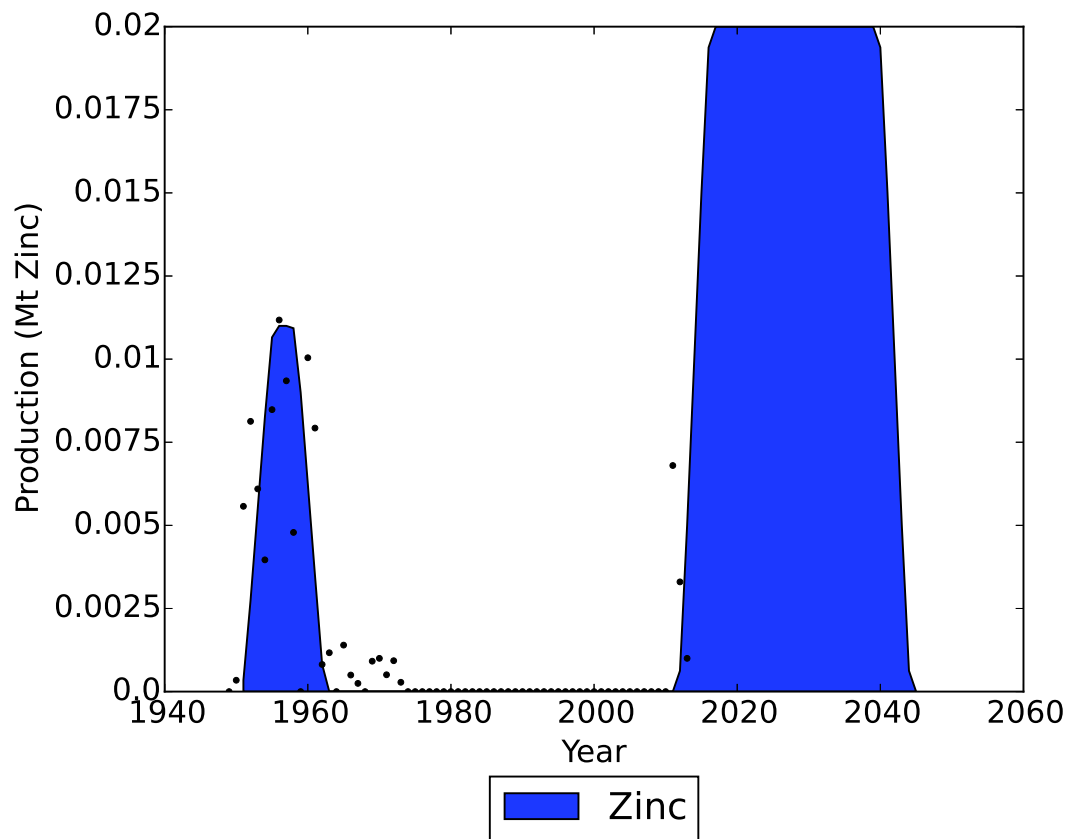

Figure 3.7: Guatemala projections capped at 16

| Table 3.7: Peak years - All |             |             |             |
|-----------------------------|-------------|-------------|-------------|
| Name                        | URR         | Peak Year   | Peak Rate   |
| Zinc                        | 0.64        | 2017        | 0.02        |
| <b>Total</b>                | <b>0.64</b> | <b>2017</b> | <b>0.02</b> |

3.4.2 By Mineral

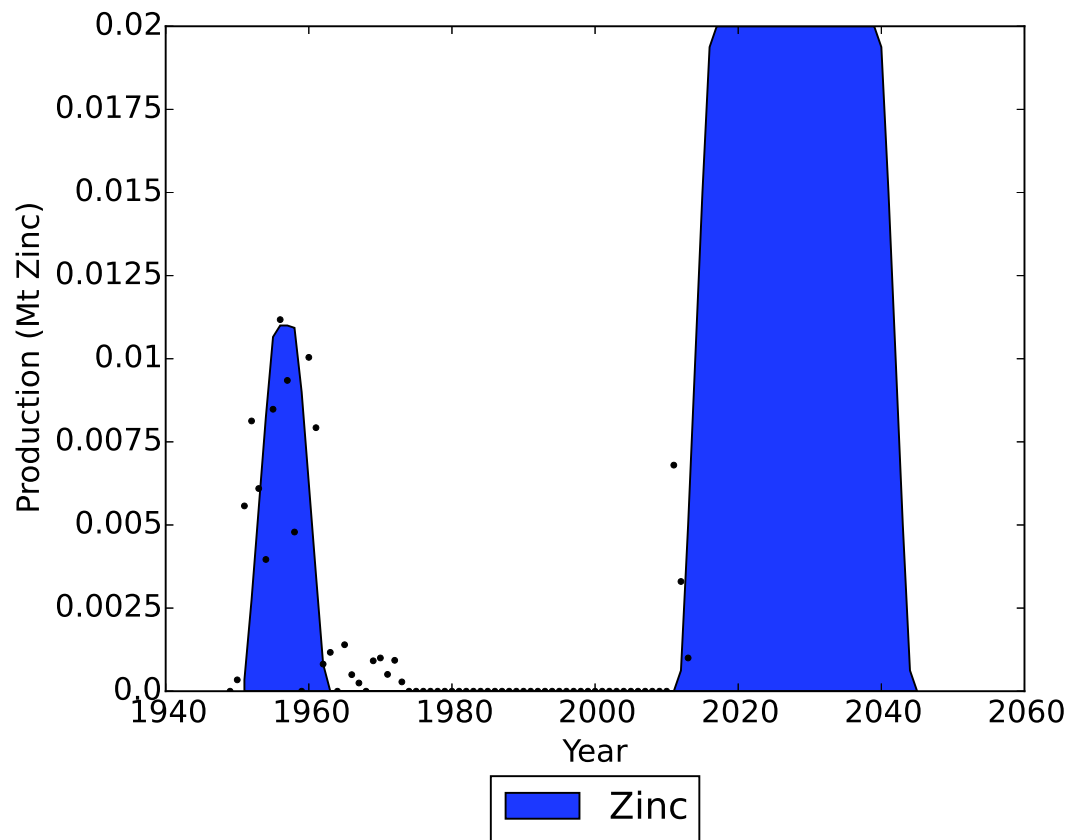

Figure 3.8: Guatemala projection by mineral type

| Table 3.8: Peak years - Minerals |      |           |           |
|----------------------------------|------|-----------|-----------|
| Name                             | URR  | Peak Year | Peak Rate |
| Zinc                             | 0.64 | 2017      | 0.02      |
| Total                            | 0.64 | 2017      | 0.02      |

## 3.5 Honduras

### 3.5.1 All Projections

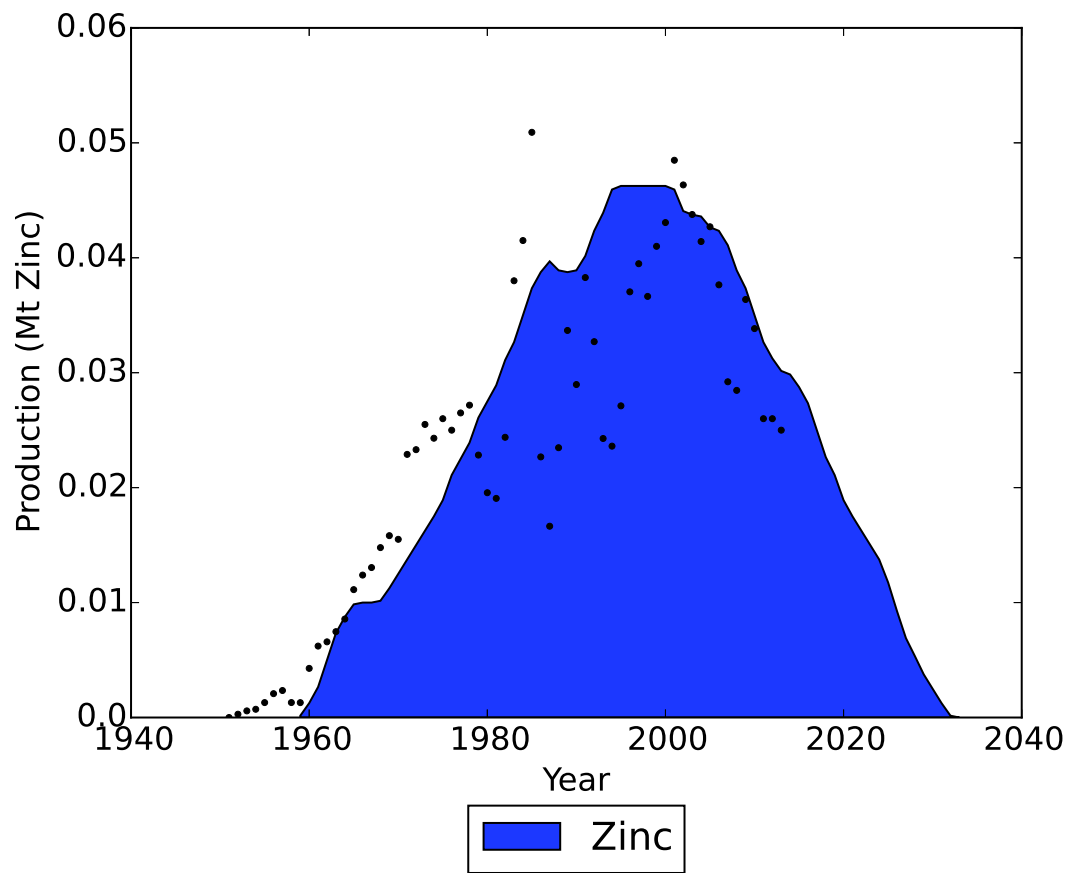

Figure 3.9: Honduras projections capped at 16

| Table 3.9: Peak years - All |             |             |             |
|-----------------------------|-------------|-------------|-------------|
| Name                        | URR         | Peak Year   | Peak Rate   |
| Zinc                        | 1.89        | 1995        | 0.05        |
| <b>Total</b>                | <b>1.89</b> | <b>1995</b> | <b>0.05</b> |



3.5.2 By Mineral

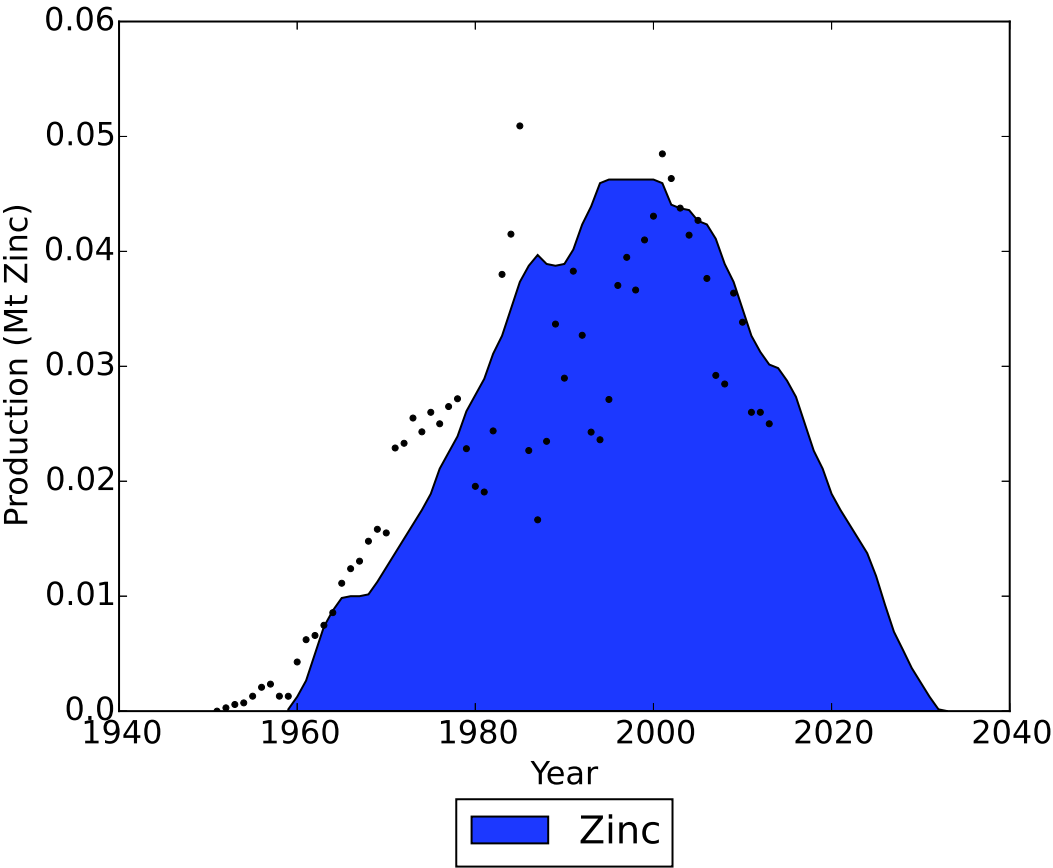

Figure 3.10: Honduras projection by mineral type

| Table 3.10: Peak years - Minerals |             |             |             |
|-----------------------------------|-------------|-------------|-------------|
| Name                              | URR         | Peak Year   | Peak Rate   |
| Zinc                              | 1.89        | 1995        | 0.05        |
| <b>Total</b>                      | <b>1.89</b> | <b>1995</b> | <b>0.05</b> |

3.6 Mexico

3.6.1 All Projections

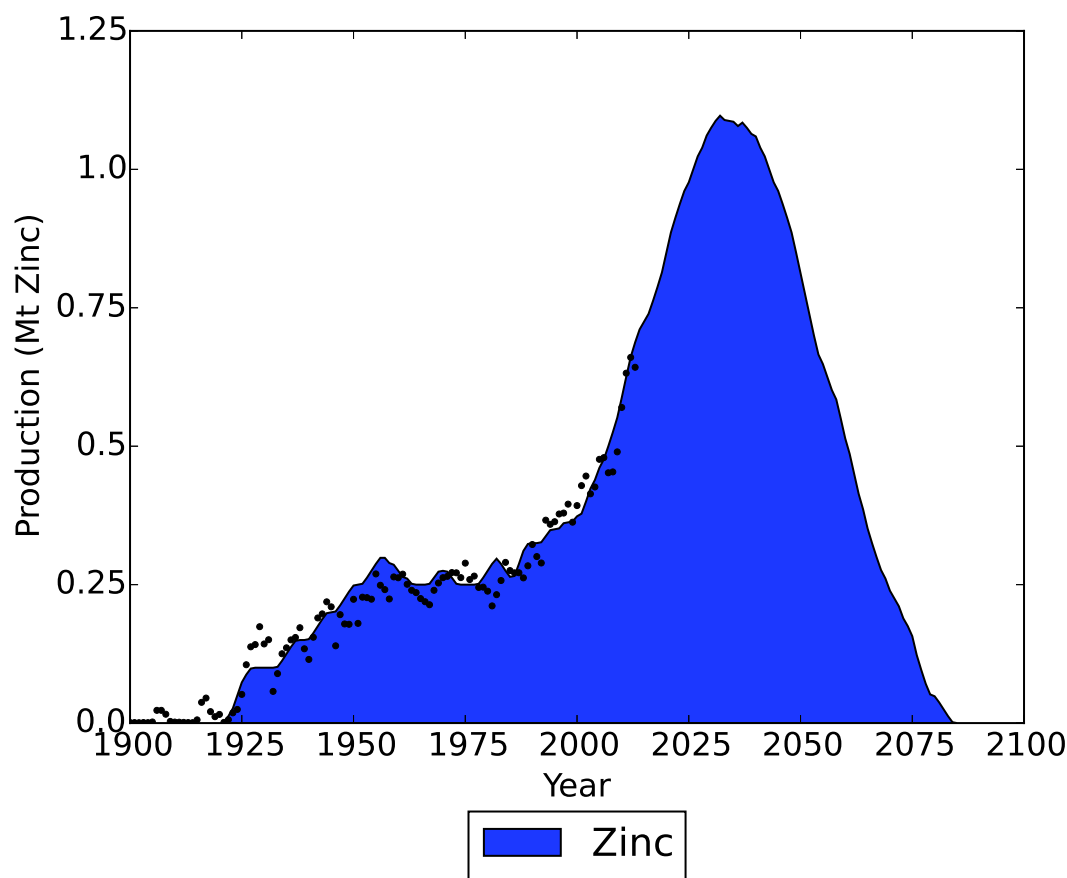

Figure 3.11: Mexico projections capped at 16

Table 3.11: Peak years - All

| Name  | URR   | Peak Year | Peak Rate |
|-------|-------|-----------|-----------|
| Zinc  | 71.84 | 2032      | 1.1       |
| Total | 71.84 | 2032      | 1.1       |

3.6.2 By Mineral

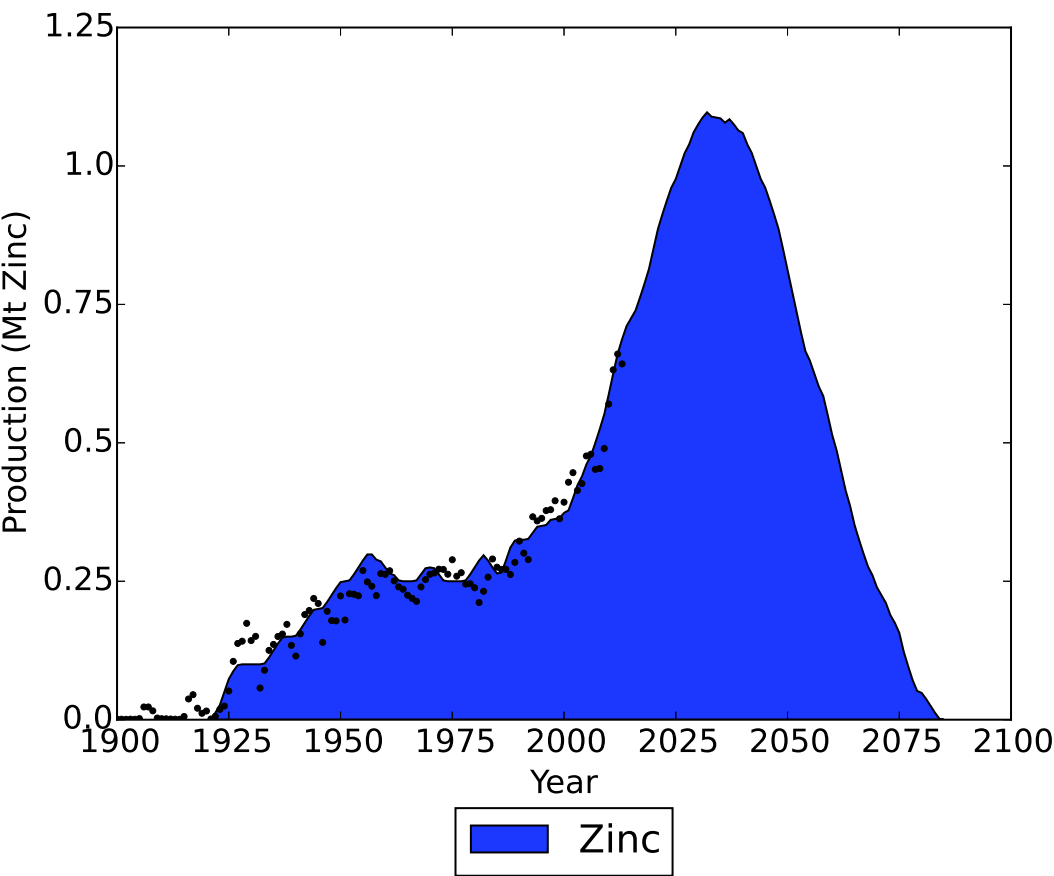

Figure 3.12: Mexico projection by mineral type

| Table 3.12: Peak years - Minerals |       |           |           |
|-----------------------------------|-------|-----------|-----------|
| Name                              | URR   | Peak Year | Peak Rate |
| Zinc                              | 71.84 | 2032      | 1.1       |
| Total                             | 71.84 | 2032      | 1.1       |

### 3.7 Nicaragua

#### 3.7.1 All Projections

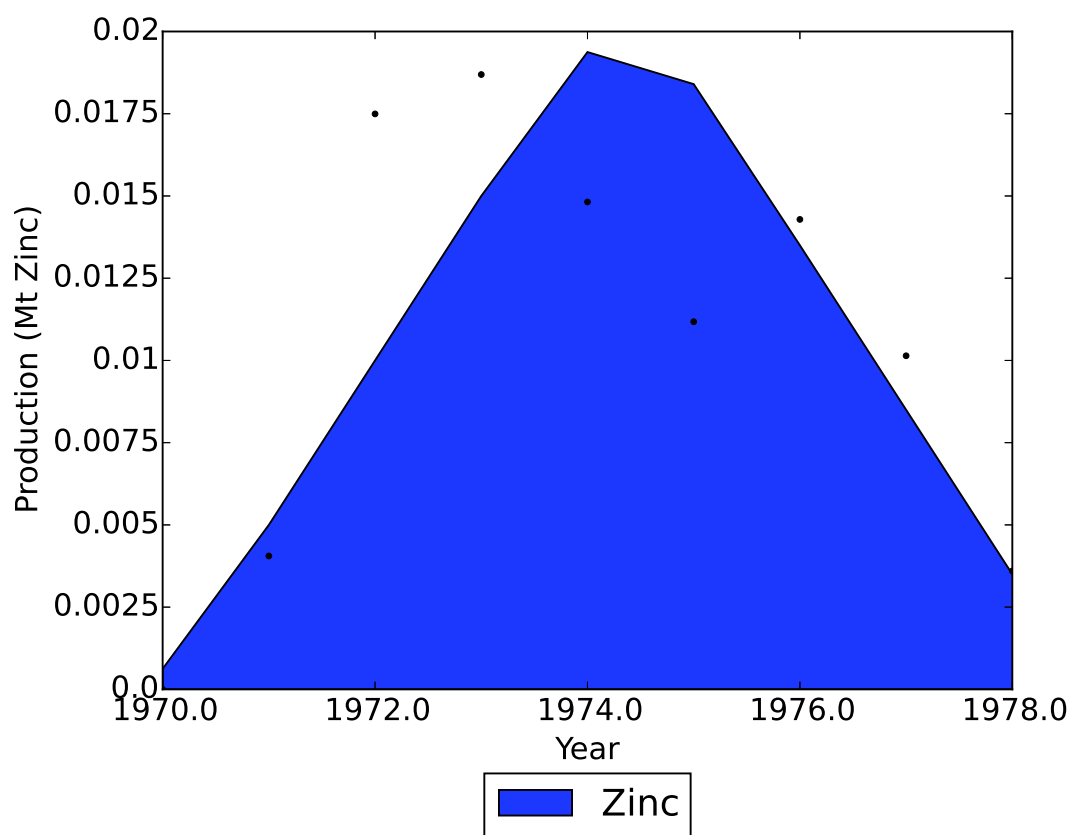

Figure 3.13: Nicaragua projections capped at 16

Table 3.13: Peak years - All

| Name  | URR  | Peak Year | Peak Rate |
|-------|------|-----------|-----------|
| Zinc  | 0.09 | 1974      | 0.02      |
| Total | 0.09 | 1974      | 0.02      |

3.7.2 By Mineral

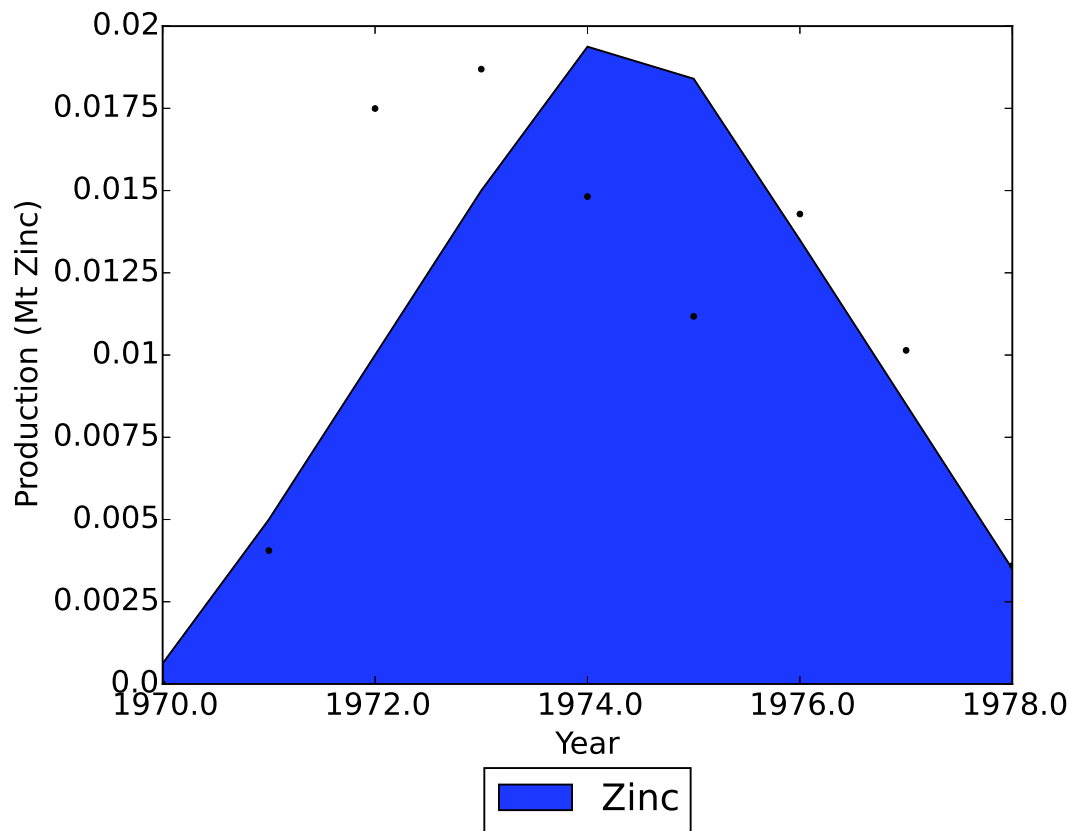

Figure 3.14: Nicaragua projection by mineral type

| Table 3.14: Peak years - Minerals |             |             |             |
|-----------------------------------|-------------|-------------|-------------|
| Name                              | URR         | Peak Year   | Peak Rate   |
| Zinc                              | 0.09        | 1974        | 0.02        |
| <b>Total</b>                      | <b>0.09</b> | <b>1974</b> | <b>0.02</b> |

3.8 Total

3.8.1 By country

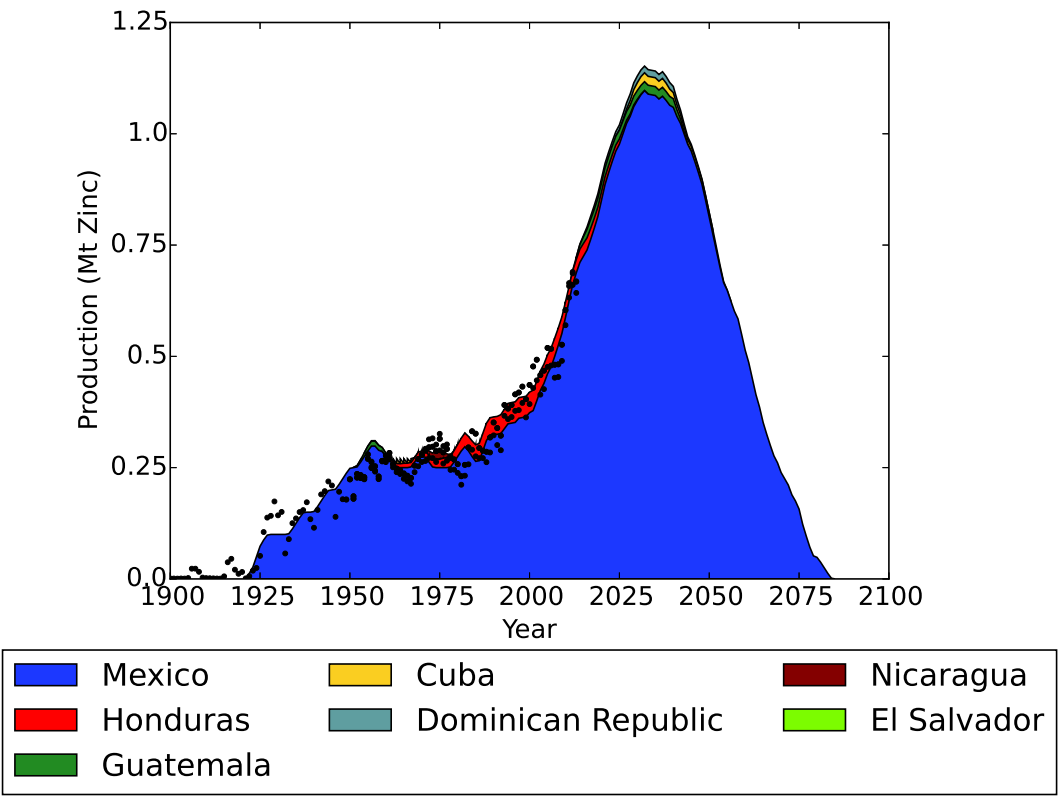

Figure 3.15: Central America projections by country

3.8.2 By mineral

Table 3.15: Peak years - All

| Name               | URR          | Peak Year   | Peak Rate   |
|--------------------|--------------|-------------|-------------|
| Mexico             | 71.84        | 2032        | 1.1         |
| Honduras           | 1.89         | 1995        | 0.05        |
| Guatemala          | 0.64         | 2017        | 0.02        |
| Cuba               | 0.37         | 2032        | 0.02        |
| Dominican Republic | 0.37         | 2029        | 0.02        |
| Nicaragua          | 0.09         | 1974        | 0.02        |
| El Salvador        | —            | 1951        | —           |
| <b>Total</b>       | <b>75.19</b> | <b>2032</b> | <b>1.15</b> |

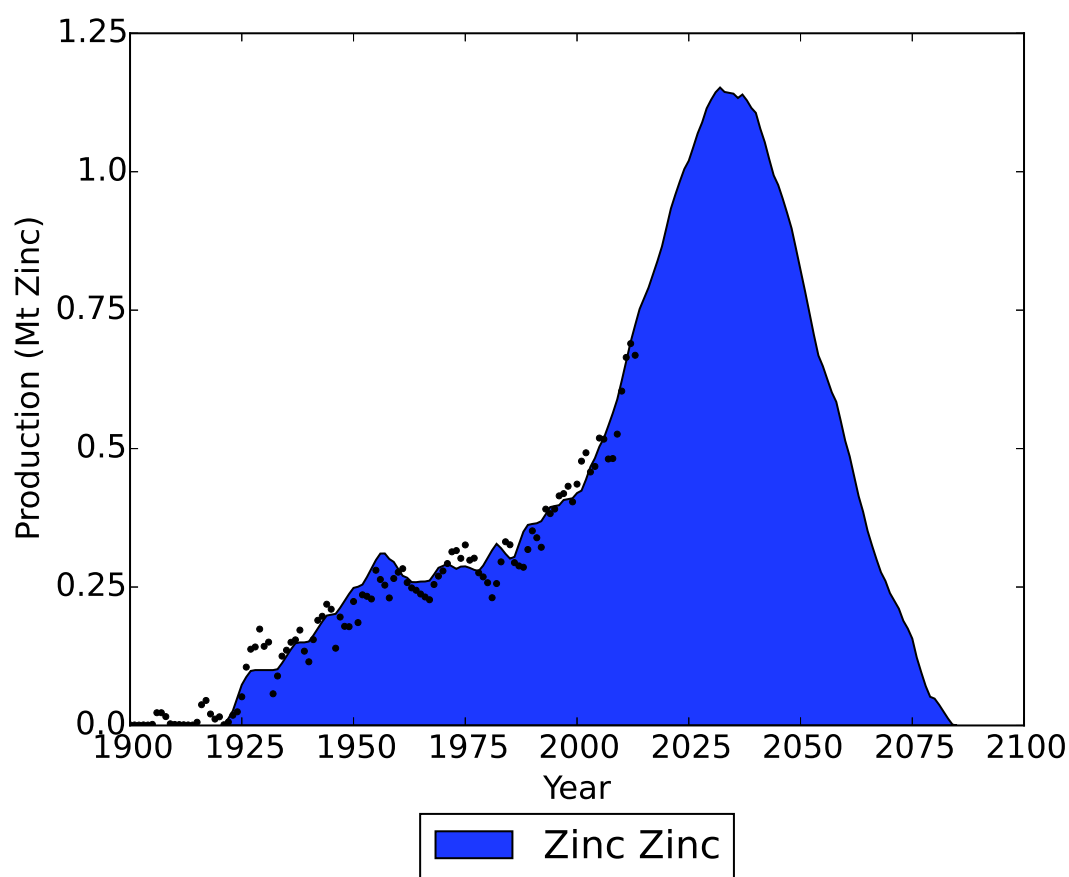

Figure 3.16: Central America projection by mineral type

Table 3.16: Peak years - Minerals

| Name         | URR          | Peak Year   | Peak Rate   |
|--------------|--------------|-------------|-------------|
| Zinc Zinc    | 75.19        | 2032        | 1.15        |
| <b>Total</b> | <b>75.19</b> | <b>2032</b> | <b>1.15</b> |

## Chapter 4

# Europe

### 4.1 Austria

#### 4.1.1 All Projections

Table 4.1: Peak years - All

| <b>Name</b>  | <b>URR</b> | <b>Peak Year</b> | <b>Peak Rate</b> |
|--------------|------------|------------------|------------------|
| Zinc         | 1.1        | 1977             | 0.02             |
| <b>Total</b> | <b>1.1</b> | <b>1977</b>      | <b>0.02</b>      |



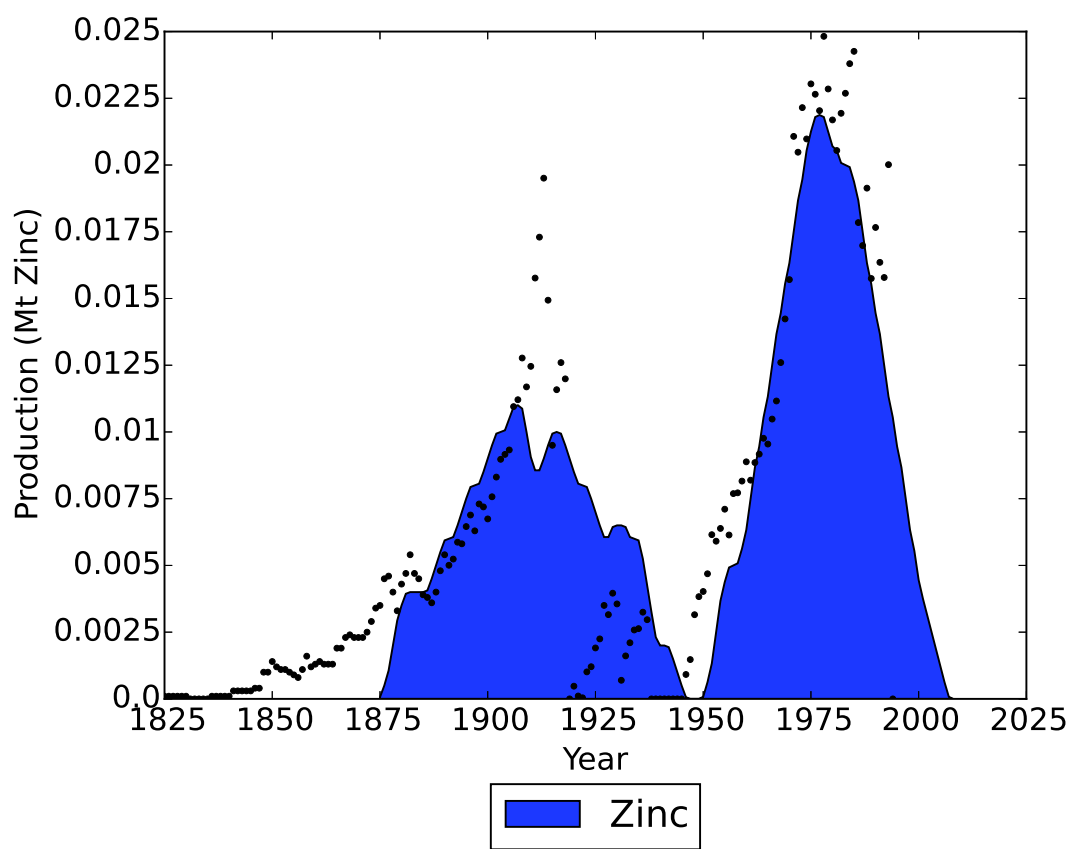

Figure 4.1: Austria projections capped at 16

4.1.2 By Mineral

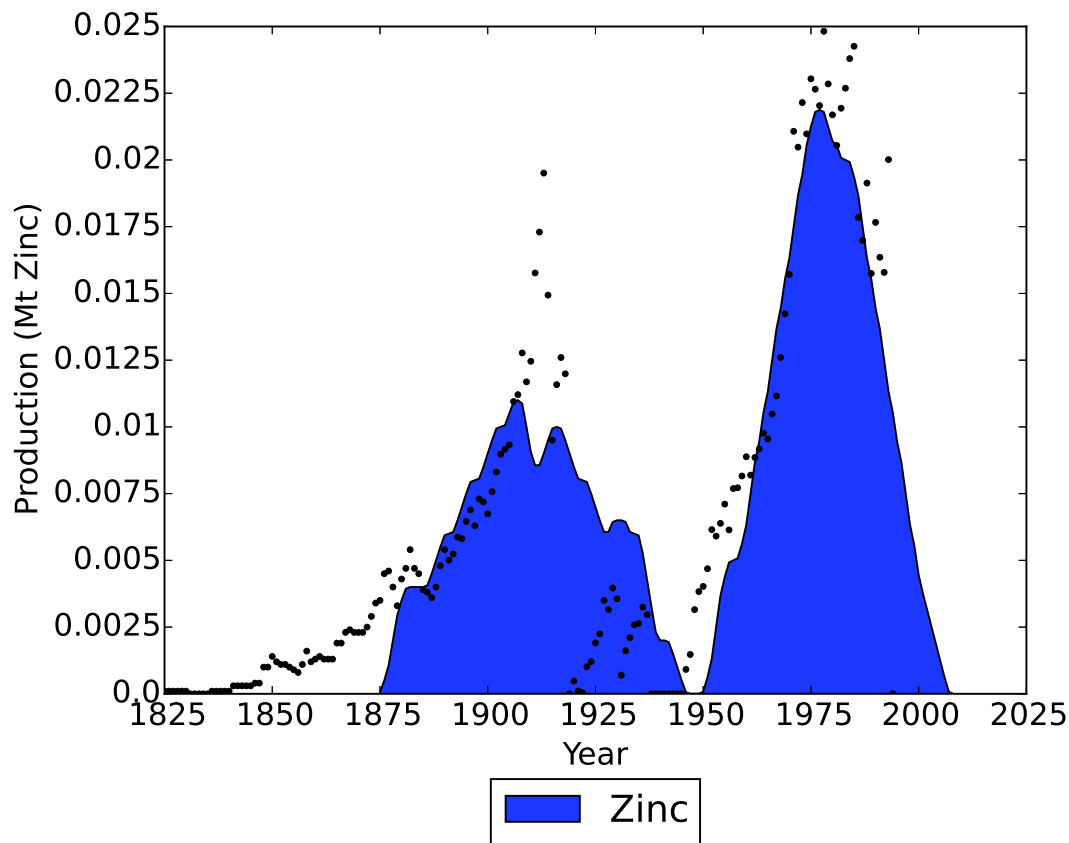

Figure 4.2: Austria projection by mineral type

| Table 4.2: Peak years - Minerals |     |           |           |
|----------------------------------|-----|-----------|-----------|
| Name                             | URR | Peak Year | Peak Rate |
| Zinc                             | 1.1 | 1977      | 0.02      |
| Total                            | 1.1 | 1977      | 0.02      |

# 4.2 Belgium

## 4.2.1 All Projections

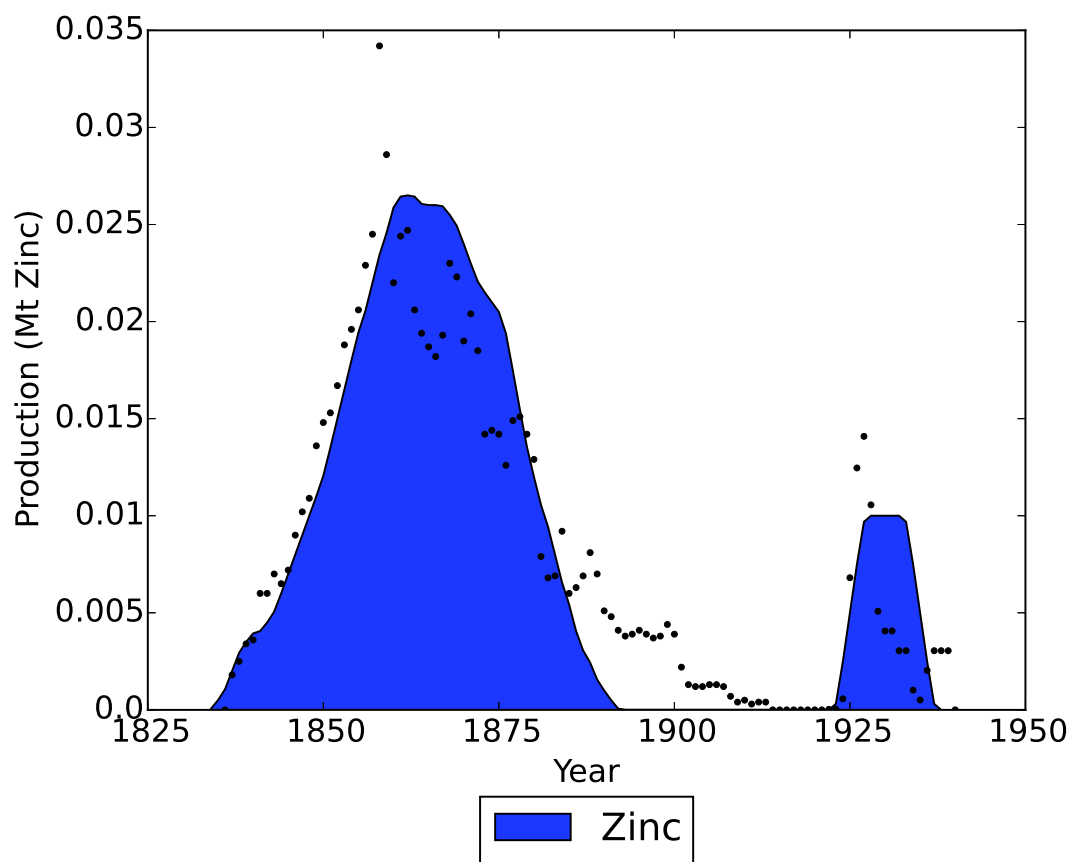

Figure 4.3: Belgium projections capped at 16

| Table 4.3: Peak years - All |      |           |           |
|-----------------------------|------|-----------|-----------|
| Name                        | URR  | Peak Year | Peak Rate |
| Zinc                        | 0.89 | 1862      | 0.03      |
| Total                       | 0.89 | 1862      | 0.03      |

4.2.2 By Mineral

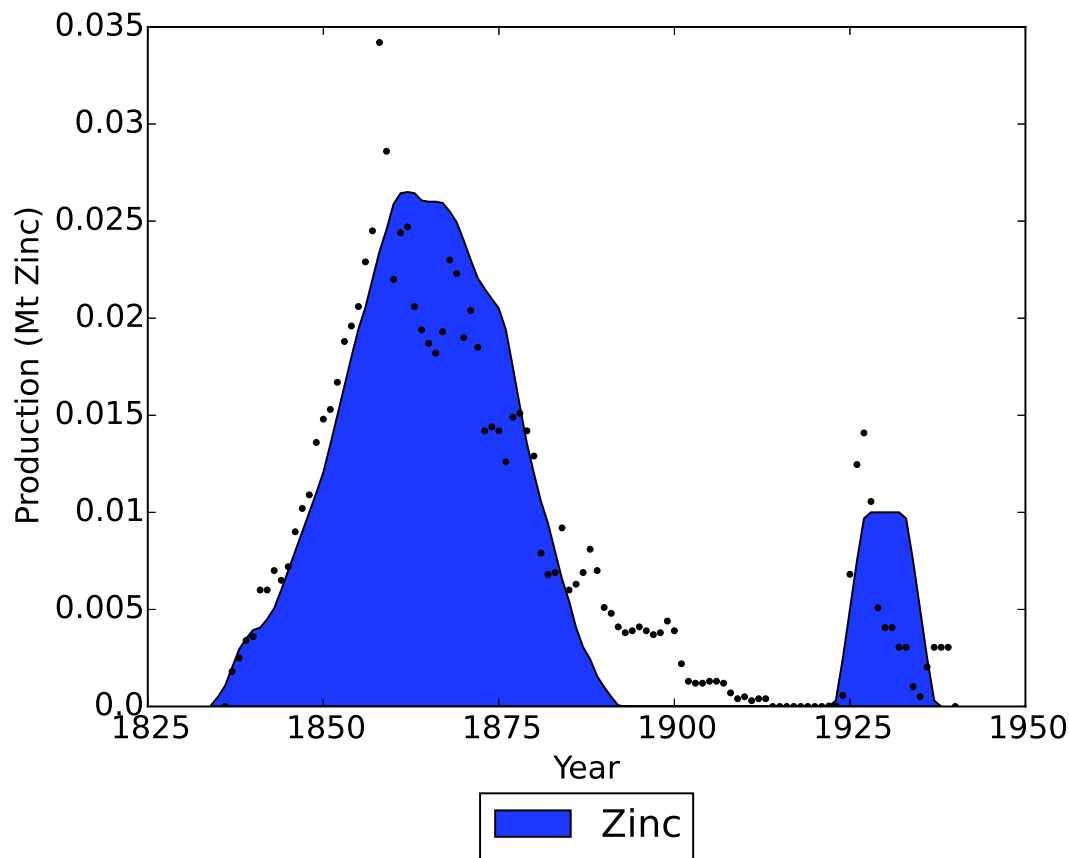

Figure 4.4: Belgium projection by mineral type

| Table 4.4: Peak years - Minerals |             |             |             |
|----------------------------------|-------------|-------------|-------------|
| Name                             | URR         | Peak Year   | Peak Rate   |
| Zinc                             | 0.89        | 1862        | 0.03        |
| <b>Total</b>                     | <b>0.89</b> | <b>1862</b> | <b>0.03</b> |

### 4.3 Bosnia and Herzegovina

#### 4.3.1 All Projections

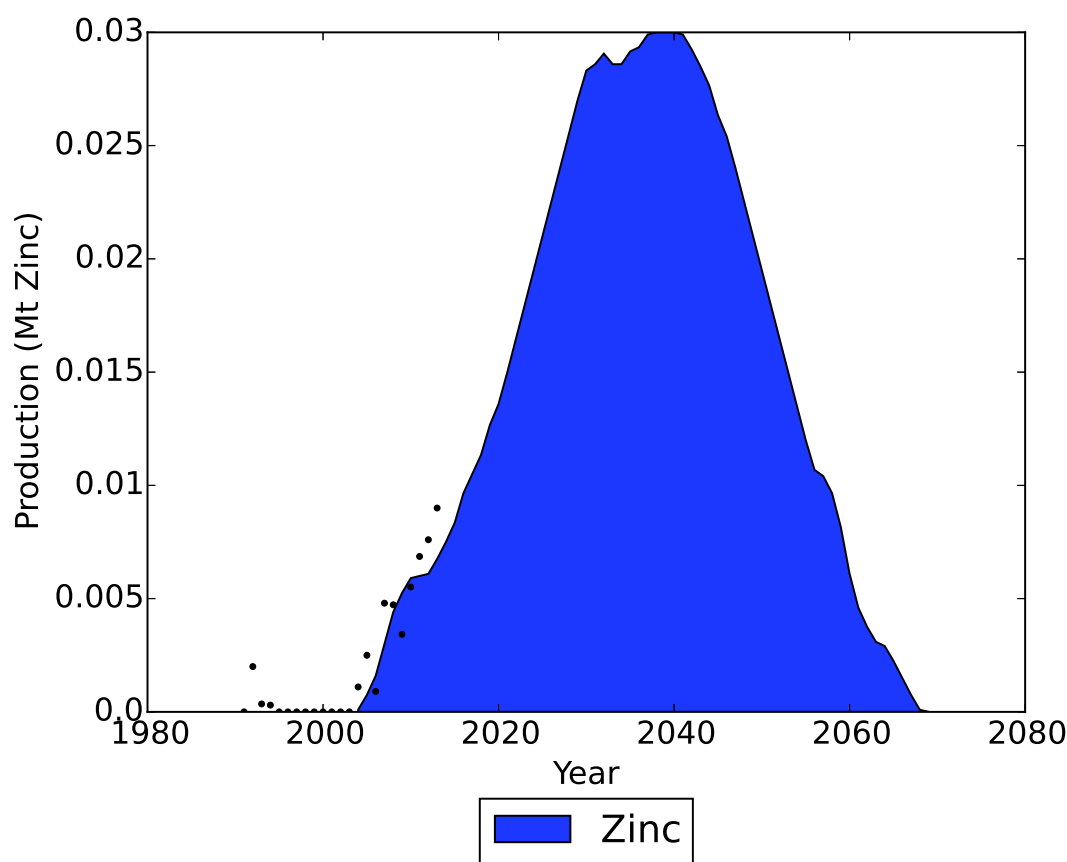

Figure 4.5: Bosnia and Herzegovina projections capped at 16

| Table 4.5: Peak years - All |      |           |           |
|-----------------------------|------|-----------|-----------|
| Name                        | URR  | Peak Year | Peak Rate |
| Zinc                        | 1.02 | 2038      | 0.03      |
| Total                       | 1.02 | 2038      | 0.03      |

4.3.2 By Mineral

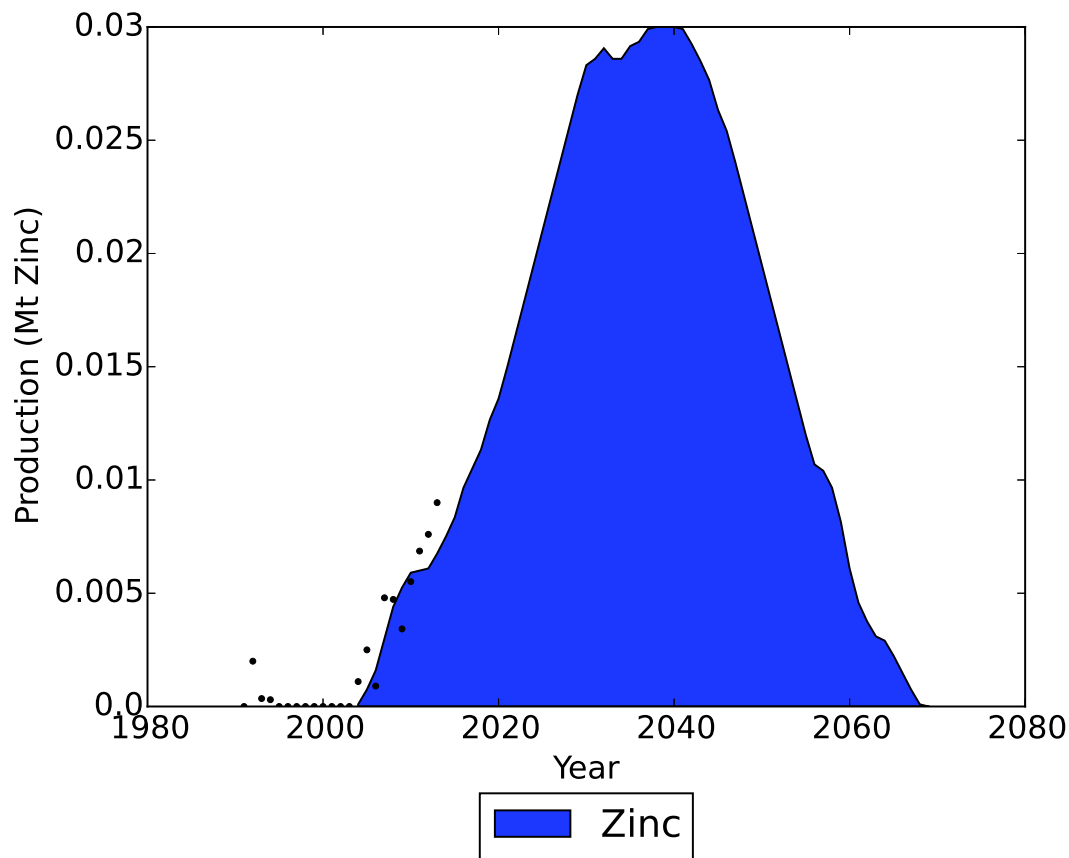

Figure 4.6: Bosnia and Herzegovina projection by mineral type

| Table 4.6: Peak years - Minerals |             |             |             |
|----------------------------------|-------------|-------------|-------------|
| Name                             | URR         | Peak Year   | Peak Rate   |
| Zinc                             | 1.02        | 2038        | 0.03        |
| <b>Total</b>                     | <b>1.02</b> | <b>2038</b> | <b>0.03</b> |

# 4.4 Bulgaria

## 4.4.1 All Projections

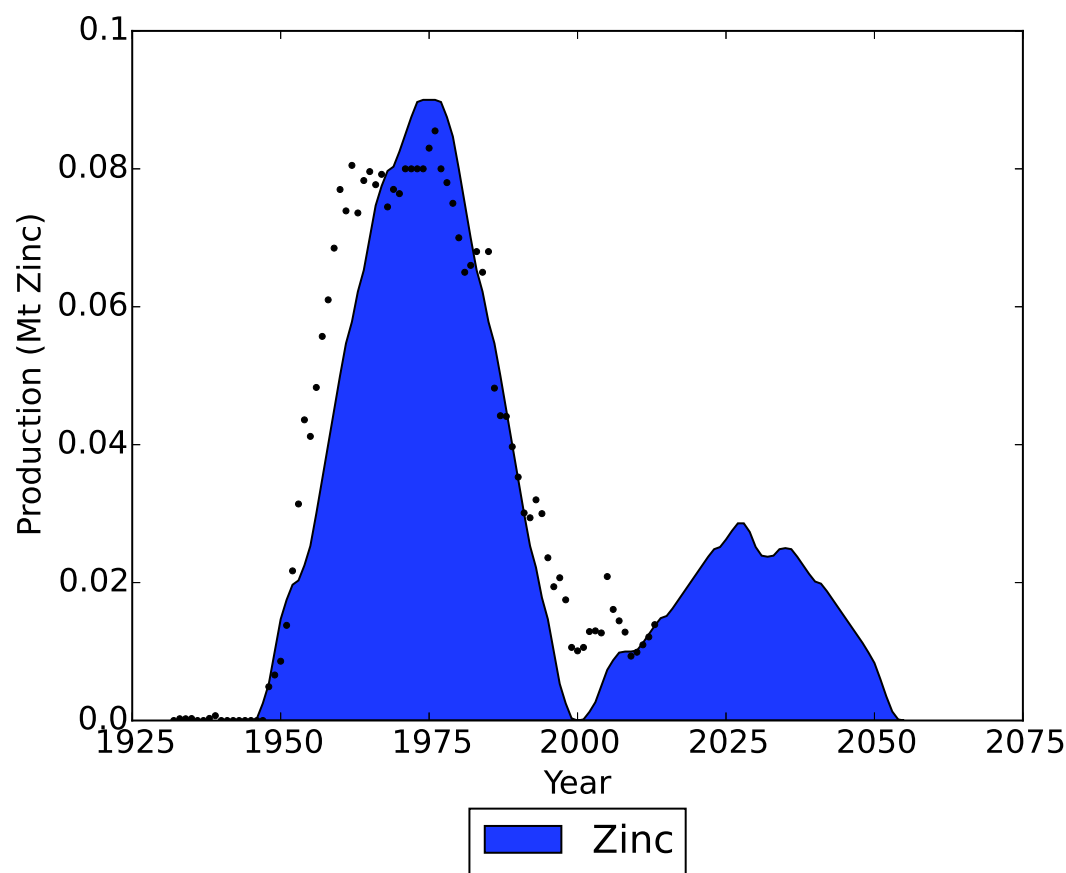

Figure 4.7: Bulgaria projections capped at 16

| Table 4.7: Peak years - All |      |           |           |
|-----------------------------|------|-----------|-----------|
| Name                        | URR  | Peak Year | Peak Rate |
| Zinc                        | 3.47 | 1974      | 0.09      |
| Total                       | 3.47 | 1974      | 0.09      |

4.4.2 By Mineral

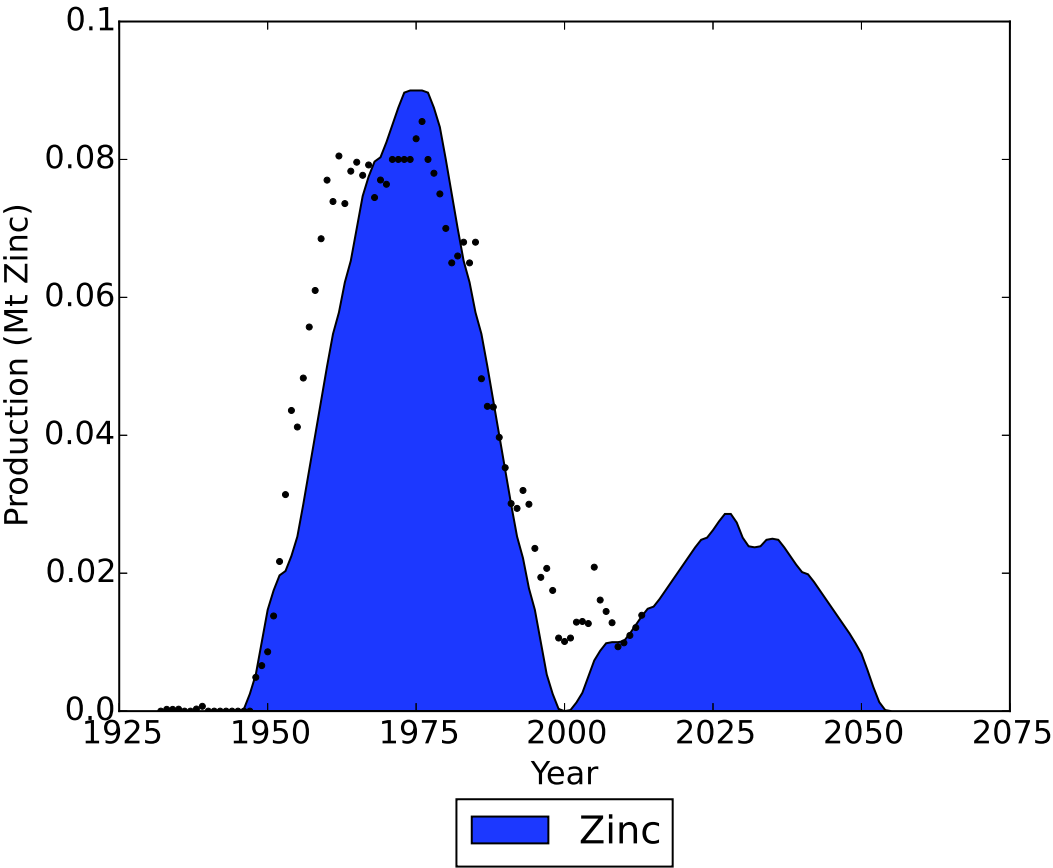

Figure 4.8: Bulgaria projection by mineral type

| Table 4.8: Peak years - Minerals |      |           |           |
|----------------------------------|------|-----------|-----------|
| Name                             | URR  | Peak Year | Peak Rate |
| Zinc                             | 3.47 | 1974      | 0.09      |
| Total                            | 3.47 | 1974      | 0.09      |



# 4.5 Czechoslovakia

## 4.5.1 All Projections

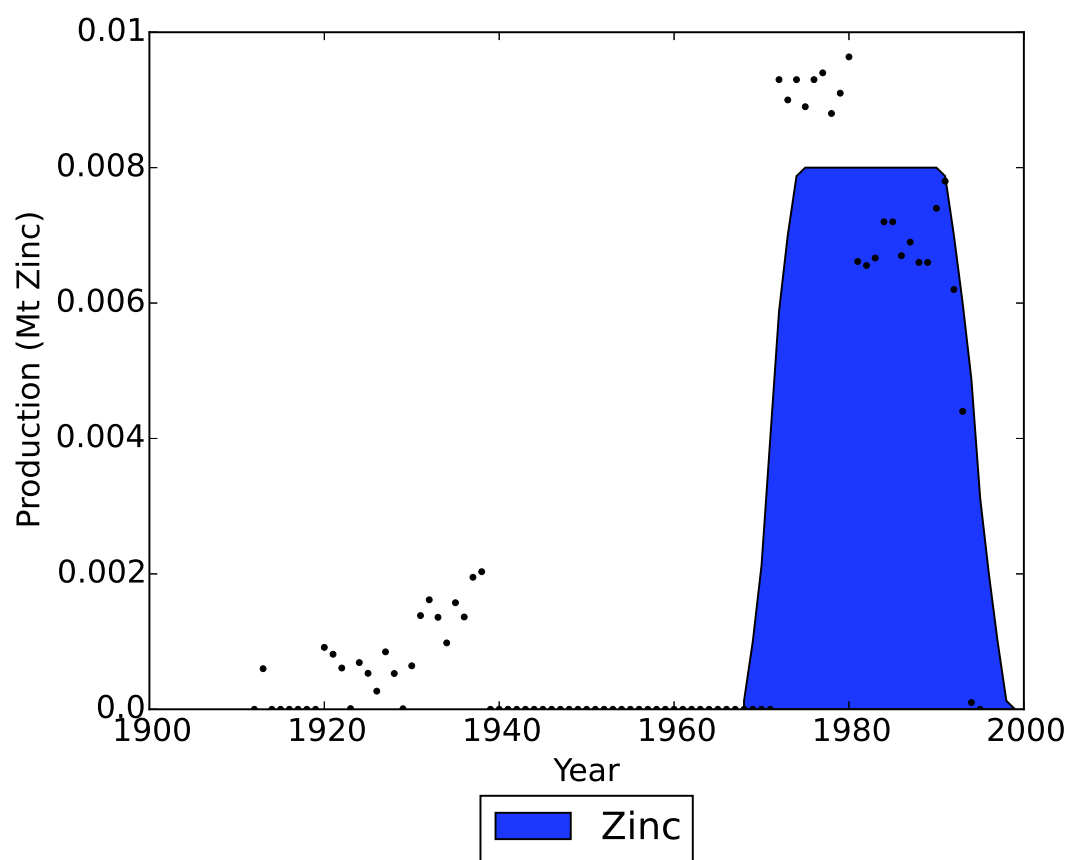

Figure 4.9: Czechoslovakia projections capped at 16

| Table 4.9: Peak years - All |             |             |             |
|-----------------------------|-------------|-------------|-------------|
| Name                        | URR         | Peak Year   | Peak Rate   |
| Zinc                        | 0.19        | 1975        | 0.01        |
| <b>Total</b>                | <b>0.19</b> | <b>1975</b> | <b>0.01</b> |

4.5.2 By Mineral

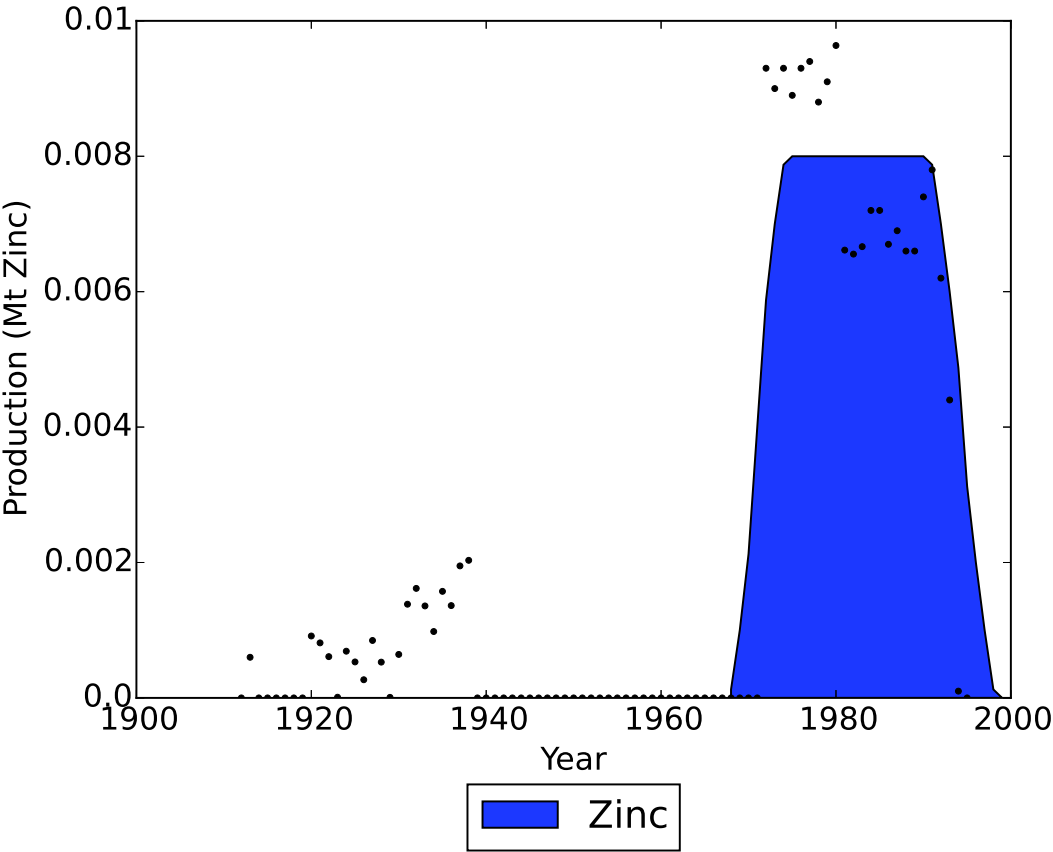

Figure 4.10: Czechoslovakia projection by mineral type

| Table 4.10: Peak years - Minerals |      |           |           |
|-----------------------------------|------|-----------|-----------|
| Name                              | URR  | Peak Year | Peak Rate |
| Zinc                              | 0.19 | 1975      | 0.01      |
| Total                             | 0.19 | 1975      | 0.01      |

# 4.6 Finland

## 4.6.1 All Projections

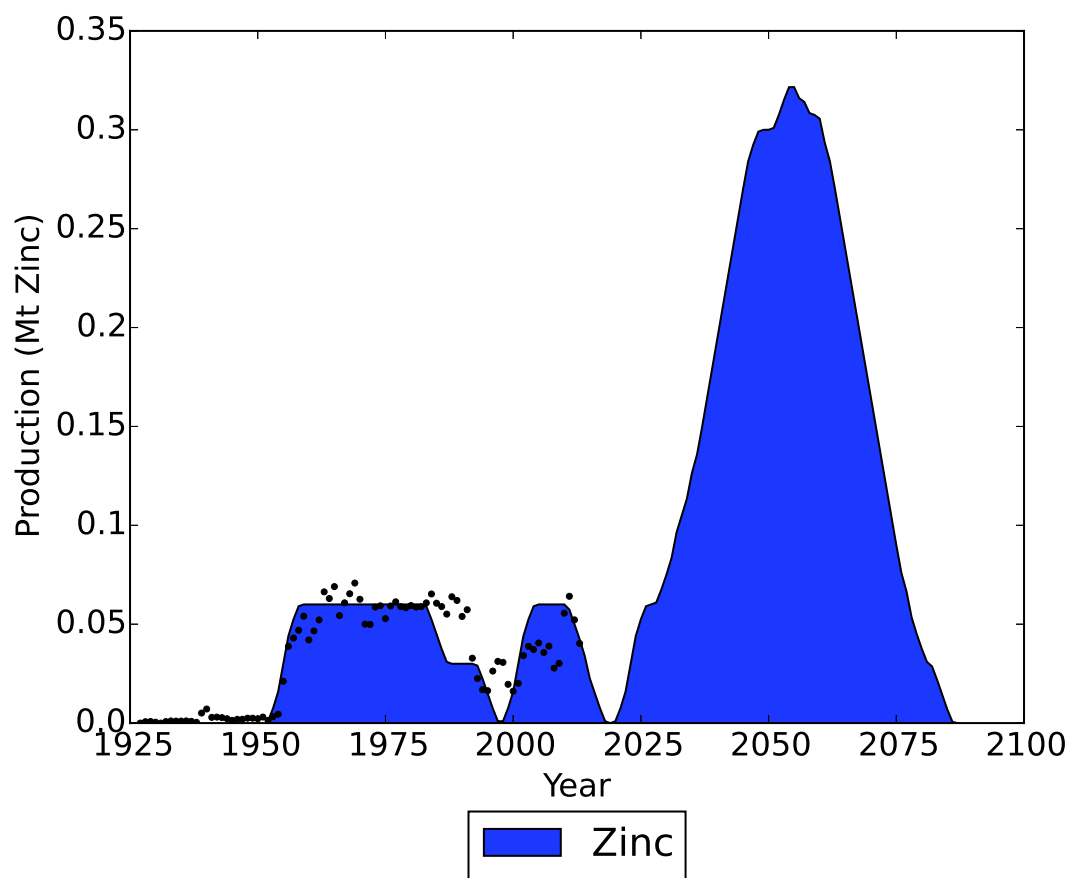

Figure 4.11: Finland projections capped at 16

| Table 4.11: Peak years - All |       |           |           |
|------------------------------|-------|-----------|-----------|
| Name                         | URR   | Peak Year | Peak Rate |
| Zinc                         | 13.82 | 2054      | 0.32      |
| Total                        | 13.82 | 2054      | 0.32      |

4.6.2 By Mineral

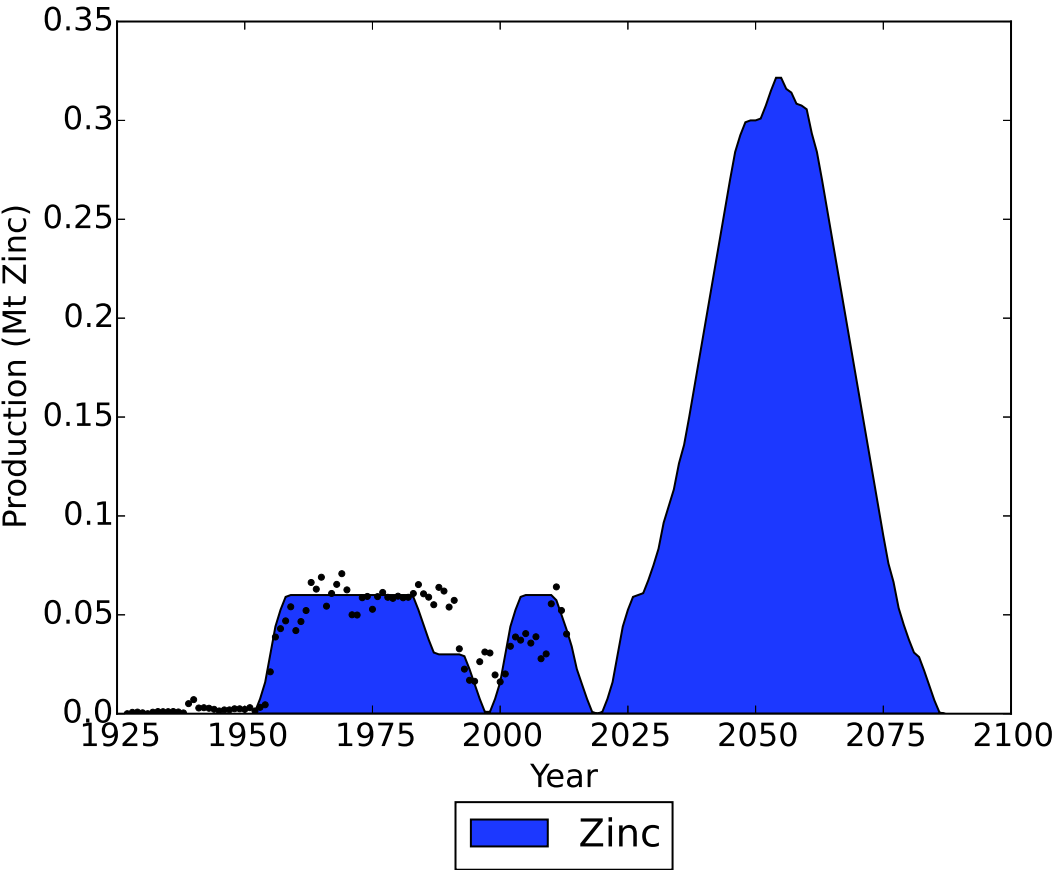

Figure 4.12: Finland projection by mineral type

| Table 4.12: Peak years - Minerals |       |           |           |
|-----------------------------------|-------|-----------|-----------|
| Name                              | URR   | Peak Year | Peak Rate |
| Zinc                              | 13.82 | 2054      | 0.32      |
| Total                             | 13.82 | 2054      | 0.32      |

4.7 France

4.7.1 All Projections

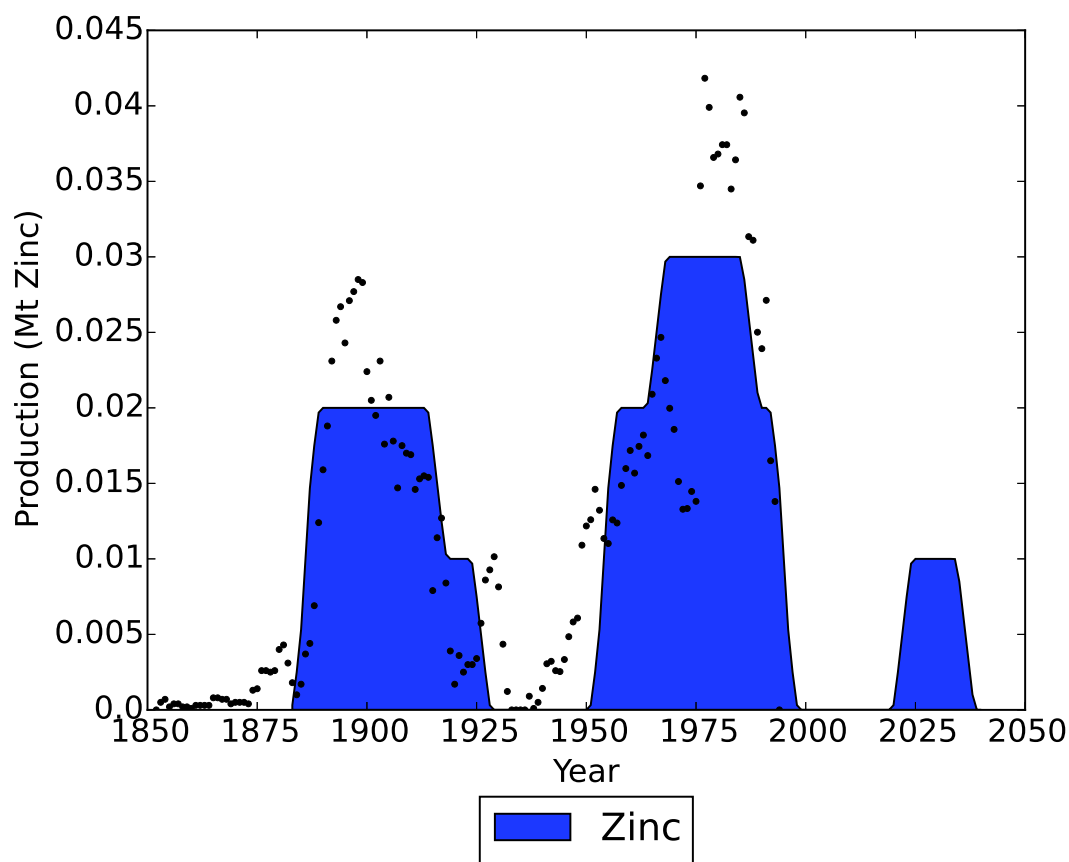

Figure 4.13: France projections capped at 16

Table 4.13: Peak years - All

| Name  | URR  | Peak Year | Peak Rate |
|-------|------|-----------|-----------|
| Zinc  | 1.88 | 1969      | 0.03      |
| Total | 1.88 | 1969      | 0.03      |

4.7.2 By Mineral

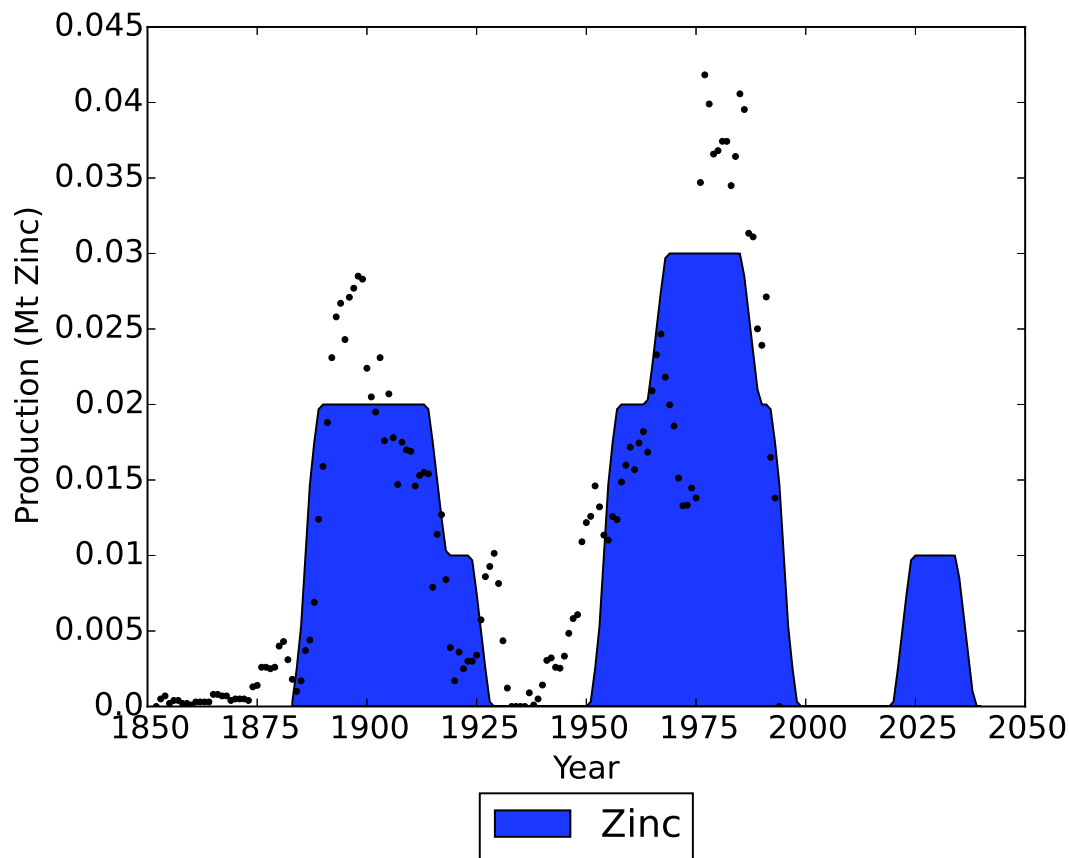

Figure 4.14: France projection by mineral type

| Table 4.14: Peak years - Minerals |      |           |           |
|-----------------------------------|------|-----------|-----------|
| Name                              | URR  | Peak Year | Peak Rate |
| Zinc                              | 1.88 | 1969      | 0.03      |
| Total                             | 1.88 | 1969      | 0.03      |

4.8 Germany

4.8.1 All Projections

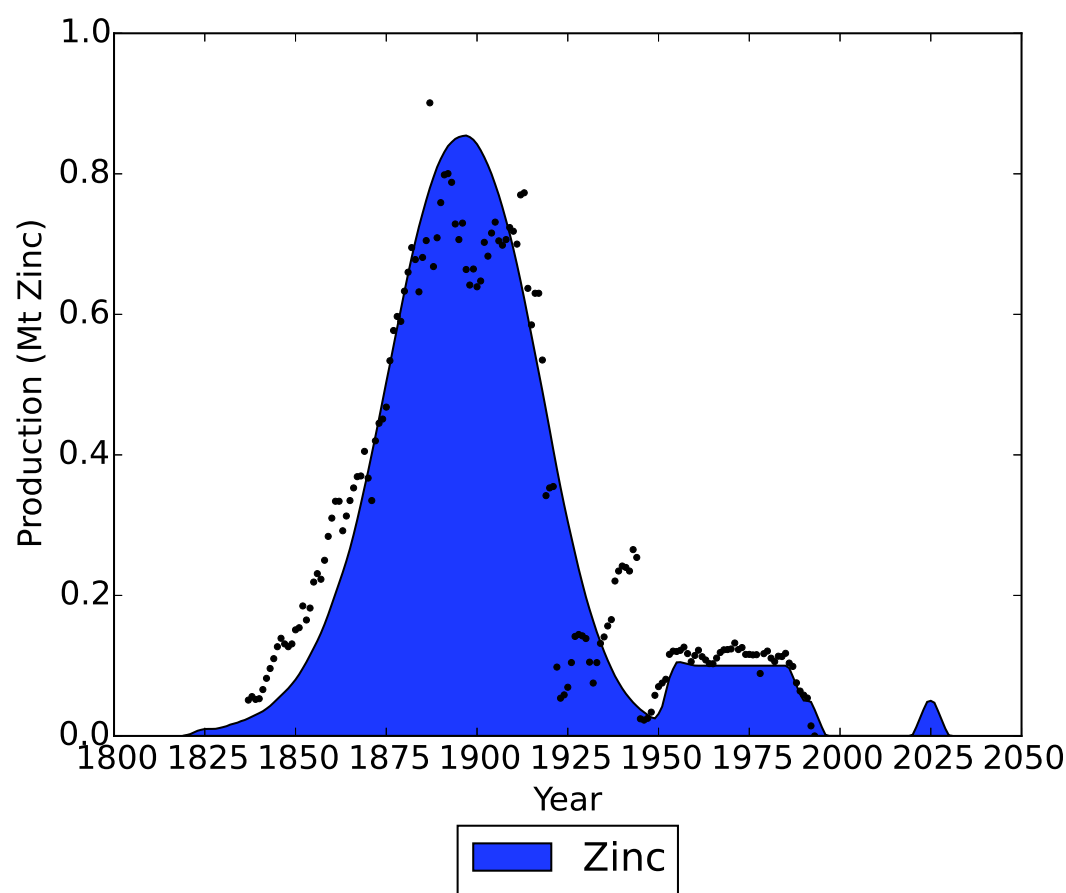

Figure 4.15: Germany projections capped at 16

| Table 4.15: Peak years - All |       |           |           |
|------------------------------|-------|-----------|-----------|
| Name                         | URR   | Peak Year | Peak Rate |
| Zinc                         | 48.18 | 1897      | 0.85      |
| Total                        | 48.18 | 1897      | 0.85      |

4.8.2 By Mineral

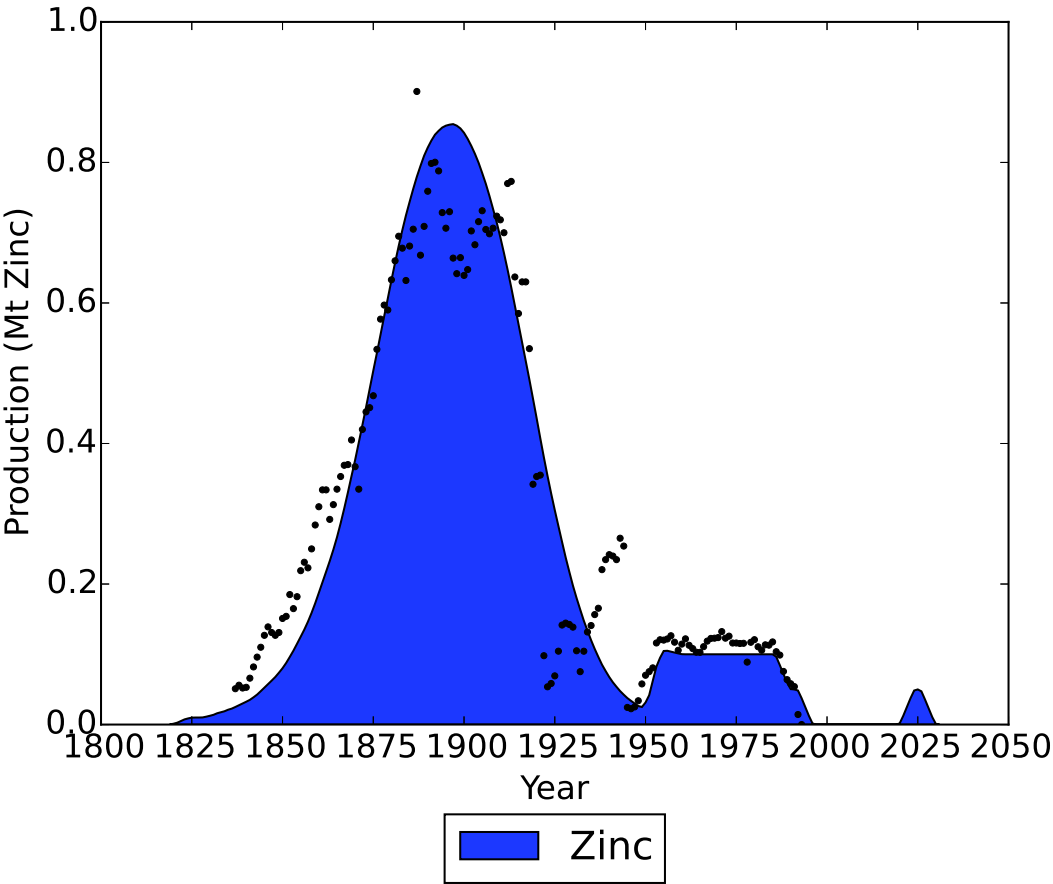

Figure 4.16: Germany projection by mineral type

| Table 4.16: Peak years - Minerals |              |             |             |
|-----------------------------------|--------------|-------------|-------------|
| Name                              | URR          | Peak Year   | Peak Rate   |
| Zinc                              | 48.18        | 1897        | 0.85        |
| <b>Total</b>                      | <b>48.18</b> | <b>1897</b> | <b>0.85</b> |



4.9 Greece

4.9.1 All Projections

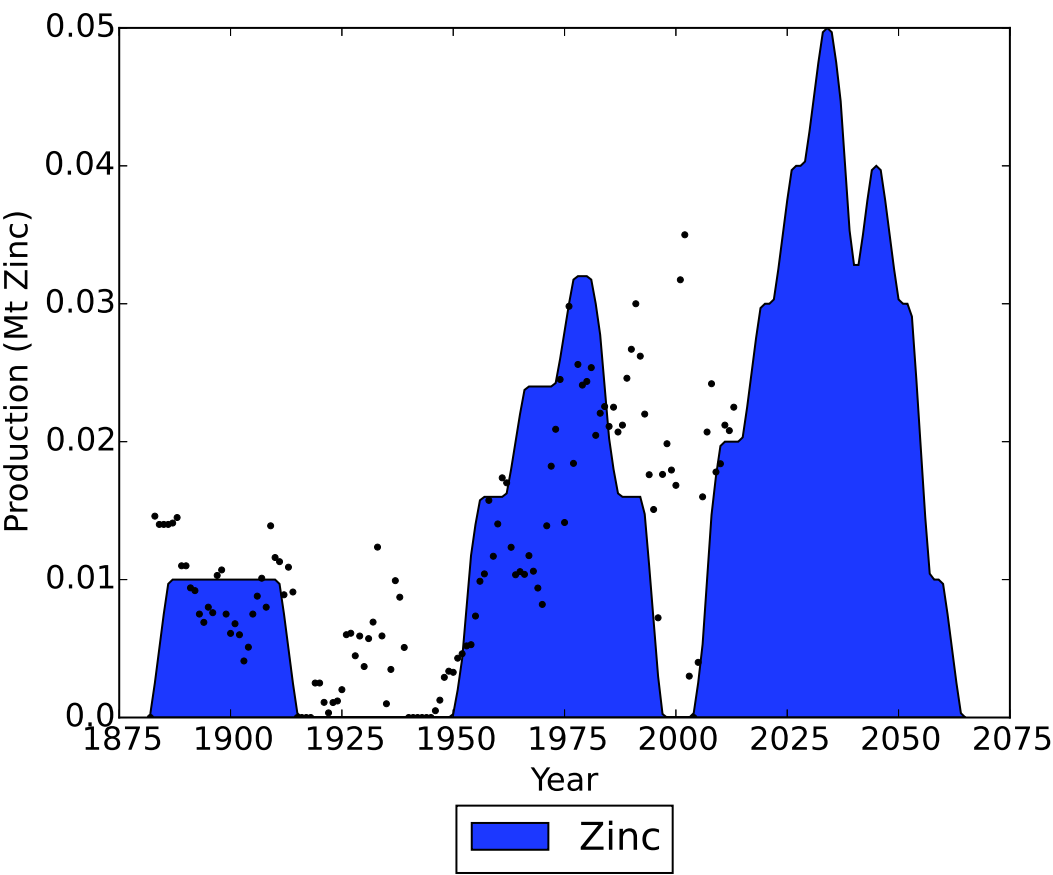

Figure 4.17: Greece projections capped at 16

| Table 4.17: Peak years - All |      |           |           |
|------------------------------|------|-----------|-----------|
| Name                         | URR  | Peak Year | Peak Rate |
| Zinc                         | 2.87 | 2034      | 0.05      |
| Total                        | 2.87 | 2034      | 0.05      |

4.9.2 By Mineral

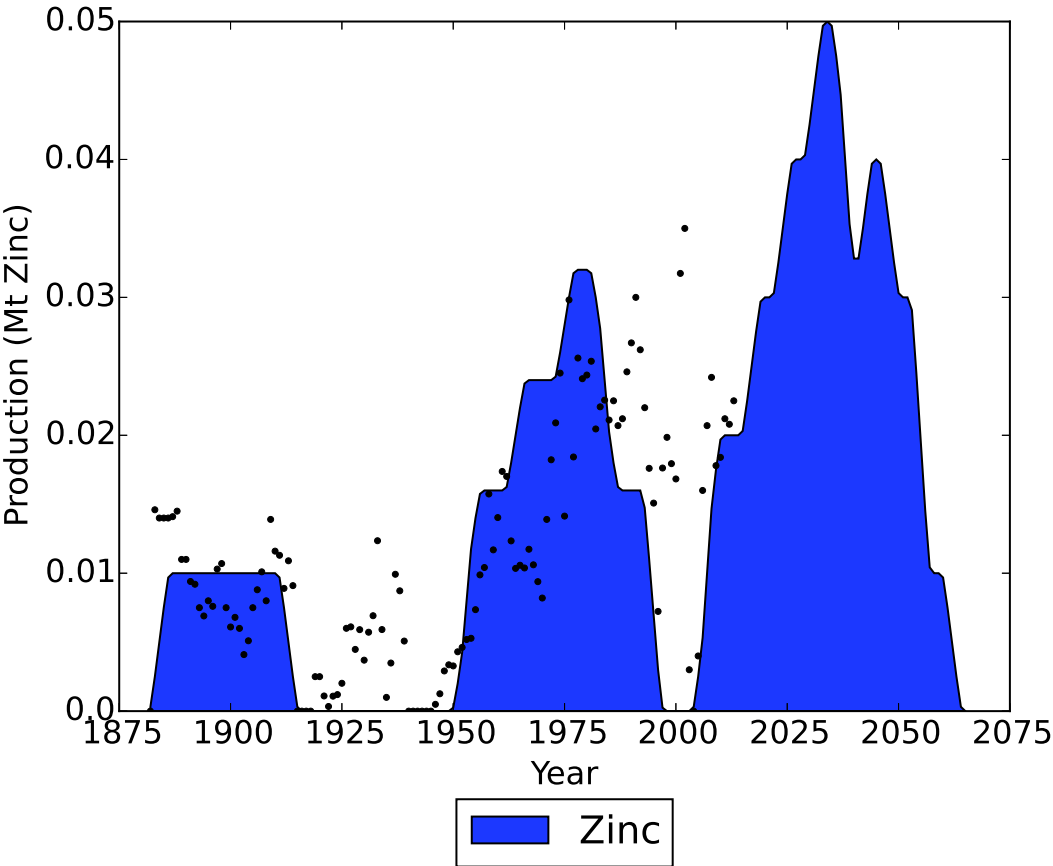

Figure 4.18: Greece projection by mineral type

| Table 4.18: Peak years - Minerals |      |           |           |
|-----------------------------------|------|-----------|-----------|
| Name                              | URR  | Peak Year | Peak Rate |
| Zinc                              | 2.87 | 2034      | 0.05      |
| Total                             | 2.87 | 2034      | 0.05      |

4.10 Greenland

4.10.1 All Projections

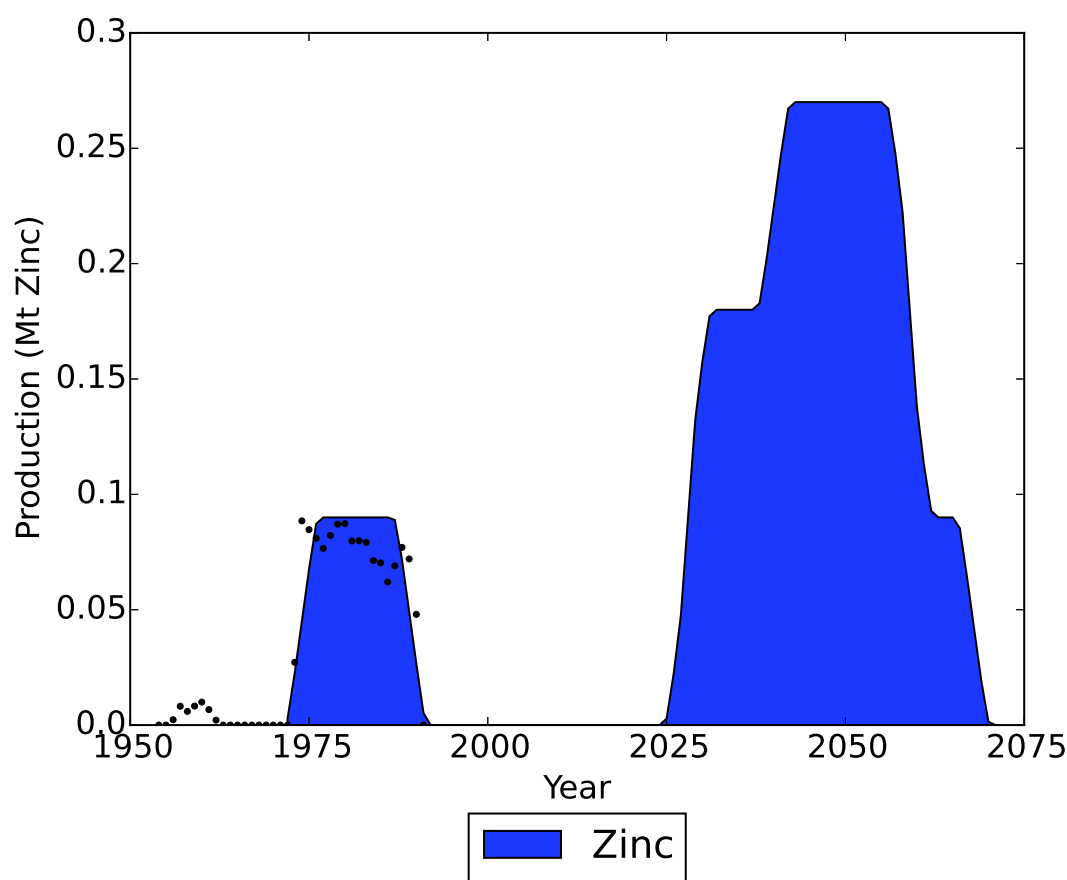

Figure 4.19: Greenland projections capped at 16

Table 4.19: Peak years - All

| Name  | URR  | Peak Year | Peak Rate |
|-------|------|-----------|-----------|
| Zinc  | 9.45 | 2048      | 0.27      |
| Total | 9.45 | 2048      | 0.27      |

4.10.2 By Mineral

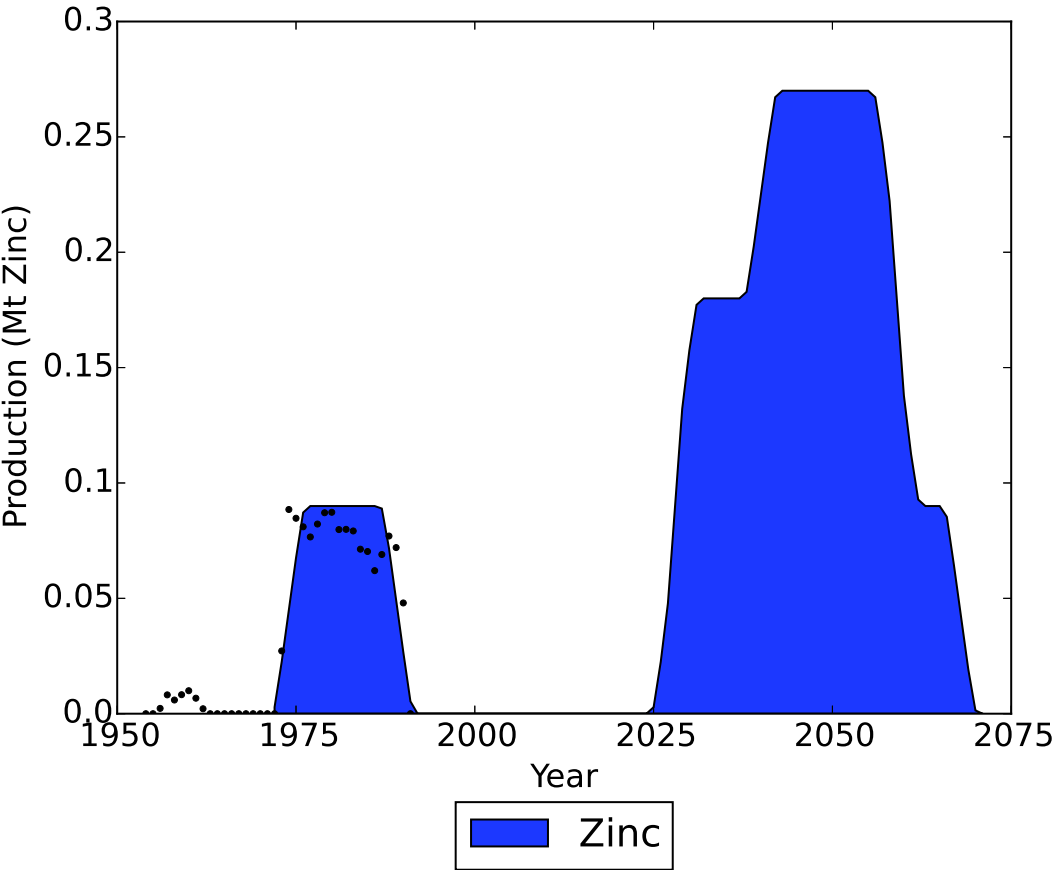

Figure 4.20: Greenland projection by mineral type

| Table 4.20: Peak years - Minerals |      |           |           |
|-----------------------------------|------|-----------|-----------|
| Name                              | URR  | Peak Year | Peak Rate |
| Zinc                              | 9.45 | 2048      | 0.27      |
| Total                             | 9.45 | 2048      | 0.27      |

4.11 Hungary

4.11.1 All Projections

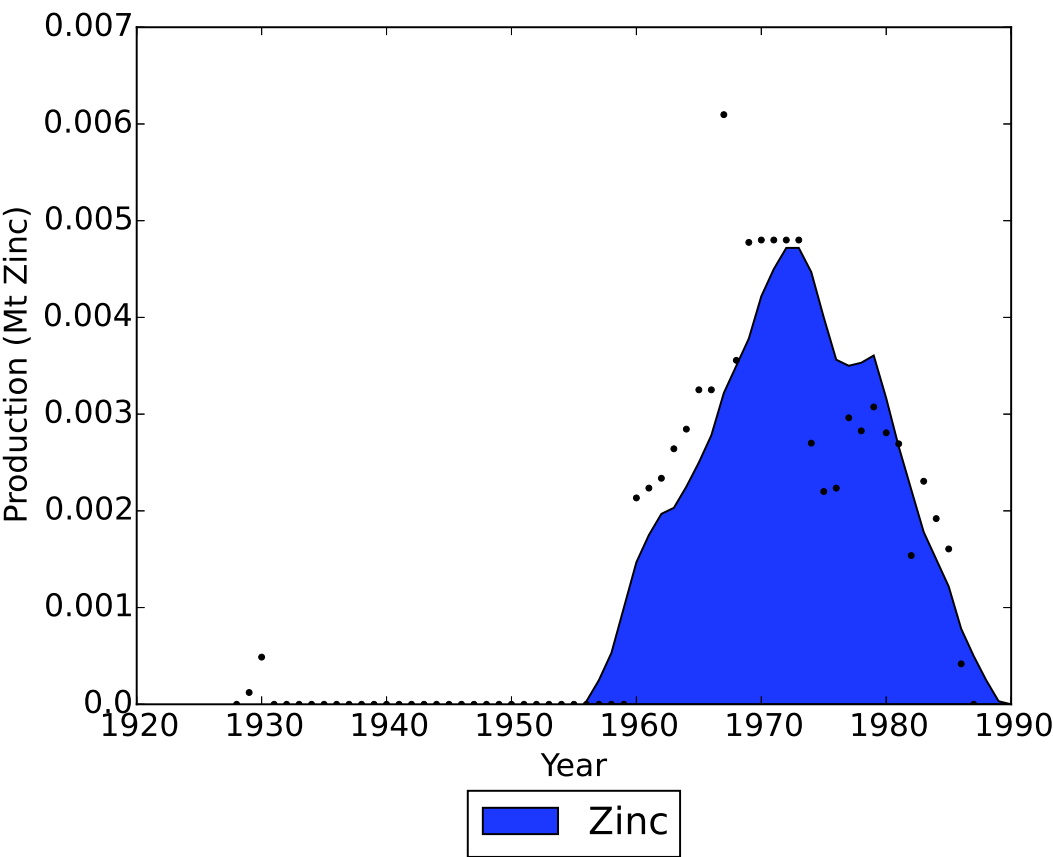

Figure 4.21: Hungary projections capped at 16

| Table 4.21: Peak years - All |      |           |           |
|------------------------------|------|-----------|-----------|
| Name                         | URR  | Peak Year | Peak Rate |
| Zinc                         | 0.08 | 1972      | —         |
| Total                        | 0.08 | 1972      | —         |

4.11.2 By Mineral

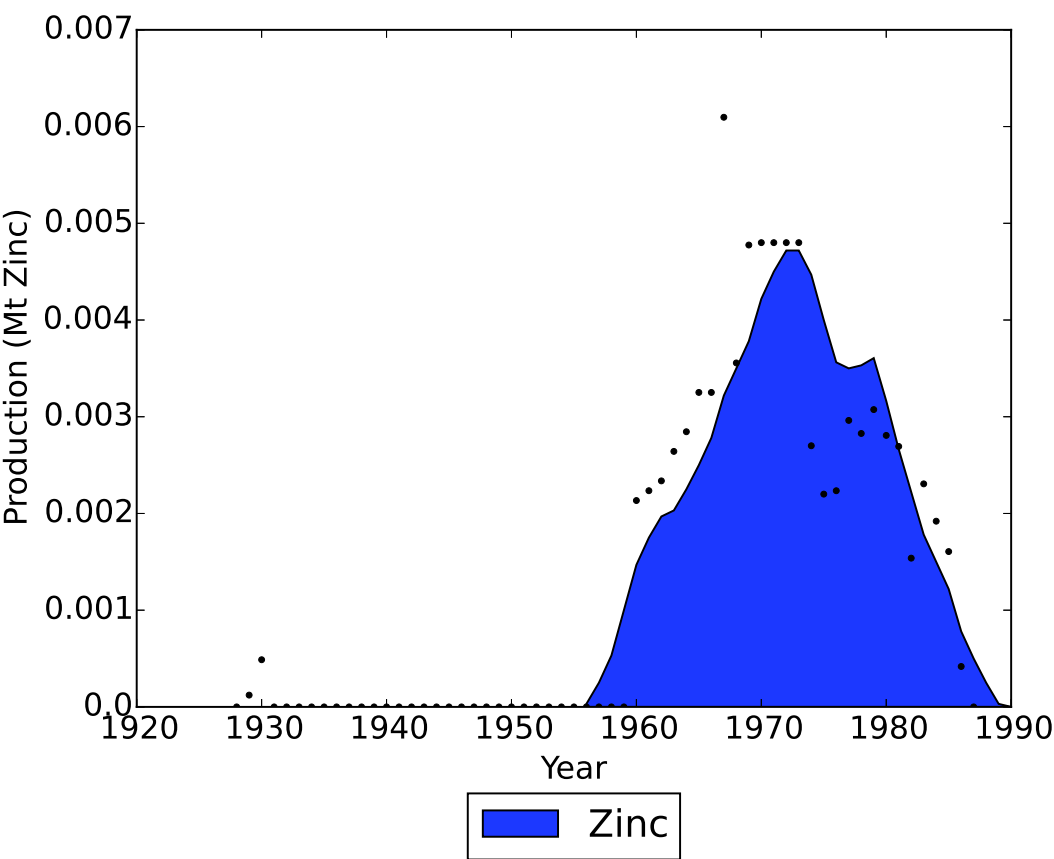

Figure 4.22: Hungary projection by mineral type

| Table 4.22: Peak years - Minerals |      |           |           |
|-----------------------------------|------|-----------|-----------|
| Name                              | URR  | Peak Year | Peak Rate |
| Zinc                              | 0.08 | 1972      | —         |
| Total                             | 0.08 | 1972      | —         |

4.12 Ireland

4.12.1 All Projections

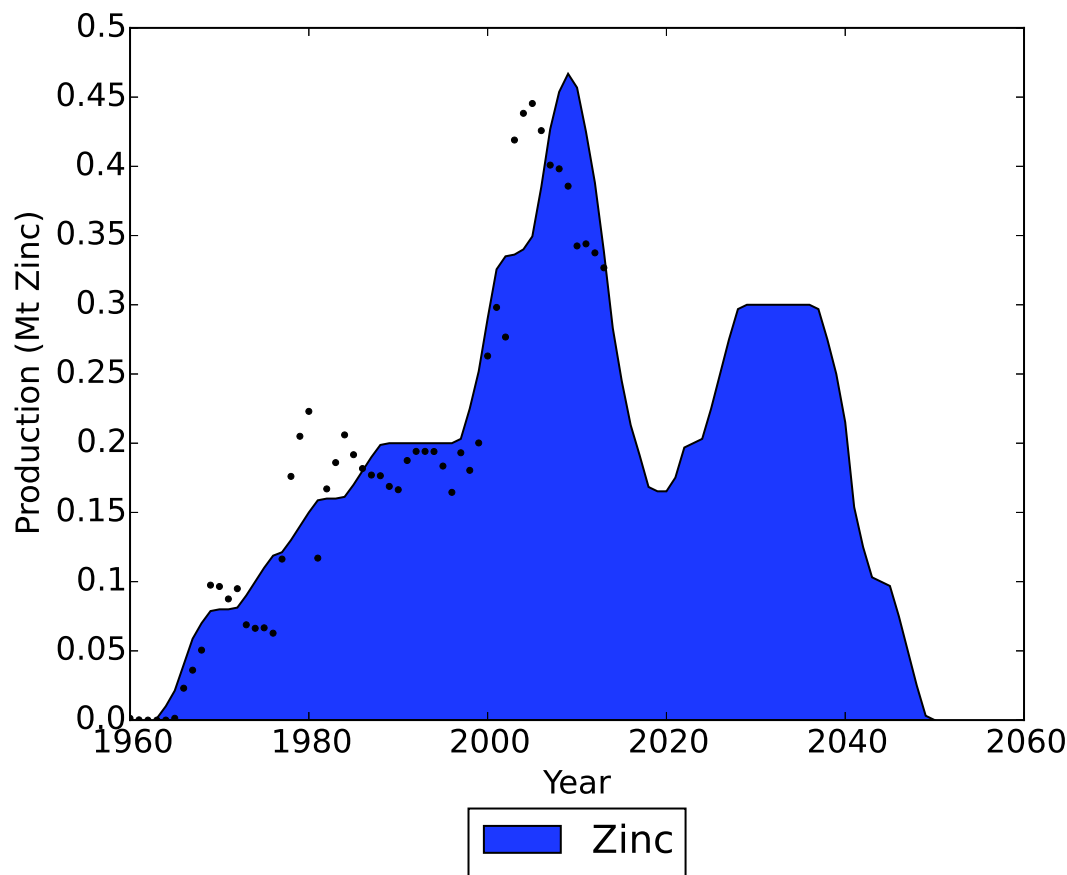

Figure 4.23: Ireland projections capped at 16

Table 4.23: Peak years - All

| Name  | URR   | Peak Year | Peak Rate |
|-------|-------|-----------|-----------|
| Zinc  | 17.88 | 2009      | 0.47      |
| Total | 17.88 | 2009      | 0.47      |

4.12.2 By Mineral

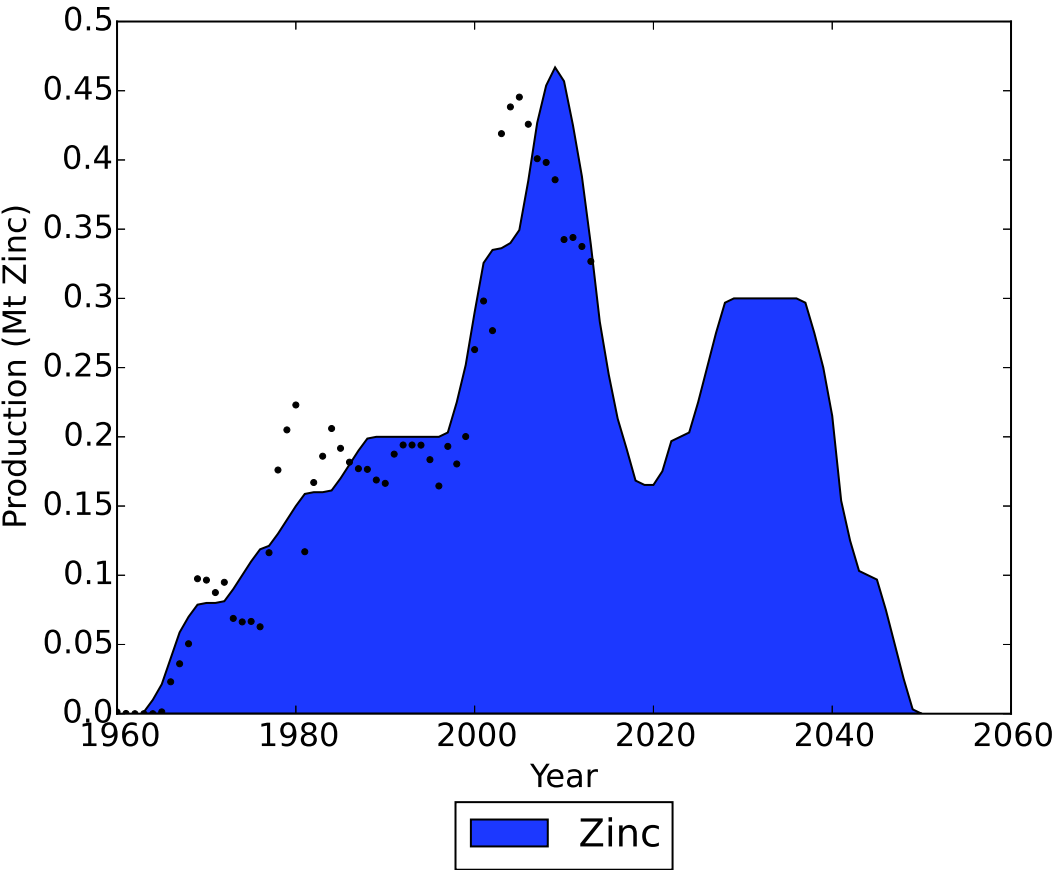

Figure 4.24: Ireland projection by mineral type

Table 4.24: Peak years - Minerals

| Name  | URR   | Peak Year | Peak Rate |
|-------|-------|-----------|-----------|
| Zinc  | 17.88 | 2009      | 0.47      |
| Total | 17.88 | 2009      | 0.47      |



4.13 Italy

4.13.1 All Projections

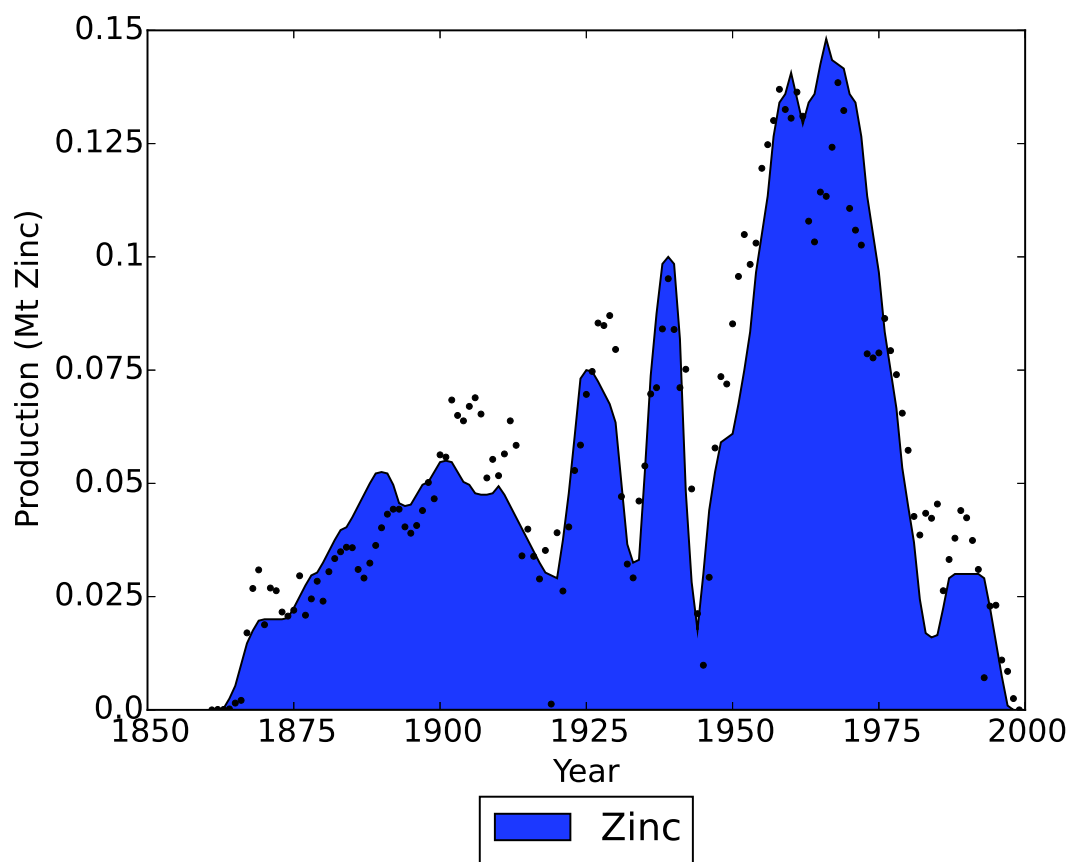

Table 4.25: Peak years - All

| Name  | URR  | Peak Year | Peak Rate |
|-------|------|-----------|-----------|
| Zinc  | 7.68 | 1966      | 0.15      |
| Total | 7.68 | 1966      | 0.15      |

4.13.2 By Mineral

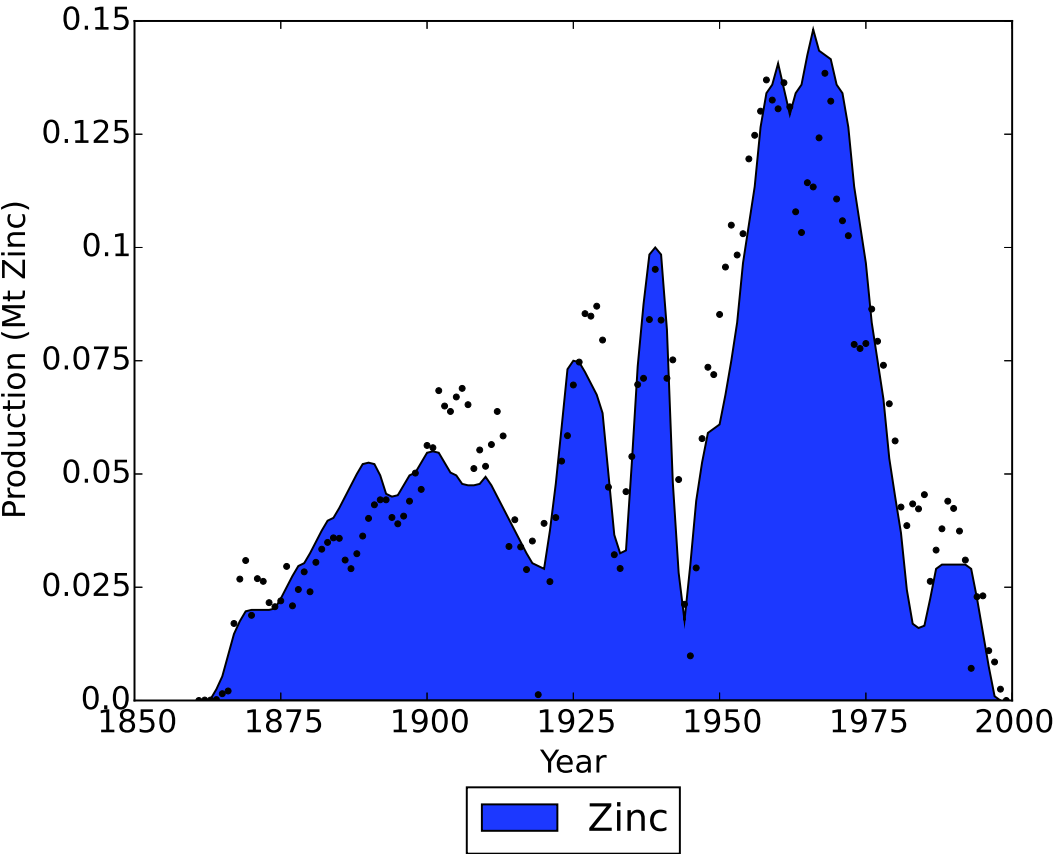

Figure 4.26: Italy projection by mineral type

| Table 4.26: Peak years - Minerals |      |           |           |
|-----------------------------------|------|-----------|-----------|
| Name                              | URR  | Peak Year | Peak Rate |
| Zinc                              | 7.68 | 1966      | 0.15      |
| Total                             | 7.68 | 1966      | 0.15      |

4.14 Kosovo

4.14.1 All Projections

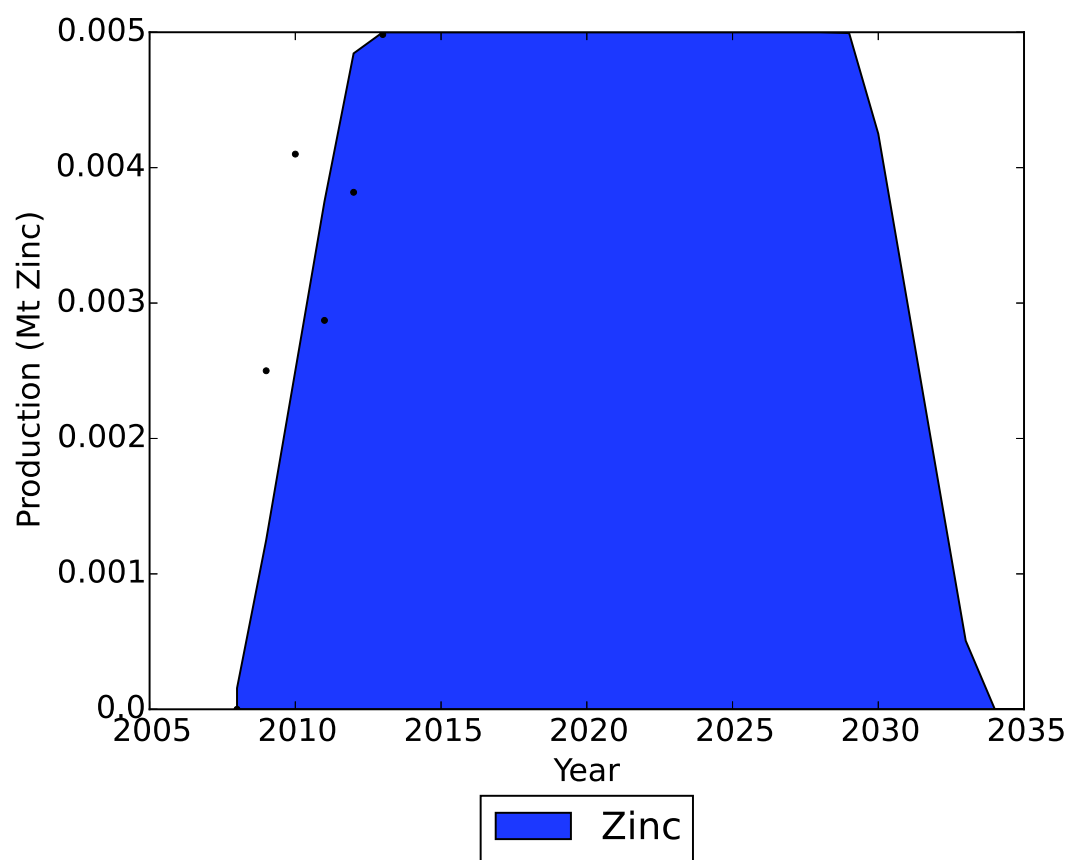

Figure 4.27: Kosovo projections capped at 16

| Table 4.27: Peak years - All |      |           |           |
|------------------------------|------|-----------|-----------|
| Name                         | URR  | Peak Year | Peak Rate |
| Zinc                         | 0.11 | 2013      | 0.01      |
| Total                        | 0.11 | 2013      | 0.01      |

4.14.2 By Mineral

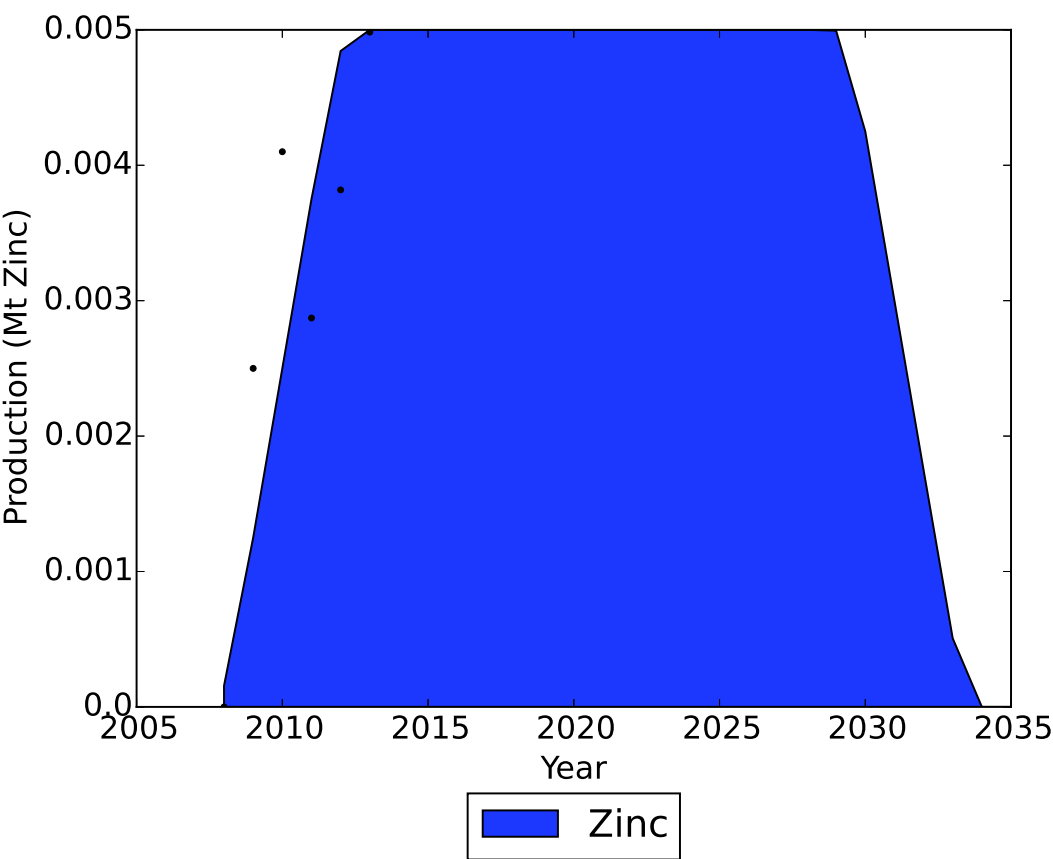

Figure 4.28: Kosovo projection by mineral type

| Table 4.28: Peak years - Minerals |      |           |           |
|-----------------------------------|------|-----------|-----------|
| Name                              | URR  | Peak Year | Peak Rate |
| Zinc                              | 0.11 | 2013      | 0.01      |
| Total                             | 0.11 | 2013      | 0.01      |

4.15 Macedonia

4.15.1 All Projections

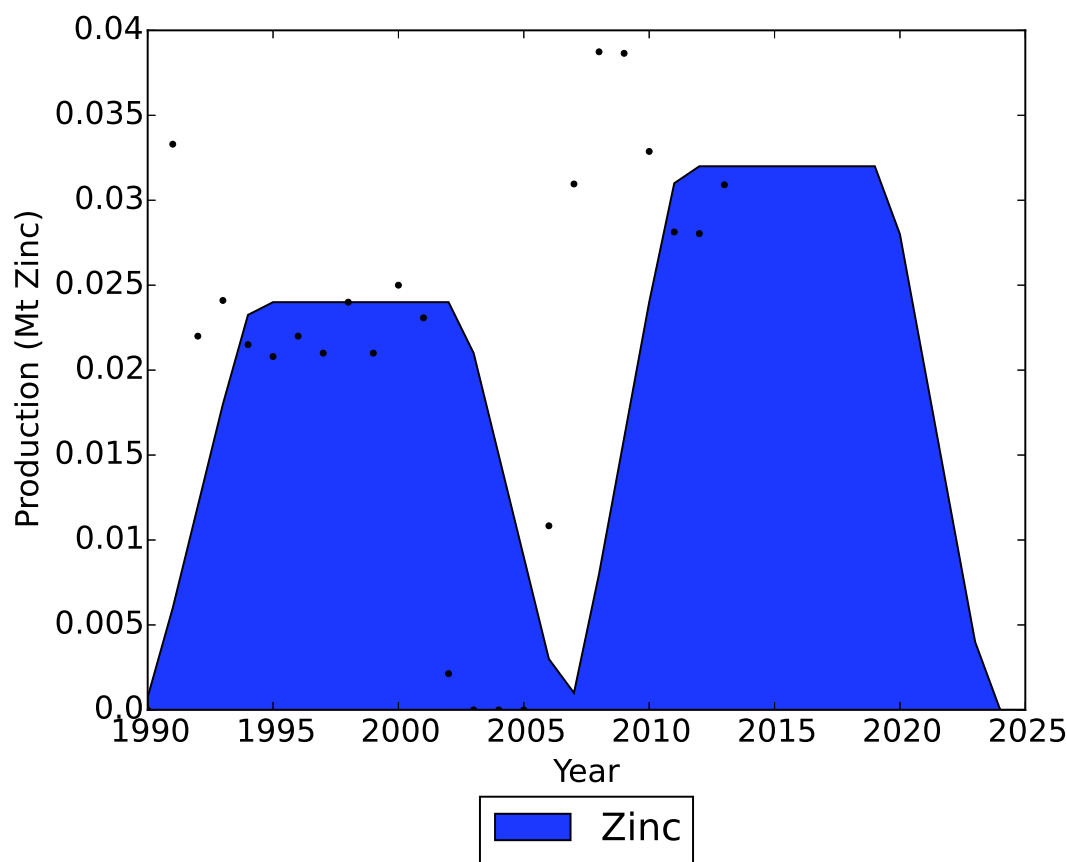

Figure 4.29: Macedonia projections capped at 16

| Table 4.29: Peak years - All |     |           |           |
|------------------------------|-----|-----------|-----------|
| Name                         | URR | Peak Year | Peak Rate |
| Zinc                         | 0.7 | 2012      | 0.03      |
| Total                        | 0.7 | 2012      | 0.03      |

4.15.2 By Mineral

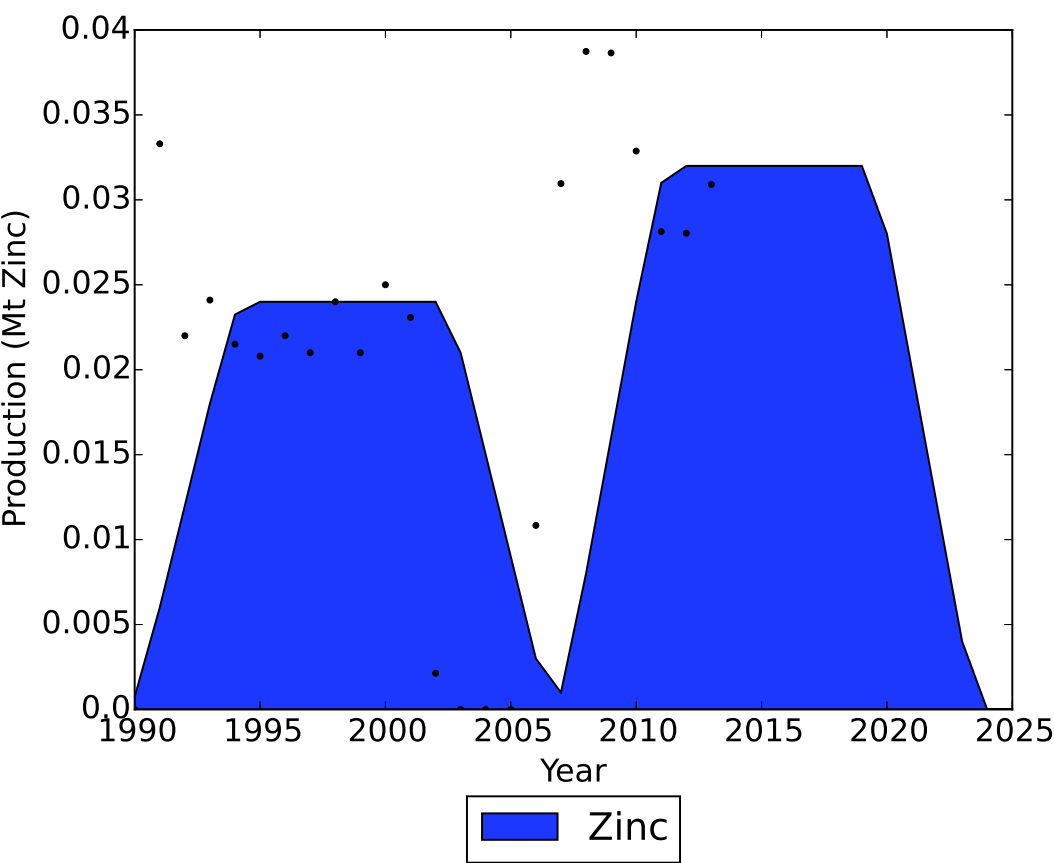

Figure 4.30: Macedonia projection by mineral type

| Table 4.30: Peak years - Minerals |     |           |           |
|-----------------------------------|-----|-----------|-----------|
| Name                              | URR | Peak Year | Peak Rate |
| Zinc                              | 0.7 | 2012      | 0.03      |
| Total                             | 0.7 | 2012      | 0.03      |

# 4.16 Montenegro

## 4.16.1 All Projections

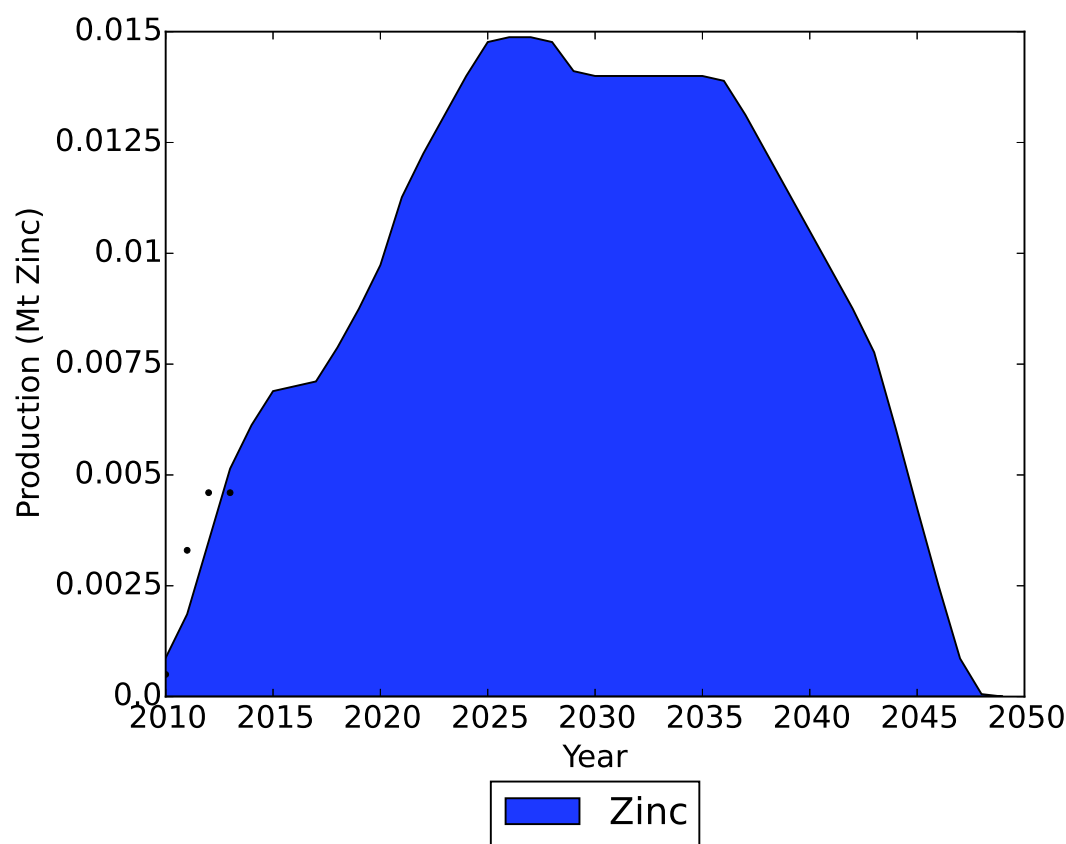

Figure 4.31: Montenegro projections capped at 16

| Table 4.31: Peak years - All |      |           |           |
|------------------------------|------|-----------|-----------|
| Name                         | URR  | Peak Year | Peak Rate |
| Zinc                         | 0.37 | 2026      | 0.01      |
| Total                        | 0.37 | 2026      | 0.01      |

4.16.2 By Mineral

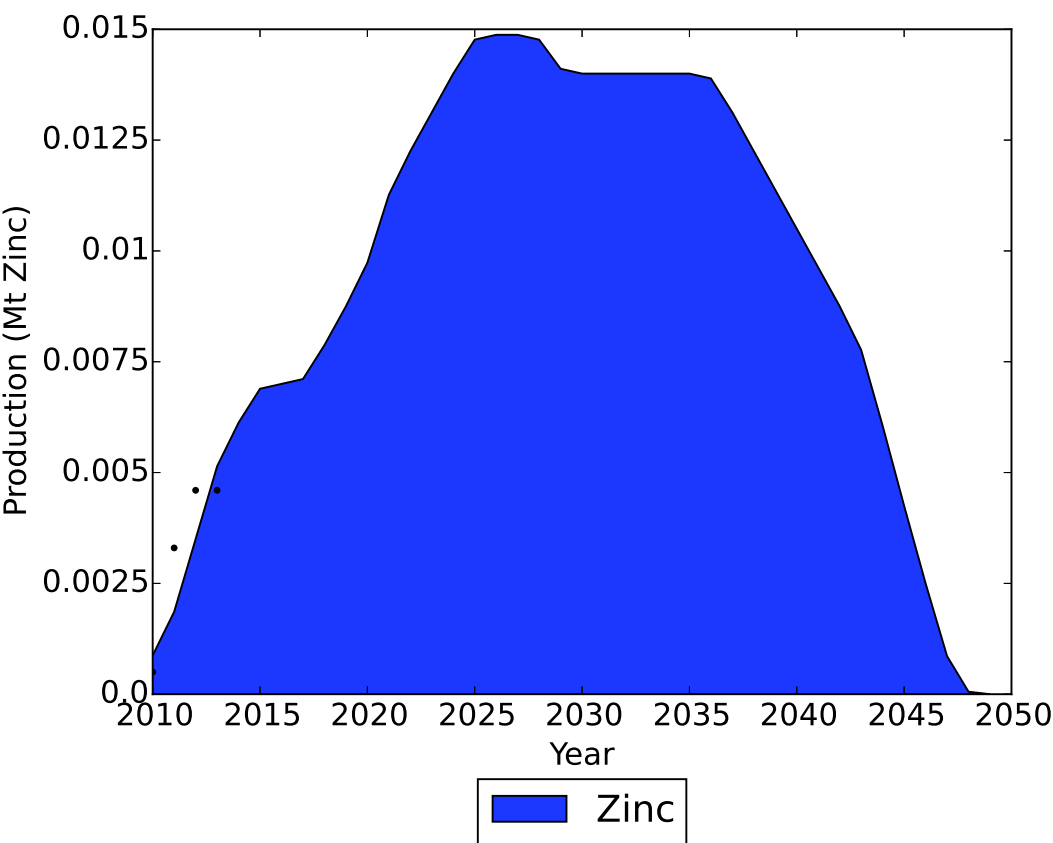

Figure 4.32: Montenegro projection by mineral type

| Table 4.32: Peak years - Minerals |      |           |           |
|-----------------------------------|------|-----------|-----------|
| Name                              | URR  | Peak Year | Peak Rate |
| Zinc                              | 0.37 | 2026      | 0.01      |
| Total                             | 0.37 | 2026      | 0.01      |



4.17 Norway

4.17.1 All Projections

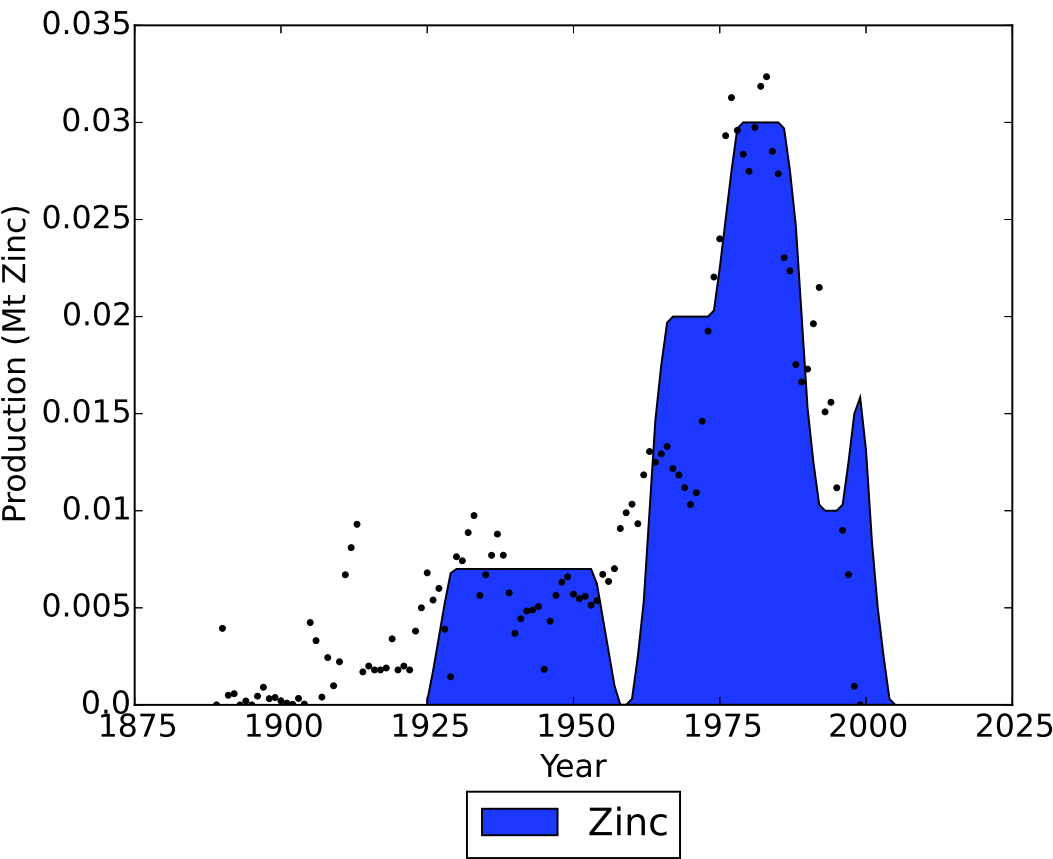

Figure 4.33: Norway projections capped at 16

| Table 4.33: Peak years - All |     |           |           |
|------------------------------|-----|-----------|-----------|
| Name                         | URR | Peak Year | Peak Rate |
| Zinc                         | 1.0 | 1979      | 0.03      |
| Total                        | 1.0 | 1979      | 0.03      |

4.17.2 By Mineral

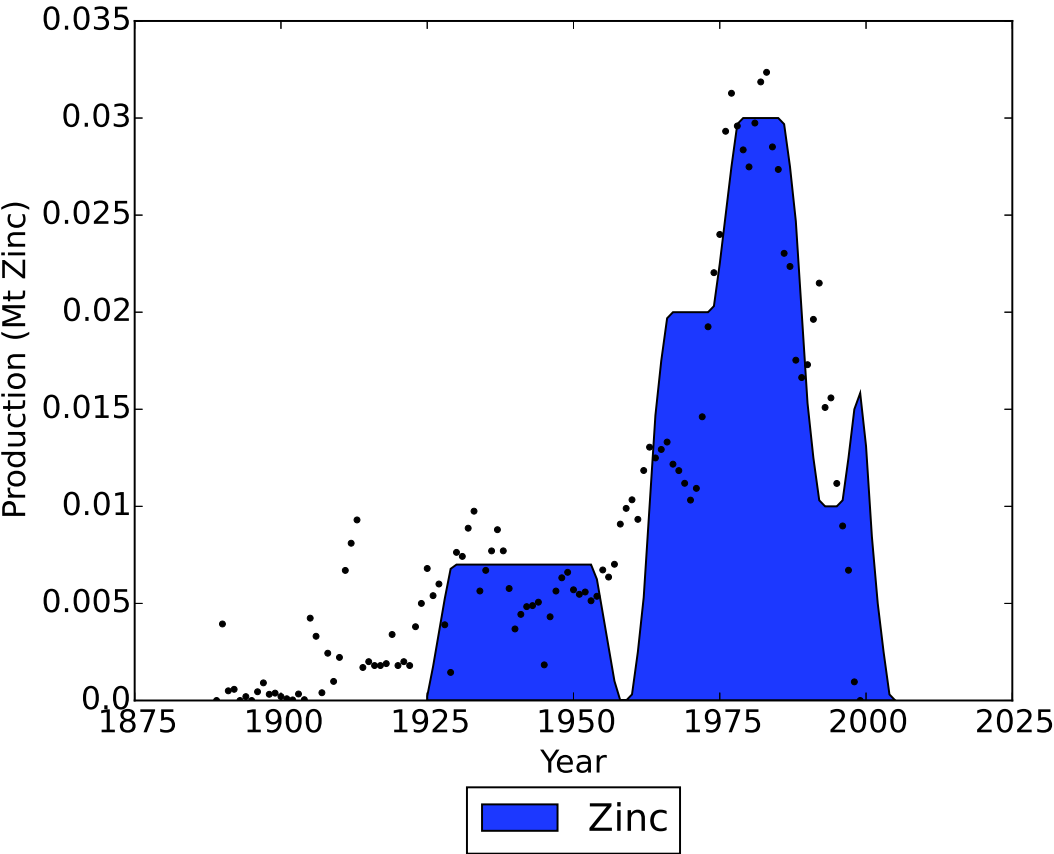

Figure 4.34: Norway projection by mineral type

| Table 4.34: Peak years - Minerals |            |             |             |
|-----------------------------------|------------|-------------|-------------|
| Name                              | URR        | Peak Year   | Peak Rate   |
| Zinc                              | 1.0        | 1979        | 0.03        |
| <b>Total</b>                      | <b>1.0</b> | <b>1979</b> | <b>0.03</b> |

4.18 Poland

4.18.1 All Projections

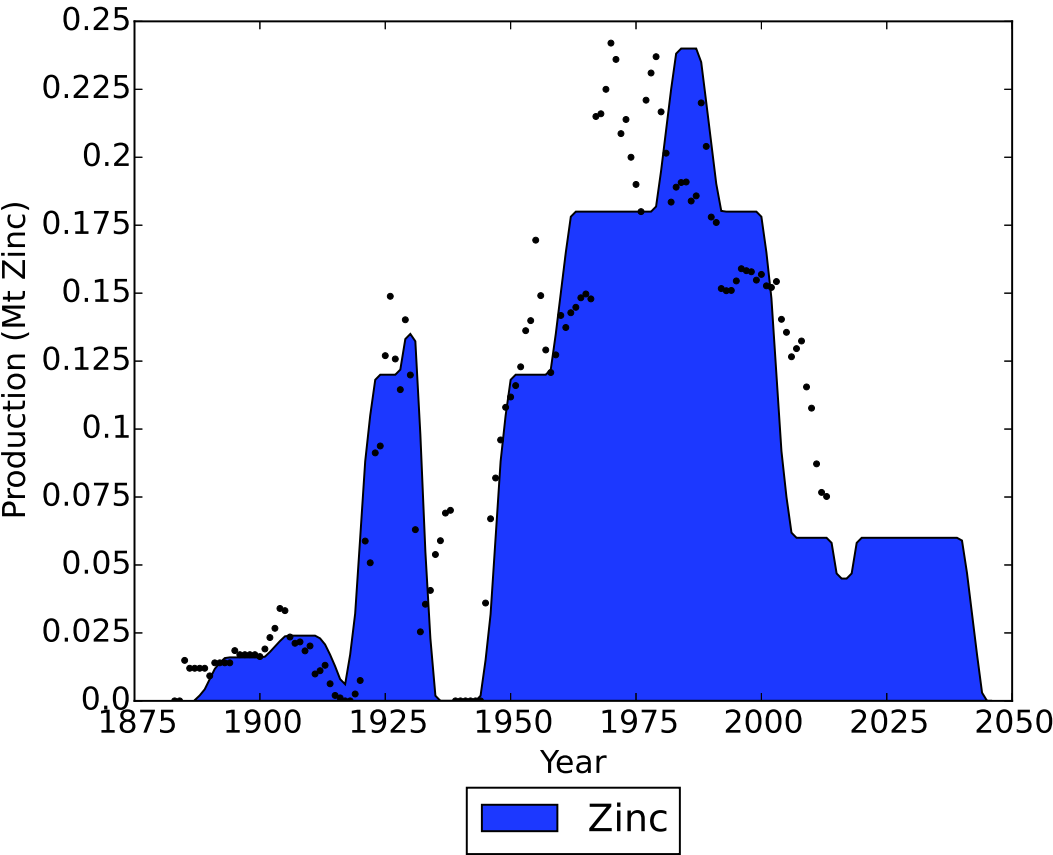

Figure 4.35: Poland projections capped at 16

| Table 4.35: Peak years - All |       |           |           |
|------------------------------|-------|-----------|-----------|
| Name                         | URR   | Peak Year | Peak Rate |
| Zinc                         | 14.21 | 1984      | 0.24      |
| Total                        | 14.21 | 1984      | 0.24      |

4.18.2 By Mineral

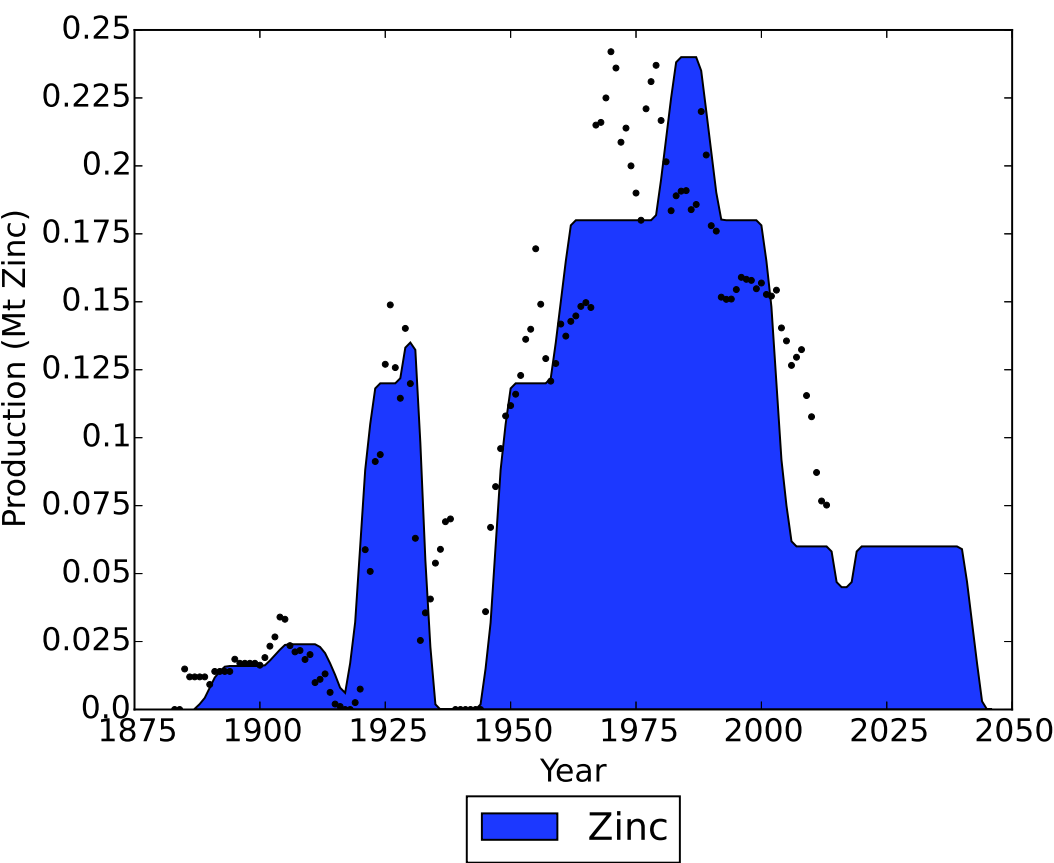

Figure 4.36: Poland projection by mineral type

| Table 4.36: Peak years - Minerals |       |           |           |
|-----------------------------------|-------|-----------|-----------|
| Name                              | URR   | Peak Year | Peak Rate |
| Zinc                              | 14.21 | 1984      | 0.24      |
| Total                             | 14.21 | 1984      | 0.24      |

4.19 Portugal

4.19.1 All Projections

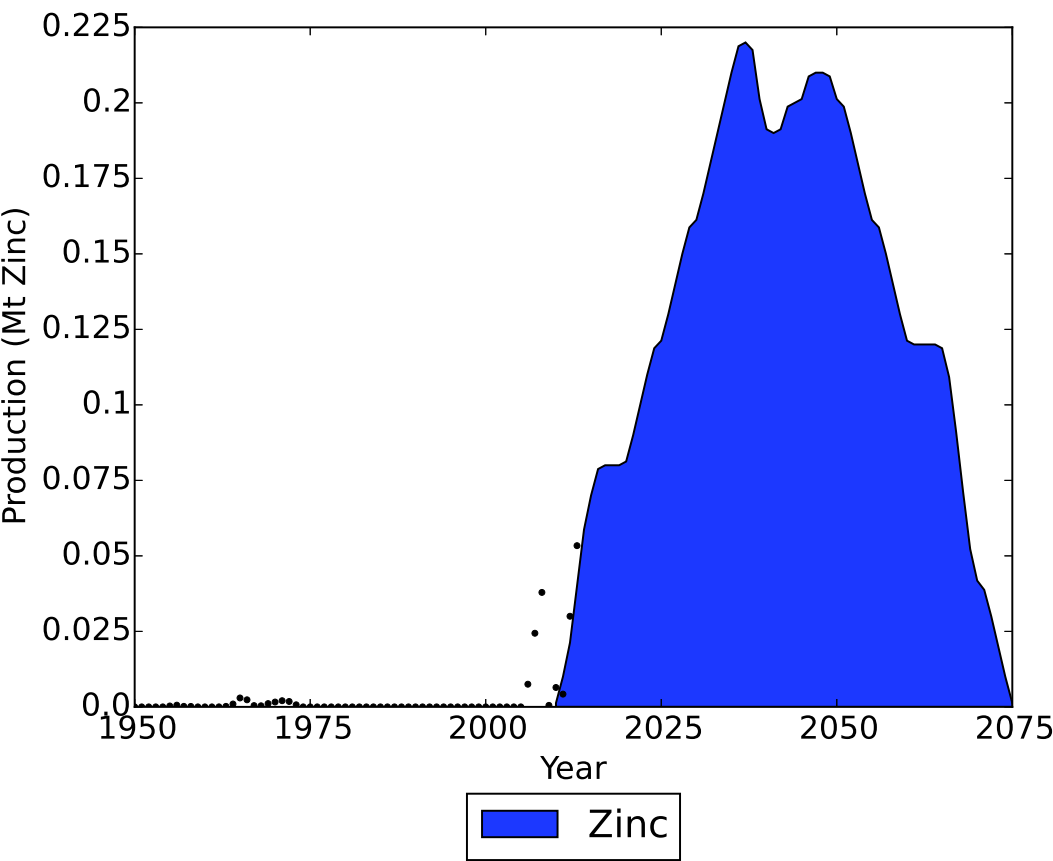

Figure 4.37: Portugal projections capped at 16

| Table 4.37: Peak years - All |      |           |           |
|------------------------------|------|-----------|-----------|
| Name                         | URR  | Peak Year | Peak Rate |
| Zinc                         | 8.56 | 2037      | 0.22      |
| Total                        | 8.56 | 2037      | 0.22      |

4.19.2 By Mineral

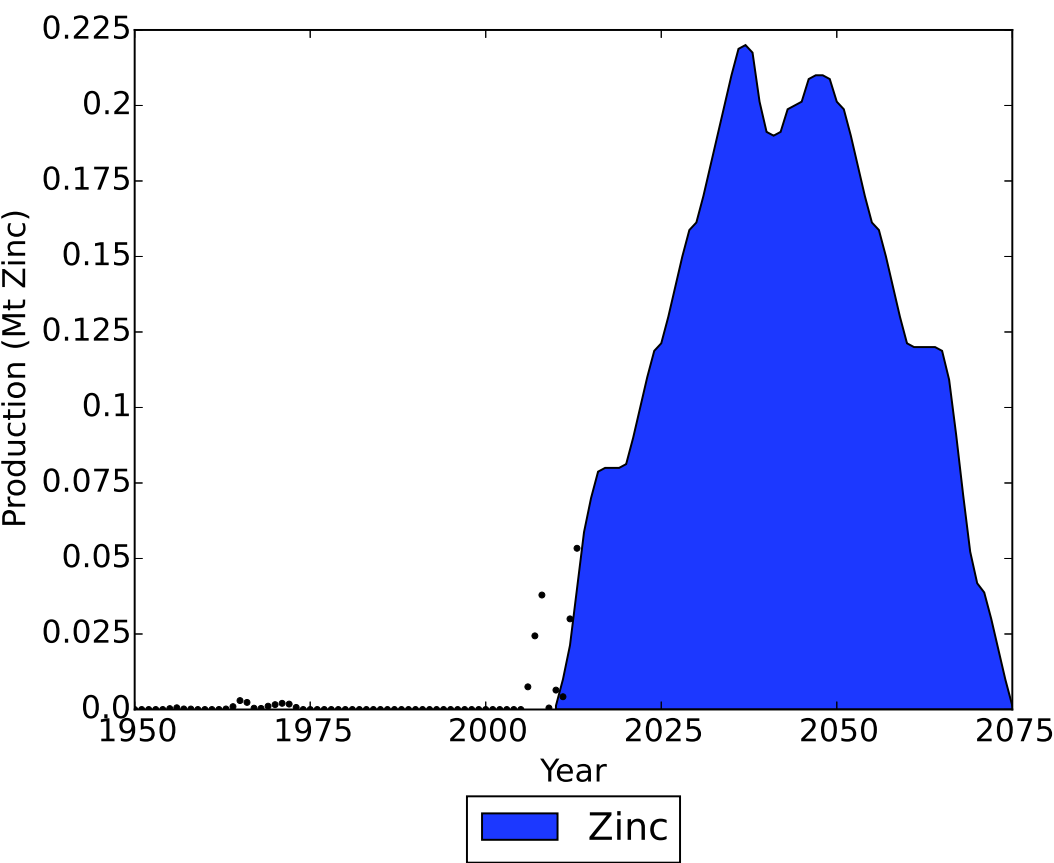

Figure 4.38: Portugal projection by mineral type

| Table 4.38: Peak years - Minerals |      |           |           |
|-----------------------------------|------|-----------|-----------|
| Name                              | URR  | Peak Year | Peak Rate |
| Zinc                              | 8.56 | 2037      | 0.22      |
| Total                             | 8.56 | 2037      | 0.22      |

4.20 Romania

4.20.1 All Projections

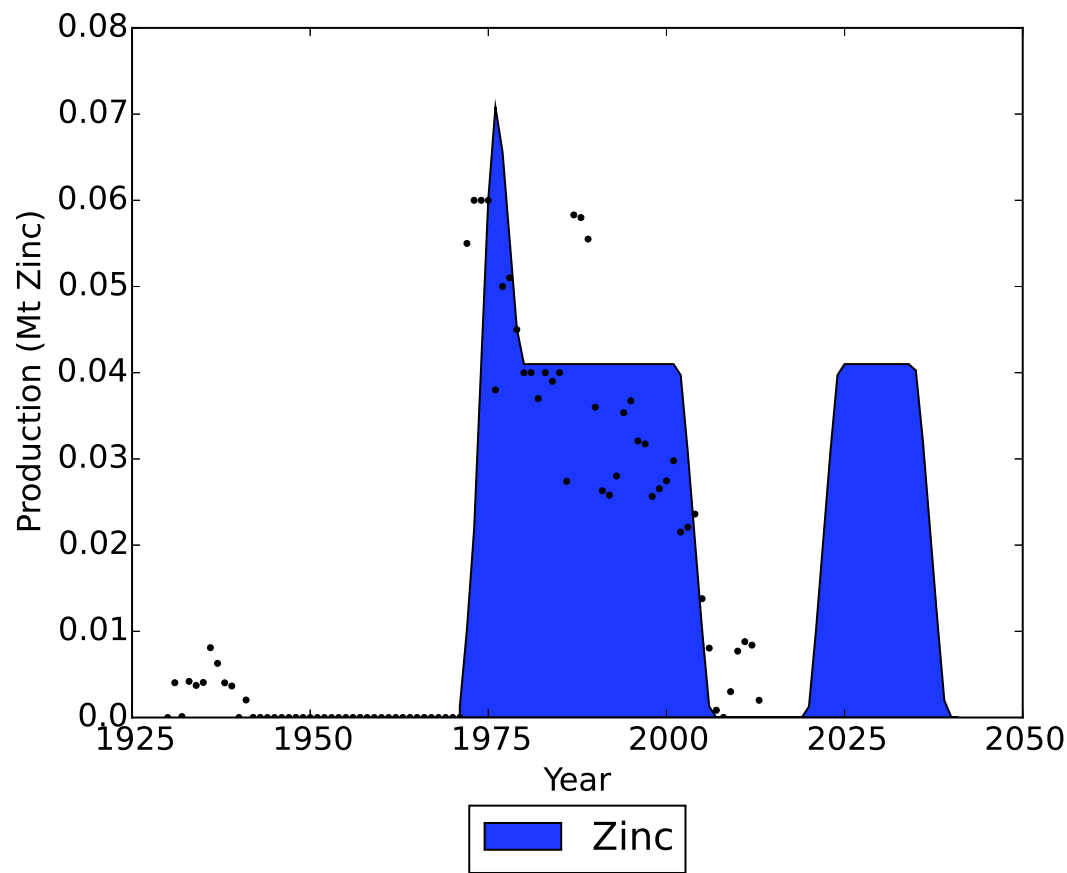

Figure 4.39: Romania projections capped at 16

| Table 4.39: Peak years - All |     |           |           |
|------------------------------|-----|-----------|-----------|
| Name                         | URR | Peak Year | Peak Rate |
| Zinc                         | 2.0 | 1976      | 0.07      |
| Total                        | 2.0 | 1976      | 0.07      |

4.20.2 By Mineral

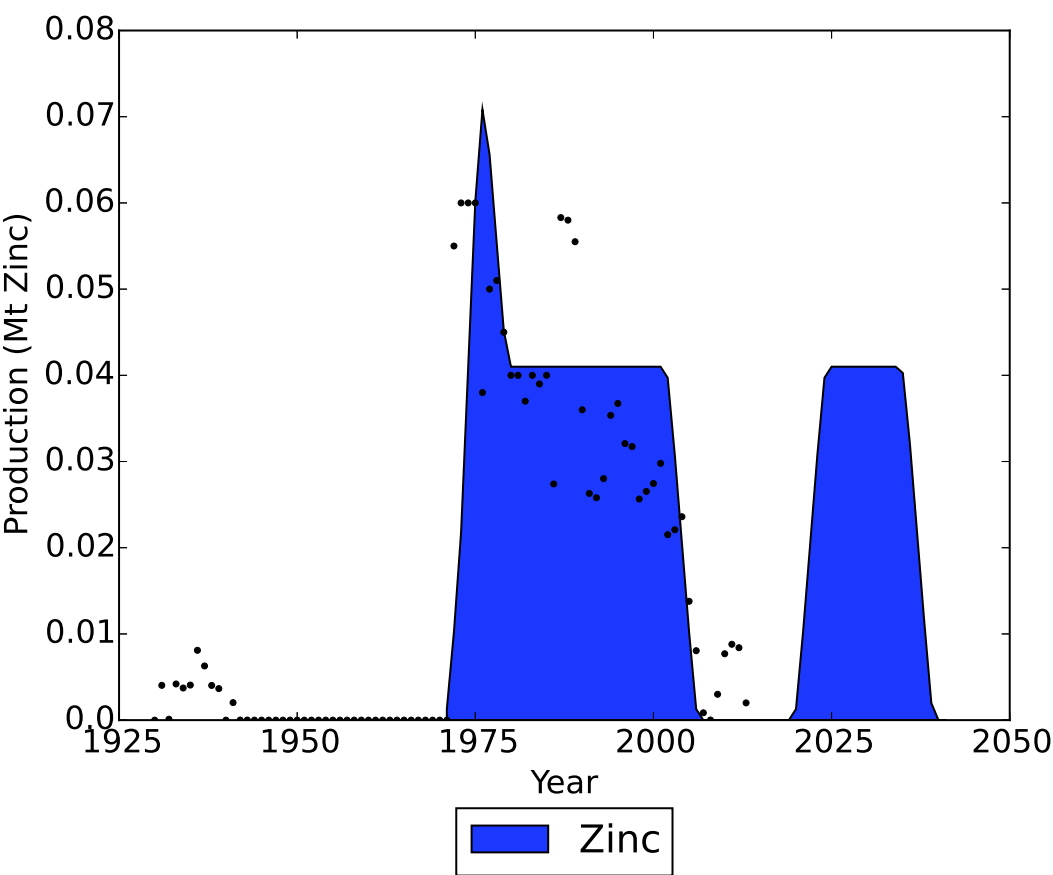

Figure 4.40: Romania projection by mineral type

Table 4.40: Peak years - Minerals

| Name  | URR | Peak Year | Peak Rate |
|-------|-----|-----------|-----------|
| Zinc  | 2.0 | 1976      | 0.07      |
| Total | 2.0 | 1976      | 0.07      |



4.21 Serbia

4.21.1 All Projections

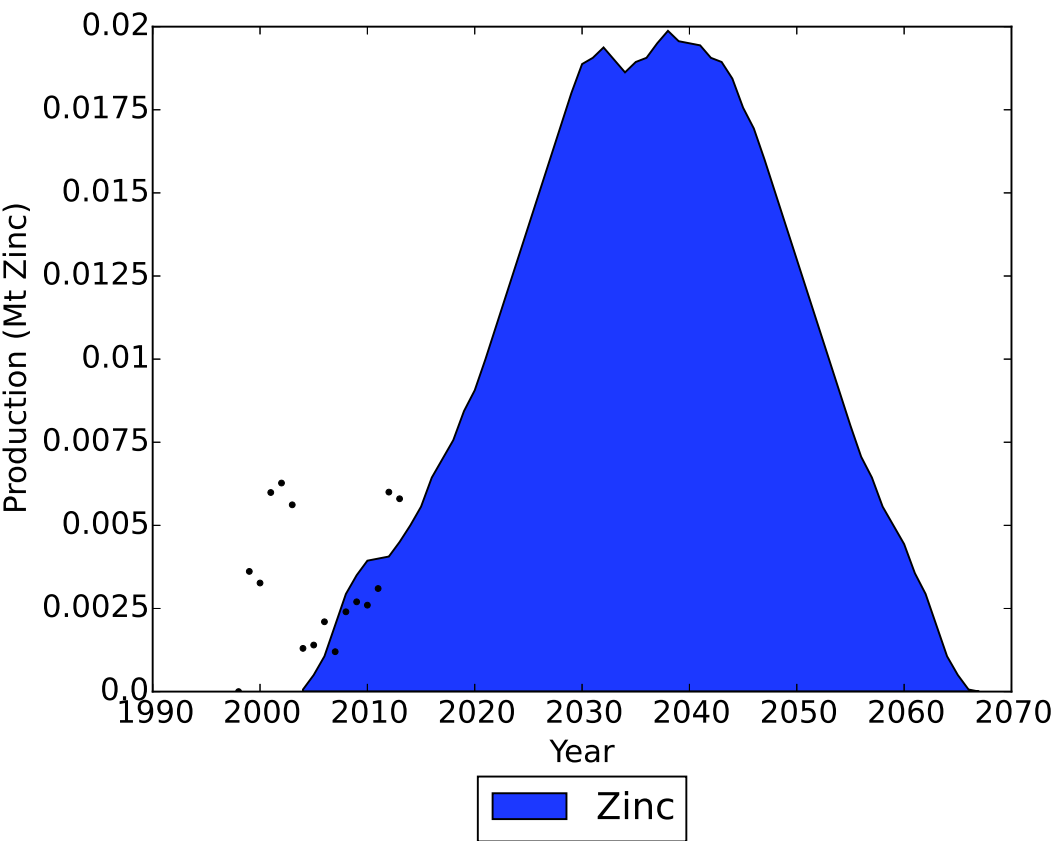

Figure 4.41: Serbia projections capped at 16

| Table 4.41: Peak years - All |      |           |           |
|------------------------------|------|-----------|-----------|
| Name                         | URR  | Peak Year | Peak Rate |
| Zinc                         | 0.67 | 2038      | 0.02      |
| Total                        | 0.67 | 2038      | 0.02      |

4.21.2 By Mineral

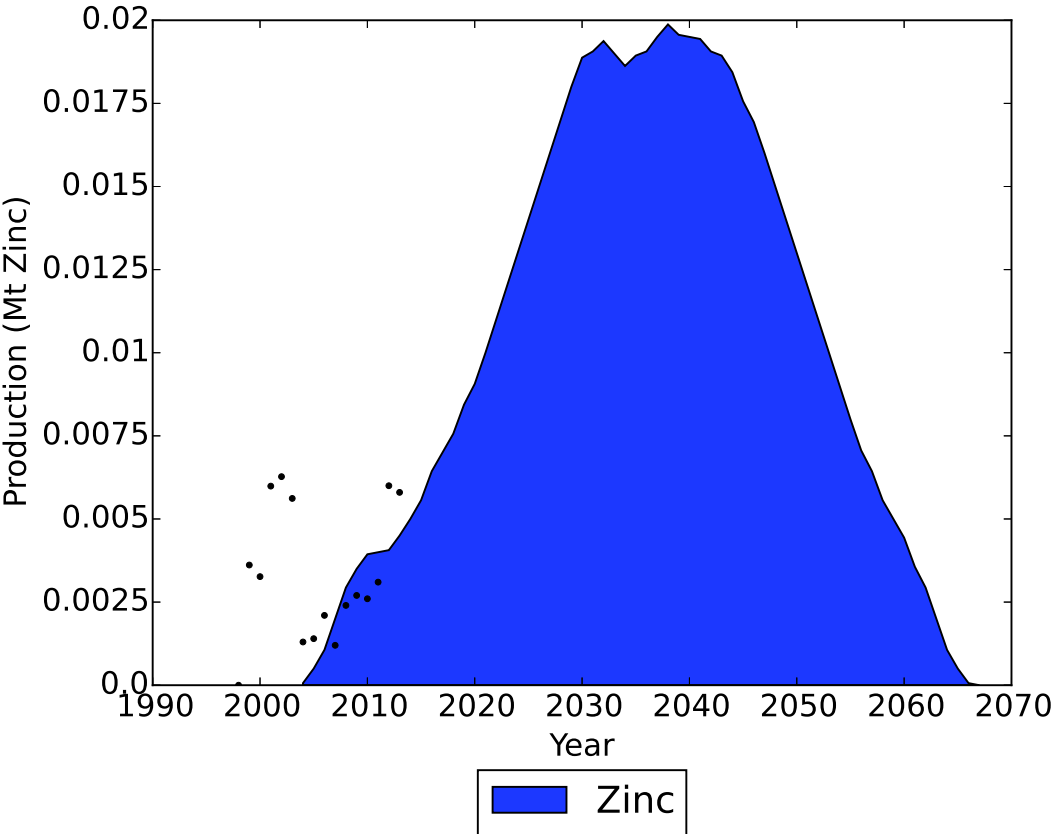

Figure 4.42: Serbia projection by mineral type

Table 4.42: Peak years - Minerals

| Name  | URR  | Peak Year | Peak Rate |
|-------|------|-----------|-----------|
| Zinc  | 0.67 | 2038      | 0.02      |
| Total | 0.67 | 2038      | 0.02      |

4.22 Slovakia

4.22.1 All Projections

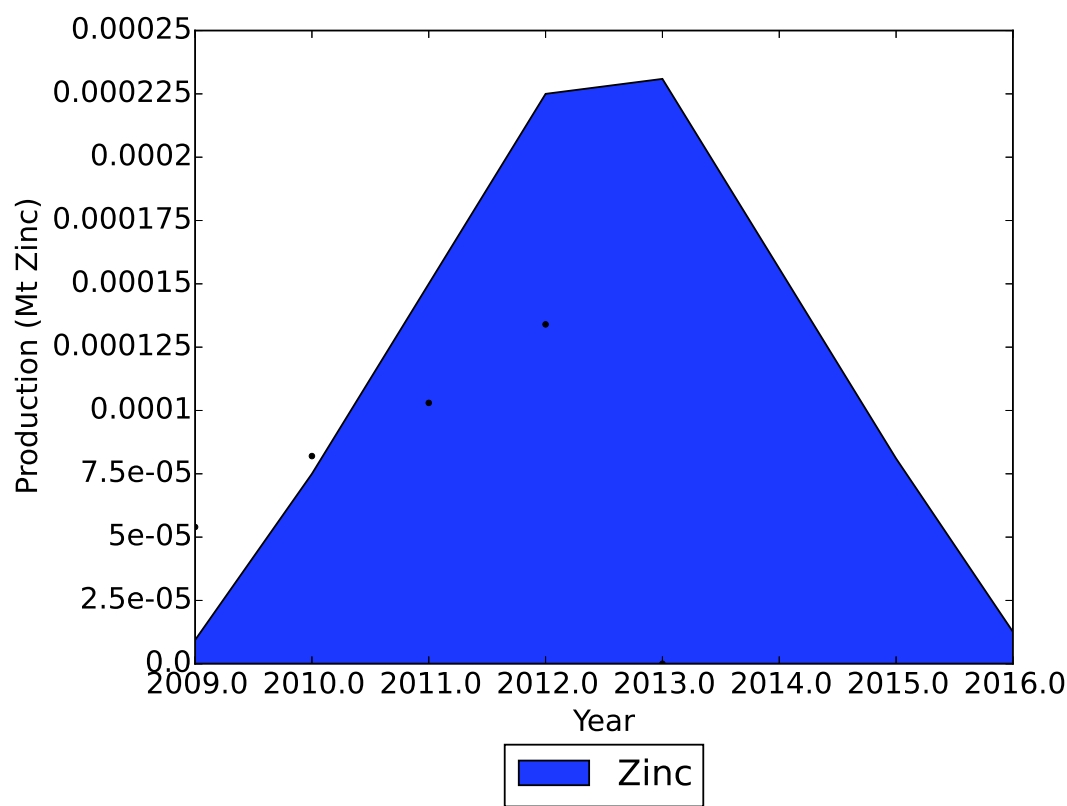

Figure 4.43: Slovakia projections capped at 16

| Table 4.43: Peak years - All |     |           |           |
|------------------------------|-----|-----------|-----------|
| Name                         | URR | Peak Year | Peak Rate |
| Zinc                         | –   | 2013      | –         |
| Total                        | –   | 2013      | –         |

4.22.2 By Mineral

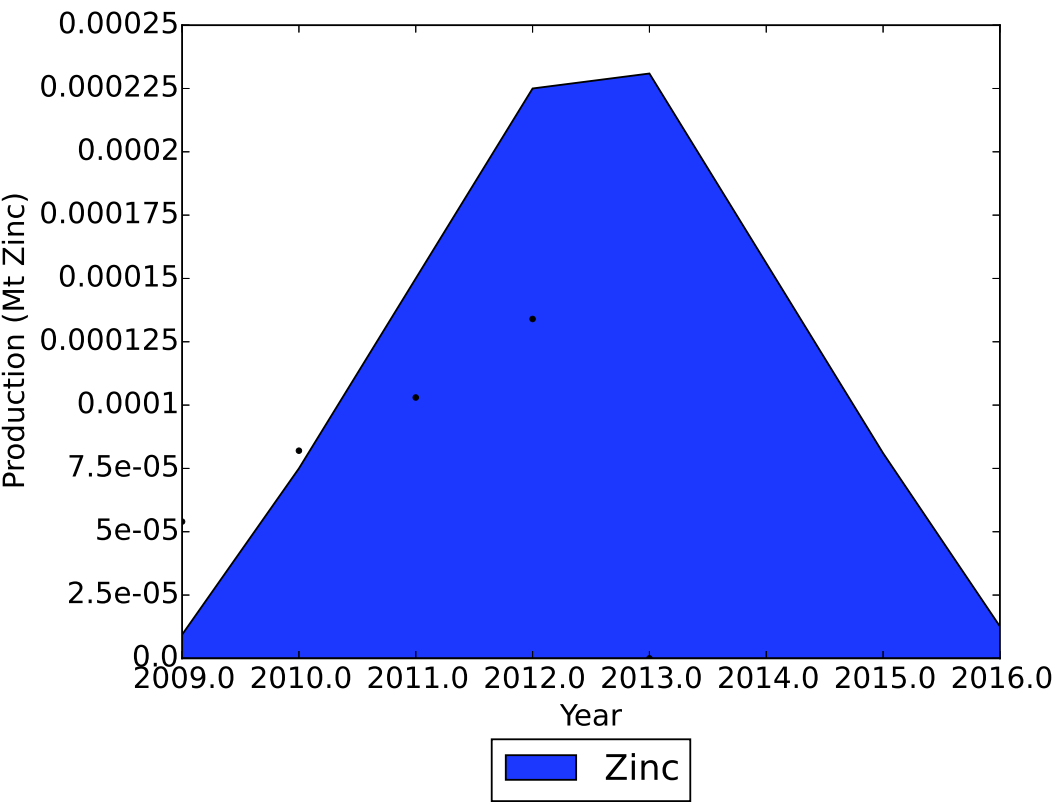

Figure 4.44: Slovakia projection by mineral type

| Table 4.44: Peak years - Minerals |     |           |           |
|-----------------------------------|-----|-----------|-----------|
| Name                              | URR | Peak Year | Peak Rate |
| Zinc                              | –   | 2013      | –         |
| Total                             | –   | 2013      | –         |

4.23 Slovenia

4.23.1 All Projections

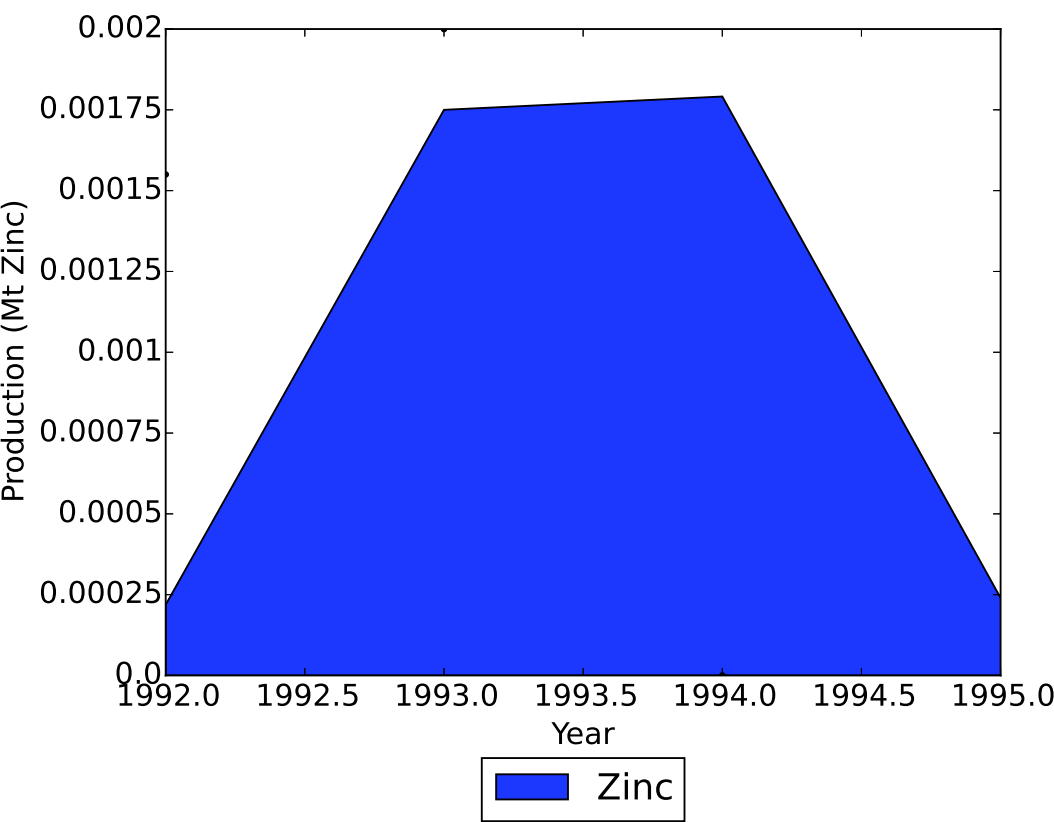

Figure 4.45: Slovenia projections capped at 16

| Table 4.45: Peak years - All |     |           |           |
|------------------------------|-----|-----------|-----------|
| Name                         | URR | Peak Year | Peak Rate |
| Zinc                         | –   | 1994      | –         |
| Total                        | –   | 1994      | –         |

#### 4.23.2 By Mineral

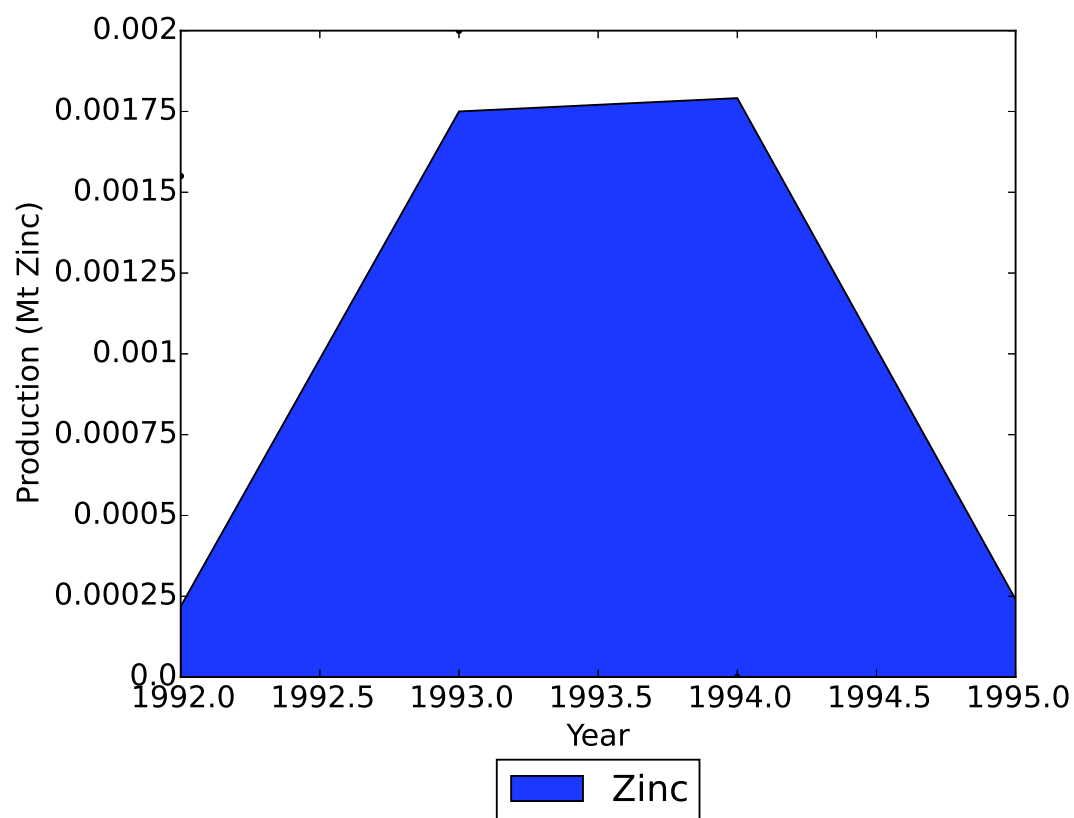

Figure 4.46: Slovenia projection by mineral type

| Table 4.46: Peak years - Minerals |     |             |           |
|-----------------------------------|-----|-------------|-----------|
| Name                              | URR | Peak Year   | Peak Rate |
| Zinc                              | –   | 1994        | –         |
| <b>Total</b>                      | –   | <b>1994</b> | –         |

4.24 Spain

4.24.1 All Projections

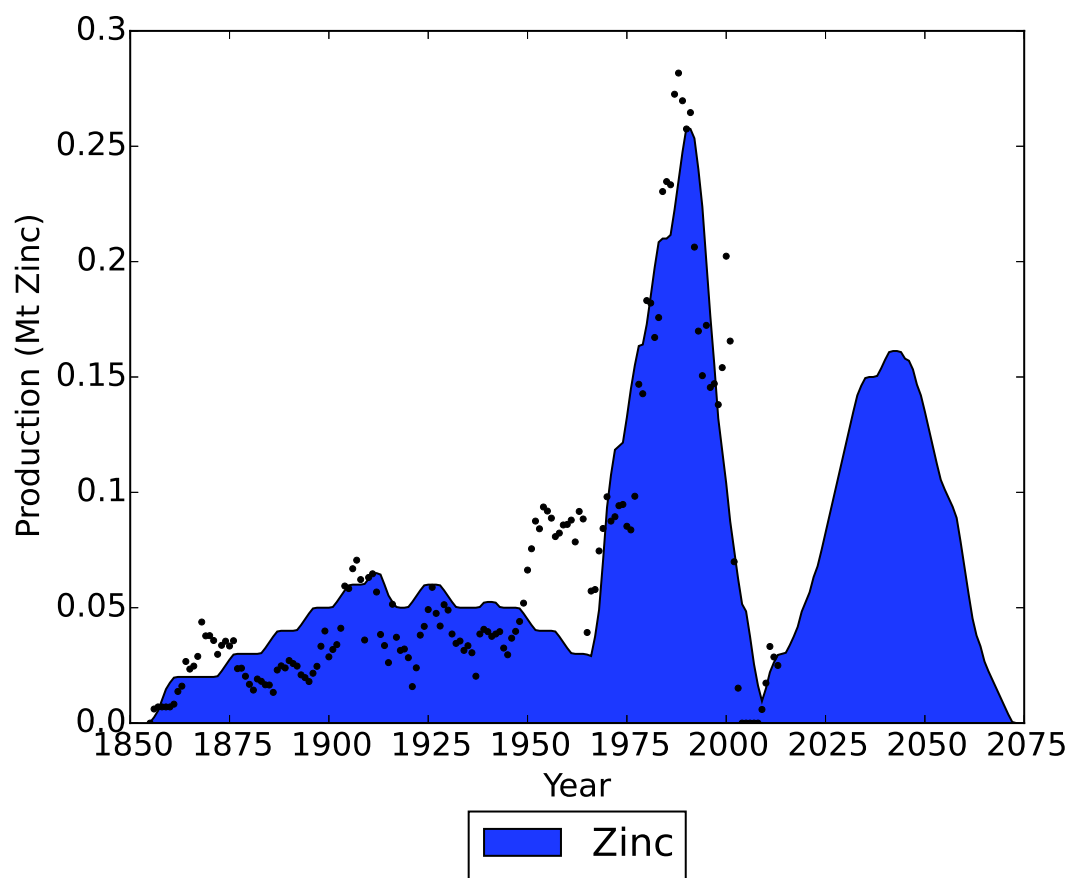

Figure 4.47: Spain projections capped at 16

| Table 4.47: Peak years - All |       |           |           |
|------------------------------|-------|-----------|-----------|
| Name                         | URR   | Peak Year | Peak Rate |
| Zinc                         | 16.24 | 1990      | 0.26      |
| Total                        | 16.24 | 1990      | 0.26      |

4.24.2 By Mineral

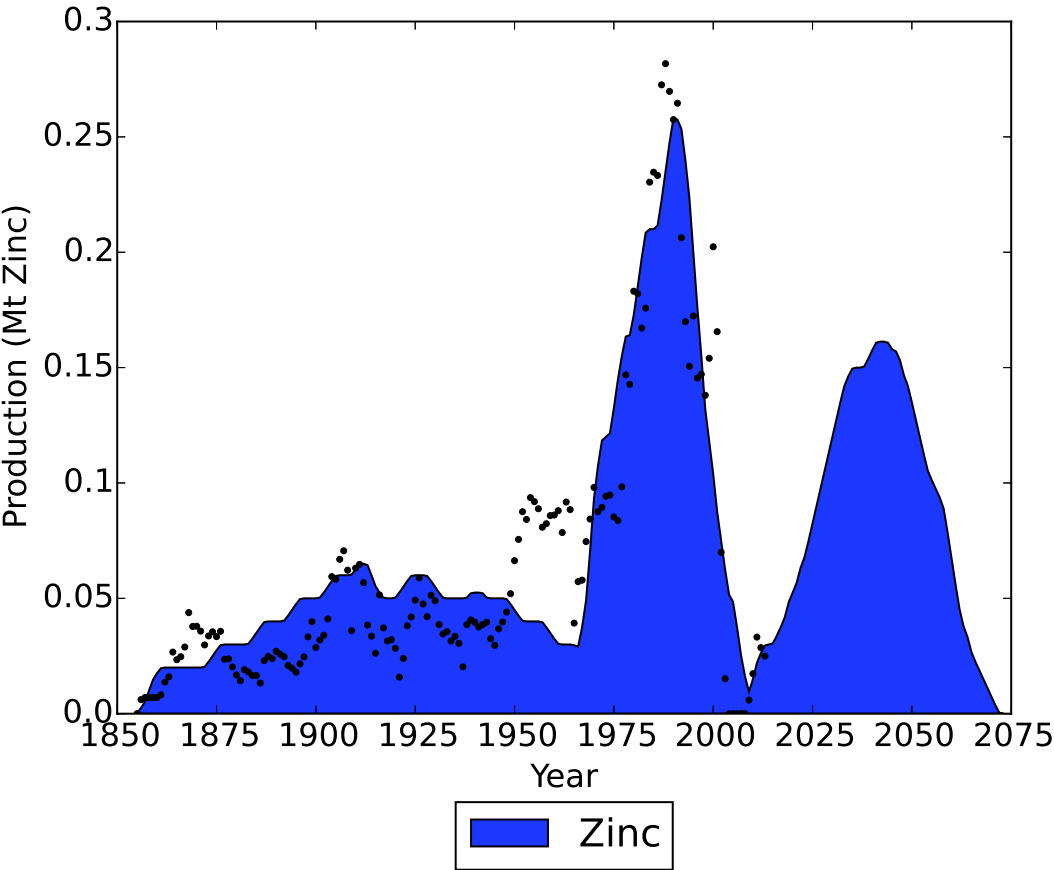

Figure 4.48: Spain projection by mineral type

Table 4.48: Peak years - Minerals

| Name  | URR   | Peak Year | Peak Rate |
|-------|-------|-----------|-----------|
| Zinc  | 16.24 | 1990      | 0.26      |
| Total | 16.24 | 1990      | 0.26      |



4.25 Sweden

4.25.1 All Projections

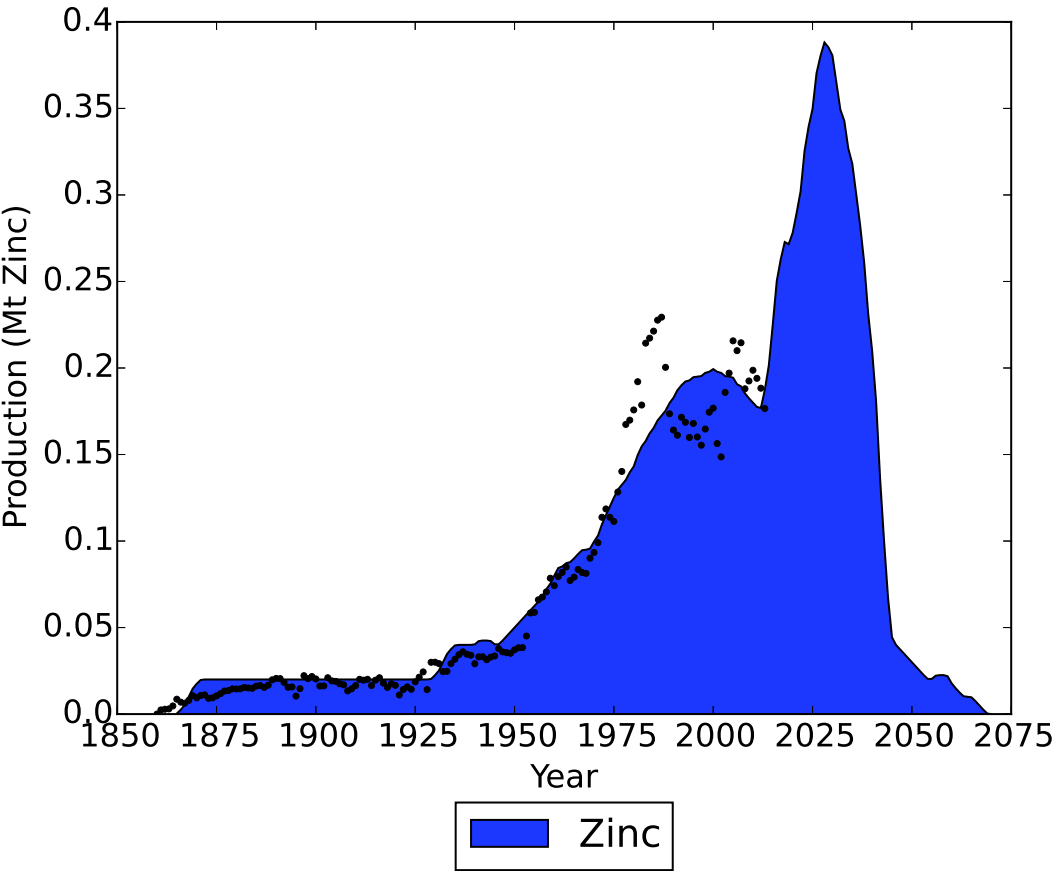

Figure 4.49: Sweden projections capped at 16

Table 4.49: Peak years - All

| Name  | URR   | Peak Year | Peak Rate |
|-------|-------|-----------|-----------|
| Zinc  | 20.19 | 2028      | 0.39      |
| Total | 20.19 | 2028      | 0.39      |

4.25.2 By Mineral

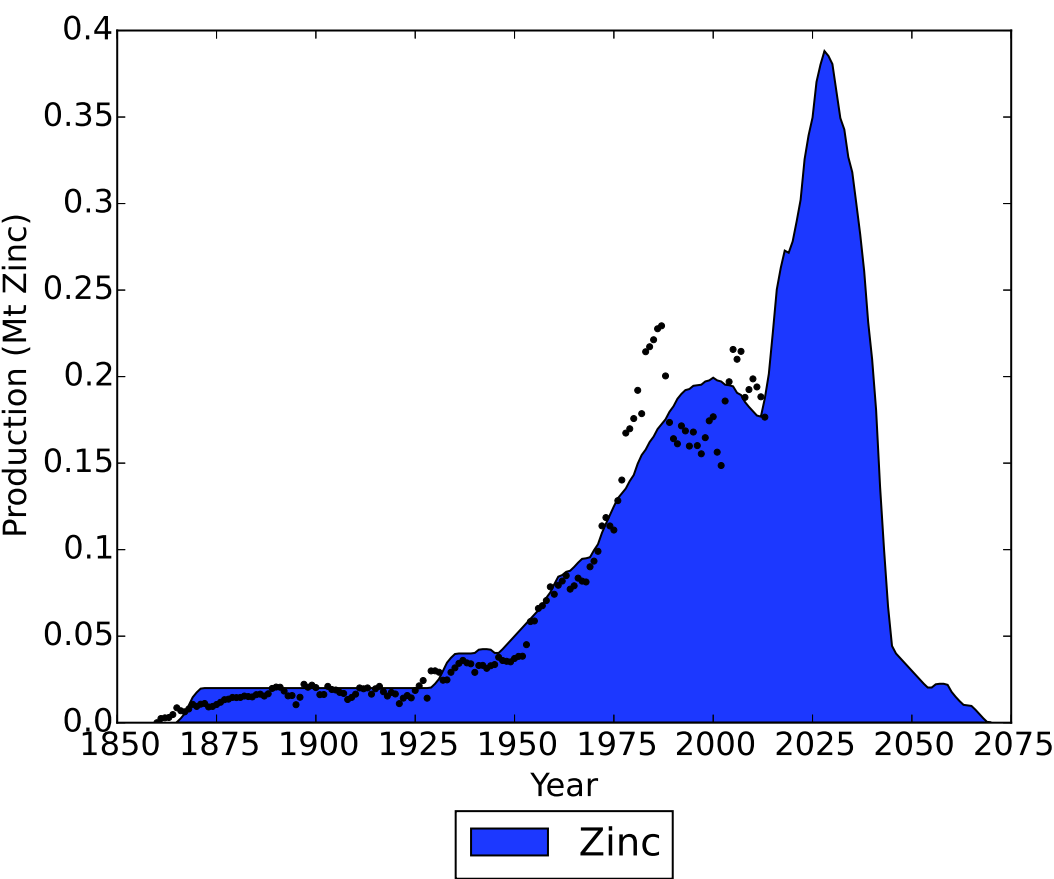

Figure 4.50: Sweden projection by mineral type

| Table 4.50: Peak years - Minerals |       |           |           |
|-----------------------------------|-------|-----------|-----------|
| Name                              | URR   | Peak Year | Peak Rate |
| Zinc                              | 20.19 | 2028      | 0.39      |
| Total                             | 20.19 | 2028      | 0.39      |

4.26 Turkey

4.26.1 All Projections

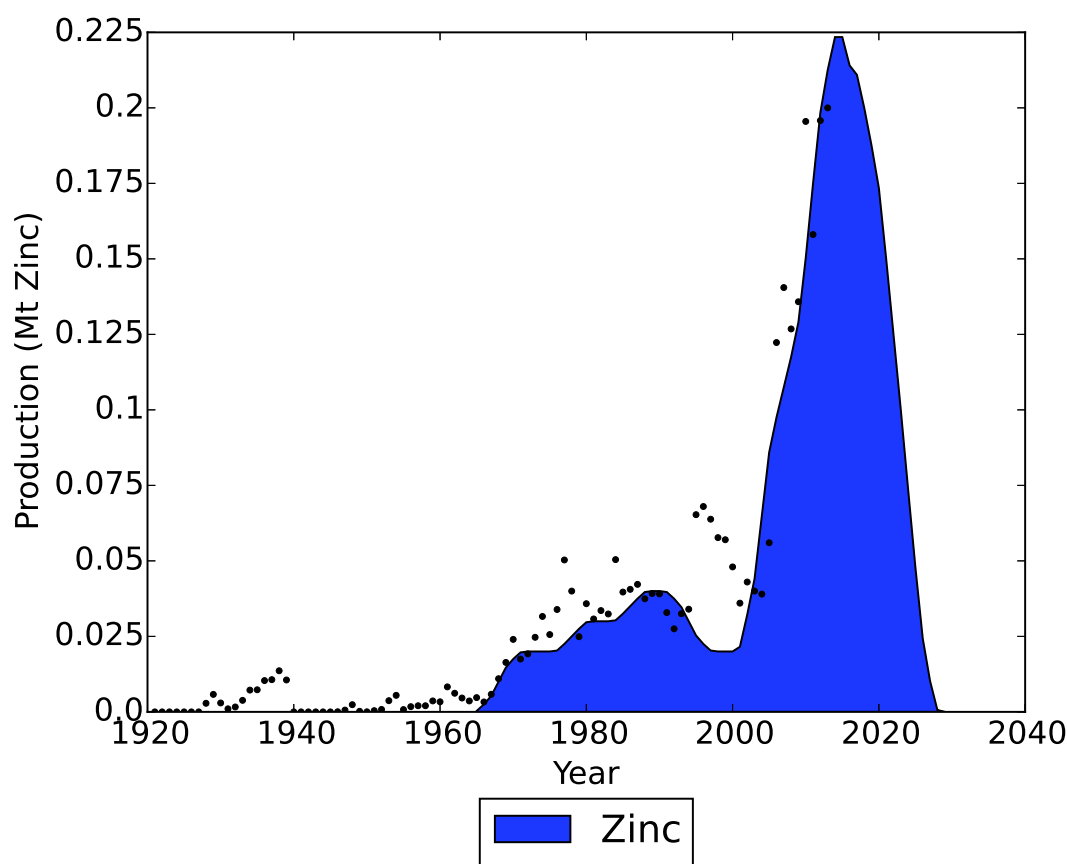

Figure 4.51: Turkey projections capped at 16

| Table 4.51: Peak years - All |      |           |           |
|------------------------------|------|-----------|-----------|
| Name                         | URR  | Peak Year | Peak Rate |
| Zinc                         | 4.29 | 2014      | 0.22      |
| Total                        | 4.29 | 2014      | 0.22      |

4.26.2 By Mineral

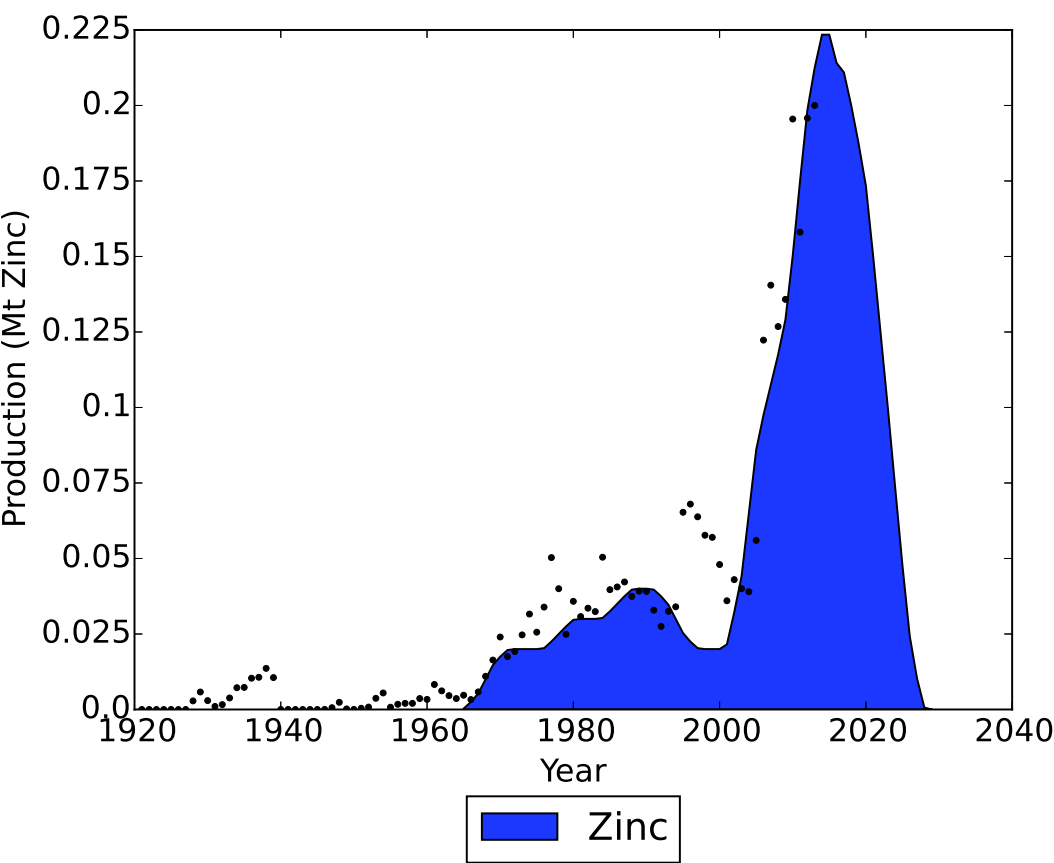

Figure 4.52: Turkey projection by mineral type

| Table 4.52: Peak years - Minerals |      |           |           |
|-----------------------------------|------|-----------|-----------|
| Name                              | URR  | Peak Year | Peak Rate |
| Zinc                              | 4.29 | 2014      | 0.22      |
| Total                             | 4.29 | 2014      | 0.22      |

4.27 UK

4.27.1 All Projections

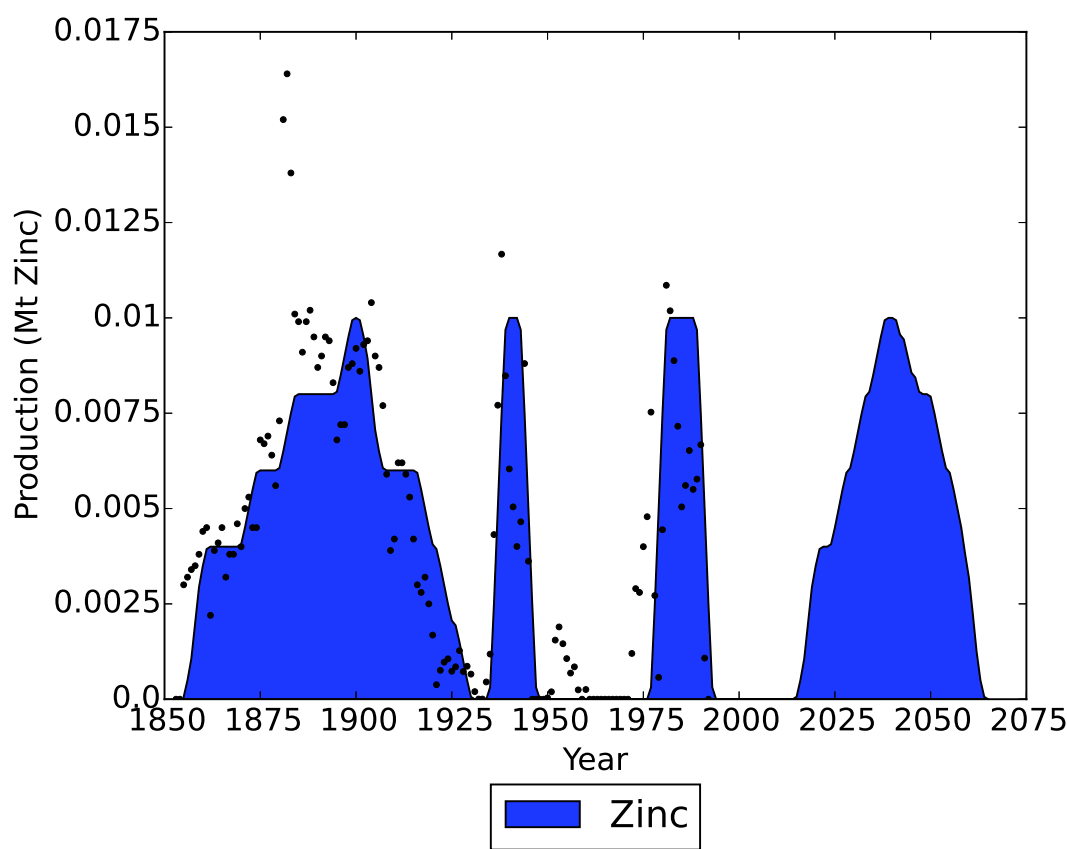

Figure 4.53: UK projections capped at 16

Table 4.53: Peak years - All

| Name  | URR  | Peak Year | Peak Rate |
|-------|------|-----------|-----------|
| Zinc  | 0.91 | 1900      | 0.01      |
| Total | 0.91 | 1900      | 0.01      |

4.27.2 By Mineral

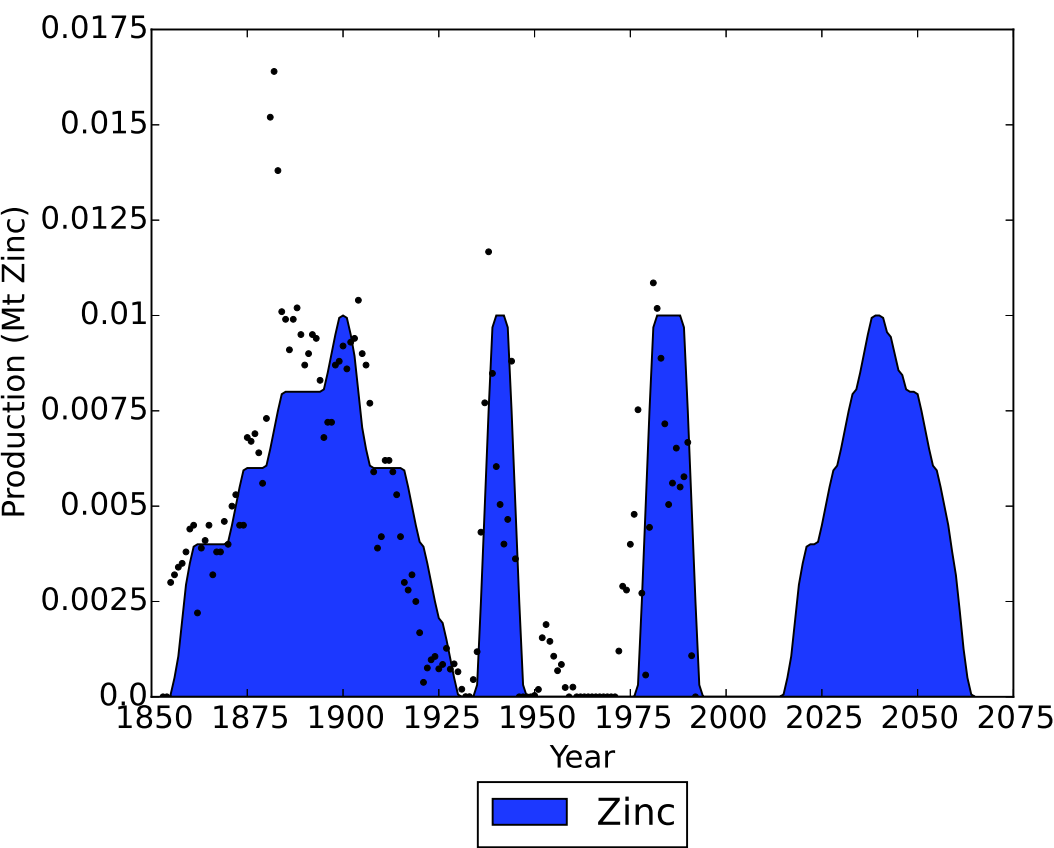

Figure 4.54: UK projection by mineral type

| Table 4.54: Peak years - Minerals |      |           |           |
|-----------------------------------|------|-----------|-----------|
| Name                              | URR  | Peak Year | Peak Rate |
| Zinc                              | 0.91 | 1900      | 0.01      |
| Total                             | 0.91 | 1900      | 0.01      |

4.28 Yugoslavia

4.28.1 All Projections

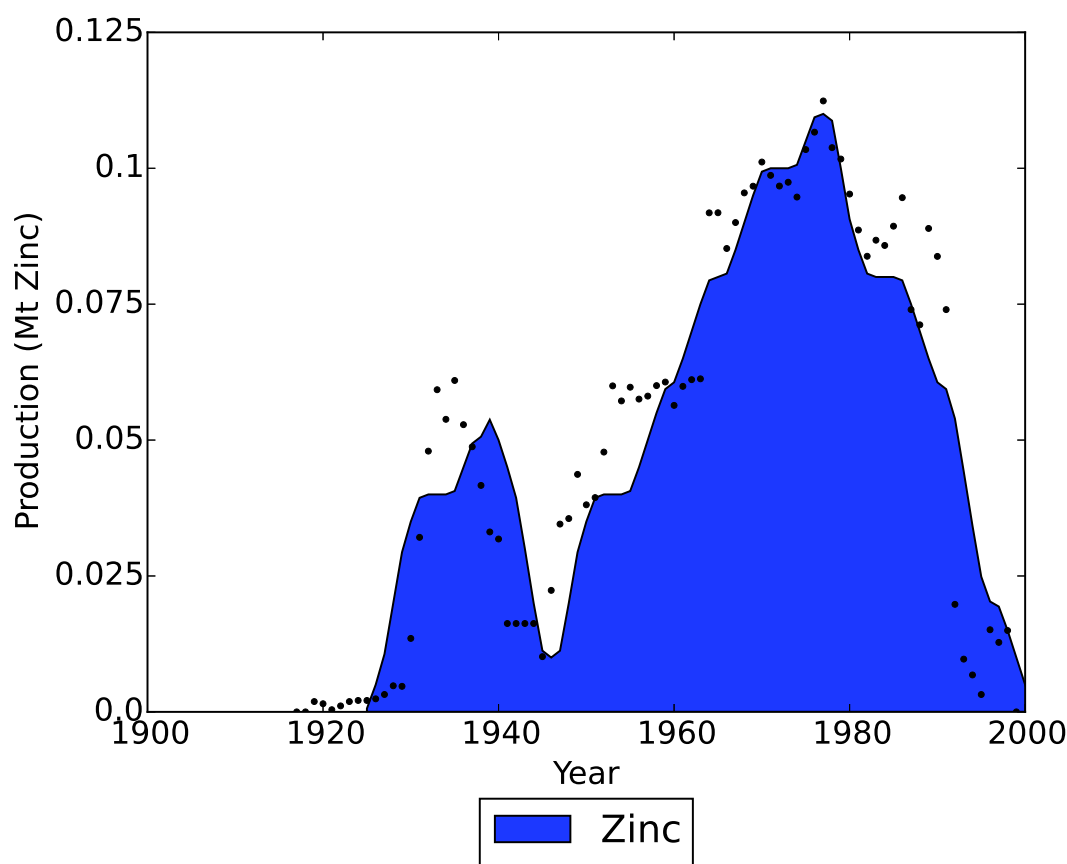

Figure 4.55: Yugoslavia projections capped at 16

| Table 4.55: Peak years - All |      |           |           |
|------------------------------|------|-----------|-----------|
| Name                         | URR  | Peak Year | Peak Rate |
| Zinc                         | 4.16 | 1977      | 0.11      |
| Total                        | 4.16 | 1977      | 0.11      |

4.28.2 By Mineral

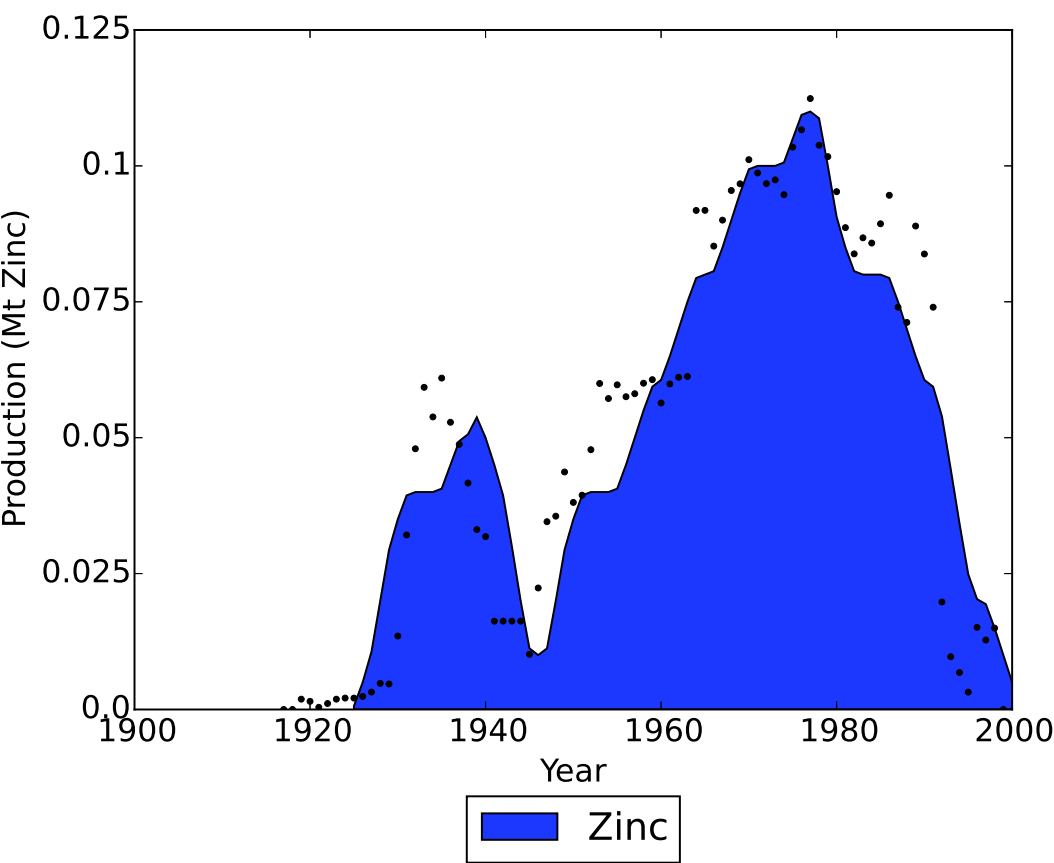

Figure 4.56: Yugoslavia projection by mineral type

| Table 4.56: Peak years - Minerals |      |           |           |
|-----------------------------------|------|-----------|-----------|
| Name                              | URR  | Peak Year | Peak Rate |
| Zinc                              | 4.16 | 1977      | 0.11      |
| Total                             | 4.16 | 1977      | 0.11      |



4.29 Total

4.29.1 By country

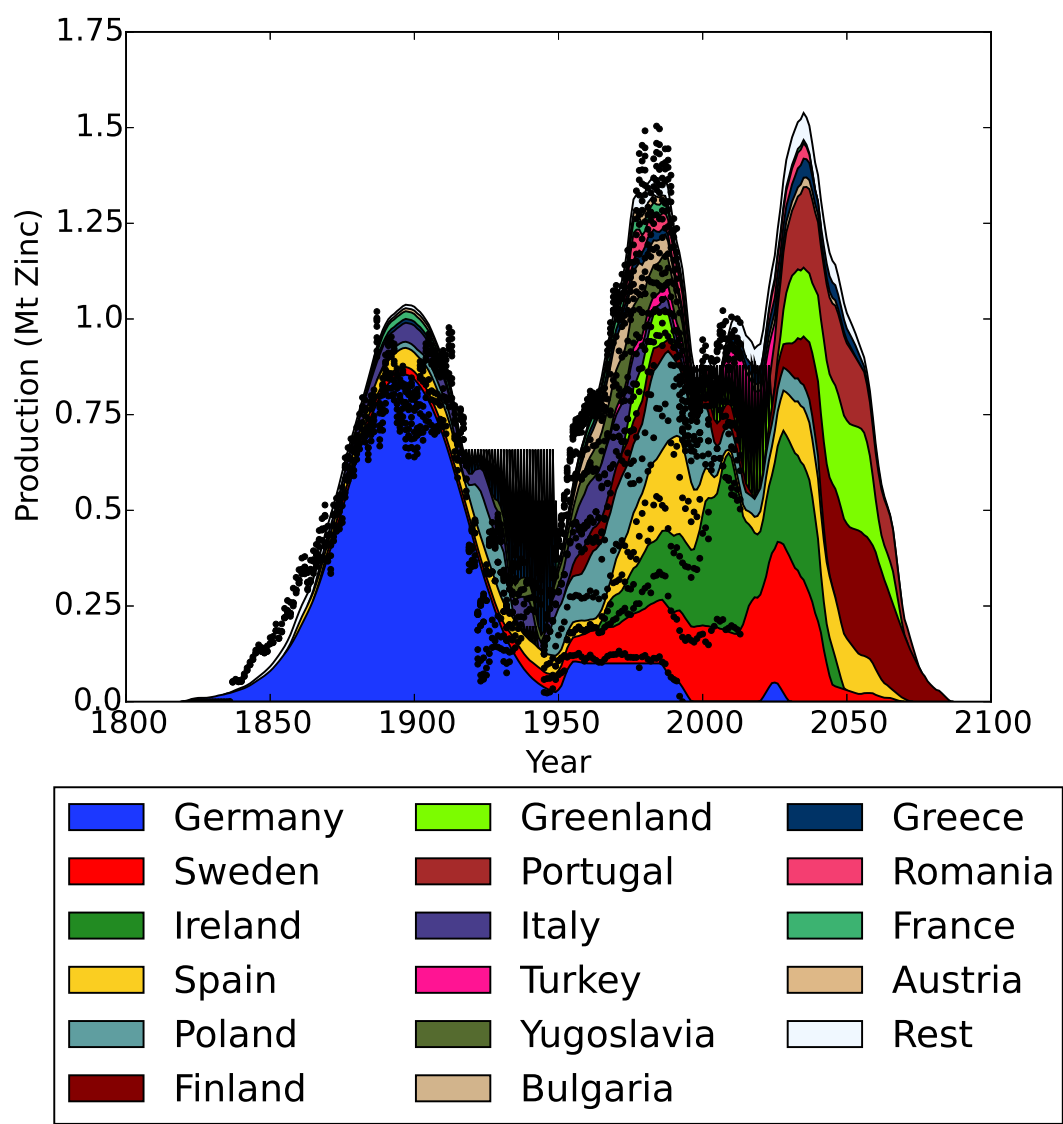

Figure 4.57: Europe projections by country

Table 4.57: Peak years - All

| <b>Name</b>            | <b>URR</b>    | <b>Peak Year</b> | <b>Peak Rate</b> |
|------------------------|---------------|------------------|------------------|
| Germany                | 48.18         | 1897             | 0.85             |
| Sweden                 | 20.19         | 2028             | 0.39             |
| Ireland                | 17.88         | 2009             | 0.47             |
| Spain                  | 16.24         | 1990             | 0.26             |
| Poland                 | 14.21         | 1984             | 0.24             |
| Finland                | 13.82         | 2054             | 0.32             |
| Greenland              | 9.45          | 2048             | 0.27             |
| Portugal               | 8.56          | 2037             | 0.22             |
| Italy                  | 7.68          | 1966             | 0.15             |
| Turkey                 | 4.29          | 2014             | 0.22             |
| Yugoslavia             | 4.16          | 1977             | 0.11             |
| Bulgaria               | 3.47          | 1974             | 0.09             |
| Greece                 | 2.87          | 2034             | 0.05             |
| Romania                | 2.0           | 1976             | 0.07             |
| France                 | 1.88          | 1969             | 0.03             |
| Austria                | 1.1           | 1977             | 0.02             |
| Bosnia and Herzegovina | 1.02          | 2038             | 0.03             |
| Norway                 | 1.0           | 1979             | 0.03             |
| UK                     | 0.91          | 1900             | 0.01             |
| Belgium                | 0.89          | 1862             | 0.03             |
| Macedonia              | 0.7           | 2012             | 0.03             |
| Serbia                 | 0.67          | 2038             | 0.02             |
| Montenegro             | 0.37          | 2026             | 0.01             |
| Czechoslovakia         | 0.19          | 1975             | 0.01             |
| Kosovo                 | 0.11          | 2013             | 0.01             |
| Hungary                | 0.08          | 1972             | —                |
| Slovenia               | —             | 1994             | —                |
| Slovakia               | —             | 2013             | —                |
| <b>Total</b>           | <b>181.92</b> | <b>2035</b>      | <b>1.54</b>      |

4.29.2 By mineral

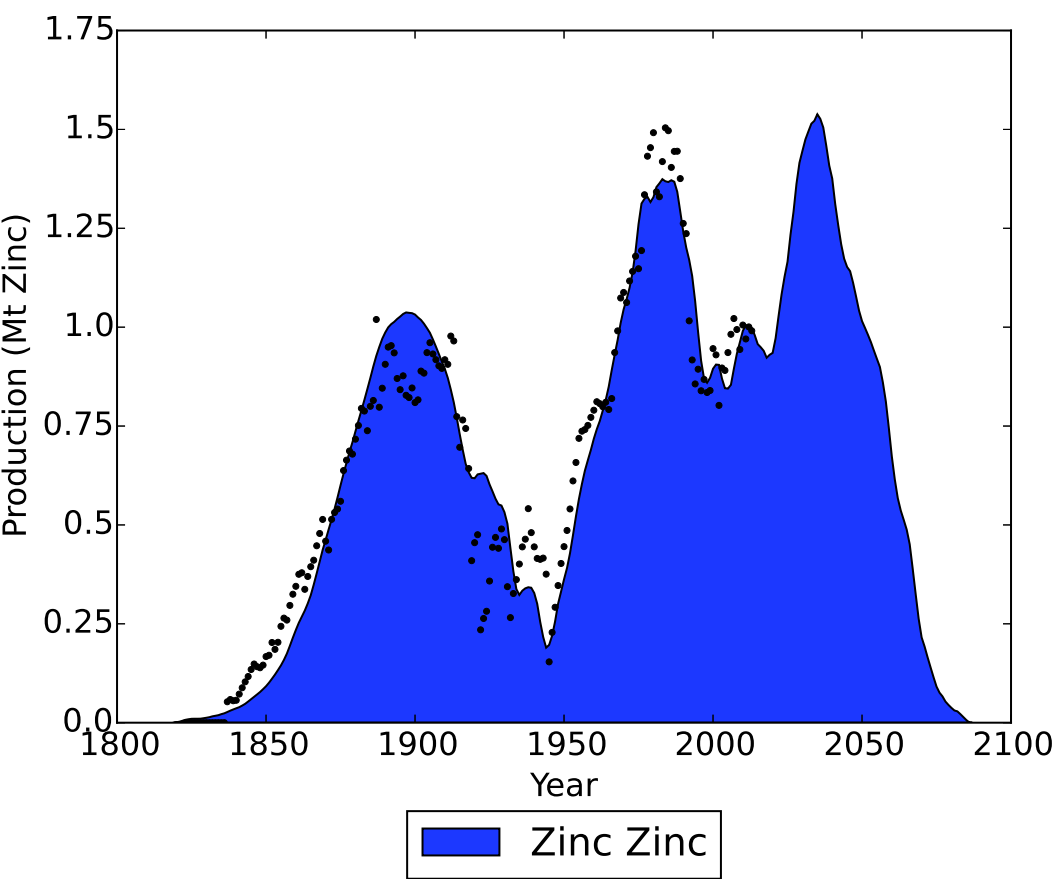

Figure 4.58: Europe projection by mineral type

| Table 4.58: Peak years - Minerals |        |           |           |
|-----------------------------------|--------|-----------|-----------|
| Name                              | URR    | Peak Year | Peak Rate |
| Zinc Zinc                         | 181.92 | 2035      | 1.54      |
| Total                             | 181.92 | 2035      | 1.54      |

# Chapter 5

## FSU

### 5.1 FSU

#### 5.1.1 All Projections

Table 5.1: Peak years - All

| Name         | URR           | Peak Year   | Peak Rate   |
|--------------|---------------|-------------|-------------|
| Zinc         | 138.03        | 2046        | 2.06        |
| <b>Total</b> | <b>138.03</b> | <b>2046</b> | <b>2.06</b> |

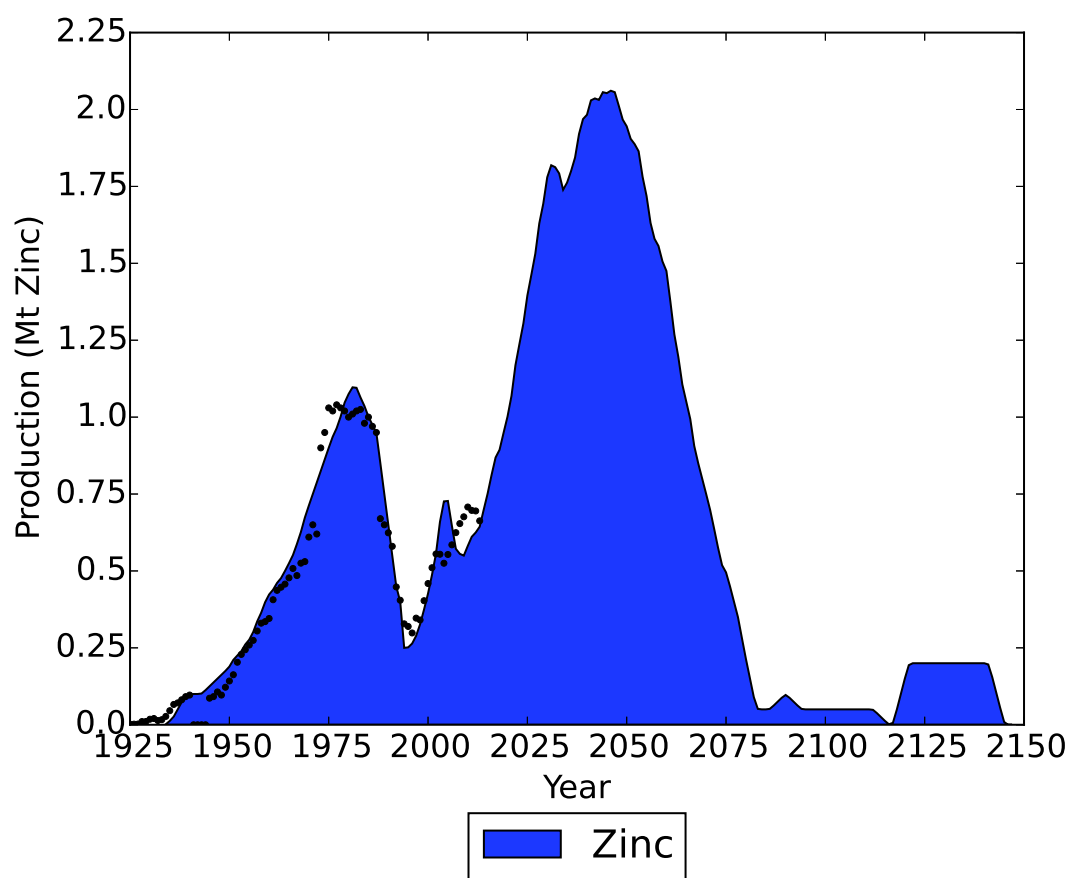

Figure 5.1: FSU projections capped at 16

5.1.2 By Mineral

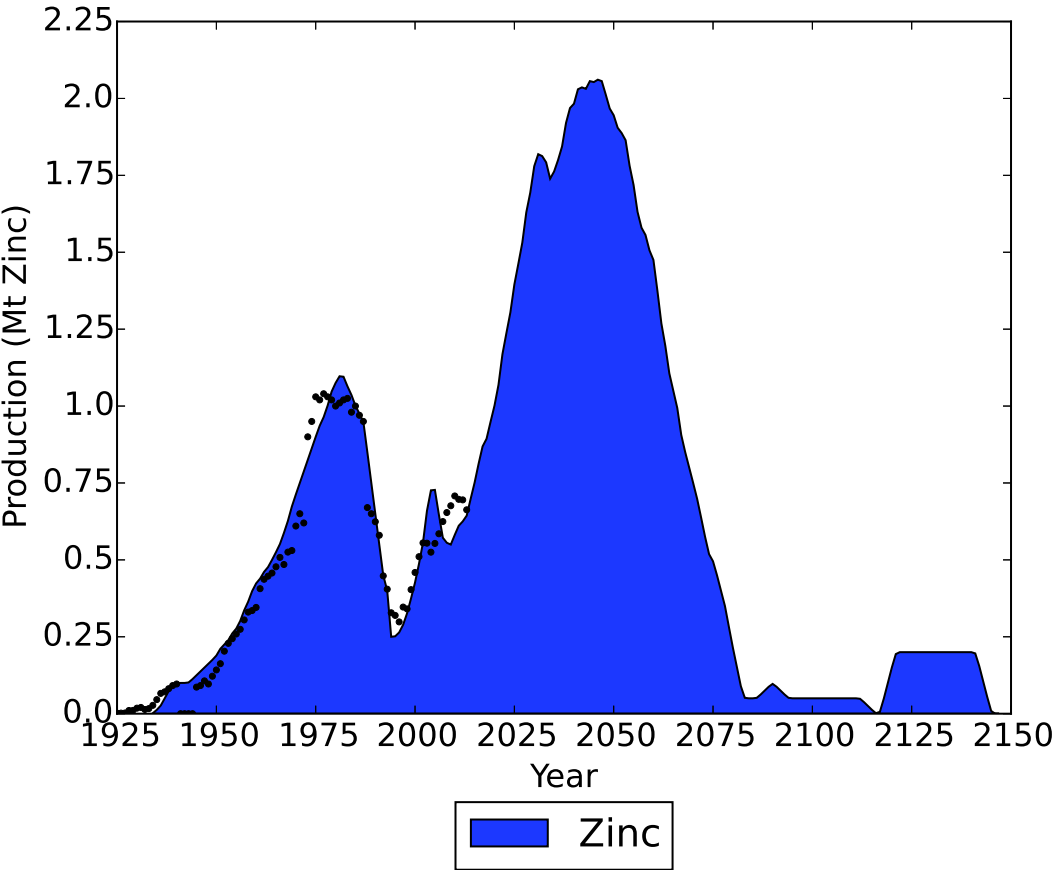

Figure 5.2: FSU projection by mineral type

| Table 5.2: Peak years - Minerals |        |           |           |
|----------------------------------|--------|-----------|-----------|
| Name                             | URR    | Peak Year | Peak Rate |
| Zinc                             | 138.03 | 2046      | 2.06      |
| Total                            | 138.03 | 2046      | 2.06      |

5.2 Total

5.2.1 By country

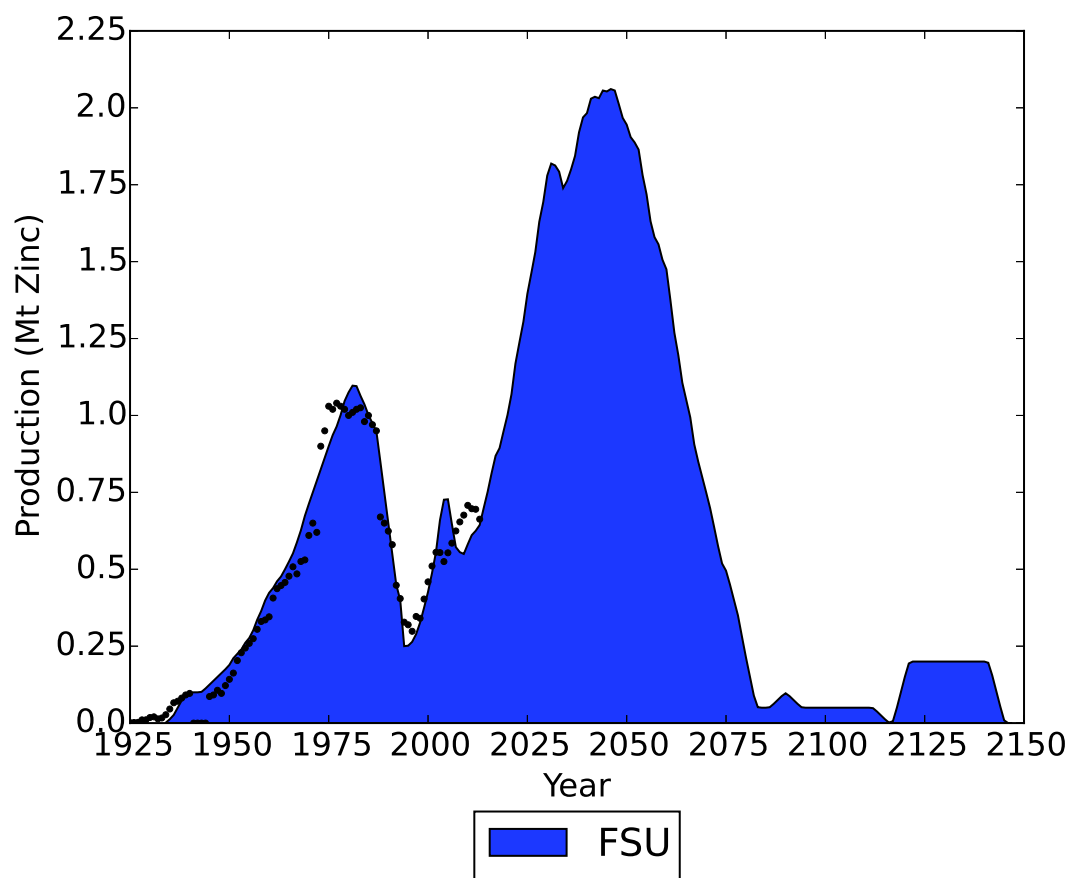

Figure 5.3: FSU projections by country

| Table 5.3: Peak years - All |        |           |           |
|-----------------------------|--------|-----------|-----------|
| Name                        | URR    | Peak Year | Peak Rate |
| FSU                         | 138.03 | 2046      | 2.06      |
| Total                       | 138.03 | 2046      | 2.06      |

5.2.2 By mineral

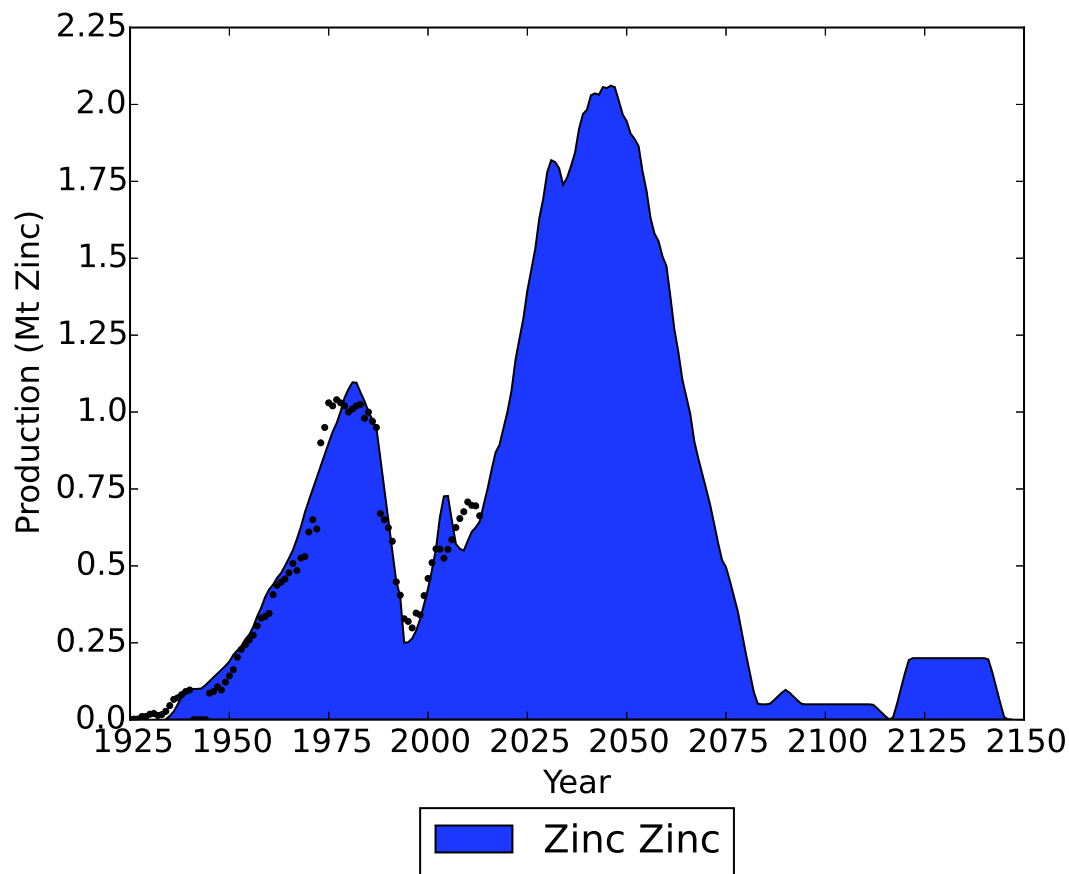

Figure 5.4: FSU projection by mineral type

| Table 5.4: Peak years - Minerals |        |           |           |
|----------------------------------|--------|-----------|-----------|
| Name                             | URR    | Peak Year | Peak Rate |
| Zinc Zinc                        | 138.03 | 2046      | 2.06      |
| Total                            | 138.03 | 2046      | 2.06      |



## Chapter 6

# North America

### 6.1 Canada

#### 6.1.1 All Projections

Table 6.1: Peak years - All

| Name         | URR           | Peak Year   | Peak Rate  |
|--------------|---------------|-------------|------------|
| Zinc         | 139.81        | 2060        | 2.1        |
| <b>Total</b> | <b>139.81</b> | <b>2060</b> | <b>2.1</b> |

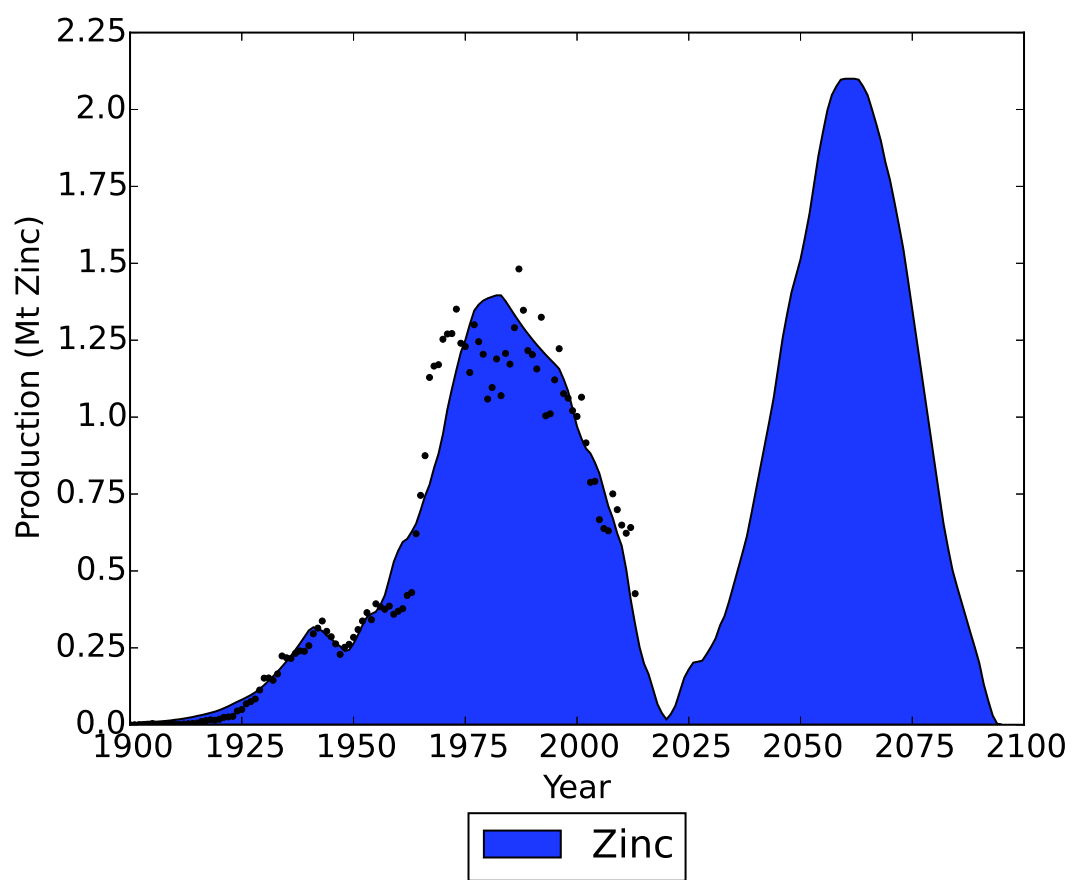

Figure 6.1: Canada projections capped at 16

6.1.2 By Mineral

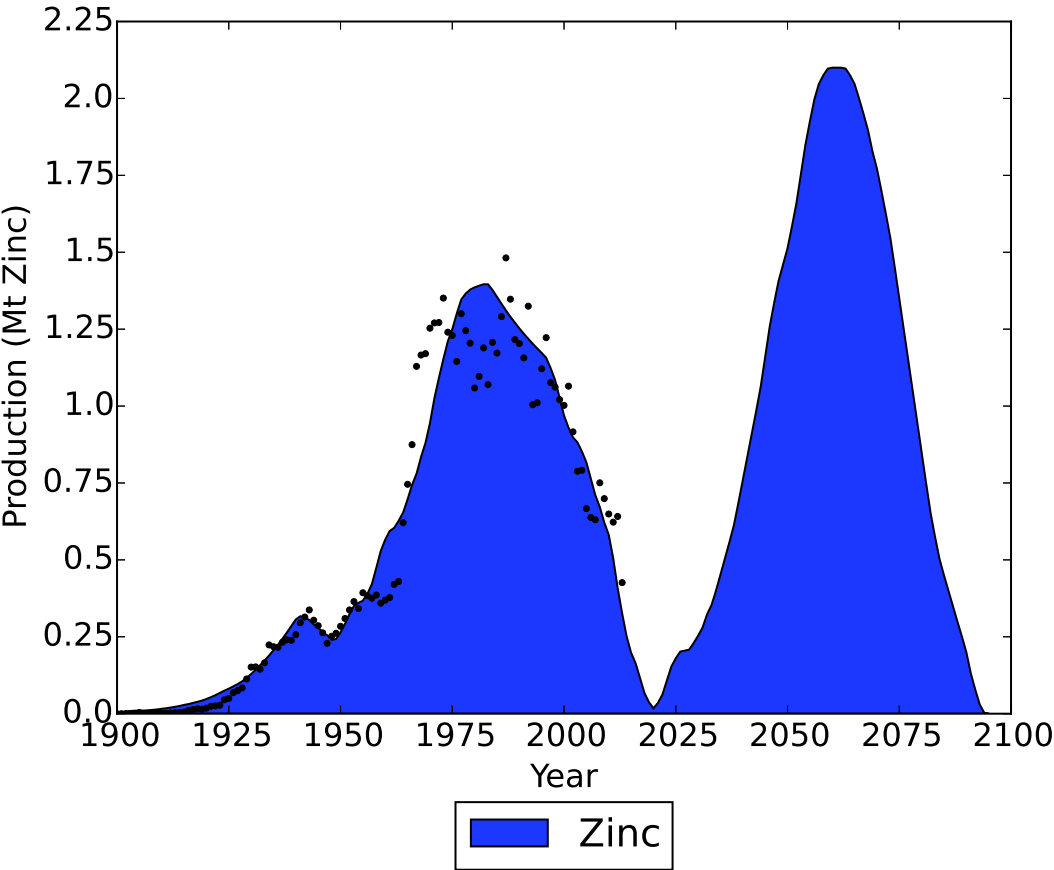

Figure 6.2: Canada projection by mineral type

| Table 6.2: Peak years - Minerals |        |           |           |
|----------------------------------|--------|-----------|-----------|
| Name                             | URR    | Peak Year | Peak Rate |
| Zinc                             | 139.81 | 2060      | 2.1       |
| Total                            | 139.81 | 2060      | 2.1       |

6.2 USA

6.2.1 All Projections

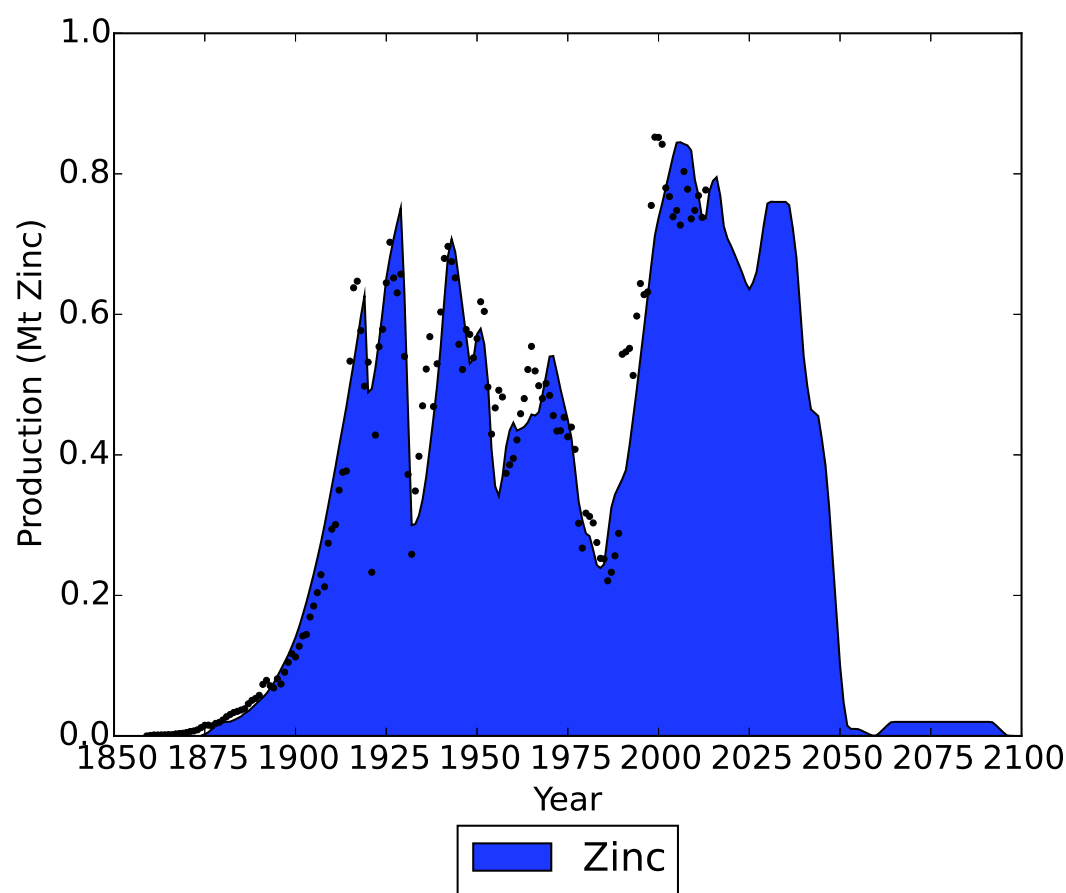

| Table 6.3: Peak years - All |       |           |           |
|-----------------------------|-------|-----------|-----------|
| Name                        | URR   | Peak Year | Peak Rate |
| Zinc                        | 80.96 | 2006      | 0.85      |
| Total                       | 80.96 | 2006      | 0.85      |

6.2.2 By Mineral

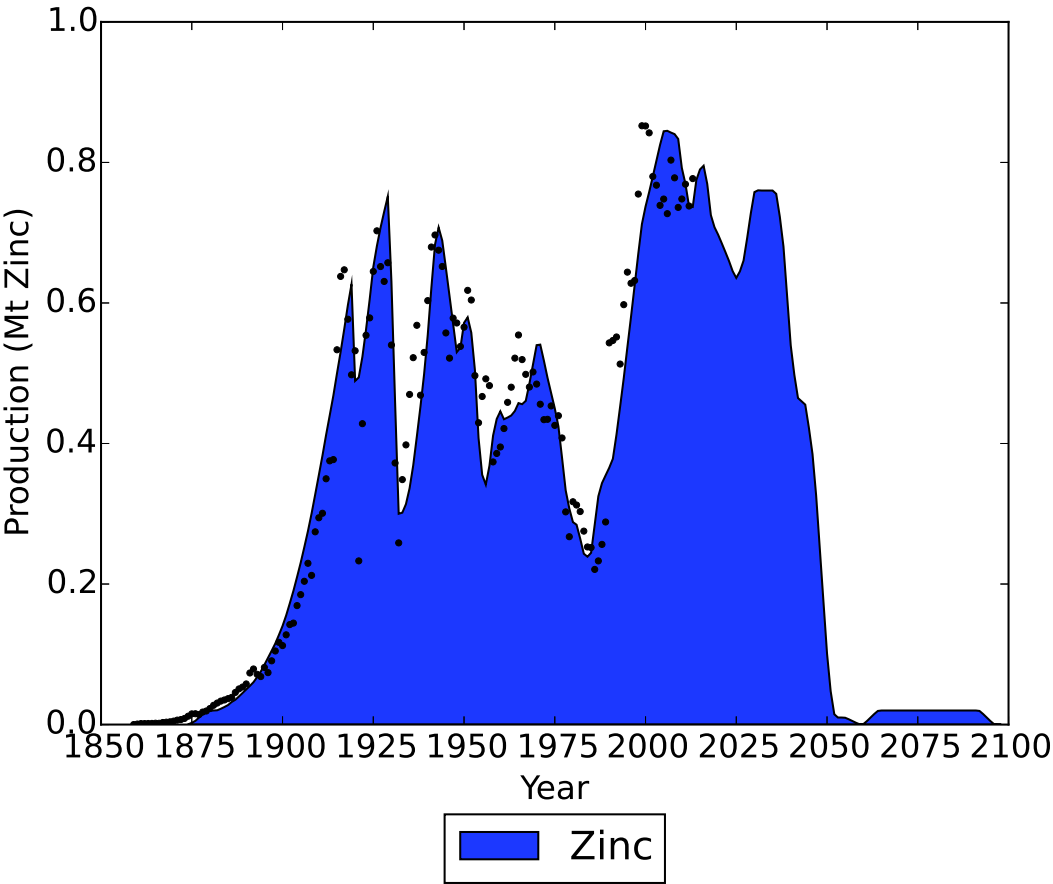

Figure 6.4: USA projection by mineral type

| Table 6.4: Peak years - Minerals |              |             |             |
|----------------------------------|--------------|-------------|-------------|
| Name                             | URR          | Peak Year   | Peak Rate   |
| Zinc                             | 80.96        | 2006        | 0.85        |
| <b>Total</b>                     | <b>80.96</b> | <b>2006</b> | <b>0.85</b> |

6.3 Total

6.3.1 By country

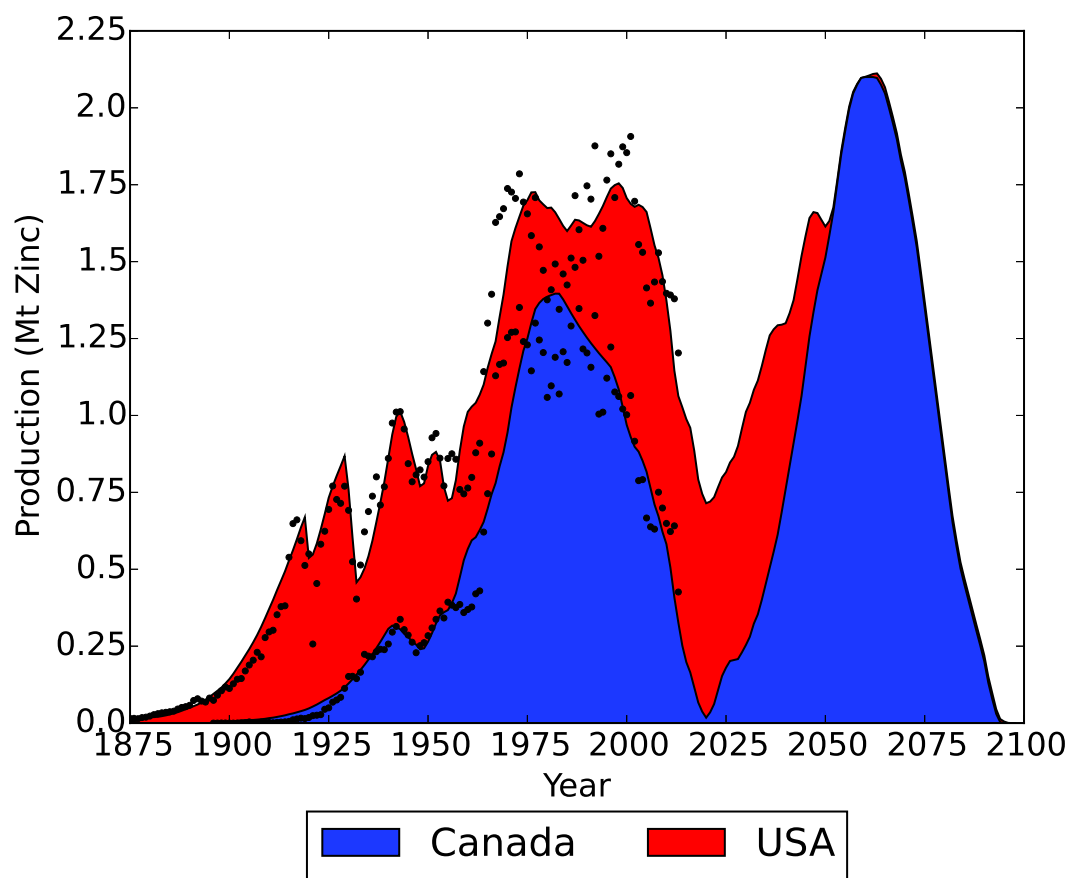

Figure 6.5: North America projections by country

| Table 6.5: Peak years - All |               |             |             |
|-----------------------------|---------------|-------------|-------------|
| Name                        | URR           | Peak Year   | Peak Rate   |
| Canada                      | 139.81        | 2060        | 2.1         |
| USA                         | 80.96         | 2006        | 0.85        |
| <b>Total</b>                | <b>220.78</b> | <b>2063</b> | <b>2.11</b> |

6.3.2 By mineral

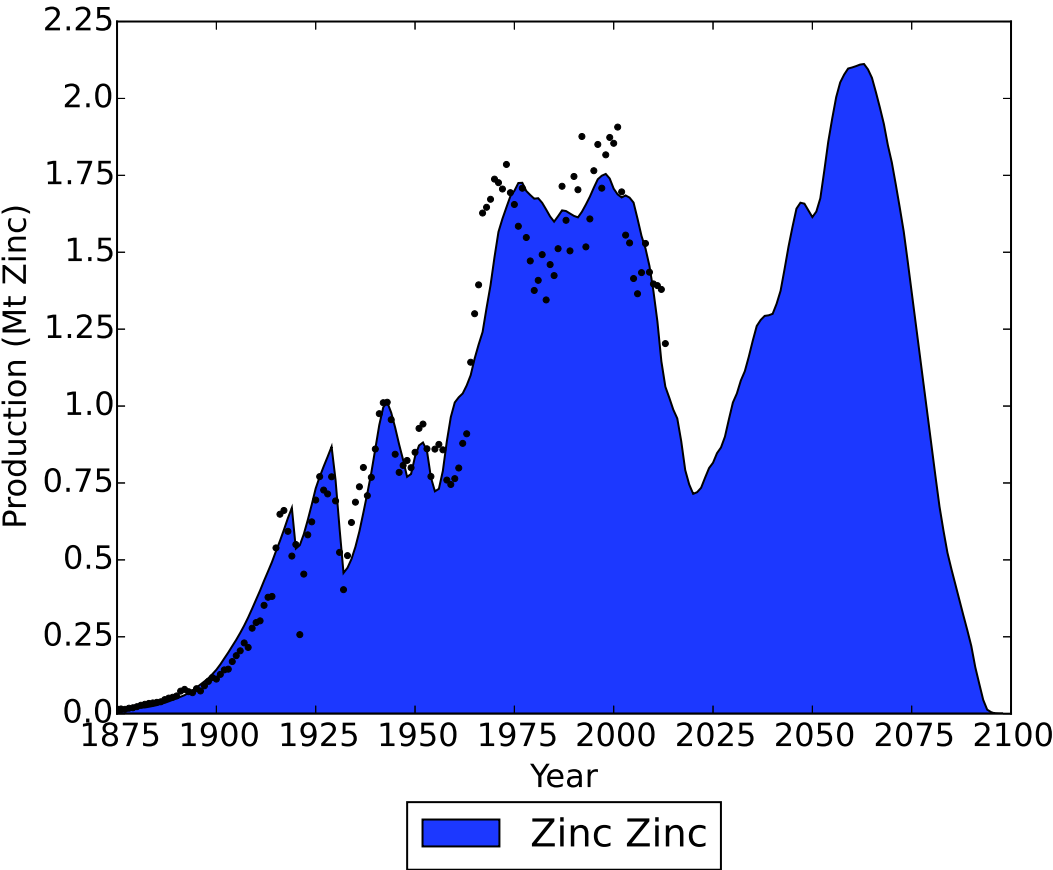

Figure 6.6: North America projection by mineral type

| Table 6.6: Peak years - Minerals |        |           |           |
|----------------------------------|--------|-----------|-----------|
| Name                             | URR    | Peak Year | Peak Rate |
| Zinc Zinc                        | 220.78 | 2063      | 2.11      |
| Total                            | 220.78 | 2063      | 2.11      |

# Chapter 7

## South America

### 7.1 Argentina

#### 7.1.1 All Projections

Table 7.1: Peak years - All

| Name  | URR  | Peak Year | Peak Rate |
|-------|------|-----------|-----------|
| Zinc  | 4.31 | 2023      | 0.12      |
| Total | 4.31 | 2023      | 0.12      |



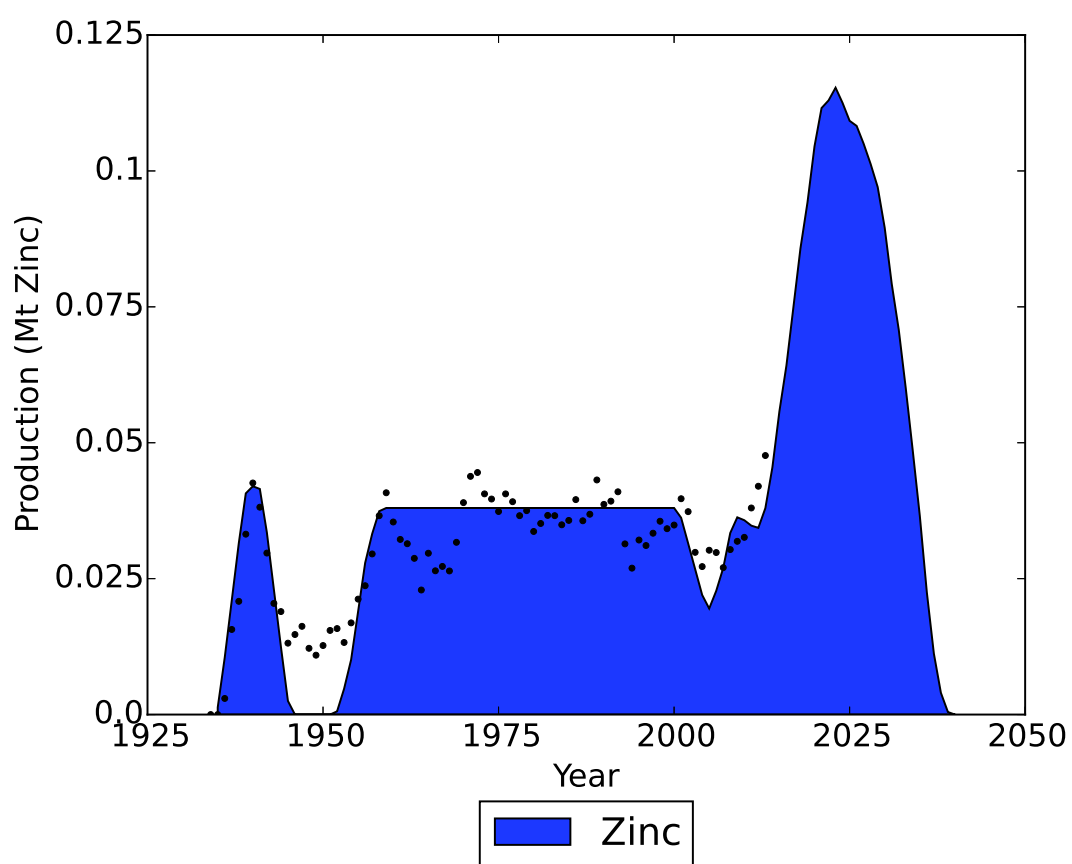

Figure 7.1: Argentina projections capped at 16

7.1.2 By Mineral

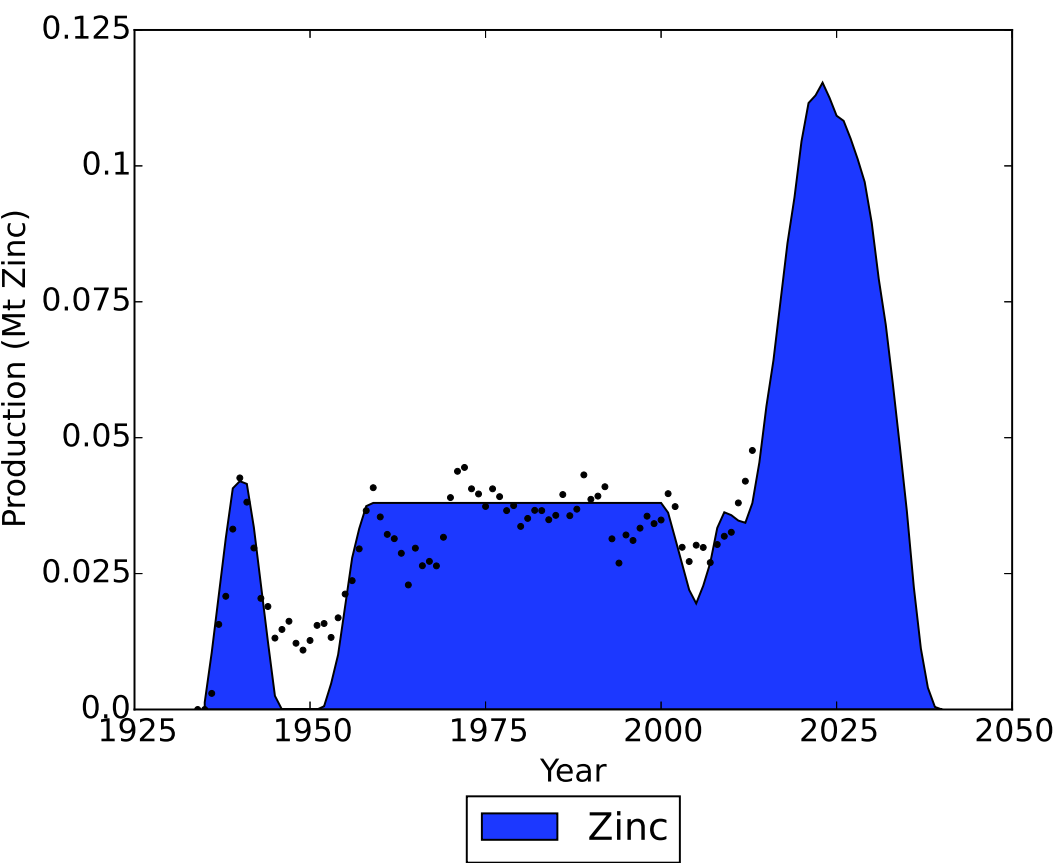

Figure 7.2: Argentina projection by mineral type

| Table 7.2: Peak years - Minerals |      |           |           |
|----------------------------------|------|-----------|-----------|
| Name                             | URR  | Peak Year | Peak Rate |
| Zinc                             | 4.31 | 2023      | 0.12      |
| Total                            | 4.31 | 2023      | 0.12      |

## 7.2 Bolivia

### 7.2.1 All Projections

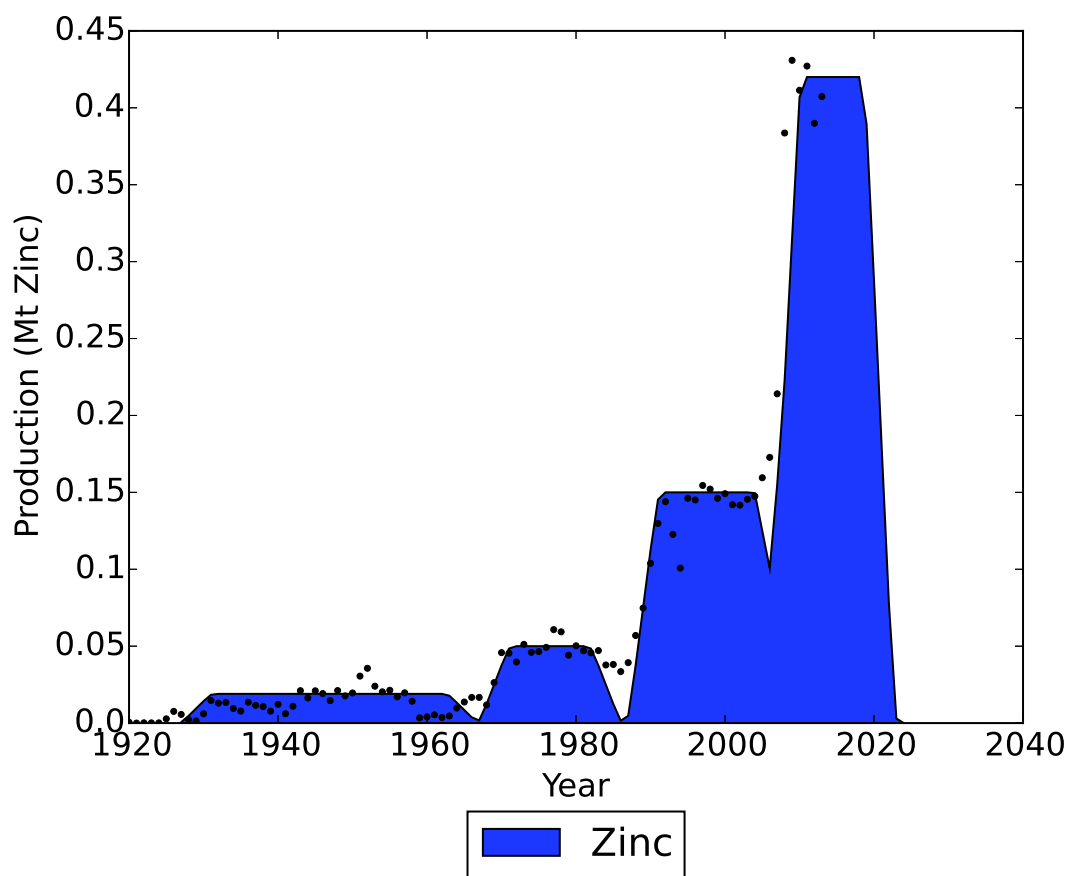

Figure 7.3: Bolivia projections capped at 16

| Table 7.3: Peak years - All |             |             |             |
|-----------------------------|-------------|-------------|-------------|
| Name                        | URR         | Peak Year   | Peak Rate   |
| Zinc                        | 9.38        | 2011        | 0.42        |
| <b>Total</b>                | <b>9.38</b> | <b>2011</b> | <b>0.42</b> |

7.2.2 By Mineral

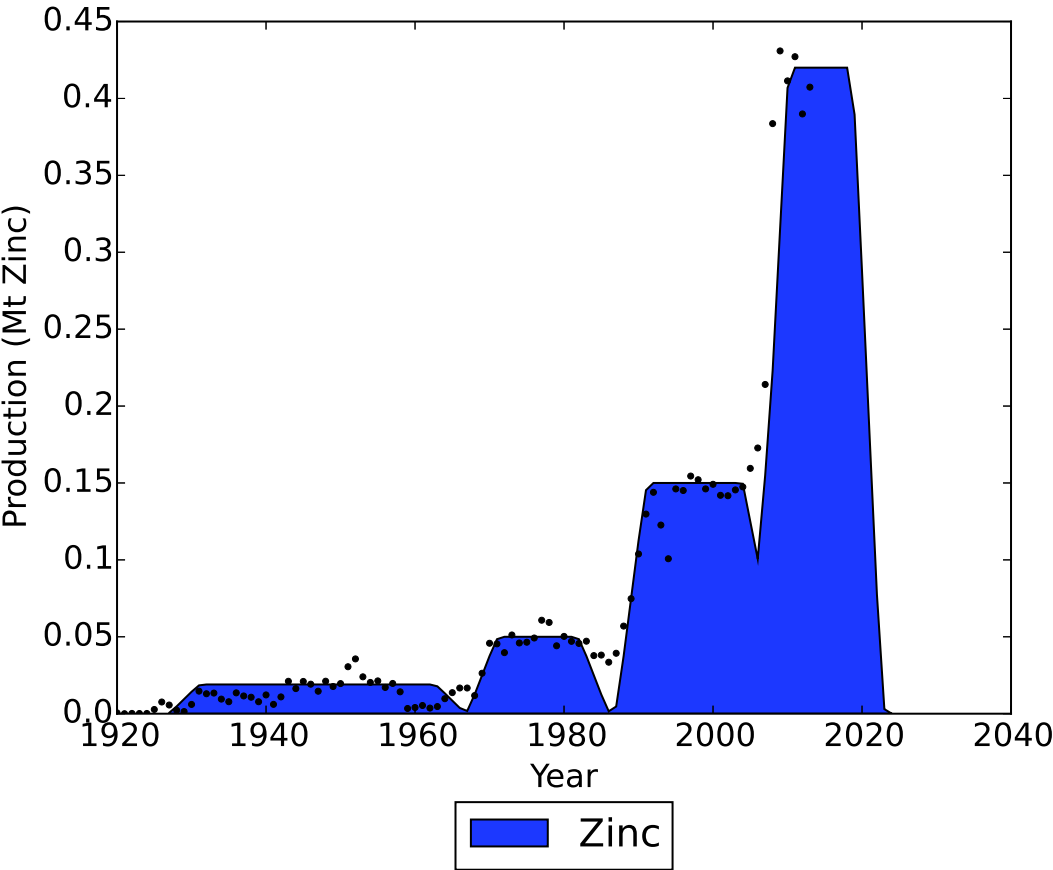

Figure 7.4: Bolivia projection by mineral type

| Table 7.4: Peak years - Minerals |      |           |           |
|----------------------------------|------|-----------|-----------|
| Name                             | URR  | Peak Year | Peak Rate |
| Zinc                             | 9.38 | 2011      | 0.42      |
| Total                            | 9.38 | 2011      | 0.42      |

7.3 Brazil

7.3.1 All Projections

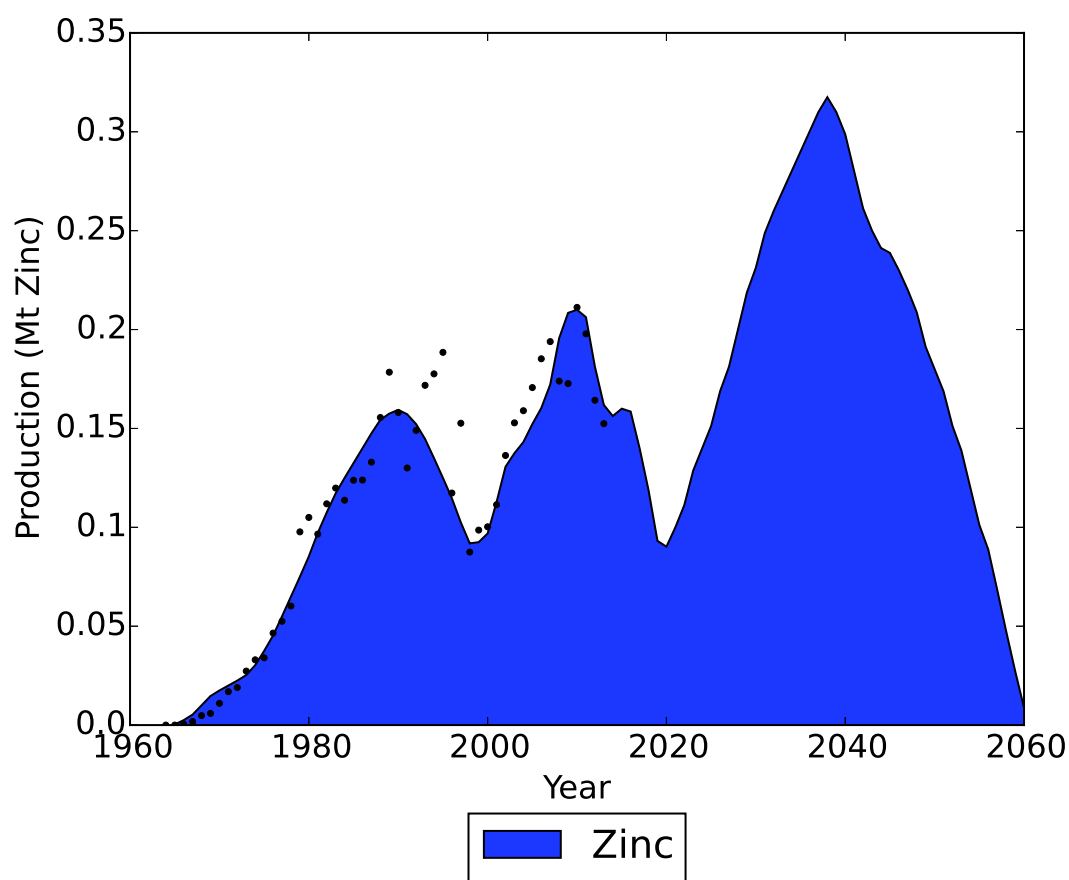

Figure 7.5: Brazil projections capped at 16

Table 7.5: Peak years - All

| Name  | URR   | Peak Year | Peak Rate |
|-------|-------|-----------|-----------|
| Zinc  | 13.89 | 2038      | 0.32      |
| Total | 13.89 | 2038      | 0.32      |

7.3.2 By Mineral

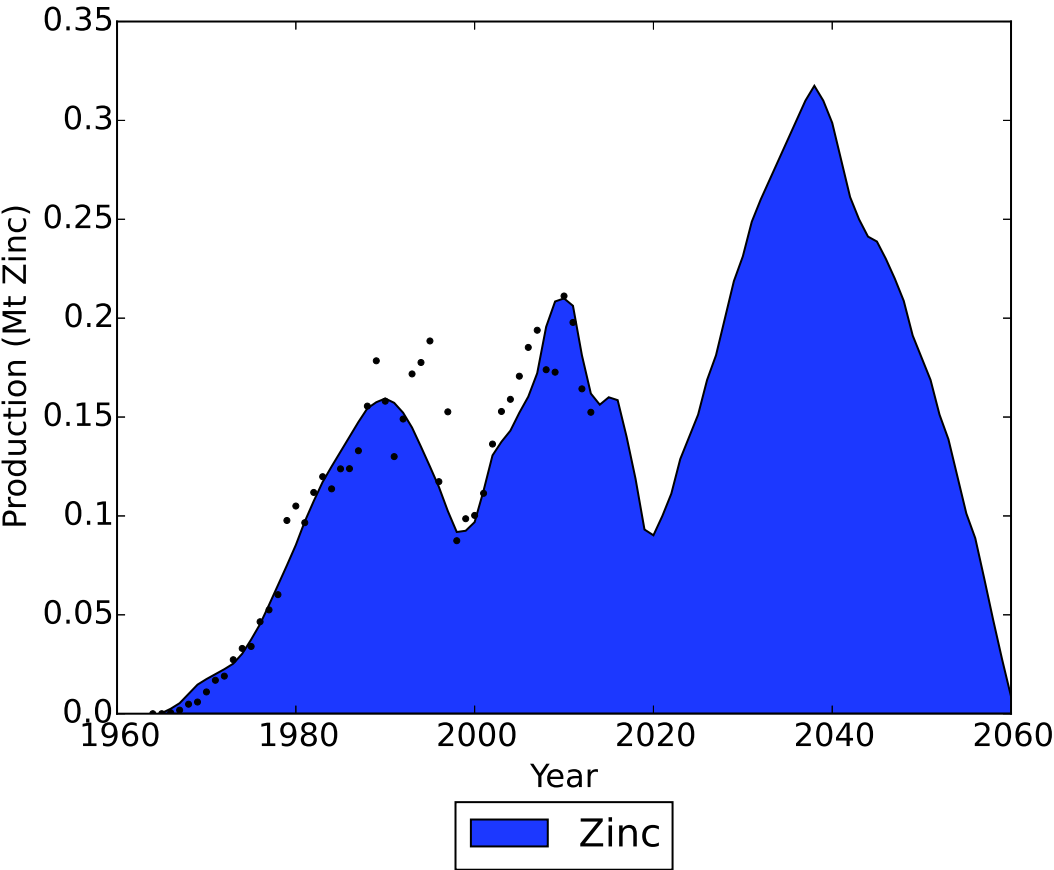

Figure 7.6: Brazil projection by mineral type

| Table 7.6: Peak years - Minerals |       |           |           |
|----------------------------------|-------|-----------|-----------|
| Name                             | URR   | Peak Year | Peak Rate |
| Zinc                             | 13.89 | 2038      | 0.32      |
| Total                            | 13.89 | 2038      | 0.32      |

7.4 Chile

7.4.1 All Projections

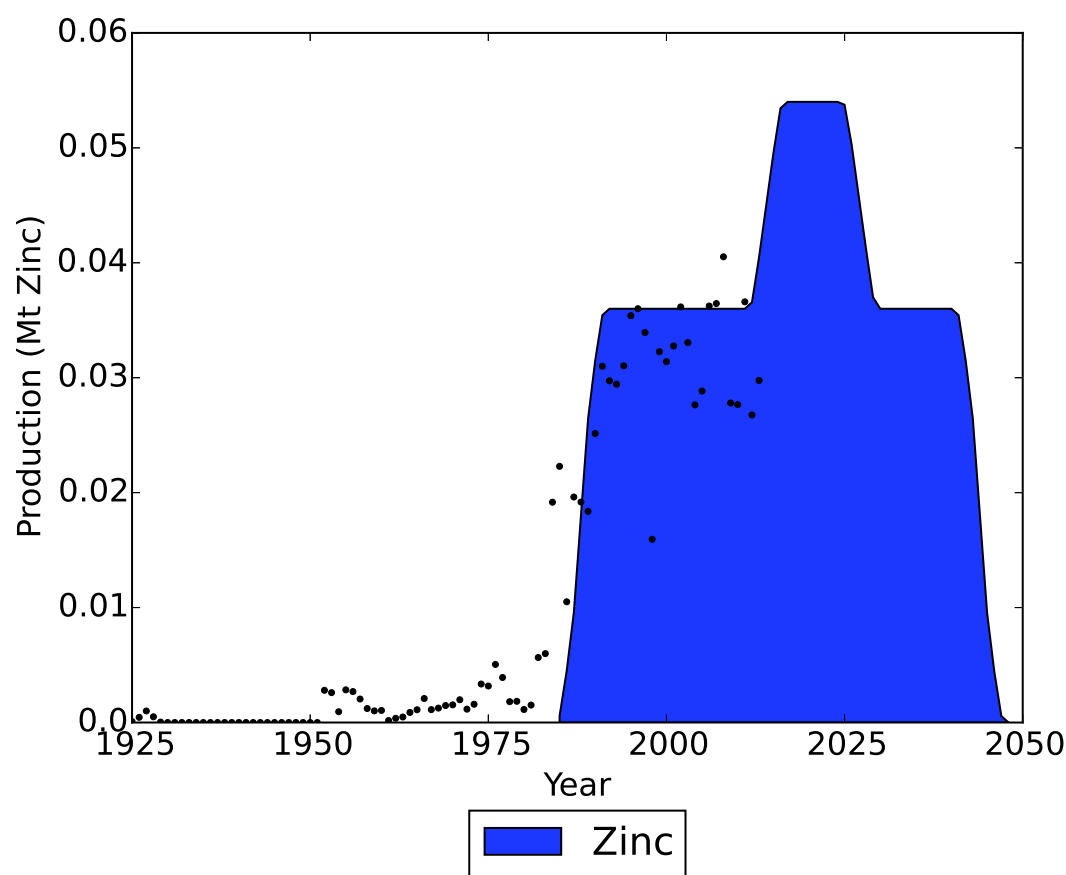

Figure 7.7: Chile projections capped at 16

| Table 7.7: Peak years - All |      |           |           |
|-----------------------------|------|-----------|-----------|
| Name                        | URR  | Peak Year | Peak Rate |
| Zinc                        | 2.25 | 2017      | 0.05      |
| Total                       | 2.25 | 2017      | 0.05      |

7.4.2 By Mineral

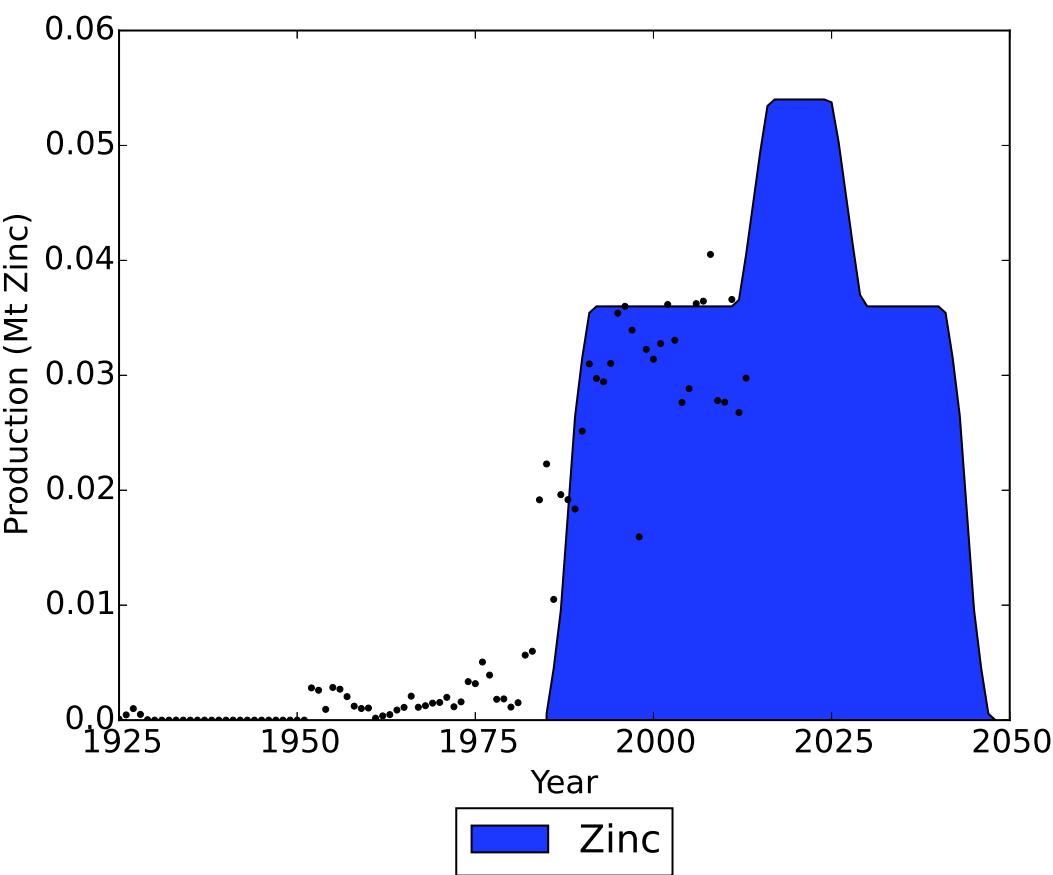

Figure 7.8: Chile projection by mineral type

| Table 7.8: Peak years - Minerals |      |           |           |
|----------------------------------|------|-----------|-----------|
| Name                             | URR  | Peak Year | Peak Rate |
| Zinc                             | 2.25 | 2017      | 0.05      |
| Total                            | 2.25 | 2017      | 0.05      |



7.5 Colombia

7.5.1 All Projections

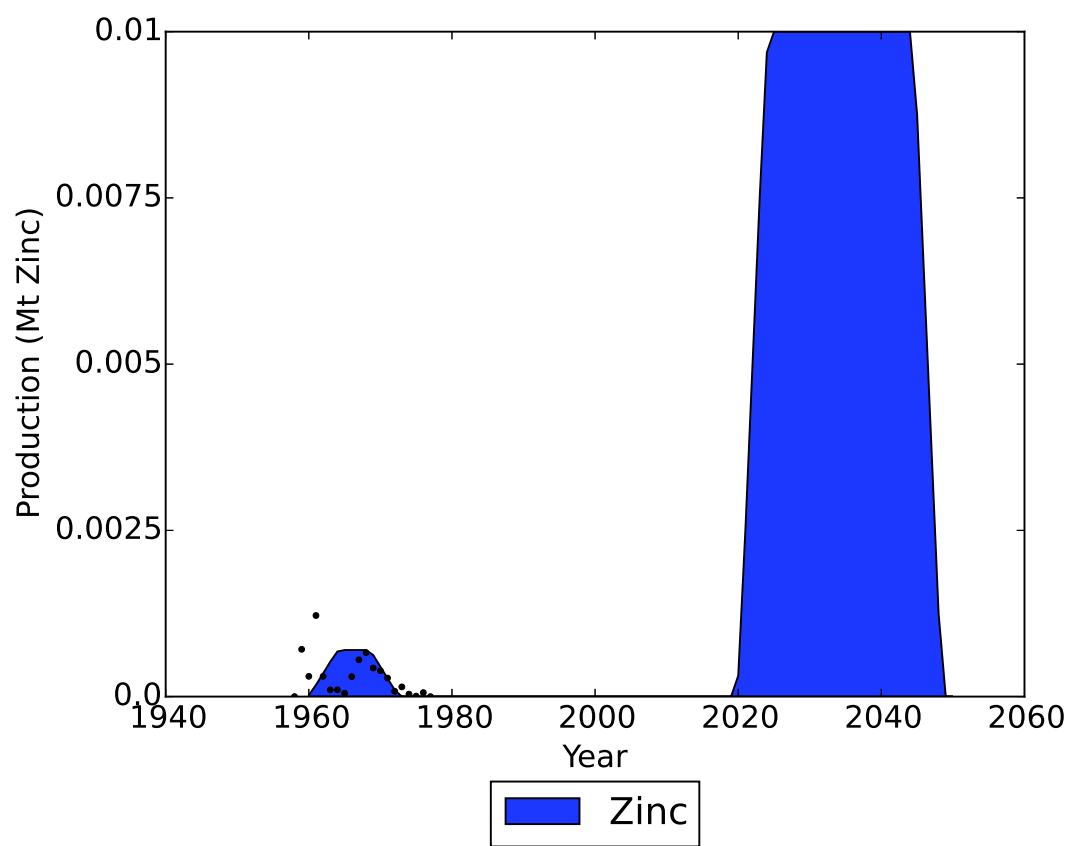

Figure 7.9: Colombia projections capped at 16

| Table 7.9: Peak years - All |      |           |           |
|-----------------------------|------|-----------|-----------|
| Name                        | URR  | Peak Year | Peak Rate |
| Zinc                        | 0.25 | 2025      | 0.01      |
| Total                       | 0.25 | 2025      | 0.01      |

7.5.2 By Mineral

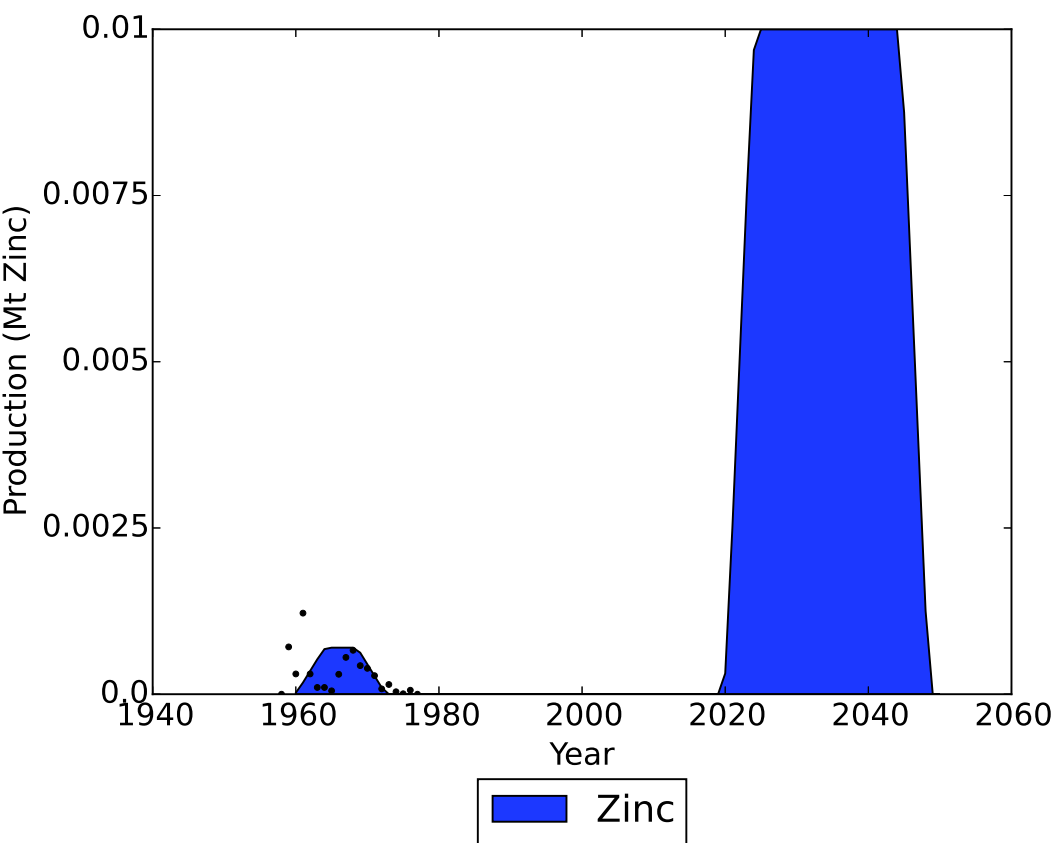

Figure 7.10: Colombia projection by mineral type

Table 7.10: Peak years - Minerals

| Name  | URR  | Peak Year | Peak Rate |
|-------|------|-----------|-----------|
| Zinc  | 0.25 | 2025      | 0.01      |
| Total | 0.25 | 2025      | 0.01      |

7.6
Ecuador

7.6.1
All Projections

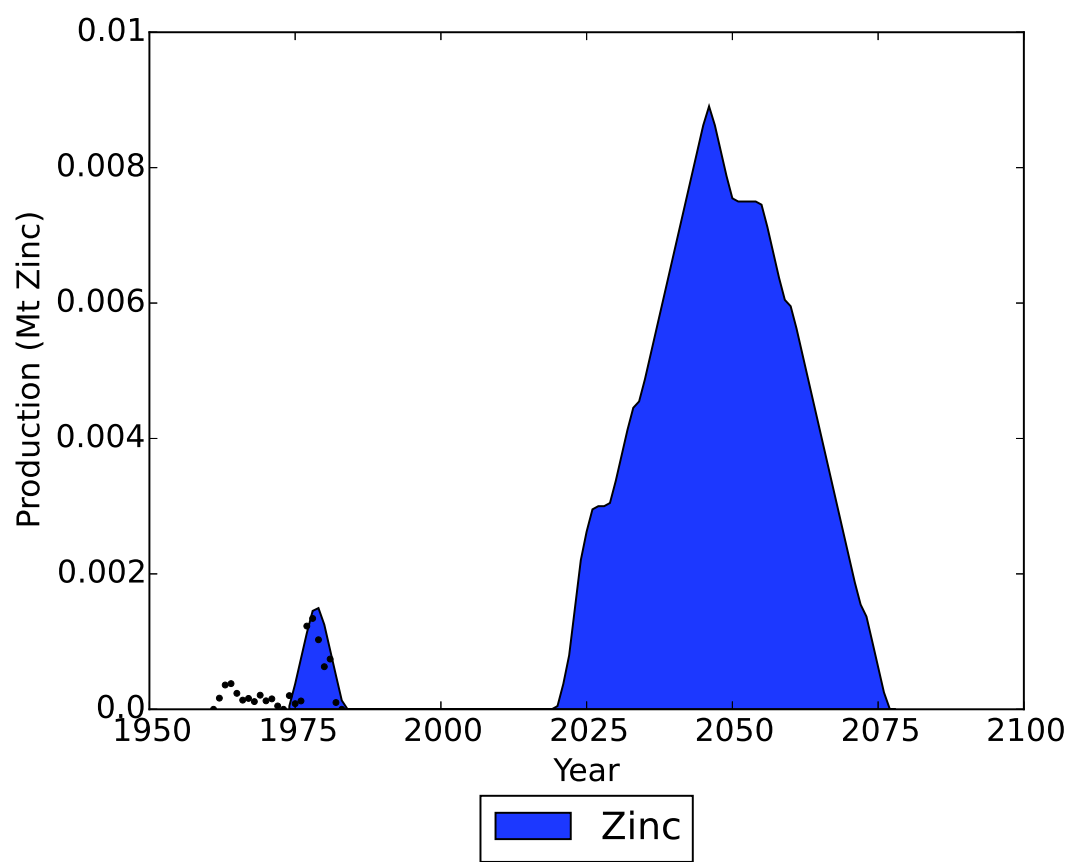

Figure 7.11: Ecuador projections capped at 16

| Table 7.11: Peak years - All |             |             |             |
|------------------------------|-------------|-------------|-------------|
| Name                         | URR         | Peak Year   | Peak Rate   |
| Zinc                         | 0.28        | 2046        | 0.01        |
| <b>Total</b>                 | <b>0.28</b> | <b>2046</b> | <b>0.01</b> |

7.6.2 By Mineral

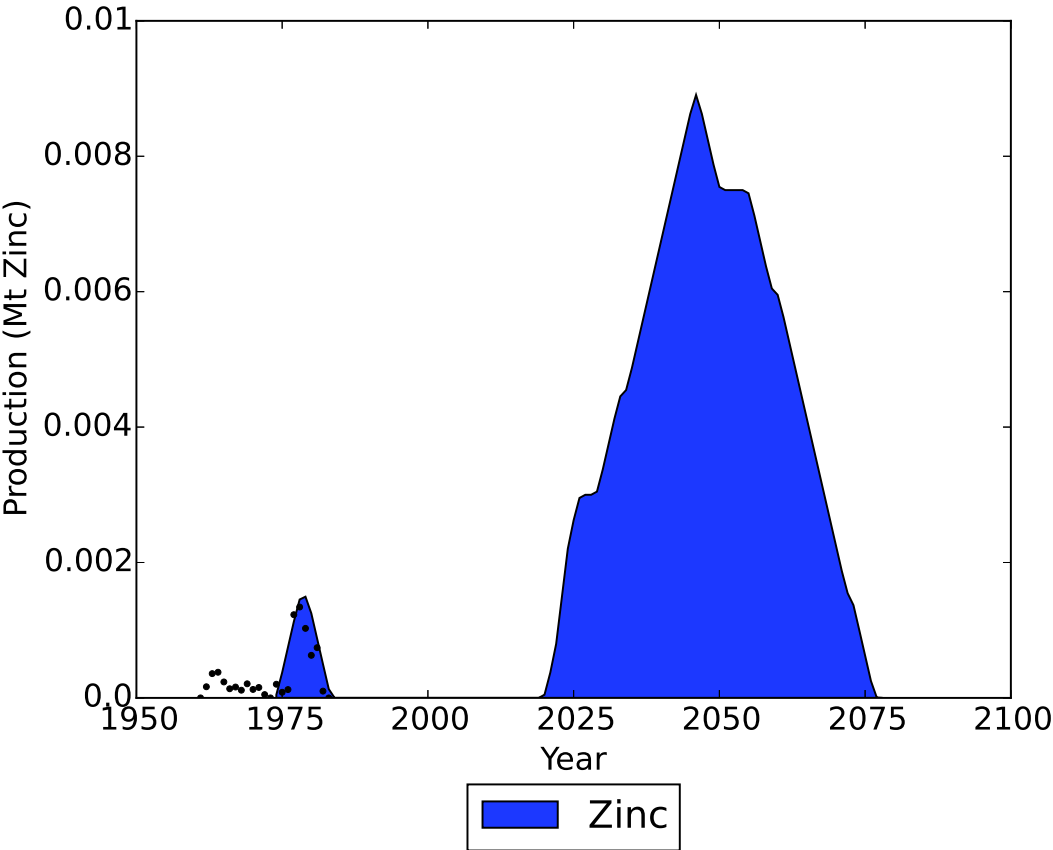

Figure 7.12: Ecuador projection by mineral type

| Table 7.12: Peak years - Minerals |      |           |           |
|-----------------------------------|------|-----------|-----------|
| Name                              | URR  | Peak Year | Peak Rate |
| Zinc                              | 0.28 | 2046      | 0.01      |
| Total                             | 0.28 | 2046      | 0.01      |

7.7 Peru

7.7.1 All Projections

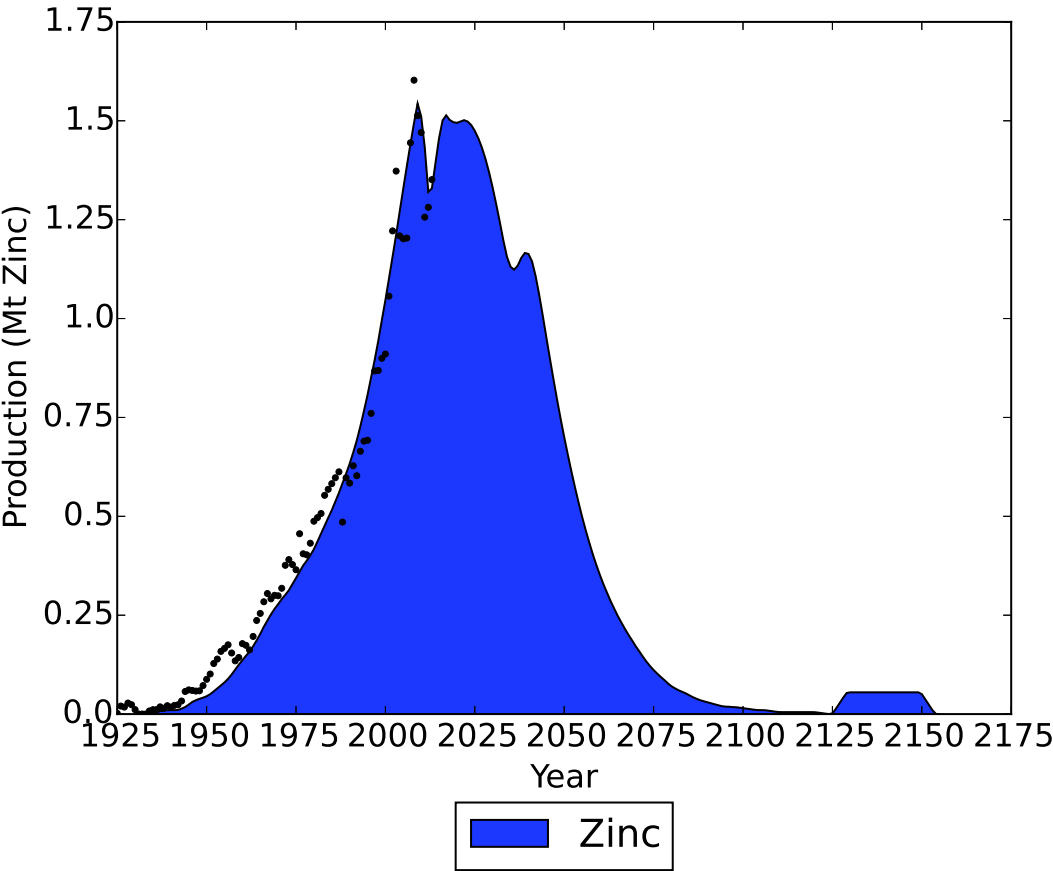

Figure 7.13: Peru projections capped at 16

Table 7.13: Peak years - All

| Name  | URR  | Peak Year | Peak Rate |
|-------|------|-----------|-----------|
| Zinc  | 94.5 | 2009      | 1.54      |
| Total | 94.5 | 2009      | 1.54      |

7.7.2 By Mineral

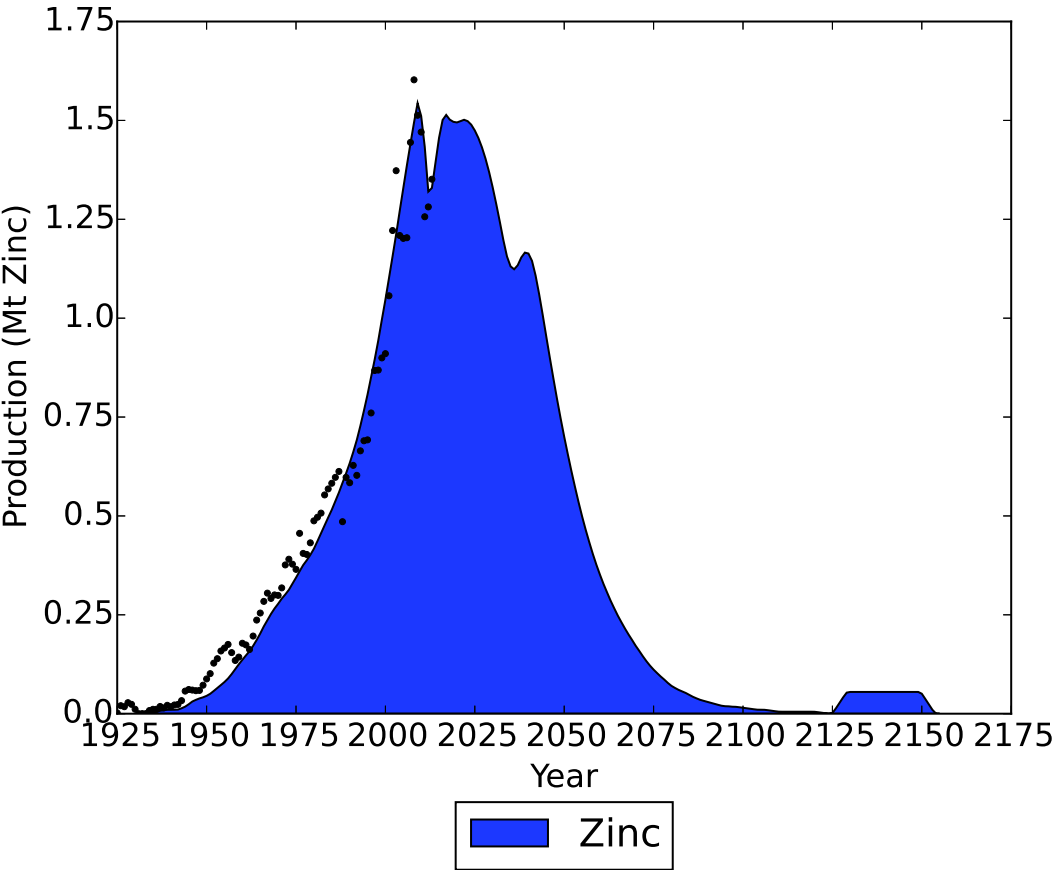

Figure 7.14: Peru projection by mineral type

| Table 7.14: Peak years - Minerals |      |           |           |
|-----------------------------------|------|-----------|-----------|
| Name                              | URR  | Peak Year | Peak Rate |
| Zinc                              | 94.5 | 2009      | 1.54      |
| Total                             | 94.5 | 2009      | 1.54      |

7.8 Total

7.8.1 By country

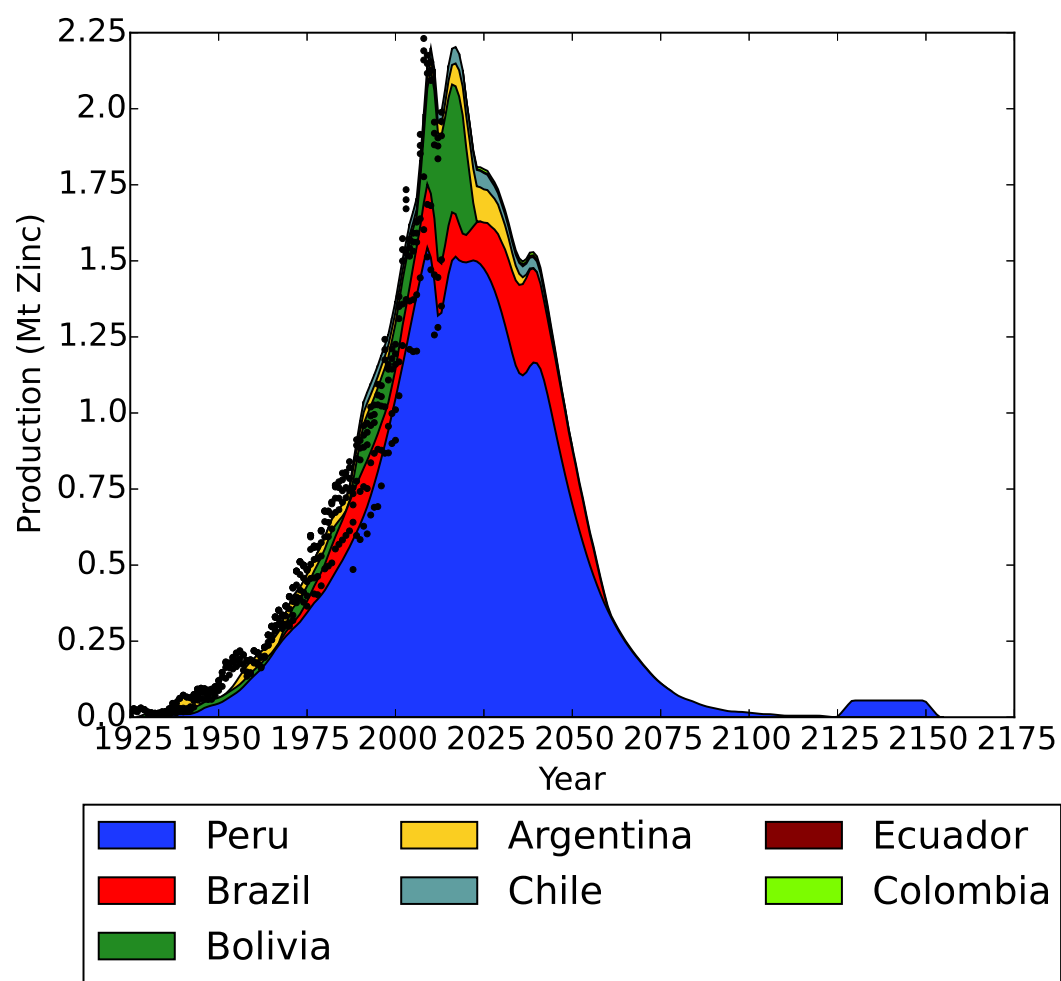

Figure 7.15: South America projections by country

7.8.2 By mineral

| Table 7.15: Peak years - All |               |             |            |
|------------------------------|---------------|-------------|------------|
| Name                         | URR           | Peak Year   | Peak Rate  |
| Peru                         | 94.5          | 2009        | 1.54       |
| Brazil                       | 13.89         | 2038        | 0.32       |
| Bolivia                      | 9.38          | 2011        | 0.42       |
| Argentina                    | 4.31          | 2023        | 0.12       |
| Chile                        | 2.25          | 2017        | 0.05       |
| Ecuador                      | 0.28          | 2046        | 0.01       |
| Colombia                     | 0.25          | 2025        | 0.01       |
| <b>Total</b>                 | <b>124.86</b> | <b>2017</b> | <b>2.2</b> |

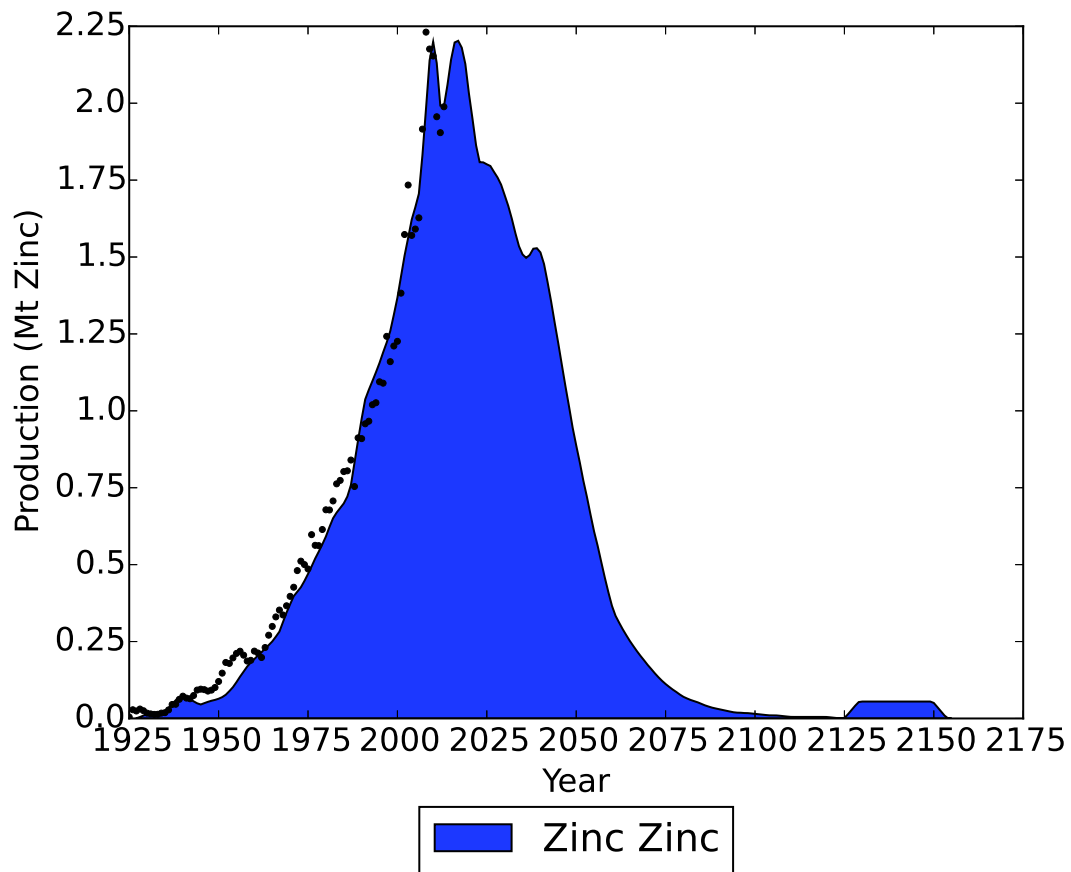

Figure 7.16: South America projection by mineral type

| Table 7.16: Peak years - Minerals |               |             |            |
|-----------------------------------|---------------|-------------|------------|
| Name                              | URR           | Peak Year   | Peak Rate  |
| Zinc Zinc                         | 124.86        | 2017        | 2.2        |
| <b>Total</b>                      | <b>124.86</b> | <b>2017</b> | <b>2.2</b> |



# Chapter 8

# Total

## 8.1 By continent

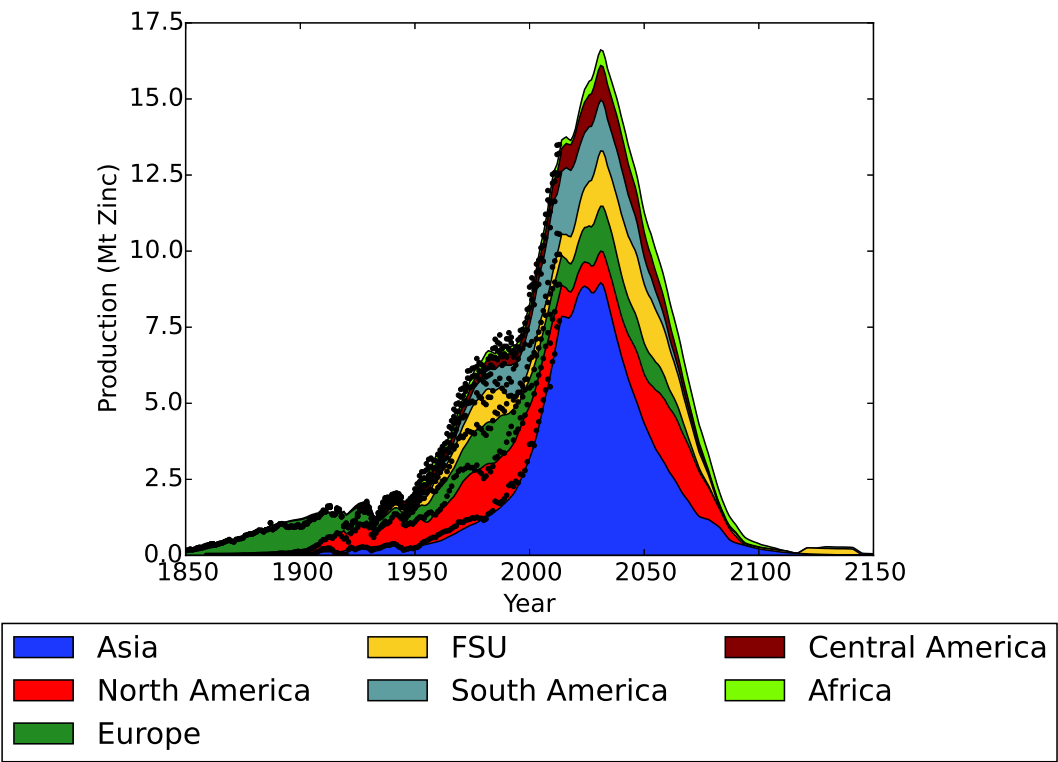

Figure 8.1: Total projections by continent

Table 8.1: Peak years - All

| <b>Name</b>     | <b>URR</b>     | <b>Peak Year</b> | <b>Peak Rate</b> |
|-----------------|----------------|------------------|------------------|
| Asia            | 496.12         | 2031             | 8.96             |
| North America   | 220.78         | 2063             | 2.11             |
| Europe          | 181.92         | 2035             | 1.54             |
| FSU             | 138.03         | 2046             | 2.06             |
| South America   | 124.86         | 2017             | 2.2              |
| Central America | 75.19          | 2032             | 1.15             |
| Africa          | 60.55          | 2065             | 0.74             |
| <b>Total</b>    | <b>1297.44</b> | <b>2031</b>      | <b>16.61</b>     |

8.2 By mineral

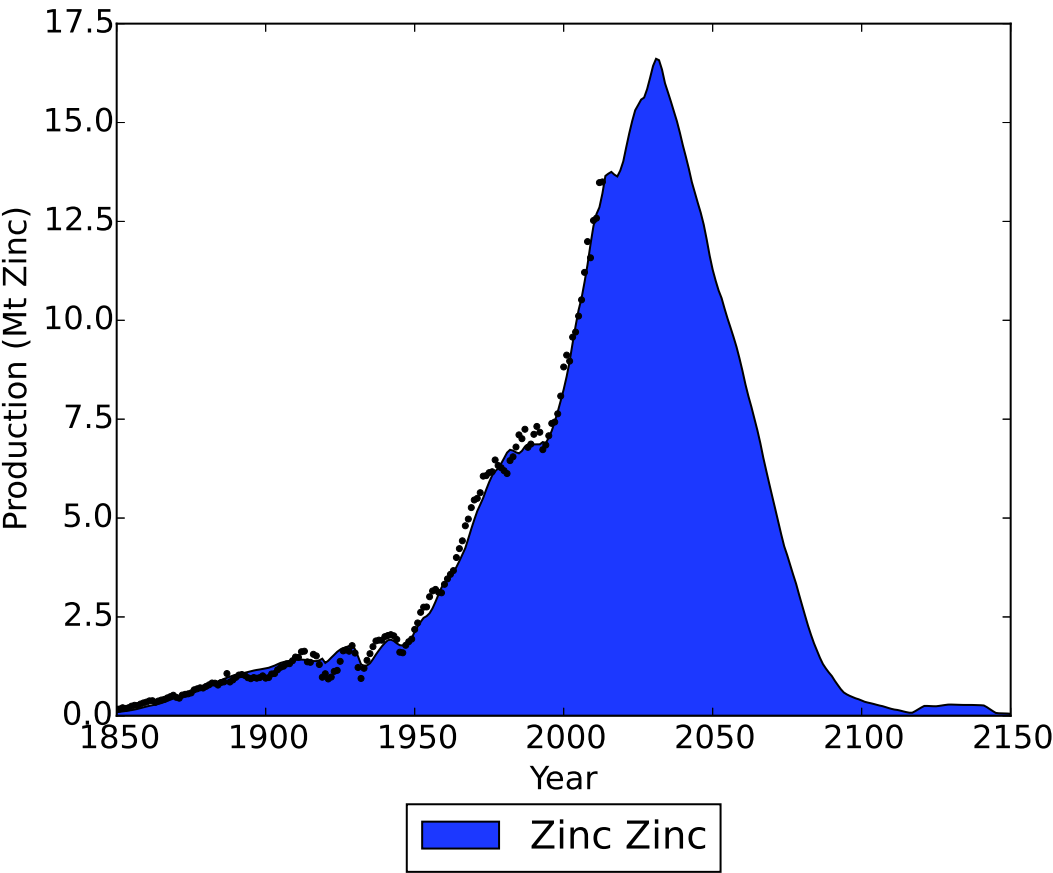

Figure 8.2: Total projection by mineral type

| Table 8.2: Peak year by mineral |         |           |           |
|---------------------------------|---------|-----------|-----------|
| Name                            | URR     | Peak Year | Peak Rate |
| Zinc Zinc                       | 1297.44 | 2031      | 16.61     |
| Total                           | 1297.44 | 2031      | 16.61     |

8.3 By Country

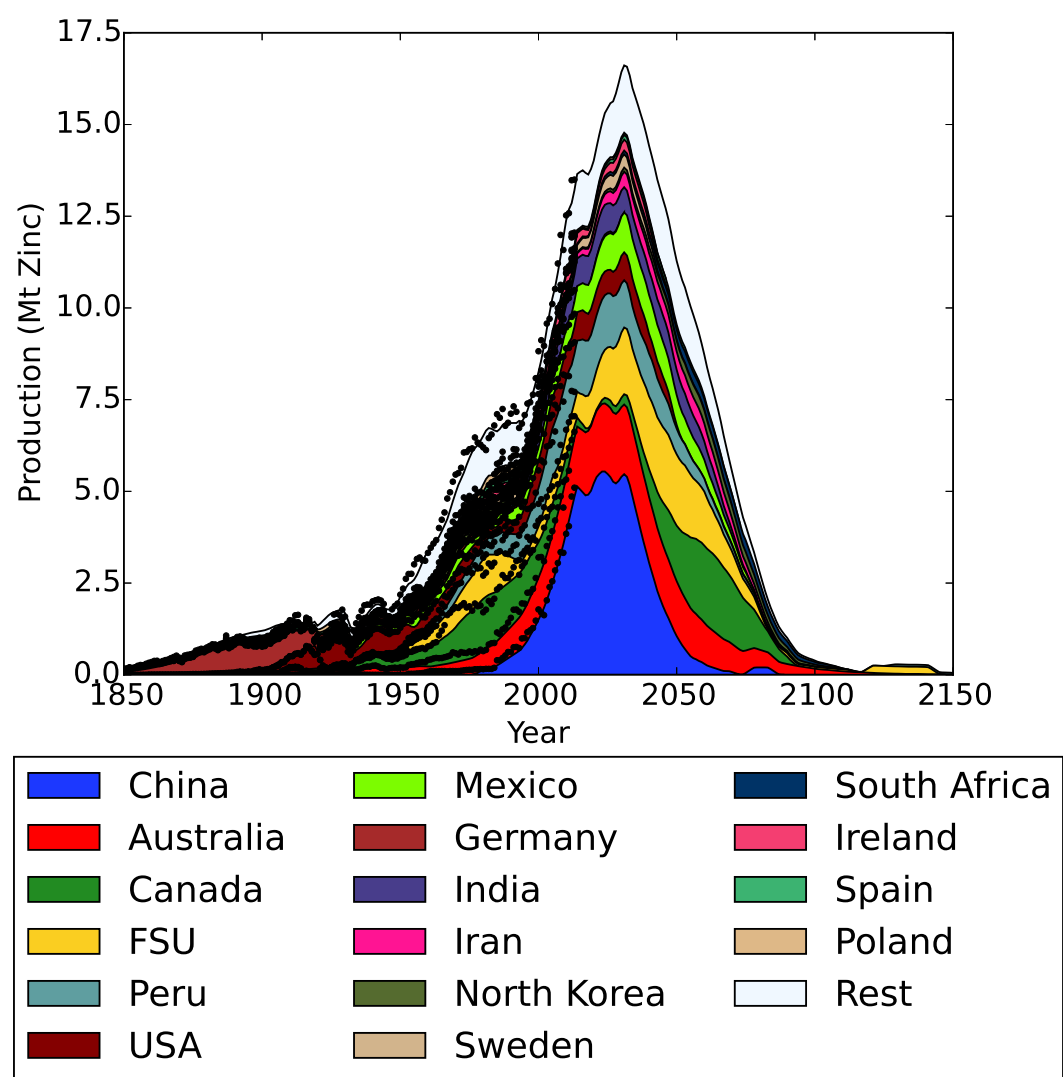

Figure 8.3: Total projection by country

Table 8.3: Peak year - Country

| Name         | URR    | Peak Year | Peak Rate |
|--------------|--------|-----------|-----------|
| China        | 213.22 | 2023      | 5.54      |
| Australia    | 153.66 | 2030      | 1.9       |
| Canada       | 139.81 | 2060      | 2.1       |
| FSU          | 138.03 | 2046      | 2.06      |
| Peru         | 94.5   | 2009      | 1.54      |
| USA          | 80.96  | 2006      | 0.85      |
| Mexico       | 71.84  | 2032      | 1.1       |
| Germany      | 48.18  | 1897      | 0.85      |
| India        | 45.88  | 2022      | 0.83      |
| Iran         | 29.06  | 2055      | 0.5       |
| North Korea  | 23.03  | 2062      | 0.36      |
| Sweden       | 20.19  | 2028      | 0.39      |
| South Africa | 20.14  | 2066      | 0.34      |
| Ireland      | 17.88  | 2009      | 0.47      |
| Spain        | 16.24  | 1990      | 0.26      |
| Poland       | 14.21  | 1984      | 0.24      |
| Brazil       | 13.89  | 2038      | 0.32      |
| Finland      | 13.82  | 2054      | 0.32      |
| Japan        | 10.58  | 1976      | 0.29      |
| Greenland    | 9.45   | 2048      | 0.27      |
| Zaire        | 9.41   | 2057      | 0.15      |
| Bolivia      | 9.38   | 2011      | 0.42      |
| Portugal     | 8.56   | 2037      | 0.22      |
| Namibia      | 7.81   | 2007      | 0.2       |
| Italy        | 7.68   | 1966      | 0.15      |
| Algeria      | 7.53   | 2069      | 0.14      |
| Mongolia     | 5.09   | 2029      | 0.15      |
| Morocco      | 4.48   | 2001      | 0.12      |
| Argentina    | 4.31   | 2023      | 0.12      |
| Turkey       | 4.29   | 2014      | 0.22      |
| Yugoslavia   | 4.16   | 1977      | 0.11      |
| Bulgaria     | 3.47   | 1974      | 0.09      |
| Saudi Arabia | 3.16   | 2043      | 0.1       |
| Greece       | 2.87   | 2034      | 0.05      |
| Eritrea      | 2.85   | 2068      | 0.07      |
| Indonesia    | 2.55   | 2056      | 0.07      |
| Zambia       | 2.38   | 1969      | 0.06      |
| Chile        | 2.25   | 2017      | 0.05      |
| Pakistan     | 2.0    | 2044      | 0.09      |
| Romania      | 2.0    | 1976      | 0.07      |
| Honduras     | 1.89   | 1995      | 0.05      |
| France       | 1.88   | 1969      | 0.03      |
| Sudan        | 1.88   | 2046      | 0.06      |
| South Korea  | 1.5    | 1980      | 0.06      |
| Thailand     | 1.45   | 1992      | 0.08      |
| Burma        | 1.42   | 1923      | 0.06      |
| Tunisia      | 1.39   | 1999      | 0.04      |
| Vietnam      | 1.3    | 2008      | 0.05      |
| Burkina Faso | 1.27   | 2051      | 0.05      |

Table 8.3: Peak year - Country – Continued

| <b>Name</b>            | <b>URR</b>     | <b>Peak Year</b> | <b>Peak Rate</b> |
|------------------------|----------------|------------------|------------------|
| Yemen                  | 1.15           | 2046             | 0.05             |
| Austria                | 1.1            | 1977             | 0.02             |
| Bosnia and Herzegovina | 1.02           | 2038             | 0.03             |
| Norway                 | 1.0            | 1979             | 0.03             |
| UK                     | 0.91           | 1900             | 0.01             |
| Belgium                | 0.89           | 1862             | 0.03             |
| Macedonia              | 0.7            | 2012             | 0.03             |
| Serbia                 | 0.67           | 2038             | 0.02             |
| Guatemala              | 0.64           | 2017             | 0.02             |
| Nigeria                | 0.52           | 2031             | 0.03             |
| Botswana               | 0.45           | 2032             | 0.02             |
| Philippines            | 0.4            | 2013             | 0.02             |
| Montenegro             | 0.37           | 2026             | 0.01             |
| Cuba                   | 0.37           | 2032             | 0.02             |
| Dominican Republic     | 0.37           | 2029             | 0.02             |
| Nepal                  | 0.35           | 2036             | 0.02             |
| Ecuador                | 0.28           | 2046             | 0.01             |
| Laos                   | 0.26           | 2025             | 0.02             |
| Colombia               | 0.25           | 2025             | 0.01             |
| Egypt                  | 0.2            | 2048             | 0.01             |
| Czechoslovakia         | 0.19           | 1975             | 0.01             |
| Kosovo                 | 0.11           | 2013             | 0.01             |
| Tanzania               | 0.1            | 2042             | –                |
| Nicaragua              | 0.09           | 1974             | 0.02             |
| Hungary                | 0.08           | 1972             | –                |
| Kenya                  | 0.07           | 2035             | 0.01             |
| Congo                  | 0.07           | 1965             | 0.01             |
| PNG                    | 0.05           | 2032             | –                |
| Slovenia               | –              | 1994             | –                |
| New Caledonia          | –              | 1929             | –                |
| Slovakia               | –              | 2013             | –                |
| Angola                 | –              | 1951             | –                |
| El Salvador            | –              | 1951             | –                |
| Zimbabwe               | –              | 1928             | –                |
| <b>Total</b>           | <b>1297.44</b> | <b>2031</b>      | <b>16.61</b>     |
